# Supplementary material
Source: PubMed Central journal article supplement (PMC4632242)
Supplement: NIHMS726302-supplement-01.pdf [file NIHMS726302-supplement-01.pdf]

Web Appendix A. Country-specific stroke (IS and HS) burden counts in 1990 and 2013 by sex.

| Country     | measure | sex    | year  | number         | Uncertainty Interval | Rate          | Uncertainty Interval |
|-------------|---------|--------|-------|----------------|----------------------|---------------|----------------------|
| Afghanistan | Deaths  | Male   | 1990  | 2,357          | (1,593 to 3,334)     | 217.4         | (152.9 to 292.1)     |
|             |         |        | 2013  | 8,261          | (5,476 to 11,620)    | 231.1         | (162.3 to 307.3)     |
|             |         | Female | 1990  | 4,560          | (2,980 to 7,091)     | 300           | (209.2 to 432.6)     |
|             |         |        | 2013  | 15,016         | (9,911 to 23,549)    | 329.9         | (229.5 to 480.5)     |
|             |         | Both   | 1990  | 6,918          | (5,172 to 9,714)     | 262.8         | (207.7 to 341.9)     |
|             |         |        | 2013  | 23,277         | (16,937 to 31,926)   | 284.3         | (218.6 to 368.2)     |
|             | DALYs   | Male   | 1990  | 65,016         | (42,544 to 93,712)   | 3945.4        | (2701.3 to 5513.6)   |
|             |         |        | 2013  | 210,046        | (135,499 to 310,295) | 4152.9        | (2773.5 to 5781.6)   |
|             |         | Female | 1990  | 132,316        | (82,722 to 217,528)  | 6102.8        | (4030.8 to 9384.4)   |
|             |         |        | 2013  | 402,767        | (248,174 to 672,352) | 6621.6        | (4348.2 to 10451.6)  |
|             |         | Both   | 1990  | 197,332        | (143,135 to 289,787) | 5091          | (3856.3 to 6997.3)   |
|             |         |        | 2013  | 612,813        | (427,918 to 879,037) | 5432          | (3961.3 to 7437.3)   |
| YLDs        | Male    | 1990   | 212   | (137 to 301)   | 10.4                 | (6.7 to 15.1) |                      |
|             |         | 2013   | 651   | (431 to 915)   | 10.8                 | (7.3 to 15.2) |                      |
|             | Female  | 1990   | 188   | (118 to 272)   | 8.7                  | (5.7 to 12.3) |                      |
|             |         | 2013   | 553   | (363 to 781)   | 8.8                  | (5.8 to 12.3) |                      |
|             | Both    | 1990   | 401   | (264 to 553)   | 9.5                  | (6.4 to 13.0) |                      |
|             |         | 2013   | 1,205 | (830 to 1,658) | 9.8                  | (6.8 to 13.3) |                      |
| Albania     | Deaths  | Male   | 1990  | 1,422          | (1,261 to 1,591)     | 194.1         | (172.4 to 217.1)     |
|             |         |        | 2013  | 3,213          | (2,499 to 4,025)     | 216.2         | (171.2 to 270.1)     |
|             |         | Female | 1990  | 1,611          | (1,462 to 1,845)     | 178.7         | (161.7 to 204.1)     |
|             |         |        | 2013  | 3,056          | (2,478 to 3,780)     | 169.4         | (136.9 to 209.0)     |
|             |         | Both   | 1990  | 3,033          | (2,833 to 3,321)     | 186.1         | (173.4 to 205.3)     |

|         |        |        |      |         |                      |        |                    |
|---------|--------|--------|------|---------|----------------------|--------|--------------------|
|         |        |        | 2013 | 6,269   | (5,345 to 7,314)     | 191.6  | (164.1 to 223.1)   |
|         | DALYs  | Male   | 1990 | 26,809  | (23,645 to 30,171)   | 2843.1 | (2516.9 to 3173.7) |
|         |        |        | 2013 | 51,152  | (38,591 to 65,968)   | 3154.6 | (2415.8 to 4027.2) |
|         |        | Female | 1990 | 25,161  | (22,668 to 29,126)   | 2444.9 | (2189.4 to 2784.9) |
|         |        |        | 2013 | 38,531  | (30,131 to 49,810)   | 2139.2 | (1668.9 to 2745.8) |
|         |        | Both   | 1990 | 51,970  | (48,314 to 57,103)   | 2635.4 | (2452.1 to 2869.9) |
|         |        |        | 2013 | 89,683  | (74,215 to 107,491)  | 2625.2 | (2179.7 to 3130.6) |
|         | YLDs   | Male   | 1990 | 305     | (195 to 437)         | 27.4   | (17.7 to 39.1)     |
|         |        |        | 2013 | 526     | (348 to 763)         | 30.7   | (20.6 to 44.1)     |
|         |        | Female | 1990 | 208     | (139 to 293)         | 18.7   | (12.4 to 26.2)     |
|         |        |        | 2013 | 331     | (219 to 479)         | 18.3   | (12.2 to 26.6)     |
|         |        | Both   | 1990 | 514     | (353 to 700)         | 23     | (15.7 to 31.4)     |
|         |        |        | 2013 | 857     | (579 to 1,196)       | 24.3   | (16.5 to 33.9)     |
| Algeria | Deaths | Male   | 1990 | 5,681   | (4,576 to 7,010)     | 150.2  | (121.8 to 184.1)   |
|         |        |        | 2013 | 10,152  | (8,189 to 12,346)    | 115.7  | (93.6 to 138.6)    |
|         |        | Female | 1990 | 7,268   | (6,053 to 8,838)     | 154.4  | (129.7 to 185.9)   |
|         |        |        | 2013 | 12,294  | (10,131 to 15,116)   | 126.1  | (103.8 to 154.9)   |
|         |        | Both   | 1990 | 12,949  | (11,199 to 15,079)   | 152.4  | (133.1 to 175.0)   |
|         |        |        | 2013 | 22,446  | (19,563 to 25,850)   | 121.2  | (106.3 to 139.4)   |
|         | DALYs  | Male   | 1990 | 141,644 | (112,242 to 177,400) | 2418.6 | (1926.6 to 2992.8) |
|         |        |        | 2013 | 197,976 | (157,421 to 244,575) | 1706.5 | (1374.5 to 2087.2) |
|         |        | Female | 1990 | 171,808 | (137,176 to 220,419) | 2533.2 | (2081.5 to 3120.0) |
|         |        |        | 2013 | 225,830 | (186,222 to 278,661) | 1845.6 | (1528.7 to 2285.2) |
|         |        | Both   | 1990 | 313,452 | (264,396 to 374,085) | 2474.7 | (2118.3 to 2900.0) |
|         |        |        | 2013 | 423,806 | (365,843 to 491,044) | 1778.2 | (1544.6 to 2059.2) |
|         | YLDs   | Male   | 1990 | 613     | (409 to 868)         | 10.6   | (7.0 to 14.8)      |
|         |        |        | 2013 | 1,549   | (986 to 2,174)       | 11.5   | (7.4 to 16.2)      |

|         |        |        |      |        |                   |        |                   |
|---------|--------|--------|------|--------|-------------------|--------|-------------------|
|         |        | Female | 1990 | 581    | (391 to 812)      | 9.3    | (6.2 to 13.0)     |
|         |        |        | 2013 | 1,205  | (789 to 1,678)    | 8.9    | (5.9 to 12.3)     |
|         |        | Both   | 1990 | 1,195  | (820 to 1,620)    | 9.9    | (6.8 to 13.3)     |
|         |        |        | 2013 | 2,755  | (1,851 to 3,754)  | 10.2   | (6.8 to 13.9)     |
| Andorra | Deaths | Male   | 1990 | 19     | (13 to 26)        | 73.3   | (52.5 to 102.4)   |
|         |        |        | 2013 | 30     | (21 to 41)        | 47.2   | (33.3 to 65.6)    |
|         |        | Female | 1990 | 31     | (20 to 42)        | 62.7   | (39.5 to 85.1)    |
|         |        |        | 2013 | 44     | (27 to 65)        | 40.2   | (24.9 to 59.9)    |
|         |        | Both   | 1990 | 50     | (38 to 64)        | 67.6   | (51.4 to 85.6)    |
|         |        |        | 2013 | 74     | (55 to 99)        | 43.6   | (32.6 to 57.7)    |
|         | DALYs  | Male   | 1990 | 283    | (204 to 391)      | 1039.1 | (749.0 to 1435.8) |
|         |        |        | 2013 | 377    | (283 to 517)      | 628.3  | (469.2 to 863.5)  |
|         |        | Female | 1990 | 306    | (199 to 410)      | 690.9  | (448.7 to 939.6)  |
|         |        |        | 2013 | 366    | (251 to 527)      | 406.4  | (272.0 to 581.4)  |
|         |        | Both   | 1990 | 589    | (461 to 741)      | 841.4  | (654.1 to 1072.1) |
|         |        |        | 2013 | 744    | (589 to 952)      | 507.5  | (398.2 to 651.0)  |
|         | YLDs   | Male   | 1990 | 30     | (20 to 41)        | 110.7  | (73.4 to 149.1)   |
|         |        |        | 2013 | 59     | (39 to 83)        | 102.9  | (67.7 to 143.1)   |
|         |        | Female | 1990 | 30     | (20 to 43)        | 77.1   | (50.5 to 110.2)   |
|         |        |        | 2013 | 53     | (35 to 73)        | 72.9   | (48.3 to 99.5)    |
|         |        | Both   | 1990 | 61     | (42 to 82)        | 91.2   | (62.8 to 122.4)   |
|         |        |        | 2013 | 113    | (78 to 150)       | 86.5   | (60.0 to 115.4)   |
| Angola  | Deaths | Male   | 1990 | 3,088  | (1,918 to 4,280)  | 214.5  | (138.0 to 288.9)  |
|         |        |        | 2013 | 5,238  | (3,910 to 7,752)  | 197.6  | (152.1 to 279.1)  |
|         |        | Female | 1990 | 3,514  | (2,253 to 5,115)  | 224.3  | (147.6 to 314.1)  |
|         |        |        | 2013 | 6,180  | (4,259 to 9,303)  | 210.9  | (147.7 to 306.8)  |
|         |        | Both   | 1990 | 6,603  | (4,288 to 9,283)  | 221.6  | (148.7 to 302.5)  |
|         |        |        | 2013 | 11,419 | (8,494 to 16,751) | 205.9  | (156.8 to 290.7)  |

|                     | DALYs   | Male   | 1990 | 90,454  | (57,576 to 126,396)  | 4282.6 | (2660.4 to 5942.3)   |
|---------------------|---------|--------|------|---------|----------------------|--------|----------------------|
| Country             | measure | sex    | year | number  | Uncertainty Interval | Rate   | Uncertainty Interval |
|                     |         |        | 2013 | 141,298 | (102,913 to 210,035) | 3614   | (2703.9 to 5369.8)   |
|                     |         | Female | 1990 | 89,356  | (55,613 to 131,073)  | 3983.8 | (2543.3 to 5850.1)   |
|                     |         |        | 2013 | 142,582 | (95,861 to 222,576)  | 3487.1 | (2383.6 to 5273.3)   |
|                     |         | Both   | 1990 | 179,810 | (119,880 to 251,680) | 4142   | (2662.8 to 5843.9)   |
|                     |         |        | 2013 | 283,880 | (205,860 to 419,748) | 3560.2 | (2630.1 to 5252.4)   |
|                     | YLDs    | Male   | 1990 | 364     | (237 to 528)         | 17.6   | (11.4 to 24.9)       |
|                     |         |        | 2013 | 755     | (496 to 1,072)       | 17.8   | (11.7 to 24.8)       |
|                     |         | Female | 1990 | 308     | (203 to 431)         | 13.1   | (8.5 to 18.4)        |
|                     |         |        | 2013 | 676     | (444 to 949)         | 14.6   | (9.5 to 20.7)        |
|                     |         | Both   | 1990 | 673     | (454 to 933)         | 15.2   | (10.2 to 21.0)       |
|                     |         |        | 2013 | 1,432   | (979 to 1,932)       | 16.1   | (11.0 to 21.8)       |
| Antigua and Barbuda | Deaths  | Male   | 1990 | 27      | (23 to 33)           | 145.3  | (120.8 to 173.4)     |
|                     |         |        | 2013 | 33      | (25 to 43)           | 114.1  | (85.8 to 145.5)      |
|                     |         | Female | 1990 | 41      | (32 to 46)           | 144.5  | (111.4 to 163.5)     |
|                     |         |        | 2013 | 38      | (28 to 52)           | 93.6   | (69.7 to 129.8)      |
|                     |         | Both   | 1990 | 69      | (58 to 77)           | 147    | (124.0 to 163.5)     |
|                     |         |        | 2013 | 71      | (58 to 86)           | 103.1  | (84.9 to 124.6)      |
|                     | DALYs   | Male   | 1990 | 548     | (455 to 655)         | 2603   | (2183.2 to 3097.7)   |
|                     |         |        | 2013 | 662     | (490 to 880)         | 1960.2 | (1467.2 to 2557.3)   |
|                     |         | Female | 1990 | 619     | (481 to 708)         | 2232   | (1734.0 to 2560.5)   |
|                     |         |        | 2013 | 575     | (411 to 810)         | 1385.1 | (989.4 to 1952.1)    |
|                     |         | Both   | 1990 | 1,167   | (1,007 to 1,304)     | 2414.8 | (2085.0 to 2702.7)   |
|                     |         |        | 2013 | 1,237   | (1,006 to 1,529)     | 1650   | (1345.4 to 2026.6)   |
|                     | YLDs    | Male   | 1990 | 12      | (8 to 17)            | 60     | (40.1 to 83.2)       |
|                     |         |        | 2013 | 18      | (12 to 26)           | 57.5   | (37.3 to 80.1)       |

|           |         |        |      |         |                      |        |                      |
|-----------|---------|--------|------|---------|----------------------|--------|----------------------|
|           |         | Female | 1990 | 11      | (7 to 16)            | 43.1   | (28.3 to 59.5)       |
|           |         |        | 2013 | 17      | (11 to 24)           | 42.1   | (27.6 to 60.9)       |
|           |         | Both   | 1990 | 24      | (16 to 32)           | 50.4   | (34.8 to 67.6)       |
|           |         |        | 2013 | 36      | (24 to 49)           | 49     | (33.3 to 68.0)       |
| Argentina | Deaths  | Male   | 1990 | 13,294  | (11,290 to 16,032)   | 114.8  | (97.0 to 138.9)      |
|           |         |        | 2013 | 15,178  | (12,482 to 17,925)   | 85     | (69.6 to 100.6)      |
|           |         | Female | 1990 | 15,033  | (11,528 to 16,631)   | 94     | (72.2 to 104.0)      |
|           |         |        | 2013 | 15,222  | (12,368 to 22,018)   | 51.6   | (42.5 to 74.2)       |
|           |         | Both   | 1990 | 28,327  | (24,488 to 31,225)   | 103.6  | (89.5 to 114.3)      |
|           |         |        | 2013 | 30,401  | (26,259 to 37,641)   | 65.4   | (56.7 to 80.4)       |
|           | DALYs   | Male   | 1990 | 278,682 | (239,551 to 334,408) | 2120   | (1815.0 to 2542.9)   |
|           |         |        | 2013 | 278,262 | (232,039 to 324,882) | 1478.9 | (1232.0 to 1722.0)   |
|           |         | Female | 1990 | 245,505 | (193,404 to 268,482) | 1515.2 | (1193.5 to 1657.2)   |
|           |         |        | 2013 | 200,612 | (170,726 to 282,563) | 789.3  | (674.7 to 1102.3)    |
|           |         | Both   | 1990 | 524,187 | (464,591 to 582,552) | 1791.6 | (1580.9 to 1988.6)   |
|           |         |        | 2013 | 478,875 | (424,934 to 571,826) | 1091.7 | (967.9 to 1302.1)    |
|           | YLDs    | Male   | 1990 | 6,857   | (4,687 to 9,040)     | 51.7   | (35.6 to 68.3)       |
|           |         |        |      |         |                      |        | Uncertainty Interval |
| Country   | measure | sex    | year | number  | Uncertainty Interval | Rate   | Interval             |
|           |         |        | 2013 | 8,059   | (5,519 to 11,104)    | 42.4   | (29.1 to 58.3)       |
|           |         | Female | 1990 | 4,809   | (3,236 to 6,547)     | 29.3   | (19.9 to 39.8)       |
|           |         |        | 2013 | 6,119   | (4,044 to 8,794)     | 25.1   | (16.7 to 36.0)       |
|           |         | Both   | 1990 | 11,666  | (8,000 to 15,285)    | 39.4   | (27.0 to 51.6)       |
|           |         |        | 2013 | 14,178  | (9,649 to 19,601)    | 32.7   | (22.2 to 45.1)       |
| Armenia   | Deaths  | Male   | 1990 | 1,311   | (1,123 to 1,552)     | 153.9  | (131.1 to 183.4)     |
|           |         |        | 2013 | 1,751   | (1,377 to 2,104)     | 125.9  | (99.0 to 151.1)      |
|           |         | Female | 1990 | 1,726   | (1,518 to 2,033)     | 131.6  | (115.6 to 155.6)     |
|           |         |        | 2013 | 2,082   | (1,614 to 2,488)     | 102.2  | (80.1 to 121.9)      |
|           |         | Both   | 1990 | 3,038   | (2,769 to 3,426)     | 140.6  | (128.0 to 158.8)     |

|           |        |        |      |         |                      |        |                    |
|-----------|--------|--------|------|---------|----------------------|--------|--------------------|
|           |        |        | 2013 | 3,834   | (3,263 to 4,322)     | 112.8  | (96.0 to 127.3)    |
|           | DALYs  | Male   | 1990 | 26,018  | (22,193 to 30,846)   | 2480.3 | (2124.4 to 2933.2) |
|           |        |        | 2013 | 28,155  | (22,348 to 33,981)   | 1954.8 | (1552.3 to 2360.5) |
|           |        | Female | 1990 | 27,200  | (23,908 to 32,590)   | 1906.7 | (1685.0 to 2269.4) |
|           |        |        | 2013 | 26,275  | (21,288 to 31,724)   | 1392.9 | (1137.9 to 1689.2) |
|           |        | Both   | 1990 | 53,218  | (48,508 to 60,378)   | 2149.6 | (1961.8 to 2432.7) |
|           |        |        | 2013 | 54,431  | (47,660 to 61,887)   | 1647.8 | (1446.7 to 1875.6) |
|           | YLDs   | Male   | 1990 | 198     | (130 to 282)         | 15.6   | (10.2 to 22.1)     |
|           |        |        | 2013 | 246     | (156 to 343)         | 16.4   | (10.5 to 22.8)     |
|           |        | Female | 1990 | 195     | (123 to 282)         | 12.6   | (8.0 to 18.2)      |
|           |        |        | 2013 | 226     | (148 to 313)         | 12.8   | (8.4 to 17.8)      |
|           |        | Both   | 1990 | 394     | (268 to 530)         | 14     | (9.6 to 19.1)      |
|           |        |        | 2013 | 473     | (324 to 628)         | 14.5   | (10.1 to 19.4)     |
| Australia | Deaths | Male   | 1990 | 5,001   | (4,111 to 6,289)     | 72.1   | (59.0 to 90.4)     |
|           |        |        | 2013 | 5,977   | (4,565 to 7,429)     | 37.5   | (28.7 to 46.4)     |
|           |        | Female | 1990 | 7,229   | (5,913 to 8,659)     | 66.7   | (54.6 to 79.9)     |
|           |        |        | 2013 | 8,655   | (7,042 to 11,336)    | 38.9   | (31.9 to 51.0)     |
|           |        | Both   | 1990 | 12,230  | (10,934 to 14,104)   | 69.6   | (62.1 to 80.7)     |
|           |        |        | 2013 | 14,633  | (12,318 to 17,590)   | 38.6   | (32.3 to 45.8)     |
|           | DALYs  | Male   | 1990 | 81,775  | (68,896 to 102,216)  | 1054   | (886.6 to 1308.9)  |
|           |        |        | 2013 | 77,850  | (60,288 to 93,064)   | 513.7  | (396.3 to 613.8)   |
|           |        | Female | 1990 | 85,491  | (71,541 to 101,916)  | 829.9  | (693.7 to 994.2)   |
|           |        |        | 2013 | 80,773  | (67,749 to 104,098)  | 431.1  | (363.1 to 553.5)   |
|           |        | Both   | 1990 | 167,267 | (150,956 to 193,230) | 931.9  | (841.0 to 1073.6)  |
|           |        |        | 2013 | 158,623 | (134,312 to 184,098) | 471.5  | (394.7 to 546.8)   |
|           | YLDs   | Male   | 1990 | 6,314   | (4,324 to 8,831)     | 77.4   | (53.3 to 107.7)    |
|           |        |        | 2013 | 11,371  | (7,796 to 15,335)    | 76.7   | (52.3 to 103.3)    |
|           |        | Female | 1990 | 5,086   | (3,539 to 7,100)     | 51.7   | (35.9 to 71.7)     |

|            |         |        | 2013 | 8,302   | (5,533 to 11,250)    | 50.6   | (33.8 to 68.3)       |
|------------|---------|--------|------|---------|----------------------|--------|----------------------|
|            |         | Both   | 1990 | 11,401  | (7,969 to 15,361)    | 63.3   | (44.2 to 85.1)       |
|            |         |        | 2013 | 19,673  | (13,810 to 25,840)   | 62.9   | (44.0 to 82.6)       |
| Austria    | Deaths  | Male   | 1990 | 3,676   | (3,087 to 4,433)     | 96     | (80.3 to 115.7)      |
| Country    | measure | sex    | year | number  | Uncertainty Interval | Rate   | Uncertainty Interval |
|            |         |        | 2013 | 3,010   | (2,357 to 3,690)     | 45.4   | (35.8 to 55.6)       |
|            |         | Female | 1990 | 7,061   | (5,247 to 7,805)     | 86.7   | (64.7 to 95.3)       |
|            |         |        | 2013 | 4,612   | (3,605 to 7,206)     | 40.2   | (31.9 to 62.0)       |
|            |         | Both   | 1990 | 10,738  | (9,003 to 11,821)    | 90.8   | (76.6 to 99.6)       |
|            |         |        | 2013 | 7,623   | (6,435 to 10,063)    | 42.9   | (36.4 to 56.0)       |
|            | DALYs   | Male   | 1990 | 57,137  | (48,456 to 68,205)   | 1447.7 | (1230.6 to 1726.5)   |
|            |         |        | 2013 | 44,374  | (35,804 to 52,887)   | 692.5  | (560.0 to 824.7)     |
|            |         | Female | 1990 | 80,435  | (62,272 to 87,673)   | 1126.5 | (882.3 to 1230.1)    |
|            |         |        | 2013 | 46,113  | (37,971 to 66,542)   | 496.1  | (411.5 to 710.8)     |
|            |         | Both   | 1990 | 137,572 | (119,338 to 151,005) | 1258.2 | (1097.3 to 1383.0)   |
|            |         |        | 2013 | 90,487  | (78,622 to 111,453)  | 586.7  | (511.6 to 706.6)     |
|            | YLDs    | Male   | 1990 | 4,252   | (2,870 to 5,798)     | 106.3  | (71.8 to 144.2)      |
|            |         |        | 2013 | 7,453   | (4,869 to 10,369)    | 117.3  | (77.1 to 162.2)      |
|            |         | Female | 1990 | 4,914   | (3,328 to 6,765)     | 75.8   | (51.3 to 104.2)      |
|            |         |        | 2013 | 6,121   | (3,989 to 8,593)     | 74.6   | (49.6 to 104.2)      |
|            |         | Both   | 1990 | 9,166   | (6,336 to 12,288)    | 87.5   | (60.8 to 116.8)      |
|            |         |        | 2013 | 13,574  | (9,257 to 18,405)    | 93.7   | (64.5 to 126.1)      |
| Azerbaijan | Deaths  | Male   | 1990 | 2,296   | (1,982 to 2,753)     | 182.3  | (158.1 to 218.4)     |
|            |         |        | 2013 | 3,894   | (3,030 to 4,776)     | 153.7  | (121.1 to 186.4)     |
|            |         | Female | 1990 | 2,955   | (2,660 to 3,512)     | 151.7  | (135.7 to 182.1)     |
|            |         |        | 2013 | 4,707   | (3,379 to 5,690)     | 136.6  | (98.0 to 163.8)      |
|            |         | Both   | 1990 | 5,251   | (4,832 to 5,983)     | 163.8  | (151.0 to 187.7)     |
|            |         |        | 2013 | 8,601   | (6,896 to 9,927)     | 144.4  | (115.8 to 165.9)     |

|         |        |        |      |         |                      |        |                      |
|---------|--------|--------|------|---------|----------------------|--------|----------------------|
|         | DALYs  | Male   | 1990 | 55,783  | (47,691 to 67,173)   | 3196.8 | (2763.1 to 3819.3)   |
|         |        |        | 2013 | 78,133  | (60,250 to 98,032)   | 2502   | (1942.0 to 3095.4)   |
|         |        | Female | 1990 | 57,353  | (51,107 to 68,723)   | 2422.3 | (2167.8 to 2893.1)   |
|         |        |        | 2013 | 76,480  | (55,139 to 94,166)   | 1990.8 | (1431.3 to 2436.1)   |
|         |        | Both   | 1990 | 113,136 | (103,317 to 128,605) | 2743.4 | (2521.0 to 3127.2)   |
|         |        |        | 2013 | 154,613 | (125,326 to 180,427) | 2220.6 | (1783.2 to 2574.1)   |
|         | YLDs   | Male   | 1990 | 334     | (225 to 470)         | 15.9   | (10.7 to 22.1)       |
|         |        |        | 2013 | 622     | (414 to 863)         | 16.7   | (11.1 to 22.9)       |
|         |        | Female | 1990 | 314     | (204 to 443)         | 12.2   | (7.9 to 17.1)        |
|         |        |        | 2013 | 525     | (351 to 728)         | 12.4   | (8.3 to 17.3)        |
|         |        | Both   | 1990 | 648     | (450 to 868)         | 13.9   | (9.7 to 18.6)        |
|         |        |        | 2013 | 1,148   | (789 to 1,553)       | 14.4   | (9.9 to 19.6)        |
| Bahrain | Deaths | Male   | 1990 | 76      | (60 to 107)          | 100.6  | (78.3 to 137.7)      |
|         |        |        | 2013 | 92      | (64 to 125)          | 48.3   | (34.5 to 64.5)       |
|         |        | Female | 1990 | 71      | (59 to 95)           | 121.8  | (100.4 to 165.1)     |
|         |        |        | 2013 | 99      | (74 to 126)          | 65.4   | (48.6 to 83.0)       |
|         |        | Both   | 1990 | 148     | (127 to 189)         | 109.8  | (94.4 to 139.1)      |
|         |        |        | 2013 | 192     | (153 to 231)         | 57     | (46.3 to 68.2)       |
|         | DALYs  | Male   | 1990 | 2,104   | (1,664 to 3,075)     | 1702.8 | (1333.8 to 2378.1)   |
|         |        |        |      |         |                      |        | Uncertainty Interval |
|         |        |        | 2013 | 2,356   | (1,613 to 3,215)     | 683.2  | (486.1 to 928.2)     |
|         |        | Female | 1990 | 1,924   | (1,548 to 2,449)     | 2119.6 | (1763.4 to 2790.3)   |
|         |        |        | 2013 | 1,975   | (1,439 to 2,616)     | 878.8  | (647.6 to 1129.6)    |
|         |        | Both   | 1990 | 4,029   | (3,457 to 5,100)     | 1881.4 | (1615.0 to 2385.8)   |
|         |        |        | 2013 | 4,332   | (3,386 to 5,326)     | 777.1  | (624.1 to 937.5)     |
|         | YLDs   | Male   | 1990 | 15      | (9 to 21)            | 10.8   | (7.3 to 15.2)        |
|         |        |        | 2013 | 54      | (34 to 79)           | 10.2   | (6.6 to 15.1)        |
|         |        | Female | 1990 | 7       | (4 to 10)            | 8.3    | (5.3 to 12.0)        |



|            |        |        |      |           |                          |        |                    |
|------------|--------|--------|------|-----------|--------------------------|--------|--------------------|
|            |        |        | 2013 | 24        | (15 to 34)               | 8      | (5.2 to 11.4)      |
|            |        | Both   | 1990 | 22        | (15 to 31)               | 9.8    | (6.6 to 13.3)      |
|            |        |        | 2013 | 78        | (51 to 112)              | 9.3    | (6.3 to 13.3)      |
| Bangladesh | Deaths | Male   | 1990 | 29,398    | (22,826 to 35,832)       | 134.8  | (104.9 to 161.9)   |
|            |        |        | 2013 | 86,545    | (66,234 to 111,732)      | 224.7  | (173.7 to 283.4)   |
|            |        | Female | 1990 | 28,363    | (21,980 to 38,673)       | 154.5  | (122.3 to 208.0)   |
|            |        |        | 2013 | 91,808    | (47,559 to 122,186)      | 258.2  | (133.3 to 340.9)   |
|            |        | Both   | 1990 | 57,761    | (49,563 to 67,049)       | 143.8  | (123.6 to 165.8)   |
|            |        |        | 2013 | 178,354   | (127,309 to 214,741)     | 240.8  | (172.9 to 287.6)   |
|            | DALYs  | Male   | 1990 | 628,762   | (480,241 to 780,285)     | 2347.4 | (1804.6 to 2881.5) |
|            |        |        | 2013 | 1,636,288 | (1,211,022 to 2,188,158) | 3542.4 | (2672.0 to 4625.6) |
|            |        | Female | 1990 | 590,934   | (453,641 to 816,830)     | 2660   | (2063.6 to 3630.8) |
|            |        |        | 2013 | 1,667,167 | (830,758 to 2,289,281)   | 4012.8 | (2043.8 to 5414.1) |
|            |        | Both   | 1990 | 1,219,697 | (1,041,632 to 1,440,296) | 2490.7 | (2141.2 to 2896.0) |
|            |        |        | 2013 | 3,303,456 | (2,311,184 to 4,064,255) | 3765.3 | (2654.5 to 4584.0) |
|            | YLDs   | Male   | 1990 | 12,520    | (8,124 to 17,354)        | 42.8   | (27.7 to 59.6)     |
|            |        |        | 2013 | 23,040    | (15,275 to 32,256)       | 43.9   | (29.1 to 61.9)     |
|            |        | Female | 1990 | 8,886     | (6,057 to 12,175)        | 34.8   | (23.5 to 48.1)     |
|            |        |        | 2013 | 18,071    | (12,021 to 24,717)       | 36.7   | (24.8 to 51.0)     |
|            |        | Both   | 1990 | 21,406    | (14,668 to 28,265)       | 39.1   | (26.7 to 51.5)     |
|            |        |        | 2013 | 41,112    | (27,926 to 54,844)       | 40.5   | (27.8 to 54.2)     |
| Barbados   | Deaths | Male   | 1990 | 120       | (103 to 145)             | 125.2  | (107.5 to 150.8)   |
|            |        |        | 2013 | 124       | (92 to 157)              | 94.7   | (71.3 to 120.1)    |
|            |        | Female | 1990 | 205       | (163 to 242)             | 127.4  | (101.1 to 149.5)   |
|            |        |        | 2013 | 170       | (130 to 236)             | 89.4   | (68.1 to 122.9)    |
|            |        | Both   | 1990 | 326       | (284 to 369)             | 127.8  | (111.6 to 144.7)   |

|         |         |        | 2013 | 294     | (242 to 363)         | 92.6   | (76.0 to 114.3)      |
|---------|---------|--------|------|---------|----------------------|--------|----------------------|
|         | DALYs   | Male   | 1990 | 2,123   | (1,839 to 2,519)     | 2142   | (1860.0 to 2548.0)   |
|         |         |        | 2013 | 2,264   | (1,668 to 2,856)     | 1541.1 | (1145.8 to 1934.6)   |
|         |         | Female | 1990 | 2,701   | (2,184 to 3,152)     | 1823.5 | (1475.9 to 2108.8)   |
|         |         |        | 2013 | 2,323   | (1,745 to 3,084)     | 1268   | (950.4 to 1685.1)    |
| Country | measure | sex    | year | number  | Uncertainty Interval | Rate   | Uncertainty Interval |
|         |         | Both   | 1990 | 4,824   | (4,314 to 5,367)     | 1970.8 | (1765.0 to 2180.6)   |
|         |         |        | 2013 | 4,587   | (3,795 to 5,529)     | 1401.5 | (1163.9 to 1686.6)   |
|         | YLDs    | Male   | 1990 | 58      | (39 to 79)           | 59.4   | (40.3 to 81.0)       |
|         |         |        | 2013 | 81      | (54 to 110)          | 55.8   | (37.7 to 75.6)       |
|         |         | Female | 1990 | 62      | (40 to 88)           | 42.3   | (27.4 to 59.1)       |
|         |         |        | 2013 | 82      | (56 to 111)          | 44.6   | (30.5 to 60.0)       |
|         |         | Both   | 1990 | 120     | (82 to 159)          | 49.3   | (33.5 to 65.5)       |
|         |         |        | 2013 | 163     | (114 to 214)         | 49.6   | (34.7 to 65.0)       |
| Belarus | Deaths  | Male   | 1990 | 6,347   | (5,372 to 7,403)     | 172.5  | (146.4 to 201.7)     |
|         |         |        | 2013 | 8,576   | (7,112 to 10,406)    | 181.5  | (151.2 to 220.1)     |
|         |         | Female | 1990 | 10,792  | (9,194 to 12,152)    | 141.3  | (120.2 to 158.9)     |
|         |         |        | 2013 | 13,698  | (11,389 to 16,015)   | 135.7  | (114.8 to 158.7)     |
|         |         | Both   | 1990 | 17,139  | (15,306 to 18,819)   | 153.5  | (136.8 to 168.6)     |
|         |         |        | 2013 | 22,275  | (19,715 to 25,496)   | 155.4  | (137.7 to 177.6)     |
|         | DALYs   | Male   | 1990 | 131,809 | (112,051 to 152,475) | 3119.3 | (2649.6 to 3612.2)   |
|         |         |        | 2013 | 177,261 | (145,868 to 219,277) | 3464.2 | (2857.2 to 4255.9)   |
|         |         | Female | 1990 | 161,905 | (137,524 to 181,286) | 2217.7 | (1877.7 to 2482.4)   |
|         |         |        | 2013 | 183,803 | (157,809 to 219,781) | 2068.8 | (1776.0 to 2484.8)   |
|         |         | Both   | 1990 | 293,715 | (264,955 to 320,665) | 2583.1 | (2327.0 to 2827.4)   |
|         |         |        | 2013 | 361,064 | (321,250 to 420,045) | 2655.6 | (2363.1 to 3118.7)   |

|         |         |        |      |         |                      |        |                      |
|---------|---------|--------|------|---------|----------------------|--------|----------------------|
|         | YLDs    | Male   | 1990 | 1,810   | (1,145 to 2,621)     | 40     | (25.7 to 57.1)       |
|         |         |        | 2013 | 2,229   | (1,473 to 3,140)     | 43.2   | (28.8 to 60.1)       |
|         |         | Female | 1990 | 1,790   | (1,165 to 2,570)     | 26.2   | (17.0 to 37.5)       |
|         |         |        | 2013 | 1,968   | (1,225 to 2,799)     | 25.2   | (16.2 to 35.6)       |
|         |         | Both   | 1990 | 3,600   | (2,421 to 4,974)     | 31.8   | (21.3 to 43.8)       |
|         |         |        | 2013 | 4,197   | (2,794 to 5,775)     | 32.6   | (21.6 to 44.7)       |
| Belgium | Deaths  | Male   | 1990 | 4,326   | (3,577 to 5,261)     | 81     | (66.7 to 98.9)       |
|         |         |        | 2013 | 4,321   | (3,399 to 5,278)     | 48.1   | (37.9 to 58.7)       |
|         |         | Female | 1990 | 7,215   | (5,531 to 8,241)     | 73.3   | (56.5 to 83.3)       |
|         |         |        | 2013 | 6,076   | (4,852 to 8,600)     | 40.9   | (33.1 to 57.9)       |
|         |         | Both   | 1990 | 11,542  | (9,743 to 12,887)    | 77     | (65.1 to 86.1)       |
|         |         |        | 2013 | 10,398  | (8,916 to 13,020)    | 44.2   | (38.2 to 54.4)       |
|         | DALYs   | Male   | 1990 | 69,540  | (59,178 to 82,829)   | 1245.4 | (1056.7 to 1481.0)   |
|         |         |        | 2013 | 60,601  | (48,832 to 72,117)   | 724.7  | (586.5 to 861.9)     |
|         |         | Female | 1990 | 84,041  | (66,805 to 95,120)   | 988    | (791.4 to 1127.9)    |
|         |         |        | 2013 | 61,961  | (51,249 to 84,824)   | 533.7  | (442.9 to 728.3)     |
|         |         | Both   | 1990 | 153,581 | (135,080 to 170,423) | 1098.5 | (966.6 to 1221.9)    |
|         |         |        | 2013 | 122,562 | (107,473 to 145,551) | 620.2  | (542.7 to 729.5)     |
|         | YLDs    | Male   | 1990 | 5,864   | (3,987 to 8,039)     | 102.8  | (70.0 to 139.9)      |
|         |         |        | 2013 | 8,322   | (5,676 to 11,456)    | 102.5  | (69.5 to 140.9)      |
|         |         | Female | 1990 | 5,710   | (3,902 to 7,921)     | 72.4   | (49.2 to 99.9)       |
|         |         |        | 2013 | 7,105   | (4,783 to 9,927)     | 68.9   | (47.1 to 93.8)       |
|         |         |        |      |         |                      |        | Uncertainty Interval |
| Country | measure | sex    | year | number  | Uncertainty Interval | Rate   | Interval             |
|         |         | Both   | 1990 | 11,575  | (8,140 to 15,579)    | 84.9   | (59.6 to 114.6)      |
|         |         |        | 2013 | 15,428  | (10,749 to 20,470)   | 84.3   | (58.9 to 111.1)      |
| Belize  | Deaths  | Male   | 1990 | 43      | (35 to 51)           | 111.6  | (91.3 to 132.9)      |
|         |         |        | 2013 | 82      | (63 to 102)          | 120.7  | (93.8 to 149.4)      |
|         |         | Female | 1990 | 46      | (38 to 54)           | 107.6  | (89.8 to 127.6)      |

|       |        |        |      |         |                     |        |                    |
|-------|--------|--------|------|---------|---------------------|--------|--------------------|
|       |        |        | 2013 | 99      | (77 to 128)         | 125.6  | (97.6 to 160.4)    |
|       |        | Both   | 1990 | 89      | (78 to 101)         | 109.7  | (95.7 to 124.5)    |
|       |        |        | 2013 | 182     | (154 to 216)        | 123.7  | (105.5 to 145.5)   |
|       | DALYs  | Male   | 1990 | 957     | (810 to 1,126)      | 1995   | (1660.6 to 2347.9) |
|       |        |        | 2013 | 1,803   | (1,371 to 2,282)    | 2173.1 | (1668.8 to 2720.5) |
|       |        | Female | 1990 | 897     | (736 to 1,037)      | 1804.7 | (1491.4 to 2107.0) |
|       |        |        | 2013 | 1,880   | (1,416 to 2,538)    | 2091   | (1582.6 to 2773.8) |
|       |        | Both   | 1990 | 1,854   | (1,624 to 2,073)    | 1899.2 | (1658.1 to 2135.7) |
|       |        |        | 2013 | 3,683   | (3,041 to 4,463)    | 2134   | (1782.2 to 2554.2) |
|       | YLDs   | Male   | 1990 | 26      | (17 to 36)          | 63.4   | (42.9 to 88.6)     |
|       |        |        | 2013 | 46      | (30 to 62)          | 59     | (39.4 to 80.0)     |
|       |        | Female | 1990 | 18      | (11 to 26)          | 41.2   | (27.0 to 60.3)     |
|       |        |        | 2013 | 36      | (24 to 50)          | 42.1   | (28.0 to 58.3)     |
|       |        | Both   | 1990 | 44      | (30 to 60)          | 51.9   | (36.0 to 71.7)     |
|       |        |        | 2013 | 82      | (56 to 112)         | 50.1   | (34.7 to 67.5)     |
| Benin | Deaths | Male   | 1990 | 951     | (791 to 1,134)      | 127.5  | (104.7 to 152.6)   |
|       |        |        | 2013 | 2,198   | (1,692 to 2,899)    | 160.6  | (126.1 to 208.3)   |
|       |        | Female | 1990 | 1,193   | (966 to 1,488)      | 125.4  | (100.7 to 156.8)   |
|       |        |        | 2013 | 2,258   | (1,658 to 3,043)    | 141.5  | (104.7 to 189.9)   |
|       |        | Both   | 1990 | 2,145   | (1,863 to 2,462)    | 126.8  | (109.4 to 147.5)   |
|       |        |        | 2013 | 4,457   | (3,619 to 5,464)    | 150.6  | (123.9 to 182.9)   |
|       | DALYs  | Male   | 1990 | 27,446  | (22,180 to 33,233)  | 2407.6 | (1996.9 to 2864.3) |
|       |        |        | 2013 | 56,284  | (42,573 to 74,675)  | 2867.3 | (2219.2 to 3766.7) |
|       |        | Female | 1990 | 28,135  | (21,958 to 34,735)  | 2102.6 | (1706.1 to 2613.8) |
|       |        |        | 2013 | 47,171  | (33,707 to 64,582)  | 2239.9 | (1636.6 to 3026.6) |
|       |        | Both   | 1990 | 55,582  | (46,706 to 64,108)  | 2242.7 | (1944.3 to 2569.4) |
|       |        |        | 2013 | 103,456 | (84,480 to 126,846) | 2536.4 | (2063.0 to 3109.7) |
|       | YLDs   | Male   | 1990 | 205     | (130 to 290)        | 19.9   | (12.5 to 28.4)     |

|         |         |        | 2013 | 445    | (288 to 627)         | 19.5   | (12.7 to 27.5)       |
|---------|---------|--------|------|--------|----------------------|--------|----------------------|
|         |         | Female | 1990 | 183    | (118 to 263)         | 13.9   | (8.8 to 20.1)        |
|         |         |        | 2013 | 373    | (238 to 527)         | 14.7   | (9.4 to 20.6)        |
|         |         | Both   | 1990 | 388    | (265 to 525)         | 16.4   | (11.2 to 22.3)       |
|         |         |        | 2013 | 818    | (549 to 1,137)       | 16.9   | (11.2 to 23.2)       |
| Bhutan  | Deaths  | Male   | 1990 | 112    | (69 to 169)          | 124.5  | (79.3 to 176.6)      |
|         |         |        | 2013 | 290    | (187 to 415)         | 143.4  | (95.5 to 199.3)      |
|         |         | Female | 1990 | 109    | (73 to 165)          | 137.4  | (98.0 to 198.3)      |
|         |         |        | 2013 | 252    | (129 to 387)         | 156.3  | (80.5 to 237.0)      |
| Country | measure | sex    | year | number | Uncertainty Interval | Rate   | Uncertainty Interval |
|         |         | Both   | 1990 | 222    | (148 to 330)         | 130.8  | (92.6 to 183.2)      |
|         |         |        | 2013 | 543    | (334 to 797)         | 149.2  | (93.3 to 213.5)      |
|         | DALYs   | Male   | 1990 | 2,951  | (1,817 to 4,582)     | 2225.2 | (1398.3 to 3324.6)   |
|         |         |        | 2013 | 5,738  | (3,469 to 8,771)     | 2340.7 | (1468.9 to 3462.0)   |
|         |         | Female | 1990 | 2,679  | (1,718 to 4,114)     | 2377.7 | (1598.2 to 3601.7)   |
|         |         |        | 2013 | 4,531  | (2,234 to 7,498)     | 2422.5 | (1208.1 to 3926.1)   |
|         |         | Both   | 1990 | 5,630  | (3,666 to 8,562)     | 2298.5 | (1546.0 to 3404.9)   |
|         |         |        | 2013 | 10,269 | (5,998 to 16,008)    | 2376.3 | (1427.2 to 3611.5)   |
|         | YLDs    | Male   | 1990 | 60     | (39 to 85)           | 41.7   | (26.7 to 59.1)       |
|         |         |        | 2013 | 117    | (76 to 165)          | 43.6   | (28.3 to 61.5)       |
|         |         | Female | 1990 | 45     | (30 to 63)           | 37.3   | (24.8 to 51.2)       |
|         |         |        | 2013 | 76     | (51 to 106)          | 36     | (24.0 to 50.6)       |
|         |         | Both   | 1990 | 106    | (71 to 143)          | 39.7   | (26.9 to 53.1)       |
|         |         |        | 2013 | 194    | (131 to 259)         | 40.2   | (27.2 to 54.4)       |
| Bolivia | Deaths  | Male   | 1990 | 1,106  | (901 to 1,316)       | 82.9   | (66.9 to 99.9)       |
|         |         |        | 2013 | 1,617  | (1,202 to 2,158)     | 68.4   | (52.4 to 90.2)       |
|         |         | Female | 1990 | 1,361  | (1,101 to 1,676)     | 88     | (70.4 to 108.7)      |
|         |         |        | 2013 | 2,111  | (1,497 to 2,921)     | 72.7   | (51.5 to 99.6)       |

|                        |         |        |      |        |                      |        |                      |
|------------------------|---------|--------|------|--------|----------------------|--------|----------------------|
|                        |         | Both   | 1990 | 2,467  | (2,144 to 2,858)     | 85.8   | (73.5 to 98.7)       |
|                        |         |        | 2013 | 3,728  | (2,898 to 4,738)     | 70.9   | (55.6 to 89.1)       |
|                        | DALYs   | Male   | 1990 | 36,062 | (28,642 to 44,335)   | 1713.6 | (1392.0 to 2039.3)   |
|                        |         |        | 2013 | 39,039 | (28,290 to 52,831)   | 1224.5 | (895.4 to 1652.8)    |
|                        |         | Female | 1990 | 40,425 | (30,878 to 50,965)   | 1797.4 | (1444.4 to 2231.6)   |
|                        |         |        | 2013 | 44,075 | (30,170 to 61,486)   | 1247.4 | (858.5 to 1746.9)    |
|                        |         | Both   | 1990 | 76,487 | (64,476 to 90,161)   | 1757.8 | (1527.9 to 2038.7)   |
|                        |         |        | 2013 | 83,115 | (64,107 to 106,070)  | 1238.8 | (958.9 to 1576.6)    |
|                        | YLDs    | Male   | 1990 | 388    | (260 to 547)         | 24.4   | (16.5 to 34.3)       |
|                        |         |        | 2013 | 677    | (455 to 924)         | 21.9   | (14.8 to 30.0)       |
|                        |         | Female | 1990 | 220    | (150 to 314)         | 11.9   | (8.2 to 16.9)        |
|                        |         |        | 2013 | 407    | (265 to 566)         | 11.4   | (7.4 to 15.9)        |
|                        |         | Both   | 1990 | 609    | (425 to 837)         | 17.6   | (12.2 to 24.3)       |
|                        |         |        | 2013 | 1,085  | (740 to 1,447)       | 16.2   | (11.2 to 22.0)       |
| Bosnia and Herzegovina | Deaths  | Male   | 1990 | 2,036  | (1,752 to 2,454)     | 173.3  | (148.7 to 208.0)     |
|                        |         |        | 2013 | 3,083  | (2,353 to 3,734)     | 139    | (106.7 to 169.4)     |
|                        |         | Female | 1990 | 2,441  | (2,082 to 2,816)     | 142.4  | (120.9 to 164.7)     |
|                        |         |        | 2013 | 3,476  | (2,659 to 4,115)     | 111.3  | (85.4 to 132.2)      |
|                        |         | Both   | 1990 | 4,477  | (4,103 to 5,087)     | 154.7  | (141.4 to 175.4)     |
|                        |         |        | 2013 | 6,559  | (5,582 to 7,500)     | 123.2  | (104.4 to 141.4)     |
|                        | DALYs   | Male   | 1990 | 39,920 | (34,432 to 48,328)   | 2717.8 | (2350.2 to 3283.3)   |
|                        |         |        | 2013 | 47,315 | (36,276 to 56,775)   | 1980.3 | (1514.2 to 2378.3)   |
|                        |         | Female | 1990 | 39,719 | (34,134 to 45,383)   | 2038.5 | (1752.9 to 2338.4)   |
|                        |         |        | 2013 | 43,750 | (33,630 to 50,855)   | 1394.7 | (1076.1 to 1627.0)   |
|                        |         |        |      |        |                      |        | Uncertainty Interval |
| Country                | measure | sex    | year | number | Uncertainty Interval | Rate   | Interval             |
|                        |         | Both   | 1990 | 79,640 | (73,188 to 90,444)   | 2322.2 | (2133.6 to 2640.8)   |
|                        |         |        | 2013 | 91,065 | (77,389 to 103,574)  | 1656.1 | (1413.4 to 1880.8)   |

|          |        |        |      |        |                    |        |                    |
|----------|--------|--------|------|--------|--------------------|--------|--------------------|
|          | YLDs   | Male   | 1990 | 462    | (297 to 667)       | 25.4   | (16.4 to 36.0)     |
|          |        |        | 2013 | 742    | (495 to 1,057)     | 30.7   | (20.6 to 43.6)     |
|          |        | Female | 1990 | 379    | (255 to 530)       | 17.5   | (11.8 to 24.3)     |
|          |        |        | 2013 | 514    | (334 to 741)       | 18     | (11.8 to 25.7)     |
|          |        | Both   | 1990 | 841    | (574 to 1,146)     | 21     | (14.5 to 28.6)     |
|          |        |        | 2013 | 1,256  | (848 to 1,724)     | 23.9   | (16.2 to 32.9)     |
| Botswana | Deaths | Male   | 1990 | 146    | (96 to 221)        | 99.3   | (68.7 to 143.2)    |
|          |        |        | 2013 | 264    | (176 to 400)       | 86.5   | (59.9 to 128.1)    |
|          |        | Female | 1990 | 215    | (141 to 321)       | 107.9  | (73.7 to 152.5)    |
|          |        |        | 2013 | 203    | (109 to 451)       | 48.3   | (26.6 to 105.5)    |
|          |        | Both   | 1990 | 361    | (259 to 479)       | 105.2  | (78.4 to 136.5)    |
|          |        |        | 2013 | 468    | (331 to 737)       | 63.4   | (45.4 to 100.3)    |
|          | DALYs  | Male   | 1990 | 3,576  | (2,317 to 5,444)   | 1659.3 | (1103.6 to 2510.4) |
|          |        |        | 2013 | 6,216  | (4,100 to 9,345)   | 1416.2 | (942.1 to 2171.7)  |
|          |        | Female | 1990 | 4,211  | (2,653 to 6,633)   | 1599.9 | (1037.3 to 2412.7) |
|          |        |        | 2013 | 3,716  | (2,017 to 7,907)   | 613.3  | (324.0 to 1402.8)  |
|          |        | Both   | 1990 | 7,788  | (5,334 to 10,669)  | 1634   | (1174.1 to 2181.0) |
|          |        |        | 2013 | 9,933  | (7,085 to 14,606)  | 946.3  | (669.0 to 1482.9)  |
|          | YLDs   | Male   | 1990 | 64     | (42 to 88)         | 25     | (16.8 to 34.7)     |
|          |        |        | 2013 | 122    | (78 to 170)        | 24.7   | (15.9 to 34.5)     |
|          |        | Female | 1990 | 71     | (45 to 100)        | 22.2   | (14.5 to 31.2)     |
|          |        |        | 2013 | 131    | (88 to 181)        | 22.3   | (15.1 to 30.3)     |
|          |        | Both   | 1990 | 135    | (90 to 182)        | 23.4   | (16.0 to 31.5)     |
|          |        |        | 2013 | 254    | (172 to 343)       | 23.4   | (16.0 to 31.6)     |
| Brazil   | Deaths | Male   | 1990 | 47,548 | (40,965 to 55,332) | 148.3  | (127.3 to 173.0)   |
|          |        |        | 2013 | 72,206 | (57,918 to 83,513) | 104.2  | (83.3 to 121.2)    |
|          |        | Female | 1990 | 47,039 | (36,977 to 51,000) | 127.1  | (101.1 to 139.6)   |
|          |        |        | 2013 | 71,564 | (62,021 to 90,258) | 79.5   | (68.8 to 100.1)    |

|         |         |        |      |           |                          |        |                    |  |
|---------|---------|--------|------|-----------|--------------------------|--------|--------------------|--|
|         |         | Both   | 1990 | 94,588    | (82,676 to 102,963)      | 137.1  | (119.5 to 149.7)   |  |
|         |         |        | 2013 | 143,771   | (129,078 to 162,465)     | 90.5   | (81.0 to 102.6)    |  |
|         | DALYs   | Male   | 1990 | 1,091,967 | (942,110 to 1,273,336)   | 2718.9 | (2355.6 to 3152.6) |  |
|         |         |        | 2013 | 1,410,563 | (1,131,935 to 1,651,312) | 1786.8 | (1445.1 to 2081.7) |  |
|         |         | Female | 1990 | 980,544   | (762,184 to 1,045,671)   | 2167.8 | (1686.5 to 2328.2) |  |
|         |         |        | 2013 | 1,174,102 | (1,014,386 to 1,500,203) | 1239.9 | (1072.0 to 1580.2) |  |
|         |         | Both   | 1990 | 2,072,511 | (1,815,328 to 2,267,364) | 2426.3 | (2132.4 to 2642.0) |  |
|         |         |        | 2013 | 2,584,666 | (2,287,301 to 2,931,209) | 1488.5 | (1327.8 to 1683.5) |  |
|         | YLDs    | Male   | 1990 | 16,997    | (10,784 to 24,536)       | 42.6   | (27.0 to 61.5)     |  |
|         |         |        |      |           |                          |        | Uncertainty        |  |
| Country | measure | sex    | year | number    | Uncertainty Interval     | Rate   | Interval           |  |
|         |         |        | 2013 | 32,349    | (20,843 to 45,917)       | 40.1   | (25.6 to 56.6)     |  |
|         |         | Female | 1990 | 12,553    | (8,400 to 17,384)        | 27.9   | (18.6 to 39.2)     |  |
|         |         |        | 2013 | 25,107    | (16,578 to 34,604)       | 26.3   | (17.4 to 36.5)     |  |
|         |         | Both   | 1990 | 29,551    | (19,595 to 40,263)       | 34.7   | (22.9 to 47.5)     |  |
|         |         |        | 2013 | 57,457    | (39,551 to 76,339)       | 32.6   | (22.4 to 43.3)     |  |
| Brunei  | Deaths  | Male   | 1990 | 60        | (50 to 70)               | 149.2  | (126.3 to 177.2)   |  |
|         |         |        | 2013 | 84        | (62 to 108)              | 90.5   | (69.3 to 115.7)    |  |
|         |         | Female | 1990 | 57        | (43 to 67)               | 158.3  | (121.0 to 183.6)   |  |
|         |         |        | 2013 | 87        | (67 to 110)              | 89.8   | (70.9 to 114.9)    |  |
|         |         | Both   | 1990 | 118       | (102 to 130)             | 153.8  | (133.6 to 171.5)   |  |
|         |         |        | 2013 | 171       | (143 to 204)             | 90.5   | (76.8 to 108.4)    |  |
|         | DALYs   | Male   | 1990 | 1,385     | (1,169 to 1,606)         | 2608.7 | (2218.4 to 3039.4) |  |
|         |         |        | 2013 | 1,978     | (1,445 to 2,500)         | 1456.2 | (1101.0 to 1842.8) |  |
|         |         | Female | 1990 | 1,202     | (918 to 1,424)           | 2529   | (1945.9 to 2887.5) |  |
|         |         |        | 2013 | 1,708     | (1,315 to 2,170)         | 1277.1 | (1001.4 to 1609.7) |  |



|              |         |        |      |         |                      |        |                      |
|--------------|---------|--------|------|---------|----------------------|--------|----------------------|
|              |         | Both   | 1990 | 2,587   | (2,233 to 2,902)     | 2570.8 | (2249.5 to 2857.7)   |
|              |         |        | 2013 | 3,686   | (3,049 to 4,407)     | 1368.1 | (1149.4 to 1624.0)   |
|              | YLDs    | Male   | 1990 | 65      | (43 to 91)           | 132    | (87.8 to 187.1)      |
|              |         |        | 2013 | 165     | (110 to 239)         | 123.7  | (81.3 to 177.1)      |
|              |         | Female | 1990 | 35      | (23 to 48)           | 77.7   | (52.9 to 106.1)      |
|              |         |        | 2013 | 107     | (73 to 148)          | 81.6   | (54.5 to 111.9)      |
|              |         | Both   | 1990 | 100     | (69 to 137)          | 106    | (73.5 to 145.8)      |
|              |         |        | 2013 | 272     | (186 to 371)         | 102.4  | (70.3 to 140.9)      |
| Bulgaria     | Deaths  | Male   | 1990 | 12,461  | (10,853 to 14,204)   | 271.7  | (236.4 to 310.2)     |
|              |         |        | 2013 | 12,232  | (10,598 to 13,906)   | 224.7  | (194.1 to 256.0)     |
|              |         | Female | 1990 | 14,106  | (12,007 to 15,283)   | 237.2  | (202.3 to 258.5)     |
|              |         |        | 2013 | 14,014  | (12,356 to 16,739)   | 162.3  | (143.9 to 195.1)     |
|              |         | Both   | 1990 | 26,567  | (24,012 to 28,557)   | 253.3  | (228.7 to 272.9)     |
|              |         |        | 2013 | 26,247  | (23,810 to 29,709)   | 189.2  | (171.7 to 214.4)     |
|              | DALYs   | Male   | 1990 | 215,900 | (188,289 to 246,174) | 4333.6 | (3788.2 to 4953.7)   |
|              |         |        | 2013 | 187,795 | (162,812 to 214,727) | 3474.6 | (3005.5 to 3974.8)   |
|              |         | Female | 1990 | 205,673 | (172,014 to 220,136) | 3388.5 | (2825.6 to 3628.6)   |
|              |         |        | 2013 | 164,752 | (147,021 to 200,607) | 2098   | (1871.7 to 2570.3)   |
|              |         | Both   | 1990 | 421,574 | (380,573 to 453,732) | 3834.1 | (3466.0 to 4124.0)   |
|              |         |        | 2013 | 352,548 | (319,254 to 400,227) | 2716.3 | (2454.1 to 3097.1)   |
|              | YLDs    | Male   | 1990 | 1,423   | (915 to 2,015)       | 27.8   | (18.2 to 39.5)       |
|              |         |        | 2013 | 1,570   | (1,045 to 2,249)     | 30.4   | (20.4 to 43.8)       |
|              |         | Female | 1990 | 1,072   | (709 to 1,486)       | 18.3   | (12.2 to 25.3)       |
|              |         |        | 2013 | 1,176   | (778 to 1,683)       | 18.3   | (12.3 to 26.0)       |
|              |         | Both   | 1990 | 2,496   | (1,706 to 3,449)     | 22.8   | (15.6 to 31.2)       |
|              |         |        | 2013 | 2,747   | (1,881 to 3,776)     | 23.9   | (16.3 to 32.7)       |
| Burkina Faso | Deaths  | Male   | 1990 | 791     | (587 to 971)         | 59.3   | (43.6 to 73.5)       |
| Country      | measure | sex    | year | number  | Uncertainty Interval | Rate   | Uncertainty Interval |

|         |        |        |      |        |                     |        |                    |
|---------|--------|--------|------|--------|---------------------|--------|--------------------|
|         |        |        | 2013 | 1,861  | (1,406 to 2,336)    | 103.5  | (77.8 to 128.4)    |
|         |        | Female | 1990 | 966    | (734 to 1,305)      | 56     | (42.1 to 76.3)     |
|         |        |        | 2013 | 2,154  | (1,539 to 2,859)    | 87.2   | (60.2 to 116.6)    |
|         |        | Both   | 1990 | 1,757  | (1,477 to 2,085)    | 57.4   | (48.0 to 68.6)     |
|         |        |        | 2013 | 4,015  | (3,162 to 4,834)    | 93.9   | (73.5 to 113.3)    |
|         | DALYs  | Male   | 1990 | 21,359 | (15,935 to 26,294)  | 1204.5 | (903.0 to 1470.1)  |
|         |        |        | 2013 | 46,403 | (34,809 to 59,272)  | 1854.6 | (1408.1 to 2322.0) |
|         |        | Female | 1990 | 24,435 | (18,485 to 31,999)  | 1093.4 | (837.9 to 1461.6)  |
|         |        |        | 2013 | 47,660 | (34,260 to 64,676)  | 1459.3 | (1041.8 to 1936.0) |
|         |        | Both   | 1990 | 45,794 | (38,313 to 53,865)  | 1140.8 | (954.5 to 1348.4)  |
|         |        |        | 2013 | 94,063 | (73,432 to 113,989) | 1623.6 | (1279.7 to 1949.5) |
|         | YLDs   | Male   | 1990 | 351    | (235 to 492)        | 20.1   | (13.3 to 27.9)     |
|         |        |        | 2013 | 595    | (396 to 846)        | 18.8   | (12.3 to 26.8)     |
|         |        | Female | 1990 | 321    | (207 to 458)        | 14.2   | (9.2 to 20.4)      |
|         |        |        | 2013 | 568    | (376 to 816)        | 14.5   | (9.6 to 21.2)      |
|         |        | Both   | 1990 | 673    | (454 to 928)        | 16.8   | (11.5 to 22.7)     |
|         |        |        | 2013 | 1,164  | (800 to 1,612)      | 16.3   | (11.3 to 22.3)     |
| Burundi | Deaths | Male   | 1990 | 1,874  | (1,260 to 2,615)    | 239.4  | (162.6 to 321.6)   |
|         |        |        | 2013 | 2,253  | (1,653 to 2,862)    | 172.2  | (128.0 to 217.6)   |
|         |        | Female | 1990 | 2,442  | (1,559 to 3,567)    | 249.8  | (162.4 to 364.7)   |
|         |        |        | 2013 | 2,614  | (1,963 to 3,636)    | 186.2  | (138.9 to 254.4)   |
|         |        | Both   | 1990 | 4,317  | (3,274 to 5,780)    | 245.7  | (185.6 to 323.3)   |
|         |        |        | 2013 | 4,868  | (4,070 to 5,982)    | 180.3  | (150.4 to 220.3)   |
|         | DALYs  | Male   | 1990 | 45,641 | (30,977 to 64,638)  | 4542.6 | (3048.8 to 6342.4) |
|         |        |        | 2013 | 53,044 | (38,141 to 68,470)  | 3032.2 | (2227.3 to 3855.8) |
|         |        | Female | 1990 | 54,105 | (32,737 to 80,640)  | 4568.8 | (2873.6 to 6730.4) |
|         |        |        | 2013 | 53,271 | (39,958 to 75,617)  | 3073.6 | (2318.9 to 4280.7) |
|         |        | Both   | 1990 | 99,747 | (74,374 to 134,733) | 4565.1 | (3443.5 to 6101.4) |

|          |         |        | 2013 | 106,315 | (87,306 to 131,464)  | 3063.9 | (2552.1 to 3769.5)   |
|----------|---------|--------|------|---------|----------------------|--------|----------------------|
|          | YLDs    | Male   | 1990 | 163     | (107 to 240)         | 13.6   | (9.0 to 19.9)        |
|          |         |        | 2013 | 297     | (188 to 433)         | 13.2   | (8.3 to 19.0)        |
|          |         | Female | 1990 | 123     | (80 to 178)          | 8.9    | (5.8 to 12.9)        |
|          |         |        | 2013 | 221     | (142 to 317)         | 9.4    | (6.1 to 13.2)        |
|          |         | Both   | 1990 | 287     | (196 to 395)         | 11     | (7.6 to 15.4)        |
|          |         |        | 2013 | 518     | (348 to 714)         | 11.2   | (7.5 to 15.3)        |
| Cambodia | Deaths  | Male   | 1990 | 2,961   | (2,416 to 3,505)     | 213.6  | (174.8 to 252.2)     |
|          |         |        | 2013 | 7,153   | (5,757 to 8,890)     | 188.9  | (152.6 to 234.8)     |
|          |         | Female | 1990 | 3,137   | (2,311 to 3,919)     | 168.7  | (128.7 to 212.2)     |
|          |         |        | 2013 | 9,442   | (7,449 to 11,656)    | 183    | (144.7 to 226.0)     |
|          |         | Both   | 1990 | 6,098   | (5,113 to 7,167)     | 187.8  | (158.5 to 221.5)     |
|          |         |        | 2013 | 16,596  | (14,179 to 19,460)   | 186.1  | (158.5 to 217.6)     |
|          | DALYs   | Male   | 1990 | 90,165  | (72,812 to 109,847)  | 4279.3 | (3489.3 to 5052.2)   |
| Country  | measure | sex    | year | number  | Uncertainty Interval | Rate   | Uncertainty Interval |
|          |         |        | 2013 | 156,913 | (121,054 to 197,403) | 3544.5 | (2795.1 to 4439.2)   |
|          |         | Female | 1990 | 74,497  | (50,492 to 93,485)   | 3070.9 | (2208.5 to 3850.2)   |
|          |         |        | 2013 | 165,311 | (126,631 to 207,488) | 3005.3 | (2320.4 to 3792.6)   |
|          |         | Both   | 1990 | 164,663 | (131,078 to 194,954) | 3614.5 | (3031.2 to 4243.3)   |
|          |         |        | 2013 | 322,225 | (271,887 to 385,018) | 3250.8 | (2752.9 to 3854.4)   |
|          | YLDs    | Male   | 1990 | 772     | (524 to 1,059)       | 47.8   | (32.2 to 65.8)       |
|          |         |        | 2013 | 2,226   | (1,492 to 3,061)     | 55.3   | (37.3 to 77.2)       |
|          |         | Female | 1990 | 840     | (558 to 1,174)       | 39.9   | (25.8 to 56.0)       |
|          |         |        | 2013 | 2,377   | (1,569 to 3,289)     | 44.2   | (28.8 to 61.5)       |
|          |         | Both   | 1990 | 1,613   | (1,141 to 2,159)     | 43.1   | (30.3 to 57.9)       |
|          |         |        | 2013 | 4,604   | (3,161 to 6,205)     | 48.9   | (33.3 to 66.4)       |
| Cameroon | Deaths  | Male   | 1990 | 2,732   | (2,231 to 3,255)     | 134.5  | (108.4 to 160.2)     |
|          |         |        | 2013 | 6,161   | (4,807 to 7,620)     | 176.9  | (138.9 to 217.6)     |

|        |        |        |      |         |                      |        |                    |
|--------|--------|--------|------|---------|----------------------|--------|--------------------|
|        |        | Female | 1990 | 3,738   | (2,982 to 4,898)     | 161    | (126.3 to 212.0)   |
|        |        |        | 2013 | 5,870   | (4,114 to 8,601)     | 153.4  | (108.9 to 219.0)   |
|        |        | Both   | 1990 | 6,471   | (5,505 to 7,652)     | 149.5  | (126.7 to 177.8)   |
|        |        |        | 2013 | 12,032  | (9,982 to 15,108)    | 164.7  | (136.6 to 206.7)   |
|        | DALYs  | Male   | 1990 | 71,063  | (58,208 to 84,950)   | 2456.1 | (2009.7 to 2935.4) |
|        |        |        | 2013 | 153,178 | (117,089 to 190,089) | 3209.2 | (2499.1 to 4005.7) |
|        |        | Female | 1990 | 85,019  | (68,436 to 112,997)  | 2780.1 | (2220.5 to 3645.4) |
|        |        |        | 2013 | 123,381 | (83,026 to 193,776)  | 2493.8 | (1723.3 to 3674.5) |
|        |        | Both   | 1990 | 156,083 | (133,227 to 184,027) | 2636.4 | (2250.8 to 3116.8) |
|        |        |        | 2013 | 276,560 | (226,438 to 356,603) | 2839.3 | (2340.8 to 3571.8) |
|        | YLDs   | Male   | 1990 | 549     | (365 to 769)         | 19.6   | (13.1 to 27.5)     |
|        |        |        | 2013 | 988     | (663 to 1,350)       | 20     | (13.7 to 27.2)     |
|        |        | Female | 1990 | 436     | (285 to 608)         | 14     | (9.1 to 19.7)      |
|        |        |        | 2013 | 766     | (498 to 1,066)       | 14.2   | (9.3 to 19.9)      |
|        |        | Both   | 1990 | 985     | (670 to 1,335)       | 16.6   | (11.4 to 22.6)     |
|        |        |        | 2013 | 1,755   | (1,200 to 2,367)     | 16.9   | (11.6 to 22.6)     |
| Canada | Deaths | Male   | 1990 | 6,364   | (5,180 to 7,843)     | 54.7   | (44.3 to 67.7)     |
|        |        |        | 2013 | 6,720   | (4,714 to 8,383)     | 27.2   | (19.1 to 33.9)     |
|        |        | Female | 1990 | 8,588   | (6,980 to 10,634)    | 47.6   | (38.7 to 58.9)     |
|        |        |        | 2013 | 10,807  | (8,165 to 13,992)    | 29.7   | (22.5 to 38.3)     |
|        |        | Both   | 1990 | 14,952  | (13,190 to 17,597)   | 50.8   | (44.7 to 59.7)     |
|        |        |        | 2013 | 17,528  | (14,128 to 20,918)   | 28.9   | (23.3 to 34.1)     |
|        | DALYs  | Male   | 1990 | 115,732 | (97,264 to 138,906)  | 907.6  | (761.3 to 1094.0)  |
|        |        |        | 2013 | 112,987 | (87,754 to 135,297)  | 471.6  | (368.2 to 565.0)   |
|        |        | Female | 1990 | 117,395 | (102,853 to 143,563) | 694    | (607.5 to 846.3)   |
|        |        |        | 2013 | 129,962 | (108,137 to 158,635) | 433.5  | (357.9 to 526.9)   |
|        |        | Both   | 1990 | 233,128 | (208,580 to 267,210) | 786.5  | (703.5 to 899.9)   |
|        |        |        | 2013 | 242,949 | (203,364 to 280,805) | 451.9  | (378.5 to 525.2)   |

|                          | YLDs    | Male   | 1990 | 19,094 | (12,581 to 26,386)   | 148.1  | (97.1 to 203.2)      |
|--------------------------|---------|--------|------|--------|----------------------|--------|----------------------|
| Country                  | measure | sex    | year | number | Uncertainty Interval | Rate   | Uncertainty Interval |
|                          |         |        | 2013 | 33,135 | (22,215 to 46,569)   | 138.5  | (92.8 to 194.4)      |
|                          |         | Female | 1990 | 18,757 | (11,836 to 27,364)   | 112.6  | (70.9 to 165.3)      |
|                          |         |        | 2013 | 33,604 | (21,717 to 47,935)   | 118.6  | (75.6 to 168.3)      |
|                          |         | Both   | 1990 | 37,851 | (26,649 to 53,016)   | 127.7  | (90.0 to 178.4)      |
|                          |         |        | 2013 | 66,740 | (45,097 to 91,295)   | 127.5  | (86.0 to 174.0)      |
| Cape Verde               | Deaths  | Male   | 1990 | 161    | (141 to 185)         | 216    | (189.1 to 247.6)     |
|                          |         |        | 2013 | 252    | (177 to 349)         | 206.1  | (145.9 to 282.1)     |
|                          |         | Female | 1990 | 175    | (152 to 208)         | 186.7  | (162.7 to 219.6)     |
|                          |         |        | 2013 | 172    | (97 to 362)          | 89.1   | (49.7 to 189.1)      |
|                          |         | Both   | 1990 | 336    | (306 to 379)         | 199.5  | (181.8 to 223.9)     |
|                          |         |        | 2013 | 425    | (298 to 673)         | 136.7  | (95.3 to 216.6)      |
|                          | DALYs   | Male   | 1990 | 3,592  | (3,084 to 4,241)     | 3985.2 | (3481.5 to 4624.4)   |
|                          |         |        | 2013 | 5,014  | (3,381 to 7,132)     | 3561.7 | (2400.1 to 5100.6)   |
|                          |         | Female | 1990 | 2,780  | (2,403 to 3,514)     | 2563.1 | (2238.1 to 3190.3)   |
|                          |         |        | 2013 | 1,986  | (1,059 to 4,560)     | 1075.2 | (558.1 to 2496.0)    |
|                          |         | Both   | 1990 | 6,373  | (5,704 to 7,438)     | 3168.8 | (2866.5 to 3661.0)   |
|                          |         |        | 2013 | 7,001  | (4,684 to 10,986)    | 2147.1 | (1427.8 to 3399.5)   |
|                          | YLDs    | Male   | 1990 | 16     | (11 to 23)           | 19.9   | (13.3 to 28.5)       |
|                          |         |        | 2013 | 28     | (18 to 40)           | 19.2   | (12.5 to 27.1)       |
|                          |         | Female | 1990 | 15     | (10 to 21)           | 14.2   | (9.5 to 19.6)        |
|                          |         |        | 2013 | 27     | (17 to 38)           | 14.7   | (9.5 to 20.4)        |
|                          |         | Both   | 1990 | 32     | (21 to 43)           | 16.7   | (11.4 to 22.7)       |
|                          |         |        | 2013 | 55     | (37 to 76)           | 16.6   | (11.2 to 22.7)       |
| Central African Republic | Deaths  | Male   | 1990 | 970    | (713 to 1,292)       | 171.4  | (128.0 to 224.1)     |
|                          |         |        | 2013 | 787    | (531 to 1,109)       | 99.5   | (66.5 to 138.8)      |

|         |         |        |      |        |                      |        |                      |
|---------|---------|--------|------|--------|----------------------|--------|----------------------|
|         |         | Female | 1990 | 1,519  | (1,005 to 1,890)     | 233.6  | (155.2 to 292.4)     |
|         |         |        | 2013 | 1,997  | (961 to 2,885)       | 201.9  | (98.1 to 286.4)      |
|         |         | Both   | 1990 | 2,490  | (1,866 to 3,067)     | 207.3  | (155.8 to 255.1)     |
|         |         |        | 2013 | 2,785  | (1,671 to 3,706)     | 158.8  | (94.7 to 210.2)      |
|         | DALYs   | Male   | 1990 | 24,912 | (18,022 to 33,885)   | 3417.6 | (2498.9 to 4603.3)   |
|         |         |        | 2013 | 18,718 | (12,674 to 26,324)   | 1822.5 | (1231.1 to 2588.0)   |
|         |         | Female | 1990 | 33,877 | (22,102 to 42,530)   | 4191.8 | (2751.6 to 5238.0)   |
|         |         |        | 2013 | 41,917 | (19,999 to 62,737)   | 3460.6 | (1658.0 to 5075.0)   |
|         |         | Both   | 1990 | 58,789 | (43,217 to 73,623)   | 3854.8 | (2859.8 to 4791.6)   |
|         |         |        | 2013 | 60,635 | (36,749 to 81,849)   | 2740.1 | (1646.5 to 3655.0)   |
|         | YLDs    | Male   | 1990 | 136    | (93 to 188)          | 18.5   | (12.6 to 25.5)       |
|         |         |        | 2013 | 198    | (124 to 277)         | 17.6   | (11.2 to 24.2)       |
|         |         | Female | 1990 | 115    | (75 to 160)          | 13.5   | (8.9 to 18.9)        |
|         |         |        | 2013 | 179    | (116 to 250)         | 13.9   | (8.9 to 19.6)        |
|         |         | Both   | 1990 | 251    | (175 to 342)         | 15.8   | (11.1 to 21.3)       |
|         |         |        | 2013 | 377    | (255 to 513)         | 15.6   | (10.5 to 21.3)       |
| Chad    | Deaths  | Male   | 1990 | 748    | (572 to 944)         | 80     | (60.4 to 101.4)      |
|         |         |        |      |        |                      |        | Uncertainty Interval |
| Country | measure | sex    | year | number | Uncertainty Interval | Rate   | Interval             |
|         |         |        | 2013 | 1,394  | (983 to 1,929)       | 87.9   | (61.7 to 119.7)      |
|         |         | Female | 1990 | 1,093  | (763 to 1,358)       | 102.9  | (72.8 to 129.6)      |
|         |         |        | 2013 | 1,946  | (1,251 to 2,794)     | 112    | (72.7 to 158.3)      |
|         |         | Both   | 1990 | 1,841  | (1,456 to 2,221)     | 93.1   | (73.0 to 112.8)      |
|         |         |        | 2013 | 3,341  | (2,480 to 4,340)     | 101.5  | (74.9 to 131.8)      |
|         | DALYs   | Male   | 1990 | 21,223 | (16,307 to 27,010)   | 1481.7 | (1134.8 to 1864.4)   |
|         |         |        | 2013 | 37,478 | (26,421 to 52,347)   | 1577   | (1113.8 to 2189.1)   |
|         |         | Female | 1990 | 26,763 | (18,583 to 33,655)   | 1769.1 | (1226.6 to 2201.7)   |
|         |         |        | 2013 | 45,448 | (29,800 to 66,017)   | 1846   | (1170.8 to 2664.6)   |
|         |         | Both   | 1990 | 47,987 | (37,588 to 57,887)   | 1642.2 | (1293.6 to 1978.0)   |

|       |        |        |      |           |                        |        |                    |
|-------|--------|--------|------|-----------|------------------------|--------|--------------------|
|       |        |        | 2013 | 82,927    | (62,172 to 108,320)    | 1725.3 | (1278.9 to 2259.7) |
|       | YLDs   | Male   | 1990 | 251       | (161 to 351)           | 19.3   | (12.5 to 27.0)     |
|       |        |        | 2013 | 464       | (304 to 648)           | 19.1   | (12.4 to 27.5)     |
|       |        | Female | 1990 | 198       | (128 to 281)           | 13.7   | (8.8 to 19.7)      |
|       |        |        | 2013 | 356       | (240 to 488)           | 13.3   | (8.9 to 18.2)      |
|       |        | Both   | 1990 | 450       | (307 to 619)           | 16.3   | (11.1 to 22.4)     |
|       |        |        | 2013 | 821       | (563 to 1,113)         | 16     | (11.1 to 21.9)     |
| Chile | Deaths | Male   | 1990 | 3,879     | (3,344 to 4,739)       | 118.7  | (101.5 to 146.6)   |
|       |        |        | 2013 | 5,454     | (4,444 to 6,415)       | 72.9   | (59.0 to 85.9)     |
|       |        | Female | 1990 | 4,296     | (3,566 to 5,164)       | 91.1   | (75.4 to 109.6)    |
|       |        |        | 2013 | 5,778     | (4,809 to 7,635)       | 53.4   | (44.6 to 70.7)     |
|       |        | Both   | 1990 | 8,175     | (7,390 to 9,362)       | 102.7  | (92.7 to 118.0)    |
|       |        |        | 2013 | 11,233    | (9,745 to 13,062)      | 62     | (53.7 to 72.1)     |
|       | DALYs  | Male   | 1990 | 75,278    | (65,031 to 90,302)     | 1965.2 | (1706.3 to 2385.3) |
|       |        |        | 2013 | 92,460    | (76,394 to 107,372)    | 1125.5 | (931.2 to 1306.6)  |
|       |        | Female | 1990 | 68,995    | (57,838 to 81,785)     | 1384.7 | (1157.9 to 1638.1) |
|       |        |        | 2013 | 74,367    | (62,664 to 96,860)     | 725.7  | (613.5 to 944.2)   |
|       |        | Both   | 1990 | 144,274   | (132,281 to 164,509)   | 1634.5 | (1496.3 to 1864.8) |
|       |        |        | 2013 | 166,827   | (146,818 to 190,513)   | 906.6  | (797.2 to 1033.2)  |
|       | YLDs   | Male   | 1990 | 1,879     | (1,273 to 2,513)       | 45.5   | (31.2 to 60.7)     |
|       |        |        | 2013 | 3,715     | (2,479 to 4,999)       | 43.5   | (29.1 to 59.2)     |
|       |        | Female | 1990 | 1,315     | (869 to 1,843)         | 25.6   | (16.9 to 35.9)     |
|       |        |        | 2013 | 2,473     | (1,604 to 3,470)       | 24.7   | (16.1 to 34.5)     |
|       |        | Both   | 1990 | 3,195     | (2,173 to 4,247)       | 34.3   | (23.3 to 46.0)     |
|       |        |        | 2013 | 6,189     | (4,227 to 8,161)       | 33.3   | (22.7 to 44.1)     |
| China | Deaths | Male   | 1990 | 702,451   | (601,130 to 780,076)   | 233.5  | (201.4 to 258.2)   |
|       |        |        | 2013 | 1,110,238 | (928,780 to 1,356,982) | 188.9  | (159.3 to 231.0)   |
|       |        | Female | 1990 | 603,603   | (533,293 to 728,820)   | 171.6  | (151.8 to 207.0)   |

|          |         |        | 2013 | 810,449    | (692,117 to 924,961)       | 127.5  | (109.3 to 145.9)     |
|----------|---------|--------|------|------------|----------------------------|--------|----------------------|
|          |         | Both   | 1990 | 1,306,054  | (1,191,710 to 1,436,929)   | 199.7  | (182.7 to 219.6)     |
|          |         |        | 2013 | 1,920,688  | (1,715,665 to 2,196,206)   | 157.3  | (141.9 to 180.1)     |
| Country  | measure | sex    | year | number     | Uncertainty Interval       | Rate   | Uncertainty Interval |
|          | DALYs   | Male   | 1990 | 15,810,086 | (13,579,956 to 17,802,632) | 4149   | (3572.2 to 4615.2)   |
|          |         |        | 2013 | 20,778,030 | (17,184,678 to 25,034,999) | 3032.6 | (2520.0 to 3665.7)   |
|          |         | Female | 1990 | 11,510,587 | (10,042,789 to 14,058,890) | 2913.5 | (2561.1 to 3527.9)   |
|          |         |        | 2013 | 11,917,010 | (10,010,331 to 13,848,970) | 1725   | (1457.2 to 1990.0)   |
|          |         | Both   | 1990 | 27,320,673 | (24,692,698 to 30,335,280) | 3508.5 | (3191.6 to 3863.1)   |
|          |         |        | 2013 | 32,695,040 | (28,591,270 to 37,613,155) | 2371.7 | (2086.1 to 2711.6)   |
|          | YLDs    | Male   | 1990 | 219,111    | (154,730 to 284,153)       | 62.5   | (44.2 to 81.2)       |
|          |         |        | 2013 | 429,633    | (304,101 to 554,874)       | 63.7   | (45.3 to 82.1)       |
|          |         | Female | 1990 | 154,071    | (110,120 to 199,469)       | 39.9   | (28.6 to 51.5)       |
|          |         |        | 2013 | 277,731    | (195,371 to 361,615)       | 39.5   | (27.9 to 51.3)       |
|          |         | Both   | 1990 | 373,182    | (265,035 to 482,793)       | 50.2   | (35.8 to 64.9)       |
|          |         |        | 2013 | 707,364    | (500,459 to 917,801)       | 51.2   | (36.2 to 66.3)       |
| Colombia | Deaths  | Male   | 1990 | 6,174      | (5,249 to 7,343)           | 97.1   | (82.2 to 115.8)      |
|          |         |        | 2013 | 9,759      | (7,653 to 12,326)          | 74.1   | (58.4 to 93.6)       |
|          |         | Female | 1990 | 7,203      | (5,965 to 8,350)           | 91.1   | (75.0 to 105.3)      |
|          |         |        | 2013 | 11,013     | (8,829 to 14,113)          | 63.9   | (51.0 to 81.5)       |
|          |         | Both   | 1990 | 13,378     | (12,045 to 14,943)         | 93.9   | (83.9 to 105.2)      |
|          |         |        | 2013 | 20,772     | (17,642 to 24,710)         | 68.5   | (58.4 to 81.4)       |



|         |         |        |      |         |                      |        |                      |
|---------|---------|--------|------|---------|----------------------|--------|----------------------|
|         | DALYs   | Male   | 1990 | 141,161 | (120,617 to 168,007) | 1719.5 | (1467.9 to 2053.7)   |
|         |         |        | 2013 | 189,739 | (147,680 to 241,985) | 1179.4 | (927.8 to 1494.7)    |
|         |         | Female | 1990 | 149,913 | (123,858 to 172,483) | 1558.4 | (1288.0 to 1795.7)   |
|         |         |        | 2013 | 180,681 | (142,046 to 235,113) | 932.3  | (736.2 to 1201.9)    |
|         |         | Both   | 1990 | 291,075 | (261,360 to 325,824) | 1630.5 | (1473.1 to 1824.1)   |
|         |         |        | 2013 | 370,420 | (310,561 to 441,831) | 1043.5 | (882.4 to 1245.6)    |
|         | YLDs    | Male   | 1990 | 2,148   | (1,458 to 2,918)     | 26.2   | (17.9 to 35.8)       |
|         |         |        | 2013 | 4,726   | (3,156 to 6,646)     | 27.6   | (18.7 to 38.5)       |
|         |         | Female | 1990 | 1,726   | (1,178 to 2,331)     | 18.3   | (12.5 to 24.7)       |
|         |         |        | 2013 | 3,744   | (2,434 to 5,188)     | 18.4   | (12.0 to 25.6)       |
|         |         | Both   | 1990 | 3,874   | (2,661 to 5,093)     | 21.9   | (15.1 to 28.9)       |
|         |         |        | 2013 | 8,471   | (5,832 to 11,629)    | 22.5   | (15.5 to 30.5)       |
| Comoros | Deaths  | Male   | 1990 | 154     | (99 to 230)          | 251.9  | (171.2 to 362.2)     |
|         |         |        | 2013 | 248     | (162 to 345)         | 230.5  | (160.5 to 304.7)     |
|         |         | Female | 1990 | 187     | (114 to 273)         | 259.7  | (165.5 to 365.7)     |
|         |         |        | 2013 | 248     | (166 to 354)         | 210.3  | (142.7 to 294.3)     |
|         |         | Both   | 1990 | 342     | (240 to 457)         | 257.3  | (187.5 to 335.2)     |
|         |         |        | 2013 | 496     | (371 to 635)         | 220.4  | (168.4 to 277.2)     |
|         | DALYs   | Male   | 1990 | 3,783   | (2,416 to 5,768)     | 4637.6 | (2989.8 to 6936.4)   |
|         |         |        | 2013 | 5,978   | (3,716 to 8,640)     | 4136.1 | (2705.4 to 5747.1)   |
|         |         |        |      |         |                      |        | Uncertainty Interval |
| Country | measure | sex    | year | number  | Uncertainty Interval | Rate   | Interval             |
|         |         | Female | 1990 | 3,990   | (2,351 to 6,040)     | 4472.9 | (2710.0 to 6620.8)   |
|         |         |        | 2013 | 5,020   | (3,161 to 7,438)     | 3428.8 | (2261.5 to 4925.4)   |
|         |         | Both   | 1990 | 7,774   | (5,310 to 10,586)    | 4567.3 | (3190.2 to 6149.8)   |
|         |         |        | 2013 | 10,999  | (7,953 to 14,486)    | 3776.6 | (2808.5 to 4864.2)   |
|         | YLDs    | Male   | 1990 | 12      | (7 to 18)            | 12.8   | (8.0 to 18.5)        |
|         |         |        | 2013 | 25      | (15 to 36)           | 13.8   | (9.2 to 20.1)        |
|         |         | Female | 1990 | 9       | (5 to 13)            | 8.8    | (5.7 to 12.7)        |

|            |        |        |      |        |                     |        |                    |
|------------|--------|--------|------|--------|---------------------|--------|--------------------|
|            |        |        | 2013 | 18     | (11 to 27)          | 9.5    | (6.1 to 14.0)      |
|            |        | Both   | 1990 | 21     | (14 to 29)          | 10.7   | (7.2 to 14.7)      |
|            |        |        | 2013 | 43     | (27 to 61)          | 11.5   | (7.6 to 16.4)      |
| Congo      | Deaths | Male   | 1990 | 1,284  | (1,063 to 1,527)    | 298.6  | (247.1 to 349.2)   |
|            |        |        | 2013 | 1,964  | (1,473 to 2,457)    | 261.6  | (200.8 to 322.3)   |
|            |        | Female | 1990 | 1,467  | (1,150 to 1,785)    | 310    | (248.9 to 376.0)   |
|            |        |        | 2013 | 1,962  | (1,464 to 2,641)    | 245.5  | (184.4 to 325.2)   |
|            |        | Both   | 1990 | 2,751  | (2,367 to 3,163)    | 306    | (263.9 to 349.8)   |
|            |        |        | 2013 | 3,927  | (3,209 to 4,735)    | 254.2  | (207.9 to 304.6)   |
|            | DALYs  | Male   | 1990 | 30,883 | (25,113 to 37,473)  | 5731.3 | (4695.5 to 6880.7) |
|            |        |        | 2013 | 47,115 | (34,543 to 60,346)  | 4843.1 | (3602.4 to 6081.5) |
|            |        | Female | 1990 | 30,557 | (22,408 to 38,071)  | 5370.7 | (4120.5 to 6630.9) |
|            |        |        | 2013 | 38,462 | (28,014 to 54,307)  | 3955.8 | (2922.8 to 5417.7) |
|            |        | Both   | 1990 | 61,441 | (51,814 to 71,813)  | 5559.3 | (4763.7 to 6446.6) |
|            |        |        | 2013 | 85,577 | (68,931 to 103,445) | 4396.6 | (3583.1 to 5283.2) |
|            | YLDs   | Male   | 1990 | 106    | (69 to 146)         | 18.5   | (12.1 to 25.8)     |
|            |        |        | 2013 | 188    | (127 to 269)        | 17.5   | (11.6 to 24.9)     |
|            |        | Female | 1990 | 87     | (57 to 123)         | 13.9   | (9.1 to 19.3)      |
|            |        |        | 2013 | 156    | (104 to 223)        | 13.6   | (8.9 to 19.4)      |
|            |        | Both   | 1990 | 194    | (133 to 260)        | 16.1   | (11.0 to 21.7)     |
|            |        |        | 2013 | 344    | (238 to 472)        | 15.4   | (10.6 to 21.1)     |
| Costa Rica | Deaths | Male   | 1990 | 413    | (343 to 504)        | 59.1   | (48.8 to 72.6)     |
|            |        |        | 2013 | 707    | (556 to 858)        | 42.8   | (33.3 to 52.0)     |
|            |        | Female | 1990 | 483    | (395 to 575)        | 61     | (49.8 to 73.1)     |
|            |        |        | 2013 | 776    | (622 to 1,009)      | 39.1   | (31.2 to 50.7)     |
|            |        | Both   | 1990 | 897    | (795 to 1,022)      | 60.2   | (53.1 to 69.2)     |
|            |        |        | 2013 | 1,483  | (1,286 to 1,744)    | 40.9   | (35.4 to 48.2)     |
|            | DALYs  | Male   | 1990 | 7,344  | (6,264 to 8,926)    | 877.7  | (741.7 to 1068.0)  |

|               |         |        | 2013 | 11,449  | (9,267 to 13,693)    | 605.3  | (487.4 to 721.1)     |
|---------------|---------|--------|------|---------|----------------------|--------|----------------------|
|               |         | Female | 1990 | 7,599   | (6,120 to 8,860)     | 857.9  | (694.7 to 1003.9)    |
|               |         |        | 2013 | 10,158  | (8,443 to 12,864)    | 491.7  | (408.0 to 621.3)     |
|               |         | Both   | 1990 | 14,943  | (13,232 to 16,900)   | 867.8  | (773.7 to 982.0)     |
|               |         |        | 2013 | 21,608  | (18,925 to 24,939)   | 546.3  | (478.7 to 630.3)     |
|               | YLDs    | Male   | 1990 | 240     | (162 to 330)         | 27.4   | (18.1 to 37.7)       |
|               |         |        | 2013 | 565     | (375 to 788)         | 27.8   | (18.4 to 38.4)       |
| Country       | measure | sex    | year | number  | Uncertainty Interval | Rate   | Uncertainty Interval |
|               |         | Female | 1990 | 167     | (111 to 230)         | 18.5   | (12.3 to 25.3)       |
|               |         |        | 2013 | 395     | (259 to 555)         | 18.6   | (12.1 to 26.5)       |
|               |         | Both   | 1990 | 408     | (279 to 549)         | 22.8   | (15.5 to 30.7)       |
|               |         |        | 2013 | 960     | (667 to 1,265)       | 23.1   | (16.0 to 30.3)       |
| Cote d'Ivoire | Deaths  | Male   | 1990 | 3,636   | (3,055 to 4,313)     | 169.9  | (142.6 to 198.6)     |
|               |         |        | 2013 | 6,660   | (5,321 to 8,549)     | 181.7  | (147.0 to 226.1)     |
|               |         | Female | 1990 | 2,672   | (1,874 to 3,501)     | 158.1  | (112.6 to 209.9)     |
|               |         |        | 2013 | 4,986   | (3,720 to 6,950)     | 177.3  | (135.7 to 245.9)     |
|               |         | Both   | 1990 | 6,308   | (5,385 to 7,450)     | 165    | (141.5 to 194.3)     |
|               |         |        | 2013 | 11,646  | (9,791 to 14,274)    | 179.9  | (152.6 to 217.8)     |
|               | DALYs   | Male   | 1990 | 104,862 | (86,709 to 125,638)  | 3290.7 | (2763.4 to 3908.2)   |
|               |         |        | 2013 | 171,309 | (135,603 to 223,340) | 3354.6 | (2690.8 to 4306.8)   |
|               |         | Female | 1990 | 68,800  | (45,589 to 90,167)   | 2721.1 | (1918.7 to 3566.1)   |
|               |         |        | 2013 | 118,157 | (86,757 to 169,363)  | 2918.7 | (2181.4 to 4062.9)   |
|               |         | Both   | 1990 | 173,662 | (146,841 to 205,047) | 3037   | (2599.5 to 3573.9)   |
|               |         |        | 2013 | 289,466 | (242,633 to 355,879) | 3153.2 | (2650.7 to 3862.8)   |
|               | YLDs    | Male   | 1990 | 617     | (402 to 861)         | 19.6   | (13.1 to 27.5)       |
|               |         |        | 2013 | 1,010   | (647 to 1,470)       | 18.6   | (11.7 to 27.5)       |
|               |         | Female | 1990 | 377     | (247 to 519)         | 14.5   | (9.8 to 19.7)        |
|               |         |        | 2013 | 680     | (445 to 958)         | 14.3   | (9.4 to 20.3)        |

|         |         |        |      |         |                      |        |                      |
|---------|---------|--------|------|---------|----------------------|--------|----------------------|
|         |         | Both   | 1990 | 995     | (665 to 1,355)       | 17.3   | (11.8 to 23.3)       |
|         |         |        | 2013 | 1,690   | (1,135 to 2,336)     | 16.6   | (11.0 to 23.0)       |
| Croatia | Deaths  | Male   | 1990 | 4,105   | (3,605 to 4,740)     | 206.8  | (181.0 to 239.2)     |
|         |         |        | 2013 | 3,584   | (3,022 to 4,129)     | 119.9  | (100.6 to 138.7)     |
|         |         | Female | 1990 | 5,488   | (4,533 to 6,261)     | 160.3  | (132.7 to 183.2)     |
|         |         |        | 2013 | 4,874   | (4,177 to 5,898)     | 90.6   | (78.1 to 110.0)      |
|         |         | Both   | 1990 | 9,594   | (8,569 to 10,554)    | 178.5  | (159.5 to 197.0)     |
|         |         |        | 2013 | 8,458   | (7,592 to 9,481)     | 103    | (92.8 to 115.5)      |
|         | DALYs   | Male   | 1990 | 73,704  | (64,134 to 85,154)   | 3281.8 | (2869.7 to 3787.2)   |
|         |         |        | 2013 | 52,990  | (44,466 to 61,104)   | 1743.6 | (1465.5 to 2011.0)   |
|         |         | Female | 1990 | 76,323  | (63,254 to 85,234)   | 2253.9 | (1871.4 to 2525.8)   |
|         |         |        | 2013 | 51,196  | (44,775 to 62,399)   | 1092.8 | (957.5 to 1348.8)    |
|         |         | Both   | 1990 | 150,027 | (135,092 to 163,488) | 2682.6 | (2416.1 to 2923.8)   |
|         |         |        | 2013 | 104,186 | (94,655 to 116,843)  | 1376.6 | (1253.0 to 1546.6)   |
|         | YLDs    | Male   | 1990 | 756     | (498 to 1,106)       | 30.7   | (20.3 to 44.4)       |
|         |         |        | 2013 | 921     | (625 to 1,314)       | 31.4   | (21.4 to 44.6)       |
|         |         | Female | 1990 | 635     | (407 to 904)         | 19.6   | (12.8 to 27.5)       |
|         |         |        | 2013 | 733     | (476 to 1,047)       | 19.3   | (12.4 to 27.3)       |
|         |         | Both   | 1990 | 1,392   | (939 to 1,922)       | 24.4   | (16.5 to 33.7)       |
|         |         |        | 2013 | 1,655   | (1,135 to 2,262)     | 24.9   | (17.1 to 33.8)       |
| Cuba    | Deaths  | Male   | 1990 | 4,288   | (3,601 to 5,207)     | 96.6   | (81.1 to 117.1)      |
|         |         |        | 2013 | 5,383   | (4,320 to 6,535)     | 77.5   | (62.1 to 94.1)       |
|         |         |        |      |         |                      |        | Uncertainty Interval |
| Country | measure | sex    | year | number  | Uncertainty Interval | Rate   | Interval             |
|         |         | Female | 1990 | 4,810   | (4,164 to 5,946)     | 96.4   | (83.4 to 119.1)      |
|         |         |        | 2013 | 6,029   | (4,363 to 7,160)     | 69.9   | (50.6 to 82.8)       |
|         |         | Both   | 1990 | 9,098   | (8,191 to 10,628)    | 96.5   | (86.9 to 112.8)      |
|         |         |        | 2013 | 11,413  | (9,407 to 13,036)    | 73.8   | (61.0 to 84.2)       |
|         | DALYs   | Male   | 1990 | 73,700  | (62,947 to 89,232)   | 1636.6 | (1398.0 to 1976.2)   |

|        |        |        |      |         |                      |        |                    |
|--------|--------|--------|------|---------|----------------------|--------|--------------------|
|        |        |        | 2013 | 86,053  | (70,665 to 103,639)  | 1214.8 | (997.9 to 1461.9)  |
|        |        | Female | 1990 | 74,808  | (64,821 to 90,810)   | 1541.6 | (1335.0 to 1868.3) |
|        |        |        | 2013 | 76,606  | (57,320 to 89,596)   | 951.3  | (711.6 to 1112.4)  |
|        |        | Both   | 1990 | 148,509 | (135,422 to 170,210) | 1587.5 | (1449.0 to 1821.2) |
|        |        |        | 2013 | 162,660 | (138,275 to 184,124) | 1080.2 | (919.1 to 1226.6)  |
|        | YLDs   | Male   | 1990 | 2,647   | (1,709 to 3,712)     | 59.2   | (38.0 to 83.1)     |
|        |        |        | 2013 | 3,960   | (2,669 to 5,574)     | 56.4   | (38.1 to 79.3)     |
|        |        | Female | 1990 | 2,028   | (1,350 to 2,816)     | 41.5   | (27.8 to 57.4)     |
|        |        |        | 2013 | 3,417   | (2,262 to 4,792)     | 43.1   | (28.8 to 60.1)     |
|        |        | Both   | 1990 | 4,675   | (3,167 to 6,295)     | 50     | (33.9 to 67.4)     |
|        |        |        | 2013 | 7,377   | (5,060 to 10,082)    | 49.5   | (34.0 to 67.6)     |
| Cyprus | Deaths | Male   | 1990 | 351     | (245 to 430)         | 114.8  | (80.2 to 140.4)    |
|        |        |        | 2013 | 240     | (193 to 299)         | 43.8   | (35.4 to 54.5)     |
|        |        | Female | 1990 | 420     | (252 to 508)         | 109    | (66.1 to 131.3)    |
|        |        |        | 2013 | 320     | (265 to 432)         | 41.8   | (35.0 to 55.9)     |
|        |        | Both   | 1990 | 772     | (538 to 903)         | 112.1  | (78.7 to 130.8)    |
|        |        |        | 2013 | 560     | (486 to 690)         | 43     | (37.4 to 52.7)     |
|        | DALYs  | Male   | 1990 | 5,373   | (3,917 to 6,352)     | 1748   | (1275.8 to 2065.4) |
|        |        |        | 2013 | 3,569   | (2,987 to 4,338)     | 676.5  | (566.6 to 818.7)   |
|        |        | Female | 1990 | 5,146   | (3,440 to 5,976)     | 1434.3 | (968.8 to 1658.4)  |
|        |        |        | 2013 | 3,386   | (2,871 to 4,354)     | 518.6  | (440.0 to 669.6)   |
|        |        | Both   | 1990 | 10,519  | (7,797 to 11,947)    | 1583   | (1176.3 to 1794.7) |
|        |        |        | 2013 | 6,955   | (6,136 to 8,110)     | 593.4  | (524.6 to 690.4)   |
|        | YLDs   | Male   | 1990 | 331     | (224 to 451)         | 108.1  | (73.2 to 147.4)    |
|        |        |        | 2013 | 575     | (374 to 802)         | 106.8  | (69.5 to 148.9)    |
|        |        | Female | 1990 | 248     | (164 to 340)         | 70.7   | (47.2 to 96.5)     |
|        |        |        | 2013 | 461     | (304 to 663)         | 73     | (48.0 to 104.8)    |
|        |        | Both   | 1990 | 580     | (402 to 769)         | 88.1   | (61.2 to 116.8)    |

|                                  |         |        | 2013 | 1,036   | (722 to 1,397)       | 88.8   | (62.1 to 119.1)      |
|----------------------------------|---------|--------|------|---------|----------------------|--------|----------------------|
| Czech Republic                   | Deaths  | Male   | 1990 | 11,062  | (9,724 to 12,982)    | 255.4  | (224.9 to 296.2)     |
|                                  |         |        | 2013 | 7,443   | (6,370 to 8,728)     | 112.3  | (96.3 to 131.7)      |
|                                  |         | Female | 1990 | 15,755  | (12,751 to 17,085)   | 196.9  | (158.6 to 213.1)     |
|                                  |         |        | 2013 | 10,038  | (8,622 to 13,775)    | 86     | (74.2 to 117.7)      |
|                                  |         | Both   | 1990 | 26,818  | (23,824 to 28,977)   | 219.6  | (195.5 to 237.0)     |
|                                  |         |        | 2013 | 17,481  | (15,530 to 21,570)   | 97     | (86.3 to 119.2)      |
|                                  | DALYs   | Male   | 1990 | 176,886 | (153,703 to 210,305) | 3714   | (3267.5 to 4372.5)   |
|                                  |         |        | 2013 | 101,687 | (85,889 to 118,132)  | 1462.4 | (1235.5 to 1695.2)   |
| Country                          | measure | sex    | year | number  | Uncertainty Interval | Rate   | Uncertainty Interval |
|                                  |         | Female | 1990 | 195,251 | (154,449 to 209,743) | 2540.1 | (1991.3 to 2725.0)   |
|                                  |         |        | 2013 | 99,531  | (86,158 to 135,408)  | 946.4  | (825.9 to 1280.2)    |
|                                  |         | Both   | 1990 | 372,138 | (330,730 to 404,343) | 3022.5 | (2692.0 to 3284.6)   |
|                                  |         |        | 2013 | 201,219 | (179,845 to 240,077) | 1172   | (1049.3 to 1390.3)   |
|                                  | YLDs    | Male   | 1990 | 1,454   | (949 to 2,058)       | 28     | (18.3 to 39.6)       |
|                                  |         |        | 2013 | 2,202   | (1,448 to 3,049)     | 31     | (20.3 to 42.9)       |
|                                  |         | Female | 1990 | 1,300   | (829 to 1,849)       | 19.1   | (12.2 to 27.0)       |
|                                  |         |        | 2013 | 1,571   | (1,042 to 2,200)     | 18.6   | (12.1 to 25.8)       |
|                                  |         | Both   | 1990 | 2,755   | (1,862 to 3,794)     | 23     | (15.5 to 31.5)       |
|                                  |         |        | 2013 | 3,774   | (2,578 to 5,137)     | 24.3   | (16.7 to 32.9)       |
| Democratic Republic of the Congo | Deaths  | Male   | 1990 | 7,704   | (5,991 to 9,793)     | 153.6  | (119.3 to 196.1)     |
|                                  |         |        | 2013 | 17,909  | (13,028 to 23,154)   | 186.6  | (137.7 to 237.3)     |
|                                  |         | Female | 1990 | 13,105  | (10,038 to 16,685)   | 217    | (167.3 to 270.9)     |
|                                  |         |        | 2013 | 21,377  | (15,287 to 28,073)   | 199.8  | (146.0 to 261.1)     |
|                                  |         | Both   | 1990 | 20,809  | (17,049 to 24,526)   | 191.8  | (159.3 to 225.5)     |
|                                  |         |        | 2013 | 39,287  | (31,578 to 47,382)   | 195.2  | (158.6 to 232.8)     |

|         |         |        |      |         |                        |        |                      |
|---------|---------|--------|------|---------|------------------------|--------|----------------------|
|         | DALYs   | Male   | 1990 | 225,844 | (176,320 to 287,309)   | 2913.3 | (2254.1 to 3714.7)   |
|         |         |        | 2013 | 485,999 | (352,969 to 634,975)   | 3522.1 | (2554.9 to 4575.3)   |
|         |         | Female | 1990 | 316,654 | (233,321 to 411,657)   | 3791.4 | (2900.6 to 4848.8)   |
|         |         |        | 2013 | 490,625 | (349,471 to 667,171)   | 3392.1 | (2409.0 to 4474.6)   |
|         |         | Both   | 1990 | 542,499 | (439,545 to 647,560)   | 3429.8 | (2812.9 to 4040.5)   |
|         |         |        | 2013 | 976,625 | (775,563 to 1,188,990) | 3471.8 | (2782.5 to 4201.2)   |
|         | YLDs    | Male   | 1990 | 1,340   | (848 to 1,911)         | 17.8   | (11.5 to 25.7)       |
|         |         |        | 2013 | 2,593   | (1,713 to 3,608)       | 17.7   | (11.7 to 24.5)       |
|         |         | Female | 1990 | 1,145   | (734 to 1,614)         | 13.1   | (8.5 to 18.5)        |
|         |         |        | 2013 | 2,151   | (1,411 to 3,074)       | 13.5   | (8.8 to 19.6)        |
|         |         | Both   | 1990 | 2,486   | (1,643 to 3,406)       | 15.2   | (10.0 to 20.7)       |
|         |         |        | 2013 | 4,745   | (3,219 to 6,421)       | 15.5   | (10.5 to 21.2)       |
| Denmark | Deaths  | Male   | 1990 | 2,594   | (2,132 to 3,349)       | 84.1   | (68.8 to 108.4)      |
|         |         |        | 2013 | 2,286   | (1,557 to 2,789)       | 55.9   | (38.1 to 68.1)       |
|         |         | Female | 1990 | 3,790   | (3,008 to 4,367)       | 75.1   | (60.3 to 87.8)       |
|         |         |        | 2013 | 2,758   | (2,193 to 3,551)       | 46.5   | (37.0 to 59.8)       |
|         |         | Both   | 1990 | 6,385   | (5,522 to 7,384)       | 79.3   | (68.9 to 92.1)       |
|         |         |        | 2013 | 5,045   | (4,137 to 5,894)       | 50.9   | (41.6 to 59.4)       |
|         | DALYs   | Male   | 1990 | 42,131  | (35,332 to 54,068)     | 1358.1 | (1139.7 to 1745.9)   |
|         |         |        | 2013 | 35,322  | (25,136 to 42,053)     | 856.8  | (609.0 to 1017.5)    |
|         |         | Female | 1990 | 46,829  | (38,421 to 55,090)     | 1088.8 | (904.3 to 1309.7)    |
|         |         |        | 2013 | 31,436  | (26,223 to 39,275)     | 613.8  | (508.2 to 757.9)     |
|         |         | Both   | 1990 | 88,961  | (79,703 to 103,627)    | 1207.2 | (1082.5 to 1420.6)   |
|         |         |        | 2013 | 66,758  | (55,470 to 75,896)     | 727.2  | (598.3 to 827.5)     |
|         | YLDs    | Male   | 1990 | 3,755   | (2,580 to 5,061)       | 120.6  | (83.1 to 161.6)      |
|         |         |        |      |         |                        |        | Uncertainty Interval |
| Country | measure | sex    | year | number  | Uncertainty Interval   | Rate   | Interval             |
|         |         |        | 2013 | 5,073   | (3,319 to 7,271)       | 122.4  | (80.1 to 174.4)      |
|         |         | Female | 1990 | 3,435   | (2,324 to 4,792)       | 83.6   | (56.9 to 116.6)      |

|          |        |        |      |        |                   |        |                    |
|----------|--------|--------|------|--------|-------------------|--------|--------------------|
|          |        |        | 2013 | 4,014  | (2,582 to 5,698)  | 83.3   | (54.3 to 116.6)    |
|          |        | Both   | 1990 | 7,190  | (5,027 to 9,691)  | 99.6   | (69.5 to 133.5)    |
|          |        |        | 2013 | 9,087  | (6,275 to 12,118) | 101.8  | (70.5 to 135.6)    |
| Djibouti | Deaths | Male   | 1990 | 147    | (100 to 212)      | 197.8  | (142.4 to 273.2)   |
|          |        |        | 2013 | 251    | (180 to 377)      | 156.8  | (116.6 to 227.9)   |
|          |        | Female | 1990 | 220    | (127 to 329)      | 256.3  | (156.1 to 363.5)   |
|          |        |        | 2013 | 359    | (227 to 542)      | 201.3  | (132.5 to 294.7)   |
|          |        | Both   | 1990 | 367    | (242 to 527)      | 230.5  | (160.4 to 312.6)   |
|          |        |        | 2013 | 610    | (428 to 903)      | 181.2  | (132.0 to 258.3)   |
|          | DALYs  | Male   | 1990 | 3,726  | (2,480 to 5,546)  | 3444.2 | (2364.0 to 4963.5) |
|          |        |        | 2013 | 5,526  | (3,781 to 8,577)  | 2651.2 | (1892.5 to 3997.1) |
|          |        | Female | 1990 | 5,029  | (2,783 to 7,864)  | 4391.1 | (2525.8 to 6610.1) |
|          |        |        | 2013 | 7,051  | (4,261 to 11,061) | 3252.7 | (2026.8 to 4983.6) |
|          |        | Both   | 1990 | 8,756  | (5,610 to 12,994) | 3961.8 | (2596.6 to 5694.6) |
|          |        |        | 2013 | 12,578 | (8,486 to 19,430) | 2976.1 | (2061.8 to 4499.5) |
|          | YLDs   | Male   | 1990 | 17     | (11 to 25)        | 13.1   | (8.7 to 19.3)      |
|          |        |        | 2013 | 34     | (21 to 52)        | 13.3   | (8.4 to 20.3)      |
|          |        | Female | 1990 | 12     | (7 to 17)         | 8.6    | (5.4 to 12.4)      |
|          |        |        | 2013 | 26     | (17 to 38)        | 9.7    | (6.3 to 14.0)      |
|          |        | Both   | 1990 | 29     | (19 to 41)        | 10.7   | (7.1 to 14.8)      |
|          |        |        | 2013 | 60     | (39 to 86)        | 11.4   | (7.4 to 16.3)      |
| Dominica | Deaths | Male   | 1990 | 25     | (21 to 30)        | 124.6  | (102.9 to 151.7)   |
|          |        |        | 2013 | 30     | (21 to 39)        | 105.4  | (77.2 to 138.9)    |
|          |        | Female | 1990 | 35     | (29 to 42)        | 150.7  | (127.3 to 182.1)   |
|          |        |        | 2013 | 31     | (23 to 41)        | 90.5   | (66.1 to 118.1)    |
|          |        | Both   | 1990 | 60     | (53 to 68)        | 138.9  | (122.9 to 158.1)   |
|          |        |        | 2013 | 62     | (50 to 75)        | 98.2   | (80.6 to 120.1)    |
|          | DALYs  | Male   | 1990 | 510    | (426 to 611)      | 2237.2 | (1873.7 to 2690.2) |



|                    |         |        | 2013 | 573     | (419 to 769)         | 1882.7 | (1383.5 to 2521.0)   |
|--------------------|---------|--------|------|---------|----------------------|--------|----------------------|
|                    |         | Female | 1990 | 610     | (516 to 729)         | 2482.4 | (2092.5 to 2971.8)   |
|                    |         |        | 2013 | 439     | (321 to 586)         | 1270.1 | (928.9 to 1696.6)    |
|                    |         | Both   | 1990 | 1,120   | (993 to 1,259)       | 2371.1 | (2093.5 to 2679.7)   |
|                    |         |        | 2013 | 1,012   | (816 to 1,246)       | 1566.9 | (1265.6 to 1927.0)   |
|                    | YLDs    | Male   | 1990 | 12      | (7 to 17)            | 55.7   | (35.3 to 79.8)       |
|                    |         |        | 2013 | 16      | (11 to 23)           | 56.7   | (38.0 to 79.2)       |
|                    |         | Female | 1990 | 10      | (6 to 14)            | 42.2   | (27.6 to 59.5)       |
|                    |         |        | 2013 | 14      | (10 to 19)           | 42.4   | (29.5 to 57.7)       |
|                    |         | Both   | 1990 | 22      | (15 to 30)           | 48.7   | (33.2 to 66.1)       |
|                    |         |        | 2013 | 31      | (22 to 42)           | 49.1   | (34.6 to 66.4)       |
| Dominican Republic | Deaths  | Male   | 1990 | 1,503   | (1,260 to 1,738)     | 103.8  | (86.1 to 120.2)      |
|                    |         |        |      |         |                      |        | Uncertainty Interval |
| Country            | measure | sex    | year | number  | Uncertainty Interval | Rate   | Interval             |
|                    |         |        | 2013 | 4,043   | (3,137 to 5,461)     | 118.4  | (92.1 to 158.9)      |
|                    |         | Female | 1990 | 1,328   | (1,145 to 1,621)     | 95.4   | (81.4 to 117.1)      |
|                    |         |        | 2013 | 3,834   | (2,893 to 5,045)     | 103    | (77.8 to 135.7)      |
|                    |         | Both   | 1990 | 2,831   | (2,550 to 3,166)     | 99.8   | (89.6 to 111.9)      |
|                    |         |        | 2013 | 7,878   | (6,526 to 9,768)     | 110.7  | (91.8 to 137.5)      |
|                    | DALYs   | Male   | 1990 | 34,073  | (28,737 to 39,375)   | 1816   | (1528.8 to 2095.9)   |
|                    |         |        | 2013 | 75,891  | (57,673 to 103,470)  | 2049.6 | (1565.5 to 2785.2)   |
|                    |         | Female | 1990 | 28,873  | (24,722 to 34,723)   | 1588.9 | (1376.0 to 1902.5)   |
|                    |         |        | 2013 | 61,627  | (46,858 to 82,575)   | 1585.5 | (1202.5 to 2129.0)   |
|                    |         | Both   | 1990 | 62,947  | (56,796 to 70,497)   | 1706.4 | (1539.6 to 1897.5)   |
|                    |         |        | 2013 | 137,519 | (111,432 to 174,083) | 1813.5 | (1476.0 to 2294.6)   |
|                    | YLDs    | Male   | 1990 | 1,117   | (749 to 1,506)       | 65.2   | (43.8 to 87.4)       |
|                    |         |        | 2013 | 2,192   | (1,454 to 3,142)     | 60.9   | (40.3 to 88.6)       |
|                    |         | Female | 1990 | 719     | (495 to 988)         | 44.6   | (30.8 to 61.6)       |

|         |        |        |      |         |                        |        |                    |
|---------|--------|--------|------|---------|------------------------|--------|--------------------|
|         |        |        | 2013 | 1,758   | (1,203 to 2,414)       | 46.1   | (31.3 to 63.3)     |
|         |        | Both   | 1990 | 1,836   | (1,275 to 2,451)       | 55.1   | (38.3 to 74.1)     |
|         |        |        | 2013 | 3,951   | (2,699 to 5,446)       | 53.3   | (36.2 to 73.5)     |
| Ecuador | Deaths | Male   | 1990 | 1,513   | (1,266 to 1,784)       | 70     | (58.3 to 83.0)     |
|         |        |        | 2013 | 3,145   | (2,460 to 3,980)       | 60.9   | (47.9 to 76.5)     |
|         |        | Female | 1990 | 1,496   | (1,157 to 1,733)       | 61     | (47.3 to 71.0)     |
|         |        |        | 2013 | 2,869   | (2,281 to 3,854)       | 48.3   | (38.4 to 65.0)     |
|         |        | Both   | 1990 | 3,009   | (2,631 to 3,352)       | 65.2   | (56.7 to 73.1)     |
|         |        |        | 2013 | 6,015   | (5,042 to 7,262)       | 54.3   | (45.6 to 65.4)     |
|         | DALYs  | Male   | 1990 | 35,711  | (29,709 to 41,592)     | 1280.9 | (1075.2 to 1499.8) |
|         |        |        | 2013 | 64,618  | (49,243 to 83,136)     | 1093.7 | (842.2 to 1395.1)  |
|         |        | Female | 1990 | 31,936  | (25,092 to 36,623)     | 1068.7 | (830.7 to 1219.1)  |
|         |        |        | 2013 | 50,002  | (38,074 to 69,622)     | 783.9  | (598.9 to 1078.8)  |
|         |        | Both   | 1990 | 67,647  | (59,069 to 74,968)     | 1169.6 | (1024.5 to 1295.9) |
|         |        |        | 2013 | 114,620 | (94,260 to 141,051)    | 933    | (772.6 to 1140.7)  |
|         | YLDs   | Male   | 1990 | 575     | (383 to 798)           | 21.4   | (14.3 to 29.8)     |
|         |        |        | 2013 | 1,318   | (870 to 1,846)         | 22.9   | (15.2 to 32.4)     |
|         |        | Female | 1990 | 331     | (222 to 456)           | 11.5   | (7.7 to 15.9)      |
|         |        |        | 2013 | 739     | (497 to 1,025)         | 11.8   | (7.9 to 16.4)      |
|         |        | Both   | 1990 | 906     | (620 to 1,233)         | 16.3   | (11.1 to 22.0)     |
|         |        |        | 2013 | 2,057   | (1,434 to 2,834)       | 17.1   | (11.9 to 23.4)     |
| Egypt   | Deaths | Male   | 1990 | 30,633  | (25,205 to 35,742)     | 253.9  | (206.1 to 295.7)   |
|         |        |        | 2013 | 42,850  | (37,052 to 50,865)     | 214.3  | (186.7 to 252.8)   |
|         |        | Female | 1990 | 32,611  | (26,879 to 36,977)     | 210.5  | (173.3 to 240.3)   |
|         |        |        | 2013 | 43,095  | (36,664 to 51,938)     | 168.3  | (144.2 to 201.2)   |
|         |        | Both   | 1990 | 63,244  | (54,331 to 70,577)     | 228.9  | (194.5 to 255.3)   |
|         |        |        | 2013 | 85,945  | (77,590 to 98,122)     | 188.4  | (170.6 to 214.6)   |
|         | DALYs  | Male   | 1990 | 963,660 | (782,908 to 1,129,509) | 4916.4 | (4058.7 to 5750.0) |

| Country     | measure | sex    | year | number    | Uncertainty Interval     | Rate   | Uncertainty Interval |
|-------------|---------|--------|------|-----------|--------------------------|--------|----------------------|
|             |         |        | 2013 | 1,020,448 | (868,191 to 1,216,766)   | 3762.3 | (3235.7 to 4478.4)   |
|             |         | Female | 1990 | 792,416   | (607,456 to 942,084)     | 3764.6 | (3097.0 to 4308.7)   |
|             |         |        | 2013 | 774,206   | (653,763 to 928,879)     | 2612.6 | (2207.1 to 3141.0)   |
|             |         | Both   | 1990 | 1,756,077 | (1,450,099 to 1,978,155) | 4298.4 | (3715.7 to 4817.4)   |
|             |         |        | 2013 | 1,794,655 | (1,600,665 to 2,054,314) | 3149.7 | (2827.8 to 3590.8)   |
|             | YLDs    | Male   | 1990 | 1,702     | (1,109 to 2,384)         | 10.7   | (7.0 to 15.1)        |
|             |         |        | 2013 | 3,051     | (2,044 to 4,322)         | 10.9   | (7.2 to 15.4)        |
|             |         | Female | 1990 | 1,646     | (1,089 to 2,314)         | 9      | (5.9 to 12.6)        |
|             |         |        | 2013 | 2,673     | (1,696 to 3,784)         | 8.6    | (5.4 to 12.3)        |
|             |         | Both   | 1990 | 3,348     | (2,265 to 4,564)         | 9.8    | (6.7 to 13.2)        |
|             |         |        | 2013 | 5,724     | (3,822 to 7,910)         | 9.7    | (6.5 to 13.3)        |
| El Salvador | Deaths  | Male   | 1990 | 686       | (567 to 833)             | 58.3   | (47.6 to 71.1)       |
|             |         |        | 2013 | 894       | (705 to 1,153)           | 44.3   | (34.9 to 57.0)       |
|             |         | Female | 1990 | 777       | (582 to 895)             | 54.1   | (40.4 to 62.7)       |
|             |         |        | 2013 | 1,106     | (848 to 1,496)           | 40.2   | (30.9 to 54.3)       |
|             |         | Both   | 1990 | 1,464     | (1,212 to 1,637)         | 56     | (46.5 to 63.0)       |
|             |         |        | 2013 | 2,000     | (1,694 to 2,491)         | 42     | (35.5 to 52.4)       |
|             | DALYs   | Male   | 1990 | 16,978    | (14,108 to 20,413)       | 1099.5 | (917.1 to 1318.9)    |
|             |         |        | 2013 | 16,937    | (13,317 to 21,966)       | 797.4  | (625.6 to 1039.9)    |
|             |         | Female | 1990 | 17,085    | (12,646 to 19,117)       | 971.1  | (723.1 to 1080.9)    |
|             |         |        | 2013 | 17,824    | (13,754 to 24,611)       | 648.2  | (500.0 to 896.8)     |
|             |         | Both   | 1990 | 34,064    | (28,395 to 37,957)       | 1029.8 | (861.2 to 1149.0)    |
|             |         |        | 2013 | 34,761    | (29,442 to 43,926)       | 713.4  | (603.4 to 900.5)     |
|             | YLDs    | Male   | 1990 | 345       | (233 to 475)             | 25.9   | (17.4 to 35.8)       |
|             |         |        | 2013 | 544       | (354 to 755)             | 26.8   | (17.2 to 37.2)       |

|                   |                |            |             |                |                             |                  |                             |
|-------------------|----------------|------------|-------------|----------------|-----------------------------|------------------|-----------------------------|
|                   |                | Female     | 1990        | 289            | (197 to 385)                | 18.7             | (12.7 to 24.8)              |
|                   |                |            | 2013        | 486            | (316 to 699)                | 18.2             | (11.7 to 26.4)              |
|                   |                | Both       | 1990        | 635            | (433 to 844)                | 22               | (15.1 to 29.3)              |
|                   |                |            | 2013        | 1,031          | (697 to 1,402)              | 21.9             | (14.9 to 29.8)              |
| Equatorial Guinea | Deaths         | Male       | 1990        | 203            | (140 to 276)                | 256.9            | (178.7 to 342.1)            |
|                   |                |            | 2013        | 264            | (185 to 404)                | 185              | (138.0 to 265.0)            |
|                   |                | Female     | 1990        | 215            | (143 to 300)                | 252              | (170.1 to 346.2)            |
|                   |                |            | 2013        | 221            | (152 to 363)                | 179.2            | (126.1 to 284.2)            |
|                   |                | Both       | 1990        | 419            | (291 to 562)                | 256.3            | (180.7 to 339.1)            |
|                   |                |            | 2013        | 486            | (349 to 739)                | 183.6            | (139.3 to 268.4)            |
|                   | DALYs          | Male       | 1990        | 5,221          | (3,548 to 7,137)            | 5204.8           | (3533.8 to 7091.1)          |
|                   |                |            | 2013        | 7,076          | (4,707 to 11,058)           | 3409.4           | (2390.1 to 5153.9)          |
|                   |                | Female     | 1990        | 4,607          | (2,961 to 6,651)            | 4506.5           | (2942.7 to 6445.4)          |
|                   |                |            | 2013        | 5,055          | (3,181 to 8,452)            | 2911.4           | (1966.7 to 4816.0)          |
|                   |                | Both       | 1990        | 9,829          | (6,734 to 13,387)           | 4878.2           | (3340.0 to 6653.5)          |
|                   |                |            |             |                |                             |                  |                             |
| <b>Country</b>    | <b>measure</b> | <b>sex</b> | <b>year</b> | <b>number</b>  | <b>Uncertainty Interval</b> | <b>Rate</b>      | <b>Uncertainty Interval</b> |
|                   |                |            | 2013        | 12,132         | (8,112 to 18,736)           | 3186.4           | (2259.7 to 4864.1)          |
|                   | YLDs           | Male       | 1990        | 18             | (12 to 26)                  | 18               | (12.2 to 25.4)              |
|                   |                |            | 2013        | 40             | (26 to 60)                  | 18.5             | (12.2 to 27.3)              |
|                   |                | Female     | 1990        | 13             | (9 to 19)                   | 13.3             | (8.8 to 18.4)               |
|                   |                |            | 2013        | 27             | (17 to 38)                  | 13.8             | (8.9 to 19.3)               |
|                   |                | Both       | 1990        | 32             | (22 to 44)                  | 15.6             | (10.9 to 21.3)              |
|                   |                |            | 2013        | 67             | (45 to 95)                  | 16.2             | (10.9 to 22.8)              |
| Eritrea           | Deaths         | Male       | 1990        | 430            | (306 to 576)                | 152.2            | (108.8 to 199.5)            |
|                   |                |            | 2013        | 932            | (640 to 1,253)              | 146.5            | (103.3 to 192.7)            |
|                   | Female         | 1990       | 732         | (334 to 998)   | 196.6                       | (94.4 to 268.5)  |                             |
|                   |                | 2013       | 1,591       | (961 to 2,177) | 187.3                       | (116.2 to 250.5) |                             |

|         |        |        |      |        |                    |        |                    |
|---------|--------|--------|------|--------|--------------------|--------|--------------------|
|         |        | Both   | 1990 | 1,162  | (699 to 1,489)     | 182.3  | (107.3 to 235.0)   |
|         |        |        | 2013 | 2,523  | (1,810 to 3,164)   | 173.6  | (123.0 to 217.4)   |
|         | DALYs  | Male   | 1990 | 12,554 | (8,939 to 16,636)  | 2823.4 | (2029.9 to 3745.6) |
|         |        |        | 2013 | 24,190 | (16,596 to 32,867) | 2594.7 | (1812.2 to 3447.4) |
|         |        | Female | 1990 | 18,134 | (7,813 to 25,241)  | 3447.7 | (1596.9 to 4681.7) |
|         |        |        | 2013 | 33,805 | (19,739 to 48,606) | 3081.3 | (1867.0 to 4219.8) |
|         |        | Both   | 1990 | 30,688 | (18,443 to 39,428) | 3223.7 | (1937.8 to 4133.4) |
|         |        |        | 2013 | 57,995 | (40,690 to 74,628) | 2910.2 | (2092.4 to 3641.0) |
|         | YLDs   | Male   | 1990 | 83     | (53 to 123)        | 13.1   | (8.8 to 18.7)      |
|         |        |        | 2013 | 179    | (118 to 249)       | 13.9   | (9.0 to 19.3)      |
|         |        | Female | 1990 | 59     | (37 to 85)         | 8.3    | (5.3 to 12.2)      |
|         |        |        | 2013 | 133    | (86 to 191)        | 8.6    | (5.5 to 12.2)      |
|         |        | Both   | 1990 | 143    | (95 to 199)        | 10.4   | (7.1 to 14.1)      |
|         |        |        | 2013 | 313    | (211 to 421)       | 10.8   | (7.4 to 14.7)      |
| Estonia | Deaths | Male   | 1990 | 997    | (844 to 1,204)     | 175    | (148.1 to 211.9)   |
|         |        |        | 2013 | 892    | (701 to 1,067)     | 115.7  | (90.9 to 138.7)    |
|         |        | Female | 1990 | 2,150  | (1,688 to 2,339)   | 164.4  | (128.6 to 178.7)   |
|         |        |        | 2013 | 1,157  | (863 to 1,833)     | 63     | (47.3 to 99.6)     |
|         |        | Both   | 1990 | 3,147  | (2,645 to 3,427)   | 170.4  | (143.2 to 185.6)   |
|         |        |        | 2013 | 2,049  | (1,666 to 2,747)   | 81.9   | (67.0 to 108.4)    |
|         | DALYs  | Male   | 1990 | 18,934 | (16,008 to 23,141) | 2915.6 | (2477.3 to 3563.6) |
|         |        |        | 2013 | 14,633 | (11,677 to 17,308) | 1871.8 | (1489.4 to 2206.1) |
|         |        | Female | 1990 | 28,555 | (21,985 to 31,029) | 2328.7 | (1777.7 to 2534.5) |
|         |        |        | 2013 | 12,389 | (9,437 to 19,207)  | 807.7  | (623.2 to 1237.1)  |
|         |        | Both   | 1990 | 47,489 | (40,625 to 52,074) | 2577.1 | (2200.8 to 2826.1) |
|         |        |        | 2013 | 27,023 | (22,504 to 34,268) | 1223.5 | (1028.8 to 1537.0) |
|         | YLDs   | Male   | 1990 | 352    | (226 to 498)       | 49.1   | (31.7 to 69.4)     |
|         |        |        | 2013 | 373    | (230 to 543)       | 48.8   | (30.4 to 70.8)     |

|                                |         |        |      |           |                        |        |                      |
|--------------------------------|---------|--------|------|-----------|------------------------|--------|----------------------|
|                                |         | Female | 1990 | 373       | (252 to 522)           | 33.7   | (22.6 to 47.0)       |
|                                |         |        | 2013 | 385       | (252 to 536)           | 32     | (21.1 to 44.5)       |
|                                |         | Both   | 1990 | 725       | (492 to 988)           | 40     | (27.2 to 54.6)       |
|                                |         |        |      |           |                        |        | Uncertainty Interval |
| Country                        | measure | sex    | year | number    | Uncertainty Interval   | Rate   | Interval             |
|                                |         |        | 2013 | 759       | (513 to 1,038)         | 39.1   | (26.3 to 54.0)       |
| Ethiopia                       | Deaths  | Male   | 1990 | 14,814    | (11,169 to 17,965)     | 187.1  | (141.0 to 226.5)     |
|                                |         |        | 2013 | 23,674    | (19,160 to 28,487)     | 160.4  | (130.6 to 191.0)     |
|                                |         | Female | 1990 | 15,246    | (11,971 to 19,249)     | 195.1  | (154.0 to 245.2)     |
|                                |         |        | 2013 | 30,102    | (22,393 to 36,271)     | 188.2  | (141.1 to 225.4)     |
|                                |         | Both   | 1990 | 30,060    | (25,366 to 34,459)     | 191.2  | (163.1 to 219.4)     |
|                                |         |        | 2013 | 53,777    | (43,469 to 61,946)     | 175.2  | (141.6 to 200.9)     |
|                                | DALYs   | Male   | 1990 | 344,053   | (258,291 to 424,488)   | 3475.1 | (2628.5 to 4217.0)   |
|                                |         |        | 2013 | 473,723   | (376,293 to 578,826)   | 2639.7 | (2126.0 to 3209.9)   |
|                                |         | Female | 1990 | 336,654   | (262,743 to 425,062)   | 3431.7 | (2681.3 to 4322.0)   |
|                                |         |        | 2013 | 553,015   | (408,475 to 677,748)   | 2945.9 | (2193.5 to 3571.0)   |
|                                |         | Both   | 1990 | 680,708   | (564,005 to 781,995)   | 3452.1 | (2898.6 to 3959.7)   |
|                                |         |        | 2013 | 1,026,739 | (827,994 to 1,188,943) | 2803.3 | (2263.3 to 3221.0)   |
|                                | YLDs    | Male   | 1990 | 790       | (535 to 1,085)         | 6.9    | (4.6 to 9.7)         |
|                                |         |        | 2013 | 1,781     | (1,184 to 2,454)       | 8      | (5.4 to 11.0)        |
|                                |         | Female | 1990 | 661       | (446 to 921)           | 5.7    | (3.8 to 7.7)         |
|                                |         |        | 2013 | 1,289     | (873 to 1,787)         | 5.4    | (3.7 to 7.5)         |
|                                |         | Both   | 1990 | 1,451     | (990 to 1,952)         | 6.3    | (4.3 to 8.4)         |
|                                |         |        | 2013 | 3,071     | (2,102 to 4,196)       | 6.6    | (4.6 to 9.1)         |
| Federated States of Micronesia | Deaths  | Male   | 1990 | 39        | (24 to 55)             | 223.7  | (139.7 to 300.1)     |
|                                |         |        | 2013 | 47        | (31 to 69)             | 201.7  | (139.5 to 281.5)     |
|                                |         | Female | 1990 | 24        | (16 to 36)             | 136    | (91.0 to 206.9)      |

|         |         |        | 2013 | 34     | (21 to 51)           | 135.7  | (87.6 to 197.0)      |
|---------|---------|--------|------|--------|----------------------|--------|----------------------|
|         |         | Both   | 1990 | 64     | (42 to 90)           | 178.5  | (124.2 to 242.0)     |
|         |         |        | 2013 | 81     | (54 to 118)          | 166.3  | (116.6 to 231.0)     |
|         | DALYs   | Male   | 1990 | 1,079  | (661 to 1,589)       | 4699   | (2876.0 to 6739.4)   |
|         |         |        | 2013 | 1,218  | (776 to 1,890)       | 4101.4 | (2714.3 to 6134.2)   |
|         |         | Female | 1990 | 578    | (367 to 883)         | 2579.8 | (1663.9 to 3932.5)   |
|         |         |        | 2013 | 718    | (429 to 1,135)       | 2426.2 | (1490.7 to 3722.6)   |
|         |         | Both   | 1990 | 1,658  | (1,065 to 2,439)     | 3622.8 | (2353.3 to 5215.9)   |
|         |         |        | 2013 | 1,937  | (1,230 to 2,964)     | 3230.7 | (2108.8 to 4810.1)   |
|         | YLDs    | Male   | 1990 | 10     | (7 to 14)            | 54.4   | (36.7 to 77.4)       |
|         |         |        | 2013 | 14     | (9 to 20)            | 56     | (38.3 to 78.9)       |
|         |         | Female | 1990 | 7      | (5 to 10)            | 39     | (26.4 to 54.1)       |
|         |         |        | 2013 | 12     | (8 to 17)            | 43.5   | (29.6 to 58.7)       |
|         |         | Both   | 1990 | 18     | (12 to 25)           | 46.5   | (31.9 to 63.2)       |
|         |         |        | 2013 | 26     | (18 to 36)           | 49.3   | (34.0 to 66.2)       |
| Fiji    | Deaths  | Male   | 1990 | 247    | (187 to 327)         | 187.5  | (146.6 to 239.6)     |
|         |         |        | 2013 | 324    | (245 to 424)         | 139.1  | (108.5 to 175.9)     |
|         |         | Female | 1990 | 306    | (181 to 410)         | 240    | (145.1 to 315.0)     |
|         |         |        | 2013 | 330    | (253 to 478)         | 132.6  | (104.3 to 184.6)     |
| Country | measure | sex    | year | number | Uncertainty Interval | Rate   | Uncertainty Interval |
|         |         | Both   | 1990 | 553    | (415 to 675)         | 214.6  | (162.4 to 258.0)     |
|         |         |        | 2013 | 654    | (537 to 816)         | 136.2  | (114.0 to 168.0)     |
|         | DALYs   | Male   | 1990 | 7,541  | (5,541 to 10,324)    | 3809   | (2918.8 to 5048.0)   |
|         |         |        | 2013 | 8,907  | (6,669 to 11,925)    | 2760.4 | (2100.5 to 3591.6)   |
|         |         | Female | 1990 | 8,056  | (4,683 to 10,924)    | 4592.4 | (2719.4 to 6160.4)   |
|         |         |        | 2013 | 7,748  | (5,792 to 11,344)    | 2399.2 | (1826.5 to 3487.2)   |
|         |         | Both   | 1990 | 15,597 | (11,719 to 19,341)   | 4205.7 | (3166.6 to 5141.2)   |
|         |         |        | 2013 | 16,655 | (13,384 to 21,144)   | 2581.9 | (2117.5 to 3224.1)   |

|         |        |        |      |        |                     |        |                    |
|---------|--------|--------|------|--------|---------------------|--------|--------------------|
|         | YLDs   | Male   | 1990 | 81     | (55 to 109)         | 55.2   | (37.1 to 73.4)     |
|         |        |        | 2013 | 151    | (100 to 213)        | 52.9   | (35.1 to 75.9)     |
|         |        | Female | 1990 | 63     | (42 to 89)          | 42.5   | (28.0 to 60.2)     |
|         |        |        | 2013 | 131    | (86 to 180)         | 43.4   | (29.0 to 59.6)     |
|         |        | Both   | 1990 | 145    | (101 to 190)        | 48.7   | (34.5 to 63.3)     |
|         |        |        | 2013 | 282    | (190 to 385)        | 47.9   | (32.3 to 65.7)     |
| Finland | Deaths | Male   | 1990 | 2,217  | (1,850 to 2,779)    | 99.9   | (83.0 to 125.8)    |
|         |        |        | 2013 | 2,451  | (1,913 to 3,002)    | 58.2   | (45.4 to 71.1)     |
|         |        | Female | 1990 | 3,861  | (3,041 to 4,347)    | 88     | (69.0 to 98.9)     |
|         |        |        | 2013 | 2,994  | (2,425 to 4,231)    | 41.2   | (33.8 to 58.1)     |
|         |        | Both   | 1990 | 6,078  | (5,264 to 6,847)    | 93.6   | (81.1 to 105.6)    |
|         |        |        | 2013 | 5,446  | (4,697 to 6,740)    | 48.8   | (42.3 to 59.9)     |
|         | DALYs  | Male   | 1990 | 41,349 | (35,247 to 51,558)  | 1686.8 | (1432.4 to 2110.6) |
|         |        |        | 2013 | 37,655 | (30,048 to 45,167)  | 919.8  | (730.1 to 1103.8)  |
|         |        | Female | 1990 | 49,602 | (40,175 to 54,893)  | 1239.5 | (1009.4 to 1372.9) |
|         |        |        | 2013 | 30,361 | (25,542 to 41,668)  | 527.4  | (447.7 to 727.5)   |
|         |        | Both   | 1990 | 90,951 | (81,930 to 102,719) | 1434.6 | (1292.6 to 1620.7) |
|         |        |        | 2013 | 68,016 | (59,760 to 81,043)  | 707.7  | (621.7 to 834.1)   |
|         | YLDs   | Male   | 1990 | 3,317  | (2,279 to 4,482)    | 132.5  | (91.3 to 179.6)    |
|         |        |        | 2013 | 4,149  | (2,710 to 5,871)    | 101.1  | (66.2 to 142.7)    |
|         |        | Female | 1990 | 3,274  | (2,204 to 4,422)    | 85.4   | (57.6 to 115.1)    |
|         |        |        | 2013 | 3,462  | (2,276 to 4,780)    | 66.4   | (43.9 to 91.1)     |
|         |        | Both   | 1990 | 6,592  | (4,578 to 8,733)    | 104.5  | (72.3 to 138.5)    |
|         |        |        | 2013 | 7,612  | (5,277 to 10,177)   | 82.1   | (56.5 to 110.9)    |
| France  | Deaths | Male   | 1990 | 20,524 | (17,124 to 24,744)  | 68.1   | (56.8 to 81.8)     |
|         |        |        | 2013 | 20,434 | (15,446 to 24,585)  | 38.8   | (29.8 to 46.7)     |
|         |        | Female | 1990 | 31,859 | (24,874 to 36,713)  | 55.3   | (43.3 to 63.9)     |
|         |        |        | 2013 | 28,647 | (23,373 to 39,225)  | 30.4   | (25.0 to 41.0)     |



|         |         | Both   | 1990 | 52,384  | (45,342 to 58,515)   | 61     | (53.2 to 68.1)       |
|---------|---------|--------|------|---------|----------------------|--------|----------------------|
|         |         |        | 2013 | 49,081  | (42,019 to 59,935)   | 34.1   | (29.5 to 40.7)       |
|         | DALYs   | Male   | 1990 | 328,019 | (282,094 to 387,969) | 1081.6 | (930.6 to 1280.2)    |
|         |         |        | 2013 | 279,127 | (227,254 to 332,158) | 597    | (485.6 to 711.9)     |
|         |         | Female | 1990 | 337,966 | (272,205 to 386,595) | 713.8  | (579.7 to 817.4)     |
|         |         |        | 2013 | 264,242 | (224,407 to 341,093) | 382.8  | (326.1 to 487.7)     |
| Country | measure | sex    | year | number  | Uncertainty Interval | Rate   | Uncertainty Interval |
|         |         | Both   | 1990 | 665,985 | (597,548 to 739,733) | 875.8  | (785.7 to 976.6)     |
|         |         |        | 2013 | 543,369 | (471,393 to 626,910) | 479.2  | (414.0 to 548.0)     |
|         | YLDs    | Male   | 1990 | 28,221  | (18,209 to 40,206)   | 92.3   | (59.6 to 130.8)      |
|         |         |        | 2013 | 41,260  | (27,277 to 57,971)   | 90.3   | (59.7 to 127.5)      |
|         |         | Female | 1990 | 26,510  | (17,395 to 37,606)   | 61.3   | (40.5 to 85.7)       |
|         |         |        | 2013 | 37,935  | (23,724 to 54,159)   | 62     | (40.1 to 87.0)       |
|         |         | Both   | 1990 | 54,732  | (38,251 to 74,357)   | 74.2   | (52.2 to 99.6)       |
|         |         |        | 2013 | 79,196  | (53,660 to 105,965)  | 74.9   | (50.5 to 100.5)      |
| Gabon   | Deaths  | Male   | 1990 | 695     | (564 to 835)         | 287.5  | (233.4 to 342.3)     |
|         |         |        | 2013 | 1,179   | (920 to 1,462)       | 296.1  | (230.9 to 361.6)     |
|         |         | Female | 1990 | 671     | (542 to 832)         | 229.9  | (186.6 to 286.4)     |
|         |         |        | 2013 | 1,059   | (763 to 1,469)       | 224.7  | (162.7 to 310.8)     |
|         |         | Both   | 1990 | 1,366   | (1,186 to 1,573)     | 255.9  | (222.3 to 295.6)     |
|         |         |        | 2013 | 2,239   | (1,851 to 2,755)     | 259    | (214.3 to 319.2)     |
|         | DALYs   | Male   | 1990 | 15,416  | (12,407 to 18,659)   | 5476.9 | (4431.4 to 6609.7)   |
|         |         |        | 2013 | 26,738  | (20,403 to 34,202)   | 5724.3 | (4398.5 to 7200.6)   |
|         |         | Female | 1990 | 12,455  | (9,877 to 15,388)    | 3730.6 | (2973.5 to 4595.9)   |
|         |         |        | 2013 | 17,975  | (12,529 to 25,805)   | 3593.8 | (2506.2 to 5123.5)   |
|         |         | Both   | 1990 | 27,872  | (23,886 to 32,178)   | 4525.2 | (3898.2 to 5207.0)   |
|         |         |        | 2013 | 44,714  | (36,828 to 55,010)   | 4630.4 | (3806.8 to 5705.1)   |
|         | YLDs    | Male   | 1990 | 53      | (35 to 75)           | 18.7   | (12.3 to 26.3)       |

|         |        |        |      |         |                      |        |                      |
|---------|--------|--------|------|---------|----------------------|--------|----------------------|
|         |        |        | 2013 | 85      | (55 to 119)          | 17.6   | (11.1 to 24.6)       |
|         |        | Female | 1990 | 48      | (31 to 67)           | 13.9   | (9.0 to 19.3)        |
|         |        |        | 2013 | 73      | (46 to 102)          | 13.8   | (8.7 to 19.7)        |
|         |        | Both   | 1990 | 102     | (67 to 137)          | 16     | (10.6 to 21.5)       |
|         |        |        | 2013 | 158     | (104 to 215)         | 15.6   | (10.2 to 21.2)       |
| Georgia | Deaths | Male   | 1990 | 4,939   | (4,307 to 5,822)     | 264.5  | (230.8 to 309.7)     |
|         |        |        | 2013 | 6,300   | (5,252 to 7,361)     | 263    | (220.0 to 307.7)     |
|         |        | Female | 1990 | 6,433   | (5,773 to 7,469)     | 194.1  | (174.2 to 225.4)     |
|         |        |        | 2013 | 6,520   | (5,089 to 7,533)     | 155.8  | (121.4 to 180.5)     |
|         |        | Both   | 1990 | 11,373  | (10,438 to 12,897)   | 220.8  | (202.2 to 250.2)     |
|         |        |        | 2013 | 12,820  | (11,038 to 14,140)   | 198.7  | (171.4 to 219.4)     |
|         | DALYs  | Male   | 1990 | 101,038 | (88,129 to 120,312)  | 4598.9 | (4007.4 to 5458.1)   |
|         |        |        | 2013 | 109,010 | (90,759 to 127,760)  | 4476   | (3737.2 to 5251.8)   |
|         |        | Female | 1990 | 98,732  | (88,489 to 114,768)  | 2940   | (2634.2 to 3408.9)   |
|         |        |        | 2013 | 80,730  | (63,271 to 94,606)   | 2163.6 | (1695.4 to 2546.4)   |
|         |        | Both   | 1990 | 199,771 | (182,938 to 223,971) | 3616.3 | (3322.8 to 4050.5)   |
|         |        |        | 2013 | 189,741 | (165,386 to 211,508) | 3134.1 | (2734.6 to 3505.7)   |
|         | YLDs   | Male   | 1990 | 396     | (266 to 569)         | 16.5   | (11.1 to 23.7)       |
|         |        |        | 2013 | 400     | (254 to 578)         | 16.6   | (10.5 to 23.7)       |
|         |        | Female | 1990 | 429     | (273 to 612)         | 12.9   | (8.3 to 18.3)        |
|         |        |        | 2013 | 431     | (282 to 603)         | 12.8   | (8.4 to 17.7)        |
|         |        |        |      |         |                      |        | Uncertainty Interval |
|         |        | Both   | 1990 | 825     | (575 to 1,135)       | 14.5   | (10.2 to 19.8)       |
|         |        |        | 2013 | 831     | (559 to 1,127)       | 14.5   | (9.8 to 19.6)        |
| Germany | Deaths | Male   | 1990 | 41,458  | (34,260 to 49,896)   | 103.8  | (85.9 to 124.8)      |
|         |        |        | 2013 | 34,818  | (27,812 to 42,325)   | 47.2   | (37.7 to 57.5)       |
|         |        | Female | 1990 | 80,678  | (60,405 to 88,570)   | 91.8   | (69.7 to 100.5)      |
|         |        |        | 2013 | 47,165  | (39,344 to 66,591)   | 38.9   | (32.8 to 54.3)       |

|       |        |        |      |           |                          |        |                    |
|-------|--------|--------|------|-----------|--------------------------|--------|--------------------|
|       |        | Both   | 1990 | 122,137   | (100,823 to 134,575)     | 96.7   | (80.0 to 106.4)    |
|       |        |        | 2013 | 81,984    | (71,442 to 101,935)      | 42.8   | (37.4 to 52.9)     |
|       | DALYs  | Male   | 1990 | 645,789   | (544,031 to 769,060)     | 1547.9 | (1309.9 to 1845.8) |
|       |        |        | 2013 | 522,272   | (433,255 to 611,429)     | 734.8  | (607.8 to 862.4)   |
|       |        | Female | 1990 | 912,115   | (716,315 to 991,367)     | 1184.2 | (935.1 to 1288.9)  |
|       |        |        | 2013 | 509,638   | (439,241 to 670,431)     | 517.4  | (449.0 to 673.6)   |
|       |        | Both   | 1990 | 1,557,905 | (1,341,820 to 1,708,268) | 1330.6 | (1157.1 to 1457.3) |
|       |        |        | 2013 | 1,031,910 | (910,697 to 1,200,845)   | 617.9  | (547.4 to 708.9)   |
|       | YLDs   | Male   | 1990 | 49,459    | (34,066 to 68,172)       | 116.1  | (80.5 to 159.5)    |
|       |        |        | 2013 | 96,102    | (66,372 to 128,196)      | 137.6  | (95.5 to 183.4)    |
|       |        | Female | 1990 | 58,705    | (39,911 to 81,330)       | 83.9   | (57.0 to 115.7)    |
|       |        |        | 2013 | 94,618    | (66,067 to 124,828)      | 107.4  | (74.6 to 142.1)    |
|       |        | Both   | 1990 | 108,165   | (76,467 to 143,205)      | 96.4   | (68.2 to 128.1)    |
|       |        |        | 2013 | 190,721   | (136,118 to 249,622)     | 121.3  | (85.6 to 159.2)    |
| Ghana | Deaths | Male   | 1990 | 1,916     | (1,515 to 2,359)         | 91     | (71.9 to 110.8)    |
|       |        |        | 2013 | 7,058     | (5,731 to 8,416)         | 164.4  | (135.4 to 195.9)   |
|       |        | Female | 1990 | 1,793     | (1,081 to 3,848)         | 83.9   | (49.7 to 178.9)    |
|       |        |        | 2013 | 8,775     | (4,862 to 11,727)        | 170.8  | (94.5 to 226.6)    |
|       |        | Both   | 1990 | 3,710     | (2,784 to 5,747)         | 87.4   | (65.1 to 138.2)    |
|       |        |        | 2013 | 15,834    | (11,727 to 19,027)       | 169.8  | (125.7 to 203.6)   |
|       | DALYs  | Male   | 1990 | 53,957    | (42,692 to 67,360)       | 1677.1 | (1328.3 to 2056.8) |
|       |        |        | 2013 | 176,841   | (139,055 to 215,653)     | 2991.3 | (2412.1 to 3573.6) |
|       |        | Female | 1990 | 45,604    | (28,589 to 94,717)       | 1434.9 | (868.1 to 3072.0)  |
|       |        |        | 2013 | 175,476   | (96,395 to 237,735)      | 2743.3 | (1512.6 to 3704.3) |
|       |        | Both   | 1990 | 99,561    | (76,884 to 148,872)      | 1554.7 | (1171.5 to 2406.1) |
|       |        |        | 2013 | 352,318   | (261,390 to 425,448)     | 2877.2 | (2137.8 to 3442.1) |
|       | YLDs   | Male   | 1990 | 638       | (412 to 918)             | 19.5   | (12.6 to 27.9)     |
|       |        |        | 2013 | 1,236     | (788 to 1,758)           | 19.5   | (12.5 to 28.1)     |

|         |         |        |      |         |                      |        |                      |
|---------|---------|--------|------|---------|----------------------|--------|----------------------|
|         |         | Female | 1990 | 490     | (308 to 701)         | 14.5   | (9.1 to 20.9)        |
|         |         |        | 2013 | 1,079   | (699 to 1,553)       | 14.9   | (9.4 to 21.9)        |
|         |         | Both   | 1990 | 1,129   | (747 to 1,576)       | 16.9   | (11.2 to 23.7)       |
|         |         |        | 2013 | 2,316   | (1,542 to 3,134)     | 17     | (11.2 to 23.2)       |
| Greece  | Deaths  | Male   | 1990 | 7,881   | (6,762 to 9,097)     | 130.7  | (111.7 to 151.0)     |
|         |         |        | 2013 | 8,826   | (7,354 to 10,479)    | 83.7   | (69.9 to 98.7)       |
|         |         | Female | 1990 | 11,380  | (9,117 to 12,375)    | 141.1  | (112.8 to 153.3)     |
|         |         |        | 2013 | 13,384  | (11,289 to 17,756)   | 86     | (72.6 to 113.8)      |
|         |         |        |      |         |                      |        | Uncertainty Interval |
| Country | measure | sex    | year | number  | Uncertainty Interval | Rate   | Interval             |
|         |         | Both   | 1990 | 19,261  | (16,901 to 20,810)   | 137.2  | (120.4 to 148.3)     |
|         |         |        | 2013 | 22,211  | (19,589 to 27,057)   | 85.7   | (75.9 to 104.0)      |
|         | DALYs   | Male   | 1990 | 112,257 | (97,944 to 130,183)  | 1842.6 | (1606.8 to 2137.4)   |
|         |         |        | 2013 | 108,186 | (91,709 to 126,047)  | 1146.2 | (972.0 to 1336.3)    |
|         |         | Female | 1990 | 132,142 | (107,550 to 142,386) | 1710.7 | (1397.2 to 1842.1)   |
|         |         |        | 2013 | 127,432 | (110,060 to 166,426) | 950.5  | (825.2 to 1246.8)    |
|         |         | Both   | 1990 | 244,400 | (218,383 to 264,915) | 1780.1 | (1592.6 to 1929.5)   |
|         |         |        | 2013 | 235,619 | (210,478 to 279,112) | 1047.8 | (936.7 to 1240.8)    |
|         | YLDs    | Male   | 1990 | 6,582   | (4,371 to 9,217)     | 107.2  | (71.2 to 149.8)      |
|         |         |        | 2013 | 9,629   | (6,272 to 13,693)    | 106.2  | (69.9 to 151.1)      |
|         |         | Female | 1990 | 5,193   | (3,529 to 7,090)     | 69.5   | (47.0 to 94.9)       |
|         |         |        | 2013 | 8,010   | (5,114 to 11,386)    | 69.5   | (45.0 to 97.9)       |
|         |         | Both   | 1990 | 11,776  | (8,176 to 15,619)    | 86.5   | (59.8 to 114.7)      |
|         |         |        | 2013 | 17,639  | (12,019 to 24,729)   | 86.3   | (59.3 to 119.1)      |
| Grenada | Deaths  | Male   | 1990 | 41      | (35 to 49)           | 151.7  | (128.1 to 179.8)     |
|         |         |        | 2013 | 45      | (37 to 54)           | 138.7  | (114.1 to 164.2)     |
|         |         | Female | 1990 | 67      | (55 to 75)           | 168.1  | (138.2 to 191.1)     |
|         |         |        | 2013 | 64      | (52 to 81)           | 130.3  | (107.5 to 165.3)     |
|         |         | Both   | 1990 | 108     | (96 to 120)          | 162.1  | (143.6 to 179.7)     |

|           |         |        |      |        |                      |        |                      |
|-----------|---------|--------|------|--------|----------------------|--------|----------------------|
|           |         |        | 2013 | 110    | (96 to 129)          | 135.2  | (117.8 to 158.5)     |
|           | DALYs   | Male   | 1990 | 844    | (725 to 995)         | 2730.1 | (2331.1 to 3220.4)   |
|           |         |        | 2013 | 903    | (732 to 1,093)       | 2484.5 | (2023.5 to 2986.3)   |
|           |         | Female | 1990 | 1,147  | (930 to 1,292)       | 2806.8 | (2276.5 to 3172.4)   |
|           |         |        | 2013 | 956    | (779 to 1,214)       | 2074   | (1696.2 to 2639.3)   |
|           |         | Both   | 1990 | 1,992  | (1,773 to 2,194)     | 2783.8 | (2473.1 to 3062.1)   |
|           |         |        | 2013 | 1,859  | (1,619 to 2,151)     | 2275.7 | (1981.5 to 2632.6)   |
|           | YLDs    | Male   | 1990 | 18     | (12 to 24)           | 62.6   | (42.4 to 84.8)       |
|           |         |        | 2013 | 21     | (13 to 29)           | 59.7   | (39.5 to 83.0)       |
|           |         | Female | 1990 | 16     | (10 to 23)           | 40.8   | (26.3 to 58.4)       |
|           |         |        | 2013 | 19     | (12 to 26)           | 42     | (27.5 to 57.8)       |
|           |         | Both   | 1990 | 34     | (24 to 46)           | 49.9   | (35.1 to 67.5)       |
|           |         |        | 2013 | 40     | (27 to 54)           | 49.7   | (34.2 to 67.5)       |
| Guatemala | Deaths  | Male   | 1990 | 896    | (761 to 1,078)       | 58.8   | (48.7 to 71.6)       |
|           |         |        | 2013 | 1,459  | (1,183 to 1,821)     | 43.1   | (34.7 to 54.2)       |
|           |         | Female | 1990 | 847    | (741 to 1,266)       | 52.8   | (45.8 to 78.5)       |
|           |         |        | 2013 | 1,995  | (1,311 to 2,354)     | 49.5   | (32.7 to 58.4)       |
|           |         | Both   | 1990 | 1,744  | (1,547 to 2,207)     | 55.7   | (48.9 to 70.9)       |
|           |         |        | 2013 | 3,455  | (2,704 to 3,975)     | 46.6   | (36.6 to 54.0)       |
|           | DALYs   | Male   | 1990 | 22,899 | (19,458 to 27,374)   | 1053.4 | (900.2 to 1256.8)    |
|           |         |        | 2013 | 31,051 | (25,546 to 37,802)   | 753.3  | (617.2 to 919.5)     |
|           |         | Female | 1990 | 21,077 | (18,311 to 31,983)   | 940.9  | (826.2 to 1399.9)    |
|           |         |        | 2013 | 39,538 | (26,247 to 46,531)   | 836.3  | (566.7 to 980.9)     |
|           |         |        |      |        |                      |        | Uncertainty Interval |
| Country   | measure | sex    | year | number | Uncertainty Interval | Rate   | Interval             |
|           |         | Both   | 1990 | 43,976 | (38,983 to 55,908)   | 996.2  | (888.4 to 1258.6)    |
|           |         |        | 2013 | 70,590 | (55,886 to 80,391)   | 798.4  | (638.9 to 908.4)     |
|           | YLDs    | Male   | 1990 | 470    | (323 to 640)         | 22.4   | (15.5 to 30.3)       |
|           |         |        | 2013 | 1,013  | (665 to 1,411)       | 26.6   | (17.4 to 37.6)       |

|               |        |        |      |         |                      |        |                    |
|---------------|--------|--------|------|---------|----------------------|--------|--------------------|
|               |        | Female | 1990 | 362     | (244 to 498)         | 17.7   | (12.0 to 24.4)     |
|               |        |        | 2013 | 776     | (515 to 1,110)       | 17.5   | (11.4 to 25.3)     |
|               |        | Both   | 1990 | 832     | (580 to 1,095)       | 20     | (14.1 to 26.3)     |
|               |        |        | 2013 | 1,790   | (1,212 to 2,436)     | 21.7   | (14.6 to 29.6)     |
| Guinea        | Deaths | Male   | 1990 | 1,116   | (873 to 1,350)       | 108.2  | (85.4 to 130.9)    |
|               |        |        | 2013 | 2,897   | (2,216 to 3,613)     | 159.4  | (123.7 to 194.2)   |
|               |        | Female | 1990 | 1,558   | (804 to 2,099)       | 136.5  | (74.5 to 183.7)    |
|               |        |        | 2013 | 3,363   | (2,233 to 4,867)     | 172.2  | (115.8 to 242.5)   |
|               |        | Both   | 1990 | 2,674   | (1,838 to 3,237)     | 124    | (86.1 to 150.9)    |
|               |        |        | 2013 | 6,260   | (4,933 to 7,789)     | 166.7  | (132.7 to 206.5)   |
|               | DALYs  | Male   | 1990 | 34,020  | (26,010 to 42,357)   | 2041   | (1608.4 to 2472.5) |
|               |        |        | 2013 | 73,489  | (54,999 to 93,642)   | 2843.7 | (2176.3 to 3550.2) |
|               |        | Female | 1990 | 40,723  | (19,337 to 56,451)   | 2436.4 | (1258.4 to 3278.4) |
|               |        |        | 2013 | 75,540  | (49,101 to 111,740)  | 2882   | (1911.8 to 4164.5) |
|               |        | Both   | 1990 | 74,743  | (48,295 to 91,566)   | 2260   | (1558.4 to 2732.6) |
|               |        |        | 2013 | 149,030 | (116,667 to 186,520) | 2871.3 | (2267.9 to 3571.6) |
|               | YLDs   | Male   | 1990 | 283     | (176 to 412)         | 19.3   | (11.8 to 28.0)     |
|               |        |        | 2013 | 539     | (350 to 748)         | 19.4   | (12.7 to 27.0)     |
|               |        | Female | 1990 | 230     | (147 to 328)         | 14     | (8.9 to 19.7)      |
|               |        |        | 2013 | 429     | (277 to 624)         | 14.2   | (9.2 to 21.0)      |
|               |        | Both   | 1990 | 514     | (334 to 706)         | 16.4   | (10.9 to 22.7)     |
|               |        |        | 2013 | 969     | (658 to 1,324)       | 16.6   | (11.3 to 22.8)     |
| Guinea-Bissau | Deaths | Male   | 1990 | 195     | (128 to 307)         | 116.1  | (78.5 to 176.5)    |
|               |        |        | 2013 | 546     | (367 to 819)         | 196.4  | (135.0 to 286.5)   |
|               |        | Female | 1990 | 326     | (200 to 499)         | 172.2  | (109.4 to 257.5)   |
|               |        |        | 2013 | 636     | (401 to 1,026)       | 218    | (140.2 to 337.4)   |
|               |        | Both   | 1990 | 521     | (354 to 783)         | 147.8  | (102.4 to 216.3)   |
|               |        |        | 2013 | 1,182   | (816 to 1,741)       | 208.6  | (146.1 to 296.4)   |



|          |         |        |      |         |                      |        |                      |
|----------|---------|--------|------|---------|----------------------|--------|----------------------|
|          |         |        | 2013 | 93      | (63 to 127)          | 43.8   | (29.5 to 60.1)       |
|          |         | Both   | 1990 | 202     | (139 to 275)         | 52.4   | (36.1 to 71.5)       |
|          |         |        | 2013 | 189     | (130 to 258)         | 50.6   | (35.2 to 68.5)       |
| Haiti    | Deaths  | Male   | 1990 | 2,615   | (2,204 to 3,026)     | 174.3  | (146.4 to 201.1)     |
|          |         |        | 2013 | 3,654   | (3,005 to 4,389)     | 165.3  | (138.1 to 198.3)     |
|          |         | Female | 1990 | 4,353   | (3,622 to 5,246)     | 264.8  | (220.8 to 316.2)     |
|          |         |        | 2013 | 5,963   | (4,574 to 7,387)     | 227.7  | (177.2 to 280.6)     |
|          |         | Both   | 1990 | 6,968   | (6,109 to 7,874)     | 223.2  | (196.5 to 251.7)     |
|          |         |        | 2013 | 9,617   | (8,060 to 11,152)    | 199.9  | (169.0 to 230.9)     |
|          | DALYs   | Male   | 1990 | 82,444  | (67,914 to 98,114)   | 3677.9 | (3088.3 to 4265.7)   |
|          |         |        | 2013 | 91,690  | (73,850 to 111,470)  | 3107   | (2548.9 to 3737.8)   |
|          |         | Female | 1990 | 119,703 | (98,192 to 147,585)  | 5350.8 | (4435.8 to 6484.3)   |
|          |         |        | 2013 | 133,229 | (100,950 to 166,068) | 4154.4 | (3154.6 to 5166.2)   |
|          |         | Both   | 1990 | 202,148 | (174,633 to 231,506) | 4570.8 | (3989.5 to 5174.4)   |
|          |         |        | 2013 | 224,920 | (187,759 to 262,554) | 3673.7 | (3073.4 to 4264.1)   |
|          | YLDs    | Male   | 1990 | 931     | (610 to 1,312)       | 60.9   | (39.2 to 86.9)       |
|          |         |        | 2013 | 1,489   | (990 to 2,055)       | 60     | (39.7 to 82.8)       |
|          |         | Female | 1990 | 718     | (493 to 977)         | 42.8   | (29.4 to 58.6)       |
|          |         |        | 2013 | 1,233   | (820 to 1,675)       | 43     | (27.9 to 59.3)       |
|          |         | Both   | 1990 | 1,649   | (1,153 to 2,246)     | 51.2   | (35.7 to 70.6)       |
|          |         |        | 2013 | 2,723   | (1,895 to 3,654)     | 50.7   | (35.1 to 68.4)       |
| Honduras | Deaths  | Male   | 1990 | 743     | (575 to 1,143)       | 85.4   | (67.2 to 129.3)      |
|          |         |        | 2013 | 1,635   | (1,110 to 2,579)     | 89.1   | (61.3 to 138.0)      |
|          |         | Female | 1990 | 883     | (674 to 1,104)       | 90.6   | (70.2 to 113.3)      |
|          |         |        | 2013 | 1,966   | (1,265 to 2,717)     | 92.1   | (58.4 to 126.4)      |
|          |         |        |      |         |                      |        | Uncertainty Interval |
| Country  | measure | sex    | year | number  | Uncertainty Interval | Rate   | Interval             |
|          |         | Both   | 1990 | 1,627   | (1,382 to 2,123)     | 88.4   | (76.0 to 113.4)      |
|          |         |        | 2013 | 3,602   | (2,659 to 4,824)     | 91.1   | (67.6 to 120.1)      |



|         |        |        |      |         |                      |        |                    |
|---------|--------|--------|------|---------|----------------------|--------|--------------------|
|         | DALYs  | Male   | 1990 | 21,418  | (16,045 to 34,184)   | 1613.8 | (1244.7 to 2478.9) |
|         |        |        | 2013 | 34,894  | (23,052 to 57,264)   | 1557.5 | (1036.6 to 2483.7) |
|         |        | Female | 1990 | 23,329  | (16,849 to 30,061)   | 1677.6 | (1280.1 to 2102.1) |
|         |        |        | 2013 | 36,134  | (22,407 to 52,237)   | 1495.9 | (944.7 to 2125.9)  |
|         |        | Both   | 1990 | 44,747  | (36,460 to 60,592)   | 1647.2 | (1380.8 to 2179.8) |
|         |        |        | 2013 | 71,028  | (50,178 to 99,533)   | 1529.3 | (1106.7 to 2087.8) |
|         | YLDs   | Male   | 1990 | 277     | (188 to 386)         | 26.4   | (17.9 to 37.6)     |
|         |        |        | 2013 | 618     | (416 to 832)         | 28.1   | (19.1 to 38.7)     |
|         |        | Female | 1990 | 201     | (132 to 280)         | 18.5   | (11.8 to 25.9)     |
|         |        |        | 2013 | 449     | (303 to 630)         | 19.1   | (12.8 to 26.9)     |
|         |        | Both   | 1990 | 478     | (325 to 646)         | 22.4   | (15.1 to 30.2)     |
|         |        |        | 2013 | 1,068   | (750 to 1,437)       | 23.4   | (16.4 to 31.5)     |
| Hungary | Deaths | Male   | 1990 | 10,240  | (8,852 to 11,767)    | 206.4  | (177.7 to 238.0)   |
|         |        |        | 2013 | 7,969   | (6,849 to 9,402)     | 128.7  | (110.3 to 151.5)   |
|         |        | Female | 1990 | 13,126  | (10,381 to 14,586)   | 158.6  | (124.9 to 176.1)   |
|         |        |        | 2013 | 9,983   | (8,489 to 14,154)    | 82.3   | (70.5 to 116.9)    |
|         |        | Both   | 1990 | 23,366  | (20,688 to 25,405)   | 178.5  | (158.2 to 194.9)   |
|         |        |        | 2013 | 17,953  | (15,984 to 22,316)   | 100.4  | (89.5 to 124.0)    |
|         | DALYs  | Male   | 1990 | 186,914 | (161,717 to 217,696) | 3485.4 | (3014.2 to 4039.8) |
|         |        |        | 2013 | 126,316 | (107,811 to 147,785) | 2002.8 | (1714.4 to 2337.2) |
|         |        | Female | 1990 | 184,373 | (145,937 to 200,881) | 2336.5 | (1844.2 to 2542.5) |
|         |        |        | 2013 | 110,630 | (95,596 to 157,263)  | 1063.5 | (919.6 to 1518.1)  |
|         |        | Both   | 1990 | 371,288 | (328,060 to 405,337) | 2831.3 | (2504.9 to 3089.9) |
|         |        |        | 2013 | 236,947 | (212,934 to 288,385) | 1454.9 | (1306.4 to 1756.0) |
|         | YLDs   | Male   | 1990 | 1,702   | (1,105 to 2,360)     | 30.9   | (20.1 to 43.0)     |
|         |        |        | 2013 | 2,098   | (1,390 to 2,931)     | 33.6   | (22.4 to 46.5)     |
|         |        | Female | 1990 | 1,675   | (1,096 to 2,344)     | 22.8   | (14.8 to 32.1)     |
|         |        |        | 2013 | 1,857   | (1,225 to 2,600)     | 21.2   | (13.9 to 29.8)     |

|         |         | Both   | 1990 | 3,378     | (2,260 to 4,457)     | 26.4  | (17.7 to 34.8)     |
|---------|---------|--------|------|-----------|----------------------|-------|--------------------|
|         |         |        | 2013 | 3,955     | (2,731 to 5,395)     | 26.6  | (18.4 to 36.1)     |
| Iceland | Deaths  | Male   | 1990 | 74        | (60 to 93)           | 64    | (52.2 to 80.1)     |
|         |         |        | 2013 | 79        | (58 to 100)          | 39.1  | (28.8 to 49.7)     |
|         |         | Female | 1990 | 99        | (80 to 121)          | 61.8  | (50.1 to 75.7)     |
|         |         |        | 2013 | 95        | (73 to 121)          | 33.6  | (25.8 to 42.4)     |
|         |         | Both   | 1990 | 173       | (152 to 202)         | 63    | (55.4 to 73.3)     |
|         |         |        | 2013 | 175       | (142 to 209)         | 36.3  | (29.5 to 43.0)     |
|         | DALYs   | Male   | 1990 | 1,149     | (968 to 1,399)       | 967.8 | (814.6 to 1178.7)  |
|         |         |        | 2013 | 1,118     | (854 to 1,386)       | 574.2 | (437.6 to 714.5)   |
|         |         | Female | 1990 | 1,242     | (1,014 to 1,481)     | 854.8 | (696.3 to 1021.9)  |
|         |         |        | 2013 | 974       | (771 to 1,188)       | 408.7 | (325.1 to 499.8)   |
|         |         |        |      |           |                      |       | Uncertainty        |
| Country | measure | sex    | year | number    | Uncertainty Interval | Rate  | Interval           |
|         |         | Both   | 1990 | 2,391     | (2,139 to 2,715)     | 906.9 | (809.5 to 1026.6)  |
|         |         |        | 2013 | 2,092     | (1,739 to 2,437)     | 487.7 | (404.0 to 570.7)   |
|         | YLDs    | Male   | 1990 | 120       | (78 to 170)          | 101.4 | (65.9 to 143.0)    |
|         |         |        | 2013 | 205       | (141 to 288)         | 106.4 | (73.2 to 148.7)    |
|         |         | Female | 1990 | 108       | (72 to 148)          | 77.7  | (51.9 to 105.7)    |
|         |         |        | 2013 | 155       | (101 to 225)         | 71.3  | (47.3 to 103.4)    |
|         |         | Both   | 1990 | 229       | (157 to 307)         | 88.6  | (60.7 to 119.1)    |
|         |         |        | 2013 | 360       | (245 to 489)         | 88.1  | (60.2 to 119.1)    |
| India   | Deaths  | Male   | 1990 | 205,140   | (164,823 to 249,155) | 109.5 | (87.7 to 132.6)    |
|         |         |        | 2013 | 365,297   | (286,511 to 465,499) | 109.8 | (87.0 to 139.2)    |
|         |         | Female | 1990 | 208,439   | (153,149 to 243,557) | 116.7 | (85.9 to 135.4)    |
|         |         |        | 2013 | 348,918   | (249,980 to 433,870) | 99.1  | (71.9 to 121.3)    |
|         |         | Both   | 1990 | 413,579   | (346,014 to 473,116) | 113.3 | (94.2 to 129.0)    |
|         |         |        | 2013 | 714,215   | (590,159 to 841,167) | 104.5 | (86.2 to 121.8)    |
|         | DALYs   | Male   | 1990 | 5,303,689 | (4,295,763 to        | 2129  | (1716.9 to 2576.1) |

|           |        |        |      |            |                            |        |                    |
|-----------|--------|--------|------|------------|----------------------------|--------|--------------------|
|           |        |        |      |            | 6,434,369)                 |        |                    |
|           |        |        | 2013 | 8,523,060  | (6,563,543 to 10,980,735)  | 2023.3 | (1579.1 to 2564.7) |
|           |        | Female | 1990 | 5,027,199  | (3,696,535 to 5,925,911)   | 2129.8 | (1569.3 to 2492.5) |
|           |        |        | 2013 | 6,880,827  | (4,763,513 to 8,768,688)   | 1639.1 | (1159.5 to 2057.4) |
|           |        | Both   | 1990 | 10,330,888 | (8,597,565 to 11,898,336)  | 2131.4 | (1784.0 to 2443.4) |
|           |        |        | 2013 | 15,403,888 | (12,643,000 to 18,446,373) | 1831.4 | (1511.3 to 2161.1) |
|           | YLDs   | Male   | 1990 | 110,023    | (76,279 to 149,594)        | 42.3   | (29.5 to 57.7)     |
|           |        |        | 2013 | 198,460    | (133,355 to 271,598)       | 43.3   | (29.4 to 60.0)     |
|           |        | Female | 1990 | 86,931     | (58,259 to 117,698)        | 34.3   | (23.1 to 46.8)     |
|           |        |        | 2013 | 166,710    | (107,989 to 234,701)       | 35.6   | (23.3 to 49.7)     |
|           |        | Both   | 1990 | 196,955    | (136,268 to 261,352)       | 38.3   | (26.8 to 50.5)     |
|           |        |        | 2013 | 365,171    | (250,006 to 490,584)       | 39.3   | (26.7 to 52.9)     |
| Indonesia | Deaths | Male   | 1990 | 62,470     | (54,333 to 71,376)         | 194.3  | (168.5 to 220.4)   |
|           |        |        | 2013 | 134,060    | (110,863 to 157,090)       | 214    | (178.9 to 247.9)   |
|           |        | Female | 1990 | 66,082     | (56,778 to 79,265)         | 177    | (148.0 to 209.3)   |
|           |        |        | 2013 | 155,856    | (125,126 to 179,636)       | 216.6  | (174.7 to 249.1)   |
|           |        | Both   | 1990 | 128,553    | (116,549 to 141,419)       | 184.9  | (165.0 to 204.6)   |
|           |        |        | 2013 | 289,917    | (256,355 to 321,575)       | 216.6  | (191.5 to 238.8)   |
|           | DALYs  | Male   | 1990 | 1,499,375  | (1,294,430 to 1,733,856)   | 3443.9 | (2992.0 to 3936.1) |
|           |        |        | 2013 | 3,059,116  | (2,468,232 to 3,632,739)   | 3764.6 | (3098.6 to 4409.0) |
|           |        | Female | 1990 | 1,429,799  | (1,247,026 to 1,778,326)   | 3009   | (2617.5 to 3650.4) |

| Country | measure | sex    | year | number    | Uncertainty Interval     | Rate   | Uncertainty Interval |
|---------|---------|--------|------|-----------|--------------------------|--------|----------------------|
|         |         |        | 2013 | 2,973,812 | (2,372,087 to 3,492,503) | 3458.5 | (2772.1 to 4018.1)   |
|         |         | Both   | 1990 | 2,929,174 | (2,674,041 to 3,296,528) | 3212.2 | (2921.9 to 3542.6)   |
|         |         |        | 2013 | 6,032,928 | (5,247,260 to 6,823,554) | 3617.7 | (3181.2 to 4024.1)   |
|         | YLDs    | Male   | 1990 | 24,066    | (16,326 to 32,276)       | 59.2   | (40.2 to 78.9)       |
|         |         |        | 2013 | 45,166    | (28,603 to 64,117)       | 58.7   | (36.4 to 85.0)       |
|         |         | Female | 1990 | 20,444    | (13,424 to 28,628)       | 44.8   | (28.9 to 63.5)       |
|         |         |        | 2013 | 40,208    | (27,389 to 55,545)       | 47.7   | (32.3 to 65.8)       |
|         |         | Both   | 1990 | 44,511    | (30,823 to 58,788)       | 51.4   | (35.5 to 68.1)       |
|         |         |        | 2013 | 85,374    | (58,950 to 116,090)      | 52.9   | (36.2 to 71.9)       |
| Iran    | Deaths  | Male   | 1990 | 13,342    | (10,795 to 16,564)       | 142.4  | (115.6 to 174.0)     |
|         |         |        | 2013 | 13,224    | (10,183 to 16,938)       | 63.4   | (49.3 to 80.0)       |
|         |         | Female | 1990 | 10,211    | (8,399 to 11,758)        | 122.4  | (104.2 to 143.8)     |
|         |         |        | 2013 | 15,226    | (9,925 to 18,543)        | 77     | (49.6 to 93.1)       |
|         |         | Both   | 1990 | 23,553    | (20,440 to 27,277)       | 132.8  | (116.9 to 151.6)     |
|         |         |        | 2013 | 28,451    | (22,243 to 33,055)       | 69.9   | (55.0 to 81.2)       |
|         | DALYs   | Male   | 1990 | 338,896   | (272,640 to 431,277)     | 2425.9 | (1955.2 to 3013.3)   |
|         |         |        | 2013 | 221,613   | (168,804 to 291,008)     | 896.3  | (687.5 to 1165.4)    |
|         |         | Female | 1990 | 267,798   | (199,175 to 311,720)     | 1916.4 | (1580.9 to 2239.3)   |
|         |         |        | 2013 | 224,592   | (145,857 to 280,898)     | 938.9  | (604.1 to 1158.0)    |
|         |         | Both   | 1990 | 606,695   | (518,560 to 709,833)     | 2178.7 | (1879.0 to 2534.2)   |
|         |         |        | 2013 | 446,206   | (349,701 to 531,215)     | 915.8  | (718.9 to 1078.1)    |
|         | YLDs    | Male   | 1990 | 1,507     | (932 to 2,176)           | 10.1   | (6.1 to 14.7)        |
|         |         |        | 2013 | 4,164     | (2,784 to 5,759)         | 14.8   | (10.0 to 20.3)       |
|         |         | Female | 1990 | 1,249     | (814 to 1,781)           | 9      | (5.8 to 12.8)        |

|                |                |            |             |               |                             |             |                             |
|----------------|----------------|------------|-------------|---------------|-----------------------------|-------------|-----------------------------|
|                |                |            | 2013        | 3,617         | (2,476 to 4,971)            | 12.6        | (8.7 to 17.2)               |
|                |                | Both       | 1990        | 2,756         | (1,862 to 3,820)            | 9.6         | (6.5 to 13.3)               |
|                |                |            | 2013        | 7,782         | (5,395 to 10,550)           | 13.6        | (9.5 to 18.5)               |
| Iraq           | Deaths         | Male       | 1990        | 4,864         | (3,680 to 6,202)            | 155.1       | (117.8 to 196.0)            |
|                |                |            | 2013        | 7,092         | (5,056 to 9,869)            | 139.8       | (101.2 to 190.7)            |
|                |                | Female     | 1990        | 5,975         | (4,635 to 7,837)            | 170.3       | (132.4 to 219.9)            |
|                |                |            | 2013        | 10,305        | (7,552 to 13,399)           | 163.9       | (121.8 to 209.5)            |
|                |                | Both       | 1990        | 10,840        | (8,906 to 13,054)           | 163.6       | (135.7 to 194.6)            |
|                |                |            | 2013        | 17,398        | (13,940 to 21,085)          | 154.1       | (124.3 to 184.2)            |
|                | DALYs          | Male       | 1990        | 118,200       | (87,913 to 151,522)         | 2653.9      | (1962.4 to 3460.9)          |
|                |                |            | 2013        | 168,561       | (118,571 to 237,119)        | 2342        | (1656.6 to 3291.0)          |
|                |                | Female     | 1990        | 120,172       | (90,149 to 163,716)         | 2814.1      | (2128.5 to 3791.1)          |
|                |                |            | 2013        | 202,443       | (143,339 to 275,450)        | 2624.1      | (1875.2 to 3469.4)          |
|                |                | Both       | 1990        | 238,373       | (193,895 to 292,556)        | 2742.2      | (2235.0 to 3357.7)          |
|                |                |            | 2013        | 371,005       | (289,210 to 460,878)        | 2505.7      | (1969.5 to 3077.9)          |
|                | YLDs           | Male       | 1990        | 422           | (269 to 621)                | 10.4        | (6.5 to 15.2)               |
| <b>Country</b> | <b>measure</b> | <b>sex</b> | <b>year</b> | <b>number</b> | <b>Uncertainty Interval</b> | <b>Rate</b> | <b>Uncertainty Interval</b> |
|                |                |            | 2013        | 821           | (556 to 1,157)              | 10.4        | (7.0 to 14.5)               |
|                |                | Female     | 1990        | 354           | (229 to 489)                | 8.3         | (5.3 to 11.5)               |
|                |                |            | 2013        | 727           | (487 to 1,013)              | 8.4         | (5.6 to 11.5)               |
|                |                | Both       | 1990        | 777           | (515 to 1,062)              | 9.3         | (6.2 to 12.6)               |
|                |                |            | 2013        | 1,549         | (1,059 to 2,107)            | 9.3         | (6.5 to 12.5)               |
| Ireland        | Deaths         | Male       | 1990        | 1,274         | (1,054 to 1,579)            | 82.5        | (68.1 to 102.3)             |
|                |                |            | 2013        | 1,061         | (820 to 1,339)              | 43.7        | (33.8 to 55.2)              |
|                |                | Female     | 1990        | 1,828         | (1,415 to 2,111)            | 80.9        | (62.9 to 94.1)              |
|                |                |            | 2013        | 1,474         | (1,149 to 1,914)            | 42.4        | (33.3 to 55.7)              |
|                |                | Both       | 1990        | 3,102         | (2,692 to 3,504)            | 82.2        | (71.3 to 92.8)              |
|                |                |            | 2013        | 2,535         | (2,100 to 3,046)            | 43.3        | (35.9 to 51.9)              |

|        |        |        |      |        |                    |        |                    |
|--------|--------|--------|------|--------|--------------------|--------|--------------------|
|        | DALYs  | Male   | 1990 | 21,293 | (17,940 to 25,639) | 1299.7 | (1097.1 to 1572.2) |
|        |        |        | 2013 | 16,537 | (13,107 to 20,256) | 656.8  | (521.8 to 807.0)   |
|        |        | Female | 1990 | 24,134 | (19,165 to 27,903) | 1140   | (905.3 to 1328.7)  |
|        |        |        | 2013 | 16,660 | (13,404 to 21,466) | 535.6  | (431.7 to 696.5)   |
|        |        | Both   | 1990 | 45,428 | (40,165 to 51,060) | 1213.5 | (1075.7 to 1364.2) |
|        |        |        | 2013 | 33,197 | (28,188 to 39,088) | 593.3  | (505.9 to 696.1)   |
|        | YLDs   | Male   | 1990 | 1,805  | (1,214 to 2,477)   | 108.6  | (73.0 to 149.0)    |
|        |        |        | 2013 | 2,718  | (1,776 to 3,826)   | 105.8  | (69.0 to 149.3)    |
|        |        | Female | 1990 | 1,579  | (1,055 to 2,242)   | 76.9   | (51.4 to 108.1)    |
|        |        |        | 2013 | 2,178  | (1,472 to 3,017)   | 73.7   | (50.1 to 102.1)    |
|        |        | Both   | 1990 | 3,384  | (2,320 to 4,524)   | 91     | (62.8 to 121.4)    |
|        |        |        | 2013 | 4,896  | (3,321 to 6,656)   | 88.8   | (60.3 to 120.6)    |
| Israel | Deaths | Male   | 1990 | 1,238  | (1,018 to 1,637)   | 71.3   | (58.4 to 94.4)     |
|        |        |        | 2013 | 1,008  | (670 to 1,282)     | 26.4   | (17.6 to 33.5)     |
|        |        | Female | 1990 | 1,464  | (1,189 to 1,820)   | 69.6   | (56.4 to 86.5)     |
|        |        |        | 2013 | 1,672  | (1,022 to 2,228)   | 29.7   | (18.4 to 39.7)     |
|        |        | Both   | 1990 | 2,702  | (2,395 to 3,225)   | 70.5   | (62.5 to 84.2)     |
|        |        |        | 2013 | 2,680  | (1,867 to 3,240)   | 28.6   | (19.9 to 34.4)     |
|        | DALYs  | Male   | 1990 | 19,937 | (16,699 to 26,322) | 1125.3 | (941.3 to 1479.3)  |
|        |        |        | 2013 | 15,170 | (10,577 to 18,473) | 408.3  | (284.9 to 497.6)   |
|        |        | Female | 1990 | 20,762 | (17,332 to 25,533) | 987.8  | (824.6 to 1210.8)  |
|        |        |        | 2013 | 17,359 | (11,609 to 22,727) | 352.5  | (238.8 to 462.4)   |
|        |        | Both   | 1990 | 40,700 | (36,252 to 48,557) | 1052.6 | (937.5 to 1257.2)  |
|        |        |        | 2013 | 32,530 | (24,575 to 38,059) | 380.7  | (288.0 to 443.8)   |
|        | YLDs   | Male   | 1990 | 1,248  | (852 to 1,662)     | 69.9   | (47.6 to 93.2)     |
|        |        |        | 2013 | 2,719  | (1,800 to 3,772)   | 73.4   | (49.0 to 101.6)    |
|        |        | Female | 1990 | 1,266  | (829 to 1,755)     | 60.8   | (39.8 to 83.9)     |
|        |        |        | 2013 | 2,462  | (1,692 to 3,365)   | 53.9   | (37.0 to 72.9)     |

|         |         |        |      |         |                        |        |                      |
|---------|---------|--------|------|---------|------------------------|--------|----------------------|
|         |         | Both   | 1990 | 2,515   | (1,711 to 3,341)       | 65     | (44.0 to 86.4)       |
|         |         |        | 2013 | 5,182   | (3,612 to 6,926)       | 62.8   | (44.0 to 83.7)       |
| Italy   | Deaths  | Male   | 1990 | 31,410  | (26,611 to 36,525)     | 99.4   | (84.1 to 115.7)      |
|         |         |        |      |         |                        |        | Uncertainty Interval |
| Country | measure | sex    | year | number  | Uncertainty Interval   | Rate   | Interval             |
|         |         |        | 2013 | 27,869  | (22,097 to 33,813)     | 47.1   | (37.4 to 57.1)       |
|         |         | Female | 1990 | 44,686  | (35,462 to 49,382)     | 83.2   | (66.0 to 91.5)       |
|         |         |        | 2013 | 42,687  | (34,491 to 55,687)     | 42.1   | (34.3 to 55.2)       |
|         |         | Both   | 1990 | 76,097  | (66,326 to 83,467)     | 90.2   | (78.7 to 99.0)       |
|         |         |        | 2013 | 70,556  | (60,359 to 82,030)     | 44.6   | (38.2 to 51.5)       |
|         | DALYs   | Male   | 1990 | 480,657 | (413,775 to 553,322)   | 1461.8 | (1261.8 to 1681.4)   |
|         |         |        | 2013 | 344,645 | (282,741 to 410,270)   | 644.3  | (525.8 to 766.3)     |
|         |         | Female | 1990 | 507,137 | (411,188 to 553,272)   | 1047.3 | (849.5 to 1150.4)    |
|         |         |        | 2013 | 365,507 | (304,813 to 469,890)   | 462.8  | (387.2 to 598.1)     |
|         |         | Both   | 1990 | 987,795 | (883,151 to 1,079,234) | 1226.4 | (1098.1 to 1340.0)   |
|         |         |        | 2013 | 710,153 | (618,687 to 807,266)   | 545    | (475.4 to 619.9)     |
|         | YLDs    | Male   | 1990 | 29,795  | (20,325 to 41,669)     | 88.4   | (60.9 to 123.4)      |
|         |         |        | 2013 | 37,836  | (24,962 to 51,521)     | 74.8   | (49.4 to 101.6)      |
|         |         | Female | 1990 | 23,579  | (16,229 to 32,260)     | 51.2   | (35.6 to 69.3)       |
|         |         |        | 2013 | 28,329  | (17,988 to 40,393)     | 44.3   | (29.1 to 61.7)       |
|         |         | Both   | 1990 | 53,374  | (36,938 to 70,987)     | 67     | (46.3 to 89.6)       |
|         |         |        | 2013 | 66,166  | (45,170 to 88,779)     | 58     | (39.7 to 76.8)       |
| Jamaica | Deaths  | Male   | 1990 | 881     | (761 to 1,008)         | 117.1  | (100.9 to 134.3)     |
|         |         |        | 2013 | 1,093   | (833 to 1,378)         | 105.4  | (80.5 to 133.0)      |
|         |         | Female | 1990 | 1,433   | (1,213 to 1,746)       | 146.2  | (123.7 to 177.7)     |
|         |         |        | 2013 | 1,681   | (1,250 to 2,120)       | 120.3  | (89.6 to 152.7)      |
|         |         | Both   | 1990 | 2,315   | (2,064 to 2,644)       | 133.9  | (119.3 to 153.0)     |
|         |         |        | 2013 | 2,774   | (2,260 to 3,291)       | 114.8  | (93.2 to 136.4)      |
|         | DALYs   | Male   | 1990 | 15,368  | (13,447 to 17,610)     | 1938.7 | (1695.1 to 2218.0)   |

|         |         |        |      |           |                          |        |                      |
|---------|---------|--------|------|-----------|--------------------------|--------|----------------------|
|         |         |        | 2013 | 18,492    | (14,008 to 23,576)       | 1670.2 | (1264.3 to 2128.8)   |
|         |         | Female | 1990 | 20,695    | (17,414 to 24,168)       | 2227.5 | (1878.0 to 2604.8)   |
|         |         |        | 2013 | 22,069    | (16,505 to 28,875)       | 1689.3 | (1246.9 to 2219.0)   |
|         |         | Both   | 1990 | 36,064    | (32,380 to 40,260)       | 2101.5 | (1885.5 to 2342.9)   |
|         |         |        | 2013 | 40,562    | (33,261 to 48,457)       | 1691.2 | (1386.3 to 2021.5)   |
|         | YLDs    | Male   | 1990 | 479       | (327 to 653)             | 62.9   | (42.8 to 85.7)       |
|         |         |        | 2013 | 660       | (446 to 959)             | 60.3   | (40.7 to 86.9)       |
|         |         | Female | 1990 | 373       | (238 to 525)             | 41     | (26.3 to 57.6)       |
|         |         |        | 2013 | 526       | (338 to 744)             | 40.6   | (26.4 to 57.4)       |
|         |         | Both   | 1990 | 852       | (594 to 1,129)           | 51.1   | (35.6 to 67.7)       |
|         |         |        | 2013 | 1,187     | (812 to 1,608)           | 49.6   | (34.1 to 67.5)       |
| Japan   | Deaths  | Male   | 1990 | 60,064    | (53,539 to 67,711)       | 106    | (93.9 to 119.8)      |
|         |         |        | 2013 | 85,537    | (71,303 to 99,514)       | 62.8   | (52.3 to 73.0)       |
|         |         | Female | 1990 | 71,040    | (58,347 to 80,114)       | 82.8   | (68.0 to 93.4)       |
|         |         |        | 2013 | 100,039   | (81,366 to 141,583)      | 42.8   | (35.3 to 60.2)       |
|         |         | Both   | 1990 | 131,104   | (118,833 to 142,701)     | 92.7   | (83.8 to 101.2)      |
|         |         |        | 2013 | 185,577   | (163,108 to 228,573)     | 51.8   | (45.8 to 62.9)       |
|         | DALYs   | Male   | 1990 | 1,051,122 | (936,413 to 1,173,900)   | 1657   | (1477.7 to 1851.7)   |
|         |         |        |      |           |                          |        | Uncertainty Interval |
| Country | measure | sex    | year | number    | Uncertainty Interval     | Rate   | Interval             |
|         |         |        | 2013 | 1,187,336 | (1,011,607 to 1,355,752) | 1004.5 | (854.3 to 1150.4)    |
|         |         | Female | 1990 | 902,537   | (740,983 to 1,000,591)   | 1069.2 | (878.0 to 1189.2)    |
|         |         |        | 2013 | 897,168   | (760,465 to 1,220,113)   | 533.4  | (453.2 to 720.3)     |
|         |         | Both   | 1990 | 1,953,659 | (1,785,194 to 2,107,863) | 1329.3 | (1214.9 to 1435.0)   |
|         |         |        | 2013 | 2,084,505 | (1,868,717 to 2,421,503) | 751.7  | (670.3 to 860.7)     |
|         | YLDs    | Male   | 1990 | 76,635    | (52,495 to 105,531)      | 120.2  | (82.9 to 164.8)      |



|            |        |        |      |         |                      |        |                    |
|------------|--------|--------|------|---------|----------------------|--------|--------------------|
|            |        |        | 2013 | 139,785 | (92,568 to 190,150)  | 116.3  | (77.8 to 158.6)    |
|            |        | Female | 1990 | 61,646  | (41,888 to 84,156)   | 73.1   | (49.7 to 99.7)     |
|            |        |        | 2013 | 117,166 | (78,258 to 161,045)  | 74.7   | (50.6 to 103.3)    |
|            |        | Both   | 1990 | 138,281 | (95,988 to 184,549)  | 93.4   | (64.9 to 124.4)    |
|            |        |        | 2013 | 256,951 | (178,079 to 343,784) | 93.7   | (65.6 to 125.3)    |
| Jordan     | Deaths | Male   | 1990 | 931     | (740 to 1,196)       | 162.7  | (130.5 to 208.7)   |
|            |        |        | 2013 | 973     | (767 to 1,232)       | 91.7   | (73.4 to 113.9)    |
|            |        | Female | 1990 | 829     | (662 to 1,016)       | 155.2  | (124.2 to 190.6)   |
|            |        |        | 2013 | 998     | (800 to 1,197)       | 94.5   | (77.2 to 112.5)    |
|            |        | Both   | 1990 | 1,760   | (1,499 to 2,063)     | 159    | (135.7 to 186.9)   |
|            |        |        | 2013 | 1,972   | (1,689 to 2,269)     | 93.5   | (80.7 to 106.7)    |
|            | DALYs  | Male   | 1990 | 17,082  | (13,297 to 22,150)   | 2487.8 | (1938.9 to 3236.6) |
|            |        |        | 2013 | 17,945  | (13,681 to 23,332)   | 1225.4 | (959.6 to 1560.7)  |
|            |        | Female | 1990 | 14,767  | (11,703 to 18,072)   | 2284   | (1815.2 to 2834.1) |
|            |        |        | 2013 | 16,112  | (12,443 to 19,931)   | 1141.6 | (906.5 to 1367.7)  |
|            |        | Both   | 1990 | 31,849  | (26,864 to 37,551)   | 2387.5 | (2024.0 to 2826.6) |
|            |        |        | 2013 | 34,058  | (28,417 to 40,052)   | 1185.7 | (1011.5 to 1370.0) |
|            | YLDs   | Male   | 1990 | 82      | (55 to 117)          | 10.9   | (7.2 to 15.6)      |
|            |        |        | 2013 | 231     | (148 to 330)         | 11.5   | (7.5 to 16.5)      |
|            |        | Female | 1990 | 60      | (38 to 86)           | 8.4    | (5.4 to 12.2)      |
|            |        |        | 2013 | 167     | (107 to 242)         | 8.5    | (5.5 to 12.2)      |
|            |        | Both   | 1990 | 143     | (97 to 192)          | 9.7    | (6.6 to 12.9)      |
|            |        |        | 2013 | 399     | (267 to 555)         | 10     | (6.8 to 14.0)      |
| Kazakhstan | Deaths | Male   | 1990 | 8,538   | (7,210 to 9,893)     | 254.6  | (216.4 to 293.0)   |
|            |        |        | 2013 | 11,472  | (9,488 to 13,816)    | 268.8  | (225.8 to 317.8)   |
|            |        | Female | 1990 | 14,183  | (12,408 to 16,250)   | 211.2  | (183.9 to 242.6)   |
|            |        |        | 2013 | 15,612  | (11,789 to 18,007)   | 216.1  | (162.3 to 248.6)   |
|            |        | Both   | 1990 | 22,722  | (20,364 to 25,226)   | 227.7  | (204.2 to 252.5)   |

|         |         |        | 2013 | 27,085  | (22,740 to 30,505)   | 238.5  | (199.0 to 266.3)     |
|---------|---------|--------|------|---------|----------------------|--------|----------------------|
|         | DALYs   | Male   | 1990 | 190,471 | (159,236 to 224,952) | 4429.6 | (3724.1 to 5142.3)   |
|         |         |        | 2013 | 261,742 | (212,199 to 324,703) | 4820.2 | (3969.6 to 5844.1)   |
|         |         | Female | 1990 | 225,828 | (198,131 to 260,790) | 3241.5 | (2845.8 to 3751.6)   |
|         |         |        | 2013 | 254,157 | (191,015 to 299,243) | 3259.1 | (2448.1 to 3819.5)   |
|         |         | Both   | 1990 | 416,300 | (376,414 to 464,537) | 3711.4 | (3347.8 to 4137.9)   |
| Country | measure | sex    | year | number  | Uncertainty Interval | Rate   | Uncertainty Interval |
|         |         |        | 2013 | 515,899 | (439,453 to 590,439) | 3920.2 | (3332.9 to 4464.7)   |
|         | YLDs    | Male   | 1990 | 891     | (566 to 1,257)       | 17.4   | (11.3 to 24.3)       |
|         |         |        | 2013 | 1,053   | (700 to 1,509)       | 17.3   | (11.6 to 24.7)       |
|         |         | Female | 1990 | 936     | (621 to 1,329)       | 13.1   | (8.6 to 18.6)        |
|         |         |        | 2013 | 1,015   | (675 to 1,404)       | 12.4   | (8.2 to 17.2)        |
|         |         | Both   | 1990 | 1,827   | (1,253 to 2,477)     | 15     | (10.2 to 20.3)       |
|         |         |        | 2013 | 2,069   | (1,439 to 2,783)     | 14.4   | (10.0 to 19.3)       |
| Kenya   | Deaths  | Male   | 1990 | 2,895   | (2,359 to 3,420)     | 96.3   | (78.5 to 115.8)      |
|         |         |        | 2013 | 5,427   | (4,276 to 6,671)     | 95.8   | (75.4 to 115.1)      |
|         |         | Female | 1990 | 3,774   | (2,807 to 4,585)     | 120.2  | (88.8 to 148.9)      |
|         |         |        | 2013 | 6,116   | (4,293 to 7,913)     | 98.2   | (69.3 to 127.1)      |
|         |         | Both   | 1990 | 6,669   | (5,470 to 7,742)     | 109.1  | (88.5 to 127.9)      |
|         |         |        | 2013 | 11,544  | (9,319 to 13,732)    | 97.5   | (78.7 to 115.9)      |
|         | DALYs   | Male   | 1990 | 59,969  | (48,476 to 71,010)   | 1560.5 | (1270.9 to 1843.3)   |
|         |         |        | 2013 | 113,668 | (88,542 to 144,285)  | 1522.9 | (1194.2 to 1879.5)   |
|         |         | Female | 1990 | 69,679  | (52,561 to 83,220)   | 1803.6 | (1352.9 to 2184.7)   |
|         |         |        | 2013 | 106,376 | (75,882 to 140,935)  | 1345.8 | (960.1 to 1774.4)    |
|         |         | Both   | 1990 | 129,648 | (106,806 to 149,325) | 1688.8 | (1390.3 to 1954.0)   |
|         |         |        | 2013 | 220,045 | (177,305 to 267,448) | 1432.2 | (1168.2 to 1708.5)   |
|         | YLDs    | Male   | 1990 | 631     | (399 to 897)         | 13     | (8.2 to 18.7)        |
|         |         |        | 2013 | 1,426   | (866 to 2,109)       | 14     | (8.3 to 20.5)        |

|          |         |        |      |        |                      |        |                      |
|----------|---------|--------|------|--------|----------------------|--------|----------------------|
|          |         | Female | 1990 | 454    | (290 to 682)         | 9.1    | (5.8 to 13.7)        |
|          |         |        | 2013 | 1,001  | (642 to 1,447)       | 9.2    | (6.0 to 13.2)        |
|          |         | Both   | 1990 | 1,086  | (712 to 1,510)       | 11     | (7.2 to 15.7)        |
|          |         |        | 2013 | 2,427  | (1,580 to 3,335)     | 11.4   | (7.5 to 15.9)        |
| Kiribati | Deaths  | Male   | 1990 | 37     | (28 to 47)           | 266.6  | (206.6 to 325.3)     |
|          |         |        | 2013 | 76     | (51 to 104)          | 308.5  | (218.2 to 398.0)     |
|          |         | Female | 1990 | 18     | (13 to 27)           | 110.2  | (80.5 to 168.9)      |
|          |         |        | 2013 | 37     | (22 to 55)           | 137.7  | (82.3 to 200.2)      |
|          |         | Both   | 1990 | 55     | (45 to 68)           | 178.2  | (147.1 to 218.0)     |
|          |         |        | 2013 | 114    | (83 to 148)          | 212.2  | (158.8 to 266.1)     |
|          | DALYs   | Male   | 1990 | 1,241  | (940 to 1,567)       | 6309   | (4786.9 to 7949.4)   |
|          |         |        | 2013 | 2,402  | (1,615 to 3,364)     | 7187.7 | (4905.6 to 9766.7)   |
|          |         | Female | 1990 | 496    | (361 to 764)         | 2374.9 | (1719.5 to 3655.2)   |
|          |         |        | 2013 | 914    | (530 to 1,387)       | 2704   | (1590.8 to 4023.4)   |
|          |         | Both   | 1990 | 1,737  | (1,401 to 2,150)     | 4180.2 | (3401.0 to 5152.6)   |
|          |         |        | 2013 | 3,317  | (2,359 to 4,439)     | 4787.5 | (3492.4 to 6258.2)   |
|          | YLDs    | Male   | 1990 | 7      | (5 to 10)            | 56.5   | (37.8 to 77.4)       |
|          |         |        | 2013 | 14     | (9 to 19)            | 58.1   | (38.3 to 80.0)       |
|          |         | Female | 1990 | 6      | (4 to 9)             | 38.4   | (25.2 to 53.2)       |
|          |         |        | 2013 | 12     | (8 to 17)            | 43.1   | (29.1 to 59.3)       |
|          |         | Both   | 1990 | 14     | (9 to 19)            | 46.1   | (31.8 to 62.0)       |
|          |         |        |      |        |                      |        | Uncertainty Interval |
| Country  | measure | sex    | year | number | Uncertainty Interval | Rate   | Uncertainty Interval |
|          |         |        | 2013 | 27     | (18 to 36)           | 49.6   | (34.3 to 65.5)       |
| Kuwait   | Deaths  | Male   | 1990 | 173    | (144 to 204)         | 81.1   | (67.4 to 97.2)       |
|          |         |        | 2013 | 343    | (276 to 413)         | 65.1   | (52.1 to 77.9)       |
|          |         | Female | 1990 | 144    | (118 to 177)         | 84.6   | (69.9 to 105.4)      |
|          |         |        | 2013 | 199    | (149 to 224)         | 71.5   | (52.7 to 82.0)       |
|          |         | Both   | 1990 | 317    | (280 to 356)         | 82.8   | (73.3 to 95.2)       |

|            |        |        |      |         |                      |        |                    |
|------------|--------|--------|------|---------|----------------------|--------|--------------------|
|            |        |        | 2013 | 543     | (459 to 617)         | 66.7   | (55.6 to 76.1)     |
|            | DALYs  | Male   | 1990 | 4,843   | (4,012 to 5,729)     | 1170.7 | (981.2 to 1378.0)  |
|            |        |        | 2013 | 7,136   | (5,851 to 8,704)     | 865.5  | (702.6 to 1035.2)  |
|            |        | Female | 1990 | 3,800   | (3,039 to 4,573)     | 1208.7 | (999.5 to 1472.7)  |
|            |        |        | 2013 | 4,340   | (3,227 to 4,965)     | 872.2  | (654.2 to 980.6)   |
|            |        | Both   | 1990 | 8,643   | (7,568 to 9,768)     | 1184.9 | (1048.4 to 1323.9) |
|            |        |        | 2013 | 11,476  | (9,741 to 13,158)    | 861.6  | (725.7 to 981.4)   |
|            | YLDs   | Male   | 1990 | 61      | (39 to 90)           | 10.7   | (7.0 to 15.4)      |
|            |        |        | 2013 | 134     | (88 to 191)          | 11.3   | (7.5 to 15.6)      |
|            |        | Female | 1990 | 32      | (20 to 46)           | 9      | (5.7 to 12.9)      |
|            |        |        | 2013 | 61      | (39 to 85)           | 8.9    | (5.8 to 12.4)      |
|            |        | Both   | 1990 | 94      | (62 to 129)          | 10     | (6.7 to 14.0)      |
|            |        |        | 2013 | 196     | (131 to 265)         | 10.4   | (7.1 to 13.9)      |
| Kyrgyzstan | Deaths | Male   | 1990 | 2,244   | (1,935 to 2,544)     | 263.3  | (225.7 to 297.8)   |
|            |        |        | 2013 | 2,976   | (2,451 to 3,597)     | 251.1  | (207.6 to 301.0)   |
|            |        | Female | 1990 | 3,397   | (2,818 to 3,729)     | 227.2  | (188.5 to 247.4)   |
|            |        |        | 2013 | 3,076   | (2,598 to 3,745)     | 193.7  | (163.1 to 238.2)   |
|            |        | Both   | 1990 | 5,641   | (5,006 to 6,078)     | 241.9  | (212.6 to 260.7)   |
|            |        |        | 2013 | 6,052   | (5,362 to 6,941)     | 219    | (195.1 to 252.9)   |
|            | DALYs  | Male   | 1990 | 49,325  | (42,539 to 56,617)   | 4671   | (4019.6 to 5310.9) |
|            |        |        | 2013 | 69,483  | (57,160 to 84,374)   | 4768.1 | (3942.4 to 5768.1) |
|            |        | Female | 1990 | 56,450  | (48,760 to 64,093)   | 3611.5 | (3094.1 to 4077.5) |
|            |        |        | 2013 | 56,398  | (46,953 to 67,880)   | 3179.8 | (2655.4 to 3837.4) |
|            |        | Both   | 1990 | 105,776 | (96,248 to 115,432)  | 4048.3 | (3656.7 to 4396.0) |
|            |        |        | 2013 | 125,881 | (110,275 to 143,367) | 3888.6 | (3417.0 to 4415.4) |
|            | YLDs   | Male   | 1990 | 203     | (134 to 280)         | 16.4   | (10.9 to 22.8)     |
|            |        |        | 2013 | 279     | (184 to 386)         | 16.6   | (11.3 to 22.9)     |
|            |        | Female | 1990 | 209     | (132 to 292)         | 12.9   | (8.1 to 18.2)      |

|         |         |        | 2013 | 249     | (162 to 343)         | 12.7   | (8.3 to 17.6)        |
|---------|---------|--------|------|---------|----------------------|--------|----------------------|
|         |         | Both   | 1990 | 413     | (269 to 551)         | 14.4   | (9.6 to 19.4)        |
|         |         |        | 2013 | 528     | (352 to 718)         | 14.5   | (9.8 to 19.6)        |
| Laos    | Deaths  | Male   | 1990 | 1,332   | (824 to 2,055)       | 179.2  | (116.3 to 271.0)     |
|         |         |        | 2013 | 2,284   | (1,511 to 3,461)     | 181.4  | (127.7 to 261.0)     |
|         |         | Female | 1990 | 1,480   | (972 to 2,275)       | 173.2  | (118.1 to 259.9)     |
|         |         |        | 2013 | 2,733   | (1,684 to 3,983)     | 187.7  | (122.5 to 266.3)     |
|         |         | Both   | 1990 | 2,812   | (1,845 to 4,324)     | 176.7  | (121.8 to 261.1)     |
| Country | measure | sex    | year | number  | Uncertainty Interval | Rate   | Uncertainty Interval |
|         |         |        | 2013 | 5,018   | (3,329 to 7,363)     | 185.7  | (130.5 to 263.1)     |
|         | DALYs   | Male   | 1990 | 39,785  | (24,665 to 60,899)   | 3656.7 | (2262.1 to 5693.8)   |
|         |         |        | 2013 | 59,030  | (37,289 to 92,624)   | 3433.4 | (2238.9 to 5263.9)   |
|         |         | Female | 1990 | 37,391  | (22,937 to 57,238)   | 3247.2 | (2066.5 to 5061.1)   |
|         |         |        | 2013 | 59,002  | (34,046 to 90,833)   | 3211.1 | (1930.4 to 4804.3)   |
|         |         | Both   | 1990 | 77,177  | (49,226 to 117,129)  | 3449   | (2252.1 to 5314.9)   |
|         |         |        | 2013 | 118,033 | (73,542 to 179,193)  | 3326.3 | (2159.5 to 4968.9)   |
|         | YLDs    | Male   | 1990 | 479     | (320 to 651)         | 58.6   | (39.1 to 80.0)       |
|         |         |        | 2013 | 832     | (550 to 1,157)       | 55.8   | (36.1 to 78.2)       |
|         |         | Female | 1990 | 415     | (277 to 559)         | 42.3   | (28.7 to 56.5)       |
|         |         |        | 2013 | 786     | (515 to 1,076)       | 46.5   | (30.8 to 64.9)       |
|         |         | Both   | 1990 | 894     | (614 to 1,201)       | 49.4   | (33.9 to 65.2)       |
|         |         |        | 2013 | 1,618   | (1,107 to 2,142)     | 50.8   | (34.9 to 68.1)       |
| Latvia  | Deaths  | Male   | 1990 | 2,342   | (2,035 to 2,710)     | 232.6  | (201.7 to 268.5)     |
|         |         |        | 2013 | 1,906   | (1,610 to 2,187)     | 159.1  | (134.2 to 182.9)     |
|         |         | Female | 1990 | 4,493   | (3,878 to 5,129)     | 198.2  | (171.0 to 225.9)     |
|         |         |        | 2013 | 3,168   | (2,802 to 3,931)     | 108.2  | (96.0 to 134.2)      |
|         |         | Both   | 1990 | 6,835   | (6,166 to 7,509)     | 211.4  | (190.5 to 232.4)     |
|         |         |        | 2013 | 5,074   | (4,607 to 5,869)     | 127    | (115.3 to 146.4)     |

|         |         |        |      |        |                      |        |                      |
|---------|---------|--------|------|--------|----------------------|--------|----------------------|
|         | DALYs   | Male   | 1990 | 41,111 | (35,530 to 48,193)   | 3697.5 | (3216.0 to 4301.5)   |
|         |         |        | 2013 | 30,684 | (25,897 to 35,175)   | 2500.5 | (2103.6 to 2875.1)   |
|         |         | Female | 1990 | 58,019 | (50,128 to 65,451)   | 2716.2 | (2338.0 to 3061.2)   |
|         |         |        | 2013 | 33,710 | (30,016 to 41,396)   | 1352.7 | (1194.0 to 1671.1)   |
|         |         | Both   | 1990 | 99,131 | (90,203 to 108,850)  | 3092.3 | (2818.6 to 3402.3)   |
|         |         |        | 2013 | 64,394 | (58,216 to 73,002)   | 1798.4 | (1618.1 to 2053.2)   |
|         | YLDs    | Male   | 1990 | 465    | (294 to 662)         | 37.8   | (24.3 to 53.9)       |
|         |         |        | 2013 | 554    | (349 to 805)         | 46.5   | (29.6 to 66.9)       |
|         |         | Female | 1990 | 509    | (329 to 705)         | 26.6   | (17.2 to 36.9)       |
|         |         |        | 2013 | 490    | (312 to 708)         | 25.8   | (16.5 to 37.2)       |
|         |         | Both   | 1990 | 975    | (646 to 1,317)       | 31.3   | (20.8 to 42.2)       |
|         |         |        | 2013 | 1,045  | (684 to 1,439)       | 34.3   | (22.4 to 47.1)       |
| Lebanon | Deaths  | Male   | 1990 | 450    | (352 to 588)         | 66.4   | (52.0 to 86.2)       |
|         |         |        | 2013 | 359    | (246 to 527)         | 20.5   | (14.0 to 30.1)       |
|         |         | Female | 1990 | 1,091  | (765 to 1,398)       | 136.3  | (96.3 to 174.3)      |
|         |         |        | 2013 | 1,711  | (678 to 2,457)       | 85.6   | (33.9 to 123.0)      |
|         |         | Both   | 1990 | 1,542  | (1,222 to 1,857)     | 103.3  | (81.6 to 124.0)      |
|         |         |        | 2013 | 2,071  | (1,019 to 2,829)     | 54.8   | (26.9 to 74.6)       |
|         | DALYs   | Male   | 1990 | 9,320  | (7,204 to 12,502)    | 1034.9 | (806.3 to 1371.8)    |
|         |         |        | 2013 | 5,606  | (3,868 to 8,192)     | 270.7  | (187.6 to 391.6)     |
|         |         | Female | 1990 | 21,079 | (14,081 to 27,368)   | 2201.4 | (1503.6 to 2837.5)   |
|         |         |        | 2013 | 23,682 | (9,102 to 34,677)    | 1131.6 | (435.4 to 1654.3)    |
|         |         | Both   | 1990 | 30,399 | (23,435 to 37,193)   | 1634.7 | (1278.6 to 1981.3)   |
|         |         |        |      |        |                      |        | Uncertainty Interval |
| Country | measure | sex    | year | number | Uncertainty Interval | Rate   | Interval             |
|         |         |        | 2013 | 29,289 | (14,415 to 41,125)   | 704.1  | (348.6 to 982.9)     |
|         | YLDs    | Male   | 1990 | 94     | (61 to 131)          | 10     | (6.6 to 13.8)        |
|         |         |        | 2013 | 245    | (159 to 351)         | 10.6   | (6.9 to 15.0)        |
|         |         | Female | 1990 | 78     | (52 to 110)          | 8      | (5.4 to 11.1)        |

|         |        |        |      |        |                    |        |                    |
|---------|--------|--------|------|--------|--------------------|--------|--------------------|
|         |        |        | 2013 | 186    | (120 to 269)       | 8.7    | (5.6 to 12.7)      |
|         |        | Both   | 1990 | 173    | (118 to 231)       | 9      | (6.2 to 11.9)      |
|         |        |        | 2013 | 432    | (294 to 591)       | 9.7    | (6.6 to 13.2)      |
| Lesotho | Deaths | Male   | 1990 | 391    | (296 to 485)       | 138.9  | (104.9 to 172.0)   |
|         |        |        | 2013 | 689    | (540 to 860)       | 185.5  | (145.9 to 230.0)   |
|         |        | Female | 1990 | 408    | (293 to 509)       | 112.9  | (82.9 to 140.7)    |
|         |        |        | 2013 | 651    | (465 to 968)       | 117.8  | (84.8 to 174.5)    |
|         |        | Both   | 1990 | 799    | (640 to 943)       | 124.2  | (98.7 to 146.4)    |
|         |        |        | 2013 | 1,340  | (1,089 to 1,699)   | 144.5  | (117.3 to 183.9)   |
|         | DALYs  | Male   | 1990 | 8,873  | (6,745 to 11,097)  | 2554.8 | (1931.6 to 3168.4) |
|         |        |        | 2013 | 17,058 | (13,314 to 21,195) | 3740.2 | (2919.0 to 4688.5) |
|         |        | Female | 1990 | 8,044  | (5,623 to 10,187)  | 1833   | (1311.8 to 2299.4) |
|         |        |        | 2013 | 13,743 | (9,534 to 21,638)  | 2088.2 | (1470.9 to 3191.1) |
|         |        | Both   | 1990 | 16,917 | (13,519 to 20,085) | 2146.1 | (1718.0 to 2543.6) |
|         |        |        | 2013 | 30,801 | (24,836 to 39,437) | 2750.3 | (2225.2 to 3505.4) |
|         | YLDs   | Male   | 1990 | 90     | (61 to 125)        | 24.7   | (17.0 to 34.6)     |
|         |        |        | 2013 | 111    | (73 to 153)        | 24.4   | (16.0 to 33.5)     |
|         |        | Female | 1990 | 112    | (72 to 160)        | 23.8   | (15.5 to 33.8)     |
|         |        |        | 2013 | 143    | (93 to 203)        | 23.1   | (15.0 to 33.0)     |
|         |        | Both   | 1990 | 203    | (138 to 276)       | 24.2   | (16.5 to 33.0)     |
|         |        |        | 2013 | 254    | (170 to 343)       | 23.7   | (15.8 to 32.3)     |
| Liberia | Deaths | Male   | 1990 | 422    | (326 to 515)       | 127.3  | (100.8 to 152.9)   |
|         |        |        | 2013 | 1,149  | (909 to 1,419)     | 185.7  | (148.0 to 222.9)   |
|         |        | Female | 1990 | 496    | (397 to 678)       | 148.4  | (120.9 to 199.0)   |
|         |        |        | 2013 | 1,272  | (910 to 1,880)     | 188.4  | (135.7 to 276.1)   |
|         |        | Both   | 1990 | 919    | (789 to 1,089)     | 138.5  | (120.0 to 162.9)   |
|         |        |        | 2013 | 2,422  | (2,001 to 3,040)   | 187.4  | (155.5 to 237.3)   |
|         | DALYs  | Male   | 1990 | 13,672 | (10,200 to 17,422) | 2376.9 | (1855.0 to 2897.0) |

|         |         |        | 2013 | 28,507 | (21,943 to 36,434)   | 3231.7 | (2549.4 to 3974.8)   |
|---------|---------|--------|------|--------|----------------------|--------|----------------------|
|         |         | Female | 1990 | 13,928 | (10,442 to 20,195)   | 2601.1 | (2101.4 to 3521.7)   |
|         |         |        | 2013 | 28,069 | (20,005 to 42,862)   | 3115.3 | (2231.1 to 4608.0)   |
|         |         | Both   | 1990 | 27,600 | (22,241 to 33,944)   | 2497.1 | (2151.2 to 2943.8)   |
|         |         |        | 2013 | 56,576 | (46,321 to 71,348)   | 3176.1 | (2628.0 to 3999.6)   |
|         | YLDs    | Male   | 1990 | 95     | (62 to 138)          | 20     | (13.3 to 28.6)       |
|         |         |        | 2013 | 189    | (126 to 263)         | 19.1   | (12.7 to 26.7)       |
|         |         | Female | 1990 | 74     | (49 to 106)          | 14.4   | (9.6 to 20.7)        |
|         |         |        | 2013 | 156    | (103 to 217)         | 14.5   | (9.6 to 20.1)        |
|         |         | Both   | 1990 | 169    | (115 to 240)         | 17.1   | (11.6 to 24.0)       |
| Country | measure | sex    | year | number | Uncertainty Interval | Rate   | Uncertainty Interval |
|         |         |        | 2013 | 346    | (235 to 468)         | 16.7   | (11.3 to 22.7)       |
| Libya   | Deaths  | Male   | 1990 | 826    | (636 to 1,076)       | 116.4  | (88.7 to 147.7)      |
|         |         |        | 2013 | 1,567  | (1,186 to 2,014)     | 116    | (88.1 to 147.4)      |
|         |         | Female | 1990 | 1,026  | (789 to 1,293)       | 145.9  | (114.3 to 180.9)     |
|         |         |        | 2013 | 2,110  | (1,522 to 2,756)     | 133.2  | (96.1 to 173.9)      |
|         |         | Both   | 1990 | 1,853  | (1,555 to 2,203)     | 131.5  | (111.1 to 156.3)     |
|         |         |        | 2013 | 3,677  | (2,959 to 4,477)     | 125.7  | (101.0 to 152.0)     |
|         | DALYs   | Male   | 1990 | 28,452 | (21,228 to 38,466)   | 2018.5 | (1554.2 to 2632.4)   |
|         |         |        | 2013 | 32,217 | (24,458 to 42,254)   | 1761.3 | (1331.0 to 2285.7)   |
|         |         | Female | 1990 | 31,712 | (22,765 to 41,376)   | 2507.8 | (1917.5 to 3174.7)   |
|         |         |        | 2013 | 37,765 | (26,925 to 49,589)   | 1936.5 | (1401.3 to 2552.3)   |
|         |         | Both   | 1990 | 60,165 | (48,457 to 73,395)   | 2255.5 | (1888.4 to 2681.5)   |
|         |         |        | 2013 | 69,983 | (56,354 to 85,590)   | 1855.4 | (1502.6 to 2262.9)   |
|         | YLDs    | Male   | 1990 | 30     | (18 to 47)           | 2.8    | (1.7 to 4.3)         |
|         |         |        | 2013 | 49     | (31 to 72)           | 2.4    | (1.6 to 3.6)         |
|         |         | Female | 1990 | 22     | (13 to 34)           | 2.4    | (1.5 to 3.6)         |
|         |         |        | 2013 | 45     | (28 to 68)           | 2.2    | (1.3 to 3.3)         |



|            |         |        |      |        |                      |        |                      |
|------------|---------|--------|------|--------|----------------------|--------|----------------------|
|            |         | Both   | 1990 | 52     | (33 to 77)           | 2.6    | (1.7 to 3.8)         |
|            |         |        | 2013 | 94     | (61 to 136)          | 2.3    | (1.5 to 3.3)         |
| Lithuania  | Deaths  | Male   | 1990 | 1,814  | (1,532 to 2,237)     | 122.2  | (103.1 to 150.6)     |
|            |         |        | 2013 | 1,778  | (1,433 to 2,113)     | 96.9   | (78.3 to 115.2)      |
|            |         | Female | 1990 | 2,976  | (2,674 to 3,735)     | 110    | (99.4 to 137.9)      |
|            |         |        | 2013 | 3,416  | (2,590 to 3,881)     | 82.6   | (63.5 to 93.2)       |
|            |         | Both   | 1990 | 4,791  | (4,366 to 5,659)     | 115.3  | (105.1 to 136.0)     |
|            |         |        | 2013 | 5,194  | (4,258 to 5,780)     | 89.6   | (73.9 to 99.4)       |
|            | DALYs   | Male   | 1990 | 33,059 | (28,114 to 40,329)   | 2094   | (1777.6 to 2551.3)   |
|            |         |        | 2013 | 29,777 | (24,251 to 35,287)   | 1642.7 | (1335.8 to 1950.7)   |
|            |         | Female | 1990 | 41,536 | (37,125 to 50,712)   | 1623.9 | (1445.1 to 1973.8)   |
|            |         |        | 2013 | 37,332 | (29,465 to 41,763)   | 1082.3 | (869.3 to 1224.9)    |
|            |         | Both   | 1990 | 74,596 | (68,206 to 86,334)   | 1823   | (1665.9 to 2113.6)   |
|            |         |        | 2013 | 67,110 | (57,035 to 74,450)   | 1323.4 | (1137.8 to 1475.5)   |
|            | YLDs    | Male   | 1990 | 538    | (347 to 772)         | 32     | (20.8 to 45.9)       |
|            |         |        | 2013 | 636    | (402 to 911)         | 36.3   | (23.2 to 51.5)       |
|            |         | Female | 1990 | 521    | (342 to 734)         | 21.6   | (14.2 to 30.5)       |
|            |         |        | 2013 | 595    | (394 to 873)         | 21.8   | (14.2 to 32.0)       |
|            |         | Both   | 1990 | 1,060  | (717 to 1,461)       | 26     | (17.7 to 35.8)       |
|            |         |        | 2013 | 1,231  | (854 to 1,695)       | 27.9   | (19.3 to 38.2)       |
| Luxembourg | Deaths  | Male   | 1990 | 219    | (182 to 262)         | 120.2  | (99.1 to 143.5)      |
|            |         |        | 2013 | 187    | (147 to 229)         | 54.1   | (42.5 to 66.2)       |
|            |         | Female | 1990 | 367    | (266 to 412)         | 110.4  | (80.2 to 123.6)      |
|            |         |        | 2013 | 260    | (195 to 405)         | 46.9   | (35.2 to 73.6)       |
|            |         | Both   | 1990 | 587    | (483 to 649)         | 114.9  | (94.7 to 127.0)      |
|            |         |        |      |        |                      |        | Uncertainty Interval |
| Country    | measure | sex    | year | number | Uncertainty Interval | Rate   | Interval             |
|            |         |        | 2013 | 447    | (369 to 597)         | 50.4   | (41.9 to 67.1)       |
|            | DALYs   | Male   | 1990 | 3,519  | (2,970 to 4,178)     | 1795   | (1514.6 to 2128.5)   |

|           |        |        |      |        |                    |        |                    |
|-----------|--------|--------|------|--------|--------------------|--------|--------------------|
|           |        |        | 2013 | 2,694  | (2,175 to 3,241)   | 793.2  | (640.9 to 953.5)   |
|           |        | Female | 1990 | 4,455  | (3,333 to 4,953)   | 1465.2 | (1086.0 to 1632.9) |
|           |        |        | 2013 | 2,670  | (2,061 to 4,038)   | 583.3  | (451.1 to 886.3)   |
|           |        | Both   | 1990 | 7,975  | (6,708 to 8,772)   | 1604.6 | (1353.7 to 1763.5) |
|           |        |        | 2013 | 5,364  | (4,543 to 6,789)   | 681.6  | (576.5 to 853.7)   |
|           | YLDs   | Male   | 1990 | 208    | (141 to 290)       | 103.2  | (70.1 to 143.6)    |
|           |        |        | 2013 | 366    | (248 to 513)       | 108.6  | (73.8 to 152.5)    |
|           |        | Female | 1990 | 208    | (135 to 297)       | 72.3   | (47.7 to 102.1)    |
|           |        |        | 2013 | 302    | (204 to 411)       | 74.1   | (50.0 to 100.2)    |
|           |        | Both   | 1990 | 417    | (286 to 570)       | 84.9   | (58.6 to 115.7)    |
|           |        |        | 2013 | 669    | (461 to 891)       | 89.9   | (62.1 to 119.8)    |
| Macedonia | Deaths | Male   | 1990 | 1,828  | (1,644 to 2,020)   | 288.9  | (260.0 to 317.6)   |
|           |        |        | 2013 | 2,500  | (2,148 to 2,839)   | 240.8  | (207.7 to 273.0)   |
|           |        | Female | 1990 | 1,759  | (1,604 to 1,987)   | 246    | (224.9 to 277.7)   |
|           |        |        | 2013 | 2,840  | (2,340 to 3,218)   | 206.7  | (170.0 to 233.8)   |
|           |        | Both   | 1990 | 3,587  | (3,358 to 3,855)   | 266.1  | (248.9 to 285.9)   |
|           |        |        | 2013 | 5,341  | (4,740 to 5,797)   | 221.8  | (196.6 to 240.3)   |
|           | DALYs  | Male   | 1990 | 31,104 | (27,796 to 34,776) | 4158   | (3717.2 to 4613.7) |
|           |        |        | 2013 | 37,679 | (32,174 to 42,664) | 3280.5 | (2813.9 to 3726.8) |
|           |        | Female | 1990 | 28,002 | (25,396 to 31,971) | 3412.8 | (3111.6 to 3883.1) |
|           |        |        | 2013 | 36,264 | (30,148 to 41,105) | 2592   | (2149.7 to 2938.1) |
|           |        | Both   | 1990 | 59,106 | (55,233 to 64,076) | 3765.2 | (3526.7 to 4048.9) |
|           |        |        | 2013 | 73,944 | (65,784 to 80,699) | 2903.1 | (2586.7 to 3165.1) |
|           | YLDs   | Male   | 1990 | 245    | (158 to 346)       | 28     | (18.1 to 39.5)     |
|           |        |        | 2013 | 392    | (254 to 565)       | 31.4   | (20.5 to 44.9)     |
|           |        | Female | 1990 | 172    | (111 to 242)       | 18.9   | (12.4 to 26.5)     |
|           |        |        | 2013 | 246    | (157 to 358)       | 18.1   | (11.6 to 26.0)     |
|           |        | Both   | 1990 | 418    | (279 to 566)       | 23.3   | (15.6 to 31.5)     |

|            |         |        | 2013 | 638     | (427 to 869)         | 24.4   | (16.4 to 33.2)       |
|------------|---------|--------|------|---------|----------------------|--------|----------------------|
| Madagascar | Deaths  | Male   | 1990 | 7,694   | (6,587 to 8,871)     | 374    | (323.7 to 426.8)     |
|            |         |        | 2013 | 13,350  | (10,486 to 18,134)   | 358.7  | (296.9 to 473.4)     |
|            |         | Female | 1990 | 6,496   | (5,329 to 7,525)     | 356.7  | (296.1 to 408.9)     |
|            |         |        | 2013 | 13,318  | (9,543 to 17,231)    | 355.9  | (263.2 to 448.9)     |
|            |         | Both   | 1990 | 14,190  | (12,522 to 15,802)   | 365.8  | (323.5 to 404.4)     |
|            |         |        | 2013 | 26,668  | (21,649 to 32,954)   | 357.9  | (297.8 to 432.0)     |
|            | DALYs   | Male   | 1990 | 203,274 | (170,864 to 237,195) | 7554.4 | (6444.9 to 8766.3)   |
|            |         |        | 2013 | 353,194 | (256,349 to 486,633) | 7007.9 | (5442.1 to 9609.5)   |
|            |         | Female | 1990 | 151,915 | (121,808 to 178,295) | 6385.8 | (5196.6 to 7410.7)   |
|            |         |        | 2013 | 293,260 | (202,255 to 395,435) | 6113.5 | (4329.8 to 7991.4)   |
|            |         | Both   | 1990 | 355,189 | (308,000 to 398,119) | 6969.7 | (6132.7 to 7786.2)   |
| Country    | measure | sex    | year | number  | Uncertainty Interval | Rate   | Uncertainty Interval |
|            |         |        | 2013 | 646,454 | (498,966 to 819,891) | 6559.5 | (5243.0 to 8169.3)   |
|            | YLDs    | Male   | 1990 | 384     | (244 to 557)         | 13.6   | (8.7 to 19.6)        |
|            |         |        | 2013 | 788     | (505 to 1,113)       | 14.6   | (9.5 to 20.9)        |
|            |         | Female | 1990 | 242     | (149 to 359)         | 9      | (5.6 to 13.2)        |
|            |         |        | 2013 | 552     | (359 to 801)         | 9.5    | (6.1 to 13.7)        |
|            |         | Both   | 1990 | 627     | (411 to 875)         | 11.3   | (7.5 to 15.8)        |
|            |         |        | 2013 | 1,340   | (900 to 1,835)       | 11.9   | (8.0 to 16.4)        |
| Malawi     | Deaths  | Male   | 1990 | 913     | (712 to 1,116)       | 75.8   | (57.7 to 93.6)       |
|            |         |        | 2013 | 2,407   | (1,843 to 3,108)     | 107.5  | (83.1 to 136.6)      |
|            |         | Female | 1990 | 1,671   | (1,241 to 2,028)     | 123.2  | (89.7 to 151.2)      |
|            |         |        | 2013 | 3,093   | (2,303 to 3,939)     | 122.2  | (91.0 to 155.5)      |
|            |         | Both   | 1990 | 2,584   | (2,040 to 2,988)     | 102    | (78.5 to 119.6)      |
|            |         |        | 2013 | 5,500   | (4,442 to 6,623)     | 115.9  | (93.3 to 138.9)      |
|            | DALYs   | Male   | 1990 | 25,443  | (19,704 to 31,631)   | 1330.7 | (1036.8 to 1619.5)   |
|            |         |        | 2013 | 52,856  | (39,902 to 68,728)   | 1781.4 | (1359.5 to 2316.7)   |

|          |         |        |      |         |                      |        |                      |
|----------|---------|--------|------|---------|----------------------|--------|----------------------|
|          |         | Female | 1990 | 38,869  | (29,452 to 47,832)   | 2042.8 | (1527.8 to 2465.1)   |
|          |         |        | 2013 | 58,474  | (43,528 to 75,785)   | 1819.7 | (1348.9 to 2343.1)   |
|          |         | Both   | 1990 | 64,312  | (52,264 to 74,653)   | 1721.8 | (1366.9 to 1992.2)   |
|          |         |        | 2013 | 111,331 | (90,476 to 134,501)  | 1807.8 | (1459.3 to 2182.1)   |
|          | YLDs    | Male   | 1990 | 259     | (165 to 383)         | 12.8   | (8.1 to 18.7)        |
|          |         |        | 2013 | 468     | (299 to 673)         | 12.8   | (7.9 to 18.7)        |
|          |         | Female | 1990 | 194     | (123 to 275)         | 8.7    | (5.5 to 12.6)        |
|          |         |        | 2013 | 357     | (224 to 519)         | 8.9    | (5.6 to 13.1)        |
|          |         | Both   | 1990 | 454     | (304 to 634)         | 10.6   | (7.1 to 14.7)        |
|          |         |        | 2013 | 825     | (555 to 1,143)       | 10.7   | (7.2 to 14.9)        |
| Malaysia | Deaths  | Male   | 1990 | 4,751   | (3,965 to 5,587)     | 138    | (112.2 to 164.9)     |
|          |         |        | 2013 | 8,550   | (6,946 to 10,922)    | 102.8  | (83.9 to 132.1)      |
|          |         | Female | 1990 | 4,942   | (3,739 to 5,538)     | 145.2  | (108.6 to 165.1)     |
|          |         |        | 2013 | 6,381   | (5,357 to 8,301)     | 86.8   | (72.2 to 114.2)      |
|          |         | Both   | 1990 | 9,693   | (8,070 to 10,785)    | 142    | (116.7 to 158.8)     |
|          |         |        | 2013 | 14,932  | (12,963 to 18,389)   | 94.4   | (81.5 to 116.7)      |
|          | DALYs   | Male   | 1990 | 114,278 | (94,102 to 133,279)  | 2520.8 | (2094.5 to 2952.6)   |
|          |         |        | 2013 | 191,927 | (155,584 to 243,052) | 1882.9 | (1533.4 to 2386.0)   |
|          |         | Female | 1990 | 103,868 | (80,937 to 114,958)  | 2394.9 | (1841.8 to 2661.5)   |
|          |         |        | 2013 | 127,449 | (106,085 to 165,228) | 1326.2 | (1116.1 to 1708.8)   |
|          |         | Both   | 1990 | 218,146 | (185,222 to 242,202) | 2460.8 | (2062.1 to 2736.1)   |
|          |         |        | 2013 | 319,376 | (277,623 to 390,623) | 1597   | (1394.9 to 1955.5)   |
|          | YLDs    | Male   | 1990 | 2,352   | (1,592 to 3,334)     | 57     | (38.2 to 81.0)       |
|          |         |        | 2013 | 6,366   | (4,257 to 8,780)     | 67.1   | (44.8 to 93.3)       |
|          |         | Female | 1990 | 2,086   | (1,420 to 2,853)     | 50.7   | (34.2 to 71.0)       |
|          |         |        | 2013 | 4,993   | (3,289 to 6,785)     | 51.3   | (34.4 to 69.4)       |
|          |         | Both   | 1990 | 4,438   | (3,091 to 5,965)     | 53.8   | (37.4 to 71.9)       |
| Country  | measure | sex    | year | number  | Uncertainty Interval | Rate   | Uncertainty Interval |

|          |        |        |      |        |                    |        |                    |
|----------|--------|--------|------|--------|--------------------|--------|--------------------|
|          |        |        | 2013 | 11,359 | (7,911 to 14,912)  | 59.2   | (41.9 to 77.4)     |
| Maldives | Deaths | Male   | 1990 | 97     | (64 to 113)        | 222.7  | (144.6 to 263.1)   |
|          |        |        | 2013 | 74     | (59 to 107)        | 80.8   | (63.1 to 118.4)    |
|          |        | Female | 1990 | 39     | (22 to 70)         | 145.4  | (94.9 to 233.8)    |
|          |        |        | 2013 | 58     | (35 to 71)         | 82.4   | (50.5 to 100.4)    |
|          |        | Both   | 1990 | 136    | (108 to 164)       | 192.7  | (151.3 to 225.9)   |
|          |        |        | 2013 | 133    | (106 to 157)       | 80.7   | (64.2 to 95.2)     |
|          | DALYs  | Male   | 1990 | 3,078  | (2,221 to 3,646)   | 4328.4 | (2874.0 to 5060.4) |
|          |        |        | 2013 | 1,502  | (1,227 to 1,967)   | 1324.9 | (1076.9 to 1815.7) |
|          |        | Female | 1990 | 1,168  | (582 to 2,456)     | 2628.6 | (1556.8 to 4511.5) |
|          |        |        | 2013 | 1,015  | (637 to 1,254)     | 1087.5 | (679.5 to 1341.5)  |
|          |        | Both   | 1990 | 4,246  | (3,408 to 5,392)   | 3613.5 | (2878.2 to 4330.4) |
|          |        |        | 2013 | 2,517  | (2,059 to 2,917)   | 1203.7 | (978.1 to 1408.1)  |
|          | YLDs   | Male   | 1990 | 28     | (18 to 39)         | 55.6   | (37.3 to 75.4)     |
|          |        |        | 2013 | 61     | (40 to 87)         | 59.9   | (39.1 to 86.4)     |
|          |        | Female | 1990 | 16     | (11 to 21)         | 47.4   | (32.4 to 63.7)     |
|          |        |        | 2013 | 43     | (29 to 59)         | 46.9   | (32.0 to 64.4)     |
|          |        | Both   | 1990 | 44     | (30 to 59)         | 52.1   | (36.4 to 69.4)     |
|          |        |        | 2013 | 104    | (73 to 141)        | 53.6   | (37.4 to 72.3)     |
| Mali     | Deaths | Male   | 1990 | 1,337  | (1,068 to 1,607)   | 91.7   | (72.1 to 110.9)    |
|          |        |        | 2013 | 2,401  | (1,841 to 3,078)   | 117.5  | (90.9 to 150.6)    |
|          |        | Female | 1990 | 2,714  | (1,915 to 3,215)   | 163.9  | (116.3 to 197.4)   |
|          |        |        | 2013 | 4,617  | (3,297 to 5,966)   | 191.6  | (137.2 to 247.3)   |
|          |        | Both   | 1990 | 4,051  | (3,179 to 4,639)   | 130.9  | (101.6 to 151.5)   |
|          |        |        | 2013 | 7,018  | (5,550 to 8,548)   | 157.9  | (125.9 to 191.8)   |
|          | DALYs  | Male   | 1990 | 37,546 | (29,988 to 45,243) | 1738.4 | (1390.4 to 2084.2) |
|          |        |        | 2013 | 66,336 | (49,512 to 85,150) | 2111.7 | (1615.0 to 2726.8) |
|          |        | Female | 1990 | 70,232 | (48,646 to 84,755) | 3115.1 | (2207.6 to 3710.8) |

|         |         |        | 2013 | 116,383 | (80,681 to 149,732)  | 3516   | (2463.4 to 4529.0)   |
|---------|---------|--------|------|---------|----------------------|--------|----------------------|
|         |         | Both   | 1990 | 107,778 | (83,817 to 124,815)  | 2478.4 | (1931.5 to 2852.5)   |
|         |         |        | 2013 | 182,720 | (141,892 to 221,174) | 2869.4 | (2265.7 to 3509.3)   |
|         | YLDs    | Male   | 1990 | 381     | (259 to 530)         | 20.2   | (13.5 to 28.0)       |
|         |         |        | 2013 | 559     | (369 to 802)         | 18.7   | (12.3 to 26.5)       |
|         |         | Female | 1990 | 319     | (217 to 449)         | 14.8   | (10.1 to 20.8)       |
|         |         |        | 2013 | 506     | (325 to 711)         | 15     | (9.7 to 21.0)        |
|         |         | Both   | 1990 | 701     | (491 to 935)         | 17.3   | (12.1 to 22.9)       |
|         |         |        | 2013 | 1,066   | (733 to 1,452)       | 16.7   | (11.3 to 22.8)       |
| Malta   | Deaths  | Male   | 1990 | 115     | (96 to 144)          | 86.5   | (71.9 to 107.7)      |
|         |         |        | 2013 | 129     | (101 to 159)         | 51     | (40.2 to 62.8)       |
|         |         | Female | 1990 | 159     | (125 to 184)         | 80.9   | (63.9 to 94.2)       |
|         |         |        | 2013 | 175     | (133 to 213)         | 49.1   | (37.4 to 59.8)       |
|         |         | Both   | 1990 | 275     | (241 to 312)         | 83.6   | (73.2 to 94.8)       |
| Country | measure | sex    | year | number  | Uncertainty Interval | Rate   | Uncertainty Interval |
|         |         |        | 2013 | 304     | (255 to 352)         | 50.5   | (42.0 to 58.4)       |
|         | DALYs   | Male   | 1990 | 1,945   | (1,647 to 2,367)     | 1318.8 | (1121.6 to 1605.5)   |
|         |         |        | 2013 | 2,113   | (1,697 to 2,566)     | 731.8  | (588.5 to 883.4)     |
|         |         | Female | 1990 | 2,146   | (1,736 to 2,443)     | 1095.3 | (885.9 to 1246.3)    |
|         |         |        | 2013 | 1,982   | (1,616 to 2,426)     | 557.3  | (457.3 to 681.8)     |
|         |         | Both   | 1990 | 4,091   | (3,641 to 4,594)     | 1194   | (1061.2 to 1341.4)   |
|         |         |        | 2013 | 4,096   | (3,493 to 4,727)     | 641.1  | (545.3 to 736.3)     |
|         | YLDs    | Male   | 1990 | 149     | (97 to 200)          | 99.5   | (65.1 to 133.7)      |
|         |         |        | 2013 | 324     | (203 to 467)         | 105.7  | (66.2 to 151.8)      |
|         |         | Female | 1990 | 142     | (99 to 198)          | 72.6   | (50.4 to 101.1)      |
|         |         |        | 2013 | 250     | (167 to 352)         | 70.8   | (47.5 to 99.8)       |
|         |         | Both   | 1990 | 292     | (201 to 387)         | 84.1   | (57.9 to 111.0)      |
|         |         |        | 2013 | 574     | (389 to 783)         | 86.8   | (58.5 to 118.0)      |

|                  |        |        |      |            |                    |                |                    |
|------------------|--------|--------|------|------------|--------------------|----------------|--------------------|
| Marshall Islands | Deaths | Male   | 1990 | 15         | (10 to 20)         | 219            | (141.1 to 274.2)   |
|                  |        |        | 2013 | 28         | (18 to 40)         | 209.5          | (139.4 to 277.7)   |
|                  |        | Female | 1990 | 7          | (5 to 10)          | 109.2          | (82.7 to 149.5)    |
|                  |        |        | 2013 | 19         | (10 to 27)         | 131.2          | (77.2 to 185.5)    |
|                  |        | Both   | 1990 | 23         | (18 to 28)         | 159.7          | (126.0 to 189.1)   |
|                  |        |        | 2013 | 48         | (32 to 63)         | 166.8          | (114.6 to 211.4)   |
|                  | DALYs  | Male   | 1990 | 472        | (328 to 610)       | 4457.8         | (2921.6 to 5690.5) |
|                  |        |        | 2013 | 821        | (530 to 1,200)     | 4279.1         | (2813.0 to 5960.0) |
|                  |        | Female | 1990 | 203        | (151 to 266)       | 2005.7         | (1496.3 to 2640.0) |
|                  |        |        | 2013 | 459        | (241 to 679)       | 2408.8         | (1333.6 to 3449.3) |
|                  |        | Both   | 1990 | 676        | (519 to 816)       | 3191           | (2459.8 to 3846.1) |
|                  |        |        | 2013 | 1,281      | (849 to 1,744)     | 3302.1         | (2228.9 to 4358.0) |
|                  | YLDs   | Male   | 1990 | 4          | (3 to 6)           | 61.4           | (41.8 to 86.1)     |
|                  |        |        | 2013 | 8          | (5 to 11)          | 53.8           | (35.8 to 73.5)     |
| Female           |        | 1990   | 3    | (2 to 4)   | 41.5               | (27.9 to 56.3) |                    |
|                  |        | 2013   | 6    | (4 to 9)   | 40.3               | (27.0 to 57.3) |                    |
| Both             |        | 1990   | 8    | (5 to 11)  | 50.6               | (35.4 to 68.0) |                    |
|                  |        | 2013   | 15   | (10 to 20) | 46.5               | (32.5 to 61.2) |                    |
| Mauritania       | Deaths | Male   | 1990 | 346        | (268 to 421)       | 119.6          | (92.9 to 145.5)    |
|                  |        |        | 2013 | 883        | (679 to 1,113)     | 153.6          | (122.1 to 187.3)   |
|                  |        | Female | 1990 | 515        | (412 to 662)       | 151.4          | (122.1 to 195.8)   |
|                  |        |        | 2013 | 1,157      | (832 to 1,591)     | 170.3          | (123.9 to 233.1)   |
|                  |        | Both   | 1990 | 862        | (742 to 1,026)     | 137.7          | (118.1 to 164.8)   |
|                  |        |        | 2013 | 2,040      | (1,664 to 2,534)   | 163.6          | (134.7 to 201.7)   |
|                  | DALYs  | Male   | 1990 | 8,891      | (6,872 to 10,893)  | 2149.1         | (1663.1 to 2613.0) |
|                  |        |        | 2013 | 21,695     | (16,112 to 28,493) | 2664.1         | (2050.6 to 3352.0) |
|                  |        | Female | 1990 | 11,622     | (9,067 to 14,824)  | 2584           | (2056.4 to 3315.5) |
|                  |        |        | 2013 | 24,091     | (17,041 to 34,095) | 2762.6         | (1989.9 to 3823.1) |

| Country   | measure | sex    | year | number | Uncertainty Interval | Rate   | Uncertainty Interval |
|-----------|---------|--------|------|--------|----------------------|--------|----------------------|
|           |         | Both   | 1990 | 20,513 | (17,460 to 24,165)   | 2395.3 | (2059.2 to 2843.2)   |
|           |         |        | 2013 | 45,787 | (36,173 to 57,207)   | 2731   | (2217.7 to 3389.8)   |
|           | YLDs    | Male   | 1990 | 85     | (56 to 119)          | 19.6   | (13.2 to 27.0)       |
|           |         |        | 2013 | 191    | (123 to 269)         | 20.5   | (13.3 to 29.0)       |
|           |         | Female | 1990 | 73     | (47 to 104)          | 14.7   | (9.5 to 20.9)        |
|           |         |        | 2013 | 154    | (101 to 217)         | 14.8   | (9.8 to 20.7)        |
|           |         | Both   | 1990 | 159    | (108 to 214)         | 16.9   | (11.7 to 22.7)       |
|           |         |        | 2013 | 345    | (229 to 478)         | 17.4   | (11.8 to 23.9)       |
| Mauritius | Deaths  | Male   | 1990 | 515    | (448 to 605)         | 251.7  | (218.1 to 293.1)     |
|           |         |        | 2013 | 733    | (579 to 844)         | 155.7  | (124.3 to 178.8)     |
|           |         | Female | 1990 | 439    | (365 to 504)         | 158    | (133.5 to 184.0)     |
|           |         |        | 2013 | 553    | (458 to 760)         | 89.6   | (74.1 to 121.5)      |
|           |         | Both   | 1990 | 954    | (866 to 1,072)       | 196.7  | (178.8 to 221.5)     |
|           |         |        | 2013 | 1,286  | (1,137 to 1,502)     | 118.4  | (104.7 to 138.5)     |
|           | DALYs   | Male   | 1990 | 12,221 | (10,613 to 14,475)   | 4558.1 | (3981.1 to 5334.6)   |
|           |         |        | 2013 | 15,370 | (12,213 to 17,875)   | 2700.2 | (2141.5 to 3122.0)   |
|           |         | Female | 1990 | 8,235  | (6,811 to 9,380)     | 2491.9 | (2059.1 to 2834.2)   |
|           |         |        | 2013 | 8,463  | (7,004 to 11,929)    | 1273.8 | (1057.8 to 1792.8)   |
|           |         | Both   | 1990 | 20,457 | (18,545 to 22,956)   | 3387.6 | (3084.4 to 3790.6)   |
|           |         |        | 2013 | 23,833 | (20,808 to 27,739)   | 1921.1 | (1686.7 to 2236.1)   |
|           | YLDs    | Male   | 1990 | 148    | (98 to 207)          | 57.4   | (37.6 to 79.6)       |
|           |         |        | 2013 | 340    | (235 to 473)         | 61.6   | (42.0 to 85.7)       |
|           |         | Female | 1990 | 151    | (102 to 209)         | 46     | (31.4 to 63.6)       |
|           |         |        | 2013 | 333    | (227 to 452)         | 49.4   | (33.6 to 67.2)       |
|           |         | Both   | 1990 | 300    | (209 to 406)         | 50.8   | (35.7 to 68.3)       |
|           |         |        | 2013 | 673    | (473 to 890)         | 54.8   | (38.7 to 72.1)       |
| Mexico    | Deaths  | Male   | 1990 | 10,399 | (8,779 to 12,005)    | 60.5   | (50.7 to 70.0)       |



|         |         |        |      |         |                      |        |                      |
|---------|---------|--------|------|---------|----------------------|--------|----------------------|
|         |         |        | 2013 | 19,386  | (16,443 to 23,716)   | 54.7   | (46.3 to 67.5)       |
|         |         | Female | 1990 | 12,210  | (9,763 to 14,472)    | 57.3   | (45.6 to 67.9)       |
|         |         |        | 2013 | 21,332  | (17,312 to 26,536)   | 45.7   | (37.0 to 56.9)       |
|         |         | Both   | 1990 | 22,609  | (19,911 to 25,260)   | 58.7   | (51.5 to 66.0)       |
|         |         |        | 2013 | 40,719  | (36,791 to 47,691)   | 49.8   | (44.9 to 58.3)       |
|         | DALYs   | Male   | 1990 | 231,431 | (198,098 to 267,910) | 1052.9 | (896.4 to 1219.8)    |
|         |         |        | 2013 | 374,777 | (319,833 to 455,876) | 914.5  | (783.1 to 1118.1)    |
|         |         | Female | 1990 | 240,799 | (194,061 to 285,285) | 949.9  | (764.6 to 1122.1)    |
|         |         |        | 2013 | 349,050 | (289,812 to 448,323) | 695.6  | (576.3 to 888.0)     |
|         |         | Both   | 1990 | 472,231 | (419,185 to 524,405) | 995.7  | (886.6 to 1107.7)    |
|         |         |        | 2013 | 723,827 | (655,880 to 848,261) | 794.8  | (721.5 to 931.4)     |
|         | YLDs    | Male   | 1990 | 5,584   | (3,940 to 7,314)     | 26.3   | (18.6 to 34.3)       |
|         |         |        | 2013 | 11,738  | (8,246 to 15,343)    | 28     | (19.9 to 36.5)       |
|         |         | Female | 1990 | 4,399   | (3,082 to 5,708)     | 18.1   | (12.7 to 23.4)       |
|         |         |        | 2013 | 9,322   | (6,497 to 12,174)    | 18.2   | (12.7 to 23.7)       |
|         |         | Both   | 1990 | 9,983   | (7,001 to 13,009)    | 21.9   | (15.4 to 28.3)       |
|         |         |        |      |         |                      |        | Uncertainty Interval |
| Country | measure | sex    | year | number  | Uncertainty Interval | Rate   | Interval             |
|         |         |        | 2013 | 21,060  | (14,827 to 27,480)   | 22.6   | (15.9 to 29.4)       |
| Moldova | Deaths  | Male   | 1990 | 2,544   | (2,186 to 2,959)     | 189.7  | (162.6 to 220.9)     |
|         |         |        | 2013 | 2,837   | (2,441 to 3,294)     | 184.3  | (157.5 to 213.7)     |
|         |         | Female | 1990 | 3,649   | (3,011 to 4,095)     | 170.4  | (140.4 to 190.2)     |
|         |         |        | 2013 | 3,217   | (2,690 to 3,719)     | 124.8  | (104.4 to 144.1)     |
|         |         | Both   | 1990 | 6,194   | (5,476 to 6,739)     | 178.5  | (156.0 to 194.1)     |
|         |         |        | 2013 | 6,054   | (5,466 to 6,666)     | 148.6  | (133.8 to 164.1)     |
|         | DALYs   | Male   | 1990 | 53,190  | (45,763 to 61,300)   | 3375.4 | (2920.3 to 3902.1)   |
|         |         |        | 2013 | 57,094  | (49,189 to 66,292)   | 3251.8 | (2807.0 to 3761.5)   |
|         |         | Female | 1990 | 64,736  | (54,382 to 73,623)   | 2813.5 | (2363.3 to 3213.7)   |
|         |         |        | 2013 | 48,639  | (40,983 to 57,550)   | 1910.1 | (1609.0 to 2267.7)   |

|            |        |        |      |         |                      |        |                    |
|------------|--------|--------|------|---------|----------------------|--------|--------------------|
|            |        | Both   | 1990 | 117,926 | (105,278 to 129,260) | 3047.1 | (2714.7 to 3335.4) |
|            |        |        | 2013 | 105,733 | (96,171 to 117,354)  | 2476.5 | (2252.7 to 2745.9) |
|            | YLDs   | Male   | 1990 | 722     | (473 to 1,023)       | 41.2   | (27.1 to 58.4)     |
|            |        |        | 2013 | 802     | (515 to 1,146)       | 43.4   | (28.0 to 61.3)     |
|            |        | Female | 1990 | 594     | (358 to 894)         | 25.4   | (15.4 to 38.1)     |
|            |        |        | 2013 | 636     | (405 to 904)         | 26.2   | (16.7 to 36.9)     |
|            |        | Both   | 1990 | 1,316   | (878 to 1,832)       | 32.2   | (21.4 to 44.9)     |
|            |        |        | 2013 | 1,439   | (955 to 1,975)       | 33.7   | (22.2 to 46.1)     |
| Mongolia   | Deaths | Male   | 1990 | 1,051   | (870 to 1,218)       | 247    | (206.8 to 286.1)   |
|            |        |        | 2013 | 1,819   | (1,506 to 2,221)     | 303    | (256.3 to 360.3)   |
|            |        | Female | 1990 | 1,117   | (962 to 1,354)       | 224.9  | (192.9 to 274.5)   |
|            |        |        | 2013 | 1,792   | (1,397 to 2,158)     | 245.7  | (191.4 to 290.6)   |
|            |        | Both   | 1990 | 2,168   | (1,936 to 2,458)     | 235.3  | (210.2 to 267.2)   |
|            |        |        | 2013 | 3,612   | (3,144 to 4,112)     | 272    | (233.3 to 306.3)   |
|            | DALYs  | Male   | 1990 | 26,924  | (22,228 to 31,321)   | 4877.1 | (4013.6 to 5639.3) |
|            |        |        | 2013 | 49,658  | (39,931 to 61,993)   | 6071   | (5045.0 to 7365.0) |
|            |        | Female | 1990 | 26,426  | (22,750 to 31,783)   | 4271.1 | (3671.1 to 5203.5) |
|            |        |        | 2013 | 42,925  | (33,264 to 53,021)   | 4522   | (3517.5 to 5464.3) |
|            |        | Both   | 1990 | 53,351  | (47,562 to 60,078)   | 4556.9 | (4063.6 to 5155.9) |
|            |        |        | 2013 | 92,583  | (79,737 to 107,258)  | 5228.8 | (4548.3 to 5942.8) |
|            | YLDs   | Male   | 1990 | 98      | (66 to 135)          | 17.5   | (12.0 to 24.0)     |
|            |        |        | 2013 | 141     | (87 to 199)          | 15.8   | (9.8 to 22.6)      |
|            |        | Female | 1990 | 75      | (49 to 106)          | 12.4   | (8.2 to 17.4)      |
|            |        |        | 2013 | 119     | (77 to 170)          | 12.3   | (7.9 to 17.9)      |
|            |        | Both   | 1990 | 174     | (119 to 231)         | 14.8   | (10.2 to 19.7)     |
|            |        |        | 2013 | 260     | (176 to 352)         | 13.9   | (9.4 to 19.0)      |
| Montenegro | Deaths | Male   | 1990 | 529     | (424 to 649)         | 247.8  | (199.1 to 301.6)   |
|            |        |        | 2013 | 752     | (622 to 886)         | 231.7  | (191.8 to 272.0)   |

|         |         | Female | 1990 | 767     | (620 to 941)         | 229.3  | (184.6 to 282.1)     |
|---------|---------|--------|------|---------|----------------------|--------|----------------------|
|         |         |        | 2013 | 1,028   | (853 to 1,176)       | 227.7  | (188.5 to 261.2)     |
|         |         | Both   | 1990 | 1,297   | (1,114 to 1,504)     | 238.5  | (205.4 to 276.7)     |
| Country | measure | sex    | year | number  | Uncertainty Interval | Rate   | Uncertainty Interval |
|         |         |        | 2013 | 1,780   | (1,563 to 1,984)     | 230.9  | (201.9 to 257.0)     |
|         | DALYs   | Male   | 1990 | 10,404  | (8,248 to 12,967)    | 4266.2 | (3403.8 to 5270.0)   |
|         |         |        | 2013 | 12,323  | (10,065 to 14,605)   | 3517.6 | (2890.7 to 4174.1)   |
|         |         | Female | 1990 | 10,834  | (8,274 to 13,476)    | 3423.5 | (2614.5 to 4266.3)   |
|         |         |        | 2013 | 13,432  | (11,184 to 15,563)   | 3007.3 | (2522.5 to 3493.3)   |
|         |         | Both   | 1990 | 21,238  | (17,899 to 24,531)   | 3812.8 | (3217.1 to 4415.9)   |
|         |         |        | 2013 | 25,756  | (22,431 to 29,159)   | 3253.1 | (2844.6 to 3671.9)   |
|         | YLDs    | Male   | 1990 | 75      | (51 to 106)          | 29.2   | (19.6 to 41.2)       |
|         |         |        | 2013 | 113     | (72 to 160)          | 30.9   | (19.8 to 43.5)       |
|         |         | Female | 1990 | 60      | (39 to 83)           | 19     | (12.5 to 26.4)       |
|         |         |        | 2013 | 80      | (51 to 113)          | 18.8   | (12.1 to 26.3)       |
|         |         | Both   | 1990 | 135     | (93 to 180)          | 23.5   | (16.3 to 31.3)       |
|         |         |        | 2013 | 193     | (131 to 266)         | 24.4   | (16.7 to 33.3)       |
| Morocco | Deaths  | Male   | 1990 | 4,195   | (3,418 to 5,130)     | 106.4  | (86.5 to 129.6)      |
|         |         |        | 2013 | 5,574   | (4,359 to 7,429)     | 71.5   | (55.8 to 92.9)       |
|         |         | Female | 1990 | 5,310   | (4,270 to 6,170)     | 112.5  | (88.1 to 131.5)      |
|         |         |        | 2013 | 7,988   | (6,126 to 10,658)    | 79.8   | (60.6 to 106.6)      |
|         |         | Both   | 1990 | 9,506   | (8,228 to 10,725)    | 110.2  | (92.8 to 124.2)      |
|         |         |        | 2013 | 13,563  | (11,340 to 16,747)   | 76.4   | (63.9 to 94.0)       |
|         | DALYs   | Male   | 1990 | 123,550 | (98,622 to 154,666)  | 1905.7 | (1556.9 to 2339.9)   |
|         |         |        | 2013 | 126,103 | (97,267 to 170,035)  | 1204.7 | (939.6 to 1612.0)    |
|         |         | Female | 1990 | 131,741 | (105,954 to 162,773) | 1882.5 | (1527.7 to 2188.7)   |
|         |         |        | 2013 | 151,748 | (115,384 to 203,480) | 1271.7 | (968.0 to 1710.9)    |
|         |         | Both   | 1990 | 255,291 | (220,434 to 298,168) | 1897.4 | (1642.8 to 2141.2)   |

|            |         |        |      |         |                      |        |                      |
|------------|---------|--------|------|---------|----------------------|--------|----------------------|
|            |         |        | 2013 | 277,851 | (228,842 to 343,127) | 1244   | (1039.6 to 1534.7)   |
|            | YLDs    | Male   | 1990 | 591     | (373 to 837)         | 10.3   | (6.4 to 14.7)        |
|            |         |        | 2013 | 1,222   | (783 to 1,744)       | 10.8   | (7.0 to 15.4)        |
|            |         | Female | 1990 | 597     | (387 to 840)         | 9      | (5.9 to 12.5)        |
|            |         |        | 2013 | 1,194   | (747 to 1,667)       | 9.4    | (5.9 to 13.0)        |
|            |         | Both   | 1990 | 1,189   | (791 to 1,621)       | 9.6    | (6.4 to 13.2)        |
|            |         |        | 2013 | 2,417   | (1,621 to 3,259)     | 10     | (6.7 to 13.4)        |
| Mozambique | Deaths  | Male   | 1990 | 1,930   | (1,424 to 2,403)     | 90.8   | (66.7 to 113.3)      |
|            |         |        | 2013 | 5,112   | (3,883 to 6,614)     | 130.6  | (100.7 to 168.6)     |
|            |         | Female | 1990 | 2,328   | (1,679 to 2,959)     | 92.6   | (65.3 to 118.8)      |
|            |         |        | 2013 | 4,899   | (3,573 to 6,275)     | 105.4  | (76.0 to 134.9)      |
|            |         | Both   | 1990 | 4,258   | (3,407 to 5,066)     | 92.6   | (72.8 to 111.7)      |
|            |         |        | 2013 | 10,011  | (8,100 to 12,099)    | 117    | (93.7 to 142.1)      |
|            | DALYs   | Male   | 1990 | 50,061  | (36,848 to 62,652)   | 1803.4 | (1333.8 to 2249.3)   |
|            |         |        | 2013 | 120,353 | (91,639 to 156,383)  | 2495.8 | (1907.3 to 3226.1)   |
|            |         | Female | 1990 | 50,271  | (36,043 to 63,993)   | 1554.1 | (1125.9 to 1973.3)   |
|            |         |        | 2013 | 91,954  | (68,019 to 117,463)  | 1634.8 | (1199.3 to 2096.2)   |
|            |         | Both   | 1990 | 100,332 | (79,478 to 119,164)  | 1670.8 | (1331.3 to 1990.6)   |
|            |         |        |      |         |                      |        | Uncertainty Interval |
| Country    | measure | sex    | year | number  | Uncertainty Interval | Rate   | Uncertainty Interval |
|            |         |        | 2013 | 212,308 | (174,432 to 257,217) | 2023.2 | (1648.1 to 2448.1)   |
|            | YLDs    | Male   | 1990 | 388     | (259 to 544)         | 12.9   | (8.5 to 17.8)        |
|            |         |        | 2013 | 785     | (488 to 1,164)       | 13.7   | (8.6 to 20.2)        |
|            |         | Female | 1990 | 337     | (213 to 486)         | 9.1    | (5.7 to 13.1)        |
|            |         |        | 2013 | 661     | (407 to 955)         | 9.6    | (6.0 to 13.9)        |
|            |         | Both   | 1990 | 725     | (489 to 992)         | 10.7   | (7.2 to 14.8)        |
|            |         |        | 2013 | 1,446   | (951 to 2,042)       | 11.4   | (7.6 to 15.9)        |
| Myanmar    | Deaths  | Male   | 1990 | 19,818  | (12,959 to 28,520)   | 248.9  | (172.4 to 342.4)     |
|            |         |        | 2013 | 27,881  | (17,852 to 39,638)   | 213.5  | (146.5 to 285.9)     |

|         |        |        |      |           |                        |        |                    |
|---------|--------|--------|------|-----------|------------------------|--------|--------------------|
|         |        | Female | 1990 | 21,659    | (13,316 to 33,203)     | 232    | (150.6 to 342.6)   |
|         |        |        | 2013 | 28,585    | (17,956 to 41,501)     | 182.3  | (120.3 to 255.5)   |
|         |        | Both   | 1990 | 41,478    | (27,235 to 59,616)     | 241    | (166.5 to 334.8)   |
|         |        |        | 2013 | 56,467    | (36,157 to 78,944)     | 196.8  | (134.8 to 264.1)   |
|         | DALYs  | Male   | 1990 | 491,968   | (314,423 to 720,548)   | 4698.9 | (3045.2 to 6779.1) |
|         |        |        | 2013 | 632,649   | (375,906 to 962,469)   | 3756.5 | (2375.5 to 5368.9) |
|         |        | Female | 1990 | 425,349   | (245,042 to 697,593)   | 3799.4 | (2283.3 to 5967.7) |
|         |        |        | 2013 | 512,382   | (306,053 to 790,897)   | 2734.2 | (1701.5 to 4058.0) |
|         |        | Both   | 1990 | 917,318   | (581,331 to 1,368,588) | 4237.3 | (2759.7 to 6205.8) |
|         |        |        | 2013 | 1,145,032 | (691,108 to 1,699,167) | 3207.3 | (2015.9 to 4572.0) |
|         | YLDs   | Male   | 1990 | 5,223     | (3,368 to 7,213)       | 54.4   | (35.0 to 75.8)     |
|         |        |        | 2013 | 9,667     | (6,346 to 13,524)      | 60.4   | (40.7 to 85.0)     |
|         |        | Female | 1990 | 4,924     | (3,251 to 6,903)       | 42.9   | (28.9 to 60.7)     |
|         |        |        | 2013 | 8,866     | (6,111 to 12,188)      | 45.4   | (31.0 to 62.1)     |
|         |        | Both   | 1990 | 10,147    | (7,079 to 13,522)      | 48     | (33.7 to 64.3)     |
|         |        |        | 2013 | 18,534    | (13,073 to 24,639)     | 52     | (36.9 to 68.6)     |
| Namibia | Deaths | Male   | 1990 | 321       | (256 to 394)           | 154.8  | (122.9 to 190.5)   |
|         |        |        | 2013 | 597       | (478 to 743)           | 161.6  | (130.2 to 196.5)   |
|         |        | Female | 1990 | 436       | (346 to 517)           | 166.6  | (133.2 to 197.9)   |
|         |        |        | 2013 | 734       | (590 to 954)           | 154    | (125.1 to 199.0)   |
|         |        | Both   | 1990 | 758       | (635 to 865)           | 162.5  | (136.4 to 185.1)   |
|         |        |        | 2013 | 1,332     | (1,127 to 1,588)       | 158.1  | (134.1 to 187.8)   |
|         | DALYs  | Male   | 1990 | 7,532     | (5,945 to 9,293)       | 2786.3 | (2218.6 to 3425.3) |
|         |        |        | 2013 | 14,527    | (11,156 to 18,355)     | 2995.5 | (2379.6 to 3741.6) |
|         |        | Female | 1990 | 8,750     | (6,735 to 10,538)      | 2757.2 | (2167.0 to 3287.1) |
|         |        |        | 2013 | 14,373    | (11,174 to 19,222)     | 2455.3 | (1947.2 to 3217.3) |
|         |        | Both   | 1990 | 16,283    | (13,473 to 18,942)     | 2781.7 | (2327.8 to 3189.0) |
|         |        |        | 2013 | 28,900    | (24,010 to 34,880)     | 2700   | (2274.9 to 3236.3) |

|             | YLDs    | Male   | 1990 | 74      | (48 to 103)          | 24.5   | (15.9 to 34.5)       |
|-------------|---------|--------|------|---------|----------------------|--------|----------------------|
|             |         |        | 2013 | 130     | (84 to 183)          | 24.1   | (15.8 to 34.0)       |
|             |         | Female | 1990 | 79      | (51 to 110)          | 22.2   | (14.4 to 31.4)       |
|             |         |        | 2013 | 146     | (97 to 212)          | 21.4   | (14.0 to 31.2)       |
|             |         | Both   | 1990 | 153     | (105 to 207)         | 23.3   | (16.0 to 31.6)       |
| Country     | measure | sex    | year | number  | Uncertainty Interval | Rate   | Uncertainty Interval |
|             |         |        | 2013 | 276     | (189 to 378)         | 22.5   | (15.2 to 30.9)       |
| Nepal       | Deaths  | Male   | 1990 | 3,163   | (2,295 to 4,126)     | 104.5  | (76.2 to 134.8)      |
|             |         |        | 2013 | 7,774   | (5,745 to 10,025)    | 127.2  | (93.6 to 162.5)      |
|             |         | Female | 1990 | 2,938   | (2,006 to 4,713)     | 89.7   | (60.1 to 140.4)      |
|             |         |        | 2013 | 8,322   | (5,494 to 11,025)    | 125    | (83.0 to 163.0)      |
|             |         | Both   | 1990 | 6,101   | (4,900 to 7,826)     | 96.6   | (77.2 to 121.6)      |
|             |         |        | 2013 | 16,097  | (12,249 to 19,583)   | 126    | (96.8 to 152.5)      |
|             | DALYs   | Male   | 1990 | 79,305  | (58,283 to 104,099)  | 1857.4 | (1356.4 to 2420.1)   |
|             |         |        | 2013 | 158,217 | (116,624 to 205,185) | 2030.4 | (1507.0 to 2600.6)   |
|             |         | Female | 1990 | 66,029  | (45,670 to 107,800)  | 1513.7 | (1052.6 to 2425.8)   |
|             |         |        | 2013 | 152,903 | (98,498 to 206,526)  | 1890.6 | (1252.2 to 2524.5)   |
|             |         | Both   | 1990 | 145,335 | (117,284 to 188,869) | 1678.4 | (1355.9 to 2155.7)   |
|             |         |        | 2013 | 311,121 | (237,131 to 383,394) | 1956   | (1489.3 to 2387.3)   |
|             | YLDs    | Male   | 1990 | 1,911   | (1,259 to 2,733)     | 41.6   | (26.7 to 59.9)       |
|             |         |        | 2013 | 3,841   | (2,549 to 5,376)     | 43.2   | (28.7 to 60.1)       |
|             |         | Female | 1990 | 1,742   | (1,116 to 2,416)     | 35.3   | (22.5 to 48.8)       |
|             |         |        | 2013 | 3,272   | (2,164 to 4,555)     | 34.5   | (22.8 to 47.9)       |
|             |         | Both   | 1990 | 3,653   | (2,441 to 5,037)     | 38.3   | (25.6 to 52.6)       |
|             |         |        | 2013 | 7,113   | (4,993 to 9,526)     | 38.7   | (26.8 to 51.4)       |
| Netherlands | Deaths  | Male   | 1990 | 5,167   | (4,286 to 6,269)     | 74.1   | (61.1 to 90.1)       |
|             |         |        | 2013 | 4,546   | (3,522 to 5,582)     | 38.4   | (29.7 to 47.1)       |
|             |         | Female | 1990 | 7,542   | (5,888 to 8,571)     | 61.2   | (47.9 to 69.7)       |

|             |         |        | 2013 | 7,337   | (5,898 to 10,206)    | 40.1   | (32.5 to 55.2)       |
|-------------|---------|--------|------|---------|----------------------|--------|----------------------|
|             |         | Both   | 1990 | 12,709  | (10,984 to 14,357)   | 66.7   | (57.7 to 75.4)       |
|             |         |        | 2013 | 11,884  | (9,822 to 14,487)    | 39.8   | (33.0 to 48.2)       |
|             | DALYs   | Male   | 1990 | 83,402  | (70,753 to 100,459)  | 1120.2 | (949.1 to 1342.9)    |
|             |         |        | 2013 | 66,800  | (53,565 to 79,748)   | 557.3  | (447.2 to 666.8)     |
|             |         | Female | 1990 | 90,201  | (72,528 to 103,044)  | 824.9  | (668.6 to 958.3)     |
|             |         |        | 2013 | 79,081  | (65,660 to 104,815)  | 514.3  | (423.6 to 680.9)     |
|             |         | Both   | 1990 | 173,604 | (154,230 to 196,034) | 949.1  | (846.3 to 1073.4)    |
|             |         |        | 2013 | 145,882 | (124,352 to 171,203) | 535    | (455.3 to 623.7)     |
|             | YLDs    | Male   | 1990 | 6,004   | (4,068 to 8,272)     | 79     | (53.3 to 108.5)      |
|             |         |        | 2013 | 8,790   | (5,631 to 12,463)    | 72.7   | (46.9 to 102.4)      |
|             |         | Female | 1990 | 6,387   | (4,295 to 9,103)     | 61.1   | (41.2 to 86.2)       |
|             |         |        | 2013 | 8,105   | (5,474 to 11,035)    | 56.3   | (38.1 to 76.2)       |
|             |         | Both   | 1990 | 12,391  | (8,393 to 16,869)    | 68.6   | (46.5 to 93.2)       |
|             |         |        | 2013 | 16,895  | (11,273 to 22,788)   | 63.9   | (42.8 to 86.2)       |
| New Zealand | Deaths  | Male   | 1990 | 1,067   | (894 to 1,306)       | 76.4   | (63.6 to 93.3)       |
|             |         |        | 2013 | 1,131   | (868 to 1,415)       | 38.5   | (29.5 to 48.0)       |
|             |         | Female | 1990 | 1,609   | (1,320 to 1,972)     | 74.1   | (61.0 to 90.8)       |
|             |         |        | 2013 | 1,768   | (1,306 to 2,133)     | 44.5   | (33.2 to 53.2)       |
|             |         | Both   | 1990 | 2,677   | (2,395 to 3,104)     | 75.7   | (67.4 to 87.9)       |
|             |         |        |      |         |                      |        | Uncertainty Interval |
|             |         |        | 2013 | 2,900   | (2,336 to 3,349)     | 42.1   | (34.2 to 48.5)       |
|             | DALYs   | Male   | 1990 | 17,892  | (15,229 to 21,603)   | 1170.7 | (995.9 to 1414.2)    |
|             |         |        | 2013 | 15,050  | (11,930 to 18,303)   | 533.4  | (422.7 to 647.6)     |
|             |         | Female | 1990 | 20,636  | (17,414 to 24,817)   | 1016.5 | (860.4 to 1220.9)    |
|             |         |        | 2013 | 17,682  | (13,629 to 20,807)   | 513.5  | (396.4 to 604.4)     |
|             |         | Both   | 1990 | 38,528  | (34,944 to 44,194)   | 1085.7 | (983.7 to 1244.6)    |
|             |         |        | 2013 | 32,733  | (27,590 to 37,014)   | 524.7  | (442.3 to 593.3)     |
| Country     | measure | sex    | year | number  | Uncertainty Interval | Rate   | Uncertainty Interval |

|           |        |        |      |        |                    |        |                    |
|-----------|--------|--------|------|--------|--------------------|--------|--------------------|
|           | YLDs   | Male   | 1990 | 1,252  | (872 to 1,670)     | 80.3   | (56.2 to 106.8)    |
|           |        |        | 2013 | 1,645  | (1,103 to 2,298)   | 59.3   | (39.9 to 82.6)     |
|           |        | Female | 1990 | 1,087  | (756 to 1,433)     | 54.6   | (38.1 to 71.9)     |
|           |        |        | 2013 | 1,255  | (838 to 1,730)     | 40.1   | (27.0 to 55.2)     |
|           |        | Both   | 1990 | 2,340  | (1,653 to 3,052)   | 66.1   | (46.8 to 86.2)     |
|           |        |        | 2013 | 2,901  | (1,981 to 3,919)   | 49.1   | (33.5 to 66.1)     |
| Nicaragua | Deaths | Male   | 1990 | 542    | (448 to 634)       | 96.9   | (78.9 to 113.6)    |
|           |        |        | 2013 | 1,011  | (822 to 1,233)     | 72.8   | (59.2 to 89.1)     |
|           |        | Female | 1990 | 687    | (504 to 772)       | 98.7   | (72.5 to 111.1)    |
|           |        |        | 2013 | 1,038  | (880 to 1,328)     | 61     | (51.7 to 78.0)     |
|           |        | Both   | 1990 | 1,230  | (1,024 to 1,354)   | 98.1   | (80.7 to 108.3)    |
|           |        |        | 2013 | 2,049  | (1,811 to 2,402)   | 66.5   | (58.9 to 78.2)     |
|           | DALYs  | Male   | 1990 | 12,775 | (10,733 to 15,090) | 1571.2 | (1302.8 to 1839.7) |
|           |        |        | 2013 | 17,760 | (14,530 to 21,164) | 1103.9 | (908.7 to 1317.1)  |
|           |        | Female | 1990 | 14,452 | (10,493 to 16,216) | 1558.5 | (1137.0 to 1741.4) |
|           |        |        | 2013 | 15,500 | (13,037 to 19,894) | 841.1  | (709.7 to 1082.0)  |
|           |        | Both   | 1990 | 27,228 | (22,617 to 30,055) | 1563.3 | (1306.5 to 1723.4) |
|           |        |        | 2013 | 33,260 | (29,398 to 38,682) | 964.5  | (852.9 to 1124.5)  |
|           | YLDs   | Male   | 1990 | 161    | (112 to 219)       | 18.4   | (13.0 to 25.2)     |
|           |        |        | 2013 | 429    | (292 to 595)       | 24.6   | (16.7 to 34.3)     |
|           |        | Female | 1990 | 153    | (101 to 211)       | 16.3   | (10.8 to 22.4)     |
|           |        |        | 2013 | 353    | (239 to 498)       | 18.3   | (12.1 to 26.0)     |
|           |        | Both   | 1990 | 314    | (219 to 413)       | 17.3   | (12.3 to 22.8)     |
|           |        |        | 2013 | 782    | (550 to 1,054)     | 21.3   | (15.0 to 28.7)     |
| Niger     | Deaths | Male   | 1990 | 1,059  | (827 to 1,326)     | 98.9   | (75.3 to 122.9)    |
|           |        |        | 2013 | 1,845  | (1,282 to 2,530)   | 79.8   | (56.2 to 109.2)    |
|           |        | Female | 1990 | 1,319  | (973 to 1,743)     | 114    | (84.6 to 148.4)    |
|           |        |        | 2013 | 2,584  | (1,216 to 3,742)   | 111    | (55.1 to 159.2)    |



|         |         |        |      |           |                          |        |                      |
|---------|---------|--------|------|-----------|--------------------------|--------|----------------------|
|         |         | Both   | 1990 | 2,379     | (1,926 to 2,814)         | 107.5  | (87.3 to 127.9)      |
|         |         |        | 2013 | 4,430     | (2,874 to 5,792)         | 96.4   | (62.8 to 125.2)      |
|         | DALYs   | Male   | 1990 | 37,070    | (28,619 to 48,990)       | 1915.2 | (1488.8 to 2371.8)   |
|         |         |        | 2013 | 48,064    | (33,702 to 68,246)       | 1369.8 | (958.8 to 1877.3)    |
|         |         | Female | 1990 | 41,712    | (29,756 to 56,625)       | 2076.3 | (1537.8 to 2704.3)   |
|         |         |        | 2013 | 60,364    | (27,619 to 88,865)       | 1815.5 | (851.9 to 2614.4)    |
|         |         | Both   | 1990 | 78,783    | (62,757 to 97,472)       | 2005.9 | (1627.6 to 2387.3)   |
|         |         |        |      |           |                          |        | Uncertainty Interval |
| Country | measure | sex    | year | number    | Uncertainty Interval     | Rate   | Interval             |
|         |         |        | 2013 | 108,429   | (68,680 to 143,681)      | 1599.5 | (1042.8 to 2093.2)   |
|         | YLDs    | Male   | 1990 | 308       | (200 to 437)             | 19.6   | (12.9 to 28.1)       |
|         |         |        | 2013 | 740       | (469 to 1,039)           | 19.1   | (12.3 to 26.8)       |
|         |         | Female | 1990 | 251       | (164 to 355)             | 14.4   | (9.5 to 20.0)        |
|         |         |        | 2013 | 547       | (359 to 754)             | 14.5   | (9.7 to 20.3)        |
|         |         | Both   | 1990 | 560       | (377 to 766)             | 16.8   | (11.4 to 23.0)       |
|         |         |        | 2013 | 1,287     | (854 to 1,727)           | 16.8   | (11.1 to 22.4)       |
| Nigeria | Deaths  | Male   | 1990 | 13,319    | (10,594 to 16,401)       | 105.8  | (83.8 to 126.8)      |
|         |         |        | 2013 | 25,266    | (19,537 to 32,558)       | 119.8  | (95.1 to 148.5)      |
|         |         | Female | 1990 | 18,758    | (15,417 to 23,048)       | 134    | (107.9 to 162.8)     |
|         |         |        | 2013 | 30,149    | (23,757 to 39,336)       | 139.4  | (109.9 to 176.4)     |
|         |         | Both   | 1990 | 32,077    | (27,593 to 36,926)       | 121.5  | (103.2 to 140.6)     |
|         |         |        | 2013 | 55,415    | (46,776 to 66,946)       | 130.3  | (111.1 to 153.8)     |
|         | DALYs   | Male   | 1990 | 365,687   | (287,127 to 450,793)     | 1753.8 | (1387.4 to 2137.6)   |
|         |         |        | 2013 | 629,801   | (469,305 to 823,916)     | 1892.9 | (1480.3 to 2427.4)   |
|         |         | Female | 1990 | 455,988   | (368,854 to 603,526)     | 2152.1 | (1772.4 to 2647.9)   |
|         |         |        | 2013 | 686,540   | (532,025 to 946,477)     | 2090.7 | (1653.3 to 2713.6)   |
|         |         | Both   | 1990 | 821,675   | (706,415 to 973,879)     | 1971.3 | (1681.4 to 2271.6)   |
|         |         |        | 2013 | 1,316,341 | (1,086,684 to 1,637,082) | 1998.2 | (1691.3 to 2402.7)   |

|             |         |        |      |         |                        |        |                      |
|-------------|---------|--------|------|---------|------------------------|--------|----------------------|
|             | YLDs    | Male   | 1990 | 4,258   | (2,790 to 6,128)       | 19.5   | (12.6 to 27.6)       |
|             |         |        | 2013 | 7,429   | (4,572 to 10,870)      | 18.5   | (11.3 to 27.8)       |
|             |         | Female | 1990 | 3,339   | (2,192 to 4,569)       | 14.3   | (9.5 to 19.8)        |
|             |         |        | 2013 | 5,890   | (3,879 to 8,463)       | 14.6   | (9.6 to 21.1)        |
|             |         | Both   | 1990 | 7,598   | (5,269 to 10,153)      | 16.8   | (11.8 to 22.2)       |
|             |         |        | 2013 | 13,319  | (8,634 to 18,750)      | 16.5   | (10.8 to 23.5)       |
| North Korea | Deaths  | Male   | 1990 | 7,969   | (5,320 to 11,355)      | 241.2  | (175.6 to 320.0)     |
|             |         |        | 2013 | 19,242  | (14,582 to 23,756)     | 258.5  | (202.5 to 313.3)     |
|             |         | Female | 1990 | 12,935  | (9,104 to 18,023)      | 210.7  | (152.3 to 283.8)     |
|             |         |        | 2013 | 25,833  | (19,976 to 31,867)     | 196.1  | (152.7 to 241.9)     |
|             |         | Both   | 1990 | 20,904  | (15,997 to 26,795)     | 221.3  | (173.0 to 275.9)     |
|             |         |        | 2013 | 45,075  | (38,317 to 53,206)     | 219.9  | (187.6 to 259.0)     |
|             | DALYs   | Male   | 1990 | 227,930 | (150,317 to 336,162)   | 4413.6 | (3045.5 to 6135.4)   |
|             |         |        | 2013 | 466,318 | (349,147 to 591,456)   | 4676.5 | (3609.8 to 5772.2)   |
|             |         | Female | 1990 | 271,032 | (178,684 to 388,092)   | 3591.6 | (2471.7 to 5047.9)   |
|             |         |        | 2013 | 446,528 | (340,151 to 560,238)   | 3154.2 | (2405.8 to 3952.2)   |
|             |         | Both   | 1990 | 498,963 | (375,186 to 656,316)   | 3916.7 | (3010.1 to 5026.5)   |
|             |         |        | 2013 | 912,846 | (762,536 to 1,088,037) | 3797.8 | (3211.0 to 4510.3)   |
|             | YLDs    | Male   | 1990 | 3,020   | (1,963 to 4,282)       | 73.3   | (47.5 to 106.4)      |
|             |         |        | 2013 | 6,760   | (4,532 to 9,411)       | 76.7   | (51.0 to 106.7)      |
|             |         | Female | 1990 | 3,305   | (2,243 to 4,529)       | 45.3   | (31.0 to 61.3)       |
|             |         |        | 2013 | 6,430   | (4,307 to 8,750)       | 45.6   | (30.8 to 61.7)       |
|             |         | Both   | 1990 | 6,325   | (4,322 to 8,656)       | 53.9   | (36.9 to 73.3)       |
|             |         |        |      |         |                        |        | Uncertainty Interval |
| Country     | measure | sex    | year | number  | Uncertainty Interval   | Rate   | Interval             |
|             |         |        | 2013 | 13,190  | (9,052 to 17,785)      | 56.2   | (38.8 to 75.7)       |
| Norway      | Deaths  | Male   | 1990 | 2,225   | (1,838 to 2,783)       | 85.6   | (70.7 to 106.7)      |
|             |         |        | 2013 | 1,733   | (1,282 to 2,097)       | 49.5   | (36.7 to 59.6)       |
|             |         | Female | 1990 | 3,227   | (2,515 to 3,671)       | 75.1   | (59.2 to 85.6)       |

|      |        |        |      |        |                    |        |                    |
|------|--------|--------|------|--------|--------------------|--------|--------------------|
|      |        |        | 2013 | 2,286  | (1,871 to 3,190)   | 40.7   | (33.8 to 57.4)     |
|      |        | Both   | 1990 | 5,452  | (4,768 to 6,112)   | 80.1   | (70.1 to 89.4)     |
|      |        |        | 2013 | 4,019  | (3,449 to 4,993)   | 44.8   | (38.5 to 55.2)     |
|      | DALYs  | Male   | 1990 | 33,432 | (28,117 to 42,034) | 1283.5 | (1080.3 to 1615.5) |
|      |        |        | 2013 | 23,430 | (17,539 to 27,732) | 687.3  | (514.2 to 813.5)   |
|      |        | Female | 1990 | 36,568 | (29,240 to 41,466) | 977.7  | (781.9 to 1126.1)  |
|      |        |        | 2013 | 21,540 | (18,027 to 29,672) | 470.3  | (395.2 to 646.6)   |
|      |        | Both   | 1990 | 70,000 | (62,562 to 78,721) | 1114.8 | (999.7 to 1261.1)  |
|      |        |        | 2013 | 44,971 | (38,690 to 53,506) | 571.1  | (491.7 to 678.2)   |
|      | YLDs   | Male   | 1990 | 2,521  | (1,679 to 3,478)   | 97.2   | (65.3 to 134.0)    |
|      |        |        | 2013 | 3,168  | (2,066 to 4,434)   | 93.8   | (61.0 to 131.4)    |
|      |        | Female | 1990 | 2,600  | (1,717 to 3,698)   | 74.1   | (49.2 to 104.7)    |
|      |        |        | 2013 | 2,698  | (1,771 to 3,805)   | 68.1   | (45.4 to 94.7)     |
|      |        | Both   | 1990 | 5,121  | (3,557 to 6,871)   | 84.2   | (58.4 to 112.1)    |
|      |        |        | 2013 | 5,866  | (3,957 to 8,021)   | 80.2   | (53.9 to 109.3)    |
| Oman | Deaths | Male   | 1990 | 221    | (151 to 308)       | 103    | (73.9 to 138.8)    |
|      |        |        | 2013 | 529    | (385 to 668)       | 96.2   | (71.8 to 118.7)    |
|      |        | Female | 1990 | 283    | (202 to 411)       | 104.9  | (75.8 to 149.6)    |
|      |        |        | 2013 | 414    | (288 to 528)       | 86     | (60.4 to 108.5)    |
|      |        | Both   | 1990 | 504    | (392 to 666)       | 103.2  | (81.5 to 132.0)    |
|      |        |        | 2013 | 943    | (756 to 1,130)     | 91.4   | (74.0 to 108.8)    |
|      | DALYs  | Male   | 1990 | 6,569  | (4,435 to 9,662)   | 1684.6 | (1157.3 to 2336.8) |
|      |        |        | 2013 | 10,709 | (7,558 to 14,238)  | 1438.3 | (1037.4 to 1840.4) |
|      |        | Female | 1990 | 8,767  | (5,699 to 13,224)  | 1916.7 | (1347.6 to 2805.6) |
|      |        |        | 2013 | 7,499  | (5,149 to 9,829)   | 1244.9 | (858.9 to 1603.7)  |
|      |        | Both   | 1990 | 15,337 | (11,428 to 21,185) | 1779.1 | (1378.0 to 2347.8) |
|      |        |        | 2013 | 18,209 | (14,135 to 22,416) | 1346.7 | (1070.1 to 1628.2) |
|      | YLDs   | Male   | 1990 | 43     | (28 to 62)         | 10.6   | (6.9 to 15.0)      |

|           |         |        | 2013 | 113       | (74 to 161)              | 10.5   | (6.9 to 15.1)        |
|-----------|---------|--------|------|-----------|--------------------------|--------|----------------------|
|           |         | Female | 1990 | 29        | (19 to 41)               | 8.6    | (5.6 to 11.9)        |
|           |         |        | 2013 | 59        | (40 to 81)               | 8.7    | (6.0 to 11.9)        |
|           |         | Both   | 1990 | 73        | (49 to 99)               | 9.6    | (6.5 to 12.8)        |
|           |         |        | 2013 | 172       | (118 to 238)             | 9.7    | (6.8 to 13.3)        |
| Pakistan  | Deaths  | Male   | 1990 | 22,608    | (16,836 to 29,202)       | 100.3  | (74.4 to 128.7)      |
|           |         |        | 2013 | 57,255    | (41,474 to 74,014)       | 141.9  | (105.3 to 180.1)     |
|           |         | Female | 1990 | 28,693    | (20,081 to 35,313)       | 154.4  | (108.4 to 190.5)     |
|           |         |        | 2013 | 61,288    | (39,423 to 86,657)       | 164.3  | (107.7 to 227.4)     |
|           |         | Both   | 1990 | 51,302    | (38,975 to 61,313)       | 124.7  | (94.6 to 148.9)      |
| Country   | measure | sex    | year | number    | Uncertainty Interval     | Rate   | Uncertainty Interval |
|           |         |        | 2013 | 118,544   | (89,238 to 147,413)      | 152.7  | (115.2 to 187.5)     |
|           | DALYs   | Male   | 1990 | 491,740   | (369,609 to 639,686)     | 1697.3 | (1265.9 to 2190.9)   |
|           |         |        | 2013 | 1,203,732 | (829,626 to 1,619,971)   | 2389.7 | (1690.3 to 3129.6)   |
|           |         | Female | 1990 | 597,171   | (423,690 to 742,821)     | 2546.9 | (1781.0 to 3146.9)   |
|           |         |        | 2013 | 1,196,097 | (768,952 to 1,727,168)   | 2592.8 | (1666.2 to 3693.6)   |
|           |         | Both   | 1990 | 1,088,911 | (842,868 to 1,303,849)   | 2082.3 | (1594.2 to 2491.0)   |
|           |         |        | 2013 | 2,399,830 | (1,819,573 to 3,051,319) | 2488.1 | (1878.7 to 3128.0)   |
|           | YLDs    | Male   | 1990 | 13,104    | (8,506 to 17,936)        | 42.4   | (28.0 to 57.6)       |
|           |         |        | 2013 | 29,125    | (19,381 to 39,989)       | 54.9   | (36.8 to 75.6)       |
|           |         | Female | 1990 | 8,559     | (5,556 to 11,845)        | 32.2   | (20.6 to 44.6)       |
|           |         |        | 2013 | 16,127    | (10,371 to 22,809)       | 29.9   | (19.1 to 42.8)       |
|           |         | Both   | 1990 | 21,663    | (14,749 to 28,869)       | 37.7   | (25.4 to 50.0)       |
|           |         |        | 2013 | 45,253    | (31,560 to 61,131)       | 42.7   | (30.0 to 57.6)       |
| Palestine | Deaths  | Male   | 1990 | 350       | (250 to 468)             | 145.5  | (105.5 to 193.1)     |
|           |         |        | 2013 | 802       | (569 to 1,089)           | 135.3  | (98.1 to 179.7)      |
|           |         | Female | 1990 | 468       | (344 to 639)             | 174    | (126.5 to 230.8)     |

|         |         |        |      |        |                      |        |                      |
|---------|---------|--------|------|--------|----------------------|--------|----------------------|
|         |         |        | 2013 | 769    | (595 to 1,038)       | 126.1  | (97.9 to 166.4)      |
|         |         | Both   | 1990 | 819    | (661 to 1,017)       | 161.3  | (129.5 to 196.3)     |
|         |         |        | 2013 | 1,571  | (1,281 to 1,923)     | 131.5  | (108.2 to 159.0)     |
|         | DALYs   | Male   | 1990 | 10,975 | (7,911 to 14,820)    | 2482.5 | (1738.0 to 3372.8)   |
|         |         |        | 2013 | 19,370 | (13,674 to 26,151)   | 2193.7 | (1553.1 to 2990.7)   |
|         |         | Female | 1990 | 13,485 | (9,461 to 18,662)    | 2838.7 | (2027.9 to 3925.2)   |
|         |         |        | 2013 | 15,339 | (11,565 to 20,574)   | 1729   | (1311.7 to 2356.8)   |
|         |         | Both   | 1990 | 24,461 | (19,238 to 31,234)   | 2672.1 | (2128.7 to 3330.2)   |
|         |         |        | 2013 | 34,710 | (27,644 to 42,826)   | 1959.8 | (1580.2 to 2414.2)   |
|         | YLDs    | Male   | 1990 | 51     | (34 to 71)           | 13.4   | (9.0 to 18.6)        |
|         |         |        | 2013 | 133    | (89 to 189)          | 13.7   | (9.1 to 19.5)        |
|         |         | Female | 1990 | 42     | (29 to 60)           | 10.6   | (7.2 to 14.9)        |
|         |         |        | 2013 | 110    | (72 to 154)          | 11.1   | (7.5 to 15.5)        |
|         |         | Both   | 1990 | 94     | (65 to 128)          | 11.9   | (8.3 to 16.1)        |
|         |         |        | 2013 | 244    | (167 to 331)         | 12.3   | (8.4 to 16.8)        |
| Panama  | Deaths  | Male   | 1990 | 561    | (477 to 676)         | 103.4  | (87.2 to 124.8)      |
|         |         |        | 2013 | 1,126  | (903 to 1,367)       | 82.4   | (66.4 to 99.9)       |
|         |         | Female | 1990 | 563    | (471 to 669)         | 92.7   | (77.6 to 110.9)      |
|         |         |        | 2013 | 1,040  | (829 to 1,259)       | 66.6   | (53.3 to 80.6)       |
|         |         | Both   | 1990 | 1,124  | (1,007 to 1,274)     | 97.9   | (87.7 to 111.0)      |
|         |         |        | 2013 | 2,166  | (1,876 to 2,487)     | 74.2   | (64.3 to 85.2)       |
|         | DALYs   | Male   | 1990 | 10,032 | (8,605 to 11,968)    | 1539.5 | (1320.6 to 1848.4)   |
|         |         |        | 2013 | 17,823 | (14,107 to 22,127)   | 1205.5 | (955.2 to 1486.3)    |
|         |         | Female | 1990 | 8,873  | (7,334 to 10,193)    | 1283.1 | (1068.6 to 1487.0)   |
|         |         |        | 2013 | 13,028 | (10,552 to 16,283)   | 815.9  | (661.2 to 1018.9)    |
|         |         | Both   | 1990 | 18,906 | (16,941 to 21,050)   | 1407.6 | (1264.2 to 1576.4)   |
|         |         |        |      |        |                      |        | Uncertainty Interval |
| Country | measure | sex    | year | number | Uncertainty Interval | Rate   | Interval             |
|         |         |        | 2013 | 30,852 | (26,632 to 35,930)   | 1004.5 | (869.4 to 1167.5)    |

|                  |        |        |      |        |                    |        |                    |
|------------------|--------|--------|------|--------|--------------------|--------|--------------------|
|                  | YLDs   | Male   | 1990 | 179    | (120 to 247)       | 25.3   | (16.8 to 35.1)     |
|                  |        |        | 2013 | 420    | (278 to 586)       | 27.5   | (18.2 to 38.8)     |
|                  |        | Female | 1990 | 132    | (89 to 181)        | 18.3   | (12.4 to 25.6)     |
|                  |        |        | 2013 | 294    | (197 to 406)       | 18.1   | (12.2 to 25.0)     |
|                  |        | Both   | 1990 | 311    | (213 to 417)       | 21.8   | (15.1 to 29.1)     |
|                  |        |        | 2013 | 714    | (490 to 966)       | 22.7   | (15.4 to 30.6)     |
| Papua New Guinea | Deaths | Male   | 1990 | 522    | (317 to 767)       | 82     | (51.6 to 113.8)    |
|                  |        |        | 2013 | 1,096  | (669 to 1,627)     | 86     | (55.4 to 119.2)    |
|                  |        | Female | 1990 | 273    | (170 to 442)       | 40.3   | (26.0 to 64.5)     |
|                  |        |        | 2013 | 576    | (367 to 900)       | 40.6   | (26.7 to 62.6)     |
|                  |        | Both   | 1990 | 796    | (514 to 1,158)     | 58.2   | (40.0 to 79.9)     |
|                  |        |        | 2013 | 1,672  | (1,067 to 2,408)   | 60     | (40.5 to 81.6)     |
|                  | DALYs  | Male   | 1990 | 17,945 | (11,268 to 26,613) | 1817.5 | (1120.6 to 2611.2) |
|                  |        |        | 2013 | 34,819 | (21,458 to 52,977) | 1844.8 | (1160.6 to 2681.9) |
|                  |        | Female | 1990 | 8,121  | (5,193 to 13,217)  | 857.1  | (545.0 to 1362.5)  |
|                  |        |        | 2013 | 15,496 | (9,685 to 24,249)  | 823.3  | (532.8 to 1269.6)  |
|                  |        | Both   | 1990 | 26,067 | (17,145 to 38,223) | 1308.1 | (872.6 to 1863.2)  |
|                  |        |        | 2013 | 50,316 | (32,658 to 75,055) | 1295.3 | (848.2 to 1836.3)  |
|                  | YLDs   | Male   | 1990 | 396    | (260 to 552)       | 57.8   | (38.2 to 80.1)     |
|                  |        |        | 2013 | 827    | (554 to 1,127)     | 58.1   | (39.5 to 80.6)     |
|                  |        | Female | 1990 | 311    | (207 to 427)       | 41.3   | (27.6 to 57.3)     |
|                  |        |        | 2013 | 619    | (421 to 847)       | 37.8   | (25.5 to 50.9)     |
|                  |        | Both   | 1990 | 707    | (481 to 957)       | 48.5   | (33.4 to 65.4)     |
|                  |        |        | 2013 | 1,446  | (997 to 1,926)     | 46.7   | (32.2 to 62.0)     |
| Paraguay         | Deaths | Male   | 1990 | 927    | (796 to 1,104)     | 123.9  | (105.5 to 147.3)   |
|                  |        |        | 2013 | 2,091  | (1,667 to 2,578)   | 115.9  | (92.8 to 142.5)    |
|                  |        | Female | 1990 | 1,088  | (880 to 1,227)     | 121.7  | (97.9 to 137.3)    |
|                  |        |        | 2013 | 2,197  | (1,673 to 2,807)   | 109.1  | (82.8 to 138.6)    |

|         |         |        |      |         |                      |        |                      |
|---------|---------|--------|------|---------|----------------------|--------|----------------------|
|         |         | Both   | 1990 | 2,016   | (1,784 to 2,224)     | 122.8  | (108.0 to 135.6)     |
|         |         |        | 2013 | 4,289   | (3,608 to 5,119)     | 112.7  | (94.7 to 134.5)      |
|         | DALYs   | Male   | 1990 | 19,514  | (16,852 to 22,925)   | 2010   | (1737.2 to 2379.6)   |
|         |         |        | 2013 | 41,482  | (32,899 to 51,677)   | 1962.2 | (1568.9 to 2432.3)   |
|         |         | Female | 1990 | 20,423  | (16,587 to 23,205)   | 1925.8 | (1562.4 to 2177.7)   |
|         |         |        | 2013 | 37,443  | (28,272 to 48,736)   | 1703.1 | (1282.8 to 2213.8)   |
|         |         | Both   | 1990 | 39,937  | (35,529 to 43,965)   | 1964.3 | (1739.7 to 2160.6)   |
|         |         |        | 2013 | 78,926  | (66,081 to 94,133)   | 1832.7 | (1536.1 to 2188.4)   |
|         | YLDs    | Male   | 1990 | 439     | (293 to 608)         | 43.4   | (29.3 to 60.5)       |
|         |         |        | 2013 | 926     | (615 to 1,288)       | 42.4   | (28.1 to 58.2)       |
|         |         | Female | 1990 | 307     | (209 to 442)         | 28     | (18.8 to 41.0)       |
|         |         |        | 2013 | 616     | (415 to 854)         | 26.9   | (17.8 to 37.3)       |
|         |         | Both   | 1990 | 747     | (515 to 1,028)       | 35.3   | (24.5 to 48.5)       |
|         |         |        |      |         |                      |        | Uncertainty Interval |
| Country | measure | sex    | year | number  | Uncertainty Interval | Rate   | Interval             |
|         |         |        | 2013 | 1,543   | (1,047 to 2,101)     | 34.5   | (23.5 to 46.5)       |
| Peru    | Deaths  | Male   | 1990 | 2,551   | (2,131 to 2,981)     | 62.4   | (50.7 to 73.4)       |
|         |         |        | 2013 | 4,368   | (3,391 to 5,702)     | 48.8   | (38.1 to 63.3)       |
|         |         | Female | 1990 | 2,915   | (2,228 to 3,381)     | 63.4   | (46.3 to 71.3)       |
|         |         |        | 2013 | 4,615   | (3,602 to 6,607)     | 42.7   | (33.6 to 61.7)       |
|         |         | Both   | 1990 | 5,466   | (4,596 to 6,056)     | 63.2   | (51.5 to 70.1)       |
|         |         |        | 2013 | 8,983   | (7,502 to 11,373)    | 45.5   | (38.1 to 58.5)       |
|         | DALYs   | Male   | 1990 | 64,067  | (53,947 to 74,715)   | 1088.2 | (913.9 to 1268.4)    |
|         |         |        | 2013 | 89,074  | (66,887 to 117,581)  | 815.9  | (622.0 to 1068.8)    |
|         |         | Female | 1990 | 60,318  | (49,195 to 74,939)   | 994.3  | (779.0 to 1181.6)    |
|         |         |        | 2013 | 78,419  | (58,779 to 108,392)  | 659.9  | (504.7 to 924.3)     |
|         |         | Both   | 1990 | 124,386 | (109,200 to 142,152) | 1041.9 | (891.1 to 1159.4)    |
|         |         |        | 2013 | 167,494 | (137,567 to 209,811) | 734.5  | (606.7 to 920.8)     |
|         | YLDs    | Male   | 1990 | 1,080   | (735 to 1,497)       | 18.7   | (12.7 to 25.6)       |

|             |        |        |      |           |                          |        |                    |
|-------------|--------|--------|------|-----------|--------------------------|--------|--------------------|
|             |        |        | 2013 | 2,393     | (1,573 to 3,279)         | 21.7   | (14.3 to 29.6)     |
|             |        | Female | 1990 | 706       | (473 to 977)             | 11.4   | (7.7 to 15.8)      |
|             |        |        | 2013 | 1,361     | (924 to 1,872)           | 11.2   | (7.6 to 15.2)      |
|             |        | Both   | 1990 | 1,786     | (1,259 to 2,382)         | 14.9   | (10.6 to 20.0)     |
|             |        |        | 2013 | 3,754     | (2,608 to 4,985)         | 16.1   | (11.2 to 21.5)     |
| Philippines | Deaths | Male   | 1990 | 13,968    | (12,057 to 16,246)       | 140    | (120.5 to 163.8)   |
|             |        |        | 2013 | 34,642    | (26,741 to 43,959)       | 179.7  | (142.4 to 224.6)   |
|             |        | Female | 1990 | 10,740    | (9,003 to 12,823)        | 97.4   | (79.5 to 116.2)    |
|             |        |        | 2013 | 27,407    | (20,348 to 35,174)       | 122.5  | (91.0 to 154.7)    |
|             |        | Both   | 1990 | 24,709    | (22,490 to 27,611)       | 116.6  | (105.3 to 130.5)   |
|             |        |        | 2013 | 62,049    | (51,832 to 74,052)       | 147.7  | (125.0 to 173.0)   |
|             | DALYs  | Male   | 1990 | 392,931   | (340,870 to 460,986)     | 2777.9 | (2404.3 to 3217.7) |
|             |        |        | 2013 | 913,931   | (688,129 to 1,186,876)   | 3445.8 | (2678.3 to 4359.0) |
|             |        | Female | 1990 | 243,820   | (208,748 to 296,321)     | 1671.3 | (1429.4 to 2014.8) |
|             |        |        | 2013 | 587,157   | (437,286 to 772,439)     | 2045.7 | (1523.9 to 2645.5) |
|             |        | Both   | 1990 | 636,751   | (578,081 to 725,732)     | 2189.4 | (1997.8 to 2449.7) |
|             |        |        | 2013 | 1,501,088 | (1,234,567 to 1,833,385) | 2687   | (2252.4 to 3215.2) |
|             | YLDs   | Male   | 1990 | 6,455     | (4,323 to 8,845)         | 57.3   | (39.1 to 79.0)     |
|             |        |        | 2013 | 14,216    | (9,698 to 19,291)        | 60.7   | (42.1 to 82.3)     |
|             |        | Female | 1990 | 5,805     | (4,025 to 7,875)         | 43.7   | (29.9 to 59.8)     |
|             |        |        | 2013 | 12,156    | (8,043 to 17,335)        | 44.2   | (29.5 to 63.5)     |
|             |        | Both   | 1990 | 12,261    | (8,419 to 16,148)        | 49.7   | (34.8 to 65.7)     |
|             |        |        | 2013 | 26,372    | (18,249 to 35,492)       | 51.6   | (36.0 to 69.4)     |
| Poland      | Deaths | Male   | 1990 | 31,416    | (27,583 to 37,196)       | 230.1  | (202.9 to 271.3)   |
|             |        |        | 2013 | 30,556    | (25,671 to 34,885)       | 138.7  | (116.4 to 158.1)   |
|             |        | Female | 1990 | 44,992    | (36,651 to 48,247)       | 187.3  | (152.8 to 200.8)   |
|             |        |        | 2013 | 38,181    | (33,045 to 48,685)       | 91.9   | (80.3 to 116.6)    |
|             |        | Both   | 1990 | 76,409    | (67,846 to 82,316)       | 205.3  | (182.2 to 221.0)   |



| Country  | measure | sex    | year | number    | Uncertainty Interval     | Rate   | Uncertainty Interval |
|----------|---------|--------|------|-----------|--------------------------|--------|----------------------|
|          |         |        | 2013 | 68,737    | (62,031 to 79,522)       | 110.8  | (100.5 to 127.7)     |
|          | DALYs   | Male   | 1990 | 556,830   | (487,133 to 677,579)     | 3595.1 | (3147.3 to 4310.2)   |
|          |         |        | 2013 | 474,039   | (389,880 to 544,621)     | 2063.1 | (1702.8 to 2360.9)   |
|          |         | Female | 1990 | 582,467   | (475,596 to 627,383)     | 2492.2 | (2031.2 to 2692.4)   |
|          |         |        | 2013 | 395,773   | (349,967 to 506,360)     | 1097.6 | (972.0 to 1413.3)    |
|          |         | Both   | 1990 | 1,139,297 | (1,031,590 to 1,249,948) | 2968.3 | (2683.9 to 3251.2)   |
|          |         |        | 2013 | 869,813   | (786,957 to 991,229)     | 1510.2 | (1364.9 to 1712.7)   |
|          | YLDs    | Male   | 1990 | 3,924     | (2,540 to 5,624)         | 22.6   | (14.7 to 32.1)       |
|          |         |        | 2013 | 6,437     | (4,245 to 9,381)         | 27.2   | (17.9 to 39.8)       |
|          |         | Female | 1990 | 3,403     | (2,209 to 4,869)         | 15.3   | (10.0 to 21.8)       |
|          |         |        | 2013 | 4,949     | (3,060 to 7,154)         | 16.2   | (10.1 to 23.1)       |
|          |         | Both   | 1990 | 7,327     | (4,963 to 9,971)         | 18.6   | (12.6 to 25.2)       |
|          |         |        | 2013 | 11,386    | (7,796 to 15,646)        | 21.1   | (14.4 to 28.9)       |
| Portugal | Deaths  | Male   | 1990 | 10,421    | (9,402 to 11,634)        | 206.9  | (186.1 to 230.9)     |
|          |         |        | 2013 | 8,857     | (7,580 to 9,984)         | 104.9  | (90.0 to 118.5)      |
|          |         | Female | 1990 | 14,066    | (11,483 to 15,155)       | 174    | (142.6 to 187.8)     |
|          |         |        | 2013 | 10,263    | (8,396 to 14,588)        | 73.7   | (60.7 to 104.2)      |
|          |         | Both   | 1990 | 24,487    | (21,690 to 26,101)       | 188.8  | (167.1 to 201.3)     |
|          |         |        | 2013 | 19,121    | (16,769 to 23,472)       | 87.1   | (76.9 to 106.2)      |
|          | DALYs   | Male   | 1990 | 165,948   | (148,857 to 186,623)     | 3126.8 | (2804.6 to 3521.6)   |
|          |         |        | 2013 | 121,636   | (105,003 to 136,333)     | 1513.6 | (1299.7 to 1695.8)   |
|          |         | Female | 1990 | 172,262   | (142,273 to 184,235)     | 2269.4 | (1864.3 to 2425.0)   |
|          |         |        | 2013 | 106,157   | (88,663 to 147,012)      | 896.3  | (749.4 to 1251.3)    |
|          |         | Both   | 1990 | 338,211   | (305,766 to 360,103)     | 2649.7 | (2395.7 to 2824.4)   |
|          |         |        | 2013 | 227,793   | (203,520 to 269,945)     | 1170.8 | (1046.2 to 1377.5)   |

|         |         |        |      |        |                      |        |                      |
|---------|---------|--------|------|--------|----------------------|--------|----------------------|
|         | YLDs    | Male   | 1990 | 6,195  | (4,160 to 8,681)     | 114.6  | (76.5 to 159.6)      |
|         |         |        | 2013 | 8,289  | (5,525 to 11,302)    | 105.4  | (70.1 to 143.3)      |
|         |         | Female | 1990 | 6,443  | (4,311 to 9,134)     | 89.1   | (59.7 to 125.4)      |
|         |         |        | 2013 | 10,529 | (6,965 to 14,220)    | 99.4   | (65.6 to 132.5)      |
|         |         | Both   | 1990 | 12,639 | (8,655 to 17,070)    | 100    | (68.8 to 135.1)      |
|         |         |        | 2013 | 18,819 | (13,079 to 24,711)   | 102.2  | (70.8 to 134.8)      |
| Qatar   | Deaths  | Male   | 1990 | 44     | (35 to 56)           | 64.1   | (50.9 to 82.5)       |
|         |         |        | 2013 | 82     | (62 to 105)          | 34.6   | (26.8 to 44.8)       |
|         |         | Female | 1990 | 34     | (23 to 43)           | 98.6   | (66.5 to 123.0)      |
|         |         |        | 2013 | 39     | (29 to 54)           | 44.5   | (33.8 to 60.2)       |
|         |         | Both   | 1990 | 79     | (67 to 92)           | 77.7   | (65.3 to 90.5)       |
|         |         |        | 2013 | 122    | (100 to 147)         | 39.6   | (32.7 to 47.8)       |
|         | DALYs   | Male   | 1990 | 1,523  | (1,227 to 1,934)     | 983.3  | (800.3 to 1245.3)    |
|         |         |        | 2013 | 2,866  | (2,176 to 3,701)     | 461.1  | (362.3 to 578.1)     |
|         |         | Female | 1990 | 1,054  | (664 to 1,349)       | 1530.6 | (989.1 to 1921.6)    |
|         |         |        | 2013 | 977    | (714 to 1,375)       | 519.7  | (393.0 to 705.2)     |
|         |         |        |      |        |                      |        | Uncertainty Interval |
| Country | measure | sex    | year | number | Uncertainty Interval | Rate   | Interval             |
|         |         | Both   | 1990 | 2,578  | (2,161 to 3,040)     | 1173   | (984.5 to 1363.1)    |
|         |         |        | 2013 | 3,844  | (3,115 to 4,707)     | 491.1  | (410.0 to 582.0)     |
|         | YLDs    | Male   | 1990 | 18     | (11 to 27)           | 10.7   | (6.9 to 15.7)        |
|         |         |        | 2013 | 100    | (64 to 147)          | 10.9   | (7.2 to 15.7)        |
|         |         | Female | 1990 | 5      | (3 to 7)             | 8.3    | (5.4 to 11.9)        |
|         |         |        | 2013 | 21     | (14 to 30)           | 8.7    | (5.8 to 12.2)        |
|         |         | Both   | 1990 | 23     | (15 to 33)           | 9.9    | (6.6 to 14.1)        |
|         |         |        | 2013 | 122    | (80 to 173)          | 10.2   | (7.0 to 14.3)        |
| Romania | Deaths  | Male   | 1990 | 25,677 | (22,836 to 29,208)   | 262.8  | (233.8 to 297.8)     |
|         |         |        | 2013 | 25,036 | (21,514 to 28,604)   | 190.4  | (163.4 to 217.6)     |
|         |         | Female | 1990 | 32,045 | (28,326 to 36,004)   | 238.2  | (210.1 to 269.1)     |

|        |        |        |      |           |                          |        |                    |
|--------|--------|--------|------|-----------|--------------------------|--------|--------------------|
|        |        |        | 2013 | 32,492    | (27,781 to 36,541)       | 155.6  | (133.3 to 174.7)   |
|        |        | Both   | 1990 | 57,723    | (53,429 to 62,582)       | 249.4  | (230.2 to 269.8)   |
|        |        |        | 2013 | 57,528    | (51,255 to 62,771)       | 170.6  | (152.4 to 186.1)   |
|        | DALYs  | Male   | 1990 | 445,959   | (394,639 to 509,419)     | 4105.6 | (3636.2 to 4675.6) |
|        |        |        | 2013 | 365,217   | (312,418 to 414,788)     | 2728.8 | (2338.6 to 3090.6) |
|        |        | Female | 1990 | 470,433   | (415,531 to 529,713)     | 3379.9 | (2987.0 to 3812.2) |
|        |        |        | 2013 | 368,938   | (320,501 to 415,319)     | 1897.9 | (1662.5 to 2159.0) |
|        |        | Both   | 1990 | 916,392   | (846,509 to 994,333)     | 3713.1 | (3430.5 to 4026.0) |
|        |        |        | 2013 | 734,156   | (662,476 to 801,789)     | 2266.3 | (2050.4 to 2477.9) |
|        | YLDs   | Male   | 1990 | 3,287     | (2,139 to 4,613)         | 28.2   | (18.4 to 39.4)     |
|        |        |        | 2013 | 4,164     | (2,734 to 5,915)         | 31.3   | (20.6 to 44.5)     |
|        |        | Female | 1990 | 2,688     | (1,754 to 3,737)         | 19.5   | (12.7 to 27.0)     |
|        |        |        | 2013 | 2,973     | (1,913 to 4,332)         | 17.9   | (11.7 to 26.0)     |
|        |        | Both   | 1990 | 5,975     | (4,042 to 8,066)         | 23.5   | (15.9 to 31.6)     |
|        |        |        | 2013 | 7,137     | (4,803 to 9,819)         | 24     | (16.1 to 32.9)     |
| Russia | Deaths | Male   | 1990 | 107,127   | (91,270 to 121,713)      | 262.1  | (225.6 to 296.0)   |
|        |        |        | 2013 | 144,866   | (125,706 to 168,925)     | 222.4  | (193.4 to 257.6)   |
|        |        | Female | 1990 | 239,766   | (199,967 to 265,033)     | 222.6  | (185.3 to 246.1)   |
|        |        |        | 2013 | 215,421   | (191,329 to 285,011)     | 149.2  | (133.3 to 197.5)   |
|        |        | Both   | 1990 | 346,894   | (300,196 to 372,526)     | 235.3  | (203.6 to 253.1)   |
|        |        |        | 2013 | 360,288   | (327,838 to 438,804)     | 175.7  | (160.1 to 213.0)   |
|        | DALYs  | Male   | 1990 | 2,046,862 | (1,716,101 to 2,353,786) | 4026.1 | (3412.5 to 4578.4) |
|        |        |        | 2013 | 2,649,544 | (2,291,804 to 3,095,248) | 3689.6 | (3206.1 to 4279.9) |
|        |        | Female | 1990 | 3,321,579 | (2,756,493 to 3,654,762) | 3123.1 | (2588.8 to 3446.4) |
|        |        |        | 2013 | 2,680,162 | (2,396,671 to 3,556,617) | 2040.6 | (1827.7 to 2722.2) |

|         |         | Both   | 1990 | 5,368,442 | (4,644,873 to 5,800,348) | 3428.8 | (2967.7 to 3695.1)   |
|---------|---------|--------|------|-----------|--------------------------|--------|----------------------|
|         |         |        | 2013 | 5,329,706 | (4,841,366 to 6,415,056) | 2675.4 | (2425.6 to 3202.5)   |
| Country | measure | sex    | year | number    | Uncertainty Interval     | Rate   | Uncertainty Interval |
|         | YLDs    | Male   | 1990 | 17,035    | (10,601 to 25,494)       | 27     | (17.1 to 39.5)       |
|         |         |        | 2013 | 21,751    | (13,250 to 33,393)       | 28.3   | (17.4 to 43.2)       |
|         |         | Female | 1990 | 20,848    | (13,351 to 29,977)       | 20.8   | (13.6 to 29.8)       |
|         |         |        | 2013 | 21,780    | (12,854 to 32,674)       | 18.8   | (11.4 to 28.0)       |
|         |         | Both   | 1990 | 37,883    | (25,376 to 51,570)       | 23.4   | (15.7 to 32.0)       |
|         |         |        | 2013 | 43,532    | (28,729 to 62,132)       | 22.6   | (15.1 to 32.0)       |
| Rwanda  | Deaths  | Male   | 1990 | 2,492     | (1,899 to 3,108)         | 295    | (227.9 to 361.2)     |
|         |         |        | 2013 | 2,072     | (1,571 to 2,655)         | 147.4  | (112.7 to 186.7)     |
|         |         | Female | 1990 | 2,935     | (2,000 to 3,942)         | 292.7  | (201.3 to 385.7)     |
|         |         |        | 2013 | 2,121     | (1,428 to 3,130)         | 132.3  | (89.1 to 190.3)      |
|         |         | Both   | 1990 | 5,428     | (4,361 to 6,643)         | 294.8  | (235.4 to 358.6)     |
|         |         |        | 2013 | 4,193     | (3,326 to 5,195)         | 139.2  | (109.9 to 172.4)     |
|         | DALYs   | Male   | 1990 | 66,763    | (49,555 to 85,219)       | 5672.4 | (4320.8 to 7049.8)   |
|         |         |        | 2013 | 45,062    | (33,780 to 59,300)       | 2424.6 | (1843.8 to 3117.6)   |
|         |         | Female | 1990 | 69,783    | (45,111 to 95,301)       | 5389.7 | (3633.3 to 7255.2)   |
|         |         |        | 2013 | 39,763    | (26,905 to 60,409)       | 1981.9 | (1347.6 to 2949.9)   |
|         |         | Both   | 1990 | 136,547   | (107,638 to 170,144)     | 5537.5 | (4434.0 to 6783.4)   |
|         |         |        | 2013 | 84,825    | (67,025 to 106,867)      | 2185.8 | (1736.0 to 2703.7)   |
|         | YLDs    | Male   | 1990 | 181       | (115 to 266)             | 12.6   | (7.8 to 18.7)        |
|         |         |        | 2013 | 337       | (218 to 485)             | 13.5   | (8.9 to 19.4)        |
|         |         | Female | 1990 | 144       | (93 to 203)              | 9.7    | (6.4 to 13.9)        |
|         |         |        | 2013 | 267       | (163 to 389)             | 9.4    | (5.5 to 13.9)        |
|         |         | Both   | 1990 | 326       | (223 to 457)             | 11.1   | (7.6 to 15.5)        |

|                                  |         |        | 2013 | 605    | (396 to 837)         | 11.3   | (7.6 to 15.5)        |
|----------------------------------|---------|--------|------|--------|----------------------|--------|----------------------|
| Saint Lucia                      | Deaths  | Male   | 1990 | 65     | (55 to 78)           | 155.4  | (133.0 to 186.2)     |
|                                  |         |        | 2013 | 81     | (61 to 105)          | 108.5  | (81.4 to 139.7)      |
|                                  |         | Female | 1990 | 87     | (72 to 100)          | 170.3  | (142.2 to 196.9)     |
|                                  |         |        | 2013 | 109    | (81 to 138)          | 111.8  | (82.8 to 141.6)      |
|                                  |         | Both   | 1990 | 153    | (137 to 170)         | 164.7  | (146.8 to 183.9)     |
|                                  |         |        | 2013 | 191    | (152 to 228)         | 111.2  | (88.8 to 132.7)      |
|                                  | DALYs   | Male   | 1990 | 1,306  | (1,131 to 1,545)     | 2793.3 | (2407.7 to 3310.1)   |
|                                  |         |        | 2013 | 1,429  | (1,071 to 1,877)     | 1819.9 | (1366.7 to 2373.8)   |
|                                  |         | Female | 1990 | 1,483  | (1,230 to 1,708)     | 2795.6 | (2325.1 to 3210.8)   |
|                                  |         |        | 2013 | 1,489  | (1,093 to 1,931)     | 1616.7 | (1184.5 to 2103.8)   |
|                                  |         | Both   | 1990 | 2,790  | (2,526 to 3,103)     | 2805.4 | (2527.3 to 3112.6)   |
|                                  |         |        | 2013 | 2,918  | (2,359 to 3,485)     | 1720.2 | (1387.3 to 2055.8)   |
|                                  | YLDs    | Male   | 1990 | 27     | (18 to 37)           | 61.8   | (42.1 to 85.5)       |
|                                  |         |        | 2013 | 47     | (32 to 64)           | 60.9   | (41.6 to 83.4)       |
|                                  |         | Female | 1990 | 23     | (14 to 32)           | 44.9   | (29.2 to 62.5)       |
|                                  |         |        | 2013 | 42     | (28 to 57)           | 46.4   | (30.4 to 62.7)       |
|                                  |         | Both   | 1990 | 50     | (34 to 67)           | 52.7   | (36.2 to 70.6)       |
|                                  |         |        | 2013 | 90     | (62 to 120)          | 53.1   | (36.8 to 70.7)       |
| Country                          | measure | sex    | year | number | Uncertainty Interval | Rate   | Uncertainty Interval |
| Saint Vincent and the Grenadines | Deaths  | Male   | 1990 | 39     | (32 to 46)           | 143.8  | (119.9 to 169.9)     |
|                                  |         |        | 2013 | 40     | (32 to 51)           | 110.8  | (87.5 to 139.2)      |
|                                  |         | Female | 1990 | 61     | (49 to 70)           | 167.4  | (134.2 to 190.6)     |
|                                  |         |        | 2013 | 53     | (40 to 64)           | 119.3  | (91.6 to 144.5)      |
|                                  |         | Both   | 1990 | 101    | (88 to 112)          | 158.2  | (137.0 to 176.4)     |
|                                  |         |        | 2013 | 93     | (77 to 110)          | 116.5  | (95.9 to 136.8)      |

|       |        |        |      |       |                  |        |                    |
|-------|--------|--------|------|-------|------------------|--------|--------------------|
|       | DALYs  | Male   | 1990 | 789   | (664 to 930)     | 2549.1 | (2149.6 to 2987.7) |
|       |        |        | 2013 | 811   | (643 to 1,028)   | 1903.7 | (1509.9 to 2400.5) |
|       |        | Female | 1990 | 1,043 | (853 to 1,178)   | 2773.5 | (2267.6 to 3147.4) |
|       |        |        | 2013 | 830   | (632 to 1,022)   | 1806.3 | (1377.9 to 2216.2) |
|       |        | Both   | 1990 | 1,832 | (1,591 to 2,010) | 2680.7 | (2330.9 to 2955.6) |
|       |        |        | 2013 | 1,641 | (1,373 to 1,932) | 1864.5 | (1557.3 to 2202.9) |
|       | YLDs   | Male   | 1990 | 16    | (10 to 23)       | 57.8   | (37.5 to 82.6)     |
|       |        |        | 2013 | 23    | (15 to 32)       | 55.5   | (37.6 to 77.3)     |
|       |        | Female | 1990 | 14    | (10 to 20)       | 40.9   | (28.1 to 56.7)     |
|       |        |        | 2013 | 20    | (13 to 28)       | 44.1   | (28.5 to 62.1)     |
|       |        | Both   | 1990 | 31    | (21 to 42)       | 48.4   | (33.0 to 65.4)     |
|       |        |        | 2013 | 43    | (29 to 58)       | 49.5   | (33.6 to 66.6)     |
| Samoa | Deaths | Male   | 1990 | 63    | (42 to 83)       | 210.6  | (141.3 to 269.0)   |
|       |        |        | 2013 | 68    | (49 to 87)       | 151.7  | (108.8 to 191.5)   |
|       |        | Female | 1990 | 32    | (20 to 55)       | 102.5  | (67.3 to 174.6)    |
|       |        |        | 2013 | 60    | (42 to 86)       | 102.6  | (72.4 to 145.9)    |
|       |        | Both   | 1990 | 96    | (72 to 128)      | 152    | (116.2 to 202.5)   |
|       |        |        | 2013 | 129   | (99 to 162)      | 123.8  | (95.9 to 156.5)    |
|       | DALYs  | Male   | 1990 | 1,665 | (1,128 to 2,250) | 4153   | (2786.0 to 5478.8) |
|       |        |        | 2013 | 1,524 | (1,089 to 1,999) | 2699.7 | (1959.8 to 3481.0) |
|       |        | Female | 1990 | 695   | (426 to 1,192)   | 1764.1 | (1102.8 to 2978.5) |
|       |        |        | 2013 | 1,076 | (736 to 1,528)   | 1737.3 | (1202.6 to 2469.7) |
|       |        | Both   | 1990 | 2,361 | (1,725 to 3,193) | 2904.7 | (2163.7 to 3887.9) |
|       |        |        | 2013 | 2,600 | (1,995 to 3,353) | 2190.3 | (1678.3 to 2812.6) |
|       | YLDs   | Male   | 1990 | 19    | (12 to 26)       | 54.9   | (35.5 to 77.4)     |
|       |        |        | 2013 | 29    | (19 to 40)       | 55.4   | (37.0 to 76.9)     |
|       |        | Female | 1990 | 16    | (11 to 22)       | 43.2   | (29.1 to 58.7)     |
|       |        |        | 2013 | 25    | (16 to 34)       | 41.8   | (26.9 to 57.9)     |

|                       |         | Both   | 1990 | 35     | (23 to 47)           | 48.6   | (33.1 to 64.8)       |
|-----------------------|---------|--------|------|--------|----------------------|--------|----------------------|
|                       |         |        | 2013 | 54     | (37 to 74)           | 48     | (32.8 to 65.5)       |
| Sao Tome and Principe | Deaths  | Male   | 1990 | 37     | (30 to 44)           | 142.7  | (114.9 to 172.6)     |
|                       |         |        | 2013 | 54     | (37 to 71)           | 154.6  | (111.7 to 200.3)     |
|                       |         | Female | 1990 | 48     | (38 to 59)           | 161.9  | (130.4 to 203.0)     |
|                       |         |        | 2013 | 65     | (44 to 88)           | 168.1  | (116.5 to 224.5)     |
| Country               | measure | sex    | year | number | Uncertainty Interval | Rate   | Uncertainty Interval |
|                       |         | Both   | 1990 | 85     | (72 to 100)          | 153.6  | (132.0 to 183.2)     |
|                       |         |        | 2013 | 120    | (89 to 150)          | 162.1  | (126.0 to 200.5)     |
|                       | DALYs   | Male   | 1990 | 1,151  | (916 to 1,421)       | 2943.3 | (2385.2 to 3574.9)   |
|                       |         |        | 2013 | 1,502  | (932 to 2,058)       | 2991.9 | (1977.5 to 4070.4)   |
|                       |         | Female | 1990 | 1,222  | (865 to 1,542)       | 3096.2 | (2388.5 to 3868.8)   |
|                       |         |        | 2013 | 1,525  | (964 to 2,074)       | 2960.7 | (1948.0 to 4072.0)   |
|                       |         | Both   | 1990 | 2,374  | (1,902 to 2,805)     | 3027   | (2569.4 to 3550.9)   |
|                       |         |        | 2013 | 3,027  | (2,031 to 3,902)     | 2984.4 | (2135.5 to 3821.9)   |
|                       | YLDs    | Male   | 1990 | 5      | (3 to 7)             | 19.8   | (13.5 to 27.6)       |
|                       |         |        | 2013 | 8      | (5 to 11)            | 19.6   | (12.8 to 27.9)       |
|                       |         | Female | 1990 | 4      | (2 to 6)             | 14.3   | (9.5 to 20.4)        |
|                       |         |        | 2013 | 7      | (4 to 10)            | 14.7   | (9.3 to 21.3)        |
|                       |         | Both   | 1990 | 10     | (7 to 13)            | 16.9   | (11.8 to 22.6)       |
|                       |         |        | 2013 | 15     | (10 to 21)           | 16.9   | (11.5 to 23.0)       |
| Saudi Arabia          | Deaths  | Male   | 1990 | 3,118  | (2,295 to 4,178)     | 125.7  | (94.4 to 165.6)      |
|                       |         |        | 2013 | 5,105  | (3,963 to 6,736)     | 103.4  | (81.2 to 134.8)      |
|                       |         | Female | 1990 | 2,729  | (2,056 to 3,465)     | 119.8  | (90.6 to 152.9)      |
|                       |         |        | 2013 | 4,392  | (3,487 to 5,206)     | 86.8   | (69.5 to 102.4)      |
|                       |         | Both   | 1990 | 5,847  | (4,846 to 7,038)     | 122.9  | (102.9 to 147.4)     |
|                       |         |        | 2013 | 9,497  | (8,118 to 11,188)    | 95.8   | (82.5 to 112.5)      |

|         |         |        |      |         |                      |        |                      |
|---------|---------|--------|------|---------|----------------------|--------|----------------------|
|         | DALYs   | Male   | 1990 | 60,509  | (43,104 to 84,824)   | 1837.7 | (1317.8 to 2535.2)   |
|         |         |        | 2013 | 102,564 | (77,004 to 136,322)  | 1461   | (1121.9 to 1950.6)   |
|         |         | Female | 1990 | 48,305  | (34,633 to 63,825)   | 1731.4 | (1234.7 to 2250.4)   |
|         |         |        | 2013 | 62,762  | (49,376 to 76,388)   | 1093.2 | (870.5 to 1318.7)    |
|         |         | Both   | 1990 | 108,814 | (87,513 to 136,070)  | 1786.3 | (1431.7 to 2216.9)   |
|         |         |        | 2013 | 165,326 | (136,894 to 202,063) | 1292.1 | (1080.7 to 1559.9)   |
|         | YLDs    | Male   | 1990 | 222     | (142 to 324)         | 5.6    | (3.5 to 8.3)         |
|         |         |        | 2013 | 673     | (421 to 991)         | 6.7    | (4.4 to 9.6)         |
|         |         | Female | 1990 | 74      | (47 to 103)          | 2.7    | (1.7 to 3.8)         |
|         |         |        | 2013 | 237     | (150 to 341)         | 3.3    | (2.1 to 4.9)         |
|         |         | Both   | 1990 | 296     | (199 to 415)         | 4.3    | (2.9 to 6.2)         |
|         |         |        | 2013 | 910     | (596 to 1,294)       | 5.2    | (3.5 to 7.4)         |
| Senegal | Deaths  | Male   | 1990 | 1,311   | (1,048 to 1,585)     | 123    | (98.1 to 148.6)      |
|         |         |        | 2013 | 2,606   | (2,074 to 3,289)     | 142.3  | (114.9 to 175.7)     |
|         |         | Female | 1990 | 1,726   | (1,257 to 2,150)     | 148.8  | (111.1 to 188.7)     |
|         |         |        | 2013 | 4,024   | (2,760 to 5,363)     | 178.1  | (125.4 to 237.0)     |
|         |         | Both   | 1990 | 3,037   | (2,553 to 3,520)     | 137.9  | (114.4 to 162.1)     |
|         |         |        | 2013 | 6,631   | (5,281 to 8,131)     | 163    | (129.8 to 200.1)     |
|         | DALYs   | Male   | 1990 | 34,198  | (27,665 to 41,520)   | 2198.5 | (1764.4 to 2644.3)   |
|         |         |        | 2013 | 59,319  | (45,825 to 75,786)   | 2424.6 | (1919.0 to 3077.3)   |
|         |         | Female | 1990 | 40,079  | (29,979 to 50,097)   | 2456.1 | (1791.8 to 3042.1)   |
|         |         |        | 2013 | 80,409  | (53,209 to 109,032)  | 2821.7 | (1911.5 to 3767.4)   |
|         |         |        |      |         |                      |        | Uncertainty Interval |
| Country | measure | sex    | year | number  | Uncertainty Interval | Rate   | Interval             |
|         |         | Both   | 1990 | 74,278  | (62,743 to 86,146)   | 2345.4 | (1965.8 to 2709.5)   |
|         |         |        | 2013 | 139,729 | (108,244 to 171,029) | 2654   | (2096.4 to 3246.0)   |
|         | YLDs    | Male   | 1990 | 321     | (212 to 448)         | 19.4   | (12.7 to 27.6)       |
|         |         |        | 2013 | 548     | (362 to 792)         | 19     | (12.4 to 27.8)       |
|         |         | Female | 1990 | 252     | (167 to 360)         | 14.1   | (9.2 to 20.3)        |



|            |        |        |      |         |                      |        |                    |
|------------|--------|--------|------|---------|----------------------|--------|--------------------|
|            |        |        | 2013 | 508     | (328 to 721)         | 14.5   | (9.3 to 20.4)      |
|            |        | Both   | 1990 | 573     | (387 to 779)         | 16.6   | (11.1 to 22.6)     |
|            |        |        | 2013 | 1,056   | (711 to 1,458)       | 16.5   | (11.1 to 22.7)     |
| Serbia     | Deaths | Male   | 1990 | 6,385   | (5,025 to 7,934)     | 175    | (137.9 to 216.5)   |
|            |        |        | 2013 | 7,058   | (5,864 to 8,172)     | 128    | (106.0 to 149.2)   |
|            |        | Female | 1990 | 7,634   | (5,812 to 9,312)     | 148.4  | (113.7 to 181.4)   |
|            |        |        | 2013 | 9,295   | (8,047 to 10,635)    | 109.7  | (95.1 to 125.8)    |
|            |        | Both   | 1990 | 14,019  | (11,628 to 16,305)   | 159.6  | (132.3 to 185.3)   |
|            |        |        | 2013 | 16,353  | (14,569 to 17,960)   | 118    | (105.0 to 129.7)   |
|            | DALYs  | Male   | 1990 | 113,366 | (87,760 to 143,459)  | 2711.2 | (2117.0 to 3417.0) |
|            |        |        | 2013 | 107,989 | (90,185 to 123,809)  | 1859.4 | (1549.5 to 2131.5) |
|            |        | Female | 1990 | 115,115 | (85,631 to 140,754)  | 2146.6 | (1609.0 to 2617.8) |
|            |        |        | 2013 | 110,505 | (97,851 to 128,631)  | 1405.3 | (1253.0 to 1640.0) |
|            |        | Both   | 1990 | 228,481 | (186,736 to 268,472) | 2393.8 | (1964.9 to 2798.8) |
|            |        |        | 2013 | 218,494 | (196,209 to 239,416) | 1610.7 | (1446.5 to 1763.6) |
|            | YLDs   | Male   | 1990 | 1,303   | (876 to 1,804)       | 27.8   | (18.8 to 38.3)     |
|            |        |        | 2013 | 1,846   | (1,224 to 2,557)     | 31.3   | (20.8 to 43.4)     |
|            |        | Female | 1990 | 1,000   | (649 to 1,394)       | 18.1   | (11.9 to 25.5)     |
|            |        |        | 2013 | 1,243   | (814 to 1,758)       | 17.8   | (11.7 to 25.1)     |
|            |        | Both   | 1990 | 2,304   | (1,557 to 3,120)     | 22.6   | (15.2 to 30.4)     |
|            |        |        | 2013 | 3,090   | (2,127 to 4,161)     | 24     | (16.4 to 32.3)     |
| Seychelles | Deaths | Male   | 1990 | 41      | (34 to 48)           | 207.2  | (174.7 to 244.1)   |
|            |        |        | 2013 | 43      | (35 to 52)           | 136.3  | (112.6 to 165.6)   |
|            |        | Female | 1990 | 37      | (30 to 49)           | 123.6  | (103.7 to 163.9)   |
|            |        |        | 2013 | 49      | (38 to 61)           | 101    | (77.4 to 125.6)    |
|            |        | Both   | 1990 | 78      | (69 to 93)           | 159.4  | (141.3 to 190.5)   |
|            |        |        | 2013 | 92      | (79 to 108)          | 117.4  | (101.2 to 136.8)   |
|            | DALYs  | Male   | 1990 | 889     | (753 to 1,051)       | 4063.9 | (3435.9 to 4769.5) |

|              |         |        | 2013 | 910    | (740 to 1,103)       | 2397.7 | (1975.3 to 2878.6)   |
|--------------|---------|--------|------|--------|----------------------|--------|----------------------|
|              |         | Female | 1990 | 590    | (501 to 767)         | 2071.6 | (1766.7 to 2690.7)   |
|              |         |        | 2013 | 697    | (536 to 870)         | 1487.8 | (1144.3 to 1859.2)   |
|              |         | Both   | 1990 | 1,480  | (1,315 to 1,731)     | 2975.3 | (2645.0 to 3470.9)   |
|              |         |        | 2013 | 1,608  | (1,392 to 1,857)     | 1918.6 | (1665.6 to 2222.5)   |
|              | YLDs    | Male   | 1990 | 12     | (8 to 17)            | 61.6   | (41.4 to 83.6)       |
|              |         |        | 2013 | 21     | (14 to 30)           | 61.3   | (42.0 to 84.2)       |
|              |         | Female | 1990 | 12     | (8 to 16)            | 43.7   | (29.6 to 59.5)       |
|              |         |        | 2013 | 20     | (13 to 27)           | 45     | (29.6 to 60.6)       |
| Country      | measure | sex    | year | number | Uncertainty Interval | Rate   | Uncertainty Interval |
|              |         | Both   | 1990 | 25     | (17 to 33)           | 51.4   | (35.4 to 69.6)       |
|              |         |        | 2013 | 42     | (29 to 55)           | 52.1   | (36.6 to 69.0)       |
| Sierra Leone | Deaths  | Male   | 1990 | 1,058  | (837 to 1,350)       | 151    | (121.7 to 189.6)     |
|              |         |        | 2013 | 1,590  | (1,228 to 2,046)     | 187.5  | (147.9 to 233.6)     |
|              |         | Female | 1990 | 835    | (638 to 1,056)       | 134.1  | (104.4 to 172.3)     |
|              |         |        | 2013 | 1,320  | (965 to 1,790)       | 166    | (124.2 to 220.9)     |
|              |         | Both   | 1990 | 1,893  | (1,599 to 2,265)     | 142.4  | (121.4 to 169.8)     |
|              |         |        | 2013 | 2,910  | (2,386 to 3,538)     | 176.2  | (145.8 to 210.4)     |
|              | DALYs   | Male   | 1990 | 32,561 | (25,585 to 40,965)   | 2989.6 | (2387.6 to 3801.9)   |
|              |         |        | 2013 | 44,060 | (33,332 to 57,307)   | 3473.1 | (2693.4 to 4429.5)   |
|              |         | Female | 1990 | 24,444 | (17,441 to 31,183)   | 2374.7 | (1840.4 to 3005.0)   |
|              |         |        | 2013 | 34,078 | (24,701 to 46,595)   | 2767.1 | (2057.3 to 3732.3)   |
|              |         | Both   | 1990 | 57,006 | (47,232 to 68,515)   | 2679.9 | (2263.8 to 3199.8)   |
|              |         |        | 2013 | 78,139 | (62,886 to 95,432)   | 3107.2 | (2554.2 to 3759.4)   |
|              | YLDs    | Male   | 1990 | 191    | (119 to 271)         | 19.6   | (12.2 to 27.6)       |
|              |         |        | 2013 | 265    | (171 to 374)         | 19.5   | (12.6 to 27.3)       |
|              |         | Female | 1990 | 146    | (97 to 212)          | 14.8   | (9.7 to 21.3)        |
|              |         |        | 2013 | 203    | (129 to 291)         | 13.8   | (8.7 to 19.9)        |

|           |         |        |      |        |                      |        |                      |
|-----------|---------|--------|------|--------|----------------------|--------|----------------------|
|           |         | Both   | 1990 | 338    | (228 to 468)         | 17.2   | (11.6 to 23.9)       |
|           |         |        | 2013 | 469    | (312 to 644)         | 16.6   | (11.0 to 22.8)       |
| Singapore | Deaths  | Male   | 1990 | 725    | (612 to 862)         | 98.5   | (82.5 to 117.1)      |
|           |         |        | 2013 | 1,044  | (839 to 1,288)       | 52.9   | (42.6 to 65.4)       |
|           |         | Female | 1990 | 955    | (736 to 1,073)       | 105.3  | (80.5 to 118.6)      |
|           |         |        | 2013 | 1,449  | (1,040 to 2,021)     | 50.1   | (36.2 to 70.0)       |
|           |         | Both   | 1990 | 1,680  | (1,442 to 1,842)     | 103.3  | (87.6 to 113.3)      |
|           |         |        | 2013 | 2,493  | (2,025 to 3,132)     | 51.9   | (42.3 to 64.9)       |
|           | DALYs   | Male   | 1990 | 15,742 | (13,387 to 18,485)   | 1755.2 | (1495.8 to 2061.6)   |
|           |         |        | 2013 | 17,780 | (14,771 to 21,385)   | 839.2  | (697.1 to 1012.3)    |
|           |         | Female | 1990 | 15,875 | (12,432 to 17,528)   | 1610.1 | (1262.3 to 1780.0)   |
|           |         |        | 2013 | 16,132 | (12,590 to 22,343)   | 618.2  | (485.3 to 852.0)     |
|           |         | Both   | 1990 | 31,618 | (27,549 to 34,676)   | 1687.7 | (1463.2 to 1844.5)   |
|           |         |        | 2013 | 33,913 | (28,984 to 41,063)   | 724.9  | (617.3 to 878.2)     |
|           | YLDs    | Male   | 1990 | 1,130  | (758 to 1,570)       | 130.1  | (86.9 to 179.8)      |
|           |         |        | 2013 | 2,603  | (1,771 to 3,531)     | 122.7  | (83.9 to 165.7)      |
|           |         | Female | 1990 | 790    | (501 to 1,136)       | 78.3   | (49.8 to 113.2)      |
|           |         |        | 2013 | 1,963  | (1,253 to 2,805)     | 77.4   | (49.1 to 110.7)      |
|           |         | Both   | 1990 | 1,921  | (1,308 to 2,545)     | 101.7  | (69.3 to 135.3)      |
|           |         |        | 2013 | 4,566  | (3,094 to 6,198)     | 98.2   | (66.8 to 133.9)      |
| Slovakia  | Deaths  | Male   | 1990 | 3,923  | (3,383 to 4,553)     | 200.5  | (172.1 to 232.7)     |
|           |         |        | 2013 | 3,217  | (2,718 to 3,881)     | 124.1  | (104.5 to 149.6)     |
|           |         | Female | 1990 | 4,528  | (3,592 to 5,046)     | 146.5  | (116.8 to 163.4)     |
|           |         |        | 2013 | 3,939  | (3,366 to 4,963)     | 82.2   | (70.6 to 103.1)      |
|           |         |        |      |        |                      |        | Uncertainty Interval |
| Country   | measure | sex    | year | number | Uncertainty Interval | Rate   | Interval             |
|           |         | Both   | 1990 | 8,452  | (7,399 to 9,274)     | 168.6  | (147.5 to 185.3)     |
|           |         |        | 2013 | 7,157  | (6,368 to 8,344)     | 98.4   | (87.6 to 114.6)      |
|           | DALYs   | Male   | 1990 | 68,183 | (58,510 to 80,176)   | 3155.9 | (2715.4 to 3681.8)   |

|          |        |        |      |         |                      |        |                    |
|----------|--------|--------|------|---------|----------------------|--------|--------------------|
|          |        |        | 2013 | 52,554  | (44,034 to 62,866)   | 1822   | (1533.2 to 2183.4) |
|          |        | Female | 1990 | 62,038  | (49,703 to 68,252)   | 2023.7 | (1620.1 to 2228.1) |
|          |        |        | 2013 | 45,685  | (39,523 to 55,939)   | 1024.7 | (883.1 to 1250.7)  |
|          |        | Both   | 1990 | 130,222 | (116,301 to 143,090) | 2509   | (2239.5 to 2749.2) |
|          |        |        | 2013 | 98,239  | (87,289 to 112,156)  | 1357.6 | (1204.8 to 1547.6) |
|          | YLDs   | Male   | 1990 | 670     | (449 to 942)         | 28.8   | (19.3 to 40.5)     |
|          |        |        | 2013 | 961     | (636 to 1,323)       | 30.4   | (20.2 to 42.0)     |
|          |        | Female | 1990 | 569     | (381 to 803)         | 19.2   | (12.9 to 26.7)     |
|          |        |        | 2013 | 744     | (479 to 1,053)       | 18.5   | (12.1 to 26.2)     |
|          |        | Both   | 1990 | 1,240   | (840 to 1,695)       | 23.4   | (15.9 to 31.9)     |
|          |        |        | 2013 | 1,705   | (1,166 to 2,306)     | 23.8   | (16.3 to 32.1)     |
| Slovenia | Deaths | Male   | 1990 | 1,196   | (1,017 to 1,393)     | 159.1  | (135.3 to 186.4)   |
|          |        |        | 2013 | 1,029   | (811 to 1,233)       | 73.9   | (58.2 to 88.7)     |
|          |        | Female | 1990 | 1,678   | (1,346 to 1,843)     | 119.5  | (96.1 to 131.1)    |
|          |        |        | 2013 | 1,512   | (1,228 to 1,869)     | 57.1   | (46.8 to 70.7)     |
|          |        | Both   | 1990 | 2,874   | (2,580 to 3,141)     | 134.6  | (120.5 to 146.7)   |
|          |        |        | 2013 | 2,541   | (2,164 to 2,906)     | 64.4   | (54.7 to 73.4)     |
|          | DALYs  | Male   | 1990 | 20,710  | (17,841 to 24,114)   | 2450.7 | (2106.6 to 2841.4) |
|          |        |        | 2013 | 14,191  | (11,468 to 16,941)   | 985.7  | (796.1 to 1178.9)  |
|          |        | Female | 1990 | 21,686  | (17,345 to 23,677)   | 1604.9 | (1282.6 to 1753.8) |
|          |        |        | 2013 | 13,869  | (11,465 to 17,018)   | 623.5  | (516.1 to 765.5)   |
|          |        | Both   | 1990 | 42,396  | (38,252 to 46,205)   | 1946.5 | (1754.4 to 2119.5) |
|          |        |        | 2013 | 28,060  | (24,048 to 31,900)   | 784.2  | (669.9 to 891.4)   |
|          | YLDs   | Male   | 1990 | 277     | (177 to 385)         | 29.1   | (18.7 to 41.3)     |
|          |        |        | 2013 | 421     | (265 to 628)         | 29.4   | (18.6 to 43.6)     |
|          |        | Female | 1990 | 257     | (169 to 364)         | 20.1   | (13.3 to 28.6)     |
|          |        |        | 2013 | 316     | (207 to 450)         | 18.4   | (12.0 to 26.0)     |
|          |        | Both   | 1990 | 534     | (359 to 730)         | 24     | (16.2 to 32.8)     |

|                 |         |        | 2013 | 738    | (498 to 1,004)       | 23.6   | (15.9 to 32.1)       |
|-----------------|---------|--------|------|--------|----------------------|--------|----------------------|
| Solomon Islands | Deaths  | Male   | 1990 | 120    | (76 to 169)          | 212    | (138.1 to 283.8)     |
|                 |         |        | 2013 | 244    | (163 to 354)         | 217.4  | (153.6 to 298.5)     |
|                 |         | Female | 1990 | 66     | (41 to 99)           | 142.1  | (93.7 to 210.9)      |
|                 |         |        | 2013 | 175    | (106 to 261)         | 171.4  | (108.6 to 243.3)     |
|                 |         | Both   | 1990 | 187    | (125 to 260)         | 179.9  | (127.1 to 239.2)     |
|                 |         |        | 2013 | 419    | (275 to 606)         | 194.7  | (136.4 to 265.7)     |
|                 | DALYs   | Male   | 1990 | 3,371  | (2,072 to 4,958)     | 4584.8 | (2869.2 to 6518.7)   |
|                 |         |        | 2013 | 6,702  | (4,180 to 10,159)    | 4574.4 | (3006.3 to 6695.3)   |
|                 |         | Female | 1990 | 1,798  | (1,111 to 2,768)     | 2855.1 | (1823.1 to 4291.6)   |
|                 |         |        | 2013 | 4,376  | (2,520 to 6,913)     | 3282.3 | (1987.1 to 4962.5)   |
| Country         | measure | sex    | year | number | Uncertainty Interval | Rate   | Uncertainty Interval |
|                 |         | Both   | 1990 | 5,170  | (3,352 to 7,580)     | 3766.1 | (2527.7 to 5268.7)   |
|                 |         |        | 2013 | 11,079 | (6,747 to 16,607)    | 3934.7 | (2549.8 to 5721.2)   |
|                 | YLDs    | Male   | 1990 | 35     | (23 to 49)           | 59.5   | (39.1 to 82.7)       |
|                 |         |        | 2013 | 66     | (45 to 89)           | 55.3   | (37.6 to 74.6)       |
|                 |         | Female | 1990 | 22     | (15 to 31)           | 44     | (28.6 to 61.3)       |
|                 |         |        | 2013 | 50     | (34 to 69)           | 43.6   | (29.4 to 60.4)       |
|                 |         | Both   | 1990 | 58     | (40 to 78)           | 52.4   | (35.8 to 71.0)       |
|                 |         |        | 2013 | 117    | (81 to 152)          | 49.6   | (34.6 to 65.2)       |
| Somalia         | Deaths  | Male   | 1990 | 1,556  | (956 to 2,513)       | 158    | (101.3 to 247.8)     |
|                 |         |        | 2013 | 1,968  | (1,242 to 2,999)     | 136.7  | (90.3 to 199.5)      |
|                 |         | Female | 1990 | 2,213  | (1,173 to 3,350)     | 200    | (111.3 to 295.0)     |
|                 |         |        | 2013 | 2,461  | (1,444 to 3,613)     | 152.8  | (93.2 to 215.3)      |
|                 |         | Both   | 1990 | 3,770  | (2,260 to 5,669)     | 181.6  | (114.2 to 265.2)     |
|                 |         |        | 2013 | 4,429  | (2,713 to 6,569)     | 145.9  | (94.0 to 208.3)      |
|                 | DALYs   | Male   | 1990 | 38,563 | (23,404 to 62,194)   | 2874.3 | (1754.7 to 4623.7)   |

|              |         |        |      |         |                      |        |                      |
|--------------|---------|--------|------|---------|----------------------|--------|----------------------|
|              |         |        | 2013 | 46,076  | (27,849 to 72,197)   | 2442.9 | (1530.2 to 3747.2)   |
|              |         | Female | 1990 | 48,700  | (24,976 to 75,877)   | 3459.5 | (1814.6 to 5286.6)   |
|              |         |        | 2013 | 50,766  | (28,454 to 76,263)   | 2548.2 | (1475.5 to 3779.4)   |
|              |         | Both   | 1990 | 87,263  | (50,461 to 132,314)  | 3197.7 | (1901.8 to 4829.7)   |
|              |         |        | 2013 | 96,843  | (56,992 to 146,783)  | 2507.3 | (1509.0 to 3766.9)   |
|              | YLDs    | Male   | 1990 | 204     | (129 to 291)         | 13.4   | (8.6 to 18.8)        |
|              |         |        | 2013 | 308     | (196 to 452)         | 13.3   | (8.6 to 19.6)        |
|              |         | Female | 1990 | 141     | (91 to 208)          | 8.6    | (5.5 to 12.5)        |
|              |         |        | 2013 | 242     | (155 to 351)         | 9.8    | (6.2 to 14.2)        |
|              |         | Both   | 1990 | 346     | (235 to 472)         | 10.9   | (7.3 to 14.9)        |
|              |         |        | 2013 | 551     | (366 to 785)         | 11.5   | (7.6 to 16.0)        |
| South Africa | Deaths  | Male   | 1990 | 8,931   | (7,177 to 11,099)    | 124.1  | (100.5 to 154.4)     |
|              |         |        | 2013 | 12,479  | (9,909 to 15,246)    | 105.6  | (83.6 to 128.5)      |
|              |         | Female | 1990 | 12,428  | (9,939 to 14,626)    | 128.5  | (105.6 to 151.1)     |
|              |         |        | 2013 | 22,316  | (17,629 to 27,283)   | 108.5  | (85.8 to 132.4)      |
|              |         | Both   | 1990 | 21,359  | (18,395 to 24,277)   | 127.8  | (112.0 to 145.3)     |
|              |         |        | 2013 | 34,795  | (29,650 to 40,164)   | 109.2  | (93.1 to 125.7)      |
|              | DALYs   | Male   | 1990 | 214,340 | (170,665 to 266,137) | 2288   | (1840.6 to 2853.2)   |
|              |         |        | 2013 | 249,691 | (196,490 to 309,141) | 1747.2 | (1393.2 to 2130.9)   |
|              |         | Female | 1990 | 237,531 | (167,931 to 286,654) | 2152   | (1616.0 to 2553.2)   |
|              |         |        | 2013 | 314,725 | (249,185 to 397,534) | 1525.8 | (1204.6 to 1917.8)   |
|              |         | Both   | 1990 | 451,871 | (367,441 to 525,154) | 2220.4 | (1886.2 to 2545.7)   |
|              |         |        | 2013 | 564,416 | (480,913 to 660,243) | 1635.9 | (1393.1 to 1898.9)   |
|              | YLDs    | Male   | 1990 | 2,314   | (1,530 to 3,205)     | 23.3   | (15.2 to 32.2)       |
|              |         |        | 2013 | 4,188   | (2,763 to 5,872)     | 25.4   | (16.8 to 35.7)       |
|              |         | Female | 1990 | 2,609   | (1,765 to 3,658)     | 22.6   | (15.1 to 31.8)       |
|              |         |        | 2013 | 4,848   | (3,140 to 6,794)     | 21.9   | (14.2 to 31.1)       |
| Country      | measure | sex    | year | number  | Uncertainty Interval | Rate   | Uncertainty Interval |

|             |        |        |      |           |                        |        |                    |
|-------------|--------|--------|------|-----------|------------------------|--------|--------------------|
|             |        | Both   | 1990 | 4,924     | (3,427 to 6,648)       | 23     | (16.0 to 31.1)     |
|             |        |        | 2013 | 9,036     | (6,138 to 12,115)      | 23.3   | (15.8 to 31.4)     |
| South Korea | Deaths | Male   | 1990 | 22,828    | (20,721 to 26,464)     | 281.2  | (254.5 to 326.9)   |
|             |        |        | 2013 | 21,552    | (18,827 to 24,329)     | 97.7   | (85.2 to 111.2)    |
|             |        | Female | 1990 | 26,217    | (20,484 to 28,110)     | 205.6  | (161.5 to 221.2)   |
|             |        |        | 2013 | 28,810    | (24,346 to 38,787)     | 77.6   | (65.6 to 104.7)    |
|             |        | Both   | 1990 | 49,045    | (43,749 to 52,142)     | 234.5  | (207.5 to 249.6)   |
|             |        |        | 2013 | 50,362    | (44,666 to 60,650)     | 86.6   | (76.8 to 104.6)    |
|             | DALYs  | Male   | 1990 | 541,164   | (488,230 to 631,627)   | 4849.6 | (4397.1 to 5616.6) |
|             |        |        | 2013 | 382,152   | (334,242 to 430,533)   | 1469.4 | (1295.2 to 1646.8) |
|             |        | Female | 1990 | 474,863   | (365,311 to 509,374)   | 3197.5 | (2490.6 to 3425.7) |
|             |        |        | 2013 | 328,467   | (279,389 to 448,025)   | 919.1  | (780.8 to 1257.5)  |
|             |        | Both   | 1990 | 1,016,028 | (904,856 to 1,089,070) | 3874.9 | (3448.4 to 4127.7) |
|             |        |        | 2013 | 710,619   | (634,794 to 832,550)   | 1166.5 | (1040.9 to 1368.9) |
|             | YLDs   | Male   | 1990 | 13,260    | (8,983 to 18,221)      | 122.8  | (81.1 to 169.5)    |
|             |        |        | 2013 | 39,332    | (26,924 to 53,591)     | 145.6  | (99.2 to 195.5)    |
|             |        | Female | 1990 | 11,996    | (8,115 to 16,206)      | 80     | (53.5 to 108.5)    |
|             |        |        | 2013 | 32,474    | (22,358 to 43,953)     | 93.1   | (64.3 to 126.5)    |
|             |        | Both   | 1990 | 25,256    | (17,473 to 33,983)     | 96.7   | (66.2 to 130.1)    |
|             |        |        | 2013 | 71,807    | (50,035 to 97,245)     | 116.2  | (80.9 to 157.0)    |
| South Sudan | Deaths | Male   | 1990 | 1,653     | (1,048 to 2,479)       | 194.5  | (128.3 to 282.3)   |
|             |        |        | 2013 | 3,347     | (2,460 to 4,334)       | 180.8  | (136.0 to 230.5)   |
|             |        | Female | 1990 | 1,318     | (814 to 1,983)         | 159.1  | (102.8 to 228.9)   |
|             |        |        | 2013 | 2,690     | (1,970 to 3,556)       | 138    | (101.3 to 180.7)   |
|             |        | Both   | 1990 | 2,971     | (2,046 to 4,030)       | 176.2  | (124.9 to 232.7)   |
|             |        |        | 2013 | 6,038     | (4,850 to 7,327)       | 158.3  | (127.2 to 191.0)   |
|             | DALYs  | Male   | 1990 | 43,771    | (27,787 to 65,971)     | 3637.7 | (2339.0 to 5424.7) |
|             |        |        | 2013 | 77,542    | (55,888 to 101,660)    | 3280.3 | (2398.4 to 4269.0) |

|         |         | Female | 1990 | 29,916  | (17,513 to 46,082)   | 2553.1 | (1576.2 to 3823.5)   |
|---------|---------|--------|------|---------|----------------------|--------|----------------------|
|         |         |        | 2013 | 52,271  | (38,569 to 70,374)   | 2158.6 | (1583.9 to 2879.8)   |
|         |         | Both   | 1990 | 73,688  | (50,280 to 100,704)  | 3076   | (2125.1 to 4156.8)   |
|         |         |        | 2013 | 129,813 | (103,363 to 159,077) | 2695   | (2162.0 to 3286.2)   |
|         | YLDs    | Male   | 1990 | 171     | (110 to 259)         | 12.2   | (8.0 to 18.0)        |
|         |         |        | 2013 | 366     | (227 to 533)         | 12.9   | (8.1 to 18.4)        |
|         |         | Female | 1990 | 127     | (80 to 184)          | 8.8    | (5.5 to 12.7)        |
|         |         |        | 2013 | 277     | (182 to 396)         | 9.2    | (6.1 to 13.1)        |
|         |         | Both   | 1990 | 298     | (202 to 423)         | 10.4   | (7.1 to 14.6)        |
|         |         |        | 2013 | 643     | (437 to 894)         | 11     | (7.5 to 15.1)        |
| Spain   | Deaths  | Male   | 1990 | 18,162  | (15,516 to 21,244)   | 91.6   | (78.1 to 107.3)      |
|         |         |        | 2013 | 17,321  | (13,802 to 20,699)   | 44.9   | (36.0 to 53.4)       |
|         |         | Female | 1990 | 27,640  | (21,267 to 30,563)   | 84.4   | (65.3 to 93.0)       |
|         |         |        | 2013 | 25,537  | (20,770 to 35,745)   | 40.2   | (33.3 to 56.2)       |
| Country | measure | sex    | year | number  | Uncertainty Interval | Rate   | Uncertainty Interval |
|         |         | Both   | 1990 | 45,802  | (39,238 to 50,406)   | 88.3   | (75.7 to 97.2)       |
|         |         |        | 2013 | 42,858  | (36,881 to 53,318)   | 42.6   | (36.9 to 52.2)       |
|         | DALYs   | Male   | 1990 | 292,780 | (253,246 to 338,878) | 1419.4 | (1226.5 to 1644.5)   |
|         |         |        | 2013 | 235,673 | (194,947 to 275,426) | 678.4  | (562.8 to 793.6)     |
|         |         | Female | 1990 | 322,028 | (259,399 to 353,051) | 1086.5 | (877.4 to 1198.9)    |
|         |         |        | 2013 | 242,326 | (203,483 to 326,878) | 487.7  | (414.2 to 655.8)     |
|         |         | Both   | 1990 | 614,809 | (547,639 to 672,636) | 1241.3 | (1106.6 to 1356.8)   |
|         |         |        | 2013 | 478,000 | (421,838 to 564,425) | 576.5  | (510.2 to 674.3)     |
|         | YLDs    | Male   | 1990 | 20,483  | (14,096 to 27,678)   | 96.3   | (66.6 to 129.6)      |
|         |         |        | 2013 | 34,234  | (23,520 to 47,340)   | 102    | (70.0 to 141.3)      |
|         |         | Female | 1990 | 24,519  | (17,039 to 32,545)   | 85.2   | (58.6 to 114.1)      |
|         |         |        | 2013 | 31,576  | (21,442 to 43,660)   | 74.9   | (51.2 to 102.4)      |
|         |         | Both   | 1990 | 45,003  | (31,516 to 58,446)   | 90.3   | (63.4 to 117.5)      |



|           |        |        |      |         |                      |        |                    |
|-----------|--------|--------|------|---------|----------------------|--------|--------------------|
|           |        |        | 2013 | 65,810  | (46,510 to 88,269)   | 87.1   | (60.9 to 117.6)    |
| Sri Lanka | Deaths | Male   | 1990 | 3,873   | (3,244 to 4,796)     | 78.1   | (64.6 to 97.2)     |
|           |        |        | 2013 | 6,251   | (4,806 to 7,979)     | 79.7   | (60.9 to 101.7)    |
|           |        | Female | 1990 | 2,636   | (2,157 to 3,312)     | 57.7   | (46.5 to 73.0)     |
|           |        |        | 2013 | 6,086   | (2,986 to 8,082)     | 67.7   | (32.0 to 90.4)     |
|           |        | Both   | 1990 | 6,510   | (5,777 to 7,767)     | 68     | (60.1 to 81.2)     |
|           |        |        | 2013 | 12,338  | (8,658 to 15,122)    | 73.4   | (50.4 to 90.3)     |
|           | DALYs  | Male   | 1990 | 97,673  | (82,889 to 117,366)  | 1599.5 | (1357.7 to 1930.1) |
|           |        |        | 2013 | 126,673 | (97,633 to 161,250)  | 1393.8 | (1084.2 to 1767.9) |
|           |        | Female | 1990 | 58,988  | (48,784 to 71,736)   | 1001.5 | (837.7 to 1235.7)  |
|           |        |        | 2013 | 92,927  | (53,402 to 121,384)  | 918.4  | (514.3 to 1200.0)  |
|           |        | Both   | 1990 | 156,661 | (140,791 to 183,293) | 1301.9 | (1168.5 to 1530.5) |
|           |        |        | 2013 | 219,600 | (166,891 to 263,232) | 1141.1 | (851.8 to 1365.9)  |
|           | YLDs   | Male   | 1990 | 3,236   | (2,181 to 4,441)     | 60.8   | (41.0 to 83.1)     |
|           |        |        | 2013 | 5,437   | (3,645 to 7,391)     | 60.9   | (40.5 to 82.9)     |
|           |        | Female | 1990 | 2,538   | (1,720 to 3,525)     | 48.6   | (32.6 to 67.8)     |
|           |        |        | 2013 | 5,219   | (3,434 to 7,104)     | 50.2   | (32.8 to 68.5)     |
|           |        | Both   | 1990 | 5,774   | (4,017 to 7,660)     | 54.8   | (38.3 to 72.5)     |
|           |        |        | 2013 | 10,657  | (7,237 to 14,238)    | 55.1   | (37.7 to 73.5)     |
| Sudan     | Deaths | Male   | 1990 | 5,511   | (4,159 to 6,875)     | 176.3  | (135.2 to 215.9)   |
|           |        |        | 2013 | 9,270   | (6,789 to 11,884)    | 154.1  | (114.3 to 191.9)   |
|           |        | Female | 1990 | 6,707   | (4,718 to 8,834)     | 191.7  | (142.8 to 250.4)   |
|           |        |        | 2013 | 10,170  | (7,155 to 13,767)    | 155    | (110.1 to 205.8)   |
|           |        | Both   | 1990 | 12,218  | (9,783 to 14,545)    | 184.6  | (152.8 to 219.1)   |
|           |        |        | 2013 | 19,440  | (15,416 to 23,965)   | 154.7  | (124.5 to 186.5)   |
|           | DALYs  | Male   | 1990 | 166,318 | (119,494 to 216,939) | 3266.7 | (2456.6 to 4111.6) |
|           |        |        | 2013 | 232,696 | (166,829 to 308,945) | 2613.2 | (1907.0 to 3372.8) |
|           |        | Female | 1990 | 194,017 | (107,678 to 261,198) | 3567.8 | (2477.5 to 4725.1) |

|          |         |        | 2013 | 229,045 | (154,363 to 320,673) | 2500.3 | (1730.7 to 3440.0)   |
|----------|---------|--------|------|---------|----------------------|--------|----------------------|
| Country  | measure | sex    | year | number  | Uncertainty Interval | Rate   | Uncertainty Interval |
|          |         | Both   | 1990 | 360,336 | (260,778 to 440,493) | 3422.3 | (2745.8 to 4095.1)   |
|          |         |        | 2013 | 461,741 | (362,590 to 578,955) | 2556.5 | (2015.4 to 3173.0)   |
|          | YLDs    | Male   | 1990 | 468     | (313 to 671)         | 10.8   | (7.0 to 15.5)        |
|          |         |        | 2013 | 1,001   | (639 to 1,399)       | 11.1   | (7.0 to 15.6)        |
|          |         | Female | 1990 | 410     | (265 to 585)         | 9.1    | (5.9 to 13.0)        |
|          |         |        | 2013 | 808     | (516 to 1,172)       | 8.5    | (5.5 to 12.3)        |
|          |         | Both   | 1990 | 879     | (591 to 1,204)       | 9.9    | (6.7 to 13.8)        |
|          |         |        | 2013 | 1,810   | (1,187 to 2,489)     | 9.7    | (6.4 to 13.3)        |
| Suriname | Deaths  | Male   | 1990 | 138     | (118 to 167)         | 144.4  | (123.9 to 175.4)     |
|          |         |        | 2013 | 254     | (184 to 330)         | 155.2  | (114.2 to 200.4)     |
|          |         | Female | 1990 | 151     | (133 to 192)         | 138.1  | (121.4 to 176.1)     |
|          |         |        | 2013 | 302     | (217 to 387)         | 145.3  | (104.3 to 185.3)     |
|          |         | Both   | 1990 | 290     | (262 to 346)         | 141.7  | (128.0 to 169.3)     |
|          |         |        | 2013 | 556     | (443 to 674)         | 151.2  | (121.6 to 181.6)     |
|          | DALYs   | Male   | 1990 | 3,282   | (2,822 to 3,916)     | 2762.1 | (2375.4 to 3337.2)   |
|          |         |        | 2013 | 5,576   | (3,973 to 7,367)     | 2847.8 | (2059.6 to 3713.6)   |
|          |         | Female | 1990 | 3,069   | (2,713 to 3,747)     | 2413.2 | (2132.9 to 2981.7)   |
|          |         |        | 2013 | 5,116   | (3,693 to 6,717)     | 2289   | (1648.2 to 2986.9)   |
|          |         | Both   | 1990 | 6,352   | (5,771 to 7,373)     | 2584.9 | (2344.8 to 3047.1)   |
|          |         |        | 2013 | 10,693  | (8,457 to 13,182)    | 2562   | (2037.7 to 3143.5)   |
|          | YLDs    | Male   | 1990 | 64      | (43 to 87)           | 61.2   | (40.8 to 83.9)       |
|          |         |        | 2013 | 112     | (76 to 156)          | 61.2   | (41.4 to 86.1)       |
|          |         | Female | 1990 | 50      | (33 to 69)           | 42.7   | (28.6 to 58.5)       |
|          |         |        | 2013 | 97      | (63 to 137)          | 43.6   | (28.2 to 62.4)       |
|          |         | Both   | 1990 | 114     | (79 to 153)          | 51.3   | (35.4 to 69.0)       |
|          |         |        | 2013 | 209     | (144 to 287)         | 51.4   | (35.3 to 70.6)       |

|           |         |        |      |        |                      |        |                      |
|-----------|---------|--------|------|--------|----------------------|--------|----------------------|
| Swaziland | Deaths  | Male   | 1990 | 137    | (100 to 174)         | 131.3  | (98.3 to 165.0)      |
|           |         |        | 2013 | 317    | (250 to 397)         | 159.4  | (128.2 to 198.7)     |
|           |         | Female | 1990 | 196    | (145 to 238)         | 149.6  | (112.1 to 179.5)     |
|           |         |        | 2013 | 373    | (276 to 507)         | 150.7  | (112.3 to 201.9)     |
|           |         | Both   | 1990 | 333    | (268 to 386)         | 143    | (115.0 to 165.4)     |
|           |         |        | 2013 | 691    | (568 to 845)         | 155.5  | (128.4 to 190.2)     |
|           | DALYs   | Male   | 1990 | 3,401  | (2,522 to 4,374)     | 2369.7 | (1746.6 to 3003.6)   |
|           |         |        | 2013 | 8,282  | (6,410 to 10,455)    | 3131.1 | (2454.2 to 3948.3)   |
|           |         | Female | 1990 | 4,217  | (3,066 to 5,158)     | 2461.4 | (1819.1 to 2980.1)   |
|           |         |        | 2013 | 8,307  | (6,173 to 11,542)    | 2564.9 | (1911.1 to 3510.7)   |
|           |         | Both   | 1990 | 7,619  | (6,002 to 8,917)     | 2432.8 | (1957.2 to 2817.8)   |
|           |         |        | 2013 | 16,589 | (13,608 to 20,582)   | 2819.6 | (2304.2 to 3447.6)   |
|           | YLDs    | Male   | 1990 | 38     | (25 to 53)           | 24.3   | (16.2 to 33.5)       |
|           |         |        | 2013 | 61     | (39 to 89)           | 22.4   | (14.1 to 32.9)       |
|           |         | Female | 1990 | 44     | (28 to 61)           | 22.2   | (14.8 to 30.7)       |
|           |         |        | 2013 | 74     | (48 to 103)          | 22.3   | (14.4 to 31.3)       |
|           |         |        |      |        |                      |        | Uncertainty Interval |
| Country   | measure | sex    | year | number | Uncertainty Interval | Rate   | Interval             |
|           |         | Both   | 1990 | 83     | (57 to 114)          | 23.1   | (15.9 to 31.5)       |
|           |         |        | 2013 | 135    | (91 to 188)          | 22.4   | (15.0 to 31.0)       |
| Sweden    | Deaths  | Male   | 1990 | 4,635  | (3,828 to 5,742)     | 76.8   | (63.4 to 95.4)       |
|           |         |        | 2013 | 3,996  | (2,981 to 4,946)     | 48.9   | (36.5 to 60.3)       |
|           |         | Female | 1990 | 6,264  | (5,094 to 7,520)     | 65.3   | (53.1 to 77.8)       |
|           |         |        | 2013 | 5,432  | (4,224 to 6,999)     | 43.5   | (34.2 to 56.1)       |
|           |         | Both   | 1990 | 10,899 | (9,701 to 12,501)    | 70.6   | (63.4 to 81.1)       |
|           |         |        | 2013 | 9,429  | (7,773 to 11,079)    | 46.3   | (38.5 to 54.1)       |
|           | DALYs   | Male   | 1990 | 69,923 | (59,842 to 84,853)   | 1186.3 | (1015.1 to 1440.0)   |
|           |         |        | 2013 | 52,794 | (40,984 to 62,880)   | 686.6  | (531.8 to 817.9)     |
|           |         | Female | 1990 | 70,701 | (59,601 to 83,177)   | 865.8  | (731.4 to 1014.5)    |

|             |        |        |      |         |                      |        |                   |
|-------------|--------|--------|------|---------|----------------------|--------|-------------------|
|             |        |        | 2013 | 50,822  | (41,103 to 64,087)   | 502.2  | (408.3 to 627.5)  |
|             |        | Both   | 1990 | 140,624 | (127,691 to 157,530) | 1011   | (917.5 to 1135.5) |
|             |        |        | 2013 | 103,616 | (88,353 to 118,810)  | 589.7  | (497.8 to 671.6)  |
|             | YLDs   | Male   | 1990 | 6,948   | (4,477 to 9,792)     | 117.9  | (76.3 to 165.3)   |
|             |        |        | 2013 | 7,942   | (5,144 to 11,053)    | 107    | (69.9 to 148.8)   |
|             |        | Female | 1990 | 5,954   | (3,905 to 8,378)     | 79.4   | (53.0 to 109.5)   |
|             |        |        | 2013 | 6,407   | (4,335 to 8,692)     | 74.5   | (51.1 to 100.9)   |
|             |        | Both   | 1990 | 12,903  | (8,717 to 17,649)    | 96.6   | (65.0 to 130.9)   |
|             |        |        | 2013 | 14,350  | (9,951 to 19,070)    | 90.1   | (62.5 to 120.5)   |
| Switzerland | Deaths | Male   | 1990 | 2,708   | (2,245 to 3,290)     | 72.3   | (59.8 to 87.7)    |
|             |        |        | 2013 | 2,654   | (1,949 to 3,239)     | 42.6   | (31.3 to 51.9)    |
|             |        | Female | 1990 | 4,269   | (3,406 to 4,849)     | 62.2   | (49.9 to 70.3)    |
|             |        |        | 2013 | 4,076   | (3,267 to 5,525)     | 38.9   | (31.3 to 52.6)    |
|             |        | Both   | 1990 | 6,977   | (6,072 to 7,817)     | 66.7   | (58.3 to 74.8)    |
|             |        |        | 2013 | 6,730   | (5,639 to 8,163)     | 40.8   | (34.3 to 49.2)    |
|             | DALYs  | Male   | 1990 | 39,644  | (33,588 to 48,124)   | 1040.3 | (880.5 to 1260.3) |
|             |        |        | 2013 | 33,868  | (25,786 to 40,115)   | 565.4  | (431.4 to 670.3)  |
|             |        | Female | 1990 | 45,057  | (37,138 to 50,472)   | 760.4  | (625.5 to 853.7)  |
|             |        |        | 2013 | 36,132  | (29,820 to 46,846)   | 420.1  | (349.7 to 540.6)  |
|             |        | Both   | 1990 | 84,702  | (75,755 to 94,383)   | 880.3  | (786.2 to 981.5)  |
|             |        |        | 2013 | 70,000  | (60,098 to 81,753)   | 487    | (416.8 to 562.9)  |
|             | YLDs   | Male   | 1990 | 3,946   | (2,609 to 5,529)     | 103    | (68.0 to 144.4)   |
|             |        |        | 2013 | 6,124   | (4,188 to 8,549)     | 105.4  | (72.1 to 146.5)   |
|             |        | Female | 1990 | 4,040   | (2,702 to 5,595)     | 76     | (51.7 to 104.0)   |
|             |        |        | 2013 | 5,484   | (3,661 to 7,621)     | 75.8   | (51.1 to 104.5)   |
|             |        | Both   | 1990 | 7,986   | (5,423 to 10,587)    | 87.5   | (59.7 to 115.3)   |
|             |        |        | 2013 | 11,608  | (8,060 to 15,487)    | 89.7   | (62.8 to 118.9)   |
| Syria       | Deaths | Male   | 1990 | 5,314   | (4,122 to 6,735)     | 229.4  | (177.8 to 293.9)  |

|         |         |        | 2013 | 7,345   | (5,393 to 9,518)     | 159.7  | (116.7 to 204.1)     |
|---------|---------|--------|------|---------|----------------------|--------|----------------------|
|         |         | Female | 1990 | 3,647   | (2,689 to 5,502)     | 169.3  | (123.8 to 258.8)     |
|         |         |        | 2013 | 5,837   | (4,238 to 7,518)     | 130.9  | (95.7 to 167.6)      |
| Country | measure | sex    | year | number  | Uncertainty Interval | Rate   | Uncertainty Interval |
|         |         | Both   | 1990 | 8,962   | (7,305 to 11,444)    | 199    | (162.2 to 258.8)     |
|         |         |        | 2013 | 13,182  | (10,692 to 15,776)   | 145.2  | (117.0 to 172.7)     |
|         | DALYs   | Male   | 1990 | 186,675 | (144,005 to 239,811) | 5025.3 | (3842.7 to 6431.8)   |
|         |         |        | 2013 | 173,258 | (128,176 to 231,326) | 2795.2 | (2053.3 to 3652.3)   |
|         |         | Female | 1990 | 112,305 | (81,382 to 161,738)  | 3256.1 | (2364.6 to 4961.8)   |
|         |         |        | 2013 | 112,903 | (82,367 to 146,597)  | 1937.5 | (1413.4 to 2525.3)   |
|         |         | Both   | 1990 | 298,980 | (238,581 to 376,190) | 4144.4 | (3346.9 to 5362.7)   |
|         |         |        | 2013 | 286,162 | (231,833 to 348,119) | 2364.6 | (1899.7 to 2843.9)   |
|         | YLDs    | Male   | 1990 | 276     | (186 to 392)         | 10.4   | (7.0 to 14.9)        |
|         |         |        | 2013 | 695     | (459 to 969)         | 10.9   | (7.3 to 15.1)        |
|         |         | Female | 1990 | 229     | (155 to 329)         | 8.7    | (5.9 to 12.6)        |
|         |         |        | 2013 | 552     | (359 to 780)         | 8.7    | (5.7 to 12.1)        |
|         |         | Both   | 1990 | 505     | (348 to 687)         | 9.6    | (6.7 to 13.0)        |
|         |         |        | 2013 | 1,248   | (848 to 1,664)       | 9.8    | (6.7 to 13.0)        |
| Taiwan  | Deaths  | Male   | 1990 | 6,983   | (5,811 to 8,097)     | 115.8  | (96.8 to 134.1)      |
|         |         |        | 2013 | 8,157   | (6,949 to 9,764)     | 56.6   | (48.4 to 67.5)       |
|         |         | Female | 1990 | 5,035   | (3,624 to 6,033)     | 94.8   | (67.6 to 114.7)      |
|         |         |        | 2013 | 6,043   | (4,992 to 7,679)     | 38.9   | (32.2 to 49.3)       |
|         |         | Both   | 1990 | 12,018  | (10,284 to 13,542)   | 106.4  | (89.7 to 120.8)      |
|         |         |        | 2013 | 14,201  | (12,674 to 16,471)   | 47.3   | (42.3 to 54.8)       |
|         | DALYs   | Male   | 1990 | 161,675 | (134,538 to 187,188) | 2142.9 | (1800.5 to 2467.2)   |
|         |         |        | 2013 | 151,424 | (132,200 to 176,352) | 1065.9 | (932.5 to 1235.3)    |
|         |         | Female | 1990 | 94,822  | (69,419 to 112,816)  | 1483.1 | (1085.1 to 1773.5)   |
|         |         |        | 2013 | 85,127  | (73,331 to 105,378)  | 564.4  | (489.2 to 702.1)     |

|            |         |        |      |         |                      |        |                      |
|------------|---------|--------|------|---------|----------------------|--------|----------------------|
|            |         | Both   | 1990 | 256,498 | (221,380 to 288,860) | 1834.9 | (1582.4 to 2054.7)   |
|            |         |        | 2013 | 236,552 | (214,892 to 267,771) | 806.1  | (732.0 to 912.2)     |
|            | YLDs    | Male   | 1990 | 7,672   | (5,295 to 10,244)    | 107.9  | (74.5 to 143.4)      |
|            |         |        | 2013 | 13,608  | (9,097 to 18,704)    | 97     | (65.2 to 133.7)      |
|            |         | Female | 1990 | 4,600   | (3,218 to 6,293)     | 71.4   | (49.8 to 97.4)       |
|            |         |        | 2013 | 9,576   | (6,652 to 12,963)    | 62.8   | (43.5 to 84.9)       |
|            |         | Both   | 1990 | 12,273  | (8,631 to 16,187)    | 90     | (63.7 to 118.1)      |
|            |         |        | 2013 | 23,185  | (16,099 to 31,100)   | 79.1   | (55.0 to 106.0)      |
| Tajikistan | Deaths  | Male   | 1990 | 1,900   | (1,628 to 2,177)     | 210.3  | (179.3 to 240.5)     |
|            |         |        | 2013 | 2,413   | (1,925 to 2,940)     | 179.5  | (144.2 to 217.2)     |
|            |         | Female | 1990 | 2,301   | (2,060 to 2,685)     | 180.6  | (162.0 to 211.1)     |
|            |         |        | 2013 | 2,759   | (2,144 to 3,357)     | 169.1  | (131.0 to 204.9)     |
|            |         | Both   | 1990 | 4,201   | (3,841 to 4,655)     | 192.4  | (175.5 to 213.2)     |
|            |         |        | 2013 | 5,173   | (4,344 to 5,924)     | 174.2  | (145.9 to 198.3)     |
|            | DALYs   | Male   | 1990 | 37,202  | (31,808 to 42,802)   | 3467.3 | (2974.9 to 3983.6)   |
|            |         |        | 2013 | 47,358  | (36,758 to 58,576)   | 2842.9 | (2227.1 to 3475.8)   |
|            |         | Female | 1990 | 40,277  | (35,917 to 47,395)   | 2912.8 | (2615.1 to 3408.1)   |
|            |         |        | 2013 | 48,850  | (37,630 to 60,198)   | 2568.1 | (1982.6 to 3172.0)   |
|            |         |        |      |         |                      |        | Uncertainty Interval |
| Country    | measure | sex    | year | number  | Uncertainty Interval | Rate   | Uncertainty Interval |
|            |         | Both   | 1990 | 77,479  | (70,684 to 86,311)   | 3136.9 | (2860.3 to 3484.1)   |
|            |         |        | 2013 | 96,208  | (80,643 to 111,930)  | 2697.9 | (2270.7 to 3118.8)   |
|            | YLDs    | Male   | 1990 | 221     | (140 to 315)         | 17     | (11.0 to 24.2)       |
|            |         |        | 2013 | 357     | (233 to 502)         | 16.3   | (10.6 to 23.0)       |
|            |         | Female | 1990 | 186     | (122 to 260)         | 12.6   | (8.3 to 17.6)        |
|            |         |        | 2013 | 288     | (184 to 405)         | 12.8   | (8.3 to 17.9)        |
|            |         | Both   | 1990 | 408     | (271 to 558)         | 14.7   | (9.9 to 19.9)        |
|            |         |        | 2013 | 645     | (452 to 872)         | 14.5   | (10.2 to 19.4)       |
| Tanzania   | Deaths  | Male   | 1990 | 2,434   | (1,722 to 3,079)     | 78.5   | (54.1 to 99.4)       |

|          |        |        |      |         |                      |        |                    |
|----------|--------|--------|------|---------|----------------------|--------|--------------------|
|          |        |        | 2013 | 5,481   | (4,023 to 7,009)     | 83.2   | (60.6 to 105.8)    |
|          |        | Female | 1990 | 2,670   | (1,855 to 3,351)     | 71.2   | (48.1 to 90.6)     |
|          |        |        | 2013 | 5,684   | (3,896 to 7,599)     | 69.5   | (46.8 to 93.5)     |
|          |        | Both   | 1990 | 5,105   | (4,003 to 6,073)     | 74.4   | (55.8 to 90.1)     |
|          |        |        | 2013 | 11,165  | (8,575 to 13,535)    | 75.5   | (57.7 to 92.1)     |
|          | DALYs  | Male   | 1990 | 58,491  | (42,834 to 73,711)   | 1291.4 | (916.6 to 1631.3)  |
|          |        |        | 2013 | 112,910 | (82,682 to 144,610)  | 1273.5 | (937.3 to 1626.0)  |
|          |        | Female | 1990 | 58,301  | (42,854 to 73,443)   | 1147.1 | (809.3 to 1433.1)  |
|          |        |        | 2013 | 111,327 | (78,291 to 147,209)  | 1074   | (748.5 to 1442.5)  |
|          |        | Both   | 1990 | 116,792 | (93,769 to 138,114)  | 1213.9 | (954.5 to 1437.6)  |
|          |        |        | 2013 | 224,237 | (175,698 to 271,617) | 1163.8 | (899.6 to 1405.4)  |
|          | YLDs   | Male   | 1990 | 929     | (582 to 1,363)       | 18     | (11.4 to 26.2)     |
|          |        |        | 2013 | 1,758   | (1,114 to 2,608)     | 15.5   | (9.4 to 23.2)      |
|          |        | Female | 1990 | 754     | (467 to 1,127)       | 13.2   | (8.1 to 19.1)      |
|          |        |        | 2013 | 1,376   | (868 to 2,016)       | 11.4   | (7.2 to 16.9)      |
|          |        | Both   | 1990 | 1,683   | (1,122 to 2,353)     | 15.4   | (10.3 to 21.8)     |
|          |        |        | 2013 | 3,135   | (2,097 to 4,438)     | 13.3   | (8.7 to 19.0)      |
| Thailand | Deaths | Male   | 1990 | 15,215  | (12,881 to 18,422)   | 125.9  | (107.9 to 147.4)   |
|          |        |        | 2013 | 28,581  | (22,746 to 36,721)   | 97.4   | (78.2 to 124.9)    |
|          |        | Female | 1990 | 17,907  | (13,498 to 19,780)   | 130.1  | (98.7 to 143.7)    |
|          |        |        | 2013 | 33,118  | (25,308 to 48,781)   | 91.7   | (69.8 to 135.3)    |
|          |        | Both   | 1990 | 33,123  | (28,971 to 36,552)   | 130.1  | (112.0 to 141.7)   |
|          |        |        | 2013 | 61,699  | (50,902 to 79,803)   | 95     | (78.1 to 124.2)    |
|          | DALYs  | Male   | 1990 | 383,905 | (317,175 to 493,591) | 2219.4 | (1874.6 to 2736.7) |
|          |        |        | 2013 | 550,386 | (430,064 to 698,724) | 1648.8 | (1296.4 to 2092.9) |
|          |        | Female | 1990 | 296,003 | (210,531 to 330,177) | 1744.3 | (1292.6 to 1926.9) |
|          |        |        | 2013 | 442,947 | (342,219 to 621,909) | 1166.4 | (900.9 to 1656.0)  |
|          |        | Both   | 1990 | 679,908 | (598,114 to 782,042) | 1985.6 | (1758.7 to 2215.6) |

|             |         |        | 2013 | 993,334 | (827,295 to 1,222,054) | 1400.3 | (1167.6 to 1740.5)   |
|-------------|---------|--------|------|---------|------------------------|--------|----------------------|
|             | YLDs    | Male   | 1990 | 8,827   | (6,110 to 11,953)      | 59.6   | (41.5 to 79.9)       |
|             |         |        | 2013 | 20,354  | (14,227 to 27,539)     | 62     | (43.3 to 83.8)       |
|             |         | Female | 1990 | 7,570   | (5,203 to 10,365)      | 44.5   | (30.5 to 61.2)       |
|             |         |        | 2013 | 17,432  | (11,648 to 24,368)     | 44.8   | (29.9 to 62.5)       |
| Country     | measure | sex    | year | number  | Uncertainty Interval   | Rate   | Uncertainty Interval |
|             |         | Both   | 1990 | 16,398  | (11,515 to 21,456)     | 51.4   | (36.0 to 67.0)       |
|             |         |        | 2013 | 37,786  | (26,595 to 50,001)     | 52.6   | (36.8 to 69.9)       |
| The Bahamas | Deaths  | Male   | 1990 | 75      | (62 to 90)             | 152.2  | (124.7 to 183.7)     |
|             |         |        | 2013 | 141     | (101 to 185)           | 116.2  | (84.9 to 148.9)      |
|             |         | Female | 1990 | 94      | (78 to 108)            | 143.9  | (119.5 to 165.8)     |
|             |         |        | 2013 | 180     | (127 to 233)           | 104.2  | (73.9 to 134.5)      |
|             |         | Both   | 1990 | 169     | (150 to 190)           | 148.4  | (130.5 to 166.4)     |
|             |         |        | 2013 | 322     | (256 to 384)           | 110.2  | (88.7 to 130.4)      |
|             | DALYs   | Male   | 1990 | 1,804   | (1,503 to 2,138)       | 2774.6 | (2324.0 to 3309.6)   |
|             |         |        | 2013 | 3,013   | (2,102 to 4,041)       | 2019   | (1439.0 to 2657.1)   |
|             |         | Female | 1990 | 1,802   | (1,506 to 2,067)       | 2337.1 | (1964.1 to 2678.0)   |
|             |         |        | 2013 | 2,930   | (2,033 to 3,932)       | 1585.7 | (1109.0 to 2103.1)   |
|             |         | Both   | 1990 | 3,607   | (3,238 to 4,029)       | 2541.5 | (2262.8 to 2844.4)   |
|             |         |        | 2013 | 5,943   | (4,699 to 7,229)       | 1787.2 | (1427.8 to 2157.4)   |
|             | YLDs    | Male   | 1990 | 36      | (24 to 50)             | 61.7   | (41.2 to 86.6)       |
|             |         |        | 2013 | 89      | (59 to 125)            | 63     | (41.4 to 88.5)       |
|             |         | Female | 1990 | 31      | (21 to 42)             | 42.6   | (28.9 to 58.9)       |
|             |         |        | 2013 | 79      | (52 to 117)            | 43.1   | (28.4 to 63.5)       |
|             |         | Both   | 1990 | 67      | (46 to 91)             | 50.8   | (34.7 to 68.9)       |
|             |         |        | 2013 | 169     | (119 to 227)           | 51.6   | (36.3 to 69.6)       |
| The Gambia  | Deaths  | Male   | 1990 | 161     | (105 to 257)           | 120.7  | (81.9 to 185.6)      |
|             |         |        | 2013 | 351     | (227 to 535)           | 151.2  | (105.2 to 216.7)     |



|             |         |        |      |        |                      |        |                      |
|-------------|---------|--------|------|--------|----------------------|--------|----------------------|
|             |         | Female | 1990 | 168    | (108 to 261)         | 145.4  | (99.6 to 214.9)      |
|             |         |        | 2013 | 358    | (228 to 551)         | 164.4  | (108.3 to 242.3)     |
|             |         | Both   | 1990 | 330    | (231 to 504)         | 132.6  | (96.0 to 195.9)      |
|             |         |        | 2013 | 709    | (464 to 1,048)       | 157.9  | (111.1 to 222.9)     |
|             | DALYs   | Male   | 1990 | 4,469  | (2,910 to 6,905)     | 2179.9 | (1422.2 to 3484.0)   |
|             |         |        | 2013 | 8,310  | (5,150 to 13,087)    | 2565.9 | (1661.6 to 3930.5)   |
|             |         | Female | 1990 | 4,278  | (2,646 to 6,545)     | 2480.8 | (1585.3 to 3876.2)   |
|             |         |        | 2013 | 7,970  | (4,737 to 12,570)    | 2636.9 | (1650.7 to 4061.9)   |
|             |         | Both   | 1990 | 8,747  | (5,996 to 13,015)    | 2322   | (1598.0 to 3578.0)   |
|             |         |        | 2013 | 16,281 | (9,995 to 25,144)    | 2601.5 | (1682.9 to 3863.1)   |
|             | YLDs    | Male   | 1990 | 39     | (26 to 54)           | 19.9   | (13.2 to 27.7)       |
|             |         |        | 2013 | 73     | (48 to 100)          | 19.6   | (13.0 to 27.2)       |
|             |         | Female | 1990 | 25     | (17 to 37)           | 14.8   | (9.9 to 21.6)        |
|             |         |        | 2013 | 57     | (38 to 81)           | 15.1   | (10.1 to 21.6)       |
|             |         | Both   | 1990 | 65     | (44 to 89)           | 17.5   | (11.8 to 24.3)       |
|             |         |        | 2013 | 130    | (90 to 176)          | 17.4   | (12.1 to 23.4)       |
| Timor-Leste | Deaths  | Male   | 1990 | 140    | (102 to 182)         | 135.3  | (100.4 to 172.6)     |
|             |         |        | 2013 | 235    | (172 to 306)         | 143.3  | (104.7 to 183.4)     |
|             |         | Female | 1990 | 130    | (92 to 185)          | 143.5  | (102.3 to 200.9)     |
|             |         |        | 2013 | 247    | (167 to 355)         | 141.2  | (95.5 to 198.9)      |
|             |         |        |      |        |                      |        | Uncertainty Interval |
| Country     | measure | sex    | year | number | Uncertainty Interval | Rate   | Interval             |
|             |         | Both   | 1990 | 270    | (212 to 346)         | 139.2  | (110.2 to 176.2)     |
|             |         |        | 2013 | 483    | (383 to 617)         | 142.7  | (111.8 to 179.7)     |
|             | DALYs   | Male   | 1990 | 4,890  | (3,547 to 6,523)     | 2608.3 | (1927.4 to 3367.6)   |
|             |         |        | 2013 | 6,034  | (4,458 to 7,889)     | 2473.9 | (1813.3 to 3200.3)   |
|             |         | Female | 1990 | 4,263  | (2,641 to 6,152)     | 2639.8 | (1913.9 to 3734.1)   |
|             |         |        | 2013 | 5,264  | (3,608 to 7,766)     | 2209.7 | (1530.9 to 3178.0)   |
|             |         | Both   | 1990 | 9,153  | (6,843 to 11,843)    | 2621.4 | (2086.2 to 3327.8)   |

|       |        |        |      |        |                    |        |                    |
|-------|--------|--------|------|--------|--------------------|--------|--------------------|
|       |        |        | 2013 | 11,299 | (8,902 to 14,565)  | 2344.6 | (1856.8 to 2989.4) |
|       | YLDs   | Male   | 1990 | 72     | (48 to 97)         | 59.1   | (40.4 to 79.5)     |
|       |        |        | 2013 | 127    | (84 to 176)        | 59.9   | (40.8 to 82.4)     |
|       |        | Female | 1990 | 52     | (33 to 72)         | 45.1   | (30.0 to 62.3)     |
|       |        |        | 2013 | 110    | (73 to 153)        | 48.7   | (32.7 to 67.6)     |
|       |        | Both   | 1990 | 124    | (84 to 164)        | 52.3   | (36.6 to 69.6)     |
|       |        |        | 2013 | 238    | (161 to 322)       | 54     | (36.9 to 73.3)     |
| Togo  | Deaths | Male   | 1990 | 715    | (580 to 872)       | 131.5  | (107.0 to 160.2)   |
|       |        |        | 2013 | 1,312  | (1,017 to 1,650)   | 152.2  | (121.3 to 187.2)   |
|       |        | Female | 1990 | 911    | (724 to 1,172)     | 147.5  | (117.6 to 193.3)   |
|       |        |        | 2013 | 1,223  | (968 to 1,610)     | 128.8  | (102.2 to 168.4)   |
|       |        | Both   | 1990 | 1,626  | (1,392 to 1,908)   | 141.2  | (121.2 to 167.9)   |
|       |        |        | 2013 | 2,536  | (2,146 to 3,078)   | 139.5  | (118.9 to 167.3)   |
|       | DALYs  | Male   | 1990 | 20,376 | (16,326 to 24,869) | 2428.5 | (1964.3 to 2964.1) |
|       |        |        | 2013 | 33,669 | (25,304 to 43,381) | 2602.7 | (2020.4 to 3255.9) |
|       |        | Female | 1990 | 22,213 | (17,158 to 28,299) | 2507.1 | (1987.4 to 3228.1) |
|       |        |        | 2013 | 27,807 | (21,234 to 37,694) | 1988.4 | (1577.0 to 2611.8) |
|       |        | Both   | 1990 | 42,590 | (36,081 to 49,870) | 2482.1 | (2116.3 to 2914.6) |
|       |        |        | 2013 | 61,476 | (50,900 to 75,424) | 2271.1 | (1924.0 to 2747.2) |
|       | YLDs   | Male   | 1990 | 152    | (94 to 218)        | 18.4   | (11.6 to 26.8)     |
|       |        |        | 2013 | 283    | (186 to 410)       | 19.3   | (12.7 to 27.5)     |
|       |        | Female | 1990 | 134    | (87 to 191)        | 14.9   | (9.4 to 21.6)      |
|       |        |        | 2013 | 238    | (155 to 328)       | 14.2   | (9.3 to 19.5)      |
|       |        | Both   | 1990 | 286    | (192 to 393)       | 16.6   | (11.0 to 22.9)     |
|       |        |        | 2013 | 522    | (357 to 715)       | 16.5   | (11.2 to 22.4)     |
| Tonga | Deaths | Male   | 1990 | 20     | (14 to 26)         | 103.7  | (77.0 to 132.4)    |
|       |        |        | 2013 | 28     | (20 to 36)         | 105.9  | (77.6 to 135.3)    |
|       |        | Female | 1990 | 25     | (19 to 34)         | 119.2  | (91.6 to 155.5)    |

|                     |         |        | 2013 | 38     | (28 to 49)           | 97.2   | (71.4 to 125.7)      |
|---------------------|---------|--------|------|--------|----------------------|--------|----------------------|
|                     |         | Both   | 1990 | 46     | (37 to 56)           | 112.8  | (92.1 to 136.2)      |
|                     |         |        | 2013 | 66     | (54 to 80)           | 102.5  | (83.2 to 123.2)      |
|                     | DALYs   | Male   | 1990 | 465    | (332 to 608)         | 1880.3 | (1370.7 to 2458.3)   |
|                     |         |        | 2013 | 607    | (437 to 805)         | 1945.3 | (1398.8 to 2548.2)   |
|                     |         | Female | 1990 | 486    | (352 to 666)         | 1896.4 | (1407.3 to 2577.7)   |
|                     |         |        | 2013 | 574    | (415 to 765)         | 1485.1 | (1053.0 to 1971.0)   |
| Country             | measure | sex    | year | number | Uncertainty Interval | Rate   | Uncertainty Interval |
|                     |         | Both   | 1990 | 952    | (757 to 1,190)       | 1897.1 | (1525.2 to 2367.1)   |
|                     |         |        | 2013 | 1,181  | (958 to 1,447)       | 1709.3 | (1383.0 to 2091.7)   |
|                     | YLDs    | Male   | 1990 | 12     | (8 to 17)            | 54     | (35.6 to 75.2)       |
|                     |         |        | 2013 | 16     | (11 to 23)           | 58.3   | (38.1 to 81.5)       |
|                     |         | Female | 1990 | 10     | (6 to 14)            | 39.7   | (25.1 to 57.9)       |
|                     |         |        | 2013 | 15     | (10 to 21)           | 42.6   | (27.3 to 59.1)       |
|                     |         | Both   | 1990 | 22     | (15 to 29)           | 46.3   | (31.8 to 62.0)       |
|                     |         |        | 2013 | 32     | (22 to 44)           | 49.4   | (34.3 to 66.8)       |
| Trinidad and Tobago | Deaths  | Male   | 1990 | 478    | (408 to 556)         | 159.6  | (136.4 to 186.9)     |
|                     |         |        | 2013 | 715    | (567 to 874)         | 140    | (111.8 to 169.9)     |
|                     |         | Female | 1990 | 514    | (424 to 596)         | 132.5  | (109.5 to 153.5)     |
|                     |         |        | 2013 | 623    | (499 to 806)         | 92.5   | (74.2 to 119.6)      |
|                     |         | Both   | 1990 | 992    | (891 to 1,096)       | 144.5  | (129.6 to 160.1)     |
|                     |         |        | 2013 | 1,338  | (1,154 to 1,565)     | 113.2  | (98.1 to 132.8)      |
|                     | DALYs   | Male   | 1990 | 9,851  | (8,402 to 11,486)    | 2787.7 | (2392.7 to 3230.7)   |
|                     |         |        | 2013 | 14,651 | (11,622 to 18,035)   | 2423.3 | (1949.6 to 2950.9)   |
|                     |         | Female | 1990 | 9,415  | (7,772 to 10,871)    | 2226.9 | (1839.1 to 2587.2)   |
|                     |         |        | 2013 | 10,178 | (8,122 to 13,260)    | 1429.5 | (1146.3 to 1852.9)   |
|                     |         | Both   | 1990 | 19,267 | (17,298 to 21,299)   | 2474.8 | (2225.6 to 2741.5)   |

|         |         |        |      |         |                      |        |                      |
|---------|---------|--------|------|---------|----------------------|--------|----------------------|
|         |         |        | 2013 | 24,829  | (21,221 to 29,124)   | 1879.8 | (1615.8 to 2196.5)   |
|         | YLDs    | Male   | 1990 | 222     | (145 to 307)         | 65.8   | (43.1 to 91.6)       |
|         |         |        | 2013 | 368     | (241 to 519)         | 62.3   | (40.6 to 87.8)       |
|         |         | Female | 1990 | 174     | (118 to 239)         | 42.6   | (29.1 to 58.7)       |
|         |         |        | 2013 | 311     | (211 to 424)         | 43.9   | (29.9 to 59.7)       |
|         |         | Both   | 1990 | 397     | (269 to 533)         | 52.9   | (36.0 to 71.7)       |
|         |         |        | 2013 | 680     | (465 to 921)         | 52.3   | (35.7 to 71.2)       |
| Tunisia | Deaths  | Male   | 1990 | 1,793   | (1,417 to 2,267)     | 116.5  | (91.9 to 149.1)      |
|         |         |        | 2013 | 3,104   | (2,182 to 4,252)     | 87.2   | (61.8 to 118.6)      |
|         |         | Female | 1990 | 2,147   | (1,577 to 2,619)     | 140.3  | (103.0 to 170.8)     |
|         |         |        | 2013 | 4,467   | (2,874 to 5,903)     | 104.4  | (67.0 to 137.4)      |
|         |         | Both   | 1990 | 3,941   | (3,259 to 4,647)     | 128.6  | (105.7 to 152.1)     |
|         |         |        | 2013 | 7,571   | (5,774 to 9,396)     | 97     | (73.7 to 119.9)      |
|         | DALYs   | Male   | 1990 | 40,701  | (31,515 to 52,541)   | 1812.7 | (1430.8 to 2297.1)   |
|         |         |        | 2013 | 51,519  | (35,248 to 71,403)   | 1239.5 | (858.4 to 1716.8)    |
|         |         | Female | 1990 | 46,937  | (33,420 to 58,464)   | 2106.3 | (1546.4 to 2573.0)   |
|         |         |        | 2013 | 62,753  | (40,250 to 86,424)   | 1341.5 | (863.0 to 1837.4)    |
|         |         | Both   | 1990 | 87,638  | (71,395 to 104,556)  | 1960.3 | (1616.1 to 2320.1)   |
|         |         |        | 2013 | 114,272 | (86,765 to 145,772)  | 1296.6 | (993.7 to 1640.6)    |
|         | YLDs    | Male   | 1990 | 304     | (201 to 425)         | 13.4   | (8.9 to 18.7)        |
|         |         |        | 2013 | 521     | (345 to 758)         | 11.1   | (7.3 to 15.9)        |
|         |         | Female | 1990 | 248     | (160 to 348)         | 11     | (7.1 to 15.3)        |
|         |         |        | 2013 | 461     | (300 to 655)         | 9      | (5.9 to 12.8)        |
|         |         |        |      |         |                      |        | Uncertainty Interval |
| Country | measure | sex    | year | number  | Uncertainty Interval | Rate   | Interval             |
|         |         | Both   | 1990 | 552     | (373 to 734)         | 12.2   | (8.2 to 16.2)        |
|         |         |        | 2013 | 983     | (669 to 1,382)       | 10     | (6.9 to 14.0)        |
| Turkey  | Deaths  | Male   | 1990 | 17,268  | (14,304 to 20,683)   | 162.5  | (134.5 to 194.2)     |
|         |         |        | 2013 | 18,368  | (14,652 to 23,627)   | 85.3   | (67.9 to 109.4)      |

|              |        |        |      |         |                      |        |                    |
|--------------|--------|--------|------|---------|----------------------|--------|--------------------|
|              |        | Female | 1990 | 18,697  | (15,552 to 24,936)   | 129.7  | (107.2 to 172.0)   |
|              |        |        | 2013 | 26,609  | (20,234 to 30,981)   | 83.7   | (63.9 to 97.9)     |
|              |        | Both   | 1990 | 35,966  | (31,775 to 43,273)   | 143.3  | (126.3 to 171.5)   |
|              |        |        | 2013 | 44,978  | (38,621 to 51,245)   | 84.7   | (72.3 to 96.8)     |
|              | DALYs  | Male   | 1990 | 422,955 | (347,485 to 522,130) | 2706.2 | (2246.8 to 3276.4) |
|              |        |        | 2013 | 323,237 | (256,139 to 415,571) | 1225   | (983.3 to 1582.2)  |
|              |        | Female | 1990 | 368,039 | (288,121 to 509,986) | 2042.2 | (1685.2 to 2806.6) |
|              |        |        | 2013 | 367,410 | (274,618 to 437,797) | 1094.9 | (821.6 to 1297.7)  |
|              |        | Both   | 1990 | 790,995 | (671,784 to 974,619) | 2339.8 | (2049.4 to 2853.7) |
|              |        |        | 2013 | 690,647 | (578,004 to 801,453) | 1153   | (970.7 to 1332.3)  |
|              | YLDs   | Male   | 1990 | 1,805   | (1,187 to 2,552)     | 11.6   | (7.7 to 16.3)      |
|              |        |        | 2013 | 3,297   | (2,109 to 4,546)     | 11.2   | (7.2 to 15.4)      |
|              |        | Female | 1990 | 1,578   | (1,033 to 2,201)     | 9      | (5.8 to 12.7)      |
|              |        |        | 2013 | 3,045   | (2,005 to 4,318)     | 8.6    | (5.7 to 12.3)      |
|              |        | Both   | 1990 | 3,384   | (2,286 to 4,697)     | 10.2   | (7.0 to 14.1)      |
|              |        |        | 2013 | 6,343   | (4,311 to 8,590)     | 9.8    | (6.6 to 13.2)      |
| Turkmenistan | Deaths | Male   | 1990 | 1,286   | (1,116 to 1,504)     | 204.2  | (176.1 to 239.2)   |
|              |        |        | 2013 | 2,352   | (1,770 to 3,182)     | 206.5  | (160.7 to 271.1)   |
|              |        | Female | 1990 | 1,558   | (1,389 to 1,850)     | 166.8  | (150.0 to 198.7)   |
|              |        |        | 2013 | 2,228   | (1,756 to 3,021)     | 148.2  | (118.4 to 200.1)   |
|              |        | Both   | 1990 | 2,844   | (2,621 to 3,165)     | 181.9  | (167.5 to 204.3)   |
|              |        |        | 2013 | 4,581   | (3,785 to 5,694)     | 173.7  | (146.3 to 213.4)   |
|              | DALYs  | Male   | 1990 | 33,144  | (28,583 to 38,752)   | 4010.7 | (3475.7 to 4677.4) |
|              |        |        | 2013 | 59,909  | (43,362 to 82,712)   | 4016.2 | (3008.7 to 5447.6) |
|              |        | Female | 1990 | 33,112  | (28,827 to 38,683)   | 3071.3 | (2699.2 to 3595.2) |
|              |        |        | 2013 | 45,112  | (33,944 to 63,340)   | 2542.9 | (1964.8 to 3505.1) |
|              |        | Both   | 1990 | 66,256  | (60,349 to 74,129)   | 3468   | (3182.1 to 3860.0) |
|              |        |        | 2013 | 105,021 | (83,904 to 133,838)  | 3202.4 | (2605.0 to 4038.3) |



|                      |         |        |      |           |                          |        |                      |
|----------------------|---------|--------|------|-----------|--------------------------|--------|----------------------|
|                      |         |        | 2013 | 65,864    | (57,949 to 85,188)       | 124.8  | (110.2 to 160.8)     |
|                      |         | Both   | 1990 | 118,260   | (99,058 to 127,795)      | 193.1  | (160.8 to 208.4)     |
|                      |         |        | 2013 | 110,361   | (99,429 to 131,553)      | 144.7  | (130.2 to 171.9)     |
|                      | DALYs   | Male   | 1990 | 743,611   | (618,153 to 858,990)     | 3380.2 | (2813.1 to 3900.6)   |
|                      |         |        | 2013 | 797,094   | (680,359 to 944,166)     | 3035.9 | (2602.4 to 3599.2)   |
|                      |         | Female | 1990 | 1,101,062 | (860,742 to 1,181,623)   | 2633.1 | (2048.9 to 2828.1)   |
|                      |         |        | 2013 | 836,252   | (739,558 to 1,076,318)   | 1762.9 | (1566.7 to 2253.3)   |
|                      |         | Both   | 1990 | 1,844,674 | (1,571,852 to 1,999,064) | 2933.5 | (2498.7 to 3178.0)   |
|                      |         |        | 2013 | 1,633,346 | (1,467,323 to 1,911,644) | 2272.7 | (2038.5 to 2648.5)   |
|                      | YLDs    | Male   | 1990 | 11,912    | (7,975 to 17,026)        | 49.5   | (33.6 to 69.7)       |
|                      |         |        | 2013 | 14,572    | (9,519 to 20,375)        | 55.5   | (36.4 to 77.2)       |
|                      |         | Female | 1990 | 11,869    | (7,848 to 16,480)        | 31.2   | (20.7 to 42.5)       |
|                      |         |        | 2013 | 12,133    | (8,153 to 17,104)        | 29.9   | (19.8 to 41.4)       |
|                      |         | Both   | 1990 | 23,782    | (16,172 to 32,143)       | 38.6   | (26.5 to 51.9)       |
|                      |         |        | 2013 | 26,706    | (18,354 to 36,070)       | 40.3   | (27.8 to 54.7)       |
| United Arab Emirates | Deaths  | Male   | 1990 | 274       | (176 to 416)             | 141.2  | (98.7 to 200.5)      |
|                      |         |        | 2013 | 585       | (385 to 857)             | 108.8  | (77.1 to 143.9)      |
|                      |         | Female | 1990 | 204       | (100 to 306)             | 178.3  | (96.0 to 259.4)      |
|                      |         |        | 2013 | 244       | (127 to 381)             | 109.7  | (62.8 to 157.1)      |
|                      |         | Both   | 1990 | 479       | (336 to 648)             | 159.4  | (111.9 to 207.0)     |
|                      |         |        | 2013 | 829       | (595 to 1,112)           | 110.2  | (82.9 to 137.4)      |
|                      | DALYs   | Male   | 1990 | 9,003     | (5,732 to 13,698)        | 2244.9 | (1500.2 to 3335.9)   |
|                      |         |        | 2013 | 21,384    | (13,699 to 32,715)       | 1576.1 | (1087.5 to 2149.4)   |
|                      |         |        |      |           |                          |        | Uncertainty Interval |
| Country              | measure | sex    | year | number    | Uncertainty Interval     | Rate   | Interval             |
|                      |         | Female | 1990 | 4,837     | (2,081 to 7,574)         | 2765.6 | (1386.4 to 4189.3)   |

|                |        |        |      |           |                        |        |                    |
|----------------|--------|--------|------|-----------|------------------------|--------|--------------------|
|                |        |        | 2013 | 7,185     | (3,548 to 11,493)      | 1446.6 | (801.7 to 2167.0)  |
|                |        | Both   | 1990 | 13,841    | (9,529 to 19,270)      | 2471   | (1723.2 to 3292.9) |
|                |        |        | 2013 | 28,569    | (20,093 to 39,779)     | 1538.6 | (1142.0 to 1967.0) |
|                | YLDs   | Male   | 1990 | 58        | (37 to 84)             | 10.6   | (6.9 to 14.5)      |
|                |        |        | 2013 | 289       | (178 to 419)           | 10.5   | (6.9 to 14.6)      |
|                |        | Female | 1990 | 18        | (11 to 25)             | 8.2    | (5.4 to 11.7)      |
|                |        |        | 2013 | 90        | (59 to 131)            | 9.2    | (6.1 to 13.3)      |
|                |        | Both   | 1990 | 77        | (50 to 106)            | 9.7    | (6.6 to 13.0)      |
|                |        |        | 2013 | 379       | (247 to 535)           | 10.1   | (6.8 to 13.8)      |
| United Kingdom | Deaths | Male   | 1990 | 27,840    | (23,714 to 33,478)     | 86.6   | (73.5 to 104.2)    |
|                |        |        | 2013 | 22,202    | (17,010 to 26,516)     | 44.4   | (34.0 to 52.9)     |
|                |        | Female | 1990 | 48,096    | (37,217 to 53,209)     | 82.3   | (64.0 to 91.6)     |
|                |        |        | 2013 | 34,944    | (30,517 to 45,487)     | 46.4   | (40.6 to 60.4)     |
|                |        | Both   | 1990 | 75,937    | (65,252 to 83,106)     | 84.9   | (73.1 to 93.3)     |
|                |        |        | 2013 | 57,146    | (50,461 to 67,587)     | 46     | (40.9 to 54.0)     |
|                | DALYs  | Male   | 1990 | 449,366   | (386,885 to 537,577)   | 1351.4 | (1165.9 to 1613.3) |
|                |        |        | 2013 | 311,623   | (244,694 to 369,554)   | 669.7  | (527.1 to 794.5)   |
|                |        | Female | 1990 | 567,309   | (455,041 to 631,985)   | 1128.8 | (912.2 to 1268.7)  |
|                |        |        | 2013 | 351,357   | (310,354 to 446,756)   | 572.6  | (500.7 to 723.6)   |
|                |        | Both   | 1990 | 1,016,675 | (901,984 to 1,123,040) | 1228.5 | (1094.9 to 1360.1) |
|                |        |        | 2013 | 662,981   | (589,970 to 752,428)   | 620.8  | (550.4 to 702.2)   |
|                | YLDs   | Male   | 1990 | 34,993    | (24,685 to 46,264)     | 104    | (73.4 to 137.3)    |
|                |        |        | 2013 | 54,919    | (38,580 to 71,446)     | 119.7  | (83.9 to 155.7)    |
|                |        | Female | 1990 | 36,261    | (25,770 to 47,462)     | 76.7   | (54.2 to 100.7)    |
|                |        |        | 2013 | 46,560    | (33,063 to 59,949)     | 83.9   | (59.8 to 108.7)    |
|                |        | Both   | 1990 | 71,255    | (50,547 to 93,020)     | 88.5   | (62.7 to 115.6)    |
|                |        |        | 2013 | 101,479   | (72,315 to 130,842)    | 100.6  | (71.6 to 129.9)    |
| United States  | Deaths | Male   | 1990 | 61,606    | (50,656 to 78,465)     | 54.1   | (44.3 to 69.2)     |



|                |                |            |             |               |                             |             |                             |
|----------------|----------------|------------|-------------|---------------|-----------------------------|-------------|-----------------------------|
|                |                |            | 2013        | 68,227        | (51,583 to 85,185)          | 34.7        | (26.3 to 43.2)              |
|                |                | Female     | 1990        | 88,130        | (73,029 to 110,975)         | 46.1        | (38.5 to 57.8)              |
|                |                |            | 2013        | 96,005        | (73,005 to 123,933)         | 33.1        | (25.2 to 42.3)              |
|                |                | Both       | 1990        | 149,736       | (133,496 to 176,913)        | 49.6        | (44.3 to 58.6)              |
|                |                |            | 2013        | 164,233       | (133,123 to 194,315)        | 34          | (27.9 to 40.0)              |
|                | DALYs          | Male       | 1990        | 1,199,220     | (1,017,442 to 1,464,489)    | 1002.3      | (852.4 to 1220.5)           |
|                |                |            | 2013        | 1,358,955     | (1,112,176 to 1,617,059)    | 705.3       | (576.4 to 838.6)            |
|                |                | Female     | 1990        | 1,293,582     | (1,120,609 to 1,587,055)    | 775.7       | (673.4 to 954.9)            |
|                |                |            | 2013        | 1,478,171     | (1,213,431 to 1,766,154)    | 620.7       | (512.7 to 736.3)            |
| <b>Country</b> | <b>measure</b> | <b>sex</b> | <b>year</b> | <b>number</b> | <b>Uncertainty Interval</b> | <b>Rate</b> | <b>Uncertainty Interval</b> |
|                |                | Both       | 1990        | 2,492,803     | (2,244,755 to 2,864,834)    | 873.2       | (787.7 to 1005.5)           |
|                |                |            | 2013        | 2,837,127     | (2,415,461 to 3,245,780)    | 659.7       | (560.4 to 757.0)            |
|                | YLDs           | Male       | 1990        | 178,475       | (119,534 to 246,611)        | 149.4       | (100.4 to 205.2)            |
|                |                |            | 2013        | 394,789       | (279,181 to 511,525)        | 204.8       | (144.5 to 265.1)            |
|                |                | Female     | 1990        | 207,614       | (134,783 to 292,909)        | 123.1       | (80.2 to 175.5)             |
|                |                |            | 2013        | 462,207       | (330,876 to 611,053)        | 203         | (145.6 to 268.6)            |
|                |                | Both       | 1990        | 386,089       | (262,598 to 521,404)        | 134         | (91.2 to 180.7)             |
|                |                |            | 2013        | 856,996       | (611,498 to 1,123,381)      | 203.2       | (144.7 to 267.7)            |
| Uruguay        | Deaths         | Male       | 1990        | 1,710         | (1,457 to 2,011)            | 124.7       | (105.9 to 146.7)            |
|                |                |            | 2013        | 1,727         | (1,385 to 2,067)            | 91.8        | (73.7 to 110.1)             |
|                |                | Female     | 1990        | 2,208         | (1,940 to 2,720)            | 106.8       | (94.0 to 131.2)             |
|                |                |            | 2013        | 2,385         | (1,926 to 3,147)            | 69.4        | (56.6 to 91.0)              |

|            |        |        |      |         |                      |        |                    |
|------------|--------|--------|------|---------|----------------------|--------|--------------------|
|            |        | Both   | 1990 | 3,919   | (3,546 to 4,551)     | 115    | (104.0 to 133.4)   |
|            |        |        | 2013 | 4,113   | (3,575 to 4,915)     | 78.8   | (68.5 to 92.8)     |
|            | DALYs  | Male   | 1990 | 30,090  | (25,836 to 35,323)   | 2046.4 | (1766.2 to 2398.4) |
|            |        |        | 2013 | 26,358  | (21,041 to 31,962)   | 1433.5 | (1142.0 to 1741.6) |
|            |        | Female | 1990 | 30,111  | (26,863 to 37,159)   | 1544.9 | (1375.6 to 1902.4) |
|            |        |        | 2013 | 25,415  | (20,608 to 32,783)   | 915.8  | (733.7 to 1179.5)  |
|            |        | Both   | 1990 | 60,201  | (55,115 to 68,893)   | 1767.3 | (1616.3 to 2018.2) |
|            |        |        | 2013 | 51,773  | (44,898 to 60,015)   | 1137.6 | (982.3 to 1316.3)  |
|            | YLDs   | Male   | 1990 | 679     | (456 to 945)         | 44.9   | (30.1 to 62.5)     |
|            |        |        | 2013 | 781     | (520 to 1,104)       | 43     | (28.7 to 60.8)     |
|            |        | Female | 1990 | 485     | (325 to 672)         | 25.5   | (17.2 to 35.3)     |
|            |        |        | 2013 | 587     | (394 to 800)         | 24.5   | (16.7 to 33.3)     |
|            |        | Both   | 1990 | 1,164   | (798 to 1,554)       | 34     | (23.4 to 45.3)     |
|            |        |        | 2013 | 1,368   | (945 to 1,816)       | 32.5   | (22.5 to 43.2)     |
| Uzbekistan | Deaths | Male   | 1990 | 6,855   | (5,930 to 7,995)     | 189.2  | (163.9 to 220.5)   |
|            |        |        | 2013 | 12,887  | (9,902 to 16,747)    | 203.7  | (159.0 to 258.4)   |
|            |        | Female | 1990 | 8,731   | (7,844 to 10,297)    | 156.9  | (141.1 to 185.2)   |
|            |        |        | 2013 | 12,786  | (9,866 to 16,046)    | 154.9  | (119.9 to 192.4)   |
|            |        | Both   | 1990 | 15,587  | (14,284 to 17,404)   | 169.9  | (155.6 to 190.5)   |
|            |        |        | 2013 | 25,673  | (21,758 to 30,875)   | 177.2  | (150.4 to 210.1)   |
|            | DALYs  | Male   | 1990 | 144,118 | (124,033 to 167,684) | 3355.9 | (2896.7 to 3886.0) |
|            |        |        | 2013 | 278,473 | (207,371 to 373,536) | 3564.3 | (2726.2 to 4689.6) |
|            |        | Female | 1990 | 148,341 | (129,572 to 170,862) | 2549.6 | (2245.4 to 2949.0) |
|            |        |        | 2013 | 211,172 | (157,174 to 280,294) | 2334.5 | (1757.6 to 3032.1) |
|            |        | Both   | 1990 | 292,460 | (266,997 to 324,399) | 2890.8 | (2651.9 to 3220.4) |
|            |        |        | 2013 | 489,646 | (403,778 to 603,288) | 2903.5 | (2438.1 to 3535.1) |
|            | YLDs   | Male   | 1990 | 849     | (569 to 1,188)       | 16.8   | (11.4 to 23.8)     |
|            |        |        | 2013 | 1,535   | (1,017 to 2,118)     | 16.7   | (11.0 to 23.0)     |

| Country   | measure | sex    | year | number | Uncertainty Interval | Rate   | Uncertainty Interval |
|-----------|---------|--------|------|--------|----------------------|--------|----------------------|
|           |         | Female | 1990 | 776    | (519 to 1,077)       | 12.6   | (8.3 to 17.6)        |
|           |         |        | 2013 | 1,253  | (835 to 1,815)       | 12.3   | (8.2 to 17.8)        |
|           |         | Both   | 1990 | 1,626  | (1,094 to 2,245)     | 14.5   | (9.8 to 19.9)        |
|           |         |        | 2013 | 2,788  | (1,913 to 3,798)     | 14.4   | (9.9 to 19.7)        |
| Vanuatu   | Deaths  | Male   | 1990 | 66     | (43 to 92)           | 205.3  | (136.8 to 276.6)     |
|           |         |        | 2013 | 118    | (76 to 166)          | 209.9  | (140.7 to 279.8)     |
|           |         | Female | 1990 | 33     | (21 to 51)           | 131.6  | (85.4 to 199.4)      |
|           |         |        | 2013 | 83     | (48 to 127)          | 158.6  | (97.8 to 230.4)      |
|           |         | Both   | 1990 | 100    | (68 to 139)          | 172.3  | (122.4 to 233.1)     |
|           |         |        | 2013 | 202    | (130 to 287)         | 184.2  | (125.3 to 249.0)     |
|           | DALYs   | Male   | 1990 | 1,671  | (1,045 to 2,435)     | 4311.8 | (2748.8 to 6149.1)   |
|           |         |        | 2013 | 3,159  | (1,990 to 4,732)     | 4299.3 | (2763.8 to 6129.1)   |
|           |         | Female | 1990 | 794    | (479 to 1,259)       | 2532.5 | (1572.6 to 3943.5)   |
|           |         |        | 2013 | 2,011  | (1,081 to 3,211)     | 2923.8 | (1654.5 to 4502.9)   |
|           |         | Both   | 1990 | 2,466  | (1,579 to 3,641)     | 3493   | (2302.1 to 5028.1)   |
|           |         |        | 2013 | 5,170  | (3,183 to 7,750)     | 3610.9 | (2304.6 to 5212.7)   |
|           | YLDs    | Male   | 1990 | 19     | (13 to 27)           | 58.3   | (39.0 to 79.7)       |
|           |         |        | 2013 | 36     | (23 to 50)           | 58.5   | (39.0 to 80.3)       |
|           |         | Female | 1990 | 11     | (7 to 15)            | 40.6   | (27.8 to 55.3)       |
|           |         |        | 2013 | 26     | (17 to 36)           | 42.7   | (28.4 to 59.8)       |
|           |         | Both   | 1990 | 31     | (21 to 42)           | 50.4   | (34.1 to 67.9)       |
|           |         |        | 2013 | 62     | (42 to 84)           | 50.6   | (34.4 to 67.8)       |
| Venezuela | Deaths  | Male   | 1990 | 3,229  | (2,722 to 3,869)     | 95.4   | (80.3 to 114.2)      |
|           |         |        | 2013 | 6,458  | (5,244 to 7,892)     | 73.9   | (59.6 to 90.8)       |
|           |         | Female | 1990 | 3,532  | (3,008 to 4,271)     | 88.7   | (75.7 to 107.3)      |
|           |         |        | 2013 | 6,532  | (5,059 to 7,839)     | 65.2   | (50.0 to 78.1)       |
|           |         | Both   | 1990 | 6,762  | (6,099 to 7,609)     | 92     | (82.8 to 103.9)      |

|         |        |        |      |           |                          |        |                    |
|---------|--------|--------|------|-----------|--------------------------|--------|--------------------|
|         |        |        | 2013 | 12,991    | (11,173 to 14,756)       | 69.5   | (59.6 to 79.5)     |
|         | DALYs  | Male   | 1990 | 71,687    | (61,003 to 86,183)       | 1582.1 | (1340.9 to 1894.1) |
|         |        |        | 2013 | 129,311   | (103,919 to 157,907)     | 1210.2 | (985.9 to 1465.7)  |
|         |        | Female | 1990 | 70,405    | (58,771 to 82,695)       | 1390.1 | (1181.4 to 1660.1) |
|         |        |        | 2013 | 104,858   | (84,417 to 125,570)      | 914.1  | (734.2 to 1092.8)  |
|         |        | Both   | 1990 | 142,092   | (127,114 to 160,566)     | 1480   | (1328.9 to 1661.4) |
|         |        |        | 2013 | 234,169   | (201,048 to 267,623)     | 1057.1 | (913.9 to 1202.3)  |
|         | YLDs   | Male   | 1990 | 1,319     | (869 to 1,832)           | 27.6   | (18.3 to 38.2)     |
|         |        |        | 2013 | 3,091     | (2,019 to 4,234)         | 27.9   | (18.5 to 38.4)     |
|         |        | Female | 1990 | 971       | (655 to 1,383)           | 18.8   | (12.5 to 27.2)     |
|         |        |        | 2013 | 2,242     | (1,479 to 3,136)         | 18.7   | (12.5 to 26.0)     |
|         |        | Both   | 1990 | 2,290     | (1,582 to 3,080)         | 22.9   | (16.0 to 30.7)     |
|         |        |        | 2013 | 5,333     | (3,598 to 7,204)         | 23.1   | (15.5 to 31.0)     |
| Vietnam | Deaths | Male   | 1990 | 47,383    | (39,465 to 55,004)       | 308.5  | (259.5 to 353.8)   |
|         |        |        | 2013 | 63,146    | (48,875 to 81,044)       | 238.4  | (186.2 to 304.5)   |
|         |        | Female | 1990 | 57,247    | (47,278 to 69,269)       | 242.2  | (199.9 to 293.1)   |
|         |        |        | 2013 | 82,587    | (66,342 to 97,666)       | 170.6  | (135.5 to 205.2)   |
|         |        | Both   | 1990 | 104,631   | (91,614 to 118,032)      | 272.7  | (239.1 to 306.9)   |
|         |        |        | 2013 | 145,734   | (123,670 to 169,740)     | 198.7  | (168.7 to 232.3)   |
|         | DALYs  | Male   | 1990 | 1,058,216 | (859,893 to 1,263,728)   | 5934.3 | (4885.3 to 7011.3) |
|         |        |        | 2013 | 1,158,336 | (848,611 to 1,549,263)   | 3799.4 | (2821.9 to 5066.9) |
|         |        | Female | 1990 | 891,091   | (718,272 to 1,103,721)   | 3803.7 | (3068.5 to 4709.5) |
|         |        |        | 2013 | 949,834   | (732,303 to 1,199,392)   | 2155   | (1646.9 to 2768.8) |
|         |        | Both   | 1990 | 1,949,307 | (1,673,659 to 2,232,714) | 4771.4 | (4105.9 to 5434.5) |
|         |        |        | 2013 | 2,108,170 | (1,719,529 to 2,565,870) | 2863.1 | (2339.9 to 3487.0) |

|        |        |        |      |         |                      |        |                    |
|--------|--------|--------|------|---------|----------------------|--------|--------------------|
|        | YLDs   | Male   | 1990 | 10,859  | (7,436 to 14,659)    | 63.4   | (43.7 to 85.4)     |
|        |        |        | 2013 | 17,378  | (11,849 to 24,156)   | 57.6   | (39.3 to 80.8)     |
|        |        | Female | 1990 | 10,902  | (7,636 to 14,310)    | 45.9   | (32.2 to 60.5)     |
|        |        |        | 2013 | 18,631  | (12,542 to 25,997)   | 43.3   | (29.6 to 60.7)     |
|        |        | Both   | 1990 | 21,762  | (15,505 to 28,245)   | 53.1   | (37.8 to 69.3)     |
|        |        |        | 2013 | 36,009  | (25,359 to 48,878)   | 49.3   | (34.9 to 67.1)     |
| Yemen  | Deaths | Male   | 1990 | 3,272   | (2,223 to 4,755)     | 206.3  | (146.2 to 289.5)   |
|        |        |        | 2013 | 6,796   | (4,365 to 10,153)    | 192.9  | (132.2 to 270.9)   |
|        |        | Female | 1990 | 4,473   | (2,906 to 6,799)     | 217.1  | (150.3 to 327.2)   |
|        |        |        | 2013 | 8,511   | (5,366 to 13,360)    | 220.2  | (146.1 to 329.9)   |
|        |        | Both   | 1990 | 7,746   | (5,305 to 11,450)    | 212.5  | (150.5 to 309.4)   |
|        |        |        | 2013 | 15,307  | (10,163 to 23,273)   | 207.2  | (145.1 to 295.9)   |
|        | DALYs  | Male   | 1990 | 113,229 | (73,231 to 166,545)  | 3941.5 | (2611.3 to 5902.5) |
|        |        |        | 2013 | 180,332 | (109,306 to 278,566) | 3378.4 | (2135.3 to 5100.9) |
|        |        | Female | 1990 | 137,946 | (78,516 to 209,276)  | 4191.4 | (2634.1 to 6515.8) |
|        |        |        | 2013 | 216,788 | (131,158 to 355,866) | 3950.2 | (2449.2 to 6304.9) |
|        |        | Both   | 1990 | 251,176 | (163,131 to 362,256) | 4082.7 | (2747.0 to 6154.3) |
|        |        |        | 2013 | 397,121 | (252,476 to 624,272) | 3678.9 | (2399.1 to 5690.0) |
|        | YLDs   | Male   | 1990 | 231     | (154 to 319)         | 11.3   | (7.7 to 15.9)      |
|        |        |        | 2013 | 578     | (368 to 809)         | 10.8   | (6.8 to 15.2)      |
|        |        | Female | 1990 | 217     | (141 to 311)         | 8.6    | (5.7 to 12.3)      |
|        |        |        | 2013 | 488     | (314 to 695)         | 8.6    | (5.7 to 12.3)      |
|        |        | Both   | 1990 | 448     | (304 to 613)         | 9.8    | (6.7 to 13.4)      |
|        |        |        | 2013 | 1,066   | (725 to 1,473)       | 9.7    | (6.6 to 13.2)      |
| Zambia | Deaths | Male   | 1990 | 530     | (385 to 674)         | 53.6   | (38.0 to 68.4)     |
|        |        |        | 2013 | 2,215   | (1,709 to 2,878)     | 130.4  | (101.1 to 167.0)   |
|        |        | Female | 1990 | 2,000   | (1,559 to 2,382)     | 178.1  | (137.6 to 212.2)   |
|        |        |        | 2013 | 4,531   | (3,528 to 5,686)     | 230.6  | (181.0 to 286.7)   |

|          |         | Both   | 1990 | 2,531   | (2,037 to 2,924)     | 123.1  | (97.8 to 144.7)      |
|----------|---------|--------|------|---------|----------------------|--------|----------------------|
|          |         |        | 2013 | 6,746   | (5,598 to 8,096)     | 186.3  | (155.5 to 221.4)     |
|          | DALYs   | Male   | 1990 | 14,763  | (10,960 to 19,047)   | 867.5  | (633.8 to 1106.6)    |
|          |         |        | 2013 | 47,073  | (35,437 to 61,670)   | 2100.6 | (1601.2 to 2733.2)   |
| Country  | measure | sex    | year | number  | Uncertainty Interval | Rate   | Uncertainty Interval |
|          |         | Female | 1990 | 40,408  | (31,684 to 48,441)   | 2754.9 | (2142.6 to 3287.0)   |
|          |         |        | 2013 | 84,031  | (64,524 to 107,494)  | 3572.9 | (2735.7 to 4531.2)   |
|          |         | Both   | 1990 | 55,172  | (44,923 to 64,288)   | 1904.2 | (1539.0 to 2204.7)   |
|          |         |        | 2013 | 131,105 | (106,690 to 157,261) | 2902.4 | (2388.8 to 3504.9)   |
|          | YLDs    | Male   | 1990 | 222     | (140 to 325)         | 13.1   | (8.0 to 19.3)        |
|          |         |        | 2013 | 394     | (266 to 581)         | 12.8   | (8.4 to 19.2)        |
|          |         | Female | 1990 | 166     | (107 to 243)         | 9.1    | (5.9 to 13.3)        |
|          |         |        | 2013 | 278     | (174 to 421)         | 8.7    | (5.4 to 13.8)        |
|          |         | Both   | 1990 | 389     | (255 to 550)         | 11     | (7.2 to 15.6)        |
|          |         |        | 2013 | 673     | (453 to 940)         | 10.7   | (7.1 to 15.1)        |
| Zimbabwe | Deaths  | Male   | 1990 | 1,222   | (974 to 1,611)       | 78.9   | (62.4 to 106.0)      |
|          |         |        | 2013 | 2,736   | (1,798 to 3,745)     | 102.3  | (65.0 to 140.6)      |
|          |         | Female | 1990 | 2,400   | (1,934 to 2,841)     | 143.9  | (115.2 to 170.3)     |
|          |         |        | 2013 | 4,280   | (2,972 to 6,230)     | 128.4  | (88.4 to 190.8)      |
|          |         | Both   | 1990 | 3,622   | (3,150 to 4,200)     | 114.6  | (99.5 to 132.8)      |
|          |         |        | 2013 | 7,016   | (5,361 to 8,999)     | 117.7  | (88.8 to 152.9)      |
|          | DALYs   | Male   | 1990 | 32,066  | (25,579 to 42,249)   | 1464   | (1172.8 to 1919.0)   |
|          |         |        | 2013 | 74,853  | (50,737 to 100,938)  | 1977.2 | (1294.1 to 2723.6)   |
|          |         | Female | 1990 | 52,145  | (41,461 to 62,548)   | 2449   | (1958.6 to 2891.2)   |
|          |         |        | 2013 | 103,349 | (70,757 to 143,609)  | 2257.6 | (1550.1 to 3362.5)   |
|          |         | Both   | 1990 | 84,211  | (72,757 to 99,460)   | 1992.4 | (1726.9 to 2307.5)   |
|          |         |        | 2013 | 178,202 | (131,388 to 224,574) | 2137.6 | (1611.7 to 2764.0)   |
|          | YLDs    | Male   | 1990 | 479     | (320 to 652)         | 22.3   | (14.5 to 30.7)       |

|  |  |        |      |       |                  |      |                |
|--|--|--------|------|-------|------------------|------|----------------|
|  |  |        | 2013 | 678   | (452 to 945)     | 22.1 | (14.4 to 31.0) |
|  |  | Female | 1990 | 506   | (332 to 704)     | 21.7 | (14.4 to 30.2) |
|  |  |        | 2013 | 809   | (536 to 1,144)   | 22.3 | (14.6 to 31.5) |
|  |  | Both   | 1990 | 985   | (674 to 1,324)   | 22   | (15.2 to 30.0) |
|  |  |        | 2013 | 1,487 | (1,012 to 2,020) | 22.3 | (15.0 to 30.3) |

Web Appendix B. Country-specific age-standardized stroke burden per 100 000 in 2013 for males and females stratified by stroke type.

| Country     | measure | Stroke Type     | sex  | year | Counts, All ages |                | Rate per 100,000, Age-standardized |                 |
|-------------|---------|-----------------|------|------|------------------|----------------|------------------------------------|-----------------|
|             |         |                 |      |      | Mean             | 95% UI         | Mean                               | 95%UI           |
| Afghanistan | Deaths  | Ischemic Stroke | Male | 1990 | 1,014            | (502 to 1,637) | 112.1                              | (59.7 to 166.3) |

|  |        |                    |        |      |         |                      |        |                    |
|--|--------|--------------------|--------|------|---------|----------------------|--------|--------------------|
|  |        |                    |        | 2013 | 3,545   | (1,607 to 5,906)     | 116    | (56.4 to 180.0)    |
|  |        |                    | Female | 1990 | 1,657   | (878 to 2,810)       | 133    | (77.6 to 194.8)    |
|  |        |                    |        | 2013 | 5,588   | (2,818 to 9,586)     | 145.3  | (78.2 to 220.0)    |
|  |        |                    | Both   | 1990 | 2,672   | (1,619 to 3,829)     | 123.8  | (82.6 to 165.8)    |
|  |        |                    |        | 2013 | 9,133   | (5,010 to 13,559)    | 132.2  | (78.2 to 180.3)    |
|  | Deaths | Hemorrhagic Stroke | Male   | 1990 | 1,343   | (755 to 2,148)       | 105.3  | (60.0 to 168.8)    |
|  |        |                    |        | 2013 | 4,716   | (2,630 to 7,665)     | 115.1  | (67.0 to 181.7)    |
|  |        |                    | Female | 1990 | 2,902   | (1,284 to 5,445)     | 167    | (84.4 to 296.0)    |
|  |        |                    |        | 2013 | 9,427   | (4,480 to 18,278)    | 184.6  | (97.0 to 344.6)    |
|  |        |                    | Both   | 1990 | 4,245   | (2,503 to 6,899)     | 139    | (90.1 to 216.3)    |
|  |        |                    |        | 2013 | 14,144  | (8,693 to 23,874)    | 152.1  | (98.7 to 245.2)    |
|  | DALYs  | Ischemic Stroke    | Male   | 1990 | 24,020  | (11,076 to 42,231)   | 1807.4 | (929.9 to 2808.7)  |
|  |        |                    |        | 2013 | 77,306  | (33,404 to 138,329)  | 1833.5 | (841.7 to 3013.9)  |
|  |        |                    | Female | 1990 | 40,181  | (19,212 to 76,378)   | 2288.3 | (1253.0 to 3822.5) |
|  |        |                    |        | 2013 | 122,347 | (56,702 to 243,732)  | 2429.1 | (1218.3 to 4213.1) |
|  |        |                    | Both   | 1990 | 64,201  | (35,584 to 101,799)  | 2068.5 | (1291.0 to 2889.0) |
|  |        |                    |        | 2013 | 199,654 | (102,000 to 320,874) | 2149.3 | (1186.6 to 3174.9) |
|  |        | Hemorrhagic Stroke | Male   | 1990 | 40,996  | (22,305 to 66,672)   | 2138   | (1217.6 to 3465.7) |
|  |        |                    |        | 2013 | 132,739 | (72,666 to 217,256)  | 2319.3 | (1298.4 to 3760.8) |
|  |        |                    | Female | 1990 | 92,134  | (38,808 to 173,694)  | 3814.5 | (1719.0 to 7117.5) |
|  |        |                    |        | 2013 | 280,419 | (123,167 to 552,508) | 4192.5 | (1981.0 to 8144.9) |



|         |         |                    | Both   | 1990 | 133,131          | (75,853 to 217,798)  | 3022.5                             | (1807.6 to 4835.6) |
|---------|---------|--------------------|--------|------|------------------|----------------------|------------------------------------|--------------------|
|         |         |                    |        | 2013 | 413,158          | (244,179 to 700,287) | 3282.7                             | (2017.3 to 5528.6) |
|         | YLDs    | Ischemic Stroke    | Male   | 1990 | 180              | (115 to 260)         | 9.2                                | (5.9 to 13.4)      |
|         |         |                    |        | 2013 | 564              | (368 to 815)         | 9.6                                | (6.4 to 13.5)      |
|         |         |                    | Female | 1990 | 153              | (95 to 223)          | 7.3                                | (4.7 to 10.5)      |
|         |         |                    |        |      | Counts, All ages |                      | Rate per 100,000, Age-standardized |                    |
| Country | measure | Stroke Type        | sex    | year | Mean             | 95% UI               | Mean                               | 95% UI             |
|         |         |                    |        | 2013 | 468              | (302 to 666)         | 7.6                                | (5.0 to 10.7)      |
|         |         |                    | Both   | 1990 | 334              | (215 to 477)         | 8.2                                | (5.4 to 11.4)      |
|         |         |                    |        | 2013 | 1,032            | (695 to 1,431)       | 8.5                                | (5.9 to 11.8)      |
|         |         | Hemorrhagic Stroke | Male   | 1990 | 31               | (16 to 52)           | 1.2                                | (0.7 to 2.0)       |
|         |         |                    |        | 2013 | 87               | (51 to 137)          | 1.3                                | (0.8 to 2.0)       |
|         |         |                    | Female | 1990 | 34               | (20 to 52)           | 1.4                                | (0.8 to 2.0)       |
|         |         |                    |        | 2013 | 85               | (46 to 132)          | 1.2                                | (0.7 to 1.9)       |
|         |         |                    | Both   | 1990 | 66               | (41 to 95)           | 1.3                                | (0.8 to 1.8)       |
|         |         |                    | Both   | 2013 | 172              | (107 to 253)         | 1.2                                | (0.8 to 1.8)       |
| Albania | Deaths  | Ischemic Stroke    | Male   | 1990 | 303              | (219 to 364)         | 43.4                               | (31.2 to 52.7)     |
|         |         |                    |        | 2013 | 663              | (420 to 1,033)       | 45.2                               | (28.4 to 71.2)     |
|         |         |                    | Female | 1990 | 320              | (238 to 387)         | 36.2                               | (26.6 to 43.6)     |
|         |         |                    |        | 2013 | 585              | (329 to 832)         | 32.4                               | (18.4 to 45.9)     |
|         |         |                    | Both   | 1990 | 624              | (513 to 714)         | 39.4                               | (32.1 to 45.2)     |
|         |         |                    |        | 2013 | 1,248            | (836 to 1,678)       | 38.3                               | (25.5 to 51.4)     |
|         | Deaths  | Hemorrhagic Stroke | Male   | 1990 | 1,118            | (989 to 1,280)       | 150.8                              | (133.5 to 173.4)   |
|         |         |                    |        | 2013 | 2,549            | (1,958 to 3,250)     | 171                                | (132.1 to 214.0)   |
|         |         |                    | Female | 1990 | 1,290            | (1,170 to 1,520)     | 142.5                              | (129.0 to 168.7)   |



|         |        |                    |        |      |         |                      |        |                   |
|---------|--------|--------------------|--------|------|---------|----------------------|--------|-------------------|
|         |        |                    |        | 2013 | 102     | (62 to 154)          | 6      | (3.7 to 9.2)      |
|         |        |                    | Female | 1990 | 49      | (30 to 72)           | 4.1    | (2.5 to 6.0)      |
|         |        |                    |        | 2013 | 71      | (45 to 105)          | 4      | (2.6 to 5.9)      |
|         |        |                    | Both   | 1990 | 117     | (76 to 166)          | 4.7    | (3.1 to 6.7)      |
|         |        |                    | Both   | 2013 | 174     | (113 to 250)         | 5      | (3.3 to 7.1)      |
| Algeria | Deaths | Ischemic Stroke    | Male   | 1990 | 2,894   | (2,256 to 3,702)     | 89.8   | (70.7 to 113.3)   |
|         |        |                    |        | 2013 | 5,553   | (4,394 to 6,796)     | 69.1   | (55.0 to 84.7)    |
|         |        |                    | Female | 1990 | 3,614   | (2,981 to 4,598)     | 88.1   | (72.2 to 110.3)   |
|         |        |                    |        | 2013 | 6,692   | (5,295 to 8,455)     | 74.1   | (58.0 to 92.8)    |
|         |        |                    | Both   | 1990 | 6,508   | (5,554 to 7,837)     | 88.9   | (76.3 to 105.3)   |
|         |        |                    |        | 2013 | 12,246  | (10,329 to 14,229)   | 71.9   | (60.9 to 83.5)    |
|         | Deaths | Hemorrhagic Stroke | Male   | 1990 | 2,787   | (2,110 to 3,523)     | 60.4   | (43.7 to 78.3)    |
|         |        |                    |        | 2013 | 4,598   | (3,541 to 5,803)     | 46.5   | (35.3 to 59.5)    |
|         |        |                    | Female | 1990 | 3,654   | (2,874 to 4,640)     | 66.3   | (51.3 to 84.1)    |
|         |        |                    |        | 2013 | 5,601   | (4,488 to 7,075)     | 52     | (40.9 to 67.3)    |
|         |        |                    | Both   | 1990 | 6,441   | (5,335 to 7,648)     | 63.5   | (51.9 to 75.5)    |
|         |        |                    |        | 2013 | 10,200  | (8,713 to 12,092)    | 49.3   | (42.0 to 58.8)    |
|         | DALYs  | Ischemic Stroke    | Male   | 1990 | 49,172  | (37,261 to 65,122)   | 1197.6 | (929.4 to 1542.4) |
|         |        |                    |        | 2013 | 85,358  | (65,413 to 105,207)  | 863.8  | (677.0 to 1059.8) |
|         |        |                    | Female | 1990 | 55,823  | (45,248 to 72,912)   | 1131.1 | (928.7 to 1439.8) |
|         |        |                    |        | 2013 | 93,596  | (73,485 to 118,906)  | 888.1  | (702.7 to 1118.5) |
|         |        |                    | Both   | 1990 | 104,996 | (88,708 to 131,084)  | 1161.4 | (986.5 to 1409.6) |
|         |        |                    |        | 2013 | 178,955 | (149,241 to 210,402) | 877.7  | (739.2 to 1023.1) |
|         |        | Hemorrhagic Stroke | Male   | 1990 | 92,471  | (70,903 to 118,982)  | 1220.9 | (925.5 to 1555.3) |

|         |         |                    |        | 2013 | 112,617          | (86,919 to 142,811)  | 842.6                              | (653.8 to 1055.8)  |
|---------|---------|--------------------|--------|------|------------------|----------------------|------------------------------------|--------------------|
|         |         |                    | Female | 1990 | 115,984          | (87,426 to 157,031)  | 1402                               | (1087.2 to 1779.8) |
|         |         |                    |        | 2013 | 132,233          | (106,682 to 167,875) | 957.4                              | (771.5 to 1222.5)  |
|         |         |                    | Both   | 1990 | 208,456          | (169,268 to 251,244) | 1313.3                             | (1082.1 to 1568.7) |
|         |         |                    |        |      | Counts, All ages |                      | Rate per 100,000, Age-standardized |                    |
| Country | measure | Stroke Type        | sex    | year | Mean             | 95% UI               | Mean                               | 95% UI             |
|         |         |                    |        | 2013 | 244,851          | (207,936 to 291,375) | 900.5                              | (770.2 to 1064.9)  |
|         | YLDs    | Ischemic Stroke    | Male   | 1990 | 524              | (343 to 745)         | 9.3                                | (6.1 to 13.2)      |
|         |         |                    |        | 2013 | 1,371            | (856 to 1,939)       | 10.3                               | (6.6 to 14.6)      |
|         |         |                    | Female | 1990 | 485              | (323 to 695)         | 7.9                                | (5.2 to 11.3)      |
|         |         |                    |        | 2013 | 1,022            | (656 to 1,446)       | 7.6                                | (5.0 to 10.7)      |
|         |         |                    | Both   | 1990 | 1,010            | (686 to 1,390)       | 8.6                                | (5.8 to 11.7)      |
|         |         |                    |        | 2013 | 2,393            | (1,580 to 3,262)     | 8.9                                | (5.9 to 12.3)      |
|         |         | Hemorrhagic Stroke | Male   | 1990 | 89               | (53 to 139)          | 1.3                                | (0.8 to 2.1)       |
|         |         |                    |        | 2013 | 178              | (103 to 284)         | 1.2                                | (0.7 to 2.0)       |
|         |         |                    | Female | 1990 | 95               | (55 to 147)          | 1.4                                | (0.8 to 2.1)       |
|         |         |                    |        | 2013 | 183              | (109 to 279)         | 1.3                                | (0.8 to 1.9)       |
|         |         |                    | Both   | 1990 | 184              | (116 to 264)         | 1.3                                | (0.8 to 1.9)       |
|         |         |                    | Both   | 2013 | 361              | (228 to 528)         | 1.2                                | (0.8 to 1.8)       |
| Andorra | Deaths  | Ischemic Stroke    | Male   | 1990 | 12               | (8 to 17)            | 47.7                               | (33.6 to 67.0)     |
|         |         |                    |        | 2013 | 18               | (13 to 26)           | 29.3                               | (20.4 to 41.4)     |

|         |         |                    |        |      |      |              |                                         |                  |
|---------|---------|--------------------|--------|------|------|--------------|-----------------------------------------|------------------|
|         |         |                    | Female | 1990 | 21   | (13 to 29)   | 41.8                                    | (26.6 to 57.9)   |
|         |         |                    |        | 2013 | 29   | (17 to 44)   | 25.7                                    | (15.3 to 38.9)   |
|         |         |                    | Both   | 1990 | 33   | (25 to 43)   | 44.5                                    | (33.9 to 56.8)   |
|         |         |                    |        | 2013 | 48   | (35 to 65)   | 27.5                                    | (20.3 to 37.0)   |
|         | Deaths  | Hemorrhagic Stroke | Male   | 1990 | 6    | (3 to 10)    | 25.6                                    | (14.6 to 40.1)   |
|         |         |                    |        | 2013 | 11   | (6 to 16)    | 17.9                                    | (10.7 to 26.3)   |
|         |         |                    | Female | 1990 | 10   | (4 to 15)    | 21                                      | (10.4 to 32.5)   |
|         |         |                    |        | 2013 | 15   | (7 to 24)    | 14.5                                    | (7.4 to 23.5)    |
|         |         |                    | Both   | 1990 | 16   | (9 to 23)    | 23.1                                    | (13.7 to 32.4)   |
|         |         |                    |        | 2013 | 26   | (17 to 37)   | 16.1                                    | (10.4 to 22.3)   |
|         | DALYs   | Ischemic Stroke    | Male   | 1990 | 166  | (119 to 227) | 615.5                                   | (442.1 to 842.3) |
|         |         |                    |        | 2013 | 225  | (165 to 301) | 365.4                                   | (269.0 to 487.8) |
|         |         |                    | Female | 1990 | 194  | (130 to 262) | 415.2                                   | (279.7 to 566.5) |
|         |         |                    |        | 2013 | 232  | (151 to 338) | 241.9                                   | (159.0 to 351.2) |
|         |         |                    | Both   | 1990 | 361  | (284 to 457) | 499.2                                   | (391.1 to 634.5) |
|         |         |                    |        | 2013 | 458  | (357 to 603) | 297.2                                   | (231.9 to 389.8) |
|         |         | Hemorrhagic Stroke | Male   | 1990 | 116  | (71 to 177)  | 423.6                                   | (259.6 to 641.6) |
|         |         |                    |        | 2013 | 152  | (91 to 225)  | 262.9                                   | (159.8 to 391.8) |
|         |         |                    | Female | 1990 | 111  | (57 to 167)  | 275.7                                   | (143.5 to 408.5) |
|         |         |                    |        | 2013 | 133  | (74 to 208)  | 164.4                                   | (93.5 to 248.3)  |
|         |         |                    | Both   | 1990 | 228  | (145 to 306) | 342.2                                   | (221.8 to 462.5) |
| Country | measure | Stroke Type        | sex    | year | Mean | 95% UI       | Rate per 100,000, Age-standardized Mean | 95% UI           |

|        |        |                    |        |      |        |                    |        |                    |
|--------|--------|--------------------|--------|------|--------|--------------------|--------|--------------------|
|        |        |                    |        | 2013 | 286    | (194 to 380)       | 210.3  | (146.2 to 278.6)   |
|        | YLDs   | Ischemic Stroke    | Male   | 1990 | 25     | (16 to 35)         | 91.7   | (60.6 to 125.6)    |
|        |        |                    |        | 2013 | 49     | (32 to 69)         | 85.2   | (55.8 to 118.2)    |
|        |        |                    | Female | 1990 | 26     | (16 to 37)         | 64.7   | (41.2 to 94.1)     |
|        |        |                    |        | 2013 | 44     | (28 to 61)         | 59.4   | (38.4 to 82.1)     |
|        |        |                    | Both   | 1990 | 51     | (34 to 70)         | 76     | (51.1 to 103.4)    |
|        |        |                    |        | 2013 | 94     | (63 to 127)        | 71.2   | (47.8 to 95.8)     |
|        |        | Hemorrhagic Stroke | Male   | 1990 | 5      | (2 to 9)           | 19.1   | (9.7 to 32.8)      |
|        |        |                    |        | 2013 | 10     | (5 to 18)          | 17.7   | (9.6 to 31.5)      |
|        |        |                    | Female | 1990 | 4      | (2 to 7)           | 12.5   | (7.0 to 20.1)      |
|        |        |                    |        | 2013 | 9      | (4 to 16)          | 13.5   | (7.2 to 23.2)      |
|        |        |                    | Both   | 1990 | 9      | (5 to 14)          | 15.2   | (9.3 to 22.6)      |
|        |        |                    | Both   | 2013 | 19     | (11 to 29)         | 15.4   | (9.5 to 22.9)      |
| Angola | Deaths | Ischemic Stroke    | Male   | 1990 | 1,296  | (756 to 1,904)     | 109.6  | (65.5 to 159.5)    |
|        |        |                    |        | 2013 | 2,352  | (1,552 to 3,563)   | 106.5  | (69.8 to 154.4)    |
|        |        |                    | Female | 1990 | 1,431  | (854 to 2,144)     | 109.3  | (67.2 to 156.5)    |
|        |        |                    |        | 2013 | 2,851  | (1,925 to 4,327)   | 112.8  | (79.1 to 167.9)    |
|        |        |                    | Both   | 1990 | 2,727  | (1,722 to 3,943)   | 110.2  | (72.4 to 155.1)    |
|        |        |                    |        | 2013 | 5,204  | (3,778 to 7,794)   | 110.6  | (82.3 to 159.3)    |
|        | Deaths | Hemorrhagic Stroke | Male   | 1990 | 1,792  | (1,080 to 2,578)   | 105    | (59.3 to 151.4)    |
|        |        |                    |        | 2013 | 2,885  | (1,974 to 4,429)   | 91.1   | (58.5 to 136.3)    |
|        |        |                    | Female | 1990 | 2,083  | (1,282 to 3,179)   | 115.1  | (71.7 to 173.9)    |
|        |        |                    |        | 2013 | 3,329  | (2,095 to 5,268)   | 98     | (61.0 to 154.4)    |
|        |        |                    | Both   | 1990 | 3,875  | (2,466 to 5,588)   | 111.4  | (70.9 to 158.6)    |
|        |        |                    |        | 2013 | 6,214  | (4,254 to 9,353)   | 95.3   | (63.7 to 142.1)    |
|        | DALYs  | Ischemic Stroke    | Male   | 1990 | 31,048 | (17,701 to 47,645) | 1842.1 | (1062.9 to 2697.6) |
|        |        |                    |        | 2013 | 50,669 | (32,996 to 78,962) | 1645.8 | (1080.7 to 2498.2) |

|                  |         |                    | Female | 1990 | 28,504  | (15,743 to 46,315)   | 1593.9                             | (952.2 to 2384.1)  |
|------------------|---------|--------------------|--------|------|---------|----------------------|------------------------------------|--------------------|
|                  |         |                    |        | 2013 | 51,370  | (33,383 to 82,521)   | 1559.1                             | (1044.9 to 2381.9) |
|                  |         |                    | Both   | 1990 | 59,552  | (36,912 to 86,597)   | 1716.6                             | (1086.9 to 2471.6) |
|                  |         |                    |        | 2013 | 102,039 | (71,527 to 155,613)  | 1606                               | (1162.6 to 2417.7) |
|                  |         | Hemorrhagic Stroke | Male   | 1990 | 59,406  | (36,375 to 84,682)   | 2440.5                             | (1441.2 to 3521.6) |
|                  |         |                    |        | 2013 | 90,628  | (63,322 to 136,738)  | 1968.2                             | (1336.3 to 3046.6) |
|                  |         |                    | Female | 1990 | 60,851  | (35,988 to 92,656)   | 2389.9                             | (1457.6 to 3653.9) |
|                  |         |                    |        | 2013 | 91,211  | (57,339 to 146,727)  | 1928.1                             | (1205.0 to 3082.8) |
| Counts, All ages |         |                    |        |      |         |                      | Rate per 100,000, Age-standardized |                    |
| Country          | measure | Stroke Type        | sex    | year | Mean    | 95% UI               | Mean                               | 95% UI             |
|                  |         |                    | Both   | 1990 | 120,258 | (78,496 to 170,460)  | 2425.4                             | (1525.0 to 3506.0) |
|                  |         |                    |        | 2013 | 181,840 | (126,699 to 272,666) | 1954.2                             | (1329.8 to 2973.6) |
|                  | YLDs    | Ischemic Stroke    | Male   | 1990 | 278     | (176 to 412)         | 14.1                               | (9.0 to 20.6)      |
|                  |         |                    |        | 2013 | 568     | (367 to 812)         | 14.2                               | (9.3 to 20.1)      |
|                  |         |                    | Female | 1990 | 239     | (152 to 337)         | 10.6                               | (6.8 to 14.9)      |
|                  |         |                    |        | 2013 | 533     | (351 to 765)         | 11.9                               | (7.7 to 17.1)      |
|                  |         |                    | Both   | 1990 | 517     | (341 to 725)         | 12.1                               | (8.0 to 16.8)      |
|                  |         |                    |        | 2013 | 1,102   | (746 to 1,526)       | 13                                 | (8.8 to 17.8)      |
|                  |         | Hemorrhagic Stroke | Male   | 1990 | 86      | (55 to 126)          | 3.6                                | (2.3 to 5.2)       |
|                  |         |                    |        | 2013 | 187     | (114 to 275)         | 3.7                                | (2.3 to 5.4)       |

|                     |        |                    |        |      |     |              |        |                    |
|---------------------|--------|--------------------|--------|------|-----|--------------|--------|--------------------|
|                     |        |                    | Female | 1990 | 69  | (42 to 102)  | 2.6    | (1.6 to 3.7)       |
|                     |        |                    |        | 2013 | 142 | (89 to 207)  | 2.7    | (1.7 to 3.9)       |
|                     |        |                    | Both   | 1990 | 155 | (103 to 220) | 3      | (2.0 to 4.3)       |
|                     |        |                    | Both   | 2013 | 329 | (212 to 461) | 3.1    | (2.0 to 4.4)       |
| Antigua and Barbuda | Deaths | Ischemic Stroke    | Male   | 1990 | 18  | (15 to 22)   | 98.3   | (79.2 to 117.9)    |
|                     |        |                    |        | 2013 | 20  | (14 to 26)   | 71.4   | (52.7 to 92.8)     |
|                     |        |                    | Female | 1990 | 27  | (20 to 31)   | 94.7   | (70.2 to 108.9)    |
|                     |        |                    |        | 2013 | 23  | (17 to 33)   | 58.1   | (42.6 to 82.1)     |
|                     |        |                    | Both   | 1990 | 46  | (37 to 52)   | 97.5   | (79.4 to 110.0)    |
|                     |        |                    |        | 2013 | 43  | (35 to 54)   | 64.2   | (51.5 to 80.6)     |
|                     | Deaths | Hemorrhagic Stroke | Male   | 1990 | 9   | (7 to 12)    | 47.1   | (36.3 to 62.9)     |
|                     |        |                    |        | 2013 | 13  | (8 to 18)    | 42.7   | (28.6 to 58.2)     |
|                     |        |                    | Female | 1990 | 13  | (10 to 17)   | 49.8   | (36.3 to 62.1)     |
|                     |        |                    |        | 2013 | 14  | (10 to 20)   | 35.5   | (25.2 to 50.5)     |
|                     |        |                    | Both   | 1990 | 23  | (19 to 28)   | 49.4   | (41.2 to 59.7)     |
|                     |        |                    |        | 2013 | 27  | (22 to 34)   | 38.9   | (30.8 to 48.7)     |
|                     | DALYs  | Ischemic Stroke    | Male   | 1990 | 328 | (267 to 394) | 1598.2 | (1300.6 to 1907.0) |
|                     |        |                    |        | 2013 | 354 | (259 to 475) | 1115.7 | (818.6 to 1473.4)  |
|                     |        |                    | Female | 1990 | 370 | (269 to 427) | 1310.5 | (959.5 to 1519.5)  |
|                     |        |                    |        | 2013 | 309 | (221 to 438) | 767.8  | (547.1 to 1088.7)  |
|                     |        |                    | Both   | 1990 | 698 | (575 to 785) | 1448   | (1193.3 to 1629.5) |
|                     |        |                    |        | 2013 | 664 | (533 to 830) | 927.1  | (745.5 to 1155.7)  |
|                     |        | Hemorrhagic Stroke | Male   | 1990 | 219 | (173 to 285) | 1004.9 | (794.8 to 1316.0)  |
|                     |        |                    |        | 2013 | 307 | (206 to 430) | 844.6  | (574.2 to 1163.2)  |
|                     |        |                    | Female | 1990 | 249 | (187 to 305) | 921.5  | (693.3 to 1132.8)  |
|                     |        |                    |        | 2013 | 265 | (184 to 389) | 617.3  | (431.1 to 904.1)   |



| Country   | measure | Stroke Type        | sex    | year | Counts, All ages |                    | Rate per 100,000, Age-standardized |                   |
|-----------|---------|--------------------|--------|------|------------------|--------------------|------------------------------------|-------------------|
|           |         |                    |        |      | Mean             | 95% UI             | Mean                               | 95% UI            |
|           |         |                    | Both   | 1990 | 468              | (400 to 555)       | 966.8                              | (830.1 to 1147.9) |
|           |         |                    |        | 2013 | 573              | (445 to 721)       | 722.9                              | (566.3 to 911.0)  |
|           | YLDs    | Ischemic Stroke    | Male   | 1990 | 9                | (5 to 13)          | 45.7                               | (28.9 to 65.5)    |
|           |         |                    |        | 2013 | 13               | (8 to 19)          | 42.8                               | (27.3 to 60.5)    |
|           |         |                    | Female | 1990 | 9                | (5 to 12)          | 32.5                               | (21.5 to 45.8)    |
|           |         |                    |        | 2013 | 13               | (8 to 19)          | 31.9                               | (20.6 to 47.1)    |
|           |         |                    | Both   | 1990 | 18               | (12 to 25)         | 38.1                               | (25.7 to 52.3)    |
|           |         |                    |        | 2013 | 26               | (17 to 37)         | 36.7                               | (24.0 to 51.5)    |
|           |         | Hemorrhagic Stroke | Male   | 1990 | 3                | (1 to 4)           | 14.4                               | (8.8 to 21.4)     |
|           |         |                    |        | 2013 | 5                | (3 to 8)           | 14.7                               | (8.5 to 23.9)     |
|           |         |                    | Female | 1990 | 2                | (1 to 4)           | 10.6                               | (6.4 to 15.7)     |
|           |         |                    |        | 2013 | 4                | (2 to 6)           | 10.2                               | (6.1 to 16.1)     |
|           |         |                    | Both   | 1990 | 5                | (3 to 8)           | 12.3                               | (8.0 to 17.1)     |
|           |         |                    | Both   | 2013 | 9                | (6 to 14)          | 12.2                               | (7.6 to 18.4)     |
| Argentina | Deaths  | Ischemic Stroke    | Male   | 1990 | 8,606            | (6,509 to 10,418)  | 77.1                               | (58.5 to 93.3)    |
|           |         |                    |        | 2013 | 7,588            | (5,954 to 10,483)  | 43.6                               | (34.0 to 59.9)    |
|           |         |                    | Female | 1990 | 10,114           | (6,814 to 11,327)  | 63.3                               | (42.6 to 71.0)    |
|           |         |                    |        | 2013 | 8,355            | (6,237 to 13,796)  | 26.8                               | (20.1 to 44.5)    |
|           |         |                    | Both   | 1990 | 18,720           | (14,179 to 21,349) | 69.6                               | (52.7 to 79.0)    |
|           |         |                    |        | 2013 | 15,944           | (12,773 to 23,071) | 33.5                               | (26.8 to 48.2)    |
|           | Deaths  | Hemorrhagic Stroke | Male   | 1990 | 4,688            | (3,661 to 6,923)   | 37.6                               | (29.3 to 55.8)    |
|           |         |                    |        | 2013 | 7,590            | (5,087 to 9,436)   | 41.4                               | (27.5 to 51.7)    |
|           |         |                    | Female | 1990 | 4,918            | (4,167 to 6,953)   | 30.8                               | (26.1 to 43.3)    |



|         |        |                    |        |      |        |                    |        |                   |
|---------|--------|--------------------|--------|------|--------|--------------------|--------|-------------------|
|         | YLDs   | Ischemic Stroke    | Male   | 1990 | 5,119  | (3,416 to 6,934)   | 38.9   | (26.2 to 52.6)    |
|         |        |                    |        | 2013 | 5,627  | (3,686 to 7,992)   | 29.8   | (19.6 to 42.2)    |
|         |        |                    | Female | 1990 | 3,749  | (2,478 to 5,169)   | 22.8   | (15.1 to 31.4)    |
|         |        |                    |        | 2013 | 4,607  | (2,911 to 6,712)   | 18.7   | (12.0 to 27.4)    |
|         |        |                    | Both   | 1990 | 8,869  | (5,997 to 11,830)  | 30     | (20.4 to 39.9)    |
|         |        |                    |        | 2013 | 10,234 | (6,732 to 14,436)  | 23.5   | (15.5 to 33.2)    |
|         |        | Hemorrhagic Stroke | Male   | 1990 | 1,737  | (1,108 to 2,425)   | 12.8   | (8.2 to 17.9)     |
|         |        |                    |        | 2013 | 2,432  | (1,575 to 3,425)   | 12.6   | (8.1 to 17.8)     |
|         |        |                    | Female | 1990 | 1,059  | (685 to 1,510)     | 6.5    | (4.2 to 9.3)      |
|         |        |                    |        | 2013 | 1,512  | (972 to 2,188)     | 6.4    | (4.1 to 9.2)      |
|         |        |                    | Both   | 1990 | 2,797  | (1,836 to 3,782)   | 9.4    | (6.1 to 12.6)     |
|         |        |                    | Both   | 2013 | 3,944  | (2,651 to 5,465)   | 9.2    | (6.2 to 12.7)     |
| Armenia | Deaths | Ischemic Stroke    | Male   | 1990 | 737    | (539 to 918)       | 94.7   | (70.5 to 117.7)   |
|         |        |                    |        | 2013 | 1,135  | (868 to 1,381)     | 82.2   | (62.6 to 100.0)   |
|         |        |                    | Female | 1990 | 1,090  | (901 to 1,368)     | 85.7   | (71.1 to 106.3)   |
|         |        |                    |        | 2013 | 1,418  | (1,072 to 1,696)   | 68.1   | (51.9 to 81.2)    |
|         |        |                    | Both   | 1990 | 1,827  | (1,536 to 2,162)   | 89.4   | (75.7 to 105.5)   |
|         |        |                    |        | 2013 | 2,554  | (2,104 to 2,902)   | 74.3   | (61.3 to 84.6)    |
|         | Deaths | Hemorrhagic Stroke | Male   | 1990 | 573    | (431 to 769)       | 59.2   | (42.6 to 82.3)    |
|         |        |                    |        | 2013 | 616    | (463 to 790)       | 43.8   | (32.9 to 56.2)    |
|         |        |                    | Female | 1990 | 636    | (459 to 821)       | 45.9   | (32.6 to 60.2)    |
|         |        |                    |        | 2013 | 663    | (521 to 878)       | 34.1   | (26.8 to 45.3)    |
|         |        |                    | Both   | 1990 | 1,210  | (957 to 1,474)     | 51.3   | (39.7 to 63.8)    |
|         |        |                    |        | 2013 | 1,280  | (1,074 to 1,564)   | 38.5   | (32.4 to 46.8)    |
|         | DALYs  | Ischemic Stroke    | Male   | 1990 | 12,369 | (8,785 to 15,498)  | 1327.5 | (966.9 to 1644.9) |
|         |        |                    |        | 2013 | 15,901 | (11,968 to 19,299) | 1119.2 | (839.4 to 1361.2) |
|         |        |                    | Female | 1990 | 14,680 | (11,870 to 18,901) | 1079.6 | (879.3 to 1375.3) |

|                  |         |                    |        | 2013                               | 15,716 | (12,265 to 18,841) | 805.4  | (629.3 to 968.5)  |
|------------------|---------|--------------------|--------|------------------------------------|--------|--------------------|--------|-------------------|
|                  |         |                    | Both   | 1990                               | 27,049 | (22,316 to 32,740) | 1183.3 | (986.0 to 1416.0) |
|                  |         |                    |        | 2013                               | 31,618 | (26,298 to 36,160) | 945.5  | (787.1 to 1079.5) |
| Counts, All ages |         |                    |        |                                    |        |                    |        |                   |
|                  |         |                    |        | Rate per 100,000, Age-standardized |        |                    |        |                   |
| Country          | measure | Stroke Type        | sex    | year                               | Mean   | 95% UI             | Mean   | 95% UI            |
|                  |         | Hemorrhagic Stroke | Male   | 1990                               | 13,649 | (10,640 to 17,826) | 1152.8 | (872.1 to 1515.1) |
|                  |         |                    |        | 2013                               | 12,254 | (9,438 to 15,499)  | 835.7  | (635.3 to 1050.5) |
|                  |         |                    | Female | 1990                               | 12,519 | (9,437 to 15,916)  | 827.1  | (624.1 to 1054.4) |
|                  |         |                    |        | 2013                               | 10,558 | (8,316 to 13,743)  | 587.5  | (465.1 to 768.8)  |
|                  |         |                    | Both   | 1990                               | 26,168 | (21,704 to 31,014) | 966.4  | (791.4 to 1159.8) |
|                  |         |                    |        | 2013                               | 22,813 | (19,453 to 27,111) | 702.3  | (600.6 to 832.6)  |
|                  | YLDs    | Ischemic Stroke    | Male   | 1990                               | 96     | (60 to 144)        | 8      | (5.1 to 11.7)     |
|                  |         |                    |        | 2013                               | 128    | (80 to 184)        | 8.7    | (5.4 to 12.5)     |
|                  |         |                    | Female | 1990                               | 122    | (75 to 180)        | 8.1    | (5.0 to 12.0)     |
|                  |         |                    |        | 2013                               | 142    | (91 to 203)        | 8      | (5.1 to 11.4)     |
|                  |         |                    | Both   | 1990                               | 219    | (144 to 304)       | 8.1    | (5.4 to 11.3)     |
|                  |         |                    |        | 2013                               | 270    | (179 to 377)       | 8.3    | (5.5 to 11.5)     |
|                  |         | Hemorrhagic Stroke | Male   | 1990                               | 102    | (63 to 150)        | 7.6    | (4.8 to 11.2)     |
|                  |         |                    |        | 2013                               | 118    | (71 to 171)        | 7.8    | (4.7 to 11.3)     |
|                  |         |                    | Female | 1990                               | 72     | (44 to 107)        | 4.5    | (2.8 to 6.8)      |
|                  |         |                    |        | 2013                               | 84     | (52 to 123)        | 4.9    | (3.1 to 7.1)      |
|                  |         |                    | Both   | 1990                               | 174    | (113 to 244)       | 5.9    | (3.9 to 8.3)      |
|                  |         |                    | Both   | 2013                               | 202    | (131 to 284)       | 6.2    | (4.0 to 8.8)      |
| Australia        | Deaths  | Ischemic Stroke    | Male   | 1990                               | 3,265  | (2,625 to 4,025)   | 49.2   | (39.6 to 60.6)    |
|                  |         |                    |        | 2013                               | 3,889  | (2,926 to 4,913)   | 24.1   | (18.2 to 30.4)    |

|         |         |                    |        |      |        |                     |       |                                    |
|---------|---------|--------------------|--------|------|--------|---------------------|-------|------------------------------------|
|         |         |                    | Female | 1990 | 5,007  | (3,860 to 5,815)    | 45.3  | (34.8 to 52.6)                     |
|         |         |                    |        | 2013 | 6,022  | (4,737 to 8,314)    | 25.9  | (20.5 to 36.0)                     |
|         |         |                    | Both   | 1990 | 8,273  | (7,031 to 9,258)    | 47.4  | (40.2 to 53.1)                     |
|         |         |                    |        | 2013 | 9,911  | (8,170 to 12,548)   | 25.3  | (21.1 to 31.9)                     |
|         | Deaths  | Hemorrhagic Stroke | Male   | 1990 | 1,736  | (1,374 to 2,391)    | 22.9  | (18.0 to 32.6)                     |
|         |         |                    |        | 2013 | 2,088  | (1,279 to 2,722)    | 13.4  | (8.2 to 17.4)                      |
|         |         |                    | Female | 1990 | 2,221  | (1,768 to 3,112)    | 21.4  | (17.1 to 29.6)                     |
|         |         |                    |        | 2013 | 2,633  | (1,763 to 3,433)    | 12.9  | (9.1 to 16.7)                      |
|         |         |                    | Both   | 1990 | 3,957  | (3,444 to 5,152)    | 22.2  | (19.3 to 28.9)                     |
|         |         |                    |        | 2013 | 4,721  | (3,352 to 5,713)    | 13.2  | (9.5 to 15.8)                      |
|         | DALYs   | Ischemic Stroke    | Male   | 1990 | 45,290 | (37,617 to 55,492)  | 614.5 | (507.2 to 745.4)                   |
|         |         |                    |        | 2013 | 44,359 | (34,329 to 54,087)  | 287.6 | (222.6 to 349.7)                   |
|         |         |                    | Female | 1990 | 48,775 | (38,357 to 55,777)  | 451.3 | (355.5 to 514.6)                   |
|         |         |                    |        | 2013 | 47,637 | (39,309 to 64,337)  | 234   | (194.7 to 316.9)                   |
|         |         |                    | Both   | 1990 | 94,066 | (81,914 to 105,700) | 524.5 | (456.9 to 587.6)                   |
|         |         |                    |        | 2013 | 91,996 | (78,873 to 112,054) | 260.3 | (222.7 to 316.6)                   |
|         |         |                    |        |      |        | Counts, All ages    |       | Rate per 100,000, Age-standardized |
| Country | measure | Stroke Type        | sex    | year | Mean   | 95% UI              | Mean  | 95% UI                             |
|         |         | Hemorrhagic Stroke | Male   | 1990 | 36,484 | (29,440 to 48,697)  | 439.5 | (356.6 to 592.0)                   |
|         |         |                    |        | 2013 | 33,491 | (22,164 to 41,519)  | 226.1 | (151.1 to 280.5)                   |
|         |         |                    | Female | 1990 | 36,716 | (29,819 to 48,065)  | 378.7 | (304.2 to 495.2)                   |
|         |         |                    |        | 2013 | 33,136 | (24,978 to 42,148)  | 197.1 | (147.3 to 251.0)                   |
|         |         |                    | Both   | 1990 | 73,200 | (64,380 to 90,778)  | 407.4 | (358.5 to 506.5)                   |

|         |        |                    |        |      |        |                    |       |                   |
|---------|--------|--------------------|--------|------|--------|--------------------|-------|-------------------|
|         |        |                    |        | 2013 | 66,627 | (50,267 to 77,565) | 211.1 | (160.8 to 245.0)  |
|         | YLDs   | Ischemic Stroke    | Male   | 1990 | 4,968  | (3,365 to 6,924)   | 61.2  | (41.3 to 85.4)    |
|         |        |                    |        | 2013 | 9,037  | (6,032 to 12,413)  | 60.6  | (40.4 to 83.2)    |
|         |        |                    | Female | 1990 | 3,992  | (2,704 to 5,657)   | 40.3  | (27.3 to 57.0)    |
|         |        |                    |        | 2013 | 6,474  | (4,282 to 8,842)   | 38.9  | (25.4 to 53.4)    |
|         |        |                    | Both   | 1990 | 8,960  | (6,249 to 12,189)  | 49.7  | (34.7 to 67.6)    |
|         |        |                    |        | 2013 | 15,512 | (10,827 to 20,711) | 49.2  | (34.1 to 66.0)    |
|         |        | Hemorrhagic Stroke | Male   | 1990 | 1,346  | (872 to 1,956)     | 16.2  | (10.4 to 23.4)    |
|         |        |                    |        | 2013 | 2,333  | (1,521 to 3,227)   | 16.1  | (10.4 to 22.4)    |
|         |        |                    | Female | 1990 | 1,094  | (729 to 1,553)     | 11.4  | (7.7 to 16.2)     |
|         |        |                    |        | 2013 | 1,828  | (1,150 to 2,628)   | 11.7  | (7.3 to 16.6)     |
|         |        |                    | Both   | 1990 | 2,440  | (1,652 to 3,428)   | 13.6  | (9.2 to 19.1)     |
|         |        |                    | Both   | 2013 | 4,161  | (2,824 to 5,612)   | 13.8  | (9.3 to 18.5)     |
| Austria | Deaths | Ischemic Stroke    | Male   | 1990 | 2,474  | (1,971 to 3,025)   | 65.2  | (51.8 to 79.3)    |
|         |        |                    |        | 2013 | 1,829  | (1,335 to 2,305)   | 27.3  | (19.9 to 34.4)    |
|         |        |                    | Female | 1990 | 4,965  | (3,521 to 5,607)   | 59.1  | (41.8 to 66.4)    |
|         |        |                    |        | 2013 | 3,037  | (2,219 to 5,004)   | 25.3  | (18.7 to 41.3)    |
|         |        |                    | Both   | 1990 | 7,440  | (5,908 to 8,303)   | 61.7  | (49.2 to 68.8)    |
|         |        |                    |        | 2013 | 4,866  | (3,851 to 6,905)   | 26.5  | (21.0 to 37.2)    |
|         | Deaths | Hemorrhagic Stroke | Male   | 1990 | 1,202  | (935 to 1,582)     | 30.8  | (23.8 to 40.6)    |
|         |        |                    |        | 2013 | 1,181  | (750 to 1,627)     | 18.2  | (11.6 to 24.7)    |
|         |        |                    | Female | 1990 | 2,095  | (1,500 to 2,645)   | 27.6  | (20.2 to 34.8)    |
|         |        |                    |        | 2013 | 1,575  | (1,171 to 2,476)   | 14.9  | (11.4 to 22.4)    |
|         |        |                    | Both   | 1990 | 3,297  | (2,717 to 4,065)   | 29    | (24.2 to 35.8)    |
|         |        |                    |        | 2013 | 2,756  | (2,192 to 3,683)   | 16.4  | (13.3 to 21.6)    |
|         | DALYs  | Ischemic Stroke    | Male   | 1990 | 34,786 | (28,410 to 41,379) | 891.1 | (728.3 to 1058.7) |
|         |        |                    |        | 2013 | 25,948 | (20,130 to 31,777) | 395.3 | (306.3 to 482.4)  |

|            |         |                    | Female | 1990 | 52,020           | (37,854 to 58,086) | 678.8                              | (494.9 to 759.8) |
|------------|---------|--------------------|--------|------|------------------|--------------------|------------------------------------|------------------|
|            |         |                    |        | 2013 | 28,404           | (21,874 to 43,552) | 280.4                              | (218.1 to 426.5) |
|            |         |                    | Both   | 1990 | 86,806           | (71,470 to 96,451) | 763.7                              | (630.2 to 850.0) |
|            |         |                    |        | 2013 | 54,353           | (44,322 to 70,600) | 333.4                              | (271.5 to 428.8) |
|            |         | Hemorrhagic Stroke | Male   | 1990 | 22,350           | (17,731 to 28,599) | 556.7                              | (441.5 to 714.8) |
|            |         |                    |        |      |                  |                    |                                    |                  |
|            |         |                    |        |      | Counts, All ages |                    | Rate per 100,000, Age-standardized |                  |
| Country    | measure | Stroke Type        | sex    | year | Mean             | 95% UI             | Mean                               | 95% UI           |
|            |         |                    |        | 2013 | 18,425           | (12,550 to 23,563) | 297.3                              | (202.5 to 379.2) |
|            |         |                    | Female | 1990 | 28,414           | (21,480 to 34,819) | 447.6                              | (346.9 to 541.8) |
|            |         |                    |        | 2013 | 17,708           | (14,141 to 25,700) | 215.7                              | (175.6 to 304.0) |
|            |         |                    | Both   | 1990 | 50,765           | (43,818 to 60,746) | 494.5                              | (432.8 to 592.7) |
|            |         |                    |        | 2013 | 36,134           | (29,889 to 45,325) | 253.3                              | (208.6 to 310.1) |
|            | YLDs    | Ischemic Stroke    | Male   | 1990 | 3,520            | (2,237 to 5,003)   | 88                                 | (56.0 to 125.0)  |
|            |         |                    |        | 2013 | 6,282            | (4,103 to 8,998)   | 98.3                               | (64.5 to 140.4)  |
|            |         |                    | Female | 1990 | 4,112            | (2,754 to 5,755)   | 62.6                               | (41.9 to 87.4)   |
|            |         |                    |        | 2013 | 5,132            | (3,218 to 7,289)   | 61.6                               | (39.5 to 86.5)   |
|            |         |                    | Both   | 1990 | 7,633            | (5,180 to 10,473)  | 72.4                               | (48.9 to 99.6)   |
|            |         |                    |        | 2013 | 11,415           | (7,696 to 15,688)  | 78                                 | (52.7 to 107.1)  |
|            |         | Hemorrhagic Stroke | Male   | 1990 | 731              | (415 to 1,179)     | 18.3                               | (10.4 to 29.5)   |
|            |         |                    |        | 2013 | 1,170            | (588 to 1,935)     | 19                                 | (10.0 to 31.2)   |
|            |         |                    | Female | 1990 | 801              | (395 to 1,460)     | 13.2                               | (7.1 to 22.5)    |
|            |         |                    |        | 2013 | 988              | (544 to 1,591)     | 13.1                               | (7.4 to 20.9)    |
|            |         |                    | Both   | 1990 | 1,532            | (935 to 2,273)     | 15.1                               | (9.4 to 22.2)    |
|            |         |                    | Both   | 2013 | 2,159            | (1,241 to 3,077)   | 15.7                               | (9.2 to 22.3)    |
| Azerbaijan | Deaths  | Ischemic Stroke    | Male   | 1990 | 730              | (535 to 983)       | 66.7                               | (48.1 to 89.7)   |





|         |        |                    |        |      |       |                |       |                   |
|---------|--------|--------------------|--------|------|-------|----------------|-------|-------------------|
|         |        |                    |        |      |       | 125,554)       |       |                   |
|         | YLDs   | Ischemic Stroke    | Male   | 1990 | 151   | (97 to 224)    | 7.9   | (5.0 to 11.4)     |
|         |        |                    |        | 2013 | 296   | (188 to 433)   | 8.4   | (5.4 to 12.2)     |
|         |        |                    | Female | 1990 | 188   | (119 to 271)   | 7.6   | (4.8 to 10.9)     |
|         |        |                    |        | 2013 | 314   | (199 to 453)   | 7.6   | (4.8 to 10.9)     |
|         |        |                    | Both   | 1990 | 340   | (230 to 474)   | 7.7   | (5.2 to 10.7)     |
|         |        |                    |        | 2013 | 610   | (400 to 848)   | 8     | (5.3 to 11.0)     |
|         |        | Hemorrhagic Stroke | Male   | 1990 | 182   | (116 to 260)   | 8     | (5.2 to 11.4)     |
|         |        |                    |        | 2013 | 326   | (202 to 469)   | 8.3   | (5.2 to 11.7)     |
|         |        |                    | Female | 1990 | 125   | (78 to 188)    | 4.6   | (2.9 to 6.9)      |
|         |        |                    |        | 2013 | 211   | (133 to 307)   | 4.8   | (3.1 to 7.0)      |
|         |        |                    | Both   | 1990 | 308   | (204 to 425)   | 6.1   | (4.1 to 8.4)      |
|         |        |                    | Both   | 2013 | 537   | (358 to 760)   | 6.4   | (4.3 to 9.0)      |
| Bahrain | Deaths | Ischemic Stroke    | Male   | 1990 | 36    | (26 to 60)     | 60    | (44.0 to 93.9)    |
|         |        |                    |        | 2013 | 52    | (34 to 71)     | 34.4  | (23.9 to 46.1)    |
|         |        |                    | Female | 1990 | 29    | (22 to 49)     | 63.8  | (49.0 to 104.4)   |
|         |        |                    |        | 2013 | 58    | (42 to 75)     | 44.3  | (32.0 to 56.1)    |
|         |        |                    | Both   | 1990 | 66    | (51 to 100)    | 61.6  | (48.3 to 90.8)    |
|         |        |                    |        | 2013 | 111   | (85 to 137)    | 39.6  | (31.0 to 48.0)    |
|         | Deaths | Hemorrhagic Stroke | Male   | 1990 | 39    | (26 to 53)     | 40.6  | (24.3 to 56.3)    |
|         |        |                    |        | 2013 | 39    | (26 to 56)     | 13.9  | (9.0 to 20.2)     |
|         |        |                    | Female | 1990 | 42    | (29 to 51)     | 58    | (39.1 to 70.7)    |
|         |        |                    |        | 2013 | 41    | (30 to 56)     | 21.1  | (15.5 to 28.9)    |
|         |        |                    | Both   | 1990 | 81    | (61 to 98)     | 48.2  | (33.8 to 58.7)    |
|         |        |                    |        | 2013 | 80    | (64 to 100)    | 17.4  | (13.6 to 22.2)    |
|         | DALYs  | Ischemic Stroke    | Male   | 1990 | 742   | (511 to 1,347) | 849.2 | (603.5 to 1368.7) |
|         |        |                    |        | 2013 | 1,084 | (669 to 1,492) | 425.1 | (286.5 to 575.6)  |





|          |        |                    |        |      |           |                          |        |                    |
|----------|--------|--------------------|--------|------|-----------|--------------------------|--------|--------------------|
|          |        | Hemorrhagic Stroke | Male   | 1990 | 387,461   | (238,275 to 533,037)     | 1335.5 | (771.1 to 1887.9)  |
|          |        |                    |        | 2013 | 993,527   | (664,068 to 1,585,407)   | 1979   | (1301.9 to 3255.3) |
|          |        |                    | Female | 1990 | 381,644   | (272,413 to 583,282)     | 1598.6 | (1137.7 to 2447.9) |
|          |        |                    |        | 2013 | 1,042,594 | (547,777 to 1,479,916)   | 2337   | (1249.6 to 3302.4) |
|          |        |                    | Both   | 1990 | 769,105   | (596,039 to 991,699)     | 1456.3 | (1100.2 to 1904.5) |
|          |        |                    |        | 2013 | 2,036,122 | (1,345,715 to 2,679,184) | 2148.1 | (1417.3 to 2858.3) |
|          | YLDs   | Ischemic Stroke    | Male   | 1990 | 8,097     | (5,146 to 11,417)        | 28.5   | (17.8 to 40.3)     |
|          |        |                    |        | 2013 | 15,160    | (9,659 to 21,772)        | 29.6   | (19.0 to 42.3)     |
|          |        |                    | Female | 1990 | 5,964     | (3,993 to 8,498)         | 24.1   | (16.2 to 34.0)     |
|          |        |                    |        | 2013 | 12,378    | (8,037 to 17,566)        | 25.9   | (17.0 to 36.8)     |
|          |        |                    | Both   | 1990 | 14,061    | (9,589 to 18,875)        | 26.5   | (17.9 to 35.8)     |
|          |        |                    |        | 2013 | 27,538    | (18,423 to 37,706)       | 27.8   | (18.8 to 38.1)     |
|          |        | Hemorrhagic Stroke | Male   | 1990 | 4,422     | (2,799 to 6,243)         | 14.4   | (9.1 to 20.3)      |
|          |        |                    |        | 2013 | 7,880     | (4,856 to 11,014)        | 14.3   | (9.0 to 20.2)      |
|          |        |                    | Female | 1990 | 2,922     | (1,904 to 4,106)         | 10.7   | (6.9 to 15.0)      |
|          |        |                    |        | 2013 | 5,692     | (3,650 to 8,161)         | 10.8   | (7.0 to 15.5)      |
|          |        |                    | Both   | 1990 | 7,344     | (4,780 to 9,959)         | 12.7   | (8.3 to 17.2)      |
|          |        |                    | Both   | 2013 | 13,573    | (8,850 to 18,496)        | 12.6   | (8.3 to 17.2)      |
| Barbados | Deaths | Ischemic Stroke    | Male   | 1990 | 85        | (71 to 102)              | 88.3   | (73.9 to 106.3)    |
|          |        |                    |        | 2013 | 77        | (57 to 100)              | 61.2   | (45.2 to 79.1)     |
|          |        |                    | Female | 1990 | 147       | (112 to 173)             | 89.3   | (68.2 to 104.7)    |
|          |        |                    |        | 2013 | 112       | (82 to 166)              | 58.3   | (42.9 to 86.1)     |
|          |        |                    | Both   | 1990 | 232       | (195 to 262)             | 89.8   | (75.3 to 101.3)    |



|         |        |                    |        |      |         |                      |        |                    |
|---------|--------|--------------------|--------|------|---------|----------------------|--------|--------------------|
|         |        |                    | Both   | 1990 | 92      | (63 to 124)          | 37.6   | (25.4 to 50.4)     |
|         |        |                    |        | 2013 | 122     | (84 to 164)          | 37.5   | (25.7 to 50.3)     |
|         |        | Hemorrhagic Stroke | Male   | 1990 | 14      | (8 to 20)            | 14.3   | (8.8 to 20.6)      |
|         |        |                    |        | 2013 | 20      | (12 to 32)           | 13.6   | (8.3 to 21.0)      |
|         |        |                    | Female | 1990 | 14      | (8 to 20)            | 9.9    | (5.8 to 14.6)      |
|         |        |                    |        | 2013 | 19      | (12 to 29)           | 10.9   | (6.7 to 16.1)      |
|         |        |                    | Both   | 1990 | 28      | (18 to 39)           | 11.7   | (7.7 to 16.3)      |
|         |        |                    | Both   | 2013 | 40      | (26 to 58)           | 12.1   | (7.9 to 17.5)      |
| Belarus | Deaths | Ischemic Stroke    | Male   | 1990 | 4,160   | (3,218 to 5,187)     | 120.1  | (95.1 to 147.8)    |
|         |        |                    |        | 2013 | 6,008   | (4,857 to 7,632)     | 131.1  | (106.5 to 163.7)   |
|         |        |                    | Female | 1990 | 7,908   | (6,464 to 9,686)     | 102.2  | (83.3 to 125.3)    |
|         |        |                    |        | 2013 | 10,632  | (8,378 to 12,627)    | 101.4  | (81.3 to 120.9)    |
|         |        |                    | Both   | 1990 | 12,069  | (10,546 to 14,231)   | 109    | (95.6 to 128.2)    |
|         |        |                    |        | 2013 | 16,640  | (14,442 to 19,185)   | 114    | (98.8 to 131.9)    |
|         | Deaths | Hemorrhagic Stroke | Male   | 1990 | 2,186   | (1,341 to 3,083)     | 52.4   | (31.2 to 75.3)     |
|         |        |                    |        | 2013 | 2,567   | (1,788 to 3,445)     | 50.4   | (34.8 to 67.2)     |
|         |        |                    | Female | 1990 | 2,883   | (1,639 to 4,001)     | 39.1   | (22.6 to 53.8)     |
|         |        |                    |        | 2013 | 3,066   | (2,209 to 4,057)     | 34.4   | (25.6 to 45.4)     |
|         |        |                    | Both   | 1990 | 5,070   | (3,198 to 6,388)     | 44.5   | (28.0 to 55.8)     |
|         |        |                    |        | 2013 | 5,634   | (4,502 to 7,000)     | 41.4   | (33.1 to 51.5)     |
|         | DALYs  | Ischemic Stroke    | Male   | 1990 | 75,232  | (55,640 to 96,493)   | 1900.2 | (1449.5 to 2387.8) |
|         |        |                    |        | 2013 | 109,927 | (87,588 to 143,250)  | 2217.5 | (1778.3 to 2881.6) |
|         |        |                    | Female | 1990 | 104,828 | (82,955 to 131,363)  | 1396.6 | (1096.6 to 1752.9) |
|         |        |                    |        | 2013 | 126,723 | (104,123 to 153,003) | 1341.4 | (1111.2 to 1628.9) |

| Country | measure | Stroke Type        | sex    | year | Counts, All ages |                      | Rate per 100,000, Age-standardized |                    |
|---------|---------|--------------------|--------|------|------------------|----------------------|------------------------------------|--------------------|
|         |         |                    |        |      | Mean             | 95% UI               | Mean                               | 95% UI             |
|         |         |                    | Both   | 1990 | 180,061          | (153,863 to 219,533) | 1590.5                             | (1369.2 to 1928.3) |
|         |         |                    |        | 2013 | 236,651          | (205,476 to 284,826) | 1698.2                             | (1474.3 to 2049.3) |
|         |         | Hemorrhagic Stroke | Male   | 1990 | 56,576           | (36,989 to 77,734)   | 1219.1                             | (785.3 to 1692.2)  |
|         |         |                    |        | 2013 | 67,334           | (47,607 to 89,909)   | 1246.6                             | (871.1 to 1661.0)  |
|         |         |                    | Female | 1990 | 57,077           | (34,395 to 75,667)   | 821.1                              | (509.3 to 1073.2)  |
|         |         |                    |        | 2013 | 57,079           | (43,399 to 74,385)   | 727.4                              | (567.8 to 936.8)   |
|         |         |                    | Both   | 1990 | 113,653          | (76,868 to 140,641)  | 992.7                              | (680.5 to 1225.2)  |
|         |         |                    |        | 2013 | 124,413          | (99,448 to 153,556)  | 957.4                              | (764.8 to 1182.8)  |
|         | YLDs    | Ischemic Stroke    | Male   | 1990 | 1,749            | (1,101 to 2,539)     | 38.7                               | (24.8 to 55.3)     |
|         |         |                    |        | 2013 | 2,162            | (1,421 to 3,062)     | 41.9                               | (27.7 to 58.4)     |
|         |         |                    | Female | 1990 | 1,729            | (1,121 to 2,486)     | 25.2                               | (16.4 to 36.2)     |
|         |         |                    |        | 2013 | 1,903            | (1,188 to 2,709)     | 24.3                               | (15.5 to 34.3)     |
|         |         |                    | Both   | 1990 | 3,478            | (2,331 to 4,795)     | 30.7                               | (20.6 to 42.4)     |
|         |         |                    |        | 2013 | 4,065            | (2,698 to 5,624)     | 31.5                               | (20.9 to 43.5)     |
|         |         | Hemorrhagic Stroke | Male   | 1990 | 60               | (36 to 90)           | 1.3                                | (0.8 to 1.9)       |
|         |         |                    |        | 2013 | 66               | (42 to 97)           | 1.3                                | (0.8 to 1.9)       |
|         |         |                    | Female | 1990 | 60               | (36 to 94)           | 0.9                                | (0.6 to 1.5)       |
|         |         |                    |        | 2013 | 65               | (38 to 102)          | 0.9                                | (0.5 to 1.4)       |
|         |         |                    | Both   | 1990 | 121              | (77 to 172)          | 1.1                                | (0.7 to 1.6)       |
|         |         |                    | Both   | 2013 | 131              | (83 to 192)          | 1.1                                | (0.7 to 1.6)       |
| Belgium | Deaths  | Ischemic Stroke    | Male   | 1990 | 2,650            | (2,119 to 3,256)     | 50.4                               | (39.8 to 62.0)     |

|         |         |                    |        |      |                  |                    |                                    |                  |
|---------|---------|--------------------|--------|------|------------------|--------------------|------------------------------------|------------------|
|         |         |                    |        | 2013 | 2,280            | (1,721 to 3,018)   | 24.9                               | (18.9 to 32.9)   |
|         |         |                    | Female | 1990 | 4,681            | (3,314 to 5,450)   | 45.8                               | (32.7 to 53.1)   |
|         |         |                    |        | 2013 | 3,465            | (2,589 to 5,307)   | 22                                 | (16.7 to 33.7)   |
|         |         |                    | Both   | 1990 | 7,332            | (5,877 to 8,261)   | 48.1                               | (38.7 to 54.1)   |
|         |         |                    |        | 2013 | 5,745            | (4,657 to 7,971)   | 23.4                               | (19.2 to 32.4)   |
|         | Deaths  | Hemorrhagic Stroke | Male   | 1990 | 1,676            | (1,308 to 2,213)   | 30.6                               | (23.9 to 40.6)   |
|         |         |                    |        | 2013 | 2,041            | (1,322 to 2,606)   | 23.2                               | (15.2 to 29.5)   |
|         |         |                    | Female | 1990 | 2,533            | (1,895 to 3,265)   | 27.5                               | (20.9 to 35.5)   |
|         |         |                    |        | 2013 | 2,611            | (1,866 to 3,622)   | 18.9                               | (13.9 to 25.8)   |
|         |         |                    | Both   | 1990 | 4,210            | (3,502 to 5,136)   | 28.9                               | (24.1 to 35.3)   |
|         |         |                    |        | 2013 | 4,652            | (3,580 to 5,637)   | 20.8                               | (16.3 to 25.1)   |
|         | DALYs   | Ischemic Stroke    | Male   | 1990 | 38,829           | (31,988 to 46,398) | 701.6                              | (578.8 to 836.9) |
|         |         |                    |        | 2013 | 30,971           | (25,161 to 37,977) | 359                                | (290.2 to 440.8) |
|         |         |                    | Female | 1990 | 49,158           | (36,493 to 55,476) | 534.6                              | (401.6 to 604.6) |
|         |         |                    |        | 2013 | 33,084           | (26,267 to 48,174) | 256.5                              | (205.2 to 367.3) |
|         |         |                    | Both   | 1990 | 87,987           | (73,840 to 98,699) | 605.8                              | (509.4 to 677.9) |
|         |         |                    |        |      | Counts, All ages |                    | Rate per 100,000, Age-standardized |                  |
| Country | measure | Stroke Type        | sex    | year | Mean             | 95% UI             | Mean                               | 95% UI           |
|         |         |                    |        | 2013 | 64,055           | (53,909 to 82,201) | 303                                | (255.7 to 386.9) |
|         |         | Hemorrhagic Stroke | Male   | 1990 | 30,711           | (24,849 to 39,006) | 543.8                              | (439.9 to 691.1) |
|         |         |                    |        | 2013 | 29,629           | (20,408 to 36,265) | 365.7                              | (256.4 to 447.4) |
|         |         |                    | Female | 1990 | 34,882           | (27,315 to 43,873) | 453.3                              | (356.6 to 562.0) |
|         |         |                    |        | 2013 | 28,877           | (22,422 to 38,725) | 277.2                              | (222.5 to 372.6) |
|         |         |                    | Both   | 1990 | 65,593           | (56,879 to 78,646) | 492.7                              | (432.1 to 587.0) |
|         |         |                    |        | 2013 | 58,507           | (47,770 to 68,927) | 317.2                              | (260.6 to 371.4) |
|         | YLDs    | Ischemic Stroke    | Male   | 1990 | 4,859            | (3,271 to 6,771)   | 84.9                               | (57.3 to 118.3)  |
|         |         |                    |        | 2013 | 6,957            | (4,631 to 9,795)   | 85                                 | (56.3 to 119.8)  |



|        |        |                    |        |      |        |                   |        |                   |
|--------|--------|--------------------|--------|------|--------|-------------------|--------|-------------------|
|        |        |                    | Female | 1990 | 4,769  | (3,192 to 6,808)  | 59.6   | (40.0 to 83.4)    |
|        |        |                    |        | 2013 | 5,937  | (3,934 to 8,410)  | 56.4   | (37.7 to 77.2)    |
|        |        |                    | Both   | 1990 | 9,628  | (6,644 to 13,116) | 70.1   | (48.5 to 95.6)    |
|        |        |                    |        | 2013 | 12,894 | (8,772 to 17,439) | 69.5   | (47.2 to 94.0)    |
|        |        | Hemorrhagic Stroke | Male   | 1990 | 1,005  | (564 to 1,532)    | 17.8   | (10.1 to 26.9)    |
|        |        |                    |        | 2013 | 1,365  | (773 to 2,482)    | 17.5   | (10.1 to 31.1)    |
|        |        |                    | Female | 1990 | 941    | (514 to 1,553)    | 12.7   | (7.2 to 21.1)     |
|        |        |                    |        | 2013 | 1,167  | (673 to 1,867)    | 12.5   | (7.5 to 19.7)     |
|        |        |                    | Both   | 1990 | 1,946  | (1,205 to 2,942)  | 14.8   | (9.2 to 22.2)     |
|        |        |                    | Both   | 2013 | 2,533  | (1,622 to 3,743)  | 14.8   | (9.7 to 21.5)     |
| Belize | Deaths | Ischemic Stroke    | Male   | 1990 | 27     | (21 to 33)        | 74.4   | (58.9 to 90.3)    |
|        |        |                    |        | 2013 | 51     | (38 to 65)        | 79.1   | (60.3 to 100.6)   |
|        |        |                    | Female | 1990 | 28     | (23 to 34)        | 68.5   | (54.7 to 82.7)    |
|        |        |                    |        | 2013 | 60     | (45 to 78)        | 78.7   | (59.5 to 102.6)   |
|        |        |                    | Both   | 1990 | 56     | (48 to 64)        | 71.4   | (61.7 to 82.3)    |
|        |        |                    |        | 2013 | 111    | (93 to 134)       | 79.2   | (66.7 to 94.6)    |
|        | Deaths | Hemorrhagic Stroke | Male   | 1990 | 15     | (12 to 19)        | 37.2   | (28.2 to 47.3)    |
|        |        |                    |        | 2013 | 31     | (20 to 41)        | 41.5   | (26.6 to 54.1)    |
|        |        |                    | Female | 1990 | 17     | (13 to 21)        | 39.1   | (30.1 to 48.6)    |
|        |        |                    |        | 2013 | 39     | (28 to 53)        | 46.9   | (33.1 to 62.2)    |
|        |        |                    | Both   | 1990 | 33     | (27 to 39)        | 38.3   | (31.2 to 45.3)    |
|        |        |                    |        | 2013 | 71     | (54 to 87)        | 44.5   | (33.6 to 54.0)    |
|        | DALYs  | Ischemic Stroke    | Male   | 1990 | 512    | (409 to 618)      | 1187.8 | (947.4 to 1431.6) |
|        |        |                    |        | 2013 | 965    | (725 to 1,244)    | 1292.8 | (984.6 to 1633.3) |
|        |        |                    | Female | 1990 | 453    | (355 to 546)      | 1001.2 | (789.1 to 1219.1) |
|        |        |                    |        | 2013 | 952    | (711 to 1,302)    | 1157.9 | (877.7 to 1563.0) |

|         |         |                    |        |      |                  |                  |                                    |                    |
|---------|---------|--------------------|--------|------|------------------|------------------|------------------------------------|--------------------|
|         |         |                    | Both   | 1990 | 965              | (819 to 1,108)   | 1093.4                             | (928.1 to 1258.5)  |
|         |         |                    |        | 2013 | 1,917            | (1,578 to 2,380) | 1224.8                             | (1015.3 to 1497.0) |
|         |         | Hemorrhagic Stroke | Male   | 1990 | 445              | (352 to 543)     | 807.2                              | (621.5 to 1002.5)  |
|         |         |                    |        |      | Counts, All ages |                  | Rate per 100,000, Age-standardized |                    |
| Country | measure | Stroke Type        | sex    | year | Mean             | 95% UI           | Mean                               | 95% UI             |
|         |         |                    |        | 2013 | 838              | (568 to 1,118)   | 880.3                              | (576.2 to 1150.7)  |
|         |         |                    | Female | 1990 | 443              | (355 to 540)     | 803.5                              | (633.5 to 971.6)   |
|         |         |                    |        | 2013 | 928              | (646 to 1,263)   | 933.2                              | (657.2 to 1269.5)  |
|         |         |                    | Both   | 1990 | 889              | (749 to 1,025)   | 805.8                              | (672.8 to 934.6)   |
|         |         |                    |        | 2013 | 1,766            | (1,385 to 2,207) | 909.2                              | (708.1 to 1127.8)  |
|         | YLDs    | Ischemic Stroke    | Male   | 1990 | 19               | (12 to 27)       | 48.2                               | (30.9 to 69.3)     |
|         |         |                    |        | 2013 | 33               | (21 to 46)       | 44.7                               | (28.3 to 62.2)     |
|         |         |                    | Female | 1990 | 13               | (8 to 19)        | 31.2                               | (19.5 to 46.1)     |
|         |         |                    |        | 2013 | 26               | (17 to 37)       | 31.8                               | (20.4 to 45.4)     |
|         |         |                    | Both   | 1990 | 32               | (21 to 46)       | 39.3                               | (26.5 to 56.2)     |
|         |         |                    |        | 2013 | 59               | (39 to 81)       | 37.9                               | (25.0 to 52.4)     |
|         |         | Hemorrhagic Stroke | Male   | 1990 | 6                | (4 to 9)         | 15.2                               | (9.5 to 21.9)      |
|         |         |                    |        | 2013 | 12               | (8 to 19)        | 14.3                               | (8.9 to 22.5)      |
|         |         |                    | Female | 1990 | 4                | (2 to 7)         | 10                                 | (6.1 to 15.5)      |
|         |         |                    |        | 2013 | 10               | (6 to 15)        | 10.3                               | (6.0 to 15.4)      |
|         |         |                    | Both   | 1990 | 11               | (7 to 16)        | 12.6                               | (8.2 to 17.9)      |
|         |         |                    | Both   | 2013 | 22               | (14 to 33)       | 12.2                               | (8.0 to 17.7)      |
| Benin   | Deaths  | Ischemic Stroke    | Male   | 1990 | 419              | (224 to 547)     | 65.6                               | (37.9 to 85.0)     |
|         |         |                    |        | 2013 | 1,204            | (386 to 1,778)   | 100.4                              | (35.0 to 144.8)    |
|         |         |                    | Female | 1990 | 565              | (275 to 765)     | 65.7                               | (33.5 to 91.4)     |
|         |         |                    |        | 2013 | 1,320            | (412 to 1,917)   | 90.5                               | (29.6 to 128.5)    |
|         |         |                    | Both   | 1990 | 985              | (610 to 1,255)   | 65.9                               | (41.3 to 85.6)     |

|         |         |                    |        |                  |        |                    |                                    |                    |
|---------|---------|--------------------|--------|------------------|--------|--------------------|------------------------------------|--------------------|
|         |         |                    |        | 2013             | 2,525  | (1,202 to 3,444)   | 95.2                               | (45.7 to 127.1)    |
|         | Deaths  | Hemorrhagic Stroke | Male   | 1990             | 532    | (409 to 722)       | 62                                 | (45.8 to 87.6)     |
|         |         |                    |        | 2013             | 994    | (570 to 1,829)     | 60.2                               | (30.8 to 125.0)    |
|         |         |                    | Female | 1990             | 627    | (420 to 919)       | 59.8                               | (38.1 to 91.5)     |
|         |         |                    |        | 2013             | 938    | (557 to 1,851)     | 51.1                               | (28.1 to 109.2)    |
|         |         |                    | Both   | 1990             | 1,160  | (897 to 1,551)     | 61                                 | (44.0 to 85.3)     |
|         |         |                    |        | 2013             | 1,932  | (1,211 to 3,386)   | 55.4                               | (32.1 to 107.3)    |
|         | DALYs   | Ischemic Stroke    | Male   | 1990             | 9,340  | (4,682 to 12,389)  | 1065.4                             | (570.4 to 1396.5)  |
|         |         |                    |        | 2013             | 26,165 | (7,707 to 39,746)  | 1599.3                             | (523.2 to 2343.0)  |
|         |         |                    | Female | 1990             | 10,715 | (4,911 to 14,738)  | 955.1                              | (456.3 to 1283.3)  |
|         |         |                    |        | 2013             | 23,502 | (6,939 to 35,643)  | 1273.9                             | (401.9 to 1860.9)  |
|         |         |                    | Both   | 1990             | 20,056 | (12,312 to 25,502) | 1004.7                             | (620.4 to 1279.4)  |
|         |         |                    |        | 2013             | 49,668 | (21,384 to 68,636) | 1426.3                             | (683.1 to 1940.5)  |
|         |         | Hemorrhagic Stroke | Male   | 1990             | 18,105 | (13,604 to 23,959) | 1342.3                             | (1025.4 to 1827.4) |
|         |         |                    |        | 2013             | 30,119 | (18,819 to 49,888) | 1268                               | (718.1 to 2357.2)  |
|         |         |                    | Female | 1990             | 17,419 | (11,864 to 23,901) | 1147.5                             | (772.0 to 1665.4)  |
|         |         |                    |        | 2013             | 23,668 | (15,068 to 41,566) | 966                                | (583.9 to 1860.3)  |
|         |         |                    | Both   | 1990             | 35,525 | (27,963 to 44,702) | 1238                               | (963.9 to 1648.6)  |
|         |         |                    |        | Counts, All ages |        |                    | Rate per 100,000, Age-standardized |                    |
| Country | measure | Stroke Type        | sex    | year             | Mean   | 95% UI             | Mean                               | 95% UI             |
|         |         |                    |        | 2013             | 53,788 | (36,857 to 83,507) | 1110.2                             | (701.8 to 1927.0)  |
|         | YLDs    | Ischemic Stroke    | Male   | 1990             | 155    | (96 to 225)        | 15.7                               | (9.9 to 23.0)      |
|         |         |                    |        | 2013             | 337    | (211 to 482)       | 15.5                               | (9.9 to 22.4)      |
|         |         |                    | Female | 1990             | 143    | (90 to 207)        | 11.1                               | (7.0 to 16.3)      |
|         |         |                    |        | 2013             | 294    | (182 to 428)       | 12                                 | (7.5 to 17.1)      |
|         |         |                    | Both   | 1990             | 298    | (198 to 414)       | 13                                 | (8.8 to 17.9)      |
|         |         |                    |        | 2013             | 632    | (414 to 889)       | 13.6                               | (8.9 to 18.8)      |

|        |        |                    |        |      |       |                  |        |                   |
|--------|--------|--------------------|--------|------|-------|------------------|--------|-------------------|
|        |        | Hemorrhagic Stroke | Male   | 1990 | 49    | (30 to 71)       | 4.2    | (2.5 to 6.2)      |
|        |        |                    |        | 2013 | 107   | (67 to 160)      | 4      | (2.5 to 6.0)      |
|        |        |                    | Female | 1990 | 40    | (24 to 59)       | 2.8    | (1.7 to 4.1)      |
|        |        |                    |        | 2013 | 78    | (48 to 115)      | 2.7    | (1.7 to 4.0)      |
|        |        |                    | Both   | 1990 | 90    | (57 to 125)      | 3.4    | (2.2 to 4.7)      |
|        |        |                    | Both   | 2013 | 186   | (120 to 266)     | 3.3    | (2.2 to 4.7)      |
| Bhutan | Deaths | Ischemic Stroke    | Male   | 1990 | 48    | (23 to 76)       | 64     | (32.7 to 97.0)    |
|        |        |                    |        | 2013 | 146   | (88 to 209)      | 77.8   | (47.4 to 109.2)   |
|        |        |                    | Female | 1990 | 46    | (27 to 73)       | 70     | (42.6 to 105.3)   |
|        |        |                    |        | 2013 | 129   | (61 to 196)      | 84.8   | (41.2 to 127.4)   |
|        |        |                    | Both   | 1990 | 95    | (56 to 142)      | 67     | (41.3 to 96.3)    |
|        |        |                    |        | 2013 | 275   | (160 to 392)     | 81     | (48.1 to 113.4)   |
|        | Deaths | Hemorrhagic Stroke | Male   | 1990 | 64    | (35 to 107)      | 60.5   | (33.1 to 98.2)    |
|        |        |                    |        | 2013 | 144   | (83 to 232)      | 65.6   | (39.2 to 103.8)   |
|        |        |                    | Female | 1990 | 62    | (37 to 101)      | 67.4   | (40.6 to 107.5)   |
|        |        |                    |        | 2013 | 122   | (58 to 206)      | 71.5   | (33.6 to 117.6)   |
|        |        |                    | Both   | 1990 | 127   | (79 to 198)      | 63.8   | (40.5 to 96.2)    |
|        |        |                    |        | 2013 | 267   | (157 to 419)     | 68.2   | (41.3 to 104.9)   |
|        | DALYs  | Ischemic Stroke    | Male   | 1990 | 1,014 | (506 to 1,670)   | 959.9  | (482.3 to 1515.5) |
|        |        |                    |        | 2013 | 2,335 | (1,341 to 3,550) | 1077.5 | (630.3 to 1587.7) |
|        |        |                    | Female | 1990 | 916   | (513 to 1,536)   | 1010.1 | (607.2 to 1583.2) |
|        |        |                    |        | 2013 | 1,861 | (839 to 2,955)   | 1106.2 | (508.7 to 1735.7) |
|        |        |                    | Both   | 1990 | 1,931 | (1,111 to 2,986) | 984.8  | (591.1 to 1465.6) |
|        |        |                    |        | 2013 | 4,196 | (2,394 to 6,253) | 1090.8 | (633.4 to 1597.4) |
|        |        | Hemorrhagic Stroke | Male   | 1990 | 1,936 | (1,123 to 3,127) | 1265.3 | (713.0 to 2095.0) |
|        |        |                    |        | 2013 | 3,403 | (1,889 to 5,706) | 1263.2 | (717.2 to 2066.3) |

|         |         |                    |        |      |                  |                   |                                    |                   |
|---------|---------|--------------------|--------|------|------------------|-------------------|------------------------------------|-------------------|
|         |         |                    | Female | 1990 | 1,763            | (1,051 to 2,819)  | 1367.7                             | (818.4 to 2216.2) |
|         |         |                    |        | 2013 | 2,669            | (1,260 to 4,635)  | 1316.3                             | (619.2 to 2283.3) |
|         |         |                    | Both   | 1990 | 3,699            | (2,348 to 5,801)  | 1313.6                             | (817.6 to 2041.8) |
|         |         |                    |        | 2013 | 6,073            | (3,357 to 10,092) | 1285.6                             | (728.9 to 2103.1) |
|         | YLDs    | Ischemic Stroke    | Male   | 1990 | 38               | (24 to 55)        | 27.5                               | (17.1 to 39.8)    |
|         |         |                    |        | 2013 | 76               | (50 to 111)       | 29.2                               | (18.8 to 42.0)    |
|         |         |                    | Female | 1990 | 30               | (19 to 44)        | 26                                 | (16.6 to 36.7)    |
|         |         |                    |        |      | Counts, All ages |                   | Rate per 100,000, Age-standardized |                   |
| Country | measure | Stroke Type        | sex    | year | Mean             | 95% UI            | Mean                               | 95% UI            |
|         |         |                    |        | 2013 | 51               | (33 to 74)        | 25.2                               | (16.4 to 35.8)    |
|         |         |                    | Both   | 1990 | 69               | (46 to 96)        | 26.8                               | (17.9 to 37.2)    |
|         |         |                    |        | 2013 | 128              | (86 to 178)       | 27.4                               | (18.4 to 38.1)    |
|         |         | Hemorrhagic Stroke | Male   | 1990 | 22               | (13 to 32)        | 14.2                               | (8.7 to 20.9)     |
|         |         |                    |        | 2013 | 41               | (26 to 60)        | 14.4                               | (9.2 to 20.8)     |
|         |         |                    | Female | 1990 | 14               | (9 to 21)         | 11.3                               | (7.4 to 15.8)     |
|         |         |                    |        | 2013 | 24               | (15 to 34)        | 10.8                               | (7.0 to 15.3)     |
|         |         |                    | Both   | 1990 | 36               | (24 to 51)        | 12.9                               | (8.4 to 17.8)     |
|         |         |                    | Both   | 2013 | 65               | (43 to 90)        | 12.8                               | (8.5 to 17.8)     |
| Bolivia | Deaths  | Ischemic Stroke    | Male   | 1990 | 472              | (368 to 600)      | 43.7                               | (33.2 to 55.1)    |
|         |         |                    |        | 2013 | 784              | (564 to 1,044)    | 37.4                               | (27.2 to 49.8)    |
|         |         |                    | Female | 1990 | 586              | (436 to 744)      | 45.4                               | (33.5 to 57.4)    |
|         |         |                    |        | 2013 | 1,088            | (762 to 1,539)    | 40.5                               | (28.2 to 57.0)    |
|         |         |                    | Both   | 1990 | 1,059            | (885 to 1,241)    | 44.7                               | (36.9 to 52.7)    |
|         |         |                    |        | 2013 | 1,872            | (1,465 to 2,386)  | 39.3                               | (30.9 to 49.3)    |
|         | Deaths  | Hemorrhagic Stroke | Male   | 1990 | 633              | (480 to 775)      | 39.2                               | (28.9 to 49.2)    |
|         |         |                    |        | 2013 | 832              | (567 to 1,150)    | 31                                 | (21.1 to 42.4)    |
|         |         |                    | Female | 1990 | 774              | (595 to 994)      | 42.6                               | (32.3 to 55.3)    |



|                        |        |                    |        |      |        |                    |        |                    |
|------------------------|--------|--------------------|--------|------|--------|--------------------|--------|--------------------|
|                        |        |                    |        | 2013 | 136    | (87 to 202)        | 3.5    | (2.2 to 5.3)       |
|                        |        |                    | Both   | 1990 | 183    | (120 to 265)       | 4.7    | (3.1 to 6.8)       |
|                        |        |                    | Both   | 2013 | 345    | (228 to 493)       | 4.7    | (3.1 to 6.6)       |
| Bosnia and Herzegovina | Deaths | Ischemic Stroke    | Male   | 1990 | 1,129  | (940 to 1,430)     | 105.7  | (87.7 to 133.1)    |
|                        |        |                    |        | 2013 | 2,406  | (1,616 to 2,976)   | 109.3  | (74.3 to 135.0)    |
|                        |        |                    | Female | 1990 | 1,355  | (1,147 to 1,668)   | 83.2   | (70.5 to 102.2)    |
|                        |        |                    |        | 2013 | 2,751  | (1,545 to 3,483)   | 87.6   | (49.7 to 111.1)    |
|                        |        |                    | Both   | 1990 | 2,484  | (2,225 to 2,988)   | 91.9   | (82.1 to 109.8)    |
|                        |        |                    |        | 2013 | 5,157  | (3,522 to 6,256)   | 96.9   | (66.8 to 117.4)    |
|                        | Deaths | Hemorrhagic Stroke | Male   | 1990 | 906    | (728 to 1,114)     | 67.6   | (53.3 to 83.9)     |
|                        |        |                    |        | 2013 | 676    | (340 to 1,257)     | 29.7   | (14.8 to 56.0)     |
|                        |        |                    | Female | 1990 | 1,086  | (822 to 1,250)     | 59.2   | (44.4 to 69.3)     |
|                        |        |                    |        | 2013 | 724    | (385 to 1,598)     | 23.7   | (12.7 to 51.1)     |
|                        |        |                    | Both   | 1990 | 1,993  | (1,699 to 2,261)   | 62.8   | (52.8 to 72.1)     |
|                        |        |                    |        | 2013 | 1,401  | (762 to 2,654)     | 26.4   | (14.5 to 49.7)     |
|                        | DALYs  | Ischemic Stroke    | Male   | 1990 | 17,901 | (14,797 to 22,792) | 1404.6 | (1168.9 to 1776.4) |
|                        |        |                    |        | 2013 | 34,001 | (21,856 to 42,683) | 1413.7 | (916.7 to 1764.6)  |
|                        |        |                    | Female | 1990 | 18,084 | (15,508 to 22,484) | 993    | (847.4 to 1231.2)  |
|                        |        |                    |        | 2013 | 31,952 | (16,704 to 40,844) | 991    | (521.8 to 1262.2)  |
|                        |        |                    | Both   | 1990 | 35,986 | (32,007 to 43,584) | 1156.8 | (1037.4 to 1394.3) |
|                        |        |                    |        | 2013 | 65,953 | (42,838 to 81,208) | 1176.1 | (766.5 to 1447.3)  |
|                        |        | Hemorrhagic Stroke | Male   | 1990 | 22,019 | (18,179 to 26,865) | 1313.2 | (1072.6 to 1597.6) |
|                        |        |                    |        | 2013 | 13,314 | (7,579 to 23,159)  | 566.6  | (329.1 to 973.8)   |
|                        |        |                    | Female | 1990 | 21,634 | (17,119 to 24,506) | 1045.5 | (816.9 to 1185.2)  |
|                        |        |                    |        | 2013 | 11,798 | (7,054 to 23,644)  | 403.8  | (250.2 to 780.1)   |
|                        |        |                    | Both   | 1990 | 43,654 | (38,350 to 49,405) | 1165.4 | (1020.9 to 1326.9) |

|          |         |                    |        | 2013 | 25,112           | (15,315 to 43,629) | 479.9                              | (299.7 to 813.4) |
|----------|---------|--------------------|--------|------|------------------|--------------------|------------------------------------|------------------|
|          | YLDs    | Ischemic Stroke    | Male   | 1990 | 369              | (231 to 544)       | 20.7                               | (13.2 to 30.1)   |
|          |         |                    |        | 2013 | 617              | (405 to 887)       | 25.4                               | (16.7 to 36.5)   |
|          |         |                    | Female | 1990 | 302              | (200 to 431)       | 14.1                               | (9.4 to 19.9)    |
|          |         |                    |        | 2013 | 417              | (263 to 601)       | 14.4                               | (9.3 to 20.6)    |
|          |         |                    | Both   | 1990 | 671              | (452 to 925)       | 17                                 | (11.7 to 23.6)   |
|          |         |                    |        | 2013 | 1,034            | (701 to 1,436)     | 19.4                               | (13.2 to 27.0)   |
|          |         | Hemorrhagic Stroke | Male   | 1990 | 92               | (53 to 142)        | 4.7                                | (2.6 to 7.0)     |
|          |         |                    |        | 2013 | 124              | (72 to 195)        | 5.4                                | (3.2 to 8.3)     |
|          |         |                    |        |      | Counts, All ages |                    | Rate per 100,000, Age-standardized |                  |
| Country  | measure | Stroke Type        | sex    | year | Mean             | 95% UI             | Mean                               | 95% UI           |
|          |         |                    | Female | 1990 | 77               | (46 to 117)        | 3.4                                | (2.1 to 5.2)     |
|          |         |                    |        | 2013 | 96               | (57 to 155)        | 3.6                                | (2.2 to 5.8)     |
|          |         |                    | Both   | 1990 | 169              | (108 to 238)       | 4                                  | (2.5 to 5.6)     |
|          |         |                    | Both   | 2013 | 221              | (140 to 332)       | 4.4                                | (2.8 to 6.6)     |
| Botswana | Deaths  | Ischemic Stroke    | Male   | 1990 | 57               | (28 to 92)         | 45.2                               | (23.2 to 68.9)   |
|          |         |                    |        | 2013 | 130              | (77 to 214)        | 48.5                               | (29.4 to 76.7)   |
|          |         |                    | Female | 1990 | 93               | (49 to 156)        | 51                                 | (28.4 to 79.9)   |
|          |         |                    |        | 2013 | 109              | (51 to 262)        | 28.4                               | (14.0 to 63.1)   |
|          |         |                    | Both   | 1990 | 151              | (89 to 235)        | 49.1                               | (30.3 to 72.3)   |
|          |         |                    |        | 2013 | 240              | (156 to 404)       | 36.3                               | (24.0 to 60.0)   |
|          | Deaths  | Hemorrhagic Stroke | Male   | 1990 | 88               | (51 to 139)        | 54.1                               | (32.3 to 82.5)   |
|          |         |                    |        | 2013 | 134              | (83 to 207)        | 38.1                               | (23.7 to 59.3)   |
|          |         |                    | Female | 1990 | 121              | (73 to 185)        | 56.9                               | (34.7 to 84.0)   |
|          |         |                    |        | 2013 | 93               | (49 to 200)        | 19.8                               | (10.3 to 43.1)   |
|          |         |                    | Both   | 1990 | 210              | (138 to 287)       | 56.1                               | (37.5 to 74.4)   |
|          |         |                    |        | 2013 | 227              | (155 to 348)       | 27.2                               | (18.1 to 42.8)   |



|         |         |                    |        |      |                  |                    |                                    |                   |
|---------|---------|--------------------|--------|------|------------------|--------------------|------------------------------------|-------------------|
|         | DALYs   | Ischemic Stroke    | Male   | 1990 | 1,186            | (542 to 1,986)     | 678.4                              | (338.6 to 1069.2) |
|         |         |                    |        | 2013 | 2,475            | (1,420 to 4,106)   | 693.7                              | (412.9 to 1153.9) |
|         |         |                    | Female | 1990 | 1,560            | (767 to 2,936)     | 677.3                              | (357.1 to 1168.8) |
|         |         |                    |        | 2013 | 1,407            | (633 to 3,606)     | 285.4                              | (127.7 to 732.7)  |
|         |         |                    | Both   | 1990 | 2,746            | (1,523 to 4,613)   | 681.5                              | (404.9 to 1062.5) |
|         |         |                    |        | 2013 | 3,883            | (2,489 to 6,453)   | 450.4                              | (287.1 to 762.4)  |
|         |         | Hemorrhagic Stroke | Male   | 1990 | 2,390            | (1,384 to 3,793)   | 980.9                              | (575.3 to 1551.3) |
|         |         |                    |        | 2013 | 3,741            | (2,341 to 5,614)   | 722.5                              | (446.2 to 1107.6) |
|         |         |                    | Female | 1990 | 2,650            | (1,570 to 4,126)   | 922.6                              | (553.1 to 1421.4) |
|         |         |                    |        | 2013 | 2,309            | (1,296 to 4,430)   | 327.9                              | (176.9 to 698.3)  |
|         |         |                    | Both   | 1990 | 5,041            | (3,319 to 7,030)   | 952.5                              | (625.7 to 1303.5) |
|         |         |                    |        | 2013 | 6,050            | (4,244 to 8,740)   | 495.9                              | (336.4 to 749.8)  |
|         | YLDs    | Ischemic Stroke    | Male   | 1990 | 48               | (31 to 68)         | 19.8                               | (13.0 to 27.5)    |
|         |         |                    |        | 2013 | 92               | (59 to 130)        | 19.5                               | (12.7 to 28.0)    |
|         |         |                    | Female | 1990 | 55               | (35 to 80)         | 17.8                               | (11.4 to 25.9)    |
|         |         |                    |        | 2013 | 104              | (67 to 146)        | 18                                 | (12.0 to 25.3)    |
|         |         |                    | Both   | 1990 | 103              | (68 to 141)        | 18.6                               | (12.5 to 25.4)    |
|         |         |                    |        | 2013 | 196              | (132 to 265)       | 18.6                               | (12.6 to 25.8)    |
|         |         | Hemorrhagic Stroke | Male   | 1990 | 15               | (10 to 23)         | 5.2                                | (3.3 to 7.7)      |
|         |         |                    |        | 2013 | 30               | (18 to 43)         | 5.2                                | (3.2 to 7.8)      |
|         |         |                    | Female | 1990 | 15               | (9 to 23)          | 4.4                                | (2.7 to 6.4)      |
|         |         |                    |        | 2013 | 27               | (17 to 39)         | 4.3                                | (2.7 to 6.2)      |
|         |         |                    | Both   | 1990 | 31               | (20 to 45)         | 4.7                                | (3.1 to 6.7)      |
|         |         |                    | Both   | 2013 | 57               | (38 to 80)         | 4.7                                | (3.2 to 6.6)      |
|         |         |                    |        |      | Counts, All ages |                    | Rate per 100,000, Age-standardized |                   |
| Country | measure | Stroke Type        | sex    | year | Mean             | 95% UI             | Mean                               | 95% UI            |
| Brazil  | Deaths  | Ischemic Stroke    | Male   | 1990 | 24,841           | (20,179 to 28,951) | 86.3                               | (70.2 to 101.2)   |

|  |        |                    |        |      |           |                        |        |                    |
|--|--------|--------------------|--------|------|-----------|------------------------|--------|--------------------|
|  |        |                    |        | 2013 | 36,981    | (29,150 to 44,077)     | 56.9   | (45.0 to 68.1)     |
|  |        |                    | Female | 1990 | 24,304    | (17,795 to 27,108)     | 72.4   | (53.3 to 80.6)     |
|  |        |                    |        | 2013 | 37,836    | (30,797 to 50,377)     | 43.1   | (35.2 to 57.2)     |
|  |        |                    | Both   | 1990 | 49,146    | (40,878 to 54,390)     | 78.9   | (65.3 to 87.2)     |
|  |        |                    |        | 2013 | 74,817    | (64,647 to 88,799)     | 49.2   | (42.7 to 58.2)     |
|  | Deaths | Hemorrhagic Stroke | Male   | 1990 | 22,706    | (18,608 to 27,657)     | 62     | (50.1 to 76.3)     |
|  |        |                    |        | 2013 | 35,225    | (26,486 to 42,496)     | 47.3   | (35.3 to 57.4)     |
|  |        |                    | Female | 1990 | 22,735    | (17,864 to 26,112)     | 54.7   | (42.7 to 64.2)     |
|  |        |                    |        | 2013 | 33,728    | (27,983 to 43,770)     | 36.4   | (30.1 to 47.3)     |
|  |        |                    | Both   | 1990 | 45,442    | (39,138 to 51,192)     | 58.2   | (50.0 to 66.3)     |
|  |        |                    |        | 2013 | 68,953    | (58,773 to 79,266)     | 41.3   | (35.0 to 47.9)     |
|  | DALYs  | Ischemic Stroke    | Male   | 1990 | 457,393   | (369,857 to 538,603)   | 1323   | (1076.0 to 1541.3) |
|  |        |                    |        | 2013 | 578,617   | (455,234 to 692,263)   | 805.8  | (637.8 to 958.1)   |
|  |        |                    | Female | 1990 | 373,233   | (267,720 to 420,521)   | 962.2  | (706.8 to 1072.8)  |
|  |        |                    |        | 2013 | 465,090   | (387,263 to 620,491)   | 518.8  | (432.8 to 690.9)   |
|  |        |                    | Both   | 1990 | 830,627   | (681,647 to 922,020)   | 1131.1 | (945.3 to 1251.3)  |
|  |        |                    |        | 2013 | 1,043,707 | (886,778 to 1,230,889) | 647.7  | (552.6 to 761.2)   |
|  |        | Hemorrhagic Stroke | Male   | 1990 | 634,573   | (528,073 to 772,437)   | 1396   | (1154.1 to 1684.1) |
|  |        |                    |        | 2013 | 831,946   | (629,519 to 1,000,392) | 981    | (739.5 to 1180.1)  |
|  |        |                    | Female | 1990 | 607,310   | (475,107 to 674,093)   | 1205.6 | (958.8 to 1354.7)  |
|  |        |                    |        | 2013 | 709,011   | (597,946 to            | 721.1  | (608.9 to 921.0)   |

|         |         |                    |        |      |                  |                          |                                    |                    |
|---------|---------|--------------------|--------|------|------------------|--------------------------|------------------------------------|--------------------|
|         |         |                    |        |      |                  | 907,512)                 |                                    |                    |
|         |         |                    | Both   | 1990 | 1,241,884        | (1,077,713 to 1,380,959) | 1295.2                             | (1119.5 to 1444.5) |
|         |         |                    |        | 2013 | 1,540,958        | (1,318,406 to 1,764,972) | 840.8                              | (720.7 to 962.7)   |
|         | YLDs    | Ischemic Stroke    | Male   | 1990 | 14,146           | (8,818 to 20,599)        | 36.4                               | (22.6 to 53.3)     |
|         |         |                    |        | 2013 | 27,025           | (17,097 to 38,635)       | 33.9                               | (21.6 to 48.7)     |
|         |         |                    | Female | 1990 | 10,255           | (6,778 to 14,334)        | 23.3                               | (15.3 to 33.5)     |
|         |         |                    |        | 2013 | 20,500           | (13,350 to 28,692)       | 21.7                               | (14.2 to 30.4)     |
|         |         |                    | Both   | 1990 | 24,401           | (15,986 to 33,788)       | 29.4                               | (19.4 to 40.9)     |
|         |         |                    |        | 2013 | 47,526           | (32,459 to 64,447)       | 27.3                               | (18.7 to 36.8)     |
|         |         | Hemorrhagic Stroke | Male   | 1990 | 2,851            | (1,764 to 4,247)         | 6.2                                | (3.9 to 9.3)       |
|         |         |                    |        | 2013 | 5,324            | (3,315 to 7,601)         | 6.2                                | (3.9 to 8.8)       |
|         |         |                    |        |      | Counts, All ages |                          | Rate per 100,000, Age-standardized |                    |
| Country | measure | Stroke Type        | sex    | year | Mean             | 95% UI                   | Mean                               | 95% UI             |
|         |         |                    | Female | 1990 | 2,298            | (1,445 to 3,401)         | 4.5                                | (2.9 to 6.7)       |
|         |         |                    |        | 2013 | 4,606            | (2,956 to 6,590)         | 4.6                                | (3.0 to 6.7)       |
|         |         |                    | Both   | 1990 | 5,149            | (3,352 to 7,229)         | 5.3                                | (3.5 to 7.5)       |
|         |         |                    | Both   | 2013 | 9,931            | (6,734 to 13,706)        | 5.4                                | (3.6 to 7.3)       |
| Brunei  | Deaths  | Ischemic Stroke    | Male   | 1990 | 25               | (18 to 33)               | 73.5                               | (55.3 to 96.2)     |
|         |         |                    |        | 2013 | 34               | (25 to 45)               | 47.9                               | (35.5 to 62.5)     |
|         |         |                    | Female | 1990 | 29               | (20 to 37)               | 87.5                               | (63.6 to 109.1)    |
|         |         |                    |        | 2013 | 45               | (35 to 59)               | 52.4                               | (41.2 to 70.2)     |
|         |         |                    | Both   | 1990 | 54               | (43 to 66)               | 80.5                               | (65.7 to 96.5)     |
|         |         |                    |        | 2013 | 80               | (66 to 99)               | 50.6                               | (41.9 to 62.1)     |
|         | Deaths  | Hemorrhagic Stroke | Male   | 1990 | 35               | (26 to 43)               | 75.7                               | (57.2 to 96.1)     |
|         |         |                    |        | 2013 | 49               | (34 to 66)               | 42.6                               | (29.6 to 56.6)     |

|  |       |                    |        |      |       |                  |        |                    |
|--|-------|--------------------|--------|------|-------|------------------|--------|--------------------|
|  |       |                    | Female | 1990 | 28    | (19 to 34)       | 70.8   | (47.6 to 88.5)     |
|  |       |                    |        | 2013 | 41    | (30 to 55)       | 37.4   | (27.7 to 49.9)     |
|  |       |                    | Both   | 1990 | 63    | (48 to 74)       | 73.4   | (55.9 to 87.3)     |
|  |       |                    |        | 2013 | 91    | (71 to 112)      | 40     | (31.5 to 49.5)     |
|  | DALYs | Ischemic Stroke    | Male   | 1990 | 431   | (318 to 605)     | 1043.1 | (783.9 to 1398.7)  |
|  |       |                    |        | 2013 | 641   | (495 to 855)     | 631.5  | (492.4 to 811.4)   |
|  |       |                    | Female | 1990 | 500   | (323 to 681)     | 1171.6 | (804.5 to 1517.7)  |
|  |       |                    |        | 2013 | 726   | (562 to 937)     | 621.1  | (492.8 to 797.5)   |
|  |       |                    | Both   | 1990 | 931   | (706 to 1,166)   | 1104.9 | (877.1 to 1342.0)  |
|  |       |                    |        | 2013 | 1,367 | (1,134 to 1,693) | 627    | (525.2 to 760.3)   |
|  |       | Hemorrhagic Stroke | Male   | 1990 | 954   | (736 to 1,159)   | 1565.6 | (1203.3 to 1921.6) |
|  |       |                    |        | 2013 | 1,336 | (909 to 1,767)   | 824.7  | (575.7 to 1089.1)  |
|  |       |                    | Female | 1990 | 701   | (477 to 896)     | 1357.4 | (939.0 to 1677.7)  |
|  |       |                    |        | 2013 | 982   | (725 to 1,308)   | 656    | (489.3 to 870.2)   |
|  |       |                    | Both   | 1990 | 1,655 | (1,298 to 1,932) | 1466   | (1135.1 to 1697.0) |
|  |       |                    |        | 2013 | 2,319 | (1,822 to 2,806) | 741.1  | (588.1 to 902.6)   |
|  | YLDs  | Ischemic Stroke    | Male   | 1990 | 46    | (30 to 65)       | 99.1   | (64.6 to 143.5)    |
|  |       |                    |        | 2013 | 117   | (76 to 172)      | 91.6   | (59.3 to 134.2)    |
|  |       |                    | Female | 1990 | 24    | (16 to 34)       | 57.4   | (37.9 to 82.0)     |
|  |       |                    |        | 2013 | 71    | (47 to 100)      | 58     | (37.4 to 81.0)     |
|  |       |                    | Both   | 1990 | 70    | (47 to 98)       | 79.1   | (53.0 to 111.4)    |
|  |       |                    |        | 2013 | 189   | (127 to 263)     | 74.6   | (50.2 to 103.7)    |
|  |       | Hemorrhagic Stroke | Male   | 1990 | 19    | (12 to 27)       | 32.9   | (21.2 to 48.7)     |
|  |       |                    |        | 2013 | 47    | (29 to 69)       | 32.1   | (20.2 to 47.2)     |
|  |       |                    | Female | 1990 | 11    | (7 to 15)        | 20.3   | (12.9 to 28.5)     |
|  |       |                    |        | 2013 | 35    | (22 to 50)       | 23.6   | (15.1 to 33.9)     |

|          |         |                    | Both   | 1990             | 30      | (20 to 42)           | 26.9                               | (18.0 to 37.5)     |
|----------|---------|--------------------|--------|------------------|---------|----------------------|------------------------------------|--------------------|
|          |         |                    |        | Counts, All ages |         |                      | Rate per 100,000, Age-standardized |                    |
| Country  | measure | Stroke Type        | sex    | year             | Mean    | 95% UI               | Mean                               | 95% UI             |
|          |         |                    | Both   | 2013             | 82      | (54 to 115)          | 27.8                               | (18.4 to 39.3)     |
| Bulgaria | Deaths  | Ischemic Stroke    | Male   | 1990             | 7,551   | (6,430 to 8,864)     | 171.1                              | (145.5 to 200.8)   |
|          |         |                    |        | 2013             | 8,540   | (6,810 to 9,937)     | 156.6                              | (124.3 to 183.0)   |
|          |         |                    | Female | 1990             | 8,593   | (7,237 to 9,876)     | 146.5                              | (123.5 to 169.2)   |
|          |         |                    |        | 2013             | 10,243  | (7,710 to 11,773)    | 115.5                              | (86.8 to 132.9)    |
|          |         |                    | Both   | 1990             | 16,144  | (14,401 to 17,923)   | 157.6                              | (141.0 to 175.1)   |
|          |         |                    |        | 2013             | 18,784  | (15,320 to 20,808)   | 132.8                              | (108.5 to 147.0)   |
|          | Deaths  | Hemorrhagic Stroke | Male   | 1990             | 4,910   | (3,804 to 5,840)     | 100.6                              | (77.6 to 119.8)    |
|          |         |                    |        | 2013             | 3,691   | (2,656 to 5,403)     | 68.1                               | (49.0 to 99.0)     |
|          |         |                    | Female | 1990             | 5,513   | (4,010 to 6,165)     | 90.7                               | (65.4 to 101.5)    |
|          |         |                    |        | 2013             | 3,771   | (2,740 to 6,452)     | 46.8                               | (34.7 to 78.9)     |
|          |         |                    | Both   | 1990             | 10,423  | (8,423 to 11,655)    | 95.7                               | (77.3 to 107.2)    |
|          |         |                    |        | 2013             | 7,462   | (5,548 to 11,181)    | 56.4                               | (42.4 to 83.2)     |
|          | DALYs   | Ischemic Stroke    | Male   | 1990             | 113,546 | (95,194 to 132,999)  | 2354.3                             | (1991.8 to 2757.0) |
|          |         |                    |        | 2013             | 116,341 | (93,335 to 135,754)  | 2118                               | (1694.9 to 2474.8) |
|          |         |                    | Female | 1990             | 109,308 | (90,282 to 124,809)  | 1808.8                             | (1501.5 to 2064.3) |
|          |         |                    |        | 2013             | 109,150 | (82,045 to 125,223)  | 1303                               | (980.2 to 1494.5)  |
|          |         |                    | Both   | 1990             | 222,855 | (195,821 to 248,704) | 2059.5                             | (1818.5 to 2290.2) |
|          |         |                    |        | 2013             | 225,491 | (187,684 to 250,159) | 1658.8                             | (1378.2 to 1844.6) |
|          |         | Hemorrhagic        | Male   | 1990             | 102,354 | (80,597 to           | 1979.4                             | (1555.0 to 2326.8) |

|                         |                |                    |            |             |             |                      |                                           |                    |
|-------------------------|----------------|--------------------|------------|-------------|-------------|----------------------|-------------------------------------------|--------------------|
|                         |                | Stroke             |            |             |             | 120,725)             |                                           |                    |
|                         |                |                    |            | 2013        | 71,454      | (54,174 to 99,043)   | 1356.6                                    | (1033.7 to 1869.7) |
|                         |                |                    | Female     | 1990        | 96,364      | (70,593 to 105,892)  | 1579.8                                    | (1152.4 to 1735.5) |
|                         |                |                    |            | 2013        | 55,602      | (42,338 to 91,901)   | 795                                       | (618.5 to 1278.5)  |
|                         |                |                    | Both       | 1990        | 198,719     | (162,235 to 221,049) | 1774.6                                    | (1446.6 to 1975.8) |
|                         |                |                    |            | 2013        | 127,056     | (98,566 to 178,397)  | 1057.5                                    | (829.8 to 1461.6)  |
|                         | YLDs           | Ischemic Stroke    | Male       | 1990        | 1,180       | (756 to 1,676)       | 22.9                                      | (14.9 to 32.1)     |
|                         |                |                    |            | 2013        | 1,318       | (862 to 1,948)       | 25.3                                      | (16.5 to 37.1)     |
|                         |                |                    | Female     | 1990        | 876         | (572 to 1,238)       | 14.8                                      | (9.7 to 20.8)      |
|                         |                |                    |            | 2013        | 969         | (621 to 1,422)       | 14.7                                      | (9.7 to 21.0)      |
|                         |                |                    | Both       | 1990        | 2,056       | (1,397 to 2,871)     | 18.6                                      | (12.6 to 25.6)     |
|                         |                |                    |            | 2013        | 2,288       | (1,550 to 3,208)     | 19.5                                      | (13.2 to 27.4)     |
|                         |                | Hemorrhagic Stroke | Male       | 1990        | 243         | (138 to 382)         | 4.9                                       | (2.8 to 7.6)       |
| <b>Counts, All ages</b> |                |                    |            |             |             |                      |                                           |                    |
| <b>Country</b>          | <b>measure</b> | <b>Stroke Type</b> | <b>sex</b> | <b>year</b> | <b>Mean</b> | <b>95% UI</b>        | <b>Rate per 100,000, Age-standardized</b> |                    |
|                         |                |                    |            | 2013        | 251         | (141 to 385)         | 5.2                                       | (3.0 to 7.8)       |
|                         |                |                    | Female     | 1990        | 196         | (116 to 296)         | 3.5                                       | (2.2 to 5.2)       |
|                         |                |                    |            | 2013        | 206         | (123 to 316)         | 3.6                                       | (2.2 to 5.4)       |
|                         |                |                    | Both       | 1990        | 439         | (272 to 633)         | 4.2                                       | (2.6 to 6.0)       |
|                         |                |                    | Both       | 2013        | 458         | (292 to 649)         | 4.3                                       | (2.8 to 6.2)       |
| Burkina Faso            | Deaths         | Ischemic Stroke    | Male       | 1990        | 364         | (145 to 543)         | 30.2                                      | (12.5 to 45.1)     |
|                         |                |                    |            | 2013        | 1,057       | (269 to 1,505)       | 65.8                                      | (19.1 to 91.2)     |
|                         |                |                    | Female     | 1990        | 445         | (172 to 722)         | 28.5                                      | (11.6 to 45.5)     |
|                         |                |                    |            | 2013        | 1,258       | (327 to 1,860)       | 56.3                                      | (14.7 to 81.6)     |

|  |        |                    |        |      |        |                    |        |                   |
|--|--------|--------------------|--------|------|--------|--------------------|--------|-------------------|
|  |        |                    | Both   | 1990 | 809    | (491 to 1,082)     | 29.2   | (17.6 to 39.4)    |
|  |        |                    |        | 2013 | 2,315  | (981 to 3,180)     | 60.2   | (25.9 to 81.3)    |
|  | Deaths | Hemorrhagic Stroke | Male   | 1990 | 426    | (257 to 614)       | 29     | (16.2 to 43.9)    |
|  |        |                    |        | 2013 | 804    | (447 to 1,516)     | 37.7   | (19.1 to 80.1)    |
|  |        |                    | Female | 1990 | 520    | (294 to 840)       | 27.5   | (15.2 to 45.7)    |
|  |        |                    |        | 2013 | 896    | (576 to 1,694)     | 30.9   | (18.9 to 63.7)    |
|  |        |                    | Both   | 1990 | 947    | (661 to 1,285)     | 28.2   | (18.7 to 40.0)    |
|  |        |                    |        | 2013 | 1,700  | (1,135 to 2,940)   | 33.7   | (21.2 to 62.2)    |
|  | DALYs  | Ischemic Stroke    | Male   | 1990 | 8,449  | (3,236 to 12,678)  | 550.7  | (223.6 to 817.6)  |
|  |        |                    |        | 2013 | 22,850 | (5,652 to 33,576)  | 1077.3 | (290.6 to 1523.8) |
|  |        |                    | Female | 1990 | 9,650  | (3,441 to 15,590)  | 487.4  | (183.7 to 781.2)  |
|  |        |                    |        | 2013 | 23,627 | (5,940 to 37,025)  | 834.5  | (222.2 to 1236.0) |
|  |        |                    | Both   | 1990 | 18,100 | (10,485 to 24,399) | 514.3  | (311.2 to 683.7)  |
|  |        |                    |        | 2013 | 46,477 | (19,143 to 65,753) | 935.6  | (397.4 to 1282.2) |
|  |        | Hemorrhagic Stroke | Male   | 1990 | 12,909 | (8,240 to 17,651)  | 653.7  | (397.2 to 932.5)  |
|  |        |                    |        | 2013 | 23,553 | (14,077 to 40,405) | 777.3  | (426.0 to 1495.0) |
|  |        |                    | Female | 1990 | 14,785 | (8,918 to 21,442)  | 606.1  | (346.7 to 942.6)  |
|  |        |                    |        | 2013 | 24,033 | (15,881 to 40,806) | 624.8  | (403.0 to 1156.2) |
|  |        |                    | Both   | 1990 | 27,694 | (19,990 to 35,545) | 626.5  | (439.8 to 835.4)  |
|  |        |                    |        | 2013 | 47,586 | (34,081 to 74,078) | 688    | (460.0 to 1196.2) |
|  | YLDs   | Ischemic Stroke    | Male   | 1990 | 267    | (175 to 381)       | 15.9   | (10.2 to 22.5)    |
|  |        |                    |        | 2013 | 446    | (285 to 637)       | 14.9   | (9.5 to 21.3)     |
|  |        |                    | Female | 1990 | 249    | (158 to 364)       | 11.3   | (7.1 to 16.3)     |
|  |        |                    |        | 2013 | 447    | (283 to 655)       | 11.8   | (7.7 to 17.4)     |
|  |        |                    | Both   | 1990 | 516    | (340 to 724)       | 13.3   | (8.8 to 18.4)     |
|  |        |                    |        | 2013 | 893    | (592 to 1,243)     | 13.1   | (8.8 to 18.2)     |

|         |         | Hemorrhagic Stroke | Male   | 1990 | 84               | (53 to 123)        | 4.2                                | (2.6 to 6.2)      |
|---------|---------|--------------------|--------|------|------------------|--------------------|------------------------------------|-------------------|
|         |         |                    |        | 2013 | 149              | (90 to 217)        | 3.9                                | (2.4 to 5.7)      |
|         |         |                    | Female | 1990 | 72               | (45 to 106)        | 2.9                                | (1.8 to 4.4)      |
|         |         |                    |        | 2013 | 121              | (74 to 178)        | 2.7                                | (1.6 to 4.1)      |
|         |         |                    |        |      | Counts, All ages |                    | Rate per 100,000, Age-standardized |                   |
| Country | measure | Stroke Type        | sex    | year | Mean             | 95% UI             | Mean                               | 95% UI            |
|         |         |                    | Both   | 1990 | 156              | (103 to 218)       | 3.5                                | (2.3 to 4.8)      |
|         |         |                    | Both   | 2013 | 270              | (173 to 381)       | 3.2                                | (2.0 to 4.5)      |
| Burundi | Deaths  | Ischemic Stroke    | Male   | 1990 | 614              | (42 to 1,086)      | 90.6                               | (6.3 to 157.3)    |
|         |         |                    |        | 2013 | 816              | (174 to 1,312)     | 72.8                               | (15.9 to 114.4)   |
|         |         |                    | Female | 1990 | 799              | (71 to 1,503)      | 92.2                               | (8.9 to 171.7)    |
|         |         |                    |        | 2013 | 1,012            | (390 to 1,655)     | 80.5                               | (31.5 to 130.2)   |
|         |         |                    | Both   | 1990 | 1,413            | (171 to 2,316)     | 91.7                               | (12.0 to 150.1)   |
|         |         |                    |        | 2013 | 1,829            | (727 to 2,585)     | 77.3                               | (32.0 to 108.6)   |
|         | Deaths  | Hemorrhagic Stroke | Male   | 1990 | 1,259            | (829 to 2,003)     | 148.8                              | (94.2 to 245.7)   |
|         |         |                    |        | 2013 | 1,436            | (976 to 2,197)     | 99.4                               | (63.9 to 162.3)   |
|         |         |                    | Female | 1990 | 1,643            | (967 to 2,778)     | 157.7                              | (91.3 to 280.1)   |
|         |         |                    |        | 2013 | 1,601            | (1,023 to 2,899)   | 105.7                              | (64.9 to 198.0)   |
|         |         |                    | Both   | 1990 | 2,903            | (1,994 to 4,315)   | 154                                | (103.0 to 240.4)  |
|         |         |                    |        | 2013 | 3,038            | (2,216 to 4,632)   | 103                                | (72.5 to 167.2)   |
|         | DALYs   | Ischemic Stroke    | Male   | 1990 | 12,176           | (888 to 22,088)    | 1450.3                             | (110.6 to 2569.4) |
|         |         |                    |        | 2013 | 15,514           | (3,177 to 25,631)  | 1090.4                             | (240.7 to 1748.4) |
|         |         |                    | Female | 1990 | 14,210           | (1,279 to 27,148)  | 1390.1                             | (127.8 to 2656.8) |
|         |         |                    |        | 2013 | 16,592           | (6,004 to 27,423)  | 1126.1                             | (420.8 to 1846.5) |
|         |         |                    | Both   | 1990 | 26,386           | (3,073 to 42,885)  | 1420.2                             | (176.8 to 2327.0) |
|         |         |                    |        | 2013 | 32,106           | (11,996 to 45,909) | 1114.4                             | (441.2 to 1583.9) |



|                  |         |                    |        |      |        |                     |                                    |                    |
|------------------|---------|--------------------|--------|------|--------|---------------------|------------------------------------|--------------------|
|                  |         | Hemorrhagic Stroke | Male   | 1990 | 33,465 | (22,511 to 51,334)  | 3092.3                             | (2052.6 to 4877.6) |
|                  |         |                    |        | 2013 | 37,529 | (26,587 to 53,374)  | 1941.8                             | (1325.9 to 2955.5) |
|                  |         |                    | Female | 1990 | 39,894 | (23,039 to 63,947)  | 3178.7                             | (1891.7 to 5263.7) |
|                  |         |                    |        | 2013 | 36,679 | (24,427 to 63,078)  | 1947.5                             | (1259.8 to 3464.7) |
|                  |         |                    | Both   | 1990 | 73,360 | (51,954 to 104,544) | 3144.9                             | (2175.9 to 4592.3) |
|                  |         |                    |        | 2013 | 74,209 | (56,573 to 107,511) | 1949.5                             | (1436.4 to 2939.2) |
|                  | YLDs    | Ischemic Stroke    | Male   | 1990 | 121    | (77 to 181)         | 10.6                               | (6.9 to 15.9)      |
|                  |         |                    |        | 2013 | 218    | (135 to 324)        | 10.3                               | (6.4 to 15.0)      |
|                  |         |                    | Female | 1990 | 95     | (59 to 139)         | 7.1                                | (4.6 to 10.4)      |
|                  |         |                    |        | 2013 | 170    | (108 to 247)        | 7.5                                | (4.9 to 10.7)      |
|                  |         |                    | Both   | 1990 | 217    | (145 to 305)        | 8.7                                | (5.9 to 12.3)      |
|                  |         |                    |        | 2013 | 388    | (259 to 541)        | 8.8                                | (5.9 to 12.2)      |
|                  |         | Hemorrhagic Stroke | Male   | 1990 | 41     | (26 to 64)          | 3                                  | (1.9 to 4.4)       |
|                  |         |                    |        | 2013 | 78     | (47 to 118)         | 2.9                                | (1.7 to 4.3)       |
|                  |         |                    | Female | 1990 | 28     | (17 to 41)          | 1.8                                | (1.1 to 2.6)       |
|                  |         |                    |        | 2013 | 51     | (31 to 79)          | 1.9                                | (1.1 to 2.8)       |
|                  |         |                    | Both   | 1990 | 70     | (45 to 100)         | 2.3                                | (1.6 to 3.3)       |
|                  |         |                    | Both   | 2013 | 130    | (82 to 188)         | 2.4                                | (1.5 to 3.4)       |
| Counts, All ages |         |                    |        |      |        |                     | Rate per 100,000, Age-standardized |                    |
| Country          | measure | Stroke Type        | sex    | year | Mean   | 95% UI              | Mean                               | 95% UI             |
| Cambodia         | Deaths  | Ischemic Stroke    | Male   | 1990 | 1,100  | (702 to 1,721)      | 101.2                              | (62.9 to 152.6)    |
|                  |         |                    |        | 2013 | 3,738  | (2,650 to 4,710)    | 105.8                              | (74.8 to 133.2)    |
|                  |         |                    | Female | 1990 | 1,387  | (928 to 1,945)      | 83.4                               | (57.0 to 115.2)    |
|                  |         |                    |        | 2013 | 5,391  | (3,658 to 6,743)    | 107.4                              | (73.4 to 134.0)    |
|                  |         |                    | Both   | 1990 | 2,488  | (1,859 to 3,202)    | 90.7                               | (68.2 to 115.1)    |

|  |        |                    |        |      |         |                      |        |                    |
|--|--------|--------------------|--------|------|---------|----------------------|--------|--------------------|
|  |        |                    |        | 2013 | 9,129   | (6,804 to 10,695)    | 107    | (80.2 to 125.2)    |
|  | Deaths | Hemorrhagic Stroke | Male   | 1990 | 1,860   | (1,215 to 2,423)     | 112.4  | (62.3 to 158.0)    |
|  |        |                    |        | 2013 | 3,415   | (2,461 to 4,745)     | 83.1   | (60.6 to 118.5)    |
|  |        |                    | Female | 1990 | 1,749   | (1,106 to 2,430)     | 85.3   | (53.9 to 120.0)    |
|  |        |                    |        | 2013 | 4,051   | (2,878 to 6,381)     | 75.7   | (54.7 to 120.4)    |
|  |        |                    | Both   | 1990 | 3,610   | (2,711 to 4,389)     | 97.1   | (71.0 to 122.1)    |
|  |        |                    |        | 2013 | 7,466   | (5,863 to 10,474)    | 79.1   | (62.0 to 113.2)    |
|  | DALYs  | Ischemic Stroke    | Male   | 1990 | 26,084  | (17,403 to 41,044)   | 1637.9 | (1048.4 to 2550.6) |
|  |        |                    |        | 2013 | 61,879  | (43,887 to 80,155)   | 1607.9 | (1149.1 to 2064.2) |
|  |        |                    | Female | 1990 | 25,009  | (14,687 to 37,289)   | 1232.4 | (791.1 to 1743.6)  |
|  |        |                    |        | 2013 | 74,237  | (50,772 to 95,778)   | 1445.1 | (998.8 to 1852.9)  |
|  |        |                    | Both   | 1990 | 51,094  | (37,018 to 67,482)   | 1409.7 | (1048.9 to 1818.5) |
|  |        |                    |        | 2013 | 136,117 | (100,312 to 163,382) | 1517.2 | (1128.4 to 1812.6) |
|  |        | Hemorrhagic Stroke | Male   | 1990 | 64,081  | (47,386 to 81,495)   | 2641.4 | (1698.8 to 3462.0) |
|  |        |                    |        | 2013 | 95,033  | (68,572 to 127,997)  | 1936.6 | (1402.1 to 2662.0) |
|  |        |                    | Female | 1990 | 49,488  | (30,006 to 64,786)   | 1838.5 | (1164.0 to 2504.5) |
|  |        |                    |        | 2013 | 91,073  | (64,848 to 133,682)  | 1560.2 | (1106.4 to 2330.7) |
|  |        |                    | Both   | 1990 | 113,569 | (85,910 to 137,698)  | 2204.9 | (1663.6 to 2669.9) |
|  |        |                    |        | 2013 | 186,107 | (148,691 to 241,297) | 1733.6 | (1371.3 to 2294.3) |
|  | YLDs   | Ischemic Stroke    | Male   | 1990 | 338     | (220 to 485)         | 22.7   | (14.7 to 32.2)     |
|  |        |                    |        | 2013 | 1,021   | (664 to 1,426)       | 26.6   | (17.6 to 37.9)     |
|  |        |                    | Female | 1990 | 402     | (254 to 576)         | 20     | (12.5 to 28.8)     |
|  |        |                    |        | 2013 | 1,191   | (728 to 1,726)       | 22.7   | (13.9 to 32.8)     |

|                  |         |                    |        |      |        |                    |                                    |                    |
|------------------|---------|--------------------|--------|------|--------|--------------------|------------------------------------|--------------------|
|                  |         |                    | Both   | 1990 | 740    | (497 to 1,023)     | 21                                 | (13.9 to 28.9)     |
|                  |         |                    |        | 2013 | 2,213  | (1,460 to 3,101)   | 24.3                               | (15.9 to 34.3)     |
|                  |         | Hemorrhagic Stroke | Male   | 1990 | 434    | (281 to 605)       | 25.1                               | (16.7 to 35.2)     |
|                  |         |                    |        | 2013 | 1,205  | (812 to 1,695)     | 28.7                               | (19.3 to 40.4)     |
|                  |         |                    | Female | 1990 | 438    | (283 to 625)       | 19.9                               | (12.7 to 28.3)     |
|                  |         |                    |        | 2013 | 1,186  | (774 to 1,691)     | 21.6                               | (14.0 to 30.5)     |
|                  |         |                    | Both   | 1990 | 873    | (593 to 1,184)     | 22                                 | (15.1 to 30.0)     |
| Counts, All ages |         |                    |        |      |        |                    |                                    |                    |
| Country          | measure | Stroke Type        | sex    | year | Mean   | 95% UI             | Rate per 100,000, Age-standardized |                    |
|                  |         |                    | Both   | 2013 | 2,391  | (1,607 to 3,320)   | 24.6                               | (16.7 to 34.3)     |
| Cameroon         | Deaths  | Ischemic Stroke    | Male   | 1990 | 1,392  | (1,018 to 1,758)   | 76.8                               | (57.1 to 96.9)     |
|                  |         |                    |        | 2013 | 3,585  | (1,986 to 4,791)   | 114.6                              | (65.7 to 150.9)    |
|                  |         |                    | Female | 1990 | 2,024  | (1,443 to 2,840)   | 94.5                               | (67.2 to 134.5)    |
|                  |         |                    |        | 2013 | 3,583  | (2,131 to 4,875)   | 101.3                              | (61.4 to 138.2)    |
|                  |         |                    | Both   | 1990 | 3,417  | (2,754 to 4,344)   | 86.9                               | (70.7 to 110.4)    |
|                  |         |                    |        | 2013 | 7,169  | (4,606 to 9,022)   | 107.7                              | (70.7 to 135.4)    |
|                  | Deaths  | Hemorrhagic Stroke | Male   | 1990 | 1,340  | (877 to 1,738)     | 57.7                               | (37.1 to 76.3)     |
|                  |         |                    |        | 2013 | 2,575  | (1,498 to 4,301)   | 62.3                               | (33.5 to 113.7)    |
|                  |         |                    | Female | 1990 | 1,713  | (1,204 to 2,374)   | 66.5                               | (45.9 to 92.5)     |
|                  |         |                    |        | 2013 | 2,287  | (1,363 to 4,860)   | 52.1                               | (30.0 to 117.3)    |
|                  |         |                    | Both   | 1990 | 3,053  | (2,454 to 3,796)   | 62.6                               | (49.6 to 78.7)     |
|                  |         |                    |        | 2013 | 4,863  | (3,188 to 8,777)   | 57                                 | (35.3 to 110.9)    |
|                  | DALYs   | Ischemic Stroke    | Male   | 1990 | 29,132 | (21,104 to 38,805) | 1230.7                             | (900.4 to 1549.3)  |
|                  |         |                    |        | 2013 | 71,707 | (37,042 to 97,572) | 1827.9                             | (1002.2 to 2466.7) |
|                  |         |                    | Female | 1990 | 37,923 | (26,982 to 53,913) | 1431.5                             | (1019.8 to 2005.0) |
|                  |         |                    |        | 2013 | 60,187 | (35,034 to 85,234) | 1431.7                             | (840.6 to 1968.9)  |

|         |         |                    |        |      |                  |                      |                                    |                    |
|---------|---------|--------------------|--------|------|------------------|----------------------|------------------------------------|--------------------|
|         |         |                    | Both   | 1990 | 67,056           | (52,193 to 88,002)   | 1343.3                             | (1076.8 to 1693.8) |
|         |         |                    |        | 2013 | 131,895          | (80,529 to 167,596)  | 1622.1                             | (1017.6 to 2051.5) |
|         |         | Hemorrhagic Stroke | Male   | 1990 | 41,930           | (27,938 to 53,939)   | 1225.4                             | (815.4 to 1591.3)  |
|         |         |                    |        | 2013 | 81,471           | (51,913 to 123,263)  | 1381.3                             | (809.3 to 2306.6)  |
|         |         |                    | Female | 1990 | 47,096           | (33,518 to 64,633)   | 1348.6                             | (963.7 to 1856.1)  |
|         |         |                    |        | 2013 | 63,193           | (39,954 to 128,170)  | 1062.2                             | (646.4 to 2190.3)  |
|         |         |                    | Both   | 1990 | 89,026           | (70,611 to 110,682)  | 1293.2                             | (1043.4 to 1608.4) |
|         |         |                    |        | 2013 | 144,665          | (101,731 to 237,873) | 1217.2                             | (812.5 to 2159.0)  |
|         | YLDs    | Ischemic Stroke    | Male   | 1990 | 416              | (270 to 597)         | 15.4                               | (10.2 to 22.1)     |
|         |         |                    |        | 2013 | 756              | (499 to 1,057)       | 16                                 | (10.7 to 22.4)     |
|         |         |                    | Female | 1990 | 339              | (221 to 481)         | 11.2                               | (7.2 to 16.0)      |
|         |         |                    |        | 2013 | 600              | (382 to 851)         | 11.4                               | (7.3 to 16.3)      |
|         |         |                    | Both   | 1990 | 756              | (515 to 1,044)       | 13.1                               | (9.1 to 18.1)      |
|         |         |                    |        | 2013 | 1,356            | (920 to 1,859)       | 13.6                               | (9.3 to 18.4)      |
|         |         | Hemorrhagic Stroke | Male   | 1990 | 133              | (82 to 195)          | 4.2                                | (2.6 to 6.2)       |
|         |         |                    |        | 2013 | 232              | (145 to 332)         | 4                                  | (2.5 to 5.7)       |
|         |         |                    | Female | 1990 | 96               | (57 to 140)          | 2.9                                | (1.7 to 4.1)       |
|         |         |                    |        | 2013 | 166              | (104 to 250)         | 2.7                                | (1.7 to 4.2)       |
|         |         |                    |        |      | Counts, All ages |                      | Rate per 100,000, Age-standardized |                    |
| Country | measure | Stroke Type        | sex    | year | Mean             | 95% UI               | Mean                               | 95% UI             |
|         |         |                    | Both   | 1990 | 229              | (148 to 321)         | 3.5                                | (2.3 to 4.9)       |
|         |         |                    | Both   | 2013 | 398              | (257 to 564)         | 3.3                                | (2.2 to 4.7)       |

|        |        |                    |        |      |         |                      |       |                  |
|--------|--------|--------------------|--------|------|---------|----------------------|-------|------------------|
| Canada | Deaths | Ischemic Stroke    | Male   | 1990 | 3,669   | (2,918 to 4,595)     | 32.4  | (25.7 to 40.9)   |
|        |        |                    |        | 2013 | 3,595   | (2,493 to 4,636)     | 14.5  | (10.0 to 18.6)   |
|        |        |                    | Female | 1990 | 5,096   | (3,946 to 6,297)     | 27.6  | (21.4 to 34.1)   |
|        |        |                    |        | 2013 | 6,098   | (4,498 to 8,497)     | 16    | (11.9 to 22.3)   |
|        |        |                    | Both   | 1990 | 8,765   | (7,463 to 10,297)    | 29.8  | (25.4 to 35.1)   |
|        |        |                    |        | 2013 | 9,693   | (7,664 to 12,281)    | 15.6  | (12.3 to 19.6)   |
|        | Deaths | Hemorrhagic Stroke | Male   | 1990 | 2,694   | (2,071 to 3,460)     | 22.2  | (16.7 to 28.6)   |
|        |        |                    |        | 2013 | 3,125   | (1,950 to 4,087)     | 12.7  | (8.0 to 16.5)    |
|        |        |                    | Female | 1990 | 3,491   | (2,726 to 4,626)     | 19.9  | (15.7 to 26.2)   |
|        |        |                    |        | 2013 | 4,708   | (3,195 to 6,133)     | 13.7  | (9.5 to 17.3)    |
|        |        |                    | Both   | 1990 | 6,186   | (5,302 to 7,752)     | 21    | (18.0 to 26.4)   |
|        |        |                    |        | 2013 | 7,834   | (5,781 to 9,439)     | 13.3  | (10.0 to 15.9)   |
|        | DALYs  | Ischemic Stroke    | Male   | 1990 | 63,456  | (51,961 to 76,493)   | 512.5 | (419.5 to 621.1) |
|        |        |                    |        | 2013 | 64,598  | (49,405 to 80,761)   | 267.6 | (205.1 to 334.5) |
|        |        |                    | Female | 1990 | 62,609  | (52,818 to 76,077)   | 356.5 | (299.5 to 432.4) |
|        |        |                    |        | 2013 | 72,506  | (56,515 to 91,590)   | 229.7 | (179.3 to 290.4) |
|        |        |                    | Both   | 1990 | 126,066 | (109,888 to 147,102) | 424   | (369.8 to 494.2) |
|        |        |                    |        | 2013 | 137,104 | (110,955 to 167,209) | 248   | (200.5 to 302.3) |
|        |        | Hemorrhagic Stroke | Male   | 1990 | 52,275  | (42,341 to 66,103)   | 395.1 | (318.3 to 498.8) |
|        |        |                    |        | 2013 | 48,388  | (33,659 to 60,069)   | 204   | (142.5 to 252.6) |
|        |        |                    | Female | 1990 | 54,785  | (45,174 to 70,701)   | 337.5 | (278.8 to 436.1) |
|        |        |                    |        | 2013 | 57,455  | (42,626 to 71,042)   | 203.8 | (152.8 to 252.4) |
|        |        |                    | Both   | 1990 | 107,061 | (94,509 to 128,050)  | 362.5 | (319.6 to 433.7) |
|        |        |                    |        | 2013 | 105,844 | (83,239 to 122,228)  | 203.9 | (161.1 to 234.1) |

|                  | YLDs    | Ischemic Stroke    | Male   | 1990                               | 16,602 | (10,873 to 23,077) | 129.3 | (85.0 to 180.1) |
|------------------|---------|--------------------|--------|------------------------------------|--------|--------------------|-------|-----------------|
|                  |         |                    |        | 2013                               | 28,884 | (19,190 to 41,027) | 120.2 | (80.0 to 170.2) |
|                  |         |                    | Female | 1990                               | 15,758 | (9,838 to 23,339)  | 94.1  | (58.3 to 138.9) |
|                  |         |                    |        | 2013                               | 28,122 | (17,807 to 40,763) | 98    | (61.1 to 141.4) |
|                  |         |                    | Both   | 1990                               | 32,360 | (22,091 to 46,012) | 109.2 | (74.7 to 154.9) |
|                  |         |                    |        | 2013                               | 57,007 | (38,122 to 79,385) | 108.1 | (72.3 to 150.2) |
|                  |         | Hemorrhagic Stroke | Male   | 1990                               | 2,491  | (1,605 to 3,524)   | 18.8  | (12.0 to 26.6)  |
|                  |         |                    |        | 2013                               | 4,251  | (2,651 to 6,166)   | 18.3  | (11.5 to 26.4)  |
|                  |         |                    | Female | 1990                               | 2,998  | (1,836 to 4,519)   | 18.5  | (11.3 to 27.9)  |
|                  |         |                    |        | 2013                               | 5,482  | (3,361 to 7,948)   | 20.6  | (12.7 to 30.1)  |
| Counts, All ages |         |                    |        |                                    |        |                    |       |                 |
|                  |         |                    |        | Rate per 100,000, Age-standardized |        |                    |       |                 |
| Country          | measure | Stroke Type        | sex    | year                               | Mean   | 95% UI             | Mean  | 95% UI          |
|                  |         |                    | Both   | 1990                               | 5,490  | (3,680 to 7,677)   | 18.5  | (12.4 to 26.0)  |
|                  |         |                    | Both   | 2013                               | 9,733  | (6,305 to 13,695)  | 19.4  | (12.5 to 27.4)  |
| Cape Verde       | Deaths  | Ischemic Stroke    | Male   | 1990                               | 88     | (70 to 111)        | 123.8 | (99.2 to 155.3) |
|                  |         |                    |        | 2013                               | 173    | (117 to 241)       | 146.6 | (99.9 to 203.1) |
|                  |         |                    | Female | 1990                               | 101    | (70 to 128)        | 110.5 | (77.4 to 139.4) |
|                  |         |                    |        | 2013                               | 127    | (77 to 259)        | 65.1  | (39.5 to 134.2) |
|                  |         |                    | Both   | 1990                               | 189    | (150 to 228)       | 116.4 | (92.9 to 140.7) |
|                  |         |                    |        | 2013                               | 300    | (218 to 440)       | 97.5  | (70.7 to 143.0) |
|                  | Deaths  | Hemorrhagic Stroke | Male   | 1990                               | 72     | (54 to 98)         | 92.1  | (68.0 to 126.7) |
|                  |         |                    |        | 2013                               | 79     | (44 to 140)        | 59.4  | (32.4 to 107.6) |
|                  |         |                    | Female | 1990                               | 73     | (53 to 102)        | 76.3  | (55.5 to 107.5) |
|                  |         |                    |        | 2013                               | 45     | (17 to 144)        | 24.1  | (9.3 to 76.6)   |
|                  |         |                    | Both   | 1990                               | 146    | (112 to 191)       | 83.1  | (62.9 to 107.7) |
|                  |         |                    |        | 2013                               | 124    | (66 to 253)        | 39.2  | (20.5 to 80.7)  |

|  |       |                    |        |      |       |                  |        |                    |
|--|-------|--------------------|--------|------|-------|------------------|--------|--------------------|
|  | DALYs | Ischemic Stroke    | Male   | 1990 | 1,591 | (1,234 to 2,065) | 1973.3 | (1542.1 to 2527.2) |
|  |       |                    |        | 2013 | 2,853 | (1,817 to 4,139) | 2247.2 | (1453.4 to 3218.0) |
|  |       |                    | Female | 1990 | 1,389 | (948 to 1,836)   | 1375.7 | (950.8 to 1780.3)  |
|  |       |                    |        | 2013 | 1,339 | (802 to 2,953)   | 719    | (415.6 to 1602.8)  |
|  |       |                    | Both   | 1990 | 2,980 | (2,321 to 3,687) | 1630.1 | (1271.4 to 2003.5) |
|  |       |                    |        | 2013 | 4,192 | (2,919 to 6,231) | 1355.1 | (942.4 to 2009.9)  |
|  |       | Hemorrhagic Stroke | Male   | 1990 | 2,000 | (1,527 to 2,682) | 2011.8 | (1548.7 to 2663.2) |
|  |       |                    |        | 2013 | 2,161 | (1,294 to 3,542) | 1314.5 | (754.3 to 2274.2)  |
|  |       |                    | Female | 1990 | 1,391 | (1,002 to 1,976) | 1187.4 | (851.8 to 1698.5)  |
|  |       |                    |        | 2013 | 646   | (233 to 2,068)   | 356.2  | (127.2 to 1148.0)  |
|  |       |                    | Both   | 1990 | 3,392 | (2,660 to 4,477) | 1538.8 | (1205.8 to 2041.5) |
|  |       |                    |        | 2013 | 2,808 | (1,610 to 5,134) | 792.1  | (438.5 to 1506.9)  |
|  | YLDs  | Ischemic Stroke    | Male   | 1990 | 12    | (8 to 18)        | 15.7   | (10.3 to 22.7)     |
|  |       |                    |        | 2013 | 21    | (13 to 32)       | 15.3   | (9.7 to 21.9)      |
|  |       |                    | Female | 1990 | 12    | (8 to 17)        | 11.4   | (7.4 to 15.7)      |
|  |       |                    |        | 2013 | 22    | (14 to 31)       | 11.9   | (7.6 to 17.0)      |
|  |       |                    | Both   | 1990 | 25    | (16 to 33)       | 13.2   | (8.9 to 18.0)      |
|  |       |                    |        | 2013 | 43    | (29 to 60)       | 13.4   | (8.8 to 18.5)      |
|  |       | Hemorrhagic Stroke | Male   | 1990 | 3     | (2 to 5)         | 4.2    | (2.6 to 6.2)       |
|  |       |                    |        | 2013 | 6     | (4 to 9)         | 3.9    | (2.4 to 5.8)       |
|  |       |                    | Female | 1990 | 3     | (2 to 4)         | 2.9    | (1.8 to 4.2)       |
|  |       |                    |        | 2013 | 5     | (3 to 7)         | 2.8    | (1.8 to 4.1)       |
|  |       |                    | Both   | 1990 | 6     | (4 to 9)         | 3.4    | (2.2 to 4.8)       |
|  |       |                    | Both   | 2013 | 11    | (8 to 16)        | 3.3    | (2.2 to 4.6)       |

Counts, All ages

Rate per 100,000, Age-standardized

| Country                  | measure | Stroke Type        | sex    | year   | Mean              | 95% UI             | Mean               | 95% UI             |                    |
|--------------------------|---------|--------------------|--------|--------|-------------------|--------------------|--------------------|--------------------|--------------------|
| Central African Republic | Deaths  | Ischemic Stroke    | Male   | 1990   | 437               | (236 to 638)       | 87.5               | (48.6 to 121.9)    |                    |
|                          |         |                    |        | 2013   | 359               | (113 to 565)       | 50.8               | (16.4 to 78.9)     |                    |
|                          |         |                    |        | Female | 1990              | 713                | (431 to 1,008)     | 121.3              | (72.8 to 170.5)    |
|                          |         |                    |        |        | 2013              | 996                | (329 to 1,666)     | 108.9              | (34.9 to 177.6)    |
|                          |         |                    |        | Both   | 1990              | 1,151              | (726 to 1,474)     | 107.3              | (67.6 to 136.7)    |
|                          |         |                    |        |        | 2013              | 1,356              | (512 to 2,000)     | 84.9               | (32.6 to 124.6)    |
|                          | Deaths  | Hemorrhagic Stroke | Male   | 1990   | 533               | (326 to 756)       | 83.9               | (50.3 to 119.6)    |                    |
| 2013                     |         |                    |        | 428    | (220 to 700)      | 48.7               | (24.1 to 84.2)     |                    |                    |
|                          |         |                    |        | Female | 1990              | 805                | (439 to 1,133)     | 112.3              | (61.2 to 160.2)    |
|                          |         |                    |        |        | 2013              | 1,001              | (353 to 1,651)     | 93                 | (31.7 to 153.9)    |
|                          |         |                    |        | Both   | 1990              | 1,339              | (903 to 1,752)     | 100                | (66.5 to 132.3)    |
|                          |         |                    |        |        |                   | 2013               | 1,429              | (755 to 2,071)     | 73.9               |
|                          | DALYs   | Ischemic Stroke    | Male   | 1990   | 9,296             | (4,958 to 14,782)  | 1469.6             | (788.7 to 2174.5)  |                    |
| 2013                     |         |                    |        | 6,980  | (2,098 to 11,481) | 795.9              | (253.4 to 1261.7)  |                    |                    |
|                          |         |                    |        | Female | 1990              | 12,884             | (7,638 to 19,650)  | 1810.7             | (1093.4 to 2639.1) |
|                          |         |                    |        |        | 2013              | 16,866             | (5,644 to 30,334)  | 1569.7             | (531.8 to 2681.6)  |
|                          |         |                    |        | Both   | 1990              | 22,181             | (13,660 to 29,917) | 1667.1             | (1045.8 to 2147.7) |
|                          |         |                    |        |        |                   | 2013               | 23,847             | (8,643 to 36,230)  | 1238.5             |
|                          |         | Hemorrhagic Stroke | Male   | 1990   | 15,615            | (9,443 to 22,498)  | 1948               | (1173.7 to 2787.6) |                    |
|                          |         |                    |        |        | 2013              | 11,737             | (6,201 to 18,471)  | 1026.6             | (535.1 to 1658.4)  |
|                          |         |                    | Female | 1990   | 20,992            | (11,426 to 29,304) | 2381.1             | (1297.7 to 3355.2) |                    |
|                          |         |                    |        | 2013   | 25,050            | (9,327 to 40,342)  | 1890.8             | (678.5 to 3083.3)  |                    |
|                          |         |                    | Both   | 1990   | 36,608            | (24,813 to 48,419) | 2187.8             | (1487.3 to 2880.3) |                    |
|                          |         |                    |        |        | 2013              | 36,788             | (20,066 to 53,623) | 1501.6             | (808.9 to 2169.7)  |
|                          | YLDs    | Ischemic Stroke    | Male   | 1990   | 105               | (69 to 147)        | 14.7               | (9.7 to 20.4)      |                    |
|                          |         |                    |        |        |                   | 2013               | 150                | (91 to 215)        | 13.9               |



|         |         |                    | Female | 1990 | 90               | (57 to 127)       | 10.8                               | (6.9 to 15.3)     |
|---------|---------|--------------------|--------|------|------------------|-------------------|------------------------------------|-------------------|
|         |         |                    |        | 2013 | 142              | (91 to 203)       | 11.3                               | (7.3 to 16.4)     |
|         |         |                    | Both   | 1990 | 195              | (132 to 266)      | 12.6                               | (8.5 to 17.2)     |
|         |         |                    |        | 2013 | 293              | (194 to 404)      | 12.5                               | (8.2 to 17.2)     |
|         |         | Hemorrhagic Stroke | Male   | 1990 | 31               | (20 to 45)        | 3.8                                | (2.5 to 5.5)      |
|         |         |                    |        | 2013 | 47               | (29 to 70)        | 3.7                                | (2.3 to 5.5)      |
|         |         |                    | Female | 1990 | 24               | (15 to 37)        | 2.7                                | (1.7 to 4.1)      |
|         |         |                    |        | 2013 | 36               | (22 to 56)        | 2.6                                | (1.5 to 4.0)      |
|         |         |                    | Both   | 1990 | 56               | (37 to 80)        | 3.2                                | (2.1 to 4.6)      |
|         |         |                    | Both   | 2013 | 84               | (54 to 119)       | 3.1                                | (2.0 to 4.4)      |
| Chad    | Deaths  | Ischemic Stroke    | Male   | 1990 | 343              | (171 to 538)      | 42.6                               | (21.6 to 64.8)    |
|         |         |                    |        | 2013 | 775              | (210 to 1,253)    | 56.2                               | (16.1 to 88.4)    |
|         |         |                    |        |      | Counts, All ages |                   | Rate per 100,000, Age-standardized |                   |
| Country | measure | Stroke Type        | sex    | year | Mean             | 95% UI            | Mean                               | 95% UI            |
|         |         |                    | Female | 1990 | 519              | (225 to 733)      | 54.3                               | (25.3 to 77.4)    |
|         |         |                    |        | 2013 | 1,115            | (211 to 1,734)    | 71.7                               | (15.1 to 110.5)   |
|         |         |                    | Both   | 1990 | 862              | (492 to 1,157)    | 49.4                               | (28.9 to 66.9)    |
|         |         |                    |        | 2013 | 1,891            | (678 to 2,728)    | 65.1                               | (24.1 to 93.4)    |
|         | Deaths  | Hemorrhagic Stroke | Male   | 1990 | 404              | (210 to 555)      | 37.5                               | (16.6 to 54.5)    |
|         |         |                    |        | 2013 | 618              | (343 to 1,150)    | 31.8                               | (14.9 to 66.9)    |
|         |         |                    | Female | 1990 | 573              | (319 to 808)      | 48.6                               | (26.3 to 72.3)    |
|         |         |                    |        | 2013 | 831              | (478 to 1,582)    | 40.3                               | (21.8 to 85.3)    |
|         |         |                    | Both   | 1990 | 978              | (661 to 1,246)    | 43.8                               | (27.9 to 58.4)    |
|         |         |                    |        | 2013 | 1,449            | (932 to 2,596)    | 36.5                               | (21.5 to 73.1)    |
|         | DALYs   | Ischemic Stroke    | Male   | 1990 | 7,585            | (3,698 to 12,194) | 683.8                              | (342.6 to 1071.8) |

|       |        |                    |        |      |        |                    |        |                   |
|-------|--------|--------------------|--------|------|--------|--------------------|--------|-------------------|
|       |        |                    |        | 2013 | 16,270 | (4,122 to 27,205)  | 889    | (243.8 to 1442.0) |
|       |        |                    | Female | 1990 | 10,090 | (4,194 to 14,549)  | 810.2  | (346.4 to 1132.9) |
|       |        |                    |        | 2013 | 20,195 | (3,721 to 32,145)  | 1025.2 | (198.5 to 1611.5) |
|       |        |                    | Both   | 1990 | 17,675 | (9,978 to 24,111)  | 755.5  | (432.1 to 1011.9) |
|       |        |                    |        | 2013 | 36,466 | (12,897 to 53,663) | 966.2  | (351.7 to 1410.2) |
|       |        | Hemorrhagic Stroke | Male   | 1990 | 13,638 | (8,428 to 18,251)  | 797.9  | (410.5 to 1102.8) |
|       |        |                    |        | 2013 | 21,207 | (13,385 to 34,286) | 688    | (369.6 to 1290.2) |
|       |        |                    | Female | 1990 | 16,673 | (9,701 to 22,316)  | 958.9  | (542.2 to 1328.2) |
|       |        |                    |        | 2013 | 25,253 | (15,307 to 42,886) | 820.8  | (470.7 to 1503.6) |
|       |        |                    | Both   | 1990 | 30,311 | (20,936 to 38,019) | 886.6  | (607.4 to 1132.0) |
|       |        |                    |        | 2013 | 46,460 | (32,224 to 72,862) | 759.1  | (491.1 to 1355.0) |
|       | YLDs   | Ischemic Stroke    | Male   | 1990 | 189    | (118 to 269)       | 15.2   | (9.6 to 21.8)     |
|       |        |                    |        | 2013 | 350    | (224 to 498)       | 15.2   | (9.7 to 22.4)     |
|       |        |                    | Female | 1990 | 154    | (98 to 224)        | 10.9   | (6.9 to 16.1)     |
|       |        |                    |        | 2013 | 277    | (181 to 383)       | 10.8   | (7.1 to 15.2)     |
|       |        |                    | Both   | 1990 | 344    | (229 to 478)       | 12.9   | (8.7 to 17.9)     |
|       |        |                    |        | 2013 | 628    | (419 to 857)       | 12.8   | (8.6 to 17.8)     |
|       |        | Hemorrhagic Stroke | Male   | 1990 | 61     | (38 to 90)         | 4.2    | (2.6 to 6.1)      |
|       |        |                    |        | 2013 | 113    | (73 to 160)        | 3.9    | (2.5 to 5.7)      |
|       |        |                    | Female | 1990 | 43     | (27 to 64)         | 2.7    | (1.7 to 4.1)      |
|       |        |                    |        | 2013 | 79     | (49 to 116)        | 2.6    | (1.6 to 3.7)      |
|       |        |                    | Both   | 1990 | 105    | (68 to 151)        | 3.4    | (2.2 to 4.9)      |
|       |        |                    | Both   | 2013 | 193    | (128 to 268)       | 3.2    | (2.1 to 4.4)      |
| Chile | Deaths | Ischemic Stroke    | Male   | 1990 | 2,559  | (2,026 to 3,079)   | 81.8   | (64.7 to 98.9)    |
|       |        |                    |        | 2013 | 2,890  | (2,246 to 3,758)   | 40.2   | (31.1 to 52.1)    |
|       |        |                    | Female | 1990 | 2,845  | (2,045 to 3,195)   | 61.2   | (44.1 to 68.7)    |

|         |         |                    |        | 2013             | 3,176  | (2,465 to 4,811)    | 28.9                               | (22.5 to 43.9)    |                |
|---------|---------|--------------------|--------|------------------|--------|---------------------|------------------------------------|-------------------|----------------|
|         |         |                    |        | Both             | 1990   | 5,405               | (4,304 to 6,095)                   | 69.8              | (55.9 to 78.4) |
|         |         |                    |        | Counts, All ages |        |                     | Rate per 100,000, Age-standardized |                   |                |
| Country | measure | Stroke Type        | sex    | year             | Mean   | 95% UI              | Mean                               | 95% UI            |                |
|         |         |                    |        | 2013             | 6,067  | (5,014 to 8,191)    | 33.7                               | (28.0 to 45.5)    |                |
|         | Deaths  | Hemorrhagic Stroke | Male   | 1990             | 1,319  | (993 to 1,960)      | 36.9                               | (27.4 to 55.9)    |                |
|         |         |                    |        | 2013             | 2,563  | (1,629 to 3,281)    | 32.7                               | (20.3 to 42.2)    |                |
|         |         |                    | Female | 1990             | 1,450  | (1,216 to 2,198)    | 29.9                               | (25.0 to 45.5)    |                |
|         |         |                    |        | 2013             | 2,602  | (1,753 to 3,254)    | 24.5                               | (16.6 to 30.5)    |                |
|         |         |                    | Both   | 1990             | 2,770  | (2,285 to 3,958)    | 32.9                               | (27.0 to 47.2)    |                |
|         |         |                    |        | 2013             | 5,166  | (3,723 to 6,101)    | 28.2                               | (20.3 to 33.4)    |                |
|         | DALYs   | Ischemic Stroke    | Male   | 1990             | 44,116 | (33,855 to 52,897)  | 1228.8                             | (954.4 to 1468.2) |                |
|         |         |                    |        | 2013             | 40,609 | (31,874 to 54,230)  | 522.9                              | (411.5 to 690.0)  |                |
|         |         |                    | Female | 1990             | 39,281 | (27,426 to 43,804)  | 810.1                              | (567.0 to 902.3)  |                |
|         |         |                    |        | 2013             | 32,714 | (25,988 to 49,787)  | 314.8                              | (250.1 to 482.3)  |                |
|         |         |                    | Both   | 1990             | 83,398 | (65,213 to 94,784)  | 988.9                              | (780.2 to 1121.2) |                |
|         |         |                    |        | 2013             | 73,324 | (60,610 to 98,472)  | 406.8                              | (336.9 to 544.6)  |                |
|         |         | Hemorrhagic Stroke | Male   | 1990             | 31,161 | (24,188 to 44,569)  | 736.4                              | (563.0 to 1070.9) |                |
|         |         |                    |        | 2013             | 51,850 | (34,701 to 64,665)  | 602.6                              | (396.7 to 753.3)  |                |
|         |         |                    | Female | 1990             | 29,714 | (25,639 to 43,617)  | 574.6                              | (495.2 to 840.9)  |                |
|         |         |                    |        | 2013             | 41,652 | (30,732 to 49,890)  | 411                                | (304.0 to 490.7)  |                |
|         |         |                    | Both   | 1990             | 60,875 | (51,251 to 85,035)  | 645.6                              | (539.7 to 905.9)  |                |
|         |         |                    |        | 2013             | 93,503 | (71,125 to 109,059) | 499.8                              | (378.7 to 583.0)  |                |
|         | YLDs    | Ischemic Stroke    | Male   | 1990             | 1,364  | (902 to 1,913)      | 34.1                               | (22.4 to 47.1)    |                |
|         |         |                    |        | 2013             | 2,582  | (1,669 to 3,597)    | 30.5                               | (19.8 to 42.6)    |                |

|         |         |                    |        |      |                  |                      |                                    |                  |
|---------|---------|--------------------|--------|------|------------------|----------------------|------------------------------------|------------------|
|         |         |                    | Female | 1990 | 1,007            | (646 to 1,439)       | 19.9                               | (12.7 to 28.5)   |
|         |         |                    |        | 2013 | 1,837            | (1,183 to 2,602)     | 18.3                               | (11.8 to 25.9)   |
|         |         |                    | Both   | 1990 | 2,371            | (1,613 to 3,219)     | 26.1                               | (17.7 to 35.6)   |
|         |         |                    |        | 2013 | 4,419            | (2,948 to 5,929)     | 23.8                               | (15.9 to 31.9)   |
|         |         | Hemorrhagic Stroke | Male   | 1990 | 514              | (338 to 714)         | 11.4                               | (7.5 to 15.7)    |
|         |         |                    |        | 2013 | 1,133            | (694 to 1,621)       | 13                                 | (8.0 to 18.6)    |
|         |         |                    | Female | 1990 | 308              | (198 to 446)         | 5.8                                | (3.7 to 8.4)     |
|         |         |                    |        | 2013 | 636              | (390 to 931)         | 6.4                                | (3.9 to 9.3)     |
|         |         |                    | Both   | 1990 | 823              | (553 to 1,116)       | 8.3                                | (5.5 to 11.3)    |
|         |         |                    | Both   | 2013 | 1,769            | (1,129 to 2,440)     | 9.4                                | (6.0 to 13.0)    |
| China   | Deaths  | Ischemic Stroke    | Male   | 1990 | 169,156          | (132,718 to 219,389) | 61.8                               | (48.4 to 80.7)   |
|         |         |                    |        | 2013 | 414,113          | (295,377 to 511,239) | 74.7                               | (53.6 to 92.1)   |
|         |         |                    | Female | 1990 | 148,634          | (119,763 to 210,776) | 43.7                               | (35.5 to 62.1)   |
|         |         |                    |        | 2013 | 321,862          | (212,678 to 376,981) | 51.9                               | (34.5 to 60.7)   |
|         |         |                    |        |      | Counts, All ages |                      | Rate per 100,000, Age-standardized |                  |
| Country | measure | Stroke Type        | sex    | year | Mean             | 95% UI               | Mean                               | 95% UI           |
|         |         |                    | Both   | 1990 | 317,791          | (273,999 to 410,202) | 51.6                               | (44.6 to 66.9)   |
|         |         |                    |        | 2013 | 735,976          | (554,470 to 849,199) | 62.9                               | (47.1 to 72.1)   |
|         | Deaths  | Hemorrhagic Stroke | Male   | 1990 | 533,294          | (446,725 to 601,019) | 171.7                              | (141.1 to 193.3) |
|         |         |                    |        | 2013 | 696,125          | (558,315 to 897,513) | 114.2                              | (91.8 to 149.8)  |
|         |         |                    | Female | 1990 | 454,968          | (394,067 to          | 127.9                              | (109.5 to 154.4) |

|  |       |                    |        |      |            |                            |        |                    |
|--|-------|--------------------|--------|------|------------|----------------------------|--------|--------------------|
|  |       |                    |        |      |            | 549,346)                   |        |                    |
|  |       |                    |        | 2013 | 488,586    | (413,673 to 634,569)       | 75.5   | (64.1 to 98.9)     |
|  |       |                    | Both   | 1990 | 988,262    | (869,268 to 1,100,203)     | 148.1  | (130.4 to 164.1)   |
|  |       |                    |        | 2013 | 1,184,712  | (1,024,961 to 1,462,699)   | 94.4   | (81.6 to 117.8)    |
|  | DALYs | Ischemic Stroke    | Male   | 1990 | 3,206,648  | (2,481,710 to 4,143,927)   | 949.5  | (748.7 to 1227.9)  |
|  |       |                    |        | 2013 | 6,655,368  | (4,811,217 to 8,277,431)   | 1041   | (758.8 to 1279.4)  |
|  |       |                    | Female | 1990 | 2,415,466  | (1,913,613 to 3,403,162)   | 645.6  | (515.3 to 906.1)   |
|  |       |                    |        | 2013 | 3,997,838  | (2,748,902 to 4,801,774)   | 602.7  | (413.3 to 719.5)   |
|  |       |                    | Both   | 1990 | 5,622,115  | (4,761,928 to 7,127,920)   | 786.9  | (672.9 to 1000.4)  |
|  |       |                    |        | 2013 | 10,653,207 | (8,141,338 to 12,546,385)  | 816.5  | (619.6 to 954.6)   |
|  |       | Hemorrhagic Stroke | Male   | 1990 | 12,603,438 | (10,629,562 to 14,334,550) | 3199.5 | (2684.2 to 3610.3) |
|  |       |                    |        | 2013 | 14,122,661 | (11,341,678 to 17,652,785) | 1991.6 | (1612.5 to 2510.9) |
|  |       |                    | Female | 1990 | 9,095,120  | (7,811,045 to 11,219,763)  | 2268   | (1951.4 to 2751.1) |
|  |       |                    |        | 2013 | 7,919,171  | (6,615,153 to 9,675,333)   | 1122.3 | (942.3 to 1387.0)  |
|  |       |                    | Both   | 1990 | 21,698,558 | (19,249,450 to 24,229,403) | 2721.6 | (2402.2 to 3018.9) |
|  |       |                    |        | 2013 | 22,041,833 | (19,127,173 to 26,422,172) | 1555.2 | (1351.2 to 1880.9) |
|  | YLDs  | Ischemic Stroke    | Male   | 1990 | 106,328    | (73,769 to                 | 31.5   | (22.0 to 41.9)     |

|          |         |                    |        |      |                  | 142,238)             |                                    |                |
|----------|---------|--------------------|--------|------|------------------|----------------------|------------------------------------|----------------|
|          |         |                    |        | 2013 | 213,407          | (148,523 to 287,707) | 32.4                               | (22.8 to 43.4) |
|          |         |                    | Female | 1990 | 75,481           | (53,145 to 100,282)  | 19.9                               | (14.0 to 26.4) |
|          |         |                    |        | 2013 | 138,263          | (96,931 to 183,697)  | 19.9                               | (13.9 to 26.4) |
|          |         |                    |        |      | Counts, All ages |                      | Rate per 100,000, Age-standardized |                |
| Country  | measure | Stroke Type        | sex    | year | Mean             | 95% UI               | Mean                               | 95% UI         |
|          |         |                    | Both   | 1990 | 181,809          | (126,595 to 241,932) | 25.2                               | (17.6 to 33.3) |
|          |         |                    |        | 2013 | 351,670          | (246,176 to 466,293) | 25.8                               | (18.2 to 34.2) |
|          |         | Hemorrhagic Stroke | Male   | 1990 | 112,782          | (76,025 to 151,680)  | 31.1                               | (21.1 to 41.7) |
|          |         |                    |        | 2013 | 216,225          | (146,306 to 288,504) | 31.3                               | (21.4 to 41.8) |
|          |         |                    | Female | 1990 | 78,590           | (53,851 to 103,914)  | 19.9                               | (13.7 to 26.4) |
|          |         |                    |        | 2013 | 139,468          | (96,479 to 187,873)  | 19.6                               | (13.6 to 26.4) |
|          |         |                    | Both   | 1990 | 191,372          | (130,030 to 255,309) | 25                                 | (17.0 to 33.4) |
|          |         |                    | Both   | 2013 | 355,693          | (246,814 to 473,579) | 25.3                               | (17.6 to 33.8) |
| Colombia | Deaths  | Ischemic Stroke    | Male   | 1990 | 1,973            | (1,409 to 2,396)     | 33.5                               | (23.7 to 41.3) |
|          |         |                    |        | 2013 | 2,147            | (1,512 to 3,609)     | 17.3                               | (12.0 to 29.3) |
|          |         |                    | Female | 1990 | 2,280            | (1,530 to 2,641)     | 30.8                               | (20.8 to 35.7) |
|          |         |                    |        | 2013 | 2,496            | (1,785 to 4,142)     | 15                                 | (10.7 to 24.9) |
|          |         |                    | Both   | 1990 | 4,253            | (3,227 to 4,815)     | 32.1                               | (23.9 to 36.4) |

|         |         |                    |        |      |                  |                      |                                    |                    |
|---------|---------|--------------------|--------|------|------------------|----------------------|------------------------------------|--------------------|
|         |         |                    |        | 2013 | 4,643            | (3,573 to 7,113)     | 16                                 | (12.3 to 24.5)     |
|         | Deaths  | Hemorrhagic Stroke | Male   | 1990 | 4,201            | (3,525 to 5,229)     | 63.6                               | (52.8 to 80.9)     |
|         |         |                    |        | 2013 | 7,612            | (5,713 to 9,860)     | 56.8                               | (42.5 to 73.4)     |
|         |         |                    | Female | 1990 | 4,923            | (4,248 to 6,020)     | 60.3                               | (51.9 to 74.7)     |
|         |         |                    |        | 2013 | 8,516            | (6,517 to 10,514)    | 48.9                               | (37.0 to 60.1)     |
|         |         |                    | Both   | 1990 | 9,124            | (8,279 to 10,758)    | 61.8                               | (55.7 to 73.4)     |
|         |         |                    |        | 2013 | 16,128           | (13,121 to 19,035)   | 52.4                               | (42.6 to 61.8)     |
|         | DALYs   | Ischemic Stroke    | Male   | 1990 | 37,807           | (27,685 to 45,645)   | 513.7                              | (371.0 to 619.0)   |
|         |         |                    |        | 2013 | 35,913           | (25,536 to 57,746)   | 242                                | (172.6 to 393.3)   |
|         |         |                    | Female | 1990 | 37,628           | (25,481 to 43,712)   | 431.6                              | (293.7 to 500.6)   |
|         |         |                    |        | 2013 | 33,795           | (24,259 to 55,345)   | 185.1                              | (133.8 to 304.3)   |
|         |         |                    | Both   | 1990 | 75,436           | (58,368 to 85,191)   | 469                                | (365.4 to 529.7)   |
|         |         |                    |        | 2013 | 69,708           | (53,291 to 104,293)  | 210.6                              | (161.3 to 317.4)   |
|         |         | Hemorrhagic Stroke | Male   | 1990 | 103,353          | (86,926 to 127,604)  | 1205.8                             | (1013.8 to 1493.4) |
|         |         |                    |        | 2013 | 153,826          | (115,070 to 199,768) | 937.4                              | (707.0 to 1213.4)  |
|         |         |                    | Female | 1990 | 112,285          | (95,401 to 134,715)  | 1126.7                             | (967.0 to 1361.8)  |
|         |         |                    |        | 2013 | 146,886          | (114,035 to 184,826) | 747.2                              | (575.3 to 937.1)   |
|         |         |                    |        |      | Counts, All ages |                      | Rate per 100,000, Age-standardized |                    |
| Country | measure | Stroke Type        | sex    | year | Mean             | 95% UI               | Mean                               | 95% UI             |
|         |         |                    | Both   | 1990 | 215,638          | (195,775 to 250,992) | 1161.5                             | (1055.8 to 1360.2) |
|         |         |                    |        | 2013 | 300,712          | (244,769 to 358,842) | 832.8                              | (679.2 to 988.7)   |

|         |        |                    |        |      |       |                  |        |                   |
|---------|--------|--------------------|--------|------|-------|------------------|--------|-------------------|
|         | YLDs   | Ischemic Stroke    | Male   | 1990 | 505   | (317 to 730)     | 6.9    | (4.2 to 10.1)     |
|         |        |                    |        | 2013 | 1,148 | (703 to 1,692)   | 7.2    | (4.4 to 10.6)     |
|         |        |                    | Female | 1990 | 478   | (312 to 705)     | 5.5    | (3.6 to 8.2)      |
|         |        |                    |        | 2013 | 1,139 | (722 to 1,680)   | 5.9    | (3.7 to 8.7)      |
|         |        |                    | Both   | 1990 | 983   | (646 to 1,380)   | 6.1    | (4.1 to 8.6)      |
|         |        |                    |        | 2013 | 2,287 | (1,490 to 3,251) | 6.5    | (4.2 to 9.2)      |
|         |        | Hemorrhagic Stroke | Male   | 1990 | 1,642 | (1,104 to 2,255) | 19.4   | (12.9 to 26.6)    |
|         |        |                    |        | 2013 | 3,578 | (2,346 to 5,157) | 20.4   | (13.6 to 29.1)    |
|         |        |                    | Female | 1990 | 1,248 | (814 to 1,752)   | 12.8   | (8.3 to 17.9)     |
|         |        |                    |        | 2013 | 2,605 | (1,675 to 3,720) | 12.5   | (8.1 to 17.7)     |
|         |        |                    | Both   | 1990 | 2,891 | (1,967 to 3,848) | 15.8   | (10.7 to 20.9)    |
|         |        |                    | Both   | 2013 | 6,183 | (4,171 to 8,522) | 16     | (10.9 to 21.9)    |
| Comoros | Deaths | Ischemic Stroke    | Male   | 1990 | 58    | (17 to 102)      | 111.1  | (34.6 to 184.0)   |
|         |        |                    |        | 2013 | 90    | (26 to 148)      | 99.7   | (33.2 to 158.5)   |
|         |        |                    | Female | 1990 | 71    | (22 to 119)      | 111.2  | (34.9 to 180.0)   |
|         |        |                    |        | 2013 | 96    | (33 to 153)      | 91.6   | (33.0 to 144.4)   |
|         |        |                    | Both   | 1990 | 129   | (48 to 194)      | 111.7  | (42.6 to 163.7)   |
|         |        |                    |        | 2013 | 186   | (72 to 269)      | 95.6   | (38.0 to 134.4)   |
|         | Deaths | Hemorrhagic Stroke | Male   | 1990 | 96    | (58 to 152)      | 140.8  | (84.9 to 224.4)   |
|         |        |                    |        | 2013 | 157   | (93 to 249)      | 130.8  | (77.0 to 208.6)   |
|         |        |                    | Female | 1990 | 116   | (67 to 171)      | 148.5  | (87.7 to 217.6)   |
|         |        |                    |        | 2013 | 152   | (88 to 256)      | 118.8  | (69.9 to 206.6)   |
|         |        |                    | Both   | 1990 | 212   | (144 to 293)     | 145.6  | (99.3 to 201.5)   |
|         |        |                    |        | 2013 | 309   | (206 to 471)     | 124.8  | (83.8 to 198.1)   |
|         | DALYs  | Ischemic Stroke    | Male   | 1990 | 1,162 | (326 to 2,103)   | 1720.3 | (509.8 to 3011.6) |
|         |        |                    |        | 2013 | 1,784 | (517 to 3,047)   | 1515.8 | (458.2 to 2484.9) |
|         |        |                    | Female | 1990 | 1,223 | (361 to 2,161)   | 1583.4 | (487.2 to 2715.3) |



|                  |         |                    |        | 2013 | 1,574 | (531 to 2,641)    | 1260.5                             | (439.8 to 2029.5)  |
|------------------|---------|--------------------|--------|------|-------|-------------------|------------------------------------|--------------------|
|                  |         |                    | Both   | 1990 | 2,386 | (847 to 3,719)    | 1653.4                             | (616.0 to 2500.1)  |
|                  |         |                    |        | 2013 | 3,359 | (1,274 to 5,003)  | 1384.6                             | (541.1 to 2003.7)  |
|                  |         | Hemorrhagic Stroke | Male   | 1990 | 2,621 | (1,634 to 4,139)  | 2917.3                             | (1760.9 to 4669.9) |
|                  |         |                    |        | 2013 | 4,194 | (2,447 to 6,521)  | 2620.4                             | (1540.0 to 4154.2) |
|                  |         |                    | Female | 1990 | 2,766 | (1,620 to 4,195)  | 2889.4                             | (1677.4 to 4303.0) |
|                  |         |                    |        | 2013 | 3,445 | (2,031 to 5,672)  | 2168.3                             | (1265.8 to 3598.7) |
|                  |         |                    | Both   | 1990 | 5,387 | (3,673 to 7,425)  | 2913.8                             | (1974.8 to 4045.0) |
| Counts, All ages |         |                    |        |      |       |                   |                                    |                    |
| Country          | measure | Stroke Type        | sex    | year | Mean  | 95% UI            | Rate per 100,000, Age-standardized | 95% UI             |
|                  |         |                    |        | 2013 | 7,640 | (5,170 to 11,254) | 2392                               | (1593.4 to 3612.6) |
|                  | YLDs    | Ischemic Stroke    | Male   | 1990 | 9     | (5 to 14)         | 10                                 | (6.2 to 14.8)      |
|                  |         |                    |        | 2013 | 18    | (11 to 27)        | 10.9                               | (7.2 to 16.2)      |
|                  |         |                    | Female | 1990 | 7     | (4 to 10)         | 7.1                                | (4.5 to 10.2)      |
|                  |         |                    |        | 2013 | 14    | (8 to 21)         | 7.7                                | (4.7 to 11.3)      |
|                  |         |                    | Both   | 1990 | 16    | (10 to 23)        | 8.4                                | (5.5 to 11.7)      |
|                  |         |                    |        | 2013 | 33    | (21 to 47)        | 9.2                                | (6.0 to 13.2)      |
|                  |         | Hemorrhagic Stroke | Male   | 1990 | 3     | (1 to 4)          | 2.8                                | (1.7 to 4.1)       |
|                  |         |                    |        | 2013 | 6     | (3 to 9)          | 2.9                                | (1.8 to 4.4)       |
|                  |         |                    | Female | 1990 | 2     | (1 to 3)          | 1.8                                | (1.1 to 2.6)       |
|                  |         |                    |        | 2013 | 4     | (2 to 6)          | 1.9                                | (1.1 to 2.8)       |
|                  |         |                    | Both   | 1990 | 5     | (3 to 7)          | 2.2                                | (1.5 to 3.2)       |
|                  |         |                    | Both   | 2013 | 10    | (6 to 14)         | 2.4                                | (1.5 to 3.4)       |
| Congo            | Deaths  | Ischemic Stroke    | Male   | 1990 | 574   | (392 to 726)      | 149.7                              | (102.9 to 185.5)   |
|                  |         |                    |        | 2013 | 880   | (619 to 1,146)    | 133.5                              | (93.4 to 171.7)    |
|                  |         |                    | Female | 1990 | 643   | (409 to 817)      | 149.1                              | (97.6 to 186.6)    |



|            |        |                    |        |      |       |                   |       |                  |
|------------|--------|--------------------|--------|------|-------|-------------------|-------|------------------|
|            |        |                    | Both   | 1990 | 150   | (101 to 205)      | 12.8  | (8.7 to 17.6)    |
|            |        |                    |        | 2013 | 266   | (180 to 368)      | 12.4  | (8.4 to 17.2)    |
|            |        | Hemorrhagic Stroke | Male   | 1990 | 24    | (15 to 37)        | 3.8   | (2.4 to 5.7)     |
|            |        |                    |        | 2013 | 45    | (29 to 69)        | 3.6   | (2.3 to 5.5)     |
|            |        |                    | Female | 1990 | 18    | (11 to 27)        | 2.7   | (1.7 to 4.0)     |
|            |        |                    |        | 2013 | 32    | (20 to 48)        | 2.5   | (1.6 to 3.7)     |
|            |        |                    | Both   | 1990 | 43    | (28 to 60)        | 3.3   | (2.1 to 4.6)     |
|            |        |                    | Both   | 2013 | 78    | (50 to 112)       | 3.1   | (2.0 to 4.4)     |
| Costa Rica | Deaths | Ischemic Stroke    | Male   | 1990 | 261   | (165 to 336)      | 38.4  | (24.3 to 49.8)   |
|            |        |                    |        | 2013 | 243   | (153 to 444)      | 15.2  | (9.6 to 27.6)    |
|            |        |                    | Female | 1990 | 305   | (185 to 356)      | 39.3  | (23.8 to 45.9)   |
|            |        |                    |        | 2013 | 261   | (175 to 492)      | 13.3  | (8.9 to 25.0)    |
|            |        |                    | Both   | 1990 | 566   | (375 to 676)      | 39    | (25.8 to 46.6)   |
|            |        |                    |        | 2013 | 504   | (346 to 856)      | 14.2  | (9.7 to 24.1)    |
|            | Deaths | Hemorrhagic Stroke | Male   | 1990 | 152   | (105 to 257)      | 20.6  | (13.9 to 36.4)   |
|            |        |                    |        | 2013 | 463   | (260 to 604)      | 27.6  | (15.2 to 36.2)   |
|            |        |                    | Female | 1990 | 178   | (139 to 310)      | 21.8  | (16.7 to 39.0)   |
|            |        |                    |        | 2013 | 515   | (307 to 625)      | 25.9  | (15.3 to 31.4)   |
|            |        |                    | Both   | 1990 | 330   | (252 to 539)      | 21.3  | (15.9 to 35.7)   |
|            |        |                    |        | 2013 | 979   | (623 to 1,181)    | 26.7  | (16.7 to 32.3)   |
|            | DALYs  | Ischemic Stroke    | Male   | 1990 | 4,004 | (2,509 to 5,081)  | 506.9 | (319.9 to 643.8) |
|            |        |                    |        | 2013 | 3,350 | (2,223 to 5,942)  | 188.4 | (124.7 to 333.1) |
|            |        |                    | Female | 1990 | 4,089 | (2,409 to 4,739)  | 482.3 | (286.8 to 559.6) |
|            |        |                    |        | 2013 | 2,877 | (2,016 to 5,374)  | 143.8 | (100.6 to 267.7) |
|            |        |                    | Both   | 1990 | 8,093 | (5,300 to 9,704)  | 494.6 | (326.2 to 590.9) |
|            |        |                    |        | 2013 | 6,228 | (4,456 to 10,611) | 165   | (118.0 to 280.3) |
|            |        | Hemorrhagic        | Male   | 1990 | 3,339 | (2,505 to 5,133)  | 370.9 | (271.8 to 582.4) |

|               |         | Stroke             |        |                  |        |                    |                                    |                  |
|---------------|---------|--------------------|--------|------------------|--------|--------------------|------------------------------------|------------------|
|               |         |                    |        | 2013             | 8,099  | (5,160 to 10,273)  | 416.9                              | (261.0 to 533.0) |
|               |         |                    | Female | 1990             | 3,510  | (2,962 to 5,417)   | 375.6                              | (312.6 to 592.7) |
|               |         |                    |        | 2013             | 7,280  | (4,993 to 8,457)   | 348                                | (235.1 to 404.3) |
|               |         |                    | Both   | 1990             | 6,849  | (5,628 to 9,970)   | 373.2                              | (300.8 to 558.8) |
|               |         |                    |        | 2013             | 15,379 | (10,973 to 18,112) | 381.3                              | (267.1 to 452.3) |
|               | YLDs    | Ischemic Stroke    | Male   | 1990             | 59     | (35 to 87)         | 7.2                                | (4.4 to 10.9)    |
|               |         |                    |        | 2013             | 133    | (75 to 200)        | 7                                  | (4.0 to 10.5)    |
|               |         |                    | Female | 1990             | 48     | (30 to 71)         | 5.7                                | (3.6 to 8.4)     |
|               |         |                    |        | 2013             | 119    | (72 to 180)        | 5.8                                | (3.5 to 8.9)     |
|               |         |                    | Both   | 1990             | 107    | (70 to 153)        | 6.5                                | (4.2 to 9.2)     |
|               |         |                    |        | 2013             | 253    | (164 to 354)       | 6.4                                | (4.1 to 9.0)     |
|               |         |                    |        | Counts, All ages |        |                    | Rate per 100,000, Age-standardized |                  |
| Country       | measure | Stroke Type        | sex    | year             | Mean   | 95% UI             | Mean                               | 95% UI           |
|               |         | Hemorrhagic Stroke | Male   | 1990             | 181    | (120 to 252)       | 20.1                               | (13.4 to 28.2)   |
|               |         |                    |        | 2013             | 431    | (284 to 614)       | 20.8                               | (13.6 to 29.3)   |
|               |         |                    | Female | 1990             | 118    | (78 to 167)        | 12.8                               | (8.4 to 18.0)    |
|               |         |                    |        | 2013             | 275    | (177 to 393)       | 12.8                               | (8.2 to 18.4)    |
|               |         |                    | Both   | 1990             | 300    | (203 to 413)       | 16.4                               | (11.0 to 22.5)   |
|               |         |                    | Both   | 2013             | 707    | (477 to 949)       | 16.7                               | (11.2 to 22.4)   |
| Cote d'Ivoire | Deaths  | Ischemic Stroke    | Male   | 1990             | 1,761  | (1,305 to 2,335)   | 96                                 | (72.7 to 121.6)  |
|               |         |                    |        | 2013             | 3,994  | (2,171 to 5,428)   | 121.8                              | (72.2 to 160.5)  |
|               |         |                    | Female | 1990             | 1,347  | (873 to 1,881)     | 91.3                               | (59.8 to 128.0)  |
|               |         |                    |        | 2013             | 3,068  | (2,041 to 4,111)   | 123.4                              | (85.5 to 161.6)  |
|               |         |                    | Both   | 1990             | 3,109  | (2,451 to 3,973)   | 94.2                               | (77.3 to 119.7)  |
|               |         |                    |        | 2013             | 7,063  | (4,792 to 8,778)   | 122.8                              | (87.5 to 149.9)  |
|               | Deaths  | Hemorrhagic        | Male   | 1990             | 1,874  | (1,341 to 2,411)   | 73.9                               | (51.6 to 95.1)   |

|  |       |                    |        |      |         |                      |        |                    |
|--|-------|--------------------|--------|------|---------|----------------------|--------|--------------------|
|  |       | Stroke             |        |      |         |                      |        |                    |
|  |       |                    |        | 2013 | 2,665   | (1,661 to 4,859)     | 59.8   | (34.7 to 116.8)    |
|  |       |                    | Female | 1990 | 1,325   | (893 to 1,776)       | 66.8   | (45.5 to 89.9)     |
|  |       |                    |        | 2013 | 1,917   | (1,256 to 3,370)     | 53.9   | (33.8 to 104.0)    |
|  |       |                    | Both   | 1990 | 3,199   | (2,605 to 3,893)     | 70.9   | (57.2 to 86.2)     |
|  |       |                    |        | 2013 | 4,583   | (3,266 to 7,510)     | 57.1   | (38.7 to 101.8)    |
|  | DALYs | Ischemic Stroke    | Male   | 1990 | 41,788  | (29,631 to 59,549)   | 1622.6 | (1210.5 to 2141.4) |
|  |       |                    |        | 2013 | 86,966  | (44,263 to 120,790)  | 1990.7 | (1095.0 to 2697.7) |
|  |       |                    | Female | 1990 | 27,691  | (17,225 to 39,496)   | 1367.2 | (892.2 to 1902.8)  |
|  |       |                    |        | 2013 | 59,847  | (39,357 to 82,343)   | 1791.4 | (1191.2 to 2397.0) |
|  |       |                    | Both   | 1990 | 69,480  | (52,933 to 91,627)   | 1509.8 | (1193.7 to 1919.8) |
|  |       |                    |        | 2013 | 146,813 | (94,299 to 187,848)  | 1900.6 | (1292.1 to 2353.7) |
|  |       | Hemorrhagic Stroke | Male   | 1990 | 63,074  | (45,536 to 79,673)   | 1668.1 | (1190.1 to 2149.3) |
|  |       |                    |        | 2013 | 84,343  | (56,342 to 134,503)  | 1363.9 | (861.0 to 2456.5)  |
|  |       |                    | Female | 1990 | 41,108  | (26,447 to 54,985)   | 1353.9 | (919.2 to 1816.9)  |
|  |       |                    |        | 2013 | 58,309  | (39,548 to 96,556)   | 1127.3 | (741.2 to 1975.8)  |
|  |       |                    | Both   | 1990 | 104,182 | (82,544 to 126,648)  | 1527.1 | (1247.0 to 1860.3) |
|  |       |                    |        | 2013 | 142,653 | (107,414 to 214,309) | 1252.6 | (895.3 to 2030.8)  |
|  | YLDs  | Ischemic Stroke    | Male   | 1990 | 463     | (299 to 659)         | 15.4   | (10.0 to 21.6)     |
|  |       |                    |        | 2013 | 777     | (486 to 1,159)       | 14.8   | (9.1 to 22.4)      |
|  |       |                    | Female | 1990 | 292     | (190 to 407)         | 11.6   | (7.8 to 15.9)      |
|  |       |                    |        | 2013 | 533     | (346 to 767)         | 11.6   | (7.6 to 16.9)      |
|  |       |                    | Both   | 1990 | 755     | (505 to 1,044)       | 13.6   | (9.3 to 18.5)      |
|  |       |                    |        | 2013 | 1,310   | (857 to 1,860)       | 13.4   | (8.7 to 19.1)      |

| Country | measure | Stroke Type        | sex    | year | Counts, All ages |                     | Rate per 100,000, Age-standardized |                    |
|---------|---------|--------------------|--------|------|------------------|---------------------|------------------------------------|--------------------|
|         |         |                    |        |      | Mean             | 95% UI              | Mean                               | 95% UI             |
|         |         | Hemorrhagic Stroke | Male   | 1990 | 154              | (95 to 224)         | 4.3                                | (2.7 to 6.2)       |
|         |         |                    |        | 2013 | 232              | (148 to 346)        | 3.8                                | (2.4 to 5.7)       |
|         |         |                    | Female | 1990 | 85               | (54 to 125)         | 2.9                                | (1.9 to 4.2)       |
|         |         |                    |        | 2013 | 147              | (93 to 218)         | 2.7                                | (1.7 to 4.0)       |
|         |         |                    | Both   | 1990 | 240              | (159 to 334)        | 3.7                                | (2.4 to 5.0)       |
|         |         |                    | Both   | 2013 | 380              | (257 to 537)        | 3.3                                | (2.2 to 4.7)       |
| Croatia | Deaths  | Ischemic Stroke    | Male   | 1990 | 2,933            | (2,541 to 3,408)    | 157.3                              | (136.0 to 182.3)   |
|         |         |                    |        | 2013 | 2,718            | (2,230 to 3,145)    | 91.2                               | (75.0 to 105.6)    |
|         |         |                    | Female | 1990 | 4,046            | (3,451 to 4,773)    | 118.8                              | (100.6 to 139.6)   |
|         |         |                    |        | 2013 | 3,882            | (3,229 to 4,622)    | 69                                 | (57.4 to 81.8)     |
|         |         |                    | Both   | 1990 | 6,980            | (6,240 to 7,852)    | 133.3                              | (119.3 to 150.1)   |
|         |         |                    |        | 2013 | 6,601            | (5,794 to 7,419)    | 78.1                               | (68.5 to 87.7)     |
|         | Deaths  | Hemorrhagic Stroke | Male   | 1990 | 1,172            | (934 to 1,446)      | 49.4                               | (39.1 to 61.8)     |
|         |         |                    |        | 2013 | 865              | (638 to 1,097)      | 28.7                               | (21.1 to 36.6)     |
|         |         |                    | Female | 1990 | 1,442            | (1,057 to 1,703)    | 41.5                               | (30.8 to 49.3)     |
|         |         |                    |        | 2013 | 991              | (776 to 1,456)      | 21.6                               | (17.6 to 31.1)     |
|         |         |                    | Both   | 1990 | 2,614            | (2,130 to 2,986)    | 45.2                               | (36.9 to 51.6)     |
|         |         |                    |        | 2013 | 1,857            | (1,578 to 2,320)    | 24.9                               | (21.3 to 30.9)     |
|         | DALYs   | Ischemic Stroke    | Male   | 1990 | 43,859           | (37,568 to 51,340)  | 2116.7                             | (1828.0 to 2466.0) |
|         |         |                    |        | 2013 | 34,899           | (28,803 to 40,196)  | 1133.7                             | (934.9 to 1308.9)  |
|         |         |                    | Female | 1990 | 46,537           | (39,598 to 54,502)  | 1365.6                             | (1163.9 to 1584.2) |
|         |         |                    |        | 2013 | 35,759           | (30,235 to 42,779)  | 684.7                              | (573.2 to 823.5)   |
|         |         |                    | Both   | 1990 | 90,396           | (80,774 to 101,705) | 1664.2                             | (1492.4 to 1871.0) |
|         |         |                    |        | 2013 | 70,658           | (62,331 to 79,434)  | 874.4                              | (765.7 to 984.7)   |

|         |         |                    |        |      |                  |                    |                                    |                   |
|---------|---------|--------------------|--------|------|------------------|--------------------|------------------------------------|-------------------|
|         |         | Hemorrhagic Stroke | Male   | 1990 | 29,845           | (23,697 to 35,797) | 1165.1                             | (931.3 to 1406.1) |
|         |         |                    |        | 2013 | 18,090           | (13,771 to 22,385) | 609.9                              | (465.7 to 751.5)  |
|         |         |                    | Female | 1990 | 29,785           | (22,410 to 34,900) | 888.3                              | (676.4 to 1036.0) |
|         |         |                    |        | 2013 | 15,437           | (12,944 to 21,833) | 408.1                              | (344.0 to 569.6)  |
|         |         |                    | Both   | 1990 | 59,630           | (49,560 to 67,301) | 1018.4                             | (849.4 to 1144.3) |
|         |         |                    |        | 2013 | 33,527           | (29,077 to 41,123) | 502.2                              | (438.0 to 613.3)  |
|         | YLDs    | Ischemic Stroke    | Male   | 1990 | 621              | (398 to 922)       | 25.3                               | (16.1 to 37.1)    |
|         |         |                    |        | 2013 | 764              | (507 to 1,122)     | 25.8                               | (17.1 to 38.0)    |
|         |         |                    | Female | 1990 | 528              | (334 to 748)       | 16.1                               | (10.3 to 22.7)    |
|         |         |                    |        | 2013 | 599              | (382 to 882)       | 15.4                               | (9.8 to 22.4)     |
|         |         |                    | Both   | 1990 | 1,149            | (756 to 1,603)     | 20.1                               | (13.2 to 28.0)    |
|         |         |                    |        | 2013 | 1,363            | (928 to 1,900)     | 20.2                               | (13.7 to 28.1)    |
|         |         | Hemorrhagic Stroke | Male   | 1990 | 135              | (82 to 203)        | 5.4                                | (3.3 to 8.1)      |
|         |         |                    |        | 2013 | 156              | (92 to 230)        | 5.6                                | (3.4 to 8.3)      |
|         |         |                    |        |      | Counts, All ages |                    | Rate per 100,000, Age-standardized |                   |
| Country | measure | Stroke Type        | sex    | year | Mean             | 95% UI             | Mean                               | 95% UI            |
|         |         |                    | Female | 1990 | 106              | (61 to 168)        | 3.5                                | (2.0 to 5.4)      |
|         |         |                    |        | 2013 | 134              | (81 to 206)        | 4                                  | (2.4 to 6.0)      |
|         |         |                    | Both   | 1990 | 242              | (153 to 361)       | 4.3                                | (2.8 to 6.4)      |
|         |         |                    | Both   | 2013 | 291              | (192 to 413)       | 4.7                                | (3.1 to 6.8)      |
| Cuba    | Deaths  | Ischemic Stroke    | Male   | 1990 | 3,059            | (2,500 to 3,784)   | 69.1                               | (56.4 to 85.5)    |
|         |         |                    |        | 2013 | 3,492            | (2,466 to 4,359)   | 50.7                               | (35.8 to 63.2)    |
|         |         |                    | Female | 1990 | 3,383            | (2,844 to 4,230)   | 67.1                               | (56.4 to 83.9)    |
|         |         |                    |        | 2013 | 4,049            | (2,644 to 4,870)   | 46.1                               | (30.1 to 55.2)    |
|         |         |                    | Both   | 1990 | 6,443            | (5,717 to 7,474)   | 68.1                               | (60.4 to 78.9)    |
|         |         |                    |        | 2013 | 7,541            | (5,526 to 8,801)   | 48.4                               | (35.4 to 56.5)    |
|         | Deaths  | Hemorrhagic        | Male   | 1990 | 1,228            | (970 to 1,609)     | 27.5                               | (21.7 to 36.0)    |

|  |       |                    |        |      |        |                     |        |                   |
|--|-------|--------------------|--------|------|--------|---------------------|--------|-------------------|
|  |       | Stroke             |        |      |        |                     |        |                   |
|  |       |                    |        | 2013 | 1,891  | (1,446 to 2,602)    | 26.8   | (20.5 to 37.0)    |
|  |       |                    | Female | 1990 | 1,426  | (1,173 to 1,963)    | 29.3   | (24.2 to 40.1)    |
|  |       |                    |        | 2013 | 1,980  | (1,440 to 2,801)    | 23.9   | (17.3 to 33.8)    |
|  |       |                    | Both   | 1990 | 2,655  | (2,304 to 3,335)    | 28.4   | (24.7 to 35.7)    |
|  |       |                    |        | 2013 | 3,871  | (3,132 to 5,131)    | 25.4   | (20.6 to 33.6)    |
|  | DALYs | Ischemic Stroke    | Male   | 1990 | 46,172 | (37,424 to 56,010)  | 1037.2 | (842.5 to 1258.1) |
|  |       |                    |        | 2013 | 47,306 | (33,578 to 58,733)  | 676.6  | (480.8 to 838.9)  |
|  |       |                    | Female | 1990 | 44,965 | (37,009 to 54,301)  | 917.7  | (751.4 to 1106.0) |
|  |       |                    |        | 2013 | 43,514 | (28,943 to 51,647)  | 525.5  | (347.8 to 623.3)  |
|  |       |                    | Both   | 1990 | 91,137 | (79,538 to 104,081) | 975.8  | (850.5 to 1113.7) |
|  |       |                    |        | 2013 | 90,821 | (66,453 to 105,712) | 598.6  | (435.5 to 697.3)  |
|  |       | Hemorrhagic Stroke | Male   | 1990 | 27,528 | (22,449 to 35,655)  | 599.4  | (489.0 to 779.3)  |
|  |       |                    |        | 2013 | 38,746 | (30,804 to 50,492)  | 538.3  | (428.7 to 702.0)  |
|  |       |                    | Female | 1990 | 29,842 | (25,488 to 39,691)  | 623.9  | (532.8 to 830.0)  |
|  |       |                    |        | 2013 | 33,091 | (24,772 to 44,293)  | 425.8  | (319.0 to 570.2)  |
|  |       |                    | Both   | 1990 | 57,371 | (51,028 to 70,708)  | 611.7  | (543.7 to 754.0)  |
|  |       |                    |        | 2013 | 71,838 | (60,468 to 88,476)  | 481.7  | (405.5 to 593.6)  |
|  | YLDs  | Ischemic Stroke    | Male   | 1990 | 2,022  | (1,295 to 2,904)    | 45.5   | (29.0 to 65.4)    |
|  |       |                    |        | 2013 | 3,009  | (2,029 to 4,251)    | 42.9   | (28.8 to 60.7)    |
|  |       |                    | Female | 1990 | 1,540  | (980 to 2,222)      | 31.6   | (20.2 to 45.5)    |
|  |       |                    |        | 2013 | 2,598  | (1,662 to 3,807)    | 32.5   | (21.0 to 47.2)    |
|  |       |                    | Both   | 1990 | 3,563  | (2,408 to 4,956)    | 38.2   | (25.9 to 53.2)    |
|  |       |                    |        | 2013 | 5,608  | (3,774 to 7,742)    | 37.4   | (25.4 to 51.7)    |
|  |       | Hemorrhagic Stroke | Male   | 1990 | 624    | (388 to 878)        | 13.7   | (8.5 to 19.4)     |



|         |         |                    |        |      |                  |                  |                                    |                   |
|---------|---------|--------------------|--------|------|------------------|------------------|------------------------------------|-------------------|
|         |         |                    |        | 2013 | 950              | (564 to 1,471)   | 13.6                               | (8.1 to 21.0)     |
|         |         |                    | Female | 1990 | 487              | (307 to 698)     | 10                                 | (6.3 to 14.3)     |
|         |         |                    |        | 2013 | 819              | (510 to 1,240)   | 10.6                               | (6.6 to 15.9)     |
|         |         |                    |        |      | Counts, All ages |                  | Rate per 100,000, Age-standardized |                   |
| Country | measure | Stroke Type        | sex    | year | Mean             | 95% UI           | Mean                               | 95% UI            |
|         |         |                    | Both   | 1990 | 1,112            | (729 to 1,513)   | 11.8                               | (7.7 to 16.0)     |
|         |         |                    | Both   | 2013 | 1,769            | (1,162 to 2,520) | 12                                 | (7.9 to 17.1)     |
| Cyprus  | Deaths  | Ischemic Stroke    | Male   | 1990 | 195              | (124 to 248)     | 63.9                               | (40.9 to 81.1)    |
|         |         |                    |        | 2013 | 136              | (104 to 177)     | 24.7                               | (19.0 to 32.1)    |
|         |         |                    | Female | 1990 | 252              | (146 to 321)     | 64.3                               | (37.6 to 81.6)    |
|         |         |                    |        | 2013 | 196              | (154 to 272)     | 24.8                               | (19.7 to 34.3)    |
|         |         |                    | Both   | 1990 | 448              | (298 to 541)     | 64.4                               | (43.2 to 77.7)    |
|         |         |                    |        | 2013 | 333              | (283 to 415)     | 25                                 | (21.3 to 31.1)    |
|         | Deaths  | Hemorrhagic Stroke | Male   | 1990 | 156              | (106 to 200)     | 50.9                               | (34.7 to 65.3)    |
|         |         |                    |        | 2013 | 103              | (79 to 133)      | 19.1                               | (14.7 to 24.6)    |
|         |         |                    | Female | 1990 | 167              | (91 to 220)      | 44.7                               | (25.0 to 58.1)    |
|         |         |                    |        | 2013 | 123              | (96 to 180)      | 16.9                               | (13.5 to 24.3)    |
|         |         |                    | Both   | 1990 | 323              | (219 to 397)     | 47.7                               | (32.6 to 58.1)    |
|         |         |                    |        | 2013 | 227              | (191 to 294)     | 18.1                               | (15.3 to 23.3)    |
|         | DALYs   | Ischemic Stroke    | Male   | 1990 | 2,478            | (1,706 to 3,018) | 813.2                              | (561.1 to 991.6)  |
|         |         |                    |        | 2013 | 1,867            | (1,498 to 2,324) | 343.7                              | (276.8 to 427.4)  |
|         |         |                    | Female | 1990 | 2,528            | (1,589 to 3,111) | 681.6                              | (432.1 to 838.1)  |
|         |         |                    |        | 2013 | 1,873            | (1,552 to 2,466) | 265.9                              | (220.8 to 347.0)  |
|         |         |                    | Both   | 1990 | 5,006            | (3,554 to 5,853) | 743.9                              | (528.5 to 870.1)  |
|         |         |                    |        | 2013 | 3,741            | (3,225 to 4,473) | 302.6                              | (260.3 to 361.9)  |
|         |         | Hemorrhagic Stroke | Male   | 1990 | 2,894            | (2,097 to 3,536) | 934.8                              | (679.0 to 1141.2) |
|         |         |                    |        | 2013 | 1,701            | (1,370 to 2,133) | 332.7                              | (268.9 to 414.5)  |

|                |         |                    |        |                  |        |                    |                                    |                  |
|----------------|---------|--------------------|--------|------------------|--------|--------------------|------------------------------------|------------------|
|                |         |                    | Female | 1990             | 2,618  | (1,677 to 3,180)   | 752.7                              | (485.9 to 907.9) |
|                |         |                    |        | 2013             | 1,513  | (1,246 to 2,050)   | 252.7                              | (208.8 to 345.3) |
|                |         |                    | Both   | 1990             | 5,512  | (4,026 to 6,448)   | 839.1                              | (612.5 to 980.7) |
|                |         |                    |        | 2013             | 3,214  | (2,780 to 3,938)   | 290.7                              | (252.4 to 354.0) |
|                | YLDs    | Ischemic Stroke    | Male   | 1990             | 271    | (178 to 374)       | 88.6                               | (58.2 to 122.4)  |
|                |         |                    |        | 2013             | 473    | (286 to 682)       | 87.6                               | (53.4 to 126.1)  |
|                |         |                    | Female | 1990             | 204    | (134 to 287)       | 58.1                               | (38.1 to 80.3)   |
|                |         |                    |        | 2013             | 384    | (246 to 560)       | 60.3                               | (38.9 to 87.9)   |
|                |         |                    | Both   | 1990             | 476    | (324 to 649)       | 72.3                               | (49.4 to 98.4)   |
|                |         |                    |        | 2013             | 857    | (577 to 1,188)     | 73.1                               | (49.1 to 101.8)  |
|                |         | Hemorrhagic Stroke | Male   | 1990             | 60     | (34 to 93)         | 19.5                               | (11.0 to 30.1)   |
|                |         |                    |        | 2013             | 101    | (54 to 191)        | 19.1                               | (10.3 to 35.6)   |
|                |         |                    | Female | 1990             | 44     | (22 to 70)         | 12.6                               | (6.4 to 20.2)    |
|                |         |                    |        | 2013             | 77     | (40 to 133)        | 12.7                               | (6.9 to 21.3)    |
|                |         |                    | Both   | 1990             | 104    | (62 to 154)        | 15.8                               | (9.5 to 23.6)    |
|                |         |                    | Both   | 2013             | 179    | (105 to 278)       | 15.7                               | (9.3 to 24.3)    |
| Czech Republic | Deaths  | Ischemic Stroke    | Male   | 1990             | 9,026  | (7,937 to 10,577)  | 214.5                              | (188.8 to 247.7) |
|                |         |                    |        | 2013             | 6,097  | (5,158 to 7,256)   | 93.2                               | (78.9 to 111.1)  |
|                |         |                    |        | Counts, All ages |        |                    | Rate per 100,000, Age-standardized |                  |
| Country        | measure | Stroke Type        | sex    | year             | Mean   | 95% UI             | Mean                               | 95% UI           |
|                |         |                    | Female | 1990             | 13,046 | (10,451 to 14,340) | 161.6                              | (129.1 to 177.5) |
|                |         |                    |        | 2013             | 8,533  | (7,179 to 11,950)  | 71.8                               | (60.5 to 99.9)   |
|                |         |                    | Both   | 1990             | 22,073 | (19,579 to 24,075) | 181.6                              | (160.9 to 197.7) |
|                |         |                    |        | 2013             | 14,631 | (12,787 to 18,635) | 80.5                               | (70.5 to 102.4)  |
|                | Deaths  | Hemorrhagic Stroke | Male   | 1990             | 2,036  | (1,514 to 2,622)   | 40.9                               | (30.3 to 52.7)   |
|                |         |                    |        | 2013             | 1,345  | (875 to 1,769)     | 19.1                               | (12.3 to 25.2)   |
|                |         |                    | Female | 1990             | 2,708  | (1,883 to 3,218)   | 35.3                               | (24.6 to 42.0)   |

|  |       |                    |        |      |         |                      |        |                    |
|--|-------|--------------------|--------|------|---------|----------------------|--------|--------------------|
|  |       |                    |        | 2013 | 1,505   | (1,151 to 2,143)     | 14.2   | (11.0 to 20.1)     |
|  |       |                    | Both   | 1990 | 4,745   | (3,770 to 5,495)     | 38     | (30.4 to 44.0)     |
|  |       |                    |        | 2013 | 2,850   | (2,243 to 3,613)     | 16.4   | (13.0 to 20.6)     |
|  | DALYs | Ischemic Stroke    | Male   | 1990 | 130,413 | (113,373 to 157,291) | 2840.6 | (2495.5 to 3365.1) |
|  |       |                    |        | 2013 | 75,583  | (63,912 to 89,663)   | 1101.8 | (934.5 to 1303.7)  |
|  |       |                    | Female | 1990 | 146,744 | (116,064 to 161,535) | 1862.6 | (1452.5 to 2052.8) |
|  |       |                    |        | 2013 | 77,797  | (65,705 to 106,964)  | 708.8  | (598.0 to 973.5)   |
|  |       |                    | Both   | 1990 | 277,157 | (247,252 to 305,296) | 2253.6 | (2008.0 to 2481.4) |
|  |       |                    |        | 2013 | 153,381 | (134,851 to 190,095) | 876.9  | (771.4 to 1080.6)  |
|  |       | Hemorrhagic Stroke | Male   | 1990 | 46,472  | (35,048 to 60,385)   | 873.4  | (664.6 to 1132.3)  |
|  |       |                    |        | 2013 | 26,104  | (17,754 to 33,060)   | 360.7  | (244.0 to 456.1)   |
|  |       |                    | Female | 1990 | 48,507  | (34,092 to 54,926)   | 677.5  | (476.6 to 766.4)   |
|  |       |                    |        | 2013 | 21,733  | (17,561 to 30,056)   | 237.7  | (194.6 to 323.0)   |
|  |       |                    | Both   | 1990 | 94,980  | (76,608 to 108,996)  | 768.9  | (622.6 to 880.6)   |
|  |       |                    |        | 2013 | 47,837  | (38,852 to 58,442)   | 295.1  | (238.7 to 358.0)   |
|  | YLDs  | Ischemic Stroke    | Male   | 1990 | 1,207   | (768 to 1,743)       | 23.3   | (14.9 to 33.9)     |
|  |       |                    |        | 2013 | 1,803   | (1,187 to 2,534)     | 25.2   | (16.7 to 35.5)     |
|  |       |                    | Female | 1990 | 1,070   | (670 to 1,548)       | 15.5   | (9.8 to 22.4)      |
|  |       |                    |        | 2013 | 1,266   | (846 to 1,786)       | 14.6   | (9.6 to 20.6)      |
|  |       |                    | Both   | 1990 | 2,278   | (1,528 to 3,202)     | 18.9   | (12.6 to 26.5)     |
|  |       |                    |        | 2013 | 3,069   | (2,085 to 4,236)     | 19.5   | (13.3 to 26.9)     |
|  |       | Hemorrhagic Stroke | Male   | 1990 | 246     | (147 to 380)         | 4.7    | (2.8 to 7.2)       |

|                                  |         |                    |        | 2013   | 399                | (242 to 603)        | 5.8                                | (3.5 to 8.7)      |
|----------------------------------|---------|--------------------|--------|--------|--------------------|---------------------|------------------------------------|-------------------|
|                                  |         |                    | Female | 1990   | 229                | (131 to 361)        | 3.6                                | (2.1 to 5.6)      |
|                                  |         |                    |        | 2013   | 305                | (183 to 468)        | 3.9                                | (2.4 to 6.0)      |
|                                  |         |                    | Both   | 1990   | 476                | (304 to 697)        | 4.1                                | (2.6 to 6.0)      |
|                                  |         |                    | Both   | 2013   | 704                | (461 to 1,012)      | 4.8                                | (3.1 to 6.9)      |
|                                  |         |                    |        |        | Counts, All ages   |                     | Rate per 100,000, Age-standardized |                   |
| Country                          | measure | Stroke Type        | sex    | year   | Mean               | 95% UI              | Mean                               | 95% UI            |
| Democratic Republic of the Congo | Deaths  | Ischemic Stroke    | Male   | 1990   | 3,016              | (1,394 to 4,547)    | 74.7                               | (32.2 to 110.7)   |
|                                  |         |                    |        | 2013   | 6,855              | (2,162 to 10,125)   | 86.7                               | (27.8 to 124.6)   |
|                                  |         |                    |        | Female | 1990               | 5,422               | (3,432 to 7,358)                   | 105.2             |
|                                  |         |                    | 2013   | 8,643  | (3,936 to 12,557)  | 93.8                | (42.0 to 135.2)                    |                   |
|                                  |         |                    | Both   | 1990   | 8,438              | (5,394 to 10,919)   | 93.5                               | (60.4 to 122.6)   |
|                                  |         |                    | 2013   | 15,499 | (7,495 to 21,141)  | 91.4                | (44.4 to 125.4)                    |                   |
|                                  | Deaths  | Hemorrhagic Stroke | Male   | 1990   | 4,687              | (3,139 to 6,230)    | 78.9                               | (44.9 to 114.4)   |
|                                  |         |                    |        | 2013   | 11,054             | (7,937 to 15,282)   | 99.9                               | (69.8 to 147.5)   |
|                                  |         |                    |        | Female | 1990               | 7,683               | (5,148 to 10,761)                  | 111.7             |
|                                  |         |                    | 2013   | 12,733 | (8,284 to 19,259)  | 106                 | (67.7 to 166.4)                    |                   |
|                                  |         |                    | Both   | 1990   | 12,371             | (9,018 to 15,702)   | 98.4                               | (66.4 to 132.3)   |
|                                  |         |                    | 2013   | 23,788 | (17,939 to 31,599) | 103.9               | (75.4 to 145.0)                    |                   |
|                                  | DALYs   | Ischemic Stroke    | Male   | 1990   | 69,694             | (35,579 to 103,009) | 1164.3                             | (529.8 to 1765.8) |
|                                  |         |                    |        | 2013   | 147,726            | (47,763 to 229,899) | 1357.8                             | (430.3 to 1995.4) |
| Female                           |         |                    |        | 1990   | 101,869            | (63,109 to 145,536) | 1503.1                             | (951.2 to 2048.7) |



|         |        |                    |        |      |        |                    |       |                  |
|---------|--------|--------------------|--------|------|--------|--------------------|-------|------------------|
|         |        |                    |        | 2013 | 460    | (293 to 664)       | 2.5   | (1.6 to 3.7)     |
|         |        |                    | Both   | 1990 | 575    | (364 to 830)       | 3.1   | (2.0 to 4.4)     |
|         |        |                    | Both   | 2013 | 1,108  | (755 to 1,570)     | 3.1   | (2.1 to 4.4)     |
| Denmark | Deaths | Ischemic Stroke    | Male   | 1990 | 1,495  | (1,176 to 2,002)   | 48.4  | (38.1 to 65.0)   |
|         |        |                    |        | 2013 | 1,251  | (757 to 1,561)     | 30.7  | (18.7 to 38.3)   |
|         |        |                    | Female | 1990 | 2,224  | (1,707 to 2,725)   | 41.7  | (32.1 to 51.6)   |
|         |        |                    |        | 2013 | 1,594  | (1,214 to 2,076)   | 25.9  | (19.6 to 33.4)   |
|         |        |                    | Both   | 1990 | 3,720  | (3,204 to 4,511)   | 44.8  | (38.7 to 54.5)   |
|         |        |                    |        | 2013 | 2,845  | (2,190 to 3,370)   | 28.2  | (21.6 to 33.2)   |
|         | Deaths | Hemorrhagic Stroke | Male   | 1990 | 1,099  | (825 to 1,469)     | 35.6  | (26.6 to 47.7)   |
|         |        |                    |        | 2013 | 1,035  | (715 to 1,303)     | 25.2  | (17.6 to 31.7)   |
|         |        |                    | Female | 1990 | 1,565  | (1,080 to 1,872)   | 33.4  | (23.8 to 39.6)   |
|         |        |                    |        | 2013 | 1,164  | (874 to 1,652)     | 20.6  | (15.6 to 28.8)   |
|         |        |                    | Both   | 1990 | 2,665  | (2,094 to 3,178)   | 34.5  | (27.6 to 41.0)   |
|         |        |                    |        | 2013 | 2,199  | (1,786 to 2,722)   | 22.7  | (18.5 to 27.8)   |
|         | DALYs  | Ischemic Stroke    | Male   | 1990 | 22,768 | (18,684 to 30,312) | 726.7 | (595.9 to 965.2) |
|         |        |                    |        | 2013 | 19,088 | (12,793 to 23,300) | 458.8 | (307.6 to 559.5) |
|         |        |                    | Female | 1990 | 24,784 | (20,114 to 30,311) | 524.7 | (431.2 to 651.3) |
|         |        |                    |        | 2013 | 17,026 | (13,814 to 20,945) | 313   | (257.5 to 382.7) |
|         |        |                    | Both   | 1990 | 47,552 | (41,883 to 57,546) | 613.6 | (540.3 to 744.6) |
|         |        |                    |        | 2013 | 36,114 | (28,750 to 41,824) | 380.9 | (302.2 to 441.0) |
|         |        | Hemorrhagic Stroke | Male   | 1990 | 19,363 | (15,251 to 26,116) | 631.4 | (499.2 to 851.7) |
|         |        |                    |        | 2013 | 16,233 | (11,096 to 20,066) | 398   | (275.2 to 488.5) |
|         |        |                    | Female | 1990 | 22,045 | (16,494 to 26,261) | 564.1 | (435.7 to 683.8) |
|         |        |                    |        | 2013 | 14,409 | (11,261 to 19,198) | 300.9 | (233.0 to 394.5) |
|         |        |                    | Both   | 1990 | 41,408 | (34,734 to 48,490) | 593.6 | (501.1 to 695.3) |
|         |        |                    |        | 2013 | 30,643 | (24,923 to 35,730) | 346.3 | (278.8 to 400.1) |

|          |         |                    |        |      |                  |                   |                                    |                   |
|----------|---------|--------------------|--------|------|------------------|-------------------|------------------------------------|-------------------|
|          | YLDs    | Ischemic Stroke    | Male   | 1990 | 3,542            | (2,414 to 4,759)  | 113.7                              | (77.5 to 152.6)   |
|          |         |                    |        | 2013 | 4,724            | (3,072 to 6,824)  | 113.5                              | (73.9 to 163.3)   |
|          |         |                    | Female | 1990 | 3,230            | (2,183 to 4,519)  | 78.1                               | (52.7 to 109.6)   |
|          |         |                    |        | 2013 | 3,708            | (2,384 to 5,290)  | 76.4                               | (49.8 to 107.7)   |
|          |         |                    | Both   | 1990 | 6,773            | (4,724 to 9,158)  | 93.5                               | (64.8 to 126.0)   |
|          |         |                    |        | 2013 | 8,432            | (5,786 to 11,341) | 94                                 | (64.3 to 126.3)   |
|          |         | Hemorrhagic Stroke | Male   | 1990 | 212              | (130 to 308)      | 7                                  | (4.3 to 10.1)     |
|          |         |                    |        | 2013 | 349              | (209 to 522)      | 8.8                                | (5.3 to 13.1)     |
|          |         |                    | Female | 1990 | 204              | (129 to 298)      | 5.5                                | (3.5 to 7.9)      |
|          |         |                    |        |      | Counts, All ages |                   | Rate per 100,000, Age-standardized |                   |
| Country  | measure | Stroke Type        | sex    | year | Mean             | 95% UI            | Mean                               | 95% UI            |
|          |         |                    |        | 2013 | 305              | (187 to 452)      | 6.9                                | (4.3 to 10.1)     |
|          |         |                    | Both   | 1990 | 417              | (275 to 581)      | 6.1                                | (4.0 to 8.5)      |
|          |         |                    | Both   | 2013 | 655              | (410 to 934)      | 7.8                                | (4.9 to 11.0)     |
| Djibouti | Deaths  | Ischemic Stroke    | Male   | 1990 | 66               | (31 to 110)       | 105.8                              | (52.7 to 167.3)   |
|          |         |                    |        | 2013 | 122              | (68 to 199)       | 85.3                               | (48.4 to 136.0)   |
|          |         |                    | Female | 1990 | 101              | (56 to 158)       | 136.8                              | (80.1 to 202.7)   |
|          |         |                    |        | 2013 | 181              | (110 to 296)      | 111                                | (70.4 to 177.7)   |
|          |         |                    | Both   | 1990 | 168              | (106 to 258)      | 123.4                              | (82.1 to 179.8)   |
|          |         |                    |        | 2013 | 303              | (204 to 476)      | 99.5                               | (68.6 to 150.3)   |
|          | Deaths  | Hemorrhagic Stroke | Male   | 1990 | 81               | (45 to 128)       | 92                                 | (48.5 to 152.2)   |
|          |         |                    |        | 2013 | 129              | (82 to 204)       | 71.5                               | (44.8 to 112.0)   |
|          |         |                    | Female | 1990 | 118              | (55 to 190)       | 119.5                              | (57.7 to 190.0)   |
|          |         |                    |        | 2013 | 177              | (102 to 296)      | 90.3                               | (51.0 to 144.5)   |
|          |         |                    | Both   | 1990 | 199              | (116 to 301)      | 107.1                              | (62.2 to 160.6)   |
|          |         |                    |        | 2013 | 307              | (204 to 475)      | 81.7                               | (54.9 to 121.7)   |
|          | DALYs   | Ischemic Stroke    | Male   | 1990 | 1,353            | (620 to 2,355)    | 1569                               | (751.0 to 2613.6) |

|          |         |                    |        |      |                  |                   |                                    |                    |
|----------|---------|--------------------|--------|------|------------------|-------------------|------------------------------------|--------------------|
|          |         |                    |        | 2013 | 2,232            | (1,204 to 3,770)  | 1248.1                             | (698.9 to 2043.7)  |
|          |         |                    | Female | 1990 | 1,878            | (990 to 3,113)    | 1972.1                             | (1087.6 to 3072.5) |
|          |         |                    |        | 2013 | 2,977            | (1,744 to 5,200)  | 1546.3                             | (933.3 to 2599.2)  |
|          |         |                    | Both   | 1990 | 3,232            | (1,945 to 5,239)  | 1794.9                             | (1137.5 to 2762.7) |
|          |         |                    |        | 2013 | 5,209            | (3,357 to 8,524)  | 1411.6                             | (942.3 to 2243.3)  |
|          |         | Hemorrhagic Stroke | Male   | 1990 | 2,373            | (1,422 to 3,707)  | 1875.2                             | (1053.7 to 2973.5) |
|          |         |                    |        | 2013 | 3,293            | (2,110 to 5,236)  | 1403.1                             | (889.7 to 2203.3)  |
|          |         |                    | Female | 1990 | 3,151            | (1,449 to 5,140)  | 2419                               | (1143.3 to 3881.5) |
|          |         |                    |        | 2013 | 4,074            | (2,288 to 6,900)  | 1706.4                             | (972.3 to 2864.2)  |
|          |         |                    | Both   | 1990 | 5,524            | (3,217 to 8,348)  | 2167                               | (1255.6 to 3285.2) |
|          |         |                    |        | 2013 | 7,368            | (4,807 to 11,579) | 1564.5                             | (1033.6 to 2442.8) |
|          | YLDs    | Ischemic Stroke    | Male   | 1990 | 13               | (8 to 19)         | 10.3                               | (6.6 to 15.1)      |
|          |         |                    |        | 2013 | 25               | (15 to 41)        | 10.4                               | (6.4 to 16.2)      |
|          |         |                    | Female | 1990 | 9                | (5 to 14)         | 6.9                                | (4.3 to 10.1)      |
|          |         |                    |        | 2013 | 20               | (12 to 30)        | 7.8                                | (5.0 to 11.4)      |
|          |         |                    | Both   | 1990 | 22               | (14 to 31)        | 8.5                                | (5.6 to 11.8)      |
|          |         |                    |        | 2013 | 46               | (29 to 67)        | 9.1                                | (5.8 to 12.9)      |
|          |         | Hemorrhagic Stroke | Male   | 1990 | 4                | (2 to 6)          | 2.8                                | (1.7 to 4.3)       |
|          |         |                    |        | 2013 | 8                | (5 to 13)         | 2.9                                | (1.8 to 4.5)       |
|          |         |                    | Female | 1990 | 2                | (1 to 4)          | 1.7                                | (1.0 to 2.6)       |
|          |         |                    |        | 2013 | 5                | (3 to 8)          | 1.9                                | (1.2 to 2.7)       |
|          |         |                    | Both   | 1990 | 7                | (4 to 10)         | 2.2                                | (1.4 to 3.2)       |
|          |         |                    | Both   | 2013 | 14               | (9 to 20)         | 2.4                                | (1.5 to 3.5)       |
| Dominica | Deaths  | Ischemic Stroke    | Male   | 1990 | 16               | (12 to 19)        | 79.9                               | (64.3 to 98.5)     |
|          |         |                    |        |      | Counts, All ages |                   | Rate per 100,000, Age-standardized |                    |
| Country  | measure | Stroke Type        | sex    | year | Mean             | 95% UI            | Mean                               | 95% UI             |
|          |         |                    |        | 2013 | 18               | (13 to 24)        | 65.7                               | (46.8 to 88.1)     |



|  |        |                    |        |      |     |              |        |                    |
|--|--------|--------------------|--------|------|-----|--------------|--------|--------------------|
|  |        |                    | Female | 1990 | 20  | (17 to 26)   | 90.5   | (74.2 to 113.7)    |
|  |        |                    |        | 2013 | 20  | (13 to 27)   | 57.1   | (38.7 to 76.6)     |
|  |        |                    | Both   | 1990 | 36  | (32 to 43)   | 85.8   | (74.7 to 101.2)    |
|  |        |                    |        | 2013 | 38  | (29 to 47)   | 61.6   | (47.4 to 76.2)     |
|  | Deaths | Hemorrhagic Stroke | Male   | 1990 | 9   | (7 to 12)    | 44.7   | (34.5 to 57.1)     |
|  |        |                    |        | 2013 | 11  | (7 to 16)    | 39.7   | (26.2 to 56.0)     |
|  |        |                    | Female | 1990 | 14  | (11 to 17)   | 60.3   | (48.3 to 76.1)     |
|  |        |                    |        | 2013 | 11  | (8 to 15)    | 33.4   | (23.5 to 45.1)     |
|  |        |                    | Both   | 1990 | 23  | (20 to 27)   | 53.2   | (44.8 to 63.0)     |
|  |        |                    |        | 2013 | 23  | (18 to 29)   | 36.6   | (28.5 to 47.0)     |
|  | DALYs  | Ischemic Stroke    | Male   | 1990 | 285 | (229 to 348) | 1307.2 | (1051.8 to 1592.7) |
|  |        |                    |        | 2013 | 315 | (224 to 434) | 1063.3 | (753.9 to 1455.5)  |
|  |        |                    | Female | 1990 | 324 | (264 to 400) | 1354.2 | (1099.1 to 1679.0) |
|  |        |                    |        | 2013 | 246 | (171 to 338) | 715.3  | (498.6 to 982.0)   |
|  |        |                    | Both   | 1990 | 610 | (530 to 713) | 1335.4 | (1159.6 to 1565.3) |
|  |        |                    |        | 2013 | 562 | (445 to 706) | 883.1  | (699.5 to 1111.8)  |
|  |        | Hemorrhagic Stroke | Male   | 1990 | 225 | (178 to 280) | 930    | (735.6 to 1157.6)  |
|  |        |                    |        | 2013 | 257 | (169 to 362) | 819.4  | (541.3 to 1151.1)  |
|  |        |                    | Female | 1990 | 285 | (228 to 348) | 1128.1 | (906.3 to 1378.1)  |
|  |        |                    |        | 2013 | 192 | (135 to 261) | 554.8  | (389.7 to 756.5)   |
|  |        |                    | Both   | 1990 | 510 | (437 to 594) | 1035.7 | (880.7 to 1206.1)  |
|  |        |                    |        | 2013 | 450 | (338 to 576) | 683.8  | (514.4 to 874.9)   |
|  | YLDs   | Ischemic Stroke    | Male   | 1990 | 9   | (5 to 13)    | 42.2   | (26.1 to 62.5)     |
|  |        |                    |        | 2013 | 12  | (8 to 18)    | 43.3   | (28.8 to 62.6)     |
|  |        |                    | Female | 1990 | 7   | (4 to 10)    | 32.1   | (20.3 to 46.0)     |
|  |        |                    |        | 2013 | 10  | (7 to 14)    | 31.3   | (21.3 to 43.3)     |
|  |        |                    | Both   | 1990 | 16  | (11 to 23)   | 36.9   | (24.3 to 51.5)     |

|                    |         |                    |        |                  |        |                    |                                    |                   |
|--------------------|---------|--------------------|--------|------------------|--------|--------------------|------------------------------------|-------------------|
|                    |         |                    |        | 2013             | 23     | (16 to 32)         | 36.9                               | (25.2 to 50.4)    |
|                    |         | Hemorrhagic Stroke | Male   | 1990             | 3      | (1 to 4)           | 13.5                               | (8.0 to 21.4)     |
|                    |         |                    |        | 2013             | 4      | (2 to 6)           | 13.5                               | (7.8 to 20.1)     |
|                    |         |                    | Female | 1990             | 2      | (1 to 3)           | 10.1                               | (6.2 to 15.1)     |
|                    |         |                    |        | 2013             | 3      | (2 to 5)           | 11.1                               | (7.0 to 16.7)     |
|                    |         |                    | Both   | 1990             | 5      | (3 to 8)           | 11.7                               | (7.6 to 17.2)     |
|                    |         |                    | Both   | 2013             | 8      | (5 to 11)          | 12.3                               | (7.9 to 17.9)     |
| Dominican Republic | Deaths  | Ischemic Stroke    | Male   | 1990             | 946    | (713 to 1,137)     | 69.6                               | (52.8 to 83.8)    |
|                    |         |                    |        | 2013             | 2,421  | (1,794 to 3,467)   | 72.8                               | (53.9 to 104.3)   |
|                    |         |                    | Female | 1990             | 795    | (637 to 943)       | 61.6                               | (49.2 to 73.5)    |
|                    |         |                    |        | 2013             | 2,320  | (1,697 to 3,146)   | 63.2                               | (46.4 to 85.6)    |
|                    |         |                    |        | Counts, All ages |        |                    | Rate per 100,000, Age-standardized |                   |
| Country            | measure | Stroke Type        | sex    | year             | Mean   | 95% UI             | Mean                               | 95% UI            |
|                    |         |                    | Both   | 1990             | 1,741  | (1,429 to 1,958)   | 65.7                               | (54.2 to 73.9)    |
|                    |         |                    |        | 2013             | 4,741  | (3,843 to 6,168)   | 67.9                               | (55.1 to 88.5)    |
|                    | Deaths  | Hemorrhagic Stroke | Male   | 1990             | 556    | (447 to 719)       | 34.2                               | (27.1 to 45.6)    |
|                    |         |                    |        | 2013             | 1,622  | (1,093 to 2,299)   | 45.6                               | (30.6 to 64.8)    |
|                    |         |                    | Female | 1990             | 533    | (453 to 745)       | 33.8                               | (28.4 to 48.2)    |
|                    |         |                    |        | 2013             | 1,514  | (990 to 2,095)     | 39.8                               | (25.9 to 55.3)    |
|                    |         |                    | Both   | 1990             | 1,090  | (944 to 1,372)     | 34.1                               | (29.0 to 43.4)    |
|                    |         |                    |        | 2013             | 3,136  | (2,289 to 4,084)   | 42.7                               | (31.0 to 56.0)    |
|                    | DALYs   | Ischemic Stroke    | Male   | 1990             | 18,828 | (13,909 to 22,594) | 1101.6                             | (828.8 to 1318.4) |
|                    |         |                    |        | 2013             | 39,310 | (28,562 to 57,548) | 1117.1                             | (818.2 to 1620.4) |
|                    |         |                    | Female | 1990             | 14,342 | (11,266 to 16,661) | 890.9                              | (714.5 to 1032.0) |
|                    |         |                    |        | 2013             | 31,688 | (23,832 to 45,146) | 849.4                              | (641.5 to 1206.6) |
|                    |         |                    | Both   | 1990             | 33,171 | (26,563 to 37,509) | 999.6                              | (821.1 to 1123.3) |

|         |        |                    |        |      |        |                    |       |                   |
|---------|--------|--------------------|--------|------|--------|--------------------|-------|-------------------|
|         |        |                    |        | 2013 | 70,998 | (56,651 to 96,213) | 980.5 | (781.5 to 1314.9) |
|         |        | Hemorrhagic Stroke | Male   | 1990 | 15,244 | (12,417 to 19,300) | 714.4 | (581.5 to 911.0)  |
|         |        |                    |        | 2013 | 36,581 | (25,170 to 51,309) | 932.6 | (633.6 to 1317.5) |
|         |        |                    | Female | 1990 | 14,530 | (12,593 to 19,713) | 698   | (599.4 to 950.9)  |
|         |        |                    |        | 2013 | 29,939 | (20,994 to 41,521) | 736.1 | (504.2 to 1025.4) |
|         |        |                    | Both   | 1990 | 29,775 | (26,056 to 36,675) | 706.8 | (615.3 to 876.8)  |
|         |        |                    |        | 2013 | 66,521 | (49,933 to 85,159) | 833   | (619.6 to 1076.6) |
|         | YLDs   | Ischemic Stroke    | Male   | 1990 | 806    | (530 to 1,120)     | 48.9  | (32.0 to 67.3)    |
|         |        |                    |        | 2013 | 1,633  | (1,075 to 2,340)   | 46.2  | (30.6 to 66.8)    |
|         |        |                    | Female | 1990 | 533    | (362 to 750)       | 34.3  | (23.3 to 48.1)    |
|         |        |                    |        | 2013 | 1,288  | (834 to 1,846)     | 34.3  | (22.1 to 49.0)    |
|         |        |                    | Both   | 1990 | 1,340  | (922 to 1,832)     | 41.7  | (28.4 to 56.5)    |
|         |        |                    |        | 2013 | 2,922  | (1,968 to 4,069)   | 40.1  | (27.1 to 55.8)    |
|         |        | Hemorrhagic Stroke | Male   | 1990 | 310    | (180 to 512)       | 16.3  | (9.3 to 27.5)     |
|         |        |                    |        | 2013 | 558    | (327 to 894)       | 14.7  | (8.4 to 23.9)     |
|         |        |                    | Female | 1990 | 186    | (117 to 272)       | 10.3  | (6.5 to 15.0)     |
|         |        |                    |        | 2013 | 469    | (294 to 692)       | 11.8  | (7.4 to 17.4)     |
|         |        |                    | Both   | 1990 | 496    | (321 to 773)       | 13.4  | (8.5 to 20.9)     |
|         |        |                    | Both   | 2013 | 1,028  | (663 to 1,482)     | 13.2  | (8.5 to 19.2)     |
| Ecuador | Deaths | Ischemic Stroke    | Male   | 1990 | 941    | (703 to 1,121)     | 46.7  | (35.6 to 55.8)    |
|         |        |                    |        | 2013 | 1,731  | (1,305 to 2,293)   | 35.1  | (26.5 to 46.1)    |
|         |        |                    | Female | 1990 | 892    | (618 to 994)       | 38.5  | (27.2 to 43.4)    |
|         |        |                    |        | 2013 | 1,601  | (1,256 to 2,367)   | 27.6  | (21.6 to 40.7)    |
|         |        |                    | Both   | 1990 | 1,833  | (1,435 to 2,060)   | 42.4  | (33.4 to 47.7)    |
|         |        |                    |        | 2013 | 3,333  | (2,708 to 4,482)   | 31.2  | (25.4 to 41.6)    |
|         | Deaths | Hemorrhagic Stroke | Male   | 1990 | 572    | (466 to 747)       | 23.3  | (18.6 to 31.3)    |

| Country | measure | Stroke Type        | sex    | year | Counts, All ages |                    | Rate per 100,000, Age-standardized |                  |
|---------|---------|--------------------|--------|------|------------------|--------------------|------------------------------------|------------------|
|         |         |                    |        |      | Mean             | 95% UI             | Mean                               | 95% UI           |
|         |         |                    |        | 2013 | 1,414            | (951 to 1,862)     | 25.7                               | (17.1 to 33.9)   |
|         |         |                    | Female | 1990 | 603              | (512 to 815)       | 22.5                               | (18.7 to 30.7)   |
|         |         |                    |        | 2013 | 1,268            | (854 to 1,681)     | 20.7                               | (14.0 to 27.4)   |
|         |         |                    | Both   | 1990 | 1,175            | (1,041 to 1,479)   | 22.9                               | (20.1 to 29.5)   |
|         |         |                    |        | 2013 | 2,682            | (1,997 to 3,261)   | 23.1                               | (17.1 to 28.1)   |
|         | DALYs   | Ischemic Stroke    | Male   | 1990 | 18,651           | (13,398 to 22,257) | 746.1                              | (550.1 to 888.3) |
|         |         |                    |        | 2013 | 28,119           | (20,850 to 39,099) | 516.5                              | (385.6 to 696.6) |
|         |         |                    | Female | 1990 | 15,215           | (9,998 to 17,088)  | 560.7                              | (374.6 to 627.4) |
|         |         |                    |        | 2013 | 20,646           | (15,506 to 33,237) | 342.8                              | (258.1 to 550.7) |
|         |         |                    | Both   | 1990 | 33,867           | (25,571 to 38,420) | 649                                | (498.2 to 733.7) |
|         |         |                    |        | 2013 | 48,766           | (38,146 to 69,375) | 425.8                              | (335.7 to 595.9) |
|         |         | Hemorrhagic Stroke | Male   | 1990 | 17,059           | (14,150 to 21,469) | 534.7                              | (440.8 to 685.8) |
|         |         |                    |        | 2013 | 36,498           | (25,491 to 48,779) | 577.2                              | (398.3 to 768.9) |
|         |         |                    | Female | 1990 | 16,720           | (14,551 to 22,109) | 508.1                              | (439.4 to 674.0) |
|         |         |                    |        | 2013 | 29,355           | (20,644 to 39,750) | 441.1                              | (307.2 to 592.7) |
|         |         |                    | Both   | 1990 | 33,780           | (30,069 to 41,380) | 520.6                              | (463.4 to 645.5) |
|         |         |                    |        | 2013 | 65,853           | (51,009 to 81,078) | 507.2                              | (389.1 to 622.4) |
|         | YLDs    | Ischemic Stroke    | Male   | 1990 | 404              | (262 to 574)       | 15.8                               | (10.3 to 22.4)   |
|         |         |                    |        | 2013 | 929              | (597 to 1,334)     | 16.6                               | (10.8 to 23.8)   |
|         |         |                    | Female | 1990 | 229              | (145 to 328)       | 8.3                                | (5.2 to 11.9)    |
|         |         |                    |        | 2013 | 495              | (325 to 721)       | 8.1                                | (5.3 to 11.7)    |
|         |         |                    | Both   | 1990 | 634              | (417 to 872)       | 11.9                               | (7.8 to 16.4)    |
|         |         |                    |        | 2013 | 1,424            | (962 to 2,001)     | 12.1                               | (8.2 to 17.2)    |
|         |         | Hemorrhagic Stroke | Male   | 1990 | 170              | (107 to 260)       | 5.6                                | (3.5 to 8.8)     |
|         |         |                    |        | 2013 | 389              | (244 to 593)       | 6.3                                | (3.9 to 9.6)     |

|         |         |                    |        |                  |         |                      |        |                                    |  |
|---------|---------|--------------------|--------|------------------|---------|----------------------|--------|------------------------------------|--|
|         |         |                    | Female | 1990             | 101     | (64 to 147)          | 3.2    | (2.0 to 4.7)                       |  |
|         |         |                    |        | 2013             | 244     | (154 to 362)         | 3.7    | (2.3 to 5.6)                       |  |
|         |         |                    | Both   | 1990             | 272     | (179 to 389)         | 4.4    | (2.8 to 6.3)                       |  |
|         |         |                    | Both   | 2013             | 633     | (420 to 908)         | 4.9    | (3.3 to 7.2)                       |  |
| Egypt   | Deaths  | Ischemic Stroke    | Male   | 1990             | 13,213  | (10,325 to 16,360)   | 132.9  | (102.7 to 163.9)                   |  |
|         |         |                    |        | 2013             | 19,831  | (16,209 to 24,879)   | 111    | (91.2 to 138.4)                    |  |
|         |         |                    | Female | 1990             | 15,084  | (11,439 to 17,873)   | 104.7  | (79.0 to 124.2)                    |  |
|         |         |                    |        | 2013             | 21,009  | (17,019 to 26,387)   | 84.3   | (68.2 to 105.7)                    |  |
|         |         |                    | Both   | 1990             | 28,297  | (23,647 to 32,048)   | 115.7  | (95.7 to 130.9)                    |  |
|         |         |                    |        | 2013             | 40,840  | (35,648 to 48,869)   | 95.1   | (83.4 to 113.2)                    |  |
|         | Deaths  | Hemorrhagic Stroke | Male   | 1990             | 17,419  | (13,188 to 20,785)   | 121    | (85.2 to 148.0)                    |  |
|         |         |                    |        | 2013             | 23,019  | (18,819 to 27,921)   | 103.3  | (83.6 to 125.4)                    |  |
|         |         |                    | Female | 1990             | 17,526  | (13,447 to 20,609)   | 105.8  | (79.7 to 126.2)                    |  |
|         |         |                    |        | 2013             | 22,085  | (18,004 to 27,661)   | 84     | (68.5 to 106.3)                    |  |
|         |         |                    | Both   | 1990             | 34,946  | (28,480 to 40,169)   | 113.2  | (89.4 to 131.3)                    |  |
|         |         |                    |        | Counts, All ages |         |                      |        | Rate per 100,000, Age-standardized |  |
| Country | measure | Stroke Type        | sex    | year             | Mean    | 95% UI               | Mean   | 95% UI                             |  |
|         |         |                    |        | 2013             | 45,104  | (39,361 to 52,519)   | 93.3   | (80.9 to 109.8)                    |  |
|         | DALYs   | Ischemic Stroke    | Male   | 1990             | 271,604 | (206,609 to 346,190) | 1992.4 | (1566.1 to 2476.6)                 |  |
|         |         |                    |        | 2013             | 361,085 | (289,175 to 463,692) | 1607.7 | (1307.1 to 2004.3)                 |  |
|         |         |                    | Female | 1990             | 273,037 | (205,531 to 339,201) | 1564.4 | (1179.8 to 1854.4)                 |  |
|         |         |                    |        | 2013             | 325,944 | (263,397 to 414,696) | 1171.1 | (950.0 to 1482.5)                  |  |
|         |         |                    | Both   | 1990             | 544,641 | (449,485 to 635,442) | 1740.6 | (1462.1 to 1983.8)                 |  |
|         |         |                    |        | 2013             | 687,030 | (597,221 to 776,839) | 1359.6 | (1184.9 to 1641.5)                 |  |

|             |        |                    |        |      |           |                        |        |                    |
|-------------|--------|--------------------|--------|------|-----------|------------------------|--------|--------------------|
|             |        |                    |        |      |           | 834,869)               |        |                    |
|             |        | Hemorrhagic Stroke | Male   | 1990 | 692,056   | (540,038 to 836,254)   | 2923.9 | (2252.3 to 3488.8) |
|             |        |                    |        | 2013 | 659,363   | (543,763 to 790,403)   | 2154.6 | (1766.8 to 2585.0) |
|             |        |                    | Female | 1990 | 519,378   | (378,922 to 667,917)   | 2200.3 | (1697.6 to 2612.1) |
|             |        |                    |        | 2013 | 448,261   | (368,691 to 546,499)   | 1441.6 | (1187.8 to 1766.6) |
|             |        |                    | Both   | 1990 | 1,211,435 | (966,552 to 1,392,435) | 2557.8 | (2088.1 to 2927.1) |
|             |        |                    |        | 2013 | 1,107,624 | (964,914 to 1,265,227) | 1790.1 | (1568.9 to 2063.9) |
|             | YLDs   | Ischemic Stroke    | Male   | 1990 | 1,491     | (949 to 2,113)         | 9.6    | (6.1 to 13.5)      |
|             |        |                    |        | 2013 | 2,678     | (1,779 to 3,844)       | 9.7    | (6.4 to 13.7)      |
|             |        |                    | Female | 1990 | 1,384     | (889 to 2,030)         | 7.7    | (4.9 to 11.2)      |
|             |        |                    |        | 2013 | 2,259     | (1,421 to 3,254)       | 7.3    | (4.6 to 10.6)      |
|             |        |                    | Both   | 1990 | 2,875     | (1,905 to 3,962)       | 8.5    | (5.7 to 11.7)      |
|             |        |                    |        | 2013 | 4,938     | (3,289 to 6,777)       | 8.4    | (5.6 to 11.7)      |
|             |        | Hemorrhagic Stroke | Male   | 1990 | 210       | (125 to 314)           | 1.2    | (0.7 to 1.7)       |
|             |        |                    |        | 2013 | 372       | (217 to 597)           | 1.2    | (0.7 to 1.9)       |
|             |        |                    | Female | 1990 | 261       | (145 to 412)           | 1.4    | (0.8 to 2.1)       |
|             |        |                    |        | 2013 | 413       | (221 to 658)           | 1.3    | (0.7 to 2.0)       |
|             |        |                    | Both   | 1990 | 472       | (301 to 701)           | 1.3    | (0.8 to 1.9)       |
|             |        |                    | Both   | 2013 | 785       | (499 to 1,144)         | 1.3    | (0.8 to 1.8)       |
| El Salvador | Deaths | Ischemic Stroke    | Male   | 1990 | 421       | (248 to 549)           | 37.4   | (22.0 to 49.2)     |
|             |        |                    |        | 2013 | 325       | (222 to 521)           | 16.3   | (11.2 to 26.0)     |
|             |        |                    | Female | 1990 | 474       | (251 to 568)           | 34.1   | (18.2 to 41.1)     |
|             |        |                    |        | 2013 | 391       | (279 to 635)           | 14.2   | (10.1 to 23.0)     |

|         |         |                    |        |      |                  |                    |                                    |                  |
|---------|---------|--------------------|--------|------|------------------|--------------------|------------------------------------|------------------|
|         |         |                    | Both   | 1990 | 895              | (546 to 1,090)     | 35.6                               | (21.6 to 43.6)   |
|         |         |                    |        | 2013 | 717              | (545 to 1,076)     | 15.1                               | (11.5 to 22.6)   |
|         | Deaths  | Hemorrhagic Stroke | Male   | 1990 | 265              | (188 to 436)       | 20.9                               | (14.1 to 36.4)   |
|         |         |                    |        |      | Counts, All ages |                    | Rate per 100,000, Age-standardized |                  |
| Country | measure | Stroke Type        | sex    | year | Mean             | 95% UI             | Mean                               | 95% UI           |
|         |         |                    |        | 2013 | 568              | (395 to 746)       | 28.1                               | (19.5 to 36.9)   |
|         |         |                    | Female | 1990 | 303              | (246 to 495)       | 19.9                               | (15.7 to 33.8)   |
|         |         |                    |        | 2013 | 714              | (500 to 940)       | 26                                 | (18.3 to 34.2)   |
|         |         |                    | Both   | 1990 | 569              | (447 to 878)       | 20.4                               | (15.4 to 32.9)   |
|         |         |                    |        | 2013 | 1,283            | (976 to 1,557)     | 26.9                               | (20.4 to 32.6)   |
|         | DALYs   | Ischemic Stroke    | Male   | 1990 | 8,969            | (5,489 to 11,407)  | 623.4                              | (372.4 to 801.7) |
|         |         |                    |        | 2013 | 5,358            | (3,801 to 8,374)   | 258.7                              | (183.4 to 405.1) |
|         |         |                    | Female | 1990 | 8,796            | (4,711 to 10,435)  | 528.3                              | (280.9 to 627.3) |
|         |         |                    |        | 2013 | 5,370            | (3,909 to 8,714)   | 197.2                              | (143.5 to 319.0) |
|         |         |                    | Both   | 1990 | 17,766           | (11,063 to 21,491) | 571.7                              | (351.8 to 694.4) |
|         |         |                    |        | 2013 | 10,728           | (8,325 to 15,983)  | 223.9                              | (173.5 to 333.2) |
|         |         | Hemorrhagic Stroke | Male   | 1990 | 8,008            | (6,244 to 11,718)  | 476.1                              | (359.8 to 743.9) |
|         |         |                    |        | 2013 | 11,579           | (8,550 to 15,073)  | 538.7                              | (392.6 to 700.0) |
|         |         |                    | Female | 1990 | 8,289            | (7,185 to 11,696)  | 442.8                              | (381.0 to 650.7) |
|         |         |                    |        | 2013 | 12,454           | (9,228 to 17,009)  | 451                                | (334.1 to 613.9) |
|         |         |                    | Both   | 1990 | 16,298           | (13,933 to 22,139) | 458.1                              | (380.6 to 656.5) |
|         |         |                    |        | 2013 | 24,033           | (19,439 to 29,386) | 489.6                              | (395.5 to 598.9) |
|         | YLDs    | Ischemic Stroke    | Male   | 1990 | 84               | (53 to 122)        | 6.9                                | (4.4 to 10.1)    |
|         |         |                    |        | 2013 | 135              | (83 to 200)        | 6.9                                | (4.2 to 10.2)    |
|         |         |                    | Female | 1990 | 83               | (53 to 119)        | 5.7                                | (3.7 to 8.2)     |
|         |         |                    |        | 2013 | 149              | (93 to 237)        | 5.7                                | (3.5 to 9.0)     |
|         |         |                    | Both   | 1990 | 167              | (113 to 234)       | 6.2                                | (4.2 to 8.7)     |

|                   |         |                    |        |                  |       |                  |                                    |                    |
|-------------------|---------|--------------------|--------|------------------|-------|------------------|------------------------------------|--------------------|
|                   |         |                    |        | 2013             | 284   | (187 to 409)     | 6.2                                | (4.1 to 9.0)       |
|                   |         | Hemorrhagic Stroke | Male   | 1990             | 261   | (171 to 359)     | 19.1                               | (12.5 to 26.4)     |
|                   |         |                    |        | 2013             | 409   | (256 to 583)     | 19.9                               | (12.3 to 28.5)     |
|                   |         |                    | Female | 1990             | 206   | (136 to 282)     | 13                                 | (8.7 to 17.8)      |
|                   |         |                    |        | 2013             | 336   | (212 to 486)     | 12.5                               | (7.8 to 18.2)      |
|                   |         |                    | Both   | 1990             | 467   | (313 to 628)     | 15.8                               | (10.5 to 21.1)     |
|                   |         |                    | Both   | 2013             | 746   | (490 to 1,031)   | 15.7                               | (10.4 to 21.8)     |
| Equatorial Guinea | Deaths  | Ischemic Stroke    | Male   | 1990             | 87    | (48 to 128)      | 124                                | (67.0 to 177.3)    |
|                   |         |                    |        | 2013             | 122   | (82 to 188)      | 103.3                              | (72.3 to 148.3)    |
|                   |         |                    | Female | 1990             | 93    | (57 to 134)      | 118.8                              | (74.5 to 168.9)    |
|                   |         |                    |        | 2013             | 108   | (73 to 178)      | 101                                | (68.2 to 161.8)    |
|                   |         |                    | Both   | 1990             | 181   | (114 to 250)     | 122                                | (76.3 to 166.9)    |
|                   |         |                    |        | 2013             | 230   | (165 to 349)     | 103                                | (77.2 to 152.5)    |
|                   | Deaths  | Hemorrhagic Stroke | Male   | 1990             | 116   | (74 to 167)      | 133                                | (85.3 to 190.7)    |
|                   |         |                    |        | 2013             | 142   | (82 to 227)      | 81.8                               | (48.9 to 124.6)    |
|                   |         |                    | Female | 1990             | 121   | (76 to 182)      | 133.2                              | (82.9 to 201.1)    |
|                   |         |                    |        | 2013             | 113   | (63 to 193)      | 78.2                               | (43.8 to 131.6)    |
|                   |         |                    | Both   | 1990             | 237   | (158 to 339)     | 134.3                              | (90.1 to 191.5)    |
|                   |         |                    |        | Counts, All ages |       |                  | Rate per 100,000, Age-standardized |                    |
| Country           | measure | Stroke Type        | sex    | year             | Mean  | 95% UI           | Mean                               | 95% UI             |
|                   |         |                    |        | 2013             | 255   | (163 to 404)     | 80.6                               | (53.7 to 125.4)    |
|                   | DALYs   | Ischemic Stroke    | Male   | 1990             | 1,820 | (1,009 to 2,763) | 2092.9                             | (1152.9 to 3106.0) |
|                   |         |                    |        | 2013             | 2,658 | (1,703 to 4,287) | 1592.5                             | (1085.3 to 2450.4) |
|                   |         |                    | Female | 1990             | 1,610 | (909 to 2,445)   | 1737.6                             | (1034.9 to 2571.8) |
|                   |         |                    |        | 2013             | 1,862 | (1,187 to 3,252) | 1351.4                             | (901.7 to 2256.3)  |
|                   |         |                    | Both   | 1990             | 3,430 | (2,075 to 4,914) | 1918.5                             | (1206.9 to 2715.6) |
|                   |         |                    |        | 2013             | 4,521 | (2,995 to 7,214) | 1485.9                             | (1059.6 to 2276.9) |



|         |        |                    |        |      |       |                   |        |                    |
|---------|--------|--------------------|--------|------|-------|-------------------|--------|--------------------|
|         |        | Hemorrhagic Stroke | Male   | 1990 | 3,400 | (2,242 to 4,836)  | 3111.9 | (1989.1 to 4522.0) |
|         |        |                    |        | 2013 | 4,418 | (2,506 to 7,090)  | 1816.9 | (1063.8 to 2894.5) |
|         |        |                    | Female | 1990 | 2,997 | (1,846 to 4,514)  | 2768.9 | (1696.1 to 4156.7) |
|         |        |                    |        | 2013 | 3,192 | (1,683 to 5,723)  | 1560   | (859.2 to 2703.2)  |
|         |        |                    | Both   | 1990 | 6,398 | (4,319 to 9,004)  | 2959.7 | (1963.4 to 4228.6) |
|         |        |                    |        | 2013 | 7,610 | (4,644 to 12,191) | 1700.5 | (1083.1 to 2724.0) |
|         | YLDs   | Ischemic Stroke    | Male   | 1990 | 14    | (9 to 20)         | 14.2   | (9.3 to 20.5)      |
|         |        |                    |        | 2013 | 31    | (19 to 47)        | 14.7   | (9.2 to 21.7)      |
|         |        |                    | Female | 1990 | 10    | (7 to 15)         | 10.6   | (6.9 to 15.0)      |
|         |        |                    |        | 2013 | 21    | (13 to 30)        | 11.2   | (7.1 to 16.0)      |
|         |        |                    | Both   | 1990 | 25    | (17 to 34)        | 12.4   | (8.5 to 17.0)      |
|         |        |                    |        | 2013 | 52    | (34 to 75)        | 13     | (8.5 to 18.5)      |
|         |        | Hemorrhagic Stroke | Male   | 1990 | 4     | (2 to 6)          | 3.8    | (2.4 to 5.8)       |
|         |        |                    |        | 2013 | 9     | (5 to 14)         | 3.8    | (2.4 to 5.8)       |
|         |        |                    | Female | 1990 | 2     | (1 to 4)          | 2.6    | (1.7 to 3.8)       |
|         |        |                    |        | 2013 | 5     | (3 to 8)          | 2.6    | (1.6 to 3.9)       |
|         |        |                    | Both   | 1990 | 7     | (4 to 10)         | 3.2    | (2.1 to 4.5)       |
|         |        |                    | Both   | 2013 | 15    | (9 to 21)         | 3.2    | (2.1 to 4.7)       |
| Eritrea | Deaths | Ischemic Stroke    | Male   | 1990 | 153   | (55 to 269)       | 72.5   | (27.0 to 121.3)    |
|         |        |                    |        | 2013 | 375   | (169 to 631)      | 73.3   | (34.3 to 116.9)    |
|         |        |                    | Female | 1990 | 284   | (86 to 433)       | 94.5   | (29.1 to 143.1)    |
|         |        |                    |        | 2013 | 736   | (338 to 1,268)    | 98.8   | (46.6 to 163.2)    |
|         |        |                    | Both   | 1990 | 438   | (197 to 644)      | 88     | (37.2 to 128.3)    |
|         |        |                    |        | 2013 | 1,111 | (625 to 1,694)    | 90.5   | (50.9 to 134.8)    |
|         | Deaths | Hemorrhagic Stroke | Male   | 1990 | 277   | (144 to 395)      | 79.7   | (32.1 to 123.5)    |
|         |        |                    |        | 2013 | 556   | (330 to 833)      | 73.2   | (38.7 to 117.0)    |

|         |         |                    |        |      |                  |                    |                                    |                    |
|---------|---------|--------------------|--------|------|------------------|--------------------|------------------------------------|--------------------|
|         |         |                    | Female | 1990 | 447              | (170 to 662)       | 102.1                              | (39.2 to 157.8)    |
|         |         |                    |        | 2013 | 855              | (445 to 1,315)     | 88.5                               | (43.9 to 140.0)    |
|         |         |                    | Both   | 1990 | 724              | (424 to 954)       | 94.3                               | (52.2 to 131.6)    |
|         |         |                    |        | 2013 | 1,411            | (940 to 1,903)     | 83.1                               | (51.7 to 117.2)    |
|         | DALYs   | Ischemic Stroke    | Male   | 1990 | 3,775            | (1,365 to 6,816)   | 1162.2                             | (432.0 to 1998.4)  |
|         |         |                    |        | 2013 | 8,200            | (3,630 to 14,026)  | 1124.8                             | (516.8 to 1855.4)  |
|         |         |                    | Female | 1990 | 5,716            | (1,733 to 9,063)   | 1402.6                             | (431.9 to 2118.3)  |
|         |         |                    |        |      | Counts, All ages |                    | Rate per 100,000, Age-standardized |                    |
| Country | measure | Stroke Type        | sex    | year | Mean             | 95% UI             | Mean                               | 95% UI             |
|         |         |                    |        | 2013 | 13,076           | (5,848 to 23,793)  | 1406                               | (650.2 to 2433.4)  |
|         |         |                    | Both   | 1990 | 9,491            | (4,431 to 13,957)  | 1328.6                             | (587.3 to 1919.1)  |
|         |         |                    |        | 2013 | 21,277           | (11,989 to 33,022) | 1310.9                             | (739.9 to 1991.6)  |
|         |         | Hemorrhagic Stroke | Male   | 1990 | 8,778            | (5,085 to 12,456)  | 1661.1                             | (790.7 to 2436.6)  |
|         |         |                    |        | 2013 | 15,989           | (9,855 to 23,097)  | 1469.9                             | (841.4 to 2255.1)  |
|         |         |                    | Female | 1990 | 12,418           | (4,538 to 18,367)  | 2045.1                             | (784.1 to 3041.6)  |
|         |         |                    |        | 2013 | 20,729           | (10,840 to 32,706) | 1675.3                             | (875.6 to 2566.8)  |
|         |         |                    | Both   | 1990 | 21,197           | (12,471 to 28,008) | 1895.1                             | (1097.0 to 2529.1) |
|         |         |                    |        | 2013 | 36,718           | (25,460 to 49,497) | 1599.4                             | (1059.6 to 2158.8) |
|         | YLDs    | Ischemic Stroke    | Male   | 1990 | 60               | (37 to 90)         | 10.2                               | (6.7 to 14.5)      |
|         |         |                    |        | 2013 | 131              | (83 to 185)        | 10.9                               | (7.0 to 15.3)      |
|         |         |                    | Female | 1990 | 45               | (27 to 66)         | 6.6                                | (4.1 to 9.8)       |
|         |         |                    |        | 2013 | 102              | (65 to 148)        | 6.9                                | (4.5 to 9.9)       |
|         |         |                    | Both   | 1990 | 105              | (68 to 146)        | 8.1                                | (5.4 to 11.1)      |
|         |         |                    |        | 2013 | 233              | (156 to 324)       | 8.6                                | (5.8 to 11.7)      |
|         |         | Hemorrhagic Stroke | Male   | 1990 | 23               | (14 to 35)         | 2.9                                | (1.8 to 4.2)       |
|         |         |                    |        | 2013 | 48               | (30 to 71)         | 3                                  | (1.9 to 4.4)       |
|         |         |                    | Female | 1990 | 14               | (8 to 21)          | 1.7                                | (1.1 to 2.4)       |



|          |        |                    |        |      |        |                    |       |                  |
|----------|--------|--------------------|--------|------|--------|--------------------|-------|------------------|
|          |        |                    |        | 2013 | 2,920  | (2,200 to 4,600)   | 233   | (179.1 to 358.4) |
|          |        |                    | Both   | 1990 | 14,144 | (9,786 to 17,380)  | 777.6 | (540.4 to 953.1) |
|          |        |                    |        | 2013 | 7,660  | (6,130 to 9,829)   | 392.1 | (314.9 to 492.6) |
|          | YLDs   | Ischemic Stroke    | Male   | 1990 | 331    | (212 to 471)       | 46.2  | (29.7 to 65.8)   |
|          |        |                    |        | 2013 | 354    | (218 to 517)       | 46.2  | (28.8 to 67.2)   |
|          |        |                    | Female | 1990 | 350    | (233 to 493)       | 31.6  | (20.9 to 44.8)   |
|          |        |                    |        | 2013 | 362    | (235 to 502)       | 29.8  | (19.7 to 41.4)   |
|          |        |                    | Both   | 1990 | 682    | (459 to 931)       | 37.6  | (25.4 to 51.4)   |
|          |        |                    |        | 2013 | 717    | (484 to 985)       | 36.8  | (24.8 to 50.6)   |
|          |        | Hemorrhagic Stroke | Male   | 1990 | 20     | (11 to 33)         | 2.8   | (1.6 to 4.6)     |
|          |        |                    |        | 2013 | 19     | (9 to 35)          | 2.6   | (1.4 to 4.6)     |
|          |        |                    | Female | 1990 | 22     | (12 to 37)         | 2.2   | (1.2 to 3.6)     |
|          |        |                    |        | 2013 | 23     | (12 to 40)         | 2.1   | (1.2 to 3.5)     |
|          |        |                    | Both   | 1990 | 43     | (24 to 65)         | 2.4   | (1.4 to 3.7)     |
|          |        |                    | Both   | 2013 | 42     | (24 to 67)         | 2.4   | (1.4 to 3.7)     |
| Ethiopia | Deaths | Ischemic Stroke    | Male   | 1990 | 6,236  | (2,547 to 10,302)  | 88.2  | (36.9 to 140.8)  |
|          |        |                    |        | 2013 | 10,186 | (3,248 to 17,650)  | 75.1  | (24.4 to 127.0)  |
|          |        |                    | Female | 1990 | 6,147  | (3,206 to 8,395)   | 89.7  | (46.8 to 122.3)  |
|          |        |                    |        | 2013 | 13,077 | (4,788 to 18,927)  | 88.6  | (33.3 to 127.8)  |
|          |        |                    | Both   | 1990 | 12,384 | (6,860 to 16,483)  | 89    | (50.3 to 119.7)  |
|          |        |                    |        | 2013 | 23,264 | (9,603 to 33,336)  | 82.3  | (34.5 to 118.0)  |
|          | Deaths | Hemorrhagic Stroke | Male   | 1990 | 8,577  | (4,056 to 11,721)  | 98.9  | (40.1 to 140.7)  |
|          |        |                    |        | 2013 | 13,488 | (6,316 to 20,961)  | 85.3  | (36.2 to 137.0)  |
|          |        |                    | Female | 1990 | 9,098  | (6,270 to 13,425)  | 105.4 | (68.9 to 158.5)  |
|          |        |                    |        | 2013 | 17,024 | (11,414 to 24,784) | 99.6  | (64.7 to 149.4)  |
|          |        |                    | Both   | 1990 | 17,675 | (12,680 to 22,798) | 102.2 | (68.6 to 137.2)  |
|          |        |                    |        | 2013 | 30,512 | (20,565 to 42,486) | 92.9  | (59.8 to 135.1)  |

|         |         |                    |        |      |             |                      |          |                     |
|---------|---------|--------------------|--------|------|-------------|----------------------|----------|---------------------|
|         | DALYs   | Ischemic Stroke    | Male   | 1990 | 123,339     | (50,255 to 212,765)  | 1423     | (573.7 to 2372.8)   |
|         |         |                    |        | 2013 | 172,140     | (54,193 to 310,439)  | 1075.2   | (341.3 to 1891.0)   |
|         |         |                    | Female | 1990 | 112,227     | (56,010 to 160,990)  | 1342.5   | (698.1 to 1851.9)   |
|         |         |                    |        | 2013 | 202,362     | (72,079 to 297,417)  | 1193.8   | (437.7 to 1735.3)   |
|         |         |                    | Both   | 1990 | 235,567     | (129,218 to 320,545) | 1381.6   | (764.8 to 1848.6)   |
|         |         |                    |        |      |             |                      |          |                     |
|         |         |                    |        |      | Counts, All | Ages                 | Rate     | Per 100,000         |
| Country | measure | Stroke Type        | sex    | year | Mean        | 95% UI               | Age-Mean | standardized 95% UI |
|         |         |                    |        | 2013 | 374,502     | (149,866 to 542,326) | 1138.8   | (464.0 to 1638.6)   |
|         |         | Hemorrhagic Stroke | Male   | 1990 | 220,713     | (122,959 to 292,175) | 2052.1   | (992.5 to 2773.5)   |
|         |         |                    |        | 2013 | 301,583     | (162,552 to 441,827) | 1564.5   | (766.5 to 2389.4)   |
|         |         |                    | Female | 1990 | 224,426     | (161,906 to 317,175) | 2089.3   | (1442.9 to 3060.6)  |
|         |         |                    |        | 2013 | 350,653     | (236,158 to 489,419) | 1752.1   | (1174.7 to 2498.8)  |
|         |         |                    | Both   | 1990 | 445,140     | (336,355 to 547,103) | 2070.4   | (1496.1 to 2649.2)  |
|         |         |                    |        | 2013 | 652,236     | (470,602 to 863,899) | 1664.6   | (1154.7 to 2273.9)  |
|         | YLDs    | Ischemic Stroke    | Male   | 1990 | 602         | (406 to 833)         | 5.4      | (3.7 to 7.6)        |
|         |         |                    |        | 2013 | 1,340       | (904 to 1,870)       | 6.3      | (4.2 to 8.8)        |
|         |         |                    | Female | 1990 | 515         | (339 to 723)         | 4.6      | (3.0 to 6.3)        |
|         |         |                    |        | 2013 | 1,008       | (671 to 1,432)       | 4.4      | (2.9 to 6.2)        |

|                                |         |                    |        |      |             |                  |        |                   |
|--------------------------------|---------|--------------------|--------|------|-------------|------------------|--------|-------------------|
|                                |         |                    | Both   | 1990 | 1,117       | (756 to 1,534)   | 5      | (3.4 to 6.8)      |
|                                |         |                    |        | 2013 | 2,348       | (1,582 to 3,230) | 5.3    | (3.6 to 7.2)      |
|                                |         | Hemorrhagic Stroke | Male   | 1990 | 188         | (123 to 267)     | 1.4    | (0.9 to 2.1)      |
|                                |         |                    |        | 2013 | 440         | (283 to 633)     | 1.7    | (1.1 to 2.5)      |
|                                |         |                    | Female | 1990 | 146         | (96 to 206)      | 1.1    | (0.7 to 1.6)      |
|                                |         |                    |        | 2013 | 281         | (185 to 401)     | 1      | (0.7 to 1.5)      |
|                                |         |                    | Both   | 1990 | 334         | (225 to 463)     | 1.3    | (0.8 to 1.8)      |
|                                |         |                    | Both   | 2013 | 722         | (484 to 1,008)   | 1.4    | (0.9 to 1.9)      |
| Federated States of Micronesia | Deaths  | Ischemic Stroke    | Male   | 1990 | 14          | (8 to 21)        | 93     | (55.0 to 131.4)   |
|                                |         |                    |        | 2013 | 17          | (11 to 26)       | 85.5   | (56.3 to 128.2)   |
|                                |         |                    | Female | 1990 | 9           | (5 to 14)        | 57     | (36.7 to 88.7)    |
|                                |         |                    |        | 2013 | 13          | (8 to 21)        | 58.9   | (35.5 to 88.8)    |
|                                |         |                    | Both   | 1990 | 24          | (15 to 34)       | 74.2   | (49.7 to 102.1)   |
|                                |         |                    |        | 2013 | 31          | (20 to 45)       | 70.8   | (48.3 to 101.5)   |
|                                | Deaths  | Hemorrhagic Stroke | Male   | 1990 | 25          | (15 to 37)       | 130.7  | (78.4 to 186.4)   |
|                                |         |                    |        | 2013 | 29          | (18 to 45)       | 116.2  | (71.7 to 173.0)   |
|                                |         |                    | Female | 1990 | 15          | (9 to 22)        | 79     | (52.0 to 120.0)   |
|                                |         |                    |        | 2013 | 20          | (12 to 32)       | 76.8   | (46.2 to 118.3)   |
|                                |         |                    | Both   | 1990 | 40          | (26 to 57)       | 104.3  | (68.9 to 146.2)   |
|                                |         |                    |        | 2013 | 50          | (31 to 76)       | 95.5   | (61.4 to 139.2)   |
|                                | DALYs   | Ischemic Stroke    | Male   | 1990 | 315         | (174 to 487)     | 1615.3 | (918.2 to 2407.6) |
|                                |         |                    |        | 2013 | 361         | (216 to 588)     | 1426.2 | (914.7 to 2232.7) |
|                                |         |                    | Female | 1990 | 184         | (111 to 286)     | 925.6  | (577.8 to 1439.8) |
|                                |         |                    |        |      | Counts, All | Ages             | Rate   | Per 100,000       |
|                                |         |                    |        |      | Mean        | 95% UI           | Age-   | standardized      |
| Country                        | measure | Stroke Type        | sex    | year | Mean        | 95% UI           | Mean   | 95% UI            |

|      |        |                    |        |      |       |                |        |                    |
|------|--------|--------------------|--------|------|-------|----------------|--------|--------------------|
|      |        |                    |        | 2013 | 244   | (127 to 398)   | 903.5  | (497.5 to 1450.9)  |
|      |        |                    |        |      |       |                |        |                    |
|      |        |                    | Both   | 1990 | 499   | (303 to 743)   | 1259.5 | (791.1 to 1804.2)  |
|      |        |                    |        | 2013 | 605   | (362 to 961)   | 1147.2 | (715.7 to 1746.4)  |
|      |        | Hemorrhagic Stroke | Male   | 1990 | 764   | (465 to 1,163) | 3083.7 | (1814.7 to 4631.0) |
|      |        |                    |        | 2013 | 857   | (509 to 1,367) | 2675.2 | (1614.3 to 4156.1) |
|      |        |                    | Female | 1990 | 394   | (247 to 613)   | 1654.2 | (1045.5 to 2603.5) |
|      |        |                    |        | 2013 | 474   | (271 to 767)   | 1522.7 | (878.7 to 2437.9)  |
|      |        |                    | Both   | 1990 | 1,158 | (737 to 1,744) | 2363.2 | (1511.1 to 3510.1) |
|      |        |                    |        | 2013 | 1,331 | (816 to 2,121) | 2083.5 | (1290.1 to 3237.2) |
|      | YLDs   | Ischemic Stroke    | Male   | 1990 | 4     | (2 to 6)       | 25     | (16.1 to 36.0)     |
|      |        |                    |        | 2013 | 6     | (4 to 9)       | 25.6   | (16.5 to 36.9)     |
|      |        |                    | Female | 1990 | 3     | (2 to 5)       | 18.8   | (12.2 to 27.2)     |
|      |        |                    |        | 2013 | 5     | (3 to 8)       | 21     | (13.9 to 28.9)     |
|      |        |                    | Both   | 1990 | 8     | (5 to 11)      | 21.8   | (14.5 to 31.0)     |
|      |        |                    |        | 2013 | 12    | (7 to 16)      | 23.1   | (15.3 to 31.7)     |
|      |        | Hemorrhagic Stroke | Male   | 1990 | 5     | (3 to 8)       | 29.4   | (19.0 to 41.9)     |
|      |        |                    |        | 2013 | 8     | (5 to 11)      | 30.5   | (20.4 to 43.5)     |
|      |        |                    | Female | 1990 | 4     | (2 to 6)       | 20.2   | (13.2 to 29.0)     |
|      |        |                    |        | 2013 | 6     | (4 to 9)       | 22.6   | (14.7 to 31.5)     |
|      |        |                    | Both   | 1990 | 10    | (6 to 14)      | 24.7   | (16.4 to 34.6)     |
|      |        |                    | Both   | 2013 | 14    | (10 to 20)     | 26.2   | (17.7 to 36.3)     |
| Fiji | Deaths | Ischemic Stroke    | Male   | 1990 | 94    | (60 to 142)    | 87.7   | (58.2 to 125.4)    |
|      |        |                    |        | 2013 | 95    | (67 to 136)    | 50.2   | (35.7 to 69.6)     |
|      |        |                    | Female | 1990 | 108   | (51 to 168)    | 97.9   | (49.3 to 143.8)    |
|      |        |                    |        | 2013 | 98    | (72 to 149)    | 44.5   | (32.6 to 66.2)     |

|         |         |                    |        |      |             |                    |        |                    |
|---------|---------|--------------------|--------|------|-------------|--------------------|--------|--------------------|
|         |         |                    | Both   | 1990 | 202         | (126 to 295)       | 93.1   | (58.9 to 128.6)    |
|         |         |                    |        | 2013 | 194         | (152 to 263)       | 47.1   | (37.2 to 63.5)     |
|         | Deaths  | Hemorrhagic Stroke | Male   | 1990 | 152         | (98 to 228)        | 99.7   | (62.1 to 147.7)    |
|         |         |                    |        | 2013 | 228         | (169 to 301)       | 88.9   | (66.7 to 114.6)    |
|         |         |                    | Female | 1990 | 198         | (116 to 271)       | 142.1  | (86.6 to 189.3)    |
|         |         |                    |        | 2013 | 231         | (174 to 335)       | 88.1   | (67.9 to 124.5)    |
|         |         |                    | Both   | 1990 | 351         | (258 to 451)       | 121.5  | (89.4 to 153.7)    |
|         |         |                    |        | 2013 | 460         | (372 to 575)       | 89.1   | (73.8 to 110.7)    |
|         | DALYs   | Ischemic Stroke    | Male   | 1990 | 2,212       | (1,378 to 3,627)   | 1458.3 | (948.0 to 2202.7)  |
|         |         |                    |        | 2013 | 2,066       | (1,427 to 2,995)   | 790.2  | (568.5 to 1109.5)  |
|         |         |                    | Female | 1990 | 2,351       | (1,069 to 3,809)   | 1592.3 | (751.9 to 2492.1)  |
|         |         |                    |        | 2013 | 1,922       | (1,404 to 2,931)   | 674.3  | (501.2 to 1018.4)  |
|         |         |                    |        |      | Counts, All | Ages               | Rate   | Per 100,000        |
|         |         |                    |        |      |             |                    | Age-   | standardized       |
| Country | measure | Stroke Type        | sex    | year | Mean        | 95% UI             | Mean   | 95% UI             |
|         |         |                    | Both   | 1990 | 4,564       | (2,804 to 7,047)   | 1526.5 | (956.6 to 2227.7)  |
|         |         |                    |        | 2013 | 3,988       | (3,059 to 5,475)   | 728.2  | (572.5 to 985.8)   |
|         |         | Hemorrhagic Stroke | Male   | 1990 | 5,328       | (3,543 to 7,889)   | 2350.7 | (1516.9 to 3503.9) |
|         |         |                    |        | 2013 | 6,841       | (5,054 to 9,171)   | 1970.3 | (1473.6 to 2593.2) |
|         |         |                    | Female | 1990 | 5,704       | (3,370 to 7,893)   | 3000.2 | (1768.9 to 4120.4) |
|         |         |                    |        | 2013 | 5,825       | (4,268 to 8,521)   | 1724.9 | (1299.5 to 2485.2) |
|         |         |                    | Both   | 1990 | 11,033      | (8,225 to 14,151)  | 2679.2 | (1972.1 to 3435.1) |
|         |         |                    |        | 2013 | 12,667      | (10,069 to 15,951) | 1853.7 | (1497.2 to 2300.1) |
|         | YLDs    | Ischemic Stroke    | Male   | 1990 | 34          | (22 to 48)         | 25.3   | (16.6 to 34.9)     |
|         |         |                    |        | 2013 | 64          | (40 to 94)         | 24     | (14.9 to 35.3)     |
|         |         |                    | Female | 1990 | 28          | (18 to 41)         | 20.6   | (13.1 to 30.2)     |
|         |         |                    |        | 2013 | 61          | (39 to 87)         | 20.9   | (13.7 to 29.5)     |



|         |        |                    |        |      |        |                    |        |                   |
|---------|--------|--------------------|--------|------|--------|--------------------|--------|-------------------|
|         |        |                    | Both   | 1990 | 62     | (42 to 84)         | 22.8   | (15.6 to 30.7)    |
|         |        |                    |        | 2013 | 125    | (81 to 177)        | 22.4   | (14.6 to 31.6)    |
|         |        | Hemorrhagic Stroke | Male   | 1990 | 47     | (31 to 66)         | 29.9   | (19.8 to 41.1)    |
|         |        |                    |        | 2013 | 86     | (57 to 122)        | 28.9   | (18.8 to 41.5)    |
|         |        |                    | Female | 1990 | 35     | (22 to 48)         | 21.9   | (14.0 to 30.6)    |
|         |        |                    |        | 2013 | 70     | (44 to 102)        | 22.5   | (14.4 to 32.7)    |
|         |        |                    | Both   | 1990 | 82     | (56 to 110)        | 25.8   | (17.7 to 34.4)    |
|         |        |                    | Both   | 2013 | 156    | (103 to 217)       | 25.5   | (16.9 to 35.8)    |
| Finland | Deaths | Ischemic Stroke    | Male   | 1990 | 1,487  | (1,209 to 1,856)   | 69.7   | (56.9 to 87.4)    |
|         |        |                    |        | 2013 | 1,609  | (1,218 to 2,000)   | 37.8   | (28.7 to 46.8)    |
|         |        |                    | Female | 1990 | 2,798  | (2,102 to 3,202)   | 61.7   | (46.3 to 70.8)    |
|         |        |                    |        | 2013 | 2,162  | (1,715 to 3,142)   | 27.9   | (22.5 to 40.7)    |
|         |        |                    | Both   | 1990 | 4,285  | (3,593 to 4,819)   | 65.4   | (54.8 to 73.6)    |
|         |        |                    |        | 2013 | 3,771  | (3,220 to 4,850)   | 32.3   | (27.6 to 41.1)    |
|         | Deaths | Hemorrhagic Stroke | Male   | 1990 | 730    | (574 to 976)       | 30.2   | (23.4 to 40.6)    |
|         |        |                    |        | 2013 | 841    | (587 to 1,074)     | 20.3   | (14.2 to 25.8)    |
|         |        |                    | Female | 1990 | 1,062  | (808 to 1,325)     | 26.3   | (20.2 to 32.7)    |
|         |        |                    |        | 2013 | 832    | (637 to 1,255)     | 13.3   | (10.6 to 19.8)    |
|         |        |                    | Both   | 1990 | 1,792  | (1,496 to 2,195)   | 28.2   | (23.6 to 34.4)    |
|         |        |                    |        | 2013 | 1,674  | (1,375 to 2,146)   | 16.5   | (13.7 to 20.9)    |
|         | DALYs  | Ischemic Stroke    | Male   | 1990 | 23,667 | (19,835 to 29,105) | 1011.6 | (844.3 to 1248.1) |
|         |        |                    |        | 2013 | 21,488 | (17,297 to 25,747) | 508.3  | (409.0 to 609.4)  |
|         |        |                    | Female | 1990 | 31,172 | (24,193 to 35,228) | 724.3  | (556.9 to 817.2)  |
|         |        |                    |        | 2013 | 19,009 | (15,708 to 26,448) | 291.1  | (242.2 to 398.7)  |
|         |        |                    | Both   | 1990 | 54,840 | (47,501 to 61,422) | 843.9  | (732.1 to 946.4)  |
|         |        |                    |        | 2013 | 40,497 | (34,913 to 48,853) | 388.1  | (333.8 to 464.1)  |
|         |        | Hemorrhagic        | Male   | 1990 | 17,681 | (14,427 to 23,265) | 675.2  | (549.8 to 887.2)  |

| Country | measure | Stroke Type        | sex    | year | Counts, All Ages |                    | Rate Per 100,000 Age-standardized |                  |
|---------|---------|--------------------|--------|------|------------------|--------------------|-----------------------------------|------------------|
|         |         |                    |        |      | Mean             | 95% UI             | Mean                              | 95% UI           |
|         |         |                    |        | 2013 | 16,166           | (11,704 to 19,968) | 411.6                             | (300.8 to 507.4) |
|         |         |                    | Female | 1990 | 18,429           | (14,733 to 22,720) | 515.2                             | (413.3 to 630.8) |
|         |         |                    |        | 2013 | 11,351           | (9,290 to 16,392)  | 236.2                             | (195.9 to 341.9) |
|         |         |                    | Both   | 1990 | 36,111           | (31,555 to 42,931) | 590.8                             | (516.7 to 695.3) |
|         |         |                    |        | 2013 | 27,518           | (23,197 to 33,432) | 319.6                             | (269.2 to 383.0) |
|         | YLDs    | Ischemic Stroke    | Male   | 1990 | 2,594            | (1,753 to 3,617)   | 103.8                             | (70.5 to 144.5)  |
|         |         |                    |        | 2013 | 3,256            | (2,065 to 4,647)   | 78.5                              | (50.0 to 111.9)  |
|         |         |                    | Female | 1990 | 2,564            | (1,694 to 3,519)   | 66                                | (43.4 to 90.1)   |
|         |         |                    |        | 2013 | 2,723            | (1,775 to 3,851)   | 50.6                              | (33.0 to 71.2)   |
|         |         |                    | Both   | 1990 | 5,158            | (3,526 to 6,965)   | 81.4                              | (55.3 to 109.7)  |
|         |         |                    |        | 2013 | 5,979            | (4,055 to 8,175)   | 63.3                              | (42.8 to 86.6)   |
|         |         | Hemorrhagic Stroke | Male   | 1990 | 722              | (467 to 1,033)     | 28.7                              | (18.7 to 41.0)   |
|         |         |                    |        | 2013 | 892              | (573 to 1,350)     | 22.6                              | (14.6 to 33.8)   |
|         |         |                    | Female | 1990 | 710              | (466 to 985)       | 19.4                              | (12.8 to 27.1)   |
|         |         |                    |        | 2013 | 739              | (471 to 1,033)     | 15.8                              | (10.3 to 21.9)   |
|         |         |                    | Both   | 1990 | 1,433            | (950 to 1,976)     | 23.1                              | (15.3 to 31.7)   |
|         |         |                    | Both   | 2013 | 1,632            | (1,117 to 2,257)   | 18.8                              | (12.8 to 26.1)   |
| France  | Deaths  | Ischemic Stroke    | Male   | 1990 | 11,562           | (9,234 to 14,185)  | 38.5                              | (30.7 to 47.2)   |
|         |         |                    |        | 2013 | 10,914           | (7,876 to 13,895)  | 20.1                              | (14.6 to 25.5)   |
|         |         |                    | Female | 1990 | 19,479           | (13,669 to 22,745) | 32.2                              | (22.8 to 37.2)   |
|         |         |                    |        | 2013 | 16,566           | (12,723 to 24,286) | 16.4                              | (12.7 to 23.8)   |
|         |         |                    | Both   | 1990 | 31,041           | (25,040 to 34,953) | 35                                | (28.6 to 39.3)   |
|         |         |                    |        | 2013 | 27,480           | (22,372 to 36,083) | 18.1                              | (14.8 to 23.3)   |
|         | Deaths  | Hemorrhagic Stroke | Male   | 1990 | 8,962            | (7,070 to 11,355)  | 29.5                              | (23.3 to 37.5)   |

|                  |         |                       |        |      |         |                      |                                      |                                       |
|------------------|---------|-----------------------|--------|------|---------|----------------------|--------------------------------------|---------------------------------------|
|                  |         |                       |        | 2013 | 9,519   | (6,647 to 12,322)    | 18.7                                 | (13.4 to 23.9)                        |
|                  |         |                       | Female | 1990 | 12,380  | (8,748 to 16,174)    | 23.1                                 | (16.9 to 29.3)                        |
|                  |         |                       |        | 2013 | 12,081  | (9,101 to 16,877)    | 13.9                                 | (10.9 to 19.2)                        |
|                  |         |                       | Both   | 1990 | 21,342  | (17,812 to 26,206)   | 26.1                                 | (22.1 to 31.5)                        |
|                  |         |                       |        | 2013 | 21,601  | (17,143 to 26,533)   | 16                                   | (13.0 to 19.2)                        |
|                  | DALYs   | Ischemic Stroke       | Male   | 1990 | 163,087 | (135,944 to 192,251) | 537.9                                | (447.3 to 633.9)                      |
|                  |         |                       |        | 2013 | 145,962 | (114,086 to 178,742) | 298.7                                | (233.9 to 366.0)                      |
|                  |         |                       | Female | 1990 | 187,008 | (141,468 to 213,227) | 358.1                                | (275.0 to 407.2)                      |
|                  |         |                       |        | 2013 | 147,223 | (118,710 to 197,032) | 190.6                                | (153.0 to 250.8)                      |
|                  |         |                       | Both   | 1990 | 350,096 | (301,967 to 392,056) | 434.1                                | (377.0 to 486.7)                      |
|                  |         |                       |        | 2013 | 293,186 | (244,491 to 354,625) | 238.6                                | (197.0 to 285.7)                      |
| Counts, All Ages |         |                       |        |      |         |                      |                                      |                                       |
| Country          | measure | Stroke Type           | sex    | year | Mean    | 95% UI               | Rate<br>Age-<br>standardized<br>Mean | Per 100,000<br>standardized<br>95% UI |
|                  |         | Hemorrhagic<br>Stroke | Male   | 1990 | 164,931 | (134,033 to 200,675) | 543.7                                | (444.2 to 658.5)                      |
|                  |         |                       |        | 2013 | 133,164 | (99,967 to 165,152)  | 298.3                                | (226.2 to 365.6)                      |
|                  |         |                       | Female | 1990 | 150,957 | (115,931 to 187,711) | 355.7                                | (277.9 to 438.9)                      |
|                  |         |                       |        | 2013 | 117,018 | (94,274 to 155,391)  | 192.2                                | (160.0 to 252.5)                      |
|                  |         |                       | Both   | 1990 | 315,888 | (274,220 to 368,738) | 441.7                                | (386.0 to 510.1)                      |
|                  |         |                       |        | 2013 | 250,183 | (209,169 to          | 240.7                                | (202.0 to 278.0)                      |

|       |        |                    |        |      |        |                     |        |                    |
|-------|--------|--------------------|--------|------|--------|---------------------|--------|--------------------|
|       |        |                    |        |      |        | 293,380)            |        |                    |
|       | YLDs   | Ischemic Stroke    | Male   | 1990 | 24,896 | (16,017 to 35,588)  | 81.4   | (52.2 to 116.0)    |
|       |        |                    |        | 2013 | 38,863 | (25,381 to 54,822)  | 84.8   | (55.4 to 120.0)    |
|       |        |                    | Female | 1990 | 25,010 | (16,220 to 35,536)  | 57.6   | (38.1 to 80.8)     |
|       |        |                    |        | 2013 | 35,395 | (21,983 to 51,440)  | 57.5   | (37.0 to 81.2)     |
|       |        |                    | Both   | 1990 | 49,906 | (34,732 to 68,905)  | 67.4   | (47.2 to 92.1)     |
|       |        |                    |        | 2013 | 74,258 | (49,579 to 100,000) | 69.9   | (47.0 to 94.3)     |
|       |        | Hemorrhagic Stroke | Male   | 1990 | 3,325  | (1,858 to 5,507)    | 10.9   | (6.1 to 17.9)      |
|       |        |                    |        | 2013 | 2,397  | (1,472 to 3,642)    | 5.4    | (3.4 to 8.2)       |
|       |        |                    | Female | 1990 | 1,500  | (890 to 2,255)      | 3.7    | (2.2 to 5.6)       |
|       |        |                    |        | 2013 | 2,540  | (1,452 to 4,149)    | 4.5    | (2.6 to 7.2)       |
|       |        |                    | Both   | 1990 | 4,825  | (2,866 to 7,356)    | 6.8    | (4.1 to 10.2)      |
|       |        |                    | Both   | 2013 | 4,937  | (3,117 to 7,281)    | 4.9    | (3.1 to 7.2)       |
| Gabon | Deaths | Ischemic Stroke    | Male   | 1990 | 329    | (199 to 444)        | 145.9  | (89.8 to 192.6)    |
|       |        |                    |        | 2013 | 574    | (385 to 776)        | 154.5  | (105.8 to 204.9)   |
|       |        |                    | Female | 1990 | 314    | (182 to 417)        | 114.6  | (68.8 to 152.7)    |
|       |        |                    |        | 2013 | 545    | (361 to 750)        | 117.7  | (77.9 to 161.5)    |
|       |        |                    | Both   | 1990 | 643    | (412 to 786)        | 128.4  | (83.5 to 156.7)    |
|       |        |                    |        | 2013 | 1,120  | (831 to 1,390)      | 135    | (101.1 to 167.8)   |
|       | Deaths | Hemorrhagic Stroke | Male   | 1990 | 366    | (266 to 491)        | 141.6  | (102.1 to 196.6)   |
|       |        |                    |        | 2013 | 605    | (417 to 835)        | 141.6  | (99.8 to 196.9)    |
|       |        |                    | Female | 1990 | 356    | (246 to 534)        | 115.3  | (79.5 to 178.2)    |
|       |        |                    |        | 2013 | 513    | (310 to 826)        | 107    | (64.1 to 172.7)    |
|       |        |                    | Both   | 1990 | 722    | (590 to 951)        | 127.4  | (104.2 to 170.7)   |
|       |        |                    |        | 2013 | 1,119  | (867 to 1,516)      | 124    | (96.0 to 168.1)    |
|       | DALYs  | Ischemic Stroke    | Male   | 1990 | 6,116  | (3,574 to 8,538)    | 2345.5 | (1388.9 to 3209.2) |

|                  |         |                    |        | 2013 | 10,548 | (6,380 to 15,866)  | 2510.1 | (1609.0 to 3607.4) |
|------------------|---------|--------------------|--------|------|--------|--------------------|--------|--------------------|
|                  |         |                    | Female | 1990 | 4,850  | (2,621 to 6,532)   | 1551.2 | (874.6 to 2064.7)  |
|                  |         |                    |        | 2013 | 7,613  | (4,735 to 10,814)  | 1581   | (995.5 to 2242.7)  |
|                  |         |                    | Both   | 1990 | 10,967 | (6,862 to 13,570)  | 1905.7 | (1205.5 to 2337.3) |
| Counts, All Ages |         |                    |        |      |        |                    |        |                    |
|                  |         |                    |        |      |        |                    | Rate   | Per 100,000        |
|                  |         |                    |        |      |        |                    | Age-   | standardized       |
| Country          | measure | Stroke Type        | sex    | year | Mean   | 95% UI             | Mean   | 95% UI             |
|                  |         |                    |        | 2013 | 18,162 | (12,440 to 24,046) | 2023.3 | (1429.8 to 2632.4) |
|                  |         | Hemorrhagic Stroke | Male   | 1990 | 9,299  | (6,881 to 12,135)  | 3131.4 | (2311.2 to 4139.2) |
|                  |         |                    |        | 2013 | 16,190 | (10,808 to 22,560) | 3214.2 | (2171.7 to 4479.3) |
|                  |         |                    | Female | 1990 | 7,604  | (5,259 to 10,761)  | 2179.3 | (1521.0 to 3108.1) |
|                  |         |                    |        | 2013 | 10,361 | (6,398 to 16,801)  | 2012.9 | (1228.2 to 3238.8) |
|                  |         |                    | Both   | 1990 | 16,904 | (13,872 to 21,118) | 2619.5 | (2154.1 to 3294.8) |
|                  |         |                    |        | 2013 | 26,551 | (20,420 to 35,371) | 2607.1 | (2010.5 to 3487.0) |
|                  | YLDs    | Ischemic Stroke    | Male   | 1990 | 42     | (27 to 59)         | 14.9   | (9.7 to 21.0)      |
|                  |         |                    |        | 2013 | 65     | (41 to 94)         | 13.9   | (8.6 to 19.9)      |
|                  |         |                    | Female | 1990 | 38     | (24 to 54)         | 11.1   | (7.1 to 15.8)      |
|                  |         |                    |        | 2013 | 58     | (36 to 83)         | 11.2   | (7.1 to 16.3)      |
|                  |         |                    | Both   | 1990 | 80     | (53 to 110)        | 12.8   | (8.5 to 17.6)      |
|                  |         |                    |        | 2013 | 124    | (80 to 171)        | 12.5   | (8.1 to 17.2)      |
|                  |         | Hemorrhagic Stroke | Male   | 1990 | 11     | (7 to 16)          | 3.8    | (2.3 to 5.5)       |
|                  |         |                    |        | 2013 | 19     | (11 to 29)         | 3.7    | (2.2 to 5.5)       |
|                  |         |                    | Female | 1990 | 9      | (5 to 14)          | 2.7    | (1.7 to 4.0)       |
|                  |         |                    |        | 2013 | 14     | (9 to 21)          | 2.6    | (1.6 to 3.8)       |
|                  |         |                    | Both   | 1990 | 21     | (13 to 29)         | 3.2    | (2.1 to 4.5)       |
|                  |         |                    | Both   | 2013 | 34     | (22 to 48)         | 3.1    | (2.0 to 4.4)       |
| Georgia          | Deaths  | Ischemic Stroke    | Male   | 1990 | 2,257  | (1,601 to 2,939)   | 129.3  | (92.1 to 167.8)    |

|         |         |                    |        |      |             |                      |        |                    |
|---------|---------|--------------------|--------|------|-------------|----------------------|--------|--------------------|
|         |         |                    |        | 2013 | 2,413       | (1,868 to 3,379)     | 100.2  | (77.4 to 140.7)    |
|         |         |                    | Female | 1990 | 3,178       | (2,356 to 4,024)     | 96.8   | (71.3 to 122.4)    |
|         |         |                    |        | 2013 | 2,436       | (1,913 to 3,195)     | 56.1   | (44.2 to 73.1)     |
|         |         |                    | Both   | 1990 | 5,436       | (4,209 to 6,434)     | 109    | (84.4 to 128.7)    |
|         |         |                    |        | 2013 | 4,849       | (4,107 to 6,266)     | 73.3   | (62.1 to 94.7)     |
|         | Deaths  | Hemorrhagic Stroke | Male   | 1990 | 2,681       | (2,105 to 3,455)     | 135.2  | (104.5 to 179.7)   |
|         |         |                    |        | 2013 | 3,887       | (2,776 to 4,628)     | 162.8  | (117.5 to 194.5)   |
|         |         |                    | Female | 1990 | 3,255       | (2,442 to 4,458)     | 97.3   | (72.9 to 133.4)    |
|         |         |                    |        | 2013 | 4,083       | (2,669 to 4,974)     | 99.7   | (66.6 to 121.2)    |
|         |         |                    | Both   | 1990 | 5,936       | (4,947 to 7,586)     | 111.8  | (92.6 to 144.1)    |
|         |         |                    |        | 2013 | 7,970       | (5,855 to 9,124)     | 125.4  | (93.0 to 143.3)    |
|         | DALYs   | Ischemic Stroke    | Male   | 1990 | 39,826      | (28,419 to 52,420)   | 1949.5 | (1398.2 to 2522.9) |
|         |         |                    |        | 2013 | 37,346      | (28,754 to 52,534)   | 1512   | (1168.9 to 2125.2) |
|         |         |                    | Female | 1990 | 40,857      | (29,946 to 52,913)   | 1219.1 | (894.1 to 1579.9)  |
|         |         |                    |        | 2013 | 26,951      | (21,280 to 34,669)   | 673.1  | (531.1 to 869.5)   |
|         |         |                    | Both   | 1990 | 80,684      | (62,574 to 97,983)   | 1507.7 | (1170.5 to 1825.5) |
|         |         |                    |        | 2013 | 64,297      | (53,961 to 83,303)   | 1016.1 | (849.2 to 1318.3)  |
|         |         | Hemorrhagic Stroke | Male   | 1990 | 61,212      | (48,704 to 77,284)   | 2649.5 | (2117.7 to 3367.9) |
|         |         |                    |        |      | Counts, All | Ages                 | Rate   | Per 100,000        |
|         |         |                    |        |      |             |                      | Age-   | standardized       |
| Country | measure | Stroke Type        | sex    | year | Mean        | 95% UI               | Mean   | 95% UI             |
|         |         |                    |        | 2013 | 71,664      | (53,335 to 85,772)   | 2964   | (2225.4 to 3542.8) |
|         |         |                    | Female | 1990 | 57,875      | (45,843 to 74,722)   | 1720.8 | (1371.6 to 2234.9) |
|         |         |                    |        | 2013 | 53,779      | (37,887 to 65,288)   | 1490.4 | (1070.9 to 1796.9) |
|         |         |                    | Both   | 1990 | 119,087     | (101,166 to 147,502) | 2108.5 | (1782.4 to 2630.1) |
|         |         |                    |        | 2013 | 125,444     | (97,929 to 143,650)  | 2118   | (1674.6 to 2418.8) |

|         |        |                    |        |      |         |                      |       |                   |
|---------|--------|--------------------|--------|------|---------|----------------------|-------|-------------------|
|         | YLDs   | Ischemic Stroke    | Male   | 1990 | 198     | (126 to 297)         | 8.5   | (5.5 to 12.6)     |
|         |        |                    |        | 2013 | 210     | (126 to 311)         | 8.6   | (5.2 to 12.8)     |
|         |        |                    | Female | 1990 | 273     | (167 to 403)         | 8.1   | (5.0 to 11.9)     |
|         |        |                    |        | 2013 | 271     | (172 to 396)         | 7.9   | (5.0 to 11.4)     |
|         |        |                    | Both   | 1990 | 472     | (316 to 671)         | 8.3   | (5.6 to 11.8)     |
|         |        |                    |        | 2013 | 481     | (313 to 661)         | 8.2   | (5.3 to 11.3)     |
|         |        | Hemorrhagic Stroke | Male   | 1990 | 197     | (123 to 293)         | 8     | (5.0 to 12.0)     |
|         |        |                    |        | 2013 | 190     | (116 to 287)         | 8     | (4.9 to 12.1)     |
|         |        |                    | Female | 1990 | 156     | (97 to 234)          | 4.8   | (3.0 to 7.1)      |
|         |        |                    |        | 2013 | 159     | (98 to 234)          | 5     | (3.1 to 7.2)      |
|         |        |                    | Both   | 1990 | 353     | (229 to 497)         | 6.2   | (4.0 to 8.7)      |
|         |        |                    | Both   | 2013 | 350     | (235 to 493)         | 6.3   | (4.2 to 8.9)      |
| Germany | Deaths | Ischemic Stroke    | Male   | 1990 | 27,606  | (22,086 to 33,383)   | 70.1  | (55.8 to 84.7)    |
|         |        |                    |        | 2013 | 21,498  | (16,124 to 27,296)   | 28.7  | (21.5 to 36.5)    |
|         |        |                    | Female | 1990 | 55,502  | (39,143 to 62,849)   | 61.2  | (43.8 to 69.2)    |
|         |        |                    |        | 2013 | 31,488  | (24,204 to 46,501)   | 24.9  | (19.3 to 36.6)    |
|         |        |                    | Both   | 1990 | 83,109  | (65,982 to 92,617)   | 64.7  | (51.6 to 72.1)    |
|         |        |                    |        | 2013 | 52,986  | (43,056 to 68,992)   | 26.8  | (21.9 to 34.7)    |
|         | Deaths | Hemorrhagic Stroke | Male   | 1990 | 13,851  | (10,570 to 17,824)   | 33.7  | (25.7 to 43.5)    |
|         |        |                    |        | 2013 | 13,320  | (8,838 to 17,994)    | 18.4  | (12.3 to 24.9)    |
|         |        |                    | Female | 1990 | 25,176  | (17,597 to 30,750)   | 30.6  | (21.9 to 37.4)    |
|         |        |                    |        | 2013 | 15,677  | (11,994 to 24,147)   | 13.9  | (11.1 to 21.0)    |
|         |        |                    | Both   | 1990 | 39,027  | (31,085 to 46,522)   | 32.1  | (25.9 to 38.1)    |
|         |        |                    |        | 2013 | 28,998  | (23,561 to 38,360)   | 16    | (13.1 to 20.8)    |
|         | DALYs  | Ischemic Stroke    | Male   | 1990 | 391,750 | (321,909 to 463,650) | 957.6 | (787.3 to 1129.6) |
|         |        |                    |        | 2013 | 319,296 | (255,061 to          | 435.8 | (347.6 to 528.2)  |

|         |         |                    |        |      |             |                        |       |                  |
|---------|---------|--------------------|--------|------|-------------|------------------------|-------|------------------|
|         |         |                    |        |      |             | 387,568)               |       |                  |
|         |         |                    | Female | 1990 | 577,330     | (424,305 to 644,195)   | 699.2 | (516.4 to 781.1) |
|         |         |                    |        | 2013 | 325,205     | (268,044 to 436,797)   | 304   | (249.4 to 406.0) |
|         |         |                    | Both   | 1990 | 969,080     | (804,862 to 1,070,095) | 799.8 | (668.5 to 885.5) |
|         |         |                    |        |      |             |                        |       |                  |
|         |         |                    |        |      | Counts, All | Ages                   | Rate  | Per 100,000      |
|         |         |                    |        |      |             |                        | Age-  | standardized     |
| Country | measure | Stroke Type        | sex    | year | Mean        | 95% UI                 | Mean  | 95% UI           |
|         |         |                    |        | 2013 | 644,502     | (545,740 to 775,506)   | 365.2 | (309.4 to 436.9) |
|         |         | Hemorrhagic Stroke | Male   | 1990 | 254,039     | (199,582 to 316,902)   | 590.3 | (464.9 to 737.8) |
|         |         |                    |        | 2013 | 202,975     | (148,935 to 257,423)   | 299   | (223.8 to 377.3) |
|         |         |                    | Female | 1990 | 334,785     | (255,175 to 406,305)   | 485.1 | (379.8 to 588.4) |
|         |         |                    |        | 2013 | 184,433     | (153,147 to 258,615)   | 213.4 | (179.6 to 288.9) |
|         |         |                    | Both   | 1990 | 588,825     | (498,739 to 680,147)   | 530.8 | (452.5 to 609.2) |
|         |         |                    |        | 2013 | 387,408     | (328,395 to 479,657)   | 252.7 | (216.2 to 305.8) |
|         | YLDs    | Ischemic Stroke    | Male   | 1990 | 42,948      | (29,440 to 59,483)     | 100.8 | (69.2 to 139.5)  |
|         |         |                    |        | 2013 | 80,541      | (53,765 to 109,201)    | 114.4 | (76.1 to 155.3)  |
|         |         |                    | Female | 1990 | 46,731      | (30,945 to 66,506)     | 65.3  | (43.1 to 93.7)   |
|         |         |                    |        | 2013 | 75,335      | (51,480 to 101,255)    | 83.3  | (57.1 to 111.7)  |



|         |         |                    |        |      |             |                      |        |                    |
|---------|---------|--------------------|--------|------|-------------|----------------------|--------|--------------------|
|         |         |                    | Both   | 1990 | 89,680      | (62,290 to 120,738)  | 79.3   | (55.0 to 107.1)    |
|         |         |                    |        | 2013 | 155,876     | (109,649 to 207,427) | 97.7   | (68.6 to 130.8)    |
|         |         | Hemorrhagic Stroke | Male   | 1990 | 6,510       | (4,052 to 9,370)     | 15.3   | (9.5 to 22.0)      |
|         |         |                    |        | 2013 | 15,561      | (9,871 to 22,564)    | 23.2   | (15.0 to 33.1)     |
|         |         |                    | Female | 1990 | 11,974      | (7,383 to 17,507)    | 18.5   | (11.4 to 27.4)     |
|         |         |                    |        | 2013 | 19,283      | (12,709 to 27,629)   | 24.1   | (16.0 to 34.2)     |
|         |         |                    | Both   | 1990 | 18,485      | (12,008 to 25,643)   | 17     | (11.1 to 23.6)     |
|         |         |                    | Both   | 2013 | 34,845      | (23,733 to 47,259)   | 23.6   | (15.9 to 32.0)     |
| Ghana   | Deaths  | Ischemic Stroke    | Male   | 1990 | 1,195       | (889 to 1,604)       | 66.6   | (50.6 to 86.6)     |
|         |         |                    |        | 2013 | 5,093       | (4,008 to 6,155)     | 130.6  | (105.2 to 157.0)   |
|         |         |                    | Female | 1990 | 1,096       | (606 to 2,554)       | 59.3   | (33.0 to 134.2)    |
|         |         |                    |        | 2013 | 6,341       | (3,364 to 8,581)     | 132.2  | (70.6 to 177.5)    |
|         |         |                    | Both   | 1990 | 2,292       | (1,591 to 3,778)     | 62.9   | (43.9 to 104.4)    |
|         |         |                    |        | 2013 | 11,434      | (8,183 to 13,911)    | 133    | (95.3 to 162.0)    |
|         | Deaths  | Hemorrhagic Stroke | Male   | 1990 | 721         | (490 to 983)         | 24.4   | (15.5 to 34.5)     |
|         |         |                    |        | 2013 | 1,965       | (1,418 to 2,685)     | 33.8   | (23.7 to 47.4)     |
|         |         |                    | Female | 1990 | 696         | (447 to 1,365)       | 24.6   | (15.2 to 49.1)     |
|         |         |                    |        | 2013 | 2,434       | (1,380 to 3,305)     | 38.6   | (22.3 to 52.2)     |
|         |         |                    | Both   | 1990 | 1,418       | (1,056 to 2,051)     | 24.6   | (17.1 to 36.6)     |
|         |         |                    |        | 2013 | 4,399       | (3,299 to 5,483)     | 36.7   | (27.8 to 46.2)     |
|         |         |                    |        |      | Counts, All | Ages                 | Rate   | Per 100,000        |
|         |         |                    |        |      | Mean        | 95% UI               | Age-   | standardized       |
| Country | measure | Stroke Type        | sex    | year | Mean        | 95% UI               | Mean   | 95% UI             |
|         | DALYs   | Ischemic Stroke    | Male   | 1990 | 26,875      | (19,287 to 36,807)   | 1070.7 | (801.5 to 1417.4)  |
|         |         |                    |        | 2013 | 108,020     | (82,282 to 132,761)  | 2136.1 | (1675.2 to 2578.8) |

|        |        |                    |        |      |         |                      |        |                    |
|--------|--------|--------------------|--------|------|---------|----------------------|--------|--------------------|
|        |        |                    | Female | 1990 | 21,801  | (12,187 to 50,169)   | 868.5  | (483.7 to 2000.3)  |
|        |        |                    |        | 2013 | 104,330 | (54,784 to 145,123)  | 1863.1 | (998.2 to 2553.4)  |
|        |        |                    | Both   | 1990 | 48,676  | (33,507 to 79,517)   | 967.6  | (679.1 to 1581.7)  |
|        |        |                    |        | 2013 | 212,350 | (151,949 to 259,951) | 2004.6 | (1438.7 to 2439.4) |
|        |        | Hemorrhagic Stroke | Male   | 1990 | 27,082  | (19,460 to 35,248)   | 606.5  | (410.0 to 826.3)   |
|        |        |                    |        | 2013 | 68,821  | (49,035 to 91,893)   | 855.2  | (617.7 to 1169.5)  |
|        |        |                    | Female | 1990 | 23,802  | (15,918 to 45,819)   | 566.4  | (362.5 to 1126.4)  |
|        |        |                    |        | 2013 | 71,146  | (40,486 to 96,990)   | 880.2  | (496.4 to 1200.2)  |
|        |        |                    | Both   | 1990 | 50,884  | (39,914 to 70,802)   | 587.1  | (436.2 to 853.1)   |
|        |        |                    |        | 2013 | 139,967 | (103,307 to 173,989) | 872.6  | (649.9 to 1086.2)  |
|        | YLDs   | Ischemic Stroke    | Male   | 1990 | 481     | (305 to 705)         | 15.4   | (9.6 to 22.4)      |
|        |        |                    |        | 2013 | 948     | (581 to 1,381)       | 15.6   | (9.7 to 22.5)      |
|        |        |                    | Female | 1990 | 379     | (234 to 558)         | 11.6   | (7.0 to 17.2)      |
|        |        |                    |        | 2013 | 854     | (538 to 1,242)       | 12.1   | (7.5 to 18.0)      |
|        |        |                    | Both   | 1990 | 861     | (565 to 1,221)       | 13.4   | (8.7 to 18.9)      |
|        |        |                    |        | 2013 | 1,802   | (1,162 to 2,488)     | 13.7   | (8.8 to 18.9)      |
|        |        | Hemorrhagic Stroke | Male   | 1990 | 156     | (98 to 230)          | 4.1    | (2.5 to 6.1)       |
|        |        |                    |        | 2013 | 288     | (177 to 421)         | 3.9    | (2.5 to 5.8)       |
|        |        |                    | Female | 1990 | 111     | (67 to 163)          | 2.9    | (1.8 to 4.3)       |
|        |        |                    |        | 2013 | 225     | (143 to 336)         | 2.8    | (1.7 to 4.2)       |
|        |        |                    | Both   | 1990 | 268     | (176 to 378)         | 3.5    | (2.3 to 5.0)       |
|        |        |                    | Both   | 2013 | 513     | (336 to 727)         | 3.3    | (2.1 to 4.7)       |
| Greece | Deaths | Ischemic Stroke    | Male   | 1990 | 4,786   | (3,867 to 5,623)     | 79.6   | (64.2 to 93.9)     |
|        |        |                    |        | 2013 | 5,211   | (4,067 to 6,534)     | 47.9   | (37.4 to 59.8)     |
|        |        |                    | Female | 1990 | 7,095   | (5,347 to 8,008)     | 87     | (65.5 to 98.2)     |

|         |         |                    |        |      |             |                      |        |                   |
|---------|---------|--------------------|--------|------|-------------|----------------------|--------|-------------------|
|         |         |                    |        | 2013 | 8,456       | (6,772 to 11,754)    | 52.6   | (42.1 to 73.5)    |
|         |         |                    | Both   | 1990 | 11,882      | (9,883 to 13,099)    | 84.1   | (70.0 to 92.7)    |
|         |         |                    |        | 2013 | 13,667      | (11,513 to 17,393)   | 50.9   | (42.8 to 64.9)    |
|         | Deaths  | Hemorrhagic Stroke | Male   | 1990 | 3,095       | (2,456 to 3,886)     | 51.1   | (40.4 to 64.2)    |
|         |         |                    |        | 2013 | 3,615       | (2,534 to 4,766)     | 35.8   | (25.5 to 46.4)    |
|         |         |                    | Female | 1990 | 4,284       | (3,234 to 5,267)     | 54.1   | (40.8 to 66.1)    |
|         |         |                    |        | 2013 | 4,928       | (3,854 to 7,092)     | 33.4   | (26.7 to 47.1)    |
|         |         |                    | Both   | 1990 | 7,379       | (6,192 to 8,708)     | 53.1   | (44.7 to 62.6)    |
|         |         |                    |        | 2013 | 8,543       | (6,997 to 11,029)    | 34.7   | (28.9 to 44.4)    |
|         |         |                    |        |      | Counts, All | Ages                 | Rate   | Per 100,000       |
|         |         |                    |        |      |             |                      | Age-   | standardized      |
| Country | measure | Stroke Type        | sex    | year | Mean        | 95% UI               | Mean   | 95% UI            |
|         | DALYs   | Ischemic Stroke    | Male   | 1990 | 61,359      | (51,739 to 71,585)   | 1001.4 | (844.8 to 1167.8) |
|         |         |                    |        | 2013 | 59,181      | (47,601 to 72,643)   | 589.8  | (478.7 to 721.0)  |
|         |         |                    | Female | 1990 | 75,926      | (58,020 to 84,806)   | 950.7  | (726.0 to 1063.0) |
|         |         |                    |        | 2013 | 76,671      | (62,205 to 104,084)  | 526.8  | (424.8 to 716.9)  |
|         |         |                    | Both   | 1990 | 137,286     | (117,212 to 151,148) | 977.6  | (834.5 to 1074.8) |
|         |         |                    |        | 2013 | 135,853     | (114,006 to 166,832) | 559.1  | (467.5 to 686.1)  |
|         |         | Hemorrhagic Stroke | Male   | 1990 | 50,898      | (42,167 to 61,320)   | 841.2  | (696.6 to 1017.3) |
|         |         |                    |        | 2013 | 49,004      | (37,017 to 60,812)   | 556.4  | (423.4 to 685.7)  |
|         |         |                    | Female | 1990 | 56,215      | (43,542 to 67,136)   | 760    | (593.4 to 901.1)  |
|         |         |                    |        | 2013 | 50,760      | (41,855 to 70,496)   | 423.7  | (355.1 to 582.7)  |
|         |         |                    | Both   | 1990 | 107,114     | (93,235 to 122,859)  | 802.5  | (702.9 to 917.5)  |
|         |         |                    |        | 2013 | 99,765      | (84,874 to           | 488.7  | (418.4 to 591.4)  |

|         |         |                    |        |      |             |                    |       |                 |
|---------|---------|--------------------|--------|------|-------------|--------------------|-------|-----------------|
|         |         |                    |        |      |             | 123,356)           |       |                 |
|         | YLDs    | Ischemic Stroke    | Male   | 1990 | 5,780       | (3,783 to 8,190)   | 93.9  | (61.6 to 132.6) |
|         |         |                    |        | 2013 | 8,333       | (5,352 to 12,088)  | 91.4  | (59.2 to 132.6) |
|         |         |                    | Female | 1990 | 4,417       | (2,948 to 6,159)   | 58.4  | (38.9 to 81.2)  |
|         |         |                    |        | 2013 | 7,027       | (4,436 to 10,115)  | 60    | (38.3 to 85.9)  |
|         |         |                    | Both   | 1990 | 10,197      | (6,924 to 13,769)  | 74.5  | (50.5 to 100.6) |
|         |         |                    |        | 2013 | 15,361      | (10,251 to 21,823) | 74.3  | (50.0 to 104.4) |
|         |         | Hemorrhagic Stroke | Male   | 1990 | 801         | (501 to 1,162)     | 13.3  | (8.3 to 19.1)   |
|         |         |                    |        | 2013 | 1,296       | (763 to 1,920)     | 14.8  | (8.9 to 21.8)   |
|         |         |                    | Female | 1990 | 776         | (488 to 1,145)     | 11.1  | (7.0 to 16.2)   |
|         |         |                    |        | 2013 | 982         | (591 to 1,459)     | 9.6   | (5.8 to 14.1)   |
|         |         |                    | Both   | 1990 | 1,578       | (1,065 to 2,177)   | 12    | (8.1 to 16.6)   |
|         |         |                    | Both   | 2013 | 2,278       | (1,478 to 3,226)   | 11.9  | (7.8 to 16.8)   |
| Grenada | Deaths  | Ischemic Stroke    | Male   | 1990 | 27          | (22 to 32)         | 102.3 | (83.4 to 121.6) |
|         |         |                    |        | 2013 | 29          | (23 to 35)         | 90.2  | (73.4 to 109.9) |
|         |         |                    | Female | 1990 | 43          | (33 to 49)         | 109   | (84.7 to 124.3) |
|         |         |                    |        | 2013 | 41          | (34 to 53)         | 83.4  | (68.3 to 106.8) |
|         |         |                    | Both   | 1990 | 71          | (58 to 79)         | 106.8 | (87.8 to 118.9) |
|         |         |                    |        | 2013 | 71          | (61 to 85)         | 87.1  | (75.4 to 105.0) |
|         | Deaths  | Hemorrhagic Stroke | Male   | 1990 | 14          | (11 to 18)         | 49.4  | (38.3 to 66.1)  |
|         |         |                    |        | 2013 | 16          | (12 to 21)         | 48.4  | (35.0 to 60.9)  |
|         |         |                    | Female | 1990 | 23          | (18 to 29)         | 59.1  | (46.5 to 74.3)  |
|         |         |                    |        | 2013 | 22          | (17 to 31)         | 46.9  | (36.4 to 64.6)  |
|         |         |                    | Both   | 1990 | 37          | (32 to 44)         | 55.3  | (47.5 to 66.5)  |
|         |         |                    |        |      | Counts, All | Ages               | Rate  | Per 100,000     |
|         |         |                    |        |      |             |                    | Age-  | standardized    |
| Country | measure | Stroke Type        | sex    | year | Mean        | 95% UI             | Mean  | 95% UI          |

|           |        |                    |        |      |       |                |        |                    |
|-----------|--------|--------------------|--------|------|-------|----------------|--------|--------------------|
|           |        |                    |        | 2013 | 39    | (31 to 48)     | 48.1   | (39.0 to 59.4)     |
|           | DALYs  | Ischemic Stroke    | Male   | 1990 | 499   | (406 to 588)   | 1660.8 | (1353.5 to 1950.3) |
|           |        |                    |        | 2013 | 505   | (407 to 626)   | 1457.9 | (1175.3 to 1786.0) |
|           |        |                    | Female | 1990 | 673   | (515 to 761)   | 1619.7 | (1248.5 to 1837.6) |
|           |        |                    |        | 2013 | 549   | (447 to 706)   | 1177.6 | (953.6 to 1517.7)  |
|           |        |                    | Both   | 1990 | 1,172 | (967 to 1,305) | 1644.6 | (1367.4 to 1829.3) |
|           |        |                    |        | 2013 | 1,055 | (909 to 1,259) | 1312.7 | (1126.5 to 1565.3) |
|           |        | Hemorrhagic Stroke | Male   | 1990 | 345   | (277 to 436)   | 1069.3 | (856.9 to 1378.0)  |
|           |        |                    |        | 2013 | 398   | (295 to 497)   | 1026.6 | (750.2 to 1283.0)  |
|           |        |                    | Female | 1990 | 474   | (377 to 578)   | 1187.1 | (941.3 to 1432.7)  |
|           |        |                    |        | 2013 | 406   | (319 to 551)   | 896.4  | (704.6 to 1215.3)  |
|           |        |                    | Both   | 1990 | 819   | (709 to 946)   | 1139.2 | (989.7 to 1323.3)  |
|           |        |                    |        | 2013 | 804   | (665 to 961)   | 963    | (795.0 to 1150.1)  |
|           | YLDs   | Ischemic Stroke    | Male   | 1990 | 13    | (9 to 19)      | 48.1   | (32.1 to 66.7)     |
|           |        |                    |        | 2013 | 15    | (10 to 22)     | 45.3   | (29.3 to 64.8)     |
|           |        |                    | Female | 1990 | 12    | (7 to 18)      | 30.9   | (19.8 to 45.4)     |
|           |        |                    |        | 2013 | 14    | (9 to 20)      | 31.3   | (20.2 to 44.0)     |
|           |        |                    | Both   | 1990 | 26    | (18 to 36)     | 38     | (26.3 to 52.3)     |
|           |        |                    |        | 2013 | 30    | (20 to 41)     | 37.4   | (25.1 to 51.8)     |
|           |        | Hemorrhagic Stroke | Male   | 1990 | 4     | (2 to 6)       | 14.5   | (9.0 to 22.2)      |
|           |        |                    |        | 2013 | 5     | (3 to 7)       | 14.4   | (8.9 to 21.0)      |
|           |        |                    | Female | 1990 | 3     | (2 to 6)       | 9.9    | (6.1 to 15.3)      |
|           |        |                    |        | 2013 | 4     | (3 to 7)       | 10.7   | (6.6 to 15.9)      |
|           |        |                    | Both   | 1990 | 8     | (5 to 11)      | 11.9   | (7.7 to 17.0)      |
|           |        |                    | Both   | 2013 | 10    | (6 to 14)      | 12.3   | (7.8 to 17.3)      |
| Guatemala | Deaths | Ischemic Stroke    | Male   | 1990 | 480   | (348 to 593)   | 34.1   | (24.4 to 42.3)     |
|           |        |                    |        | 2013 | 624   | (446 to 892)   | 19.1   | (13.6 to 27.6)     |

|         |         |                    |        |      |             |                    |       |                  |
|---------|---------|--------------------|--------|------|-------------|--------------------|-------|------------------|
|         |         |                    | Female | 1990 | 427         | (323 to 595)       | 29.1  | (22.0 to 40.6)   |
|         |         |                    |        | 2013 | 811         | (588 to 1,124)     | 20.9  | (15.1 to 28.9)   |
|         |         |                    | Both   | 1990 | 907         | (734 to 1,077)     | 31.5  | (25.4 to 37.5)   |
|         |         |                    |        | 2013 | 1,435       | (1,143 to 1,880)   | 20.1  | (16.0 to 26.5)   |
|         | Deaths  | Hemorrhagic Stroke | Male   | 1990 | 416         | (329 to 570)       | 24.7  | (19.0 to 34.6)   |
|         |         |                    |        | 2013 | 835         | (569 to 1,108)     | 24    | (16.1 to 32.0)   |
|         |         |                    | Female | 1990 | 420         | (336 to 711)       | 23.7  | (18.6 to 40.5)   |
|         |         |                    |        | 2013 | 1,184       | (690 to 1,462)     | 28.6  | (16.5 to 35.6)   |
|         |         |                    | Both   | 1990 | 836         | (686 to 1,213)     | 24.2  | (19.4 to 35.4)   |
|         |         |                    |        | 2013 | 2,019       | (1,372 to 2,431)   | 26.5  | (17.8 to 32.2)   |
|         | DALYs   | Ischemic Stroke    | Male   | 1990 | 10,524      | (7,600 to 13,097)  | 541.5 | (392.9 to 668.6) |
|         |         |                    |        | 2013 | 11,255      | (8,273 to 15,506)  | 295.2 | (216.7 to 405.6) |
|         |         |                    |        |      | Counts, All | Ages               | Rate  | Per 100,000      |
|         |         |                    |        |      |             |                    | Age-  | standardized     |
| Country | measure | Stroke Type        | sex    | year | Mean        | 95% UI             | Mean  | 95% UI           |
|         |         |                    | Female | 1990 | 8,853       | (6,678 to 12,651)  | 444.4 | (336.4 to 617.2) |
|         |         |                    |        | 2013 | 13,047      | (9,313 to 17,992)  | 299.7 | (216.5 to 408.8) |
|         |         |                    | Both   | 1990 | 19,377      | (15,507 to 23,221) | 492.2 | (399.6 to 584.6) |
|         |         |                    |        | 2013 | 24,302      | (19,622 to 31,740) | 297.8 | (240.9 to 383.6) |
|         |         | Hemorrhagic Stroke | Male   | 1990 | 12,374      | (10,097 to 16,155) | 511.9 | (413.3 to 687.9) |
|         |         |                    |        | 2013 | 19,796      | (14,490 to 25,029) | 458.1 | (329.4 to 586.8) |
|         |         |                    | Female | 1990 | 12,224      | (9,870 to 20,899)  | 496.5 | (403.5 to 834.9) |
|         |         |                    |        | 2013 | 26,491      | (15,947 to 31,865) | 536.6 | (325.9 to 643.9) |
|         |         |                    | Both   | 1990 | 24,599      | (20,521 to 34,664) | 504   | (417.3 to 718.5) |
|         |         |                    |        | 2013 | 46,287      | (33,504 to 54,466) | 500.6 | (362.1 to 590.1) |
|         | YLDs    | Ischemic Stroke    | Male   | 1990 | 110         | (70 to 160)        | 5.8   | (3.7 to 8.4)     |
|         |         |                    |        | 2013 | 248         | (153 to 368)       | 6.9   | (4.3 to 10.3)    |

|        |        |                    |        |      |        |                    |        |                   |
|--------|--------|--------------------|--------|------|--------|--------------------|--------|-------------------|
|        |        |                    | Female | 1990 | 96     | (64 to 139)        | 5.3    | (3.5 to 7.6)      |
|        |        |                    |        | 2013 | 232    | (137 to 360)       | 5.6    | (3.3 to 8.8)      |
|        |        |                    | Both   | 1990 | 207    | (142 to 283)       | 5.6    | (3.9 to 7.5)      |
|        |        |                    |        | 2013 | 480    | (308 to 698)       | 6.2    | (4.0 to 9.2)      |
|        |        | Hemorrhagic Stroke | Male   | 1990 | 359    | (244 to 503)       | 16.6   | (11.1 to 23.4)    |
|        |        |                    |        | 2013 | 765    | (485 to 1,089)     | 19.6   | (12.5 to 27.9)    |
|        |        |                    | Female | 1990 | 265    | (175 to 378)       | 12.4   | (8.1 to 17.8)     |
|        |        |                    |        | 2013 | 544    | (351 to 762)       | 11.9   | (7.5 to 16.9)     |
|        |        |                    | Both   | 1990 | 624    | (430 to 840)       | 14.5   | (10.0 to 19.5)    |
|        |        |                    | Both   | 2013 | 1,310  | (853 to 1,806)     | 15.5   | (10.2 to 21.4)    |
| Guinea | Deaths | Ischemic Stroke    | Male   | 1990 | 516    | (303 to 704)       | 59.5   | (35.8 to 79.6)    |
|        |        |                    |        | 2013 | 1,772  | (1,017 to 2,401)   | 108.8  | (64.2 to 144.4)   |
|        |        |                    | Female | 1990 | 747    | (285 to 1,118)     | 74.2   | (30.3 to 110.2)   |
|        |        |                    |        | 2013 | 2,058  | (1,120 to 2,850)   | 116    | (66.8 to 159.2)   |
|        |        |                    | Both   | 1990 | 1,263  | (820 to 1,606)     | 67.7   | (44.1 to 86.8)    |
|        |        |                    |        | 2013 | 3,830  | (2,576 to 4,868)   | 113    | (76.6 to 141.3)   |
|        | Deaths | Hemorrhagic Stroke | Male   | 1990 | 599    | (376 to 780)       | 48.7   | (27.6 to 66.7)    |
|        |        |                    |        | 2013 | 1,125  | (721 to 1,702)     | 50.5   | (29.8 to 83.7)    |
|        |        |                    | Female | 1990 | 811    | (406 to 1,140)     | 62.4   | (31.9 to 92.6)    |
|        |        |                    |        | 2013 | 1,304  | (768 to 2,437)     | 56.3   | (32.5 to 114.1)   |
|        |        |                    | Both   | 1990 | 1,411  | (871 to 1,788)     | 56.3   | (33.7 to 73.5)    |
|        |        |                    |        | 2013 | 2,430  | (1,695 to 3,809)   | 53.7   | (35.5 to 91.5)    |
|        | DALYs  | Ischemic Stroke    | Male   | 1990 | 12,185 | (7,485 to 16,896)  | 960.4  | (564.8 to 1309.6) |
|        |        |                    |        | 2013 | 37,773 | (21,476 to 52,834) | 1735.9 | (996.1 to 2361.0) |
|        |        |                    | Female | 1990 | 15,895 | (5,598 to 25,049)  | 1148.7 | (444.3 to 1707.2) |
|        |        |                    |        | 2013 | 39,051 | (20,481 to 55,706) | 1719.6 | (936.6 to 2389.0) |
|        |        |                    | Both   | 1990 | 28,080 | (17,729 to 36,585) | 1065.3 | (692.9 to 1349.2) |

| Country       | measure | Stroke Type        | sex    | year | Counts, All Ages |                     | Rate Per 100,000 Age-standardized |                    |
|---------------|---------|--------------------|--------|------|------------------|---------------------|-----------------------------------|--------------------|
|               |         |                    |        |      | Mean             | 95% UI              | Mean                              | 95% UI             |
|               |         |                    |        | 2013 | 76,824           | (51,005 to 99,731)  | 1732.6                            | (1173.4 to 2202.1) |
|               |         | Hemorrhagic Stroke | Male   | 1990 | 21,835           | (14,079 to 28,361)  | 1080.6                            | (671.5 to 1411.0)  |
|               |         |                    |        | 2013 | 35,716           | (24,413 to 50,494)  | 1107.8                            | (712.4 to 1669.6)  |
|               |         |                    | Female | 1990 | 24,828           | (11,421 to 35,213)  | 1287.7                            | (645.9 to 1804.8)  |
|               |         |                    |        | 2013 | 36,489           | (21,796 to 62,702)  | 1162.4                            | (697.3 to 2132.6)  |
|               |         |                    | Both   | 1990 | 46,663           | (28,276 to 59,373)  | 1194.7                            | (744.1 to 1514.4)  |
|               |         |                    |        | 2013 | 72,205           | (51,926 to 104,757) | 1138.8                            | (799.7 to 1768.5)  |
|               | YLDs    | Ischemic Stroke    | Male   | 1990 | 215              | (127 to 314)        | 15.1                              | (8.9 to 22.1)      |
|               |         |                    |        | 2013 | 414              | (267 to 588)        | 15.5                              | (10.1 to 21.9)     |
|               |         |                    | Female | 1990 | 179              | (112 to 262)        | 11.2                              | (7.0 to 16.1)      |
|               |         |                    |        | 2013 | 337              | (212 to 499)        | 11.4                              | (7.2 to 17.1)      |
|               |         |                    | Both   | 1990 | 394              | (256 to 552)        | 13                                | (8.5 to 18.3)      |
|               |         |                    |        | 2013 | 751              | (507 to 1,042)      | 13.3                              | (9.0 to 18.3)      |
|               |         | Hemorrhagic Stroke | Male   | 1990 | 68               | (40 to 104)         | 4.1                               | (2.5 to 6.3)       |
|               |         |                    |        | 2013 | 124              | (75 to 181)         | 3.9                               | (2.4 to 5.6)       |
|               |         |                    | Female | 1990 | 50               | (31 to 74)          | 2.8                               | (1.7 to 4.2)       |
|               |         |                    |        | 2013 | 92               | (57 to 139)         | 2.7                               | (1.7 to 4.2)       |
|               |         |                    | Both   | 1990 | 119              | (75 to 172)         | 3.4                               | (2.2 to 4.9)       |
|               |         |                    | Both   | 2013 | 217              | (139 to 306)        | 3.3                               | (2.1 to 4.6)       |
| Guinea-Bissau | Deaths  | Ischemic Stroke    | Male   | 1990 | 97               | (52 to 164)         | 66.8                              | (38.7 to 106.6)    |
|               |         |                    |        | 2013 | 335              | (201 to 512)        | 136.4                             | (86.2 to 196.4)    |
|               |         |                    | Female | 1990 | 179              | (102 to 312)        | 104.4                             | (62.5 to 176.4)    |
|               |         |                    |        | 2013 | 412              | (243 to 692)        | 156.3                             | (97.9 to 250.5)    |



|         |         |                    |        |      |                  |                    |        |                    |
|---------|---------|--------------------|--------|------|------------------|--------------------|--------|--------------------|
|         |         |                    | Both   | 1990 | 277              | (174 to 447)       | 88.2   | (58.3 to 133.6)    |
|         |         |                    |        | 2013 | 747              | (487 to 1,111)     | 147.7  | (100.8 to 211.1)   |
|         | Deaths  | Hemorrhagic Stroke | Male   | 1990 | 97               | (44 to 165)        | 49.3   | (20.0 to 83.2)     |
|         |         |                    |        | 2013 | 210              | (112 to 364)       | 60     | (31.3 to 108.5)    |
|         |         |                    | Female | 1990 | 147              | (65 to 249)        | 67.8   | (27.9 to 116.3)    |
|         |         |                    |        | 2013 | 224              | (126 to 459)       | 61.7   | (33.7 to 132.9)    |
|         |         |                    | Both   | 1990 | 244              | (137 to 386)       | 59.6   | (31.1 to 93.0)     |
|         |         |                    |        | 2013 | 434              | (268 to 754)       | 61     | (36.0 to 108.8)    |
|         | DALYs   | Ischemic Stroke    | Male   | 1990 | 2,296            | (1,171 to 3,937)   | 1128.6 | (611.9 to 1887.4)  |
|         |         |                    |        | 2013 | 7,772            | (4,576 to 12,195)  | 2319.7 | (1401.7 to 3500.2) |
|         |         |                    | Female | 1990 | 3,798            | (2,102 to 6,944)   | 1674.9 | (947.0 to 2928.6)  |
|         |         |                    |        | 2013 | 8,631            | (4,879 to 15,982)  | 2478.5 | (1463.2 to 4194.1) |
|         |         |                    | Both   | 1990 | 6,094            | (3,711 to 10,137)  | 1431.8 | (908.9 to 2293.1)  |
|         |         |                    |        | 2013 | 16,403           | (10,355 to 25,243) | 2411.9 | (1583.1 to 3570.8) |
|         |         | Hemorrhagic Stroke | Male   | 1990 | 3,367            | (1,612 to 5,381)   | 1108.6 | (502.1 to 1899.3)  |
|         |         |                    |        |      | Counts, All Ages |                    | Rate   | Per 100,000        |
|         |         |                    |        |      |                  |                    | Age-   | standardized       |
| Country | measure | Stroke Type        | sex    | year | Mean             | 95% UI             | Mean   | 95% UI             |
|         |         |                    |        | 2013 | 7,260            | (3,982 to 11,629)  | 1448.2 | (769.4 to 2518.7)  |
|         |         |                    | Female | 1990 | 4,488            | (2,198 to 7,221)   | 1454   | (656.9 to 2456.2)  |
|         |         |                    |        | 2013 | 7,072            | (4,158 to 13,515)  | 1418.9 | (818.3 to 2849.3)  |
|         |         |                    | Both   | 1990 | 7,856            | (4,636 to 11,863)  | 1295.3 | (723.8 to 2052.4)  |
|         |         |                    |        | 2013 | 14,332           | (9,445 to 23,437)  | 1435.2 | (891.0 to 2476.7)  |
|         | YLDs    | Ischemic Stroke    | Male   | 1990 | 35               | (22 to 52)         | 15.6   | (10.0 to 22.8)     |
|         |         |                    |        | 2013 | 60               | (38 to 87)         | 15.3   | (10.1 to 22.1)     |
|         |         |                    | Female | 1990 | 28               | (18 to 40)         | 11.3   | (7.4 to 15.9)      |
|         |         |                    |        | 2013 | 49               | (30 to 70)         | 11.6   | (7.3 to 16.3)      |

|        |        |                    |        |      |        |                   |        |                    |
|--------|--------|--------------------|--------|------|--------|-------------------|--------|--------------------|
|        |        |                    | Both   | 1990 | 64     | (43 to 88)        | 13.3   | (9.1 to 18.2)      |
|        |        |                    |        | 2013 | 110    | (73 to 151)       | 13.4   | (9.1 to 18.3)      |
|        |        | Hemorrhagic Stroke | Male   | 1990 | 11     | (6 to 16)         | 4.2    | (2.5 to 6.1)       |
|        |        |                    |        | 2013 | 18     | (11 to 27)        | 3.9    | (2.4 to 5.7)       |
|        |        |                    | Female | 1990 | 8      | (5 to 11)         | 2.9    | (1.9 to 4.2)       |
|        |        |                    |        | 2013 | 13     | (8 to 20)         | 2.8    | (1.7 to 4.1)       |
|        |        |                    | Both   | 1990 | 19     | (13 to 27)        | 3.5    | (2.3 to 4.8)       |
|        |        |                    | Both   | 2013 | 32     | (21 to 45)        | 3.3    | (2.2 to 4.7)       |
| Guyana | Deaths | Ischemic Stroke    | Male   | 1990 | 288    | (212 to 340)      | 172    | (127.6 to 202.9)   |
|        |        |                    |        | 2013 | 164    | (118 to 228)      | 147.5  | (112.0 to 190.9)   |
|        |        |                    | Female | 1990 | 281    | (204 to 319)      | 144.6  | (105.7 to 164.0)   |
|        |        |                    |        | 2013 | 231    | (167 to 317)      | 130.5  | (96.7 to 173.7)    |
|        |        |                    | Both   | 1990 | 569    | (441 to 639)      | 157.7  | (122.5 to 177.0)   |
|        |        |                    |        | 2013 | 396    | (314 to 511)      | 138.9  | (112.1 to 172.6)   |
|        | Deaths | Hemorrhagic Stroke | Male   | 1990 | 171    | (136 to 223)      | 94.4   | (74.5 to 125.1)    |
|        |        |                    |        | 2013 | 136    | (92 to 187)       | 84.5   | (55.9 to 112.2)    |
|        |        |                    | Female | 1990 | 179    | (141 to 230)      | 89.1   | (70.3 to 113.8)    |
|        |        |                    |        | 2013 | 162    | (109 to 215)      | 78.1   | (52.2 to 103.9)    |
|        |        |                    | Both   | 1990 | 350    | (301 to 433)      | 91.7   | (78.9 to 113.9)    |
|        |        |                    |        | 2013 | 298    | (222 to 374)      | 81.9   | (59.7 to 101.8)    |
|        | DALYs  | Ischemic Stroke    | Male   | 1990 | 5,565  | (3,951 to 6,565)  | 3082.6 | (2201.4 to 3637.7) |
|        |        |                    |        | 2013 | 4,068  | (2,866 to 5,910)  | 2601.3 | (1920.7 to 3500.9) |
|        |        |                    | Female | 1990 | 4,722  | (3,317 to 5,435)  | 2361.7 | (1671.4 to 2710.3) |
|        |        |                    |        | 2013 | 4,186  | (2,919 to 6,147)  | 2037.8 | (1445.9 to 2894.4) |
|        |        |                    | Both   | 1990 | 10,288 | (7,797 to 11,614) | 2709.3 | (2052.2 to 3061.1) |
|        |        |                    |        | 2013 | 8,255  | (6,355 to 11,090) | 2293.2 | (1817.9 to 2980.4) |
|        |        | Hemorrhagic        | Male   | 1990 | 4,546  | (3,661 to 5,760)  | 2174.4 | (1747.0 to 2790.0) |

|         |         | Stroke             |        |      |                  |                   |                  |                    |
|---------|---------|--------------------|--------|------|------------------|-------------------|------------------|--------------------|
|         |         |                    |        | 2013 | 4,300            | (2,974 to 5,983)  | 1913             | (1310.2 to 2591.6) |
|         |         |                    | Female | 1990 | 4,213            | (3,399 to 5,142)  | 1930.5           | (1533.1 to 2371.0) |
|         |         |                    |        | 2013 | 4,133            | (2,813 to 5,651)  | 1637.6           | (1118.9 to 2205.9) |
|         |         |                    |        |      | Counts, All Ages |                   | Rate Per 100,000 |                    |
| Country | measure | Stroke Type        | sex    | year | Mean             | 95% UI            | Mean             | 95% UI             |
|         |         |                    | Both   | 1990 | 8,760            | (7,637 to 10,401) | 2049.8           | (1773.0 to 2459.3) |
|         |         |                    |        | 2013 | 8,433            | (6,412 to 10,663) | 1773.5           | (1330.8 to 2218.5) |
|         | YLDs    | Ischemic Stroke    | Male   | 1990 | 83               | (53 to 118)       | 47.4             | (29.5 to 67.5)     |
|         |         |                    |        | 2013 | 68               | (43 to 99)        | 48.2             | (31.0 to 68.5)     |
|         |         |                    | Female | 1990 | 65               | (42 to 95)        | 32.7             | (21.4 to 47.4)     |
|         |         |                    |        | 2013 | 67               | (44 to 93)        | 33               | (21.9 to 46.2)     |
|         |         |                    | Both   | 1990 | 149              | (101 to 208)      | 39.6             | (26.8 to 55.3)     |
|         |         |                    |        | 2013 | 136              | (90 to 188)       | 38.6             | (26.1 to 53.0)     |
|         |         | Hemorrhagic Stroke | Male   | 1990 | 29               | (17 to 44)        | 14.8             | (8.7 to 23.2)      |
|         |         |                    |        | 2013 | 27               | (16 to 40)        | 13.9             | (8.2 to 21.1)      |
|         |         |                    | Female | 1990 | 23               | (14 to 38)        | 11               | (6.5 to 17.7)      |
|         |         |                    |        | 2013 | 26               | (15 to 39)        | 10.9             | (6.5 to 16.6)      |
|         |         |                    | Both   | 1990 | 52               | (33 to 78)        | 12.8             | (8.1 to 19.3)      |
|         |         |                    | Both   | 2013 | 53               | (35 to 76)        | 12               | (8.0 to 17.3)      |
| Haiti   | Deaths  | Ischemic Stroke    | Male   | 1990 | 1,337            | (976 to 1,642)    | 102.2            | (75.1 to 123.7)    |
|         |         |                    |        | 2013 | 2,032            | (1,596 to 2,547)  | 99.5             | (78.3 to 126.0)    |
|         |         |                    | Female | 1990 | 2,261            | (1,688 to 2,768)  | 150.9            | (111.7 to 183.5)   |
|         |         |                    |        | 2013 | 3,071            | (2,239 to 4,131)  | 122.8            | (90.7 to 163.3)    |
|         |         |                    | Both   | 1990 | 3,598            | (2,800 to 4,250)  | 128.6            | (101.7 to 150.2)   |
|         |         |                    |        | 2013 | 5,104            | (4,135 to 6,299)  | 112.5            | (92.1 to 138.4)    |
|         | Deaths  | Hemorrhagic        | Male   | 1990 | 1,278            | (1,043 to 1,630)  | 72.1             | (57.4 to 94.1)     |



|          |        |                    |        |      |        |                    |        |                   |
|----------|--------|--------------------|--------|------|--------|--------------------|--------|-------------------|
|          |        |                    | Both   | 1990 | 1,212  | (831 to 1,683)     | 39     | (26.6 to 54.1)    |
|          |        |                    |        | 2013 | 2,004  | (1,353 to 2,777)   | 38.7   | (26.3 to 53.6)    |
|          |        | Hemorrhagic Stroke | Male   | 1990 | 255    | (150 to 405)       | 15     | (8.6 to 24.1)     |
|          |        |                    |        | 2013 | 397    | (243 to 586)       | 14.2   | (8.8 to 21.4)     |
|          |        |                    | Female | 1990 | 182    | (120 to 261)       | 9.8    | (6.3 to 14.6)     |
|          |        |                    |        | 2013 | 321    | (200 to 459)       | 10.2   | (6.3 to 14.9)     |
|          |        |                    | Both   | 1990 | 437    | (285 to 636)       | 12.2   | (8.0 to 18.0)     |
|          |        |                    | Both   | 2013 | 719    | (479 to 1,000)     | 12     | (8.0 to 16.8)     |
| Honduras | Deaths | Ischemic Stroke    | Male   | 1990 | 498    | (386 to 731)       | 63.5   | (49.4 to 93.8)    |
|          |        |                    |        | 2013 | 1,169  | (784 to 1,811)     | 66.6   | (45.1 to 101.8)   |
|          |        |                    | Female | 1990 | 575    | (443 to 729)       | 64.3   | (49.6 to 80.9)    |
|          |        |                    |        | 2013 | 1,360  | (849 to 1,900)     | 65.4   | (40.9 to 91.0)    |
|          |        |                    | Both   | 1990 | 1,073  | (914 to 1,382)     | 64.1   | (54.6 to 81.5)    |
|          |        |                    |        | 2013 | 2,529  | (1,866 to 3,339)   | 66.3   | (49.2 to 87.4)    |
|          | Deaths | Hemorrhagic Stroke | Male   | 1990 | 245    | (173 to 415)       | 22     | (15.2 to 37.3)    |
|          |        |                    |        | 2013 | 466    | (287 to 863)       | 22.5   | (13.8 to 41.1)    |
|          |        |                    | Female | 1990 | 308    | (220 to 407)       | 26.3   | (18.7 to 35.2)    |
|          |        |                    |        | 2013 | 606    | (361 to 965)       | 26.7   | (16.0 to 42.8)    |
|          |        |                    | Both   | 1990 | 554    | (436 to 776)       | 24.3   | (19.1 to 33.7)    |
|          |        |                    |        | 2013 | 1,073  | (743 to 1,607)     | 24.8   | (17.2 to 36.5)    |
|          | DALYs  | Ischemic Stroke    | Male   | 1990 | 11,430 | (8,585 to 17,356)  | 1040.3 | (800.7 to 1520.9) |
|          |        |                    |        | 2013 | 21,067 | (13,681 to 33,784) | 1034.7 | (672.4 to 1617.0) |
|          |        |                    | Female | 1990 | 11,879 | (8,880 to 15,456)  | 999.3  | (769.7 to 1286.1) |
|          |        |                    |        | 2013 | 20,563 | (12,740 to 29,634) | 917.4  | (574.4 to 1314.1) |
|          |        |                    | Both   | 1990 | 23,309 | (19,179 to 31,431) | 1020.4 | (858.2 to 1338.5) |
|          |        |                    |        | 2013 | 41,631 | (30,074 to 57,664) | 976.9  | (708.0 to 1332.0) |
|          |        | Hemorrhagic        | Male   | 1990 | 9,988  | (7,049 to 17,182)  | 573.6  | (404.9 to 965.7)  |

|         |         | Stroke             |        |      |                  |                    |                  |                  |
|---------|---------|--------------------|--------|------|------------------|--------------------|------------------|------------------|
|         |         |                    |        | 2013 | 13,827           | (8,698 to 26,716)  | 522.8            | (327.6 to 961.6) |
|         |         |                    | Female | 1990 | 11,450           | (7,837 to 15,297)  | 678.3            | (480.1 to 889.1) |
|         |         |                    |        | 2013 | 15,570           | (9,283 to 24,743)  | 578.5            | (342.9 to 912.0) |
|         |         |                    | Both   | 1990 | 21,438           | (16,505 to 30,677) | 626.8            | (490.1 to 871.4) |
|         |         |                    |        | 2013 | 29,397           | (19,880 to 45,330) | 552.4            | (378.3 to 836.9) |
|         | YLDs    | Ischemic Stroke    | Male   | 1990 | 69               | (43 to 102)        | 7.4              | (4.6 to 10.9)    |
|         |         |                    |        |      | Counts, All Ages |                    | Rate Per 100,000 |                  |
|         |         |                    |        |      |                  |                    | Age-standardized |                  |
| Country | measure | Stroke Type        | sex    | year | Mean             | 95% UI             | Mean             | 95% UI           |
|         |         |                    |        | 2013 | 161              | (102 to 234)       | 8                | (5.1 to 11.5)    |
|         |         |                    | Female | 1990 | 58               | (36 to 84)         | 5.9              | (3.6 to 8.7)     |
|         |         |                    |        | 2013 | 147              | (85 to 218)        | 6.7              | (3.9 to 10.0)    |
|         |         |                    | Both   | 1990 | 128              | (83 to 183)        | 6.6              | (4.3 to 9.4)     |
|         |         |                    |        | 2013 | 308              | (201 to 424)       | 7.4              | (4.8 to 10.1)    |
|         |         | Hemorrhagic Stroke | Male   | 1990 | 207              | (136 to 293)       | 19.1             | (12.5 to 27.6)   |
|         |         |                    |        | 2013 | 457              | (299 to 636)       | 20.1             | (13.0 to 27.8)   |
|         |         |                    | Female | 1990 | 142              | (91 to 205)        | 12.6             | (8.0 to 18.3)    |
|         |         |                    |        | 2013 | 302              | (196 to 430)       | 12.3             | (8.1 to 17.8)    |
|         |         |                    | Both   | 1990 | 350              | (232 to 475)       | 15.7             | (10.4 to 21.7)   |
|         |         |                    | Both   | 2013 | 759              | (514 to 1,035)     | 16.1             | (10.9 to 21.7)   |
| Hungary | Deaths  | Ischemic Stroke    | Male   | 1990 | 7,053            | (5,977 to 8,279)   | 145.4            | (123.3 to 171.2) |
|         |         |                    |        | 2013 | 5,938            | (4,829 to 7,119)   | 96.4             | (78.5 to 115.6)  |
|         |         |                    | Female | 1990 | 9,189            | (7,506 to 10,820)  | 109.5            | (89.2 to 129.0)  |
|         |         |                    |        | 2013 | 7,870            | (6,314 to 10,727)  | 62.8             | (50.2 to 85.2)   |
|         |         |                    | Both   | 1990 | 16,242           | (14,649 to 18,411) | 124              | (111.5 to 140.8) |
|         |         |                    |        | 2013 | 13,809           | (11,818 to 16,752) | 75.5             | (64.5 to 91.3)   |
|         | Deaths  | Hemorrhagic        | Male   | 1990 | 3,186            | (2,333 to 3,894)   | 61               | (44.1 to 74.4)   |

| Country | measure | Stroke Type        | sex    | year | Mean        | 95% UI               | Rate<br>Age-<br>standardized<br>Mean | Per 100,000<br>standardized<br>95% UI |
|---------|---------|--------------------|--------|------|-------------|----------------------|--------------------------------------|---------------------------------------|
|         |         | Stroke             |        | 2013 | 2,030       | (1,522 to 2,925)     | 32.3                                 | (24.2 to 46.7)                        |
|         |         |                    | Female | 1990 | 3,936       | (2,475 to 4,530)     | 49.1                                 | (31.3 to 56.2)                        |
|         |         |                    |        | 2013 | 2,113       | (1,452 to 3,952)     | 19.6                                 | (13.9 to 36.1)                        |
|         |         |                    | Both   | 1990 | 7,123       | (5,324 to 8,134)     | 54.5                                 | (40.6 to 62.3)                        |
|         |         |                    |        | 2013 | 4,143       | (3,129 to 6,251)     | 24.9                                 | (19.1 to 37.0)                        |
|         | DALYs   | Ischemic Stroke    | Male   | 1990 | 114,967     | (97,691 to 135,970)  | 2186.7                               | (1852.3 to 2578.7)                    |
|         |         |                    |        | 2013 | 83,968      | (67,556 to 100,490)  | 1331.3                               | (1077.7 to 1591.5)                    |
|         |         |                    | Female | 1990 | 115,682     | (93,363 to 133,764)  | 1413.1                               | (1137.4 to 1643.9)                    |
|         |         |                    |        | 2013 | 78,970      | (63,215 to 107,424)  | 705.9                                | (561.7 to 962.1)                      |
|         |         |                    | Both   | 1990 | 230,650     | (205,632 to 261,246) | 1737.4                               | (1551.3 to 1970.9)                    |
|         |         |                    |        | 2013 | 162,938     | (139,151 to 195,136) | 958.5                                | (815.7 to 1142.2)                     |
|         |         | Hemorrhagic Stroke | Male   | 1990 | 71,946      | (54,734 to 87,579)   | 1298.7                               | (982.0 to 1578.3)                     |
|         |         |                    |        | 2013 | 42,348      | (33,055 to 57,071)   | 671.6                                | (525.4 to 902.1)                      |
|         |         |                    | Female | 1990 | 68,690      | (45,945 to 76,925)   | 923.5                                | (629.0 to 1027.6)                     |
|         |         |                    |        | 2013 | 31,659      | (23,660 to 56,253)   | 357.6                                | (275.1 to 612.4)                      |
|         |         |                    | Both   | 1990 | 140,637     | (110,916 to 159,718) | 1093.9                               | (868.1 to 1243.2)                     |
|         |         |                    |        |      | Counts, All | Ages                 | Rate                                 | Per 100,000                           |
|         |         |                    |        |      |             |                      | Age-                                 | standardized                          |
|         |         |                    |        |      |             |                      | Mean                                 | 95% UI                                |
|         |         |                    |        | 2013 | 74,008      | (59,357 to 101,744)  | 496.4                                | (404.4 to 664.7)                      |
|         | YLDs    | Ischemic Stroke    | Male   | 1990 | 1,406       | (890 to 1,972)       | 25.5                                 | (16.3 to 35.8)                        |

|         |        |                    |        |      |       |                  |       |                  |
|---------|--------|--------------------|--------|------|-------|------------------|-------|------------------|
|         |        |                    |        | 2013 | 1,730 | (1,140 to 2,440) | 27.5  | (18.2 to 38.7)   |
|         |        |                    | Female | 1990 | 1,377 | (867 to 1,957)   | 18.4  | (11.7 to 26.2)   |
|         |        |                    |        | 2013 | 1,504 | (973 to 2,146)   | 16.8  | (10.9 to 23.7)   |
|         |        |                    | Both   | 1990 | 2,784 | (1,836 to 3,752) | 21.6  | (14.2 to 29.1)   |
|         |        |                    |        | 2013 | 3,235 | (2,215 to 4,478) | 21.5  | (14.7 to 29.7)   |
|         |        | Hemorrhagic Stroke | Male   | 1990 | 296   | (173 to 435)     | 5.4   | (3.2 to 7.9)     |
|         |        |                    |        | 2013 | 368   | (220 to 569)     | 6.1   | (3.6 to 9.2)     |
|         |        |                    | Female | 1990 | 297   | (183 to 446)     | 4.3   | (2.7 to 6.3)     |
|         |        |                    |        | 2013 | 352   | (210 to 532)     | 4.5   | (2.7 to 6.7)     |
|         |        |                    | Both   | 1990 | 594   | (387 to 841)     | 4.8   | (3.2 to 6.8)     |
|         |        |                    | Both   | 2013 | 720   | (454 to 1,037)   | 5.2   | (3.3 to 7.4)     |
| Iceland | Deaths | Ischemic Stroke    | Male   | 1990 | 44    | (35 to 57)       | 38.5  | (30.5 to 50.0)   |
|         |        |                    |        | 2013 | 47    | (33 to 62)       | 23.1  | (16.2 to 30.2)   |
|         |        |                    | Female | 1990 | 56    | (45 to 73)       | 34.2  | (27.0 to 44.0)   |
|         |        |                    |        | 2013 | 58    | (42 to 76)       | 19.7  | (14.3 to 25.5)   |
|         |        |                    | Both   | 1990 | 101   | (87 to 122)      | 36.3  | (31.4 to 43.7)   |
|         |        |                    |        | 2013 | 105   | (82 to 126)      | 21.4  | (16.7 to 25.7)   |
|         | Deaths | Hemorrhagic Stroke | Male   | 1990 | 29    | (22 to 39)       | 25.5  | (19.2 to 34.1)   |
|         |        |                    |        | 2013 | 32    | (21 to 43)       | 16    | (10.7 to 21.2)   |
|         |        |                    | Female | 1990 | 42    | (31 to 56)       | 27.7  | (20.4 to 35.9)   |
|         |        |                    |        | 2013 | 37    | (27 to 52)       | 13.9  | (10.1 to 19.2)   |
|         |        |                    | Both   | 1990 | 72    | (59 to 89)       | 26.7  | (22.1 to 32.9)   |
|         |        |                    |        | 2013 | 69    | (52 to 87)       | 14.9  | (11.5 to 18.6)   |
|         | DALYs  | Ischemic Stroke    | Male   | 1990 | 632   | (522 to 778)     | 538.5 | (445.0 to 663.7) |
|         |        |                    |        | 2013 | 650   | (493 to 823)     | 331.2 | (252.8 to 418.2) |
|         |        |                    | Female | 1990 | 617   | (506 to 745)     | 402   | (331.3 to 487.3) |
|         |        |                    |        | 2013 | 551   | (424 to 682)     | 219.6 | (169.3 to 269.5) |



|         |         |                    | Both   | 1990 | 1,249       | (1,095 to 1,451)     | 465.9 | (408.8 to 540.7) |
|---------|---------|--------------------|--------|------|-------------|----------------------|-------|------------------|
|         |         |                    |        | 2013 | 1,202       | (978 to 1,428)       | 273   | (221.3 to 325.0) |
|         |         | Hemorrhagic Stroke | Male   | 1990 | 516         | (411 to 653)         | 429.3 | (340.3 to 544.0) |
|         |         |                    |        | 2013 | 467         | (321 to 605)         | 242.9 | (166.9 to 313.9) |
|         |         |                    | Female | 1990 | 625         | (481 to 780)         | 452.8 | (348.3 to 563.3) |
|         |         |                    |        | 2013 | 422         | (318 to 549)         | 189.1 | (143.5 to 244.5) |
|         |         |                    | Both   | 1990 | 1,142       | (974 to 1,347)       | 441   | (376.5 to 518.2) |
|         |         |                    |        | 2013 | 889         | (704 to 1,073)       | 214.7 | (170.1 to 258.1) |
|         | YLDs    | Ischemic Stroke    | Male   | 1990 | 101         | (65 to 144)          | 85.6  | (54.8 to 121.9)  |
|         |         |                    |        |      | Counts, All | Ages                 | Rate  | Per 100,000      |
|         |         |                    |        |      |             |                      | Age-  | standardized     |
| Country | measure | Stroke Type        | sex    | year | Mean        | 95% UI               | Mean  | 95% UI           |
|         |         |                    |        | 2013 | 170         | (111 to 241)         | 88    | (57.7 to 124.4)  |
|         |         |                    | Female | 1990 | 93          | (60 to 130)          | 66.6  | (43.3 to 92.1)   |
|         |         |                    |        | 2013 | 131         | (84 to 194)          | 60.1  | (38.7 to 88.8)   |
|         |         |                    | Both   | 1990 | 195         | (134 to 264)         | 75.3  | (51.5 to 102.4)  |
|         |         |                    |        | 2013 | 302         | (203 to 412)         | 73.4  | (49.5 to 99.8)   |
|         |         | Hemorrhagic Stroke | Male   | 1990 | 19          | (10 to 29)           | 15.9  | (8.9 to 24.3)    |
|         |         |                    |        | 2013 | 34          | (21 to 52)           | 18.4  | (11.4 to 27.2)   |
|         |         |                    | Female | 1990 | 15          | (9 to 22)            | 11.1  | (6.9 to 16.5)    |
|         |         |                    |        | 2013 | 23          | (14 to 35)           | 11.3  | (7.0 to 17.3)    |
|         |         |                    | Both   | 1990 | 34          | (22 to 49)           | 13.3  | (8.6 to 19.2)    |
|         |         |                    | Both   | 2013 | 58          | (38 to 84)           | 14.6  | (9.6 to 21.1)    |
| India   | Deaths  | Ischemic Stroke    | Male   | 1990 | 89,777      | (57,503 to 120,555)  | 55    | (35.2 to 72.8)   |
|         |         |                    |        | 2013 | 167,039     | (113,526 to 225,568) | 56.4  | (39.0 to 75.1)   |
|         |         |                    | Female | 1990 | 89,957      | (53,931 to           | 57.9  | (35.5 to 77.4)   |

|         |         |                    |        |      |             |                          |       |                   |
|---------|---------|--------------------|--------|------|-------------|--------------------------|-------|-------------------|
|         |         |                    |        |      |             | 125,476)                 |       |                   |
|         |         |                    |        | 2013 | 165,730     | (104,964 to 221,959)     | 51    | (32.6 to 67.8)    |
|         |         |                    | Both   | 1990 | 179,734     | (131,089 to 223,609)     | 56.6  | (41.6 to 69.6)    |
|         |         |                    |        | 2013 | 332,769     | (249,102 to 409,620)     | 53.7  | (40.2 to 65.2)    |
|         | Deaths  | Hemorrhagic Stroke | Male   | 1990 | 115,363     | (82,615 to 155,523)      | 54.4  | (36.8 to 78.0)    |
|         |         |                    |        | 2013 | 198,257     | (141,893 to 289,499)     | 53.4  | (37.9 to 79.2)    |
|         |         |                    | Female | 1990 | 118,482     | (73,812 to 155,048)      | 58.9  | (36.4 to 79.8)    |
|         |         |                    |        | 2013 | 183,187     | (119,426 to 253,800)     | 48.1  | (31.3 to 67.6)    |
|         |         |                    | Both   | 1990 | 233,845     | (179,841 to 289,583)     | 56.7  | (42.9 to 72.1)    |
|         |         |                    |        | 2013 | 381,445     | (294,382 to 487,330)     | 50.8  | (39.1 to 65.7)    |
|         | DALYs   | Ischemic Stroke    | Male   | 1990 | 1,887,041   | (1,190,035 to 2,592,045) | 903.5 | (583.2 to 1205.7) |
|         |         |                    |        | 2013 | 3,217,138   | (2,167,198 to 4,437,095) | 880.8 | (599.7 to 1187.7) |
|         |         |                    | Female | 1990 | 1,716,614   | (981,536 to 2,655,931)   | 870.6 | (524.9 to 1237.9) |
|         |         |                    |        | 2013 | 2,680,670   | (1,700,216 to 3,640,302) | 708.8 | (454.8 to 945.2)  |
|         |         |                    | Both   | 1990 | 3,603,655   | (2,639,063 to 4,599,668) | 888.5 | (649.3 to 1106.7) |
|         |         |                    |        |      | Counts, All | Ages                     | Rate  | Per 100,000       |
|         |         |                    |        |      |             |                          | Age-  | standardized      |
| Country | measure | Stroke Type        | sex    | year | Mean        | 95% UI                   | Mean  | 95% UI            |

|  |      |                    |        |      |           |                           |        |                   |
|--|------|--------------------|--------|------|-----------|---------------------------|--------|-------------------|
|  |      |                    |        | 2013 | 5,897,809 | (4,426,760 to 7,399,023)  | 793.4  | (600.3 to 981.6)  |
|  |      | Hemorrhagic Stroke | Male   | 1990 | 3,416,647 | (2,576,937 to 4,466,161)  | 1225.5 | (891.0 to 1623.8) |
|  |      |                    |        | 2013 | 5,305,921 | (3,867,429 to 7,568,556)  | 1142.5 | (827.3 to 1658.2) |
|  |      |                    | Female | 1990 | 3,310,584 | (2,146,906 to 4,242,407)  | 1259.2 | (794.9 to 1626.8) |
|  |      |                    |        | 2013 | 4,200,156 | (2,738,256 to 5,734,171)  | 930.3  | (608.7 to 1269.2) |
|  |      |                    | Both   | 1990 | 6,727,232 | (5,311,589 to 8,072,971)  | 1243   | (961.2 to 1525.7) |
|  |      |                    |        | 2013 | 9,506,078 | (7,431,973 to 12,042,460) | 1038   | (809.3 to 1319.0) |
|  | YLDs | Ischemic Stroke    | Male   | 1990 | 70,213    | (47,030 to 97,677)        | 27.8   | (18.7 to 38.4)    |
|  |      |                    |        | 2013 | 126,656   | (80,386 to 176,987)       | 28.2   | (17.9 to 39.5)    |
|  |      |                    | Female | 1990 | 57,816    | (38,130 to 80,842)        | 23.4   | (15.4 to 32.8)    |
|  |      |                    |        | 2013 | 111,072   | (68,805 to 157,682)       | 24.1   | (15.1 to 34.2)    |
|  |      |                    | Both   | 1990 | 128,029   | (88,055 to 173,850)       | 25.6   | (17.8 to 34.7)    |
|  |      |                    |        | 2013 | 237,729   | (158,111 to 323,368)      | 26.1   | (17.3 to 35.3)    |
|  |      | Hemorrhagic Stroke | Male   | 1990 | 39,810    | (25,980 to 55,947)        | 14.5   | (9.4 to 20.4)     |
|  |      |                    |        | 2013 | 71,803    | (46,557 to 101,671)       | 15.1   | (9.8 to 21.2)     |
|  |      |                    | Female | 1990 | 29,115    | (18,813 to 40,699)        | 10.9   | (7.0 to 15.2)     |
|  |      |                    |        | 2013 | 55,638    | (34,843 to 81,003)        | 11.5   | (7.3 to 16.7)     |
|  |      |                    | Both   | 1990 | 68,925    | (46,280 to 94,513)        | 12.7   | (8.6 to 17.5)     |

|           |         |                    |        |      |                  |                        |        |                    |
|-----------|---------|--------------------|--------|------|------------------|------------------------|--------|--------------------|
|           |         |                    | Both   | 2013 | 127,442          | (83,822 to 177,996)    | 13.3   | (8.8 to 18.3)      |
| Indonesia | Deaths  | Ischemic Stroke    | Male   | 1990 | 28,053           | (19,459 to 37,159)     | 101    | (71.1 to 131.0)    |
|           |         |                    |        | 2013 | 68,619           | (53,251 to 83,285)     | 125.3  | (97.3 to 150.6)    |
|           |         |                    | Female | 1990 | 29,351           | (22,506 to 36,438)     | 88.5   | (66.4 to 109.2)    |
|           |         |                    |        | 2013 | 84,222           | (60,366 to 99,862)     | 127.1  | (91.1 to 150.3)    |
|           |         |                    | Both   | 1990 | 57,404           | (47,052 to 69,454)     | 94.2   | (76.8 to 113.2)    |
|           |         |                    |        | 2013 | 152,841          | (123,946 to 174,085)   | 127    | (102.3 to 144.6)   |
|           | Deaths  | Hemorrhagic Stroke | Male   | 1990 | 34,417           | (24,458 to 43,843)     | 93.2   | (62.6 to 122.1)    |
|           |         |                    |        | 2013 | 65,441           | (50,479 to 83,627)     | 88.8   | (67.7 to 117.4)    |
|           |         |                    | Female | 1990 | 36,731           | (29,443 to 47,173)     | 88.5   | (67.0 to 113.0)    |
|           |         |                    |        | 2013 | 71,634           | (55,254 to 93,242)     | 89.6   | (68.7 to 119.3)    |
|           |         |                    |        |      | Counts, All Ages |                        | Rate   | Per 100,000        |
|           |         |                    |        |      |                  |                        | Age-   | standardized       |
| Country   | measure | Stroke Type        | sex    | year | Mean             | 95% UI                 | Mean   | 95% UI             |
|           |         |                    | Both   | 1990 | 71,148           | (57,760 to 85,225)     | 90.7   | (70.7 to 109.9)    |
|           |         |                    |        | 2013 | 137,075          | (115,276 to 165,434)   | 89.7   | (74.5 to 110.9)    |
|           | DALYs   | Ischemic Stroke    | Male   | 1990 | 539,362          | (366,977 to 738,598)   | 1495.4 | (1039.8 to 1983.7) |
|           |         |                    |        | 2013 | 1,251,249        | (941,738 to 1,582,713) | 1829.1 | (1408.6 to 2234.4) |
|           |         |                    | Female | 1990 | 505,700          | (399,365 to 652,093)   | 1233.2 | (976.1 to 1550.2)  |
|           |         |                    |        | 2013 | 1,279,217        | (914,035 to 1,549,819) | 1678.9 | (1203.1 to 2011.2) |
|           |         |                    | Both   | 1990 | 1,045,062        | (849,322 to 1,292,804) | 1353.6 | (1112.2 to 1643.5) |
|           |         |                    |        | 2013 | 2,530,467        | (2,061,858 to          | 1756.8 | (1419.3 to 2002.6) |

|      |        |                    |        |      |           |                          |        |                    |
|------|--------|--------------------|--------|------|-----------|--------------------------|--------|--------------------|
|      |        |                    |        |      |           | 2,900,622)               |        |                    |
|      |        | Hemorrhagic Stroke | Male   | 1990 | 960,012   | (715,370 to 1,193,385)   | 1948.5 | (1398.8 to 2454.9) |
|      |        |                    |        | 2013 | 1,807,866 | (1,387,482 to 2,244,083) | 1935.4 | (1504.2 to 2429.1) |
|      |        |                    | Female | 1990 | 924,099   | (772,339 to 1,208,573)   | 1775.8 | (1464.7 to 2287.9) |
|      |        |                    |        | 2013 | 1,694,594 | (1,316,679 to 2,137,775) | 1779.6 | (1386.6 to 2275.9) |
|      |        |                    | Both   | 1990 | 1,884,112 | (1,594,844 to 2,234,051) | 1858.5 | (1541.4 to 2204.4) |
|      |        |                    |        | 2013 | 3,502,461 | (2,947,099 to 4,107,028) | 1860.8 | (1568.1 to 2221.4) |
|      | YLDs   | Ischemic Stroke    | Male   | 1990 | 10,730    | (7,120 to 15,061)        | 28.2   | (18.7 to 39.5)     |
|      |        |                    |        | 2013 | 20,430    | (12,300 to 30,428)       | 28.2   | (16.8 to 42.6)     |
|      |        |                    | Female | 1990 | 9,788     | (6,196 to 14,463)        | 22.5   | (13.9 to 33.7)     |
|      |        |                    |        | 2013 | 20,013    | (13,135 to 28,110)       | 24.6   | (15.7 to 34.7)     |
|      |        |                    | Both   | 1990 | 20,519    | (13,670 to 28,171)       | 25.1   | (16.7 to 34.8)     |
|      |        |                    |        | 2013 | 40,443    | (26,972 to 55,704)       | 26.3   | (17.2 to 36.3)     |
|      |        | Hemorrhagic Stroke | Male   | 1990 | 13,335    | (8,682 to 18,372)        | 30.9   | (20.2 to 42.5)     |
|      |        |                    |        | 2013 | 24,736    | (15,668 to 35,572)       | 30.5   | (19.1 to 44.2)     |
|      |        |                    | Female | 1990 | 10,656    | (6,791 to 15,155)        | 22.3   | (14.1 to 32.5)     |
|      |        |                    |        | 2013 | 20,194    | (13,254 to 28,600)       | 23.1   | (15.0 to 32.9)     |
|      |        |                    | Both   | 1990 | 23,991    | (16,257 to 32,426)       | 26.3   | (17.7 to 35.8)     |
|      |        |                    | Both   | 2013 | 44,931    | (29,796 to 61,998)       | 26.6   | (17.6 to 36.7)     |
| Iran | Deaths | Ischemic Stroke    | Male   | 1990 | 6,621     | (5,006 to 8,817)         | 80.9   | (63.1 to 105.0)    |
|      |        |                    |        | 2013 | 7,479     | (3,869 to 10,185)        | 37.4   | (19.6 to 50.8)     |
|      |        |                    | Female | 1990 | 4,808     | (3,855 to 6,038)         | 67.8   | (54.1 to 84.4)     |
|      |        |                    |        | 2013 | 8,914     | (5,299 to 11,122)        | 47     | (28.0 to 58.4)     |

| Country | measure | Stroke Type        | sex    | year | Mean             | 95% UI               | Mean                              | 95% UI            |
|---------|---------|--------------------|--------|------|------------------|----------------------|-----------------------------------|-------------------|
|         |         |                    | Both   | 1990 | 11,429           | (9,510 to 13,843)    | 74.6                              | (63.7 to 88.4)    |
|         |         |                    |        |      | Counts, All Ages |                      | Rate Per 100,000 Age-standardized |                   |
|         |         |                    |        | 2013 | 16,394           | (10,036 to 19,890)   | 42                                | (25.7 to 50.9)    |
|         | Deaths  | Hemorrhagic Stroke | Male   | 1990 | 6,721            | (4,941 to 8,725)     | 61.6                              | (43.7 to 80.2)    |
|         |         |                    |        | 2013 | 5,745            | (3,647 to 9,275)     | 26                                | (15.9 to 43.3)    |
|         |         |                    | Female | 1990 | 5,402            | (4,053 to 6,582)     | 54.6                              | (41.2 to 69.3)    |
|         |         |                    |        | 2013 | 6,311            | (3,343 to 8,180)     | 30                                | (15.8 to 39.0)    |
|         |         |                    | Both   | 1990 | 12,123           | (10,036 to 14,408)   | 58.2                              | (47.7 to 70.2)    |
|         |         |                    |        | 2013 | 12,057           | (8,700 to 15,439)    | 27.9                              | (20.0 to 36.5)    |
|         | DALYs   | Ischemic Stroke    | Male   | 1990 | 131,239          | (95,006 to 185,023)  | 1177.1                            | (890.7 to 1575.3) |
|         |         |                    |        | 2013 | 105,692          | (52,722 to 149,102)  | 465.4                             | (239.6 to 650.7)  |
|         |         |                    | Female | 1990 | 90,575           | (67,103 to 125,490)  | 884.4                             | (710.7 to 1124.7) |
|         |         |                    |        | 2013 | 111,328          | (64,346 to 142,182)  | 506.6                             | (303.1 to 639.7)  |
|         |         |                    | Both   | 1990 | 221,815          | (175,013 to 281,609) | 1035.5                            | (858.7 to 1262.7) |
|         |         |                    |        | 2013 | 217,021          | (127,286 to 269,256) | 484.8                             | (290.9 to 592.3)  |
|         |         | Hemorrhagic Stroke | Male   | 1990 | 207,657          | (157,002 to 273,236) | 1248.9                            | (918.6 to 1627.1) |
|         |         |                    |        | 2013 | 115,921          | (74,834 to 169,769)  | 430.9                             | (275.2 to 660.4)  |
|         |         |                    | Female | 1990 | 177,222          | (124,423 to 215,446) | 1032                              | (779.6 to 1269.8) |
|         |         |                    |        | 2013 | 113,264          | (65,498 to           | 432.3                             | (242.8 to 555.2)  |

|         |         |                    |        |      |             |                      |        |                   |
|---------|---------|--------------------|--------|------|-------------|----------------------|--------|-------------------|
|         |         |                    |        |      |             | 146,914)             |        |                   |
|         |         |                    | Both   | 1990 | 384,879     | (316,529 to 455,210) | 1143.3 | (940.3 to 1358.4) |
|         |         |                    |        | 2013 | 229,185     | (172,356 to 282,547) | 431    | (319.2 to 536.8)  |
|         | YLDs    | Ischemic Stroke    | Male   | 1990 | 1,239       | (745 to 1,807)       | 8.6    | (5.1 to 12.7)     |
|         |         |                    |        | 2013 | 3,515       | (2,317 to 4,907)     | 12.6   | (8.5 to 17.5)     |
|         |         |                    | Female | 1990 | 930         | (596 to 1,355)       | 6.9    | (4.4 to 10.1)     |
|         |         |                    |        | 2013 | 2,793       | (1,842 to 3,873)     | 9.9    | (6.7 to 13.7)     |
|         |         |                    | Both   | 1990 | 2,169       | (1,435 to 3,065)     | 7.8    | (5.2 to 11.0)     |
|         |         |                    |        | 2013 | 6,309       | (4,313 to 8,643)     | 11.3   | (7.9 to 15.4)     |
|         |         | Hemorrhagic Stroke | Male   | 1990 | 268         | (167 to 402)         | 1.6    | (1.0 to 2.4)      |
|         |         |                    |        | 2013 | 649         | (415 to 945)         | 2.1    | (1.4 to 3.1)      |
|         |         |                    | Female | 1990 | 319         | (201 to 456)         | 2      | (1.3 to 2.9)      |
|         |         |                    |        | 2013 | 823         | (537 to 1,182)       | 2.6    | (1.7 to 3.7)      |
|         |         |                    | Both   | 1990 | 587         | (384 to 834)         | 1.8    | (1.2 to 2.6)      |
|         |         |                    | Both   | 2013 | 1,473       | (980 to 2,059)       | 2.4    | (1.6 to 3.3)      |
|         |         |                    |        |      | Counts, All | Ages                 | Rate   | Per 100,000       |
|         |         |                    |        |      |             |                      | Age-   | standardized      |
| Country | measure | Stroke Type        | sex    | year | Mean        | 95% UI               | Mean   | 95% UI            |
| Iraq    | Deaths  | Ischemic Stroke    | Male   | 1990 | 2,870       | (2,108 to 3,763)     | 101.8  | (75.8 to 130.5)   |
|         |         |                    |        | 2013 | 4,098       | (2,841 to 5,685)     | 90.6   | (64.0 to 123.1)   |
|         |         |                    | Female | 1990 | 3,479       | (2,608 to 4,504)     | 104.6  | (78.8 to 132.9)   |
|         |         |                    |        | 2013 | 5,888       | (4,207 to 7,493)     | 100.1  | (71.9 to 126.5)   |
|         |         |                    | Both   | 1990 | 6,350       | (5,252 to 7,640)     | 103.5  | (86.1 to 123.0)   |
|         |         |                    |        | 2013 | 9,987       | (7,732 to 12,064)    | 96.5   | (75.9 to 115.7)   |
|         | Deaths  | Hemorrhagic Stroke | Male   | 1990 | 1,994       | (1,436 to 2,647)     | 53.3   | (36.4 to 73.8)    |
|         |         |                    |        | 2013 | 2,993       | (2,042 to 4,380)     | 49.2   | (32.7 to 72.4)    |

|  |       |                    |        |      |         |                      |        |                    |
|--|-------|--------------------|--------|------|---------|----------------------|--------|--------------------|
|  |       |                    | Female | 1990 | 2,495   | (1,785 to 3,461)     | 65.7   | (46.6 to 90.4)     |
|  |       |                    |        | 2013 | 4,417   | (3,121 to 6,190)     | 63.7   | (45.5 to 88.1)     |
|  |       |                    | Both   | 1990 | 4,489   | (3,549 to 5,665)     | 60.1   | (46.3 to 76.6)     |
|  |       |                    |        | 2013 | 7,411   | (5,739 to 9,413)     | 57.6   | (45.0 to 72.9)     |
|  | DALYs | Ischemic Stroke    | Male   | 1990 | 50,293  | (35,675 to 68,658)   | 1489.1 | (1080.4 to 1973.1) |
|  |       |                    |        | 2013 | 76,335  | (51,518 to 109,237)  | 1324.7 | (915.3 to 1854.6)  |
|  |       |                    | Female | 1990 | 56,122  | (41,239 to 75,808)   | 1474.3 | (1092.2 to 1955.2) |
|  |       |                    |        | 2013 | 94,128  | (65,991 to 123,406)  | 1386.3 | (980.6 to 1805.5)  |
|  |       |                    | Both   | 1990 | 106,415 | (85,144 to 130,888)  | 1483.1 | (1198.4 to 1811.6) |
|  |       |                    |        | 2013 | 170,463 | (128,978 to 210,749) | 1365.1 | (1045.8 to 1667.6) |
|  |       | Hemorrhagic Stroke | Male   | 1990 | 67,907  | (48,864 to 89,282)   | 1164.8 | (817.3 to 1584.7)  |
|  |       |                    |        | 2013 | 92,226  | (64,074 to 131,411)  | 1017.3 | (685.7 to 1510.0)  |
|  |       |                    | Female | 1990 | 64,050  | (46,069 to 92,515)   | 1339.8 | (954.2 to 1876.4)  |
|  |       |                    |        | 2013 | 108,314 | (74,806 to 158,285)  | 1237.8 | (850.4 to 1772.7)  |
|  |       |                    | Both   | 1990 | 131,957 | (104,669 to 166,397) | 1259   | (986.3 to 1598.8)  |
|  |       |                    |        | 2013 | 200,541 | (154,883 to 254,940) | 1140.6 | (870.9 to 1461.6)  |
|  | YLDs  | Ischemic Stroke    | Male   | 1990 | 370     | (232 to 543)         | 9.2    | (5.8 to 13.4)      |
|  |       |                    |        | 2013 | 719     | (479 to 1,030)       | 9.2    | (6.2 to 13.0)      |
|  |       |                    | Female | 1990 | 301     | (191 to 421)         | 7.1    | (4.5 to 10.0)      |
|  |       |                    |        | 2013 | 610     | (396 to 861)         | 7.1    | (4.7 to 9.9)       |
|  |       |                    | Both   | 1990 | 672     | (439 to 942)         | 8.1    | (5.4 to 11.3)      |



|                  |         |                    |        |      |        |                    |                              |                             |
|------------------|---------|--------------------|--------|------|--------|--------------------|------------------------------|-----------------------------|
|                  |         |                    |        | 2013 | 1,329  | (911 to 1,840)     | 8.1                          | (5.7 to 11.2)               |
|                  |         | Hemorrhagic Stroke | Male   | 1990 | 52     | (27 to 85)         | 1.2                          | (0.6 to 1.9)                |
|                  |         |                    |        | 2013 | 102    | (57 to 160)        | 1.1                          | (0.6 to 1.8)                |
|                  |         |                    | Female | 1990 | 53     | (32 to 80)         | 1.1                          | (0.7 to 1.7)                |
| Counts, All Ages |         |                    |        |      |        |                    |                              |                             |
| Country          | measure | Stroke Type        | sex    | year | Mean   | 95% UI             | Rate<br>Age-<br>standardized | Per 100,000<br>standardized |
|                  |         |                    |        | 2013 | 117    | (69 to 183)        | 1.2                          | (0.7 to 1.9)                |
|                  |         |                    | Both   | 1990 | 105    | (64 to 156)        | 1.2                          | (0.7 to 1.7)                |
|                  |         |                    | Both   | 2013 | 219    | (136 to 324)       | 1.2                          | (0.7 to 1.7)                |
| Ireland          | Deaths  | Ischemic Stroke    | Male   | 1990 | 773    | (602 to 951)       | 50.8                         | (39.5 to 62.6)              |
|                  |         |                    |        | 2013 | 593    | (437 to 785)       | 24.8                         | (18.3 to 33.0)              |
|                  |         |                    | Female | 1990 | 1,117  | (812 to 1,277)     | 48.1                         | (34.9 to 55.2)              |
|                  |         |                    |        | 2013 | 869    | (662 to 1,232)     | 24.3                         | (18.6 to 34.5)              |
|                  |         |                    | Both   | 1990 | 1,891  | (1,555 to 2,134)   | 49.7                         | (41.0 to 56.2)              |
|                  |         |                    |        | 2013 | 1,463  | (1,191 to 1,889)   | 24.7                         | (20.2 to 31.9)              |
|                  | Deaths  | Hemorrhagic Stroke | Male   | 1990 | 500    | (391 to 667)       | 31.7                         | (24.5 to 41.8)              |
|                  |         |                    |        | 2013 | 467    | (315 to 603)       | 19                           | (12.8 to 24.6)              |
|                  |         |                    | Female | 1990 | 710    | (559 to 945)       | 32.8                         | (25.9 to 43.3)              |
|                  |         |                    |        | 2013 | 604    | (395 to 797)       | 18.1                         | (12.2 to 23.7)              |
|                  |         |                    | Both   | 1990 | 1,210  | (1,053 to 1,499)   | 32.4                         | (28.2 to 40.2)              |
|                  |         |                    |        | 2013 | 1,072  | (808 to 1,295)     | 18.6                         | (14.1 to 22.4)              |
|                  | DALYs   | Ischemic Stroke    | Male   | 1990 | 11,757 | (9,442 to 14,174)  | 723.3                        | (578.6 to 871.9)            |
|                  |         |                    |        | 2013 | 8,638  | (6,847 to 10,859)  | 346.7                        | (275.7 to 435.1)            |
|                  |         |                    | Female | 1990 | 12,941 | (9,762 to 14,558)  | 576                          | (434.8 to 648.6)            |
|                  |         |                    |        | 2013 | 8,719  | (6,954 to 11,847)  | 268.3                        | (213.9 to 361.4)            |
|                  |         |                    | Both   | 1990 | 24,698 | (20,945 to 27,735) | 644                          | (544.7 to 724.1)            |

|                  |         |                    |        |      |        |                    |       |                  |
|------------------|---------|--------------------|--------|------|--------|--------------------|-------|------------------|
|                  |         |                    |        | 2013 | 17,357 | (14,538 to 21,520) | 305.7 | (256.5 to 377.4) |
|                  |         | Hemorrhagic Stroke | Male   | 1990 | 9,536  | (7,664 to 12,610)  | 576.3 | (464.6 to 759.1) |
|                  |         |                    |        | 2013 | 7,899  | (5,666 to 10,007)  | 310.1 | (223.6 to 392.7) |
|                  |         |                    | Female | 1990 | 11,193 | (9,009 to 14,367)  | 564   | (455.9 to 719.4) |
|                  |         |                    |        | 2013 | 7,940  | (5,873 to 10,206)  | 267.3 | (199.8 to 344.1) |
|                  |         |                    | Both   | 1990 | 20,729 | (18,309 to 25,115) | 569.5 | (503.3 to 688.5) |
|                  |         |                    |        | 2013 | 15,839 | (12,618 to 18,568) | 287.6 | (229.7 to 337.6) |
|                  | YLDs    | Ischemic Stroke    | Male   | 1990 | 1,514  | (975 to 2,140)     | 91.1  | (58.6 to 128.6)  |
|                  |         |                    |        | 2013 | 2,266  | (1,436 to 3,288)   | 88.2  | (55.9 to 128.4)  |
|                  |         |                    | Female | 1990 | 1,310  | (858 to 1,868)     | 63.2  | (41.6 to 89.9)   |
|                  |         |                    |        | 2013 | 1,796  | (1,179 to 2,563)   | 60.4  | (39.5 to 86.1)   |
|                  |         |                    | Both   | 1990 | 2,824  | (1,866 to 3,840)   | 75.7  | (50.0 to 103.1)  |
|                  |         |                    |        | 2013 | 4,062  | (2,678 to 5,606)   | 73.5  | (48.5 to 101.4)  |
|                  |         | Hemorrhagic Stroke | Male   | 1990 | 290    | (170 to 457)       | 17.5  | (10.3 to 27.2)   |
|                  |         |                    |        | 2013 | 452    | (214 to 727)       | 17.6  | (8.5 to 28.4)    |
|                  |         |                    | Female | 1990 | 269    | (136 to 500)       | 13.6  | (7.1 to 23.9)    |
|                  |         |                    |        | 2013 | 381    | (213 to 612)       | 13.3  | (7.5 to 21.1)    |
|                  |         |                    | Both   | 1990 | 560    | (345 to 841)       | 15.3  | (9.6 to 22.7)    |
|                  |         |                    | Both   | 2013 | 833    | (514 to 1,219)     | 15.3  | (9.5 to 22.4)    |
| Counts, All Ages |         |                    |        |      |        |                    |       |                  |
|                  |         |                    |        |      |        |                    | Rate  | Per 100,000      |
|                  |         |                    |        |      |        |                    | Age-  | standardized     |
| Country          | measure | Stroke Type        | sex    | year | Mean   | 95% UI             | Mean  | 95% UI           |
| Israel           | Deaths  | Ischemic Stroke    | Male   | 1990 | 723    | (574 to 924)       | 41.8  | (33.1 to 53.4)   |
|                  |         |                    |        | 2013 | 526    | (321 to 709)       | 13.7  | (8.4 to 18.4)    |
|                  |         |                    | Female | 1990 | 855    | (644 to 1,044)     | 40.5  | (30.4 to 49.6)   |
|                  |         |                    |        | 2013 | 1,000  | (557 to 1,360)     | 17.3  | (9.8 to 23.4)    |
|                  |         |                    | Both   | 1990 | 1,579  | (1,343 to 1,848)   | 41.1  | (35.0 to 48.2)   |

|  |        |                    |        |      |        |                    |       |                  |
|--|--------|--------------------|--------|------|--------|--------------------|-------|------------------|
|  |        |                    |        | 2013 | 1,526  | (968 to 1,892)     | 16    | (10.1 to 19.8)   |
|  | Deaths | Hemorrhagic Stroke | Male   | 1990 | 514    | (406 to 774)       | 29.5  | (23.3 to 44.6)   |
|  |        |                    |        | 2013 | 481    | (260 to 660)       | 12.7  | (6.9 to 17.4)    |
|  |        |                    | Female | 1990 | 608    | (491 to 843)       | 29.1  | (23.4 to 40.4)   |
|  |        |                    |        | 2013 | 671    | (335 to 957)       | 12.4  | (6.4 to 17.5)    |
|  |        |                    | Both   | 1990 | 1,123  | (976 to 1,497)     | 29.3  | (25.5 to 39.1)   |
|  |        |                    |        | 2013 | 1,153  | (703 to 1,457)     | 12.6  | (7.8 to 15.9)    |
|  | DALYs  | Ischemic Stroke    | Male   | 1990 | 10,655 | (8,604 to 13,305)  | 602.6 | (485.7 to 751.3) |
|  |        |                    |        | 2013 | 7,825  | (5,479 to 9,801)   | 210.1 | (147.3 to 264.0) |
|  |        |                    | Female | 1990 | 11,139 | (8,646 to 13,336)  | 523.1 | (406.8 to 622.1) |
|  |        |                    |        | 2013 | 10,124 | (6,572 to 13,146)  | 199.4 | (132.2 to 260.1) |
|  |        |                    | Both   | 1990 | 21,794 | (18,798 to 25,246) | 560.3 | (482.7 to 646.7) |
|  |        |                    |        | 2013 | 17,950 | (12,534 to 21,673) | 206   | (145.6 to 249.1) |
|  |        | Hemorrhagic Stroke | Male   | 1990 | 9,282  | (7,417 to 13,372)  | 522.6 | (417.2 to 756.9) |
|  |        |                    |        | 2013 | 7,344  | (4,238 to 9,471)   | 198.2 | (114.6 to 254.6) |
|  |        |                    | Female | 1990 | 9,623  | (7,856 to 12,930)  | 464.7 | (377.8 to 622.6) |
|  |        |                    |        | 2013 | 7,235  | (4,187 to 10,186)  | 153.1 | (89.6 to 218.1)  |
|  |        |                    | Both   | 1990 | 18,906 | (16,491 to 24,770) | 492.4 | (429.3 to 646.1) |
|  |        |                    |        | 2013 | 14,579 | (9,769 to 17,707)  | 174.7 | (119.5 to 212.2) |
|  | YLDs   | Ischemic Stroke    | Male   | 1990 | 1,044  | (704 to 1,419)     | 58.7  | (39.4 to 80.0)   |
|  |        |                    |        | 2013 | 2,274  | (1,485 to 3,187)   | 61.5  | (40.1 to 86.1)   |
|  |        |                    | Female | 1990 | 1,151  | (747 to 1,601)     | 55.3  | (35.8 to 76.9)   |
|  |        |                    |        | 2013 | 2,236  | (1,524 to 3,082)   | 48.7  | (33.3 to 66.6)   |
|  |        |                    | Both   | 1990 | 2,196  | (1,471 to 2,991)   | 56.8  | (38.0 to 77.5)   |
|  |        |                    |        | 2013 | 4,511  | (3,102 to 6,075)   | 54.5  | (37.9 to 73.1)   |
|  |        | Hemorrhagic Stroke | Male   | 1990 | 204    | (131 to 286)       | 11.2  | (7.3 to 15.9)    |

|         |         |                    |        |      |             |                      |       |                  |
|---------|---------|--------------------|--------|------|-------------|----------------------|-------|------------------|
|         |         |                    |        | 2013 | 445         | (282 to 636)         | 12    | (7.6 to 17.3)    |
|         |         |                    | Female | 1990 | 115         | (73 to 165)          | 5.6   | (3.5 to 8.0)     |
|         |         |                    |        | 2013 | 225         | (146 to 324)         | 5.2   | (3.3 to 7.4)     |
|         |         |                    | Both   | 1990 | 319         | (212 to 437)         | 8.2   | (5.4 to 11.2)    |
|         |         |                    | Both   | 2013 | 670         | (448 to 918)         | 8.3   | (5.6 to 11.3)    |
| Italy   | Deaths  | Ischemic Stroke    | Male   | 1990 | 20,181      | (16,326 to 23,775)   | 64.7  | (52.2 to 76.0)   |
|         |         |                    |        | 2013 | 15,970      | (11,861 to 20,108)   | 26.2  | (19.6 to 32.9)   |
|         |         |                    | Female | 1990 | 29,819      | (22,224 to 33,658)   | 54.1  | (40.5 to 60.7)   |
|         |         |                    |        |      | Counts, All | Ages                 | Rate  | Per 100,000      |
|         |         |                    |        |      | Mean        | 95% UI               | Age-  | standardized     |
| Country | measure | Stroke Type        | sex    | year | Mean        | 95% UI               | Mean  | 95% UI           |
|         |         |                    |        | 2013 | 26,278      | (20,339 to 37,197)   | 24.6  | (19.1 to 35.2)   |
|         |         |                    | Both   | 1990 | 50,000      | (41,530 to 55,259)   | 58.5  | (48.6 to 64.7)   |
|         |         |                    |        | 2013 | 42,248      | (35,128 to 54,098)   | 25.5  | (21.3 to 32.7)   |
|         | Deaths  | Hemorrhagic Stroke | Male   | 1990 | 11,229      | (9,026 to 14,258)    | 34.7  | (27.9 to 44.3)   |
|         |         |                    |        | 2013 | 11,899      | (7,687 to 15,528)    | 20.9  | (13.8 to 27.0)   |
|         |         |                    | Female | 1990 | 14,867      | (11,219 to 18,709)   | 29.1  | (22.2 to 36.1)   |
|         |         |                    |        | 2013 | 16,409      | (10,882 to 22,178)   | 17.5  | (12.4 to 23.4)   |
|         |         |                    | Both   | 1990 | 26,096      | (22,181 to 31,375)   | 31.6  | (26.9 to 38.0)   |
|         |         |                    |        | 2013 | 28,308      | (20,401 to 34,724)   | 19.1  | (14.2 to 23.1)   |
|         | DALYs   | Ischemic Stroke    | Male   | 1990 | 275,865     | (226,930 to 320,626) | 842.7 | (693.0 to 978.0) |
|         |         |                    |        | 2013 | 183,571     | (146,510 to 223,323) | 324.6 | (258.7 to 394.5) |
|         |         |                    | Female | 1990 | 301,820     | (228,800 to 335,568) | 584.4 | (443.5 to 650.3) |
|         |         |                    |        | 2013 | 206,307     | (167,359 to 290,356) | 230.8 | (188.6 to 326.2) |
|         |         |                    | Both   | 1990 | 577,686     | (490,458 to          | 693.1 | (587.5 to 765.6) |

|         |         |                    |        |      |             |                      |       |                  |
|---------|---------|--------------------|--------|------|-------------|----------------------|-------|------------------|
|         |         |                    |        |      |             | 638,137)             |       |                  |
|         |         |                    |        | 2013 | 389,879     | (332,428 to 484,070) | 272.8 | (232.7 to 337.1) |
|         |         | Hemorrhagic Stroke | Male   | 1990 | 204,791     | (168,517 to 247,481) | 619.1 | (509.7 to 750.1) |
|         |         |                    |        | 2013 | 161,074     | (112,137 to 201,369) | 319.8 | (224.3 to 398.4) |
|         |         |                    | Female | 1990 | 205,317     | (161,917 to 248,340) | 463   | (368.5 to 561.0) |
|         |         |                    |        | 2013 | 159,200     | (118,520 to 210,745) | 232.1 | (182.3 to 302.8) |
|         |         |                    | Both   | 1990 | 410,108     | (360,529 to 475,266) | 533.4 | (471.7 to 618.0) |
|         |         |                    |        | 2013 | 320,274     | (249,788 to 381,143) | 272.2 | (218.8 to 321.0) |
|         | YLDs    | Ischemic Stroke    | Male   | 1990 | 25,154      | (17,083 to 35,952)   | 74.5  | (50.8 to 106.2)  |
|         |         |                    |        | 2013 | 31,133      | (20,541 to 43,386)   | 61.1  | (40.5 to 84.4)   |
|         |         |                    | Female | 1990 | 18,845      | (12,874 to 26,145)   | 40.3  | (27.4 to 55.7)   |
|         |         |                    |        | 2013 | 22,277      | (13,749 to 32,539)   | 33.9  | (21.5 to 48.4)   |
|         |         |                    | Both   | 1990 | 43,999      | (30,513 to 59,717)   | 54.8  | (38.0 to 75.0)   |
|         |         |                    |        | 2013 | 53,411      | (36,508 to 72,784)   | 46.2  | (31.5 to 62.0)   |
|         |         | Hemorrhagic Stroke | Male   | 1990 | 4,641       | (3,006 to 6,634)     | 13.9  | (9.0 to 19.8)    |
|         |         |                    |        | 2013 | 6,703       | (4,268 to 9,262)     | 13.7  | (8.8 to 18.8)    |
|         |         |                    | Female | 1990 | 4,734       | (3,171 to 6,567)     | 10.9  | (7.3 to 15.2)    |
|         |         |                    |        | 2013 | 6,052       | (3,825 to 8,720)     | 10.4  | (6.7 to 14.7)    |
|         |         |                    |        |      | Counts, All | Ages                 | Rate  | Per 100,000      |
|         |         |                    |        |      |             |                      | Age-  | standardized     |
| Country | measure | Stroke Type        | sex    | year | Mean        | 95% UI               | Mean  | 95% UI           |
|         |         |                    | Both   | 1990 | 9,375       | (6,274 to 12,744)    | 12.2  | (8.1 to 16.5)    |

|         |        |                    |        |      |        |                    |        |                    |
|---------|--------|--------------------|--------|------|--------|--------------------|--------|--------------------|
|         |        |                    | Both   | 2013 | 12,755 | (8,669 to 17,399)  | 11.8   | (8.1 to 16.1)      |
| Jamaica | Deaths | Ischemic Stroke    | Male   | 1990 | 617    | (518 to 715)       | 82.6   | (69.1 to 95.9)     |
|         |        |                    |        | 2013 | 724    | (542 to 933)       | 70.9   | (53.1 to 91.3)     |
|         |        |                    | Female | 1990 | 998    | (825 to 1,207)     | 100.4  | (82.7 to 121.1)    |
|         |        |                    |        | 2013 | 1,116  | (813 to 1,449)     | 79     | (57.9 to 103.1)    |
|         |        |                    | Both   | 1990 | 1,616  | (1,418 to 1,832)   | 93.1   | (81.7 to 105.6)    |
|         |        |                    |        | 2013 | 1,840  | (1,459 to 2,209)   | 76.2   | (60.4 to 91.5)     |
|         | Deaths | Hemorrhagic Stroke | Male   | 1990 | 264    | (213 to 332)       | 34.6   | (28.0 to 43.6)     |
|         |        |                    |        | 2013 | 369    | (238 to 492)       | 34.5   | (22.3 to 46.0)     |
|         |        |                    | Female | 1990 | 434    | (354 to 571)       | 45.8   | (37.3 to 59.8)     |
|         |        |                    |        | 2013 | 565    | (400 to 768)       | 41.3   | (29.5 to 56.6)     |
|         |        |                    | Both   | 1990 | 698    | (606 to 888)       | 40.9   | (35.4 to 51.9)     |
|         |        |                    |        | 2013 | 934    | (720 to 1,161)     | 38.6   | (29.7 to 47.9)     |
|         | DALYs  | Ischemic Stroke    | Male   | 1990 | 9,413  | (7,963 to 10,828)  | 1221.7 | (1032.6 to 1405.8) |
|         |        |                    |        | 2013 | 10,870 | (7,989 to 14,091)  | 1013.8 | (750.2 to 1314.0)  |
|         |        |                    | Female | 1990 | 12,601 | (10,128 to 15,005) | 1344.6 | (1078.4 to 1602.5) |
|         |        |                    |        | 2013 | 12,948 | (9,533 to 17,230)  | 989.6  | (722.5 to 1322.2)  |
|         |        |                    | Both   | 1990 | 22,015 | (19,165 to 24,851) | 1294.8 | (1127.9 to 1460.2) |
|         |        |                    |        | 2013 | 23,819 | (19,108 to 28,856) | 1008.6 | (807.1 to 1222.8)  |
|         |        | Hemorrhagic Stroke | Male   | 1990 | 5,954  | (4,900 to 7,324)   | 717    | (587.6 to 888.9)   |
|         |        |                    |        | 2013 | 7,621  | (5,292 to 10,286)  | 656.5  | (451.6 to 885.3)   |
|         |        |                    | Female | 1990 | 8,094  | (6,531 to 10,057)  | 882.9  | (715.8 to 1098.4)  |
|         |        |                    |        | 2013 | 9,120  | (6,531 to 12,765)  | 699.6  | (498.6 to 983.5)   |
|         |        |                    | Both   | 1990 | 14,048 | (12,306 to 16,565) | 806.7  | (706.4 to 957.8)   |
|         |        |                    |        | 2013 | 16,742 | (13,328 to 20,786) | 682.5  | (540.6 to 844.0)   |
|         | YLDs   | Ischemic Stroke    | Male   | 1990 | 359    | (239 to 504)       | 47.6   | (31.5 to 66.8)     |
|         |        |                    |        | 2013 | 494    | (314 to 705)       | 45.7   | (29.0 to 65.2)     |

|         |         |                    |        |      |             |                      |       |                  |
|---------|---------|--------------------|--------|------|-------------|----------------------|-------|------------------|
|         |         |                    | Female | 1990 | 281         | (177 to 405)         | 30.8  | (19.4 to 43.9)   |
|         |         |                    |        | 2013 | 394         | (253 to 574)         | 30.5  | (19.5 to 44.6)   |
|         |         |                    | Both   | 1990 | 640         | (433 to 870)         | 38.4  | (26.1 to 52.0)   |
|         |         |                    |        | 2013 | 888         | (601 to 1,209)       | 37.4  | (25.2 to 51.2)   |
|         |         | Hemorrhagic Stroke | Male   | 1990 | 119         | (74 to 176)          | 15.4  | (9.6 to 22.8)    |
|         |         |                    |        | 2013 | 166         | (100 to 272)         | 14.5  | (8.7 to 24.5)    |
|         |         |                    | Female | 1990 | 92          | (55 to 149)          | 10.2  | (6.0 to 16.6)    |
|         |         |                    |        | 2013 | 132         | (81 to 212)          | 10.1  | (6.3 to 16.6)    |
|         |         |                    | Both   | 1990 | 211         | (136 to 304)         | 12.6  | (8.1 to 18.1)    |
|         |         |                    | Both   | 2013 | 298         | (192 to 429)         | 12.2  | (7.8 to 17.7)    |
| Japan   | Deaths  | Ischemic Stroke    | Male   | 1990 | 36,801      | (31,584 to 42,286)   | 68.9  | (58.8 to 78.8)   |
|         |         |                    |        |      | Counts, All | Ages                 | Rate  | Per 100,000      |
|         |         |                    |        |      |             |                      | Age-  | standardized     |
| Country | measure | Stroke Type        | sex    | year | Mean        | 95% UI               | Mean  | 95% UI           |
|         |         |                    |        | 2013 | 52,867      | (42,940 to 63,346)   | 36.5  | (29.7 to 43.7)   |
|         |         |                    | Female | 1990 | 45,489      | (34,836 to 51,691)   | 52.8  | (40.3 to 59.9)   |
|         |         |                    |        | 2013 | 64,703      | (49,177 to 99,027)   | 25.1  | (19.2 to 39.0)   |
|         |         |                    | Both   | 1990 | 82,291      | (70,344 to 90,340)   | 59.3  | (50.6 to 65.1)   |
|         |         |                    |        | 2013 | 117,570     | (98,196 to 156,199)  | 30.1  | (25.1 to 39.7)   |
|         | Deaths  | Hemorrhagic Stroke | Male   | 1990 | 23,262      | (19,657 to 28,140)   | 37.1  | (30.9 to 45.4)   |
|         |         |                    |        | 2013 | 32,670      | (22,636 to 40,485)   | 26.2  | (18.7 to 32.2)   |
|         |         |                    | Female | 1990 | 25,550      | (20,483 to 32,867)   | 30    | (24.1 to 38.5)   |
|         |         |                    |        | 2013 | 35,336      | (27,376 to 47,837)   | 17.6  | (14.3 to 23.8)   |
|         |         |                    | Both   | 1990 | 48,813      | (43,561 to 57,923)   | 33.4  | (29.7 to 39.9)   |
|         |         |                    |        | 2013 | 68,006      | (54,476 to 80,497)   | 21.7  | (18.1 to 25.0)   |
|         | DALYs   | Ischemic Stroke    | Male   | 1990 | 509,293     | (434,189 to 581,929) | 866.7 | (742.2 to 987.3) |

|                  |      |                    |        |      |           |                        |       |                  |  |
|------------------|------|--------------------|--------|------|-----------|------------------------|-------|------------------|--|
|                  |      |                    |        | 2013 | 621,428   | (523,657 to 725,371)   | 465.6 | (390.6 to 543.0) |  |
|                  |      |                    | Female | 1990 | 464,182   | (357,110 to 518,703)   | 537.8 | (413.3 to 601.8) |  |
|                  |      |                    |        | 2013 | 495,096   | (392,474 to 729,961)   | 238.9 | (189.1 to 348.4) |  |
|                  |      |                    | Both   | 1990 | 973,476   | (841,171 to 1,072,229) | 674.5 | (582.6 to 742.0) |  |
|                  |      |                    |        | 2013 | 1,116,524 | (956,082 to 1,414,590) | 339.4 | (289.1 to 425.1) |  |
|                  |      | Hemorrhagic Stroke | Male   | 1990 | 541,828   | (471,588 to 629,226)   | 790.2 | (684.1 to 919.3) |  |
|                  |      |                    |        | 2013 | 565,908   | (430,152 to 678,941)   | 538.9 | (418.8 to 640.6) |  |
|                  |      |                    | Female | 1990 | 438,354   | (360,535 to 525,949)   | 531.4 | (435.6 to 637.0) |  |
|                  |      |                    |        | 2013 | 402,072   | (335,170 to 536,662)   | 294.4 | (249.8 to 391.3) |  |
|                  |      |                    | Both   | 1990 | 980,182   | (882,687 to 1,106,043) | 654.8 | (589.9 to 736.8) |  |
|                  |      |                    |        | 2013 | 967,981   | (829,670 to 1,103,960) | 412.3 | (356.9 to 468.0) |  |
|                  | YLDs | Ischemic Stroke    | Male   | 1990 | 57,454    | (38,479 to 80,973)     | 90.4  | (61.1 to 125.8)  |  |
|                  |      |                    |        | 2013 | 105,410   | (69,263 to 148,249)    | 85.9  | (57.2 to 120.0)  |  |
|                  |      |                    | Female | 1990 | 45,727    | (30,683 to 64,000)     | 53.8  | (36.2 to 75.0)   |  |
|                  |      |                    |        | 2013 | 85,368    | (55,073 to 120,118)    | 51.9  | (34.1 to 73.8)   |  |
|                  |      |                    | Both   | 1990 | 103,181   | (71,665 to 141,523)    | 69.5  | (48.1 to 95.4)   |  |
| Counts, All Ages |      |                    |        |      |           |                        | Rate  | Per 100,000      |  |
|                  |      |                    |        |      |           |                        | Age-  | standardized     |  |



| Country | measure | Stroke Type        | sex    | year | Mean    | 95% UI               | Mean   | 95% UI             |
|---------|---------|--------------------|--------|------|---------|----------------------|--------|--------------------|
|         |         |                    |        | 2013 | 190,778 | (129,962 to 260,458) | 67.5   | (46.1 to 92.0)     |
|         |         | Hemorrhagic Stroke | Male   | 1990 | 19,181  | (12,214 to 28,300)   | 29.9   | (19.3 to 43.8)     |
|         |         |                    |        | 2013 | 34,374  | (21,221 to 50,086)   | 30.4   | (19.1 to 43.8)     |
|         |         |                    | Female | 1990 | 15,919  | (9,757 to 23,208)    | 19.3   | (12.1 to 28.1)     |
|         |         |                    |        | 2013 | 31,797  | (20,403 to 46,642)   | 22.8   | (14.7 to 33.1)     |
|         |         |                    | Both   | 1990 | 35,100  | (22,985 to 49,256)   | 23.8   | (15.7 to 33.3)     |
|         |         |                    | Both   | 2013 | 66,172  | (43,119 to 91,409)   | 26.2   | (17.3 to 36.0)     |
| Jordan  | Deaths  | Ischemic Stroke    | Male   | 1990 | 670     | (526 to 876)         | 121.8  | (95.9 to 157.9)    |
|         |         |                    |        | 2013 | 696     | (543 to 878)         | 70.2   | (55.6 to 86.5)     |
|         |         |                    | Female | 1990 | 603     | (483 to 758)         | 117.9  | (93.8 to 148.5)    |
|         |         |                    |        | 2013 | 739     | (589 to 898)         | 74.1   | (59.7 to 89.3)     |
|         |         |                    | Both   | 1990 | 1,273   | (1,074 to 1,522)     | 119.8  | (101.5 to 142.3)   |
|         |         |                    |        | 2013 | 1,435   | (1,212 to 1,650)     | 72.4   | (61.1 to 82.7)     |
|         | Deaths  | Hemorrhagic Stroke | Male   | 1990 | 260     | (176 to 357)         | 40.9   | (27.4 to 57.2)     |
|         |         |                    |        | 2013 | 277     | (198 to 381)         | 21.5   | (15.4 to 29.9)     |
|         |         |                    | Female | 1990 | 226     | (156 to 295)         | 37.3   | (25.4 to 50.0)     |
|         |         |                    |        | 2013 | 259     | (189 to 349)         | 20.5   | (14.9 to 27.4)     |
|         |         |                    | Both   | 1990 | 486     | (374 to 611)         | 39.2   | (30.1 to 49.8)     |
|         |         |                    |        | 2013 | 536     | (435 to 657)         | 21     | (17.2 to 26.1)     |
|         | DALYs   | Ischemic Stroke    | Male   | 1990 | 10,598  | (8,128 to 14,455)    | 1700   | (1311.7 to 2284.5) |
|         |         |                    |        | 2013 | 11,445  | (8,686 to 14,873)    | 861.4  | (675.4 to 1090.5)  |
|         |         |                    | Female | 1990 | 9,182   | (7,242 to 11,601)    | 1565.5 | (1244.7 to 1980.3) |
|         |         |                    |        | 2013 | 10,447  | (7,977 to 12,975)    | 816.9  | (643.2 to 996.6)   |
|         |         |                    | Both   | 1990 | 19,780  | (16,464 to 24,397)   | 1633   | (1363.7 to 1988.2) |
|         |         |                    |        | 2013 | 21,893  | (18,140 to 25,903)   | 841    | (707.0 to 972.7)   |

|            |         |                    |        |      |             |                    |       |                   |
|------------|---------|--------------------|--------|------|-------------|--------------------|-------|-------------------|
|            |         | Hemorrhagic Stroke | Male   | 1990 | 6,484       | (4,602 to 8,716)   | 787.7 | (537.7 to 1098.8) |
|            |         |                    |        | 2013 | 6,500       | (4,589 to 8,949)   | 364   | (259.4 to 500.5)  |
|            |         |                    | Female | 1990 | 5,584       | (3,795 to 7,098)   | 718.5 | (491.5 to 927.0)  |
|            |         |                    |        | 2013 | 5,664       | (4,108 to 7,694)   | 324.7 | (238.2 to 440.9)  |
|            |         |                    | Both   | 1990 | 12,069      | (9,400 to 14,797)  | 754.6 | (580.9 to 941.1)  |
|            |         |                    |        | 2013 | 12,164      | (9,744 to 15,042)  | 344.7 | (278.2 to 424.9)  |
|            | YLDs    | Ischemic Stroke    | Male   | 1990 | 71          | (47 to 103)        | 9.6   | (6.2 to 13.9)     |
|            |         |                    |        | 2013 | 201         | (127 to 288)       | 10.3  | (6.5 to 14.7)     |
|            |         |                    | Female | 1990 | 50          | (32 to 75)         | 7.2   | (4.6 to 10.6)     |
|            |         |                    |        | 2013 | 140         | (90 to 203)        | 7.2   | (4.7 to 10.5)     |
|            |         |                    | Both   | 1990 | 122         | (84 to 167)        | 8.4   | (5.8 to 11.5)     |
|            |         |                    |        | 2013 | 342         | (227 to 484)       | 8.7   | (5.9 to 12.4)     |
|            |         | Hemorrhagic Stroke | Male   | 1990 | 10          | (5 to 17)          | 1.3   | (0.6 to 2.0)      |
|            |         |                    |        |      | Counts, All | Ages               | Rate  | Per 100,000       |
|            |         |                    |        |      |             |                    | Age-  | standardized      |
| Country    | measure | Stroke Type        | sex    | year | Mean        | 95% UI             | Mean  | 95% UI            |
|            |         |                    |        | 2013 | 29          | (17 to 45)         | 1.3   | (0.8 to 1.9)      |
|            |         |                    | Female | 1990 | 9           | (5 to 14)          | 1.2   | (0.6 to 1.9)      |
|            |         |                    |        | 2013 | 27          | (16 to 42)         | 1.3   | (0.8 to 2.0)      |
|            |         |                    | Both   | 1990 | 20          | (12 to 29)         | 1.2   | (0.7 to 1.8)      |
|            |         |                    | Both   | 2013 | 57          | (36 to 82)         | 1.3   | (0.8 to 1.8)      |
| Kazakhstan | Deaths  | Ischemic Stroke    | Male   | 1990 | 4,647       | (3,732 to 5,633)   | 152.9 | (125.8 to 183.3)  |
|            |         |                    |        | 2013 | 6,575       | (5,234 to 8,082)   | 168.7 | (135.0 to 205.0)  |
|            |         |                    | Female | 1990 | 8,491       | (7,303 to 10,251)  | 128.1 | (110.3 to 154.1)  |
|            |         |                    |        | 2013 | 9,760       | (6,686 to 11,793)  | 138.1 | (95.4 to 166.2)   |
|            |         |                    | Both   | 1990 | 13,138      | (11,589 to 15,230) | 137.2 | (121.4 to 158.7)  |
|            |         |                    |        | 2013 | 16,335      | (12,757 to 18,792) | 150.9 | (116.9 to 172.9)  |

|  |        |                    |        |      |         |                      |        |                    |
|--|--------|--------------------|--------|------|---------|----------------------|--------|--------------------|
|  | Deaths | Hemorrhagic Stroke | Male   | 1990 | 3,891   | (3,007 to 4,729)     | 101.7  | (76.5 to 124.4)    |
|  |        |                    |        | 2013 | 4,897   | (3,582 to 6,271)     | 100.2  | (72.4 to 129.3)    |
|  |        |                    | Female | 1990 | 5,692   | (4,350 to 6,868)     | 83.2   | (63.5 to 100.5)    |
|  |        |                    |        | 2013 | 5,852   | (4,160 to 7,655)     | 77.9   | (55.4 to 102.6)    |
|  |        |                    | Both   | 1990 | 9,583   | (7,783 to 10,806)    | 90.6   | (72.9 to 103.0)    |
|  |        |                    |        | 2013 | 10,749  | (8,455 to 12,953)    | 87.5   | (68.1 to 107.4)    |
|  | DALYs  | Ischemic Stroke    | Male   | 1990 | 89,604  | (69,220 to 111,785)  | 2341.6 | (1870.4 to 2839.9) |
|  |        |                    |        | 2013 | 131,713 | (104,445 to 165,230) | 2676.6 | (2141.5 to 3292.8) |
|  |        |                    | Female | 1990 | 116,569 | (99,589 to 142,856)  | 1702   | (1458.1 to 2083.4) |
|  |        |                    |        | 2013 | 137,432 | (93,240 to 170,468)  | 1817.3 | (1237.3 to 2243.8) |
|  |        |                    | Both   | 1990 | 206,173 | (178,871 to 242,098) | 1943.5 | (1703.7 to 2278.9) |
|  |        |                    |        | 2013 | 269,146 | (213,173 to 315,928) | 2171.7 | (1717.7 to 2526.0) |
|  |        | Hemorrhagic Stroke | Male   | 1990 | 100,867 | (79,418 to 122,680)  | 2088   | (1634.8 to 2542.7) |
|  |        |                    |        | 2013 | 130,028 | (96,746 to 167,109)  | 2143.6 | (1598.2 to 2741.4) |
|  |        |                    | Female | 1990 | 109,259 | (87,686 to 130,959)  | 1539.5 | (1233.4 to 1846.0) |
|  |        |                    |        | 2013 | 116,724 | (86,036 to 148,624)  | 1441.8 | (1047.9 to 1835.7) |
|  |        |                    | Both   | 1990 | 210,127 | (174,244 to 238,003) | 1767.9 | (1458.2 to 1998.2) |
|  |        |                    |        | 2013 | 246,752 | (201,263 to 296,079) | 1748.5 | (1403.6 to 2095.7) |

|         | YLDs    | Ischemic Stroke    | Male   | 1990 | 438              | (267 to 653)     | 9.2                          | (5.7 to 13.5)  |
|---------|---------|--------------------|--------|------|------------------|------------------|------------------------------|----------------|
|         |         |                    |        | 2013 | 535              | (339 to 797)     | 9.3                          | (6.1 to 13.6)  |
|         |         |                    | Female | 1990 | 597              | (390 to 856)     | 8.4                          | (5.5 to 12.0)  |
|         |         |                    |        |      | Counts, All Ages |                  | Rate                         | Per 100,000    |
| Country | measure | Stroke Type        | sex    | year | Mean             | 95% UI           | Age-<br>standardized<br>Mean | 95% UI         |
|         |         |                    |        | 2013 | 637              | (407 to 933)     | 7.9                          | (5.0 to 11.4)  |
|         |         |                    | Both   | 1990 | 1,036            | (700 to 1,455)   | 8.8                          | (6.0 to 12.3)  |
|         |         |                    |        | 2013 | 1,173            | (805 to 1,635)   | 8.4                          | (5.8 to 11.6)  |
|         |         | Hemorrhagic Stroke | Male   | 1990 | 453              | (280 to 668)     | 8.2                          | (5.2 to 12.2)  |
|         |         |                    |        | 2013 | 517              | (328 to 767)     | 8                            | (5.1 to 11.7)  |
|         |         |                    | Female | 1990 | 338              | (208 to 496)     | 4.6                          | (2.8 to 6.9)   |
|         |         |                    |        | 2013 | 377              | (230 to 535)     | 4.5                          | (2.8 to 6.5)   |
|         |         |                    | Both   | 1990 | 791              | (525 to 1,122)   | 6.2                          | (4.1 to 8.7)   |
|         |         |                    | Both   | 2013 | 895              | (598 to 1,247)   | 6                            | (4.0 to 8.3)   |
| Kenya   | Deaths  | Ischemic Stroke    | Male   | 1990 | 1,261            | (543 to 1,812)   | 46.3                         | (20.4 to 66.6) |
|         |         |                    |        | 2013 | 2,347            | (1,125 to 3,316) | 46.6                         | (22.8 to 65.2) |
|         |         |                    | Female | 1990 | 1,727            | (877 to 2,468)   | 59.8                         | (30.3 to 85.9) |
|         |         |                    |        | 2013 | 2,935            | (1,443 to 4,208) | 51.4                         | (25.0 to 74.1) |
|         |         |                    | Both   | 1990 | 2,989            | (1,630 to 3,984) | 53.6                         | (29.5 to 72.0) |
|         |         |                    |        | 2013 | 5,283            | (2,993 to 7,250) | 49.4                         | (27.9 to 67.5) |
|         | Deaths  | Hemorrhagic Stroke | Male   | 1990 | 1,634            | (1,132 to 2,352) | 50                           | (33.7 to 75.3) |
|         |         |                    |        | 2013 | 3,080            | (2,188 to 4,613) | 49.2                         | (33.6 to 77.3) |
|         |         |                    | Female | 1990 | 2,046            | (1,467 to 2,781) | 60.4                         | (40.8 to 85.5) |
|         |         |                    |        | 2013 | 3,180            | (2,057 to 4,512) | 46.8                         | (28.9 to 68.6) |
|         |         |                    | Both   | 1990 | 3,680            | (2,788 to 4,717) | 55.5                         | (39.0 to 74.5) |
|         |         |                    |        | 2013 | 6,260            | (4,759 to 8,474) | 48                           | (34.2 to 67.1) |

|         |         |                    |        |      |                  |                      |        |                   |
|---------|---------|--------------------|--------|------|------------------|----------------------|--------|-------------------|
|         | DALYs   | Ischemic Stroke    | Male   | 1990 | 21,463           | (9,399 to 31,063)    | 650.1  | (283.5 to 933.7)  |
|         |         |                    |        | 2013 | 39,816           | (18,632 to 58,336)   | 643.8  | (307.8 to 918.8)  |
|         |         |                    | Female | 1990 | 25,706           | (13,065 to 36,472)   | 767.4  | (393.0 to 1100.7) |
|         |         |                    |        | 2013 | 40,745           | (20,082 to 60,279)   | 608.8  | (301.0 to 884.5)  |
|         |         |                    | Both   | 1990 | 47,170           | (25,653 to 63,059)   | 712.8  | (388.9 to 948.1)  |
|         |         |                    |        | 2013 | 80,562           | (45,913 to 110,969)  | 627    | (352.2 to 862.1)  |
|         |         | Hemorrhagic Stroke | Male   | 1990 | 38,505           | (28,262 to 52,245)   | 910.4  | (637.1 to 1285.9) |
|         |         |                    |        | 2013 | 73,852           | (53,318 to 103,005)  | 879.1  | (624.2 to 1301.5) |
|         |         |                    | Female | 1990 | 43,972           | (32,926 to 56,181)   | 1036.2 | (759.5 to 1365.0) |
|         |         |                    |        | 2013 | 65,631           | (45,099 to 90,318)   | 737    | (488.6 to 1036.6) |
|         |         |                    | Both   | 1990 | 82,478           | (67,850 to 100,984)  | 976    | (760.0 to 1232.2) |
|         |         |                    |        | 2013 | 139,483          | (110,866 to 181,354) | 805.2  | (618.1 to 1081.7) |
|         | YLDs    | Ischemic Stroke    | Male   | 1990 | 466              | (291 to 675)         | 10.1   | (6.2 to 14.9)     |
|         |         |                    |        | 2013 | 1,039            | (613 to 1,543)       | 10.8   | (6.3 to 16.1)     |
|         |         |                    | Female | 1990 | 346              | (219 to 520)         | 7.2    | (4.6 to 11.1)     |
|         |         |                    |        |      | Counts, All Ages |                      | Rate   | Per 100,000       |
|         |         |                    |        |      |                  |                      | Age-   | standardized      |
| Country | measure | Stroke Type        | sex    | year | Mean             | 95% UI               | Mean   | 95% UI            |
|         |         |                    |        | 2013 | 771              | (490 to 1,143)       | 7.4    | (4.7 to 10.8)     |
|         |         |                    | Both   | 1990 | 812              | (529 to 1,155)       | 8.6    | (5.6 to 12.4)     |
|         |         |                    |        | 2013 | 1,810            | (1,162 to 2,521)     | 9      | (5.8 to 12.5)     |
|         |         | Hemorrhagic Stroke | Male   | 1990 | 165              | (100 to 248)         | 2.9    | (1.7 to 4.3)      |
|         |         |                    |        | 2013 | 387              | (234 to 609)         | 3.1    | (1.8 to 4.9)      |
|         |         |                    | Female | 1990 | 108              | (65 to 166)          | 1.9    | (1.2 to 2.9)      |

|          |        |                    |        |      |       |                  |        |                    |
|----------|--------|--------------------|--------|------|-------|------------------|--------|--------------------|
|          |        |                    |        | 2013 | 230   | (144 to 347)     | 1.8    | (1.1 to 2.7)       |
|          |        |                    | Both   | 1990 | 274   | (174 to 401)     | 2.4    | (1.5 to 3.4)       |
|          |        |                    | Both   | 2013 | 617   | (388 to 888)     | 2.4    | (1.5 to 3.5)       |
| Kiribati | Deaths | Ischemic Stroke    | Male   | 1990 | 12    | (8 to 15)        | 104.4  | (78.8 to 131.5)    |
|          |        |                    |        | 2013 | 22    | (15 to 30)       | 112.2  | (79.3 to 145.7)    |
|          |        |                    | Female | 1990 | 6     | (4 to 9)         | 44.5   | (30.5 to 66.2)     |
|          |        |                    |        | 2013 | 12    | (7 to 20)        | 51.7   | (28.9 to 77.8)     |
|          |        |                    | Both   | 1990 | 18    | (14 to 23)       | 69.5   | (56.2 to 85.2)     |
|          |        |                    |        | 2013 | 35    | (25 to 45)       | 76.6   | (56.8 to 96.0)     |
|          | Deaths | Hemorrhagic Stroke | Male   | 1990 | 25    | (19 to 33)       | 162.2  | (122.5 to 205.7)   |
|          |        |                    |        | 2013 | 54    | (35 to 76)       | 196.3  | (135.6 to 265.2)   |
|          |        |                    | Female | 1990 | 11    | (8 to 18)        | 65.8   | (45.2 to 102.9)    |
|          |        |                    |        | 2013 | 24    | (13 to 36)       | 86     | (49.5 to 124.8)    |
|          |        |                    | Both   | 1990 | 37    | (29 to 46)       | 108.7  | (87.6 to 136.2)    |
|          |        |                    |        | 2013 | 78    | (55 to 105)      | 135.6  | (96.5 to 175.9)    |
|          | DALYs  | Ischemic Stroke    | Male   | 1990 | 314   | (228 to 410)     | 2004.5 | (1499.4 to 2558.6) |
|          |        |                    |        | 2013 | 571   | (373 to 817)     | 2095.6 | (1434.8 to 2835.2) |
|          |        |                    | Female | 1990 | 150   | (98 to 227)      | 822.5  | (550.3 to 1232.7)  |
|          |        |                    |        | 2013 | 264   | (139 to 426)     | 868.3  | (471.6 to 1360.6)  |
|          |        |                    | Both   | 1990 | 464   | (364 to 584)     | 1343.4 | (1065.2 to 1683.6) |
|          |        |                    |        | 2013 | 836   | (577 to 1,115)   | 1412.3 | (1013.1 to 1821.1) |
|          |        | Hemorrhagic Stroke | Male   | 1990 | 926   | (695 to 1,194)   | 4304.5 | (3215.5 to 5560.9) |
|          |        |                    |        | 2013 | 1,830 | (1,198 to 2,616) | 5092.2 | (3368.7 to 7149.8) |
|          |        |                    | Female | 1990 | 345   | (249 to 554)     | 1552.4 | (1082.5 to 2469.4) |
|          |        |                    |        | 2013 | 650   | (364 to 994)     | 1835.7 | (1033.9 to 2756.6) |
|          |        |                    | Both   | 1990 | 1,272 | (1,022 to 1,599) | 2836.8 | (2251.9 to 3577.8) |
|          |        |                    |        | 2013 | 2,481 | (1,730 to 3,371) | 3375.2 | (2393.8 to 4519.3) |

|                  |         |                       |        |      |      |              |                      |                |
|------------------|---------|-----------------------|--------|------|------|--------------|----------------------|----------------|
|                  | YLDs    | Ischemic Stroke       | Male   | 1990 | 3    | (2 to 4)     | 26                   | (16.5 to 36.4) |
|                  |         |                       |        | 2013 | 6    | (3 to 8)     | 26.6                 | (16.7 to 38.2) |
|                  |         |                       | Female | 1990 | 3    | (1 to 4)     | 18.4                 | (11.8 to 26.9) |
|                  |         |                       |        | 2013 | 5    | (3 to 8)     | 20.6                 | (13.1 to 29.2) |
|                  |         |                       | Both   | 1990 | 6    | (4 to 8)     | 21.6                 | (14.2 to 29.7) |
|                  |         |                       |        | 2013 | 11   | (7 to 16)    | 23.1                 | (15.4 to 31.5) |
| Counts, All Ages |         |                       |        |      |      |              | Rate                 | Per 100,000    |
| Country          | measure | Stroke Type           | sex    | year | Mean | 95% UI       | Age-<br>standardized | 95% UI         |
|                  |         | Hemorrhagic<br>Stroke | Male   | 1990 | 4    | (2 to 6)     | 30.6                 | (20.2 to 43.0) |
|                  |         |                       |        | 2013 | 8    | (5 to 11)    | 31.6                 | (20.7 to 44.0) |
|                  |         |                       | Female | 1990 | 3    | (2 to 5)     | 20                   | (12.9 to 28.5) |
|                  |         |                       |        | 2013 | 6    | (4 to 9)     | 22.5                 | (14.9 to 32.3) |
|                  |         |                       | Both   | 1990 | 8    | (5 to 11)    | 24.5                 | (16.7 to 34.0) |
|                  |         |                       | Both   | 2013 | 15   | (10 to 20)   | 26.4                 | (18.1 to 35.8) |
| Kuwait           | Deaths  | Ischemic Stroke       | Male   | 1990 | 95   | (73 to 123)  | 55.5                 | (44.0 to 70.7) |
|                  |         |                       |        | 2013 | 242  | (180 to 293) | 51.3                 | (38.2 to 62.2) |
|                  |         |                       | Female | 1990 | 78   | (62 to 109)  | 55.1                 | (43.7 to 77.4) |
|                  |         |                       |        | 2013 | 140  | (93 to 164)  | 56.9                 | (38.6 to 67.1) |
|                  |         |                       | Both   | 1990 | 174  | (146 to 219) | 55.3                 | (46.9 to 70.1) |
|                  |         |                       |        | 2013 | 382  | (287 to 447) | 52.7                 | (40.3 to 61.2) |
|                  | Deaths  | Hemorrhagic<br>Stroke | Male   | 1990 | 77   | (53 to 99)   | 25.7                 | (15.4 to 34.4) |
|                  |         |                       |        | 2013 | 101  | (76 to 140)  | 13.8                 | (10.2 to 21.2) |
|                  |         |                       | Female | 1990 | 65   | (43 to 80)   | 29.5                 | (17.5 to 37.5) |
|                  |         |                       |        | 2013 | 59   | (47 to 85)   | 14.6                 | (11.1 to 22.9) |
|                  |         |                       | Both   | 1990 | 143  | (105 to 171) | 27.5                 | (18.5 to 34.2) |
|                  |         |                       |        | 2013 | 160  | (134 to 211) | 14                   | (11.1 to 20.2) |

|         |         |                    |        |      |                  |                  |       |                  |
|---------|---------|--------------------|--------|------|------------------|------------------|-------|------------------|
|         | DALYs   | Ischemic Stroke    | Male   | 1990 | 2,197            | (1,644 to 2,852) | 708.8 | (561.5 to 902.8) |
|         |         |                    |        | 2013 | 4,108            | (3,031 to 5,069) | 615.3 | (462.5 to 745.4) |
|         |         |                    | Female | 1990 | 1,556            | (1,211 to 2,228) | 684.2 | (547.0 to 956.3) |
|         |         |                    |        | 2013 | 2,508            | (1,622 to 3,002) | 626.1 | (423.3 to 731.7) |
|         |         |                    | Both   | 1990 | 3,754            | (3,083 to 4,768) | 695.7 | (588.2 to 866.1) |
|         |         |                    |        | 2013 | 6,616            | (4,946 to 7,829) | 613.5 | (463.1 to 712.3) |
|         |         | Hemorrhagic Stroke | Male   | 1990 | 2,645            | (1,910 to 3,312) | 461.9 | (304.5 to 597.2) |
|         |         |                    |        | 2013 | 3,028            | (2,277 to 3,967) | 250.2 | (190.0 to 350.0) |
|         |         |                    | Female | 1990 | 2,244            | (1,538 to 2,654) | 524.5 | (345.9 to 640.2) |
|         |         |                    |        | 2013 | 1,832            | (1,472 to 2,491) | 246.1 | (196.3 to 359.9) |
|         |         |                    | Both   | 1990 | 4,889            | (3,781 to 5,717) | 489.2 | (351.0 to 588.3) |
|         |         |                    |        | 2013 | 4,860            | (4,106 to 6,012) | 248.1 | (208.7 to 328.8) |
|         | YLDs    | Ischemic Stroke    | Male   | 1990 | 50               | (31 to 76)       | 9.2   | (5.9 to 13.4)    |
|         |         |                    |        | 2013 | 112              | (72 to 162)      | 9.9   | (6.5 to 13.7)    |
|         |         |                    | Female | 1990 | 25               | (15 to 38)       | 7.4   | (4.5 to 10.7)    |
|         |         |                    |        | 2013 | 51               | (32 to 73)       | 7.6   | (4.8 to 10.9)    |
|         |         |                    | Both   | 1990 | 76               | (49 to 108)      | 8.4   | (5.6 to 11.9)    |
|         |         |                    |        | 2013 | 164              | (106 to 228)     | 9     | (6.0 to 12.2)    |
|         |         | Hemorrhagic Stroke | Male   | 1990 | 10               | (5 to 16)        | 1.5   | (0.8 to 2.3)     |
|         |         |                    |        | 2013 | 21               | (11 to 32)       | 1.5   | (0.9 to 2.2)     |
|         |         |                    |        |      | Counts, All Ages |                  | Rate  | Per 100,000      |
|         |         |                    |        |      |                  |                  | Age-  | standardized     |
| Country | measure | Stroke Type        | sex    | year | Mean             | 95% UI           | Mean  | 95% UI           |
|         |         |                    | Female | 1990 | 6                | (3 to 10)        | 1.6   | (0.8 to 2.6)     |
|         |         |                    |        | 2013 | 10               | (5 to 16)        | 1.2   | (0.7 to 1.9)     |
|         |         |                    | Both   | 1990 | 17               | (11 to 25)       | 1.5   | (1.0 to 2.2)     |
|         |         |                    | Both   | 2013 | 31               | (20 to 46)       | 1.4   | (0.9 to 2.0)     |



|            |                    |                    |        |        |                    |                    |                    |                    |
|------------|--------------------|--------------------|--------|--------|--------------------|--------------------|--------------------|--------------------|
| Kyrgyzstan | Deaths             | Ischemic Stroke    | Male   | 1990   | 1,346              | (1,078 to 1,674)   | 174.2              | (142.9 to 212.3)   |
|            |                    |                    |        | 2013   | 1,682              | (1,370 to 2,043)   | 156.7              | (127.9 to 189.6)   |
|            |                    |                    | Female | 1990   | 2,202              | (1,803 to 2,610)   | 150.5              | (123.0 to 177.7)   |
|            |                    | 2013               |        | 1,824  | (1,511 to 2,251)   | 120.8              | (100.6 to 149.5)   |                    |
|            |                    | Both               | 1990   | 3,549  | (3,153 to 4,153)   | 160.3              | (142.8 to 186.0)   |                    |
|            |                    |                    | 2013   | 3,507  | (3,061 to 4,059)   | 136.6              | (118.8 to 159.6)   |                    |
|            | Deaths             | Hemorrhagic Stroke | Male   | 1990   | 897                | (617 to 1,130)     | 89                 | (60.0 to 113.4)    |
|            |                    |                    |        | 2013   | 1,293              | (1,026 to 1,622)   | 94.4               | (74.3 to 119.0)    |
|            |                    |                    | Female | 1990   | 1,195              | (825 to 1,433)     | 76.6               | (52.1 to 92.1)     |
|            |                    | 2013               |        | 1,252  | (1,011 to 1,621)   | 72.9               | (59.0 to 95.3)     |                    |
|            |                    | Both               | 1990   | 2,092  | (1,568 to 2,433)   | 81.6               | (60.1 to 95.8)     |                    |
|            |                    |                    | 2013   | 2,545  | (2,167 to 3,023)   | 82.5               | (69.9 to 99.3)     |                    |
| DALYs      | Ischemic Stroke    | Male               | 1990   | 25,347 | (19,449 to 32,911) | 2683.9             | (2129.1 to 3360.7) |                    |
|            |                    |                    | 2013   | 33,159 | (26,746 to 40,512) | 2581.4             | (2099.4 to 3141.2) |                    |
|            |                    |                    | Female | 1990   | 29,929             | (24,728 to 37,496) | 1971.3             | (1631.8 to 2448.3) |
|            |                    | 2013               |        | 26,390 | (21,509 to 32,195) | 1625.6             | (1329.6 to 1974.4) |                    |
|            |                    | Both               | 1990   | 55,276 | (48,086 to 67,303) | 2260.6             | (1981.1 to 2702.0) |                    |
|            |                    |                    | 2013   | 59,549 | (51,113 to 68,788) | 2046.5             | (1765.1 to 2358.2) |                    |
|            | Hemorrhagic Stroke | Male               | 1990   | 23,978 | (17,198 to 29,866) | 1987.1             | (1395.6 to 2492.7) |                    |
|            |                    |                    | 2013   | 36,324 | (28,972 to 44,873) | 2186.7             | (1731.9 to 2739.5) |                    |
|            |                    |                    | Female | 1990   | 26,520             | (19,899 to 31,125) | 1640.2             | (1227.0 to 1923.4) |
|            |                    | 2013               |        | 30,008 | (24,189 to 37,267) | 1554.2             | (1263.2 to 1968.7) |                    |
|            |                    | Both               | 1990   | 50,499 | (39,894 to 57,886) | 1787.6             | (1401.1 to 2056.2) |                    |
|            |                    |                    | 2013   | 66,332 | (56,146 to 76,868) | 1842.1             | (1567.4 to 2162.0) |                    |
| YLDs       | Ischemic Stroke    | Male               | 1990   | 99     | (62 to 145)        | 8.6                | (5.5 to 12.4)      |                    |
|            |                    |                    | 2013   | 136    | (86 to 196)        | 8.9                | (5.8 to 12.7)      |                    |
|            |                    | Female             | 1990   | 133    | (80 to 198)        | 8.4                | (5.0 to 12.3)      |                    |

|         |         |                    |        |      |             |                    |        |                    |
|---------|---------|--------------------|--------|------|-------------|--------------------|--------|--------------------|
|         |         |                    |        | 2013 | 152         | (98 to 219)        | 8.1    | (5.1 to 11.5)      |
|         |         |                    | Both   | 1990 | 233         | (150 to 330)       | 8.5    | (5.5 to 12.0)      |
|         |         |                    |        | 2013 | 289         | (193 to 401)       | 8.4    | (5.7 to 11.6)      |
|         |         | Hemorrhagic Stroke | Male   | 1990 | 104         | (66 to 150)        | 7.8    | (5.1 to 11.5)      |
|         |         |                    |        | 2013 | 142         | (89 to 202)        | 7.7    | (4.9 to 11.0)      |
|         |         |                    | Female | 1990 | 75          | (47 to 108)        | 4.5    | (2.8 to 6.5)       |
|         |         |                    |        | 2013 | 97          | (59 to 142)        | 4.7    | (2.8 to 6.9)       |
|         |         |                    | Both   | 1990 | 179         | (121 to 251)       | 5.9    | (4.0 to 8.4)       |
|         |         |                    |        |      | Counts, All | Ages               | Rate   | Per 100,000        |
|         |         |                    |        |      |             |                    | Age-   | standardized       |
| Country | measure | Stroke Type        | sex    | year | Mean        | 95% UI             | Mean   | 95% UI             |
|         |         |                    | Both   | 2013 | 239         | (156 to 335)       | 6.1    | (4.0 to 8.5)       |
| Laos    | Deaths  | Ischemic Stroke    | Male   | 1990 | 557         | (316 to 1,023)     | 90.3   | (53.1 to 156.2)    |
|         |         |                    |        | 2013 | 1,130       | (766 to 1,699)     | 104.7  | (73.4 to 152.3)    |
|         |         |                    | Female | 1990 | 658         | (414 to 1,108)     | 87.8   | (56.9 to 141.6)    |
|         |         |                    |        | 2013 | 1,443       | (793 to 2,101)     | 109.8  | (64.0 to 156.0)    |
|         |         |                    | Both   | 1990 | 1,215       | (758 to 1,941)     | 89.3   | (58.6 to 138.8)    |
|         |         |                    |        | 2013 | 2,574       | (1,738 to 3,631)   | 108    | (74.7 to 146.7)    |
|         | Deaths  | Hemorrhagic Stroke | Male   | 1990 | 775         | (418 to 1,223)     | 88.9   | (40.6 to 143.4)    |
|         |         |                    |        | 2013 | 1,153       | (654 to 1,865)     | 76.7   | (44.5 to 122.3)    |
|         |         |                    | Female | 1990 | 821         | (481 to 1,290)     | 85.4   | (50.5 to 135.3)    |
|         |         |                    |        | 2013 | 1,290       | (744 to 2,019)     | 77.9   | (44.4 to 121.1)    |
|         |         |                    | Both   | 1990 | 1,597       | (992 to 2,420)     | 87.4   | (54.2 to 130.1)    |
|         |         |                    |        | 2013 | 2,443       | (1,446 to 3,789)   | 77.7   | (48.8 to 117.5)    |
|         | DALYs   | Ischemic Stroke    | Male   | 1990 | 12,836      | (7,512 to 23,556)  | 1492.4 | (859.3 to 2746.4)  |
|         |         |                    |        | 2013 | 22,154      | (14,331 to 35,139) | 1603.6 | (1076.9 to 2449.5) |
|         |         |                    | Female | 1990 | 12,870      | (7,381 to 22,065)  | 1332.7 | (821.4 to 2279.9)  |

|         |         |                    |        |      |             |                     |        |                    |
|---------|---------|--------------------|--------|------|-------------|---------------------|--------|--------------------|
|         |         |                    |        | 2013 | 23,860      | (11,917 to 37,093)  | 1525.1 | (811.4 to 2261.8)  |
|         |         |                    | Both   | 1990 | 25,707      | (15,454 to 41,328)  | 1410.5 | (876.6 to 2259.9)  |
|         |         |                    |        | 2013 | 46,015      | (29,662 to 69,108)  | 1566.8 | (1051.4 to 2269.8) |
|         |         | Hemorrhagic Stroke | Male   | 1990 | 26,948      | (15,355 to 41,025)  | 2164.3 | (1158.0 to 3413.5) |
|         |         |                    |        | 2013 | 36,875      | (21,137 to 59,752)  | 1829.8 | (1042.3 to 2978.6) |
|         |         |                    | Female | 1990 | 24,521      | (13,988 to 38,043)  | 1914.4 | (1115.7 to 3013.2) |
|         |         |                    |        | 2013 | 35,142      | (18,730 to 56,379)  | 1686   | (933.5 to 2671.1)  |
|         |         |                    | Both   | 1990 | 51,469      | (31,624 to 77,259)  | 2038.5 | (1236.1 to 3101.1) |
|         |         |                    |        | 2013 | 72,018      | (42,385 to 111,807) | 1759.5 | (1039.4 to 2753.1) |
|         | YLDs    | Ischemic Stroke    | Male   | 1990 | 214         | (138 to 301)        | 27.9   | (18.1 to 39.0)     |
|         |         |                    |        | 2013 | 375         | (238 to 543)        | 27     | (16.4 to 39.4)     |
|         |         |                    | Female | 1990 | 200         | (128 to 280)        | 21.2   | (14.0 to 29.5)     |
|         |         |                    |        | 2013 | 385         | (253 to 548)        | 23.8   | (15.6 to 34.2)     |
|         |         |                    | Both   | 1990 | 414         | (276 to 573)        | 24.1   | (16.2 to 32.7)     |
|         |         |                    |        | 2013 | 760         | (523 to 1,063)      | 25.3   | (17.2 to 35.5)     |
|         |         | Hemorrhagic Stroke | Male   | 1990 | 265         | (175 to 376)        | 30.6   | (20.4 to 43.4)     |
|         |         |                    |        | 2013 | 456         | (293 to 647)        | 28.8   | (18.6 to 41.1)     |
|         |         |                    | Female | 1990 | 215         | (138 to 301)        | 21     | (13.8 to 29.2)     |
|         |         |                    |        | 2013 | 401         | (257 to 564)        | 22.7   | (14.3 to 32.0)     |
|         |         |                    | Both   | 1990 | 480         | (324 to 657)        | 25.3   | (17.3 to 34.1)     |
|         |         |                    | Both   | 2013 | 857         | (572 to 1,171)      | 25.5   | (17.0 to 35.0)     |
| Latvia  | Deaths  | Ischemic Stroke    | Male   | 1990 | 1,538       | (1,268 to 1,859)    | 158.2  | (131.1 to 190.3)   |
|         |         |                    |        |      | Counts, All | Ages                | Rate   | Per 100,000        |
|         |         |                    |        |      |             |                     | Age-   | standardized       |
| Country | measure | Stroke Type        | sex    | year | Mean        | 95% UI              | Mean   | 95% UI             |
|         |         |                    |        | 2013 | 1,419       | (1,174 to 1,650)    | 118.8  | (98.5 to 138.3)    |

|  |        |                    |        |      |        |                    |        |                    |
|--|--------|--------------------|--------|------|--------|--------------------|--------|--------------------|
|  |        |                    | Female | 1990 | 3,088  | (2,621 to 3,716)   | 134.1  | (113.9 to 162.0)   |
|  |        |                    |        | 2013 | 2,532  | (2,113 to 2,995)   | 83.7   | (69.9 to 98.3)     |
|  |        |                    | Both   | 1990 | 4,627  | (4,101 to 5,356)   | 142.9  | (126.8 to 165.7)   |
|  |        |                    |        | 2013 | 3,952  | (3,429 to 4,406)   | 96.4   | (83.5 to 107.3)    |
|  | Deaths | Hemorrhagic Stroke | Male   | 1990 | 803    | (540 to 1,097)     | 74.4   | (49.1 to 103.6)    |
|  |        |                    |        | 2013 | 486    | (370 to 667)       | 40.4   | (30.8 to 55.6)     |
|  |        |                    | Female | 1990 | 1,405  | (880 to 1,738)     | 64.1   | (40.8 to 79.0)     |
|  |        |                    |        | 2013 | 635    | (465 to 1,121)     | 24.5   | (18.7 to 40.3)     |
|  |        |                    | Both   | 1990 | 2,208  | (1,531 to 2,733)   | 68.5   | (47.6 to 85.0)     |
|  |        |                    |        | 2013 | 1,122  | (884 to 1,646)     | 30.6   | (24.6 to 43.4)     |
|  | DALYs  | Ischemic Stroke    | Male   | 1990 | 23,850 | (19,195 to 29,410) | 2253   | (1844.3 to 2747.8) |
|  |        |                    |        | 2013 | 20,913 | (17,055 to 24,194) | 1696.5 | (1380.4 to 1963.0) |
|  |        |                    | Female | 1990 | 35,993 | (30,437 to 43,478) | 1632.2 | (1383.3 to 1981.0) |
|  |        |                    |        | 2013 | 25,057 | (20,852 to 29,501) | 938.2  | (781.8 to 1121.6)  |
|  |        |                    | Both   | 1990 | 59,844 | (52,314 to 69,297) | 1858.9 | (1626.3 to 2151.0) |
|  |        |                    |        | 2013 | 45,970 | (40,012 to 51,205) | 1223.1 | (1061.0 to 1362.4) |
|  |        | Hemorrhagic Stroke | Male   | 1990 | 17,261 | (12,017 to 22,619) | 1444.4 | (997.7 to 1927.0)  |
|  |        |                    |        | 2013 | 9,771  | (7,621 to 12,954)  | 804.1  | (630.1 to 1061.0)  |
|  |        |                    | Female | 1990 | 22,025 | (14,845 to 26,224) | 1084   | (743.4 to 1293.6)  |
|  |        |                    |        | 2013 | 8,652  | (6,783 to 13,532)  | 414.5  | (332.6 to 623.6)   |
|  |        |                    | Both   | 1990 | 39,287 | (29,092 to 48,189) | 1233.4 | (916.5 to 1506.7)  |
|  |        |                    |        | 2013 | 18,424 | (15,325 to 24,781) | 575.3  | (483.1 to 749.0)   |
|  | YLDs   | Ischemic Stroke    | Male   | 1990 | 437    | (273 to 628)       | 35.6   | (22.5 to 50.4)     |
|  |        |                    |        | 2013 | 525    | (328 to 760)       | 43.9   | (27.9 to 63.4)     |
|  |        |                    | Female | 1990 | 481    | (310 to 668)       | 25     | (16.2 to 34.6)     |
|  |        |                    |        | 2013 | 461    | (293 to 669)       | 24.1   | (15.2 to 34.7)     |
|  |        |                    | Both   | 1990 | 918    | (604 to 1,246)     | 29.4   | (19.4 to 40.0)     |

|                  |         |                    |        |      |        |                   |                              |                             |
|------------------|---------|--------------------|--------|------|--------|-------------------|------------------------------|-----------------------------|
|                  |         |                    |        | 2013 | 987    | (650 to 1,356)    | 32.3                         | (21.0 to 44.4)              |
|                  |         | Hemorrhagic Stroke | Male   | 1990 | 28     | (14 to 48)        | 2.3                          | (1.2 to 3.8)                |
|                  |         |                    |        | 2013 | 29     | (13 to 53)        | 2.5                          | (1.2 to 4.6)                |
|                  |         |                    | Female | 1990 | 28     | (16 to 46)        | 1.6                          | (0.9 to 2.6)                |
|                  |         |                    |        | 2013 | 28     | (15 to 50)        | 1.7                          | (0.9 to 3.0)                |
|                  |         |                    | Both   | 1990 | 56     | (33 to 87)        | 1.9                          | (1.1 to 2.9)                |
|                  |         |                    | Both   | 2013 | 57     | (33 to 90)        | 2.1                          | (1.2 to 3.2)                |
| Lebanon          | Deaths  | Ischemic Stroke    | Male   | 1990 | 234    | (155 to 336)      | 37.4                         | (25.0 to 52.5)              |
|                  |         |                    |        | 2013 | 199    | (49 to 334)       | 11.7                         | (2.9 to 19.6)               |
|                  |         |                    | Female | 1990 | 559    | (323 to 782)      | 73.8                         | (43.4 to 100.9)             |
|                  |         |                    |        | 2013 | 975    | (260 to 1,429)    | 49.1                         | (13.0 to 72.3)              |
| Counts, All Ages |         |                    |        |      |        |                   |                              |                             |
|                  |         |                    |        |      |        |                   | Rate<br>Age-<br>standardized | Per 100,000<br>standardized |
| Country          | measure | Stroke Type        | sex    | year | Mean   | 95% UI            | Mean                         | 95% UI                      |
|                  |         |                    | Both   | 1990 | 793    | (532 to 1,035)    | 56.8                         | (38.6 to 73.6)              |
|                  |         |                    |        | 2013 | 1,174  | (351 to 1,639)    | 31.6                         | (9.4 to 44.2)               |
|                  | Deaths  | Hemorrhagic Stroke | Male   | 1990 | 216    | (136 to 317)      | 29                           | (17.2 to 43.4)              |
|                  |         |                    |        | 2013 | 160    | (70 to 353)       | 8.8                          | (3.6 to 19.8)               |
|                  |         |                    | Female | 1990 | 532    | (249 to 778)      | 62.5                         | (28.9 to 93.1)              |
|                  |         |                    |        | 2013 | 736    | (130 to 1,306)    | 36.5                         | (6.4 to 65.1)               |
|                  |         |                    | Both   | 1990 | 748    | (434 to 1,007)    | 46.6                         | (26.4 to 63.5)              |
|                  |         |                    |        | 2013 | 897    | (257 to 1,500)    | 23.2                         | (6.5 to 39.0)               |
|                  | DALYs   | Ischemic Stroke    | Male   | 1990 | 3,766  | (2,439 to 5,524)  | 482.1                        | (318.5 to 693.1)            |
|                  |         |                    |        | 2013 | 2,641  | (702 to 4,714)    | 134.4                        | (36.5 to 236.1)             |
|                  |         |                    | Female | 1990 | 8,690  | (4,630 to 12,509) | 1000.8                       | (553.1 to 1425.0)           |
|                  |         |                    |        | 2013 | 11,594 | (2,940 to 17,185) | 559.6                        | (142.3 to 832.0)            |
|                  |         |                    | Both   | 1990 | 12,456 | (7,893 to 16,665) | 750.6                        | (492.6 to 986.4)            |



| Country | measure | Stroke Type        | sex    | year | Age- standardized |                    |        |                    |
|---------|---------|--------------------|--------|------|-------------------|--------------------|--------|--------------------|
|         |         |                    |        |      | Mean              | 95% UI             | Mean   | 95% UI             |
|         | Deaths  | Hemorrhagic Stroke | Male   | 1990 | 237               | (164 to 326)       | 80     | (54.4 to 112.3)    |
|         |         |                    |        | 2013 | 405               | (295 to 556)       | 101.7  | (73.2 to 142.4)    |
|         |         |                    | Female | 1990 | 239               | (158 to 315)       | 63.2   | (41.4 to 84.7)     |
|         |         |                    |        | 2013 | 345               | (231 to 620)       | 58.9   | (38.6 to 105.2)    |
|         |         |                    | Both   | 1990 | 476               | (350 to 586)       | 70.4   | (50.6 to 88.1)     |
|         |         |                    |        | 2013 | 750               | (570 to 1,063)     | 75.8   | (56.8 to 108.9)    |
|         | DALYs   | Ischemic Stroke    | Male   | 1990 | 3,045             | (1,501 to 4,409)   | 971.1  | (490.0 to 1392.7)  |
|         |         |                    |        | 2013 | 5,583             | (3,299 to 7,914)   | 1447   | (873.4 to 2012.7)  |
|         |         |                    | Female | 1990 | 2,874             | (1,531 to 4,322)   | 711.7  | (381.6 to 1044.7)  |
|         |         |                    |        | 2013 | 4,832             | (2,680 to 8,092)   | 837.3  | (463.0 to 1376.4)  |
|         |         |                    | Both   | 1990 | 5,919             | (3,849 to 8,140)   | 823.4  | (540.9 to 1115.2)  |
|         |         |                    |        | 2013 | 10,415            | (7,323 to 13,711)  | 1078.7 | (758.6 to 1425.9)  |
|         |         | Hemorrhagic Stroke | Male   | 1990 | 5,827             | (4,109 to 7,830)   | 1583.7 | (1103.1 to 2152.1) |
|         |         |                    |        | 2013 | 11,475            | (8,477 to 15,274)  | 2293.2 | (1657.2 to 3130.6) |
|         |         |                    | Female | 1990 | 5,170             | (3,444 to 6,781)   | 1121.3 | (737.5 to 1484.7)  |
|         |         |                    |        | 2013 | 8,910             | (5,872 to 15,301)  | 1250.9 | (837.5 to 2192.0)  |
|         |         |                    | Both   | 1990 | 10,997            | (8,345 to 13,475)  | 1322.7 | (981.9 to 1623.7)  |
|         |         |                    |        | 2013 | 20,385            | (15,627 to 28,552) | 1671.6 | (1281.9 to 2348.7) |
|         | YLDs    | Ischemic Stroke    | Male   | 1990 | 69                | (46 to 98)         | 19.5   | (13.1 to 27.7)     |
|         |         |                    |        | 2013 | 84                | (53 to 117)        | 19.2   | (12.2 to 26.6)     |
|         |         |                    | Female | 1990 | 88                | (56 to 127)        | 19.1   | (12.1 to 27.1)     |
|         |         |                    |        | 2013 | 114               | (73 to 164)        | 18.7   | (11.9 to 27.1)     |
|         |         |                    | Both   | 1990 | 158               | (107 to 218)       | 19.3   | (13.0 to 26.6)     |
|         |         |                    |        | 2013 | 198               | (130 to 272)       | 18.9   | (12.5 to 26.1)     |
|         |         | Hemorrhagic        | Male   | 1990 | 20                | (12 to 30)         | 5.2    | (3.2 to 7.8)       |

|         |         | Stroke             |        |      |                  |                    |                  |                    |
|---------|---------|--------------------|--------|------|------------------|--------------------|------------------|--------------------|
|         |         |                    |        | 2013 | 27               | (17 to 39)         | 5.3              | (3.3 to 7.6)       |
|         |         |                    | Female | 1990 | 23               | (14 to 35)         | 4.7              | (3.0 to 7.0)       |
|         |         |                    |        | 2013 | 29               | (17 to 42)         | 4.4              | (2.6 to 6.5)       |
|         |         |                    | Both   | 1990 | 44               | (28 to 62)         | 4.9              | (3.2 to 6.9)       |
|         |         |                    | Both   | 2013 | 56               | (36 to 78)         | 4.7              | (3.0 to 6.7)       |
| Liberia | Deaths  | Ischemic Stroke    | Male   | 1990 | 193              | (136 to 258)       | 71.4             | (49.5 to 94.2)     |
|         |         |                    |        | 2013 | 673              | (370 to 914)       | 122.3            | (71.0 to 159.7)    |
|         |         |                    | Female | 1990 | 245              | (187 to 370)       | 85.4             | (65.5 to 127.9)    |
|         |         |                    |        | 2013 | 791              | (524 to 1,115)     | 128.3            | (87.9 to 179.8)    |
|         |         |                    | Both   | 1990 | 439              | (361 to 564)       | 78.8             | (65.1 to 101.1)    |
|         |         |                    |        | 2013 | 1,465            | (1,045 to 1,796)   | 125.7            | (92.2 to 153.1)    |
|         | Deaths  | Hemorrhagic Stroke | Male   | 1990 | 229              | (147 to 302)       | 55.9             | (32.7 to 76.0)     |
|         |         |                    |        | 2013 | 475              | (290 to 758)       | 63.4             | (36.4 to 109.4)    |
|         |         |                    |        |      | Counts, All Ages |                    | Rate Per 100,000 |                    |
| Country | measure | Stroke Type        | sex    | year | Mean             | 95% UI             | Mean             | 95% UI             |
|         |         |                    | Female | 1990 | 251              | (184 to 351)       | 62.9             | (44.5 to 90.0)     |
|         |         |                    |        | 2013 | 481              | (299 to 929)       | 60.1             | (36.0 to 124.4)    |
|         |         |                    | Both   | 1990 | 480              | (362 to 581)       | 59.7             | (42.6 to 72.8)     |
|         |         |                    |        | 2013 | 957              | (679 to 1,580)     | 61.7             | (41.3 to 109.3)    |
|         | DALYs   | Ischemic Stroke    | Male   | 1990 | 4,704            | (3,283 to 6,433)   | 1129.9           | (795.2 to 1513.0)  |
|         |         |                    |        | 2013 | 13,961           | (7,421 to 19,685)  | 1894.8           | (1044.7 to 2569.0) |
|         |         |                    | Female | 1990 | 5,523            | (3,958 to 8,933)   | 1299.9           | (994.4 to 1949.6)  |
|         |         |                    |        | 2013 | 14,955           | (9,484 to 21,912)  | 1897.2           | (1258.1 to 2682.5) |
|         |         |                    | Both   | 1990 | 10,228           | (8,162 to 13,919)  | 1219.8           | (1002.5 to 1565.0) |
|         |         |                    |        | 2013 | 28,916           | (20,615 to 36,178) | 1899.4           | (1351.7 to 2333.2) |
|         |         | Hemorrhagic        | Male   | 1990 | 8,967            | (6,005 to 12,249)  | 1247             | (779.0 to 1645.0)  |



|       |        |                    |        |      |        |                    |        |                   |
|-------|--------|--------------------|--------|------|--------|--------------------|--------|-------------------|
|       |        | Stroke             |        |      |        |                    |        |                   |
|       |        |                    |        | 2013 | 14,545 | (9,442 to 21,183)  | 1337   | (820.7 to 2128.8) |
|       |        |                    | Female | 1990 | 8,405  | (5,817 to 12,261)  | 1301.1 | (957.5 to 1814.8) |
|       |        |                    |        | 2013 | 13,113 | (8,474 to 24,450)  | 1218   | (765.8 to 2338.9) |
|       |        |                    | Both   | 1990 | 17,372 | (12,559 to 22,074) | 1277.3 | (959.8 to 1540.2) |
|       |        |                    |        | 2013 | 27,659 | (20,629 to 42,420) | 1276.7 | (909.7 to 2090.4) |
|       | YLDs   | Ischemic Stroke    | Male   | 1990 | 72     | (46 to 107)        | 15.8   | (10.4 to 23.1)    |
|       |        |                    |        | 2013 | 144    | (93 to 205)        | 15.2   | (9.8 to 21.7)     |
|       |        |                    | Female | 1990 | 57     | (36 to 84)         | 11.5   | (7.5 to 16.7)     |
|       |        |                    |        | 2013 | 122    | (78 to 174)        | 11.7   | (7.6 to 16.7)     |
|       |        |                    | Both   | 1990 | 130    | (87 to 186)        | 13.6   | (9.2 to 19.2)     |
|       |        |                    |        | 2013 | 266    | (181 to 366)       | 13.3   | (9.1 to 18.4)     |
|       |        | Hemorrhagic Stroke | Male   | 1990 | 22     | (14 to 33)         | 4.2    | (2.6 to 6.1)      |
|       |        |                    |        | 2013 | 45     | (28 to 65)         | 3.9    | (2.5 to 5.7)      |
|       |        |                    | Female | 1990 | 16     | (10 to 24)         | 2.9    | (1.8 to 4.2)      |
|       |        |                    |        | 2013 | 34     | (21 to 50)         | 2.8    | (1.8 to 4.2)      |
|       |        |                    | Both   | 1990 | 39     | (25 to 57)         | 3.5    | (2.4 to 5.0)      |
|       |        |                    | Both   | 2013 | 79     | (51 to 112)        | 3.3    | (2.2 to 4.7)      |
| Libya | Deaths | Ischemic Stroke    | Male   | 1990 | 362    | (256 to 491)       | 66.6   | (48.8 to 88.3)    |
|       |        |                    |        | 2013 | 862    | (616 to 1,185)     | 69.7   | (49.7 to 94.1)    |
|       |        |                    | Female | 1990 | 455    | (337 to 588)       | 79.6   | (59.2 to 101.5)   |
|       |        |                    |        | 2013 | 1,149  | (773 to 1,518)     | 76.9   | (52.0 to 101.3)   |
|       |        |                    | Both   | 1990 | 817    | (649 to 1,000)     | 73.4   | (59.4 to 88.9)    |
|       |        |                    |        | 2013 | 2,012  | (1,558 to 2,464)   | 73.8   | (57.2 to 90.5)    |
|       | Deaths | Hemorrhagic Stroke | Male   | 1990 | 464    | (342 to 634)       | 49.7   | (34.9 to 68.8)    |
|       |        |                    |        | 2013 | 705    | (474 to 976)       | 46.3   | (29.9 to 64.8)    |
|       |        |                    | Female | 1990 | 571    | (411 to 731)       | 66.3   | (47.2 to 86.6)    |

| Country | measure | Stroke Type        | sex    | year | Counts, All<br>Mean | Ages<br>95% UI     | Rate<br>Age-<br>standardized<br>Mean | Per 100,000<br>standardized<br>95% UI |
|---------|---------|--------------------|--------|------|---------------------|--------------------|--------------------------------------|---------------------------------------|
|         |         |                    |        | 2013 | 960                 | (662 to 1,316)     | 56.4                                 | (38.2 to 77.7)                        |
|         |         |                    | Both   | 1990 | 1,035               | (819 to 1,271)     | 58.1                                 | (45.5 to 73.0)                        |
|         |         |                    |        | 2013 | 1,665               | (1,272 to 2,166)   | 51.9                                 | (38.9 to 68.3)                        |
|         | DALYs   | Ischemic Stroke    | Male   | 1990 | 7,577               | (5,093 to 11,063)  | 876.6                                | (622.2 to 1193.4)                     |
|         |         |                    |        | 2013 | 13,519              | (9,558 to 19,051)  | 887.4                                | (632.8 to 1231.3)                     |
|         |         |                    | Female | 1990 | 8,775               | (5,935 to 12,565)  | 1046.3                               | (754.9 to 1364.9)                     |
|         |         |                    |        | 2013 | 15,792              | (10,601 to 21,029) | 928                                  | (619.0 to 1237.2)                     |
|         |         |                    | Both   | 1990 | 16,352              | (12,314 to 21,221) | 961.2                                | (760.5 to 1180.8)                     |
|         |         |                    |        | 2013 | 29,311              | (22,395 to 36,395) | 910.3                                | (702.2 to 1125.1)                     |
|         |         | Hemorrhagic Stroke | Male   | 1990 | 20,875              | (14,799 to 29,401) | 1141.9                               | (841.0 to 1561.5)                     |
|         |         |                    |        | 2013 | 18,698              | (13,648 to 25,446) | 874                                  | (612.9 to 1198.0)                     |
|         |         |                    | Female | 1990 | 22,937              | (15,133 to 31,302) | 1461.5                               | (1056.9 to 1885.6)                    |
|         |         |                    |        | 2013 | 21,972              | (15,322 to 29,915) | 1008.6                               | (705.2 to 1388.0)                     |
|         |         |                    | Both   | 1990 | 43,813              | (33,945 to 55,185) | 1294.4                               | (1027.0 to 1588.0)                    |
|         |         |                    |        | 2013 | 40,671              | (32,273 to 51,090) | 945.2                                | (737.4 to 1204.1)                     |
|         | YLDs    | Ischemic Stroke    | Male   | 1990 | 26                  | (16 to 41)         | 2.5                                  | (1.5 to 3.9)                          |
|         |         |                    |        | 2013 | 43                  | (27 to 64)         | 2.2                                  | (1.4 to 3.2)                          |
|         |         |                    | Female | 1990 | 18                  | (10 to 28)         | 1.9                                  | (1.2 to 3.0)                          |
|         |         |                    |        | 2013 | 38                  | (23 to 59)         | 1.9                                  | (1.1 to 2.8)                          |
|         |         |                    | Both   | 1990 | 44                  | (28 to 66)         | 2.2                                  | (1.4 to 3.3)                          |
|         |         |                    |        | 2013 | 82                  | (52 to 118)        | 2                                    | (1.3 to 3.0)                          |
|         |         | Hemorrhagic Stroke | Male   | 1990 | 4                   | (2 to 6)           | 0.3                                  | (0.2 to 0.5)                          |
|         |         |                    |        | 2013 | 6                   | (3 to 10)          | 0.3                                  | (0.2 to 0.5)                          |
|         |         |                    | Female | 1990 | 4                   | (2 to 7)           | 0.4                                  | (0.2 to 0.7)                          |

|           |         |                    |        |             |        |                    |        |                    |
|-----------|---------|--------------------|--------|-------------|--------|--------------------|--------|--------------------|
|           |         |                    |        | 2013        | 6      | (3 to 9)           | 0.3    | (0.2 to 0.4)       |
|           |         |                    | Both   | 1990        | 8      | (4 to 13)          | 0.4    | (0.2 to 0.6)       |
|           |         |                    | Both   | 2013        | 12     | (7 to 18)          | 0.3    | (0.2 to 0.4)       |
| Lithuania | Deaths  | Ischemic Stroke    | Male   | 1990        | 1,307  | (1,065 to 1,626)   | 90.3   | (73.8 to 112.2)    |
|           |         |                    |        | 2013        | 1,362  | (1,092 to 1,623)   | 73.8   | (59.2 to 87.9)     |
|           |         |                    | Female | 1990        | 2,240  | (1,961 to 2,932)   | 81.6   | (71.6 to 106.3)    |
|           |         |                    |        | 2013        | 2,774  | (1,988 to 3,208)   | 64.4   | (47.1 to 73.8)     |
|           |         |                    | Both   | 1990        | 3,547  | (3,145 to 4,339)   | 85.2   | (75.8 to 103.9)    |
|           |         |                    |        | 2013        | 4,137  | (3,274 to 4,667)   | 69     | (55.0 to 77.6)     |
|           | Deaths  | Hemorrhagic Stroke | Male   | 1990        | 507    | (344 to 685)       | 31.9   | (21.5 to 43.3)     |
|           |         |                    |        | 2013        | 415    | (298 to 546)       | 23.1   | (16.6 to 30.2)     |
|           |         |                    | Female | 1990        | 736    | (488 to 903)       | 28.4   | (19.3 to 34.6)     |
|           |         |                    |        | 2013        | 642    | (483 to 911)       | 18.2   | (14.4 to 25.2)     |
|           |         |                    | Both   | 1990        | 1,244  | (909 to 1,486)     | 30.1   | (22.1 to 36.0)     |
|           |         |                    |        | 2013        | 1,057  | (846 to 1,379)     | 20.5   | (16.8 to 26.1)     |
|           | DALYs   | Ischemic Stroke    | Male   | 1990        | 20,653 | (16,759 to 25,583) | 1362   | (1119.3 to 1676.2) |
|           |         |                    |        | 2013        | 20,456 | (16,498 to 24,307) | 1112.5 | (895.0 to 1320.4)  |
|           |         |                    |        | Counts, All |        | Ages               | Rate   | Per 100,000        |
|           |         |                    |        |             |        |                    | Age-   | standardized       |
| Country   | measure | Stroke Type        | sex    | year        | Mean   | 95% UI             | Mean   | 95% UI             |
|           |         |                    | Female | 1990        | 27,570 | (24,371 to 35,450) | 1049.4 | (924.0 to 1349.9)  |
|           |         |                    |        | 2013        | 27,707 | (20,947 to 31,442) | 737.7  | (564.1 to 839.6)   |
|           |         |                    | Both   | 1990        | 48,224 | (42,800 to 58,354) | 1176.5 | (1045.2 to 1421.0) |
|           |         |                    |        | 2013        | 48,163 | (39,200 to 53,850) | 894.7  | (735.7 to 1003.6)  |
|           |         | Hemorrhagic Stroke | Male   | 1990        | 12,406 | (8,807 to 16,367)  | 732    | (519.5 to 970.5)   |
|           |         |                    |        | 2013        | 9,321  | (6,794 to 11,961)  | 530.1  | (385.7 to 677.2)   |
|           |         |                    | Female | 1990        | 13,966 | (9,558 to 17,053)  | 574.5  | (397.6 to 698.1)   |

|            |        |                    |        |      |        |                    |       |                  |
|------------|--------|--------------------|--------|------|--------|--------------------|-------|------------------|
|            |        |                    |        | 2013 | 9,625  | (7,764 to 13,114)  | 344.6 | (281.7 to 452.2) |
|            |        |                    | Both   | 1990 | 26,372 | (20,061 to 31,331) | 646.5 | (494.8 to 769.0) |
|            |        |                    |        | 2013 | 18,947 | (15,669 to 23,266) | 428.7 | (355.9 to 520.4) |
|            | YLDs   | Ischemic Stroke    | Male   | 1990 | 502    | (319 to 724)       | 29.9  | (19.1 to 43.1)   |
|            |        |                    |        | 2013 | 603    | (380 to 870)       | 34.3  | (21.7 to 49.4)   |
|            |        |                    | Female | 1990 | 491    | (322 to 699)       | 20.3  | (13.4 to 29.0)   |
|            |        |                    |        | 2013 | 558    | (366 to 810)       | 20.2  | (13.2 to 29.4)   |
|            |        |                    | Both   | 1990 | 993    | (675 to 1,375)     | 24.3  | (16.6 to 33.8)   |
|            |        |                    |        | 2013 | 1,161  | (801 to 1,610)     | 26.2  | (18.0 to 36.0)   |
|            |        | Hemorrhagic Stroke | Male   | 1990 | 36     | (19 to 62)         | 2.1   | (1.1 to 3.6)     |
|            |        |                    |        | 2013 | 32     | (17 to 60)         | 2     | (1.1 to 3.5)     |
|            |        |                    | Female | 1990 | 30     | (18 to 49)         | 1.3   | (0.8 to 2.1)     |
|            |        |                    |        | 2013 | 37     | (20 to 66)         | 1.5   | (0.8 to 2.8)     |
|            |        |                    | Both   | 1990 | 66     | (40 to 102)        | 1.7   | (1.0 to 2.5)     |
|            |        |                    | Both   | 2013 | 69     | (42 to 111)        | 1.7   | (1.1 to 2.8)     |
| Luxembourg | Deaths | Ischemic Stroke    | Male   | 1990 | 133    | (102 to 161)       | 74.7  | (57.0 to 89.9)   |
|            |        |                    |        | 2013 | 97     | (73 to 127)        | 28    | (21.0 to 36.6)   |
|            |        |                    | Female | 1990 | 232    | (153 to 268)       | 68.3  | (45.1 to 78.7)   |
|            |        |                    |        | 2013 | 149    | (105 to 243)       | 26    | (18.5 to 42.8)   |
|            |        |                    | Both   | 1990 | 366    | (275 to 415)       | 71.1  | (53.4 to 80.6)   |
|            |        |                    |        | 2013 | 246    | (193 to 358)       | 27    | (21.3 to 39.1)   |
|            | Deaths | Hemorrhagic Stroke | Male   | 1990 | 85     | (68 to 115)        | 45.6  | (35.7 to 62.5)   |
|            |        |                    |        | 2013 | 90     | (61 to 114)        | 26.2  | (17.9 to 33.2)   |
|            |        |                    | Female | 1990 | 135    | (99 to 170)        | 42.1  | (31.4 to 52.7)   |
|            |        |                    |        | 2013 | 111    | (79 to 161)        | 21    | (15.2 to 31.1)   |
|            |        |                    | Both   | 1990 | 221    | (187 to 273)       | 43.8  | (37.2 to 54.0)   |
|            |        |                    |        | 2013 | 201    | (152 to 249)       | 23.4  | (17.9 to 28.9)   |

|                  |         |                       |        |      |       |                  |                                      |                                       |
|------------------|---------|-----------------------|--------|------|-------|------------------|--------------------------------------|---------------------------------------|
|                  | DALYs   | Ischemic Stroke       | Male   | 1990 | 1,932 | (1,503 to 2,306) | 1007.9                               | (784.9 to 1202.2)                     |
|                  |         |                       |        | 2013 | 1,353 | (1,064 to 1,716) | 397                                  | (312.4 to 503.2)                      |
|                  |         |                       | Female | 1990 | 2,572 | (1,767 to 2,937) | 805.7                                | (553.6 to 919.1)                      |
|                  |         |                       |        | 2013 | 1,461 | (1,097 to 2,247) | 302.5                                | (229.2 to 471.6)                      |
|                  |         |                       | Both   | 1990 | 4,504 | (3,519 to 5,055) | 888.1                                | (693.5 to 999.1)                      |
| Counts, All Ages |         |                       |        |      |       |                  |                                      |                                       |
| Country          | measure | Stroke Type           | sex    | year | Mean  | 95% UI           | Rate<br>Age-<br>standardized<br>Mean | Per 100,000<br>standardized<br>95% UI |
|                  |         |                       |        | 2013 | 2,815 | (2,272 to 3,848) | 346.3                                | (280.8 to 473.2)                      |
|                  |         | Hemorrhagic<br>Stroke | Male   | 1990 | 1,587 | (1,277 to 2,033) | 787.1                                | (639.5 to 1013.9)                     |
|                  |         |                       |        | 2013 | 1,340 | (959 to 1,672)   | 396.1                                | (283.3 to 494.6)                      |
|                  |         |                       | Female | 1990 | 1,883 | (1,420 to 2,284) | 659.5                                | (494.0 to 793.7)                      |
|                  |         |                       |        | 2013 | 1,208 | (877 to 1,798)   | 280.8                                | (200.6 to 425.1)                      |
|                  |         |                       | Both   | 1990 | 3,470 | (3,013 to 4,108) | 716.4                                | (620.3 to 845.7)                      |
|                  |         |                       |        | 2013 | 2,548 | (2,030 to 3,059) | 335.3                                | (265.6 to 402.1)                      |
|                  | YLDs    | Ischemic Stroke       | Male   | 1990 | 174   | (117 to 244)     | 86.7                                 | (58.1 to 121.3)                       |
|                  |         |                       |        | 2013 | 309   | (207 to 429)     | 91.5                                 | (61.3 to 126.4)                       |
|                  |         |                       | Female | 1990 | 175   | (111 to 248)     | 59.9                                 | (38.9 to 85.6)                        |
|                  |         |                       |        | 2013 | 252   | (170 to 348)     | 61.1                                 | (41.0 to 85.0)                        |
|                  |         |                       | Both   | 1990 | 349   | (238 to 478)     | 70.8                                 | (48.5 to 96.9)                        |
|                  |         |                       |        | 2013 | 562   | (385 to 761)     | 75.1                                 | (51.1 to 101.3)                       |
|                  |         | Hemorrhagic<br>Stroke | Male   | 1990 | 33    | (18 to 56)       | 16.5                                 | (8.8 to 27.9)                         |
|                  |         |                       |        | 2013 | 57    | (31 to 96)       | 17.1                                 | (9.4 to 29.0)                         |
|                  |         |                       | Female | 1990 | 33    | (18 to 55)       | 12.4                                 | (6.8 to 19.8)                         |
|                  |         |                       |        | 2013 | 50    | (27 to 83)       | 12.9                                 | (7.3 to 21.8)                         |
|                  |         |                       | Both   | 1990 | 67    | (41 to 105)      | 14.1                                 | (8.6 to 21.7)                         |
|                  |         |                       | Both   | 2013 | 107   | (67 to 165)      | 14.8                                 | (9.3 to 22.6)                         |

| Macedonia | Deaths  | Ischemic Stroke    | Male   | 1990 | 1,364            | (1,209 to 1,508)   | 228.9            | (203.6 to 252.2)   |
|-----------|---------|--------------------|--------|------|------------------|--------------------|------------------|--------------------|
|           |         |                    |        | 2013 | 1,952            | (1,657 to 2,226)   | 193.3            | (164.9 to 221.0)   |
|           |         |                    | Female | 1990 | 1,231            | (1,089 to 1,395)   | 183.8            | (163.0 to 208.8)   |
|           |         |                    |        | 2013 | 2,165            | (1,737 to 2,453)   | 158.1            | (126.3 to 178.6)   |
|           |         |                    | Both   | 1990 | 2,596            | (2,394 to 2,786)   | 204.8            | (189.3 to 219.7)   |
|           |         |                    |        | 2013 | 4,117            | (3,593 to 4,487)   | 173.6            | (151.6 to 189.3)   |
|           | Deaths  | Hemorrhagic Stroke | Male   | 1990 | 464              | (386 to 561)       | 60.1             | (49.2 to 73.8)     |
|           |         |                    |        | 2013 | 548              | (425 to 693)       | 47.5             | (36.7 to 61.1)     |
|           |         |                    | Female | 1990 | 527              | (450 to 648)       | 62.2             | (52.3 to 77.4)     |
|           |         |                    |        | 2013 | 674              | (520 to 839)       | 48.5             | (37.5 to 60.7)     |
|           |         |                    | Both   | 1990 | 991              | (869 to 1,146)     | 61.3             | (53.2 to 71.8)     |
|           |         |                    |        | 2013 | 1,223            | (1,027 to 1,454)   | 48.2             | (40.5 to 58.0)     |
|           | DALYs   | Ischemic Stroke    | Male   | 1990 | 19,320           | (16,803 to 21,661) | 2836.6           | (2500.1 to 3152.7) |
|           |         |                    |        | 2013 | 25,812           | (21,623 to 29,496) | 2321.3           | (1958.2 to 2644.3) |
|           |         |                    | Female | 1990 | 15,581           | (13,690 to 18,038) | 2102.3           | (1870.1 to 2404.7) |
|           |         |                    |        | 2013 | 23,636           | (19,009 to 26,912) | 1676.8           | (1340.6 to 1907.1) |
|           |         |                    | Both   | 1990 | 34,902           | (31,875 to 38,007) | 2447.5           | (2256.2 to 2641.3) |
|           |         |                    |        | 2013 | 49,449           | (43,109 to 54,225) | 1965.4           | (1719.9 to 2153.6) |
|           |         | Hemorrhagic Stroke | Male   | 1990 | 11,784           | (9,929 to 14,007)  | 1321.4           | (1114.5 to 1576.6) |
|           |         |                    |        |      | Counts, All Ages |                    | Rate Per 100,000 |                    |
|           |         |                    |        |      |                  |                    | Age-standardized |                    |
| Country   | measure | Stroke Type        | sex    | year | Mean             | 95% UI             | Mean             | 95% UI             |
|           |         |                    |        | 2013 | 11,866           | (9,383 to 14,416)  | 959.2            | (756.6 to 1164.4)  |
|           |         |                    | Female | 1990 | 12,420           | (10,860 to 15,208) | 1310.4           | (1139.1 to 1600.5) |
|           |         |                    |        | 2013 | 12,627           | (10,024 to 15,291) | 915.2            | (724.4 to 1105.5)  |
|           |         |                    | Both   | 1990 | 24,204           | (21,561 to 27,580) | 1317.7           | (1172.3 to 1512.0) |
|           |         |                    |        | 2013 | 24,494           | (20,896 to 28,217) | 937.6            | (796.5 to 1078.2)  |

|            |        |                    |        |      |         |                     |        |                    |
|------------|--------|--------------------|--------|------|---------|---------------------|--------|--------------------|
|            | YLDs   | Ischemic Stroke    | Male   | 1990 | 200     | (125 to 288)        | 23.2   | (14.6 to 33.3)     |
|            |        |                    |        | 2013 | 327     | (211 to 484)        | 26.2   | (16.9 to 38.7)     |
|            |        |                    | Female | 1990 | 140     | (89 to 199)         | 15.5   | (9.8 to 22.1)      |
|            |        |                    |        | 2013 | 200     | (125 to 293)        | 14.6   | (9.2 to 21.3)      |
|            |        |                    | Both   | 1990 | 341     | (225 to 469)        | 19.2   | (12.7 to 26.1)     |
|            |        |                    |        | 2013 | 528     | (347 to 737)        | 20.1   | (13.3 to 28.0)     |
|            |        | Hemorrhagic Stroke | Male   | 1990 | 44      | (27 to 66)          | 4.8    | (3.0 to 7.3)       |
|            |        |                    |        | 2013 | 64      | (40 to 96)          | 5.2    | (3.3 to 7.7)       |
|            |        |                    | Female | 1990 | 32      | (19 to 50)          | 3.4    | (2.0 to 5.1)       |
|            |        |                    |        | 2013 | 46      | (26 to 70)          | 3.5    | (2.1 to 5.3)       |
|            |        |                    | Both   | 1990 | 77      | (48 to 112)         | 4.1    | (2.6 to 5.9)       |
|            |        |                    | Both   | 2013 | 110     | (72 to 156)         | 4.3    | (2.9 to 6.1)       |
| Madagascar | Deaths | Ischemic Stroke    | Male   | 1990 | 3,089   | (1,662 to 4,179)    | 174.3  | (94.5 to 233.6)    |
|            |        |                    |        | 2013 | 5,162   | (2,451 to 7,749)    | 166.1  | (80.5 to 243.1)    |
|            |        |                    | Female | 1990 | 2,637   | (1,843 to 3,448)    | 168.4  | (116.0 to 217.1)   |
|            |        |                    |        | 2013 | 5,486   | (3,341 to 7,575)    | 168.8  | (104.7 to 228.0)   |
|            |        |                    | Both   | 1990 | 5,726   | (3,913 to 7,080)    | 171.8  | (117.9 to 213.4)   |
|            |        |                    |        | 2013 | 10,649  | (6,421 to 14,005)   | 167.7  | (103.3 to 214.4)   |
|            | Deaths | Hemorrhagic Stroke | Male   | 1990 | 4,604   | (3,474 to 6,030)    | 199.7  | (142.1 to 278.0)   |
|            |        |                    |        | 2013 | 8,187   | (5,653 to 11,862)   | 192.7  | (133.3 to 294.1)   |
|            |        |                    | Female | 1990 | 3,858   | (3,040 to 4,800)    | 188.3  | (143.9 to 243.9)   |
|            |        |                    |        | 2013 | 7,832   | (5,265 to 11,071)   | 187.1  | (125.5 to 266.4)   |
|            |        |                    | Both   | 1990 | 8,463   | (6,898 to 10,224)   | 194    | (152.3 to 243.6)   |
|            |        |                    |        | 2013 | 16,019  | (12,157 to 21,196)  | 190.2  | (144.3 to 258.8)   |
|            | DALYs  | Ischemic Stroke    | Male   | 1990 | 64,166  | (34,815 to 86,318)  | 2854.8 | (1538.2 to 3860.2) |
|            |        |                    |        | 2013 | 105,517 | (47,536 to 162,224) | 2631.8 | (1252.5 to 3987.1) |

|         |         |                    |        |      |             |                      |        |                    |
|---------|---------|--------------------|--------|------|-------------|----------------------|--------|--------------------|
|         |         |                    | Female | 1990 | 47,191      | (33,221 to 63,667)   | 2435.6 | (1717.8 to 3205.9) |
|         |         |                    |        | 2013 | 94,555      | (54,915 to 135,395)  | 2372.8 | (1421.9 to 3304.0) |
|         |         |                    | Both   | 1990 | 111,358     | (74,522 to 138,943)  | 2649.7 | (1787.7 to 3278.6) |
|         |         |                    |        | 2013 | 200,073     | (114,705 to 268,535) | 2500.4 | (1484.8 to 3291.1) |
|         |         | Hemorrhagic Stroke | Male   | 1990 | 139,107     | (110,052 to 170,878) | 4699.6 | (3627.3 to 6065.1) |
|         |         |                    |        |      | Counts, All | Ages                 | Rate   | Per 100,000        |
|         |         |                    |        |      |             |                      | Age-   | standardized       |
| Country | measure | Stroke Type        | sex    | year | Mean        | 95% UI               | Mean   | 95% UI             |
|         |         |                    |        | 2013 | 247,677     | (168,983 to 347,353) | 4376.2 | (3012.7 to 6352.7) |
|         |         |                    | Female | 1990 | 104,723     | (81,807 to 126,537)  | 3950.1 | (3102.6 to 4887.2) |
|         |         |                    |        | 2013 | 198,704     | (131,002 to 279,348) | 3740.6 | (2492.8 to 5242.1) |
|         |         |                    | Both   | 1990 | 243,831     | (202,658 to 286,051) | 4320   | (3539.1 to 5177.9) |
|         |         |                    |        | 2013 | 446,381     | (334,436 to 584,877) | 4059   | (3068.2 to 5385.8) |
|         | YLDs    | Ischemic Stroke    | Male   | 1990 | 294         | (184 to 431)         | 10.8   | (6.8 to 16.1)      |
|         |         |                    |        | 2013 | 599         | (382 to 865)         | 11.6   | (7.3 to 16.7)      |
|         |         |                    | Female | 1990 | 189         | (114 to 284)         | 7.2    | (4.4 to 10.7)      |
|         |         |                    |        | 2013 | 436         | (280 to 636)         | 7.7    | (4.8 to 11.4)      |
|         |         |                    | Both   | 1990 | 484         | (314 to 682)         | 9.1    | (5.9 to 12.9)      |
|         |         |                    |        | 2013 | 1,035       | (690 to 1,418)       | 9.6    | (6.4 to 13.4)      |
|         |         | Hemorrhagic Stroke | Male   | 1990 | 89          | (55 to 132)          | 2.8    | (1.7 to 4.2)       |
|         |         |                    |        | 2013 | 188         | (117 to 274)         | 3      | (1.8 to 4.3)       |



|         |         |                    |        |      |             |                    |              |                        |
|---------|---------|--------------------|--------|------|-------------|--------------------|--------------|------------------------|
|         |         |                    | Female | 1990 | 53          | (33 to 82)         | 1.7          | (1.1 to 2.7)           |
|         |         |                    |        | 2013 | 116         | (70 to 174)        | 1.7          | (1.0 to 2.6)           |
|         |         |                    | Both   | 1990 | 143         | (92 to 206)        | 2.3          | (1.4 to 3.3)           |
|         |         |                    | Both   | 2013 | 304         | (199 to 429)       | 2.3          | (1.5 to 3.3)           |
| Malawi  | Deaths  | Ischemic Stroke    | Male   | 1990 | 320         | (69 to 498)        | 33.5         | (6.8 to 52.2)          |
|         |         |                    |        | 2013 | 974         | (242 to 1,513)     | 49.2         | (12.4 to 74.5)         |
|         |         |                    | Female | 1990 | 606         | (238 to 927)       | 53.3         | (20.0 to 80.8)         |
|         |         |                    |        | 2013 | 1,271       | (492 to 1,969)     | 55.9         | (21.9 to 85.1)         |
|         |         |                    | Both   | 1990 | 927         | (390 to 1,339)     | 44.5         | (18.4 to 64.9)         |
|         |         |                    |        | 2013 | 2,245       | (914 to 3,273)     | 53           | (22.0 to 76.1)         |
|         | Deaths  | Hemorrhagic Stroke | Male   | 1990 | 592         | (416 to 834)       | 42.3         | (27.2 to 65.5)         |
|         |         |                    |        | 2013 | 1,433       | (948 to 2,267)     | 58.3         | (36.5 to 95.8)         |
|         |         |                    | Female | 1990 | 1,064       | (774 to 1,484)     | 69.9         | (47.1 to 104.3)        |
|         |         |                    |        | 2013 | 1,821       | (1,275 to 2,812)   | 66.3         | (44.7 to 107.5)        |
|         |         |                    | Both   | 1990 | 1,657       | (1,265 to 2,191)   | 57.5         | (41.1 to 81.8)         |
|         |         |                    |        | 2013 | 3,255       | (2,402 to 4,703)   | 62.9         | (44.4 to 94.9)         |
|         | DALYs   | Ischemic Stroke    | Male   | 1990 | 6,768       | (2,069 to 10,279)  | 473.5        | (106.0 to 732.1)       |
|         |         |                    |        | 2013 | 17,339      | (4,540 to 26,958)  | 696.8        | (176.5 to 1074.6)      |
|         |         |                    | Female | 1990 | 10,997      | (4,490 to 16,716)  | 728          | (288.6 to 1101.4)      |
|         |         |                    |        | 2013 | 19,598      | (7,361 to 30,674)  | 710.1        | (275.6 to 1099.2)      |
|         |         |                    | Both   | 1990 | 17,766      | (7,661 to 25,038)  | 614.5        | (256.2 to 885.6)       |
|         |         |                    |        | 2013 | 36,938      | (15,001 to 54,440) | 705.6        | (292.5 to 1024.5)      |
|         |         |                    |        |      |             |                    |              |                        |
|         |         |                    |        |      | Counts, All | Ages               | Rate         | Per 100,000            |
| Country | measure | Stroke Type        | sex    | year | Mean        | 95% UI             | Age-<br>Mean | standardized<br>95% UI |
|         |         | Hemorrhagic Stroke | Male   | 1990 | 18,674      | (13,926 to 24,976) | 857.2        | (602.6 to 1205.3)      |

|          |        |                    |        |      |        |                     |        |                   |
|----------|--------|--------------------|--------|------|--------|---------------------|--------|-------------------|
|          |        |                    |        | 2013 | 35,517 | (24,992 to 53,306)  | 1084.6 | (726.2 to 1702.1) |
|          |        |                    | Female | 1990 | 27,871 | (20,948 to 38,616)  | 1314.9 | (960.9 to 1826.2) |
|          |        |                    |        | 2013 | 38,876 | (27,857 to 56,055)  | 1109.7 | (784.8 to 1684.6) |
|          |        |                    | Both   | 1990 | 46,545 | (37,235 to 58,915)  | 1107.2 | (850.4 to 1458.6) |
|          |        |                    |        | 2013 | 74,393 | (57,214 to 101,348) | 1102.2 | (820.9 to 1563.6) |
|          | YLDs   | Ischemic Stroke    | Male   | 1990 | 188    | (117 to 281)        | 9.8    | (6.1 to 14.6)     |
|          |        |                    |        | 2013 | 343    | (218 to 504)        | 9.9    | (6.2 to 14.8)     |
|          |        |                    | Female | 1990 | 147    | (90 to 214)         | 6.9    | (4.2 to 10.1)     |
|          |        |                    |        | 2013 | 274    | (166 to 402)        | 7.1    | (4.3 to 10.4)     |
|          |        |                    | Both   | 1990 | 336    | (222 to 477)        | 8.2    | (5.5 to 11.5)     |
|          |        |                    |        | 2013 | 617    | (411 to 861)        | 8.4    | (5.5 to 11.8)     |
|          |        | Hemorrhagic Stroke | Male   | 1990 | 71     | (43 to 106)         | 3      | (1.8 to 4.4)      |
|          |        |                    |        | 2013 | 124    | (74 to 194)         | 2.9    | (1.7 to 4.5)      |
|          |        |                    | Female | 1990 | 47     | (28 to 71)          | 1.8    | (1.1 to 2.7)      |
|          |        |                    |        | 2013 | 83     | (50 to 122)         | 1.8    | (1.1 to 2.7)      |
|          |        |                    | Both   | 1990 | 118    | (76 to 169)         | 2.4    | (1.5 to 3.3)      |
|          |        |                    | Both   | 2013 | 208    | (133 to 303)        | 2.3    | (1.5 to 3.4)      |
| Malaysia | Deaths | Ischemic Stroke    | Male   | 1990 | 2,305  | (1,737 to 2,800)    | 76.6   | (57.6 to 94.2)    |
|          |        |                    |        | 2013 | 4,323  | (3,409 to 5,933)    | 57.3   | (45.0 to 79.1)    |
|          |        |                    | Female | 1990 | 2,500  | (1,811 to 2,916)    | 82.2   | (59.9 to 96.6)    |
|          |        |                    |        | 2013 | 3,335  | (2,696 to 4,426)    | 51     | (41.3 to 67.4)    |
|          |        |                    | Both   | 1990 | 4,806  | (3,865 to 5,437)    | 79.7   | (63.7 to 91.1)    |
|          |        |                    |        | 2013 | 7,658  | (6,486 to 9,931)    | 53.9   | (45.4 to 70.1)    |
|          | Deaths | Hemorrhagic Stroke | Male   | 1990 | 2,445  | (1,908 to 2,965)    | 61.4   | (46.1 to 75.0)    |
|          |        |                    |        | 2013 | 4,227  | (3,288 to 5,376)    | 45.5   | (34.8 to 58.1)    |
|          |        |                    | Female | 1990 | 2,442  | (1,796 to 2,803)    | 63     | (44.6 to 73.9)    |



|                  |        |                    |        |      |       |                  |                  |                    |
|------------------|--------|--------------------|--------|------|-------|------------------|------------------|--------------------|
|                  |        |                    | Both   | 1990 | 2,059 | (1,373 to 2,891) | 26.5             | (17.8 to 37.1)     |
|                  |        |                    |        | 2013 | 5,423 | (3,649 to 7,455) | 29.5             | (20.0 to 40.5)     |
|                  |        | Hemorrhagic Stroke | Male   | 1990 | 1,299 | (832 to 1,858)   | 29.7             | (19.1 to 42.7)     |
|                  |        |                    |        | 2013 | 3,401 | (2,232 to 4,813) | 34.5             | (22.6 to 49.3)     |
|                  |        |                    | Female | 1990 | 1,079 | (710 to 1,496)   | 24.9             | (16.3 to 35.3)     |
|                  |        |                    |        | 2013 | 2,535 | (1,654 to 3,560) | 24.9             | (16.4 to 34.6)     |
|                  |        |                    | Both   | 1990 | 2,379 | (1,595 to 3,217) | 27.3             | (18.7 to 37.2)     |
|                  |        |                    | Both   | 2013 | 5,936 | (4,006 to 8,066) | 29.7             | (20.4 to 40.2)     |
| Maldives         | Deaths | Ischemic Stroke    | Male   | 1990 | 44    | (28 to 58)       | 134.3            | (84.5 to 169.9)    |
|                  |        |                    |        | 2013 | 51    | (39 to 74)       | 59.3             | (45.2 to 84.5)     |
|                  |        |                    | Female | 1990 | 16    | (7 to 31)        | 85.6             | (44.1 to 144.9)    |
|                  |        |                    |        | 2013 | 40    | (23 to 51)       | 61               | (34.8 to 76.8)     |
|                  |        |                    | Both   | 1990 | 61    | (40 to 81)       | 116.2            | (81.6 to 147.1)    |
|                  |        |                    |        | 2013 | 92    | (69 to 111)      | 59.5             | (43.8 to 71.7)     |
|                  | Deaths | Hemorrhagic Stroke | Male   | 1990 | 52    | (33 to 68)       | 88.4             | (52.7 to 123.7)    |
|                  |        |                    |        | 2013 | 22    | (16 to 36)       | 21.6             | (14.9 to 37.5)     |
|                  |        |                    | Female | 1990 | 22    | (14 to 41)       | 59.7             | (41.1 to 98.5)     |
|                  |        |                    |        | 2013 | 17    | (11 to 22)       | 21.4             | (13.5 to 27.3)     |
|                  |        |                    | Both   | 1990 | 74    | (57 to 90)       | 76.5             | (58.5 to 98.4)     |
|                  |        |                    |        | 2013 | 40    | (31 to 54)       | 21.2             | (16.2 to 30.3)     |
|                  | DALYs  | Ischemic Stroke    | Male   | 1990 | 937   | (581 to 1,279)   | 1978.9           | (1262.3 to 2545.1) |
|                  |        |                    |        | 2013 | 751   | (579 to 1,034)   | 763.2            | (588.6 to 1066.6)  |
|                  |        |                    | Female | 1990 | 365   | (127 to 751)     | 1221.7           | (563.6 to 2143.4)  |
|                  |        |                    |        | 2013 | 536   | (312 to 705)     | 664.3            | (386.4 to 853.3)   |
|                  |        |                    | Both   | 1990 | 1,302 | (770 to 1,806)   | 1684.1           | (1116.4 to 2193.4) |
|                  |        |                    |        | 2013 | 1,288 | (986 to 1,562)   | 711.6            | (543.5 to 858.3)   |
| Counts, All Ages |        |                    |        |      |       |                  | Rate Per 100,000 |                    |

| Country | measure | Stroke Type        | sex    | year | Age- standardized |                  |        |                    |
|---------|---------|--------------------|--------|------|-------------------|------------------|--------|--------------------|
|         |         |                    |        |      | Mean              | 95% UI           | Mean   | 95% UI             |
|         |         | Hemorrhagic Stroke | Male   | 1990 | 2,141             | (1,500 to 2,663) | 2349.4 | (1505.1 to 3016.5) |
|         |         |                    |        | 2013 | 750               | (584 to 1,004)   | 561.8  | (426.9 to 812.8)   |
|         |         |                    | Female | 1990 | 802               | (448 to 1,735)   | 1406.8 | (939.0 to 2473.7)  |
|         |         |                    |        | 2013 | 479               | (310 to 597)     | 423.2  | (277.0 to 525.6)   |
|         |         |                    | Both   | 1990 | 2,943             | (2,330 to 3,708) | 1929.4 | (1494.2 to 2318.8) |
|         |         |                    |        | 2013 | 1,229             | (1,001 to 1,477) | 492.1  | (396.8 to 612.5)   |
|         | YLDs    | Ischemic Stroke    | Male   | 1990 | 12                | (8 to 18)        | 26.4   | (16.7 to 37.7)     |
|         |         |                    |        | 2013 | 28                | (18 to 42)       | 28.9   | (18.0 to 42.8)     |
|         |         |                    | Female | 1990 | 7                 | (5 to 10)        | 24.2   | (15.8 to 34.0)     |
|         |         |                    |        | 2013 | 21                | (14 to 30)       | 24.2   | (15.8 to 34.9)     |
|         |         |                    | Both   | 1990 | 20                | (13 to 28)       | 25.5   | (17.1 to 35.2)     |
|         |         |                    |        | 2013 | 49                | (34 to 70)       | 26.6   | (18.2 to 36.9)     |
|         |         | Hemorrhagic Stroke | Male   | 1990 | 15                | (10 to 21)       | 29.1   | (19.0 to 40.7)     |
|         |         |                    |        | 2013 | 32                | (21 to 48)       | 31     | (19.8 to 45.8)     |
|         |         |                    | Female | 1990 | 8                 | (5 to 11)        | 23.2   | (15.3 to 31.9)     |
|         |         |                    |        | 2013 | 22                | (14 to 30)       | 22.7   | (15.2 to 31.8)     |
|         |         |                    | Both   | 1990 | 24                | (16 to 33)       | 26.6   | (17.9 to 36.0)     |
|         |         |                    | Both   | 2013 | 54                | (37 to 75)       | 27     | (18.2 to 37.4)     |
| Mali    | Deaths  | Ischemic Stroke    | Male   | 1990 | 669               | (408 to 903)     | 52     | (32.0 to 70.0)     |
|         |         |                    |        | 2013 | 1,394             | (808 to 1,893)   | 79.1   | (46.0 to 106.3)    |
|         |         |                    | Female | 1990 | 1,316             | (787 to 1,783)   | 88.7   | (52.2 to 116.1)    |
|         |         |                    |        | 2013 | 2,651             | (1,359 to 3,578) | 125    | (65.4 to 166.0)    |
|         |         |                    | Both   | 1990 | 1,986             | (1,420 to 2,442) | 71.9   | (50.8 to 88.1)     |
|         |         |                    |        | 2013 | 4,046             | (2,443 to 5,114) | 104.2  | (62.4 to 132.0)    |
|         | Deaths  | Hemorrhagic        | Male   | 1990 | 667               | (373 to 869)     | 39.7   | (20.0 to 54.3)     |



|       |        |                    |        |      |       |                  |       |                  |
|-------|--------|--------------------|--------|------|-------|------------------|-------|------------------|
|       |        |                    |        | 2013 | 824   | (555 to 1,141)   | 13.4  | (9.0 to 18.6)    |
|       |        | Hemorrhagic Stroke | Male   | 1990 | 88    | (56 to 127)      | 4.3   | (2.7 to 6.3)     |
|       |        |                    |        | 2013 | 137   | (85 to 196)      | 3.8   | (2.4 to 5.6)     |
|       |        |                    | Female | 1990 | 69    | (43 to 100)      | 3     | (1.8 to 4.4)     |
|       |        |                    |        | 2013 | 104   | (63 to 154)      | 2.7   | (1.7 to 4.1)     |
|       |        |                    | Both   | 1990 | 157   | (104 to 217)     | 3.6   | (2.4 to 4.9)     |
|       |        |                    | Both   | 2013 | 241   | (160 to 339)     | 3.3   | (2.1 to 4.6)     |
| Malta | Deaths | Ischemic Stroke    | Male   | 1990 | 65    | (52 to 84)       | 50.3  | (40.3 to 64.7)   |
|       |        |                    |        | 2013 | 72    | (54 to 91)       | 29.6  | (21.9 to 37.3)   |
|       |        |                    | Female | 1990 | 91    | (72 to 113)      | 46.6  | (36.9 to 57.5)   |
|       |        |                    |        | 2013 | 108   | (78 to 133)      | 30.3  | (21.7 to 37.5)   |
|       |        |                    | Both   | 1990 | 157   | (137 to 189)     | 48.3  | (42.2 to 58.1)   |
|       |        |                    |        | 2013 | 181   | (143 to 213)     | 30.3  | (23.5 to 35.8)   |
|       | Deaths | Hemorrhagic Stroke | Male   | 1990 | 50    | (37 to 63)       | 36.1  | (26.9 to 45.7)   |
|       |        |                    |        | 2013 | 56    | (41 to 71)       | 21.4  | (15.3 to 27.4)   |
|       |        |                    | Female | 1990 | 67    | (47 to 80)       | 34.3  | (24.1 to 40.8)   |
|       |        |                    |        | 2013 | 67    | (49 to 90)       | 18.9  | (13.8 to 25.8)   |
|       |        |                    | Both   | 1990 | 117   | (94 to 135)      | 35.2  | (28.2 to 40.8)   |
|       |        |                    |        | 2013 | 123   | (100 to 150)     | 20.2  | (16.3 to 24.9)   |
|       | DALYs  | Ischemic Stroke    | Male   | 1990 | 992   | (809 to 1,258)   | 698.9 | (569.7 to 888.3) |
|       |        |                    |        | 2013 | 1,153 | (893 to 1,421)   | 401.1 | (313.0 to 492.6) |
|       |        |                    | Female | 1990 | 1,114 | (906 to 1,350)   | 567.5 | (460.9 to 686.2) |
|       |        |                    |        | 2013 | 1,168 | (906 to 1,420)   | 318   | (247.1 to 387.7) |
|       |        |                    | Both   | 1990 | 2,107 | (1,856 to 2,495) | 624.5 | (551.3 to 738.1) |
|       |        |                    |        | 2013 | 2,321 | (1,940 to 2,718) | 357.8 | (297.1 to 418.8) |
|       |        | Hemorrhagic Stroke | Male   | 1990 | 952   | (742 to 1,177)   | 619.9 | (476.8 to 771.5) |

| Country          | measure | Stroke Type        | sex    | year | Counts, All<br>Mean | Ages<br>95% UI   | Rate<br>Age-<br>standardized<br>Mean | Per 100,000<br>standardized<br>95% UI |
|------------------|---------|--------------------|--------|------|---------------------|------------------|--------------------------------------|---------------------------------------|
|                  |         |                    |        | 2013 | 960                 | (710 to 1,203)   | 330.8                                | (246.9 to 414.7)                      |
|                  |         |                    | Female | 1990 | 1,032               | (763 to 1,194)   | 527.8                                | (390.3 to 610.6)                      |
|                  |         |                    |        | 2013 | 814                 | (624 to 1,074)   | 239.3                                | (185.5 to 313.1)                      |
|                  |         |                    |        | 1990 | 1,984               | (1,652 to 2,262) | 569.4                                | (472.7 to 650.3)                      |
|                  |         |                    |        | 2013 | 1,775               | (1,481 to 2,120) | 283.3                                | (236.1 to 336.6)                      |
|                  | YLDs    | Ischemic Stroke    | Male   | 1990 | 122                 | (78 to 167)      | 82                                   | (52.2 to 112.1)                       |
|                  |         |                    |        | 2013 | 273                 | (168 to 405)     | 88.8                                 | (54.3 to 130.3)                       |
|                  |         |                    | Female | 1990 | 117                 | (79 to 164)      | 59.8                                 | (40.6 to 83.4)                        |
|                  |         |                    |        | 2013 | 208                 | (134 to 299)     | 58.3                                 | (37.9 to 83.1)                        |
|                  |         |                    | Both   | 1990 | 239                 | (164 to 321)     | 69.3                                 | (47.4 to 93.0)                        |
|                  |         |                    |        | 2013 | 482                 | (319 to 676)     | 72.3                                 | (47.9 to 101.2)                       |
|                  |         | Hemorrhagic Stroke | Male   | 1990 | 27                  | (14 to 48)       | 17.5                                 | (9.2 to 31.5)                         |
|                  |         |                    |        | 2013 | 50                  | (25 to 90)       | 16.9                                 | (8.6 to 29.8)                         |
|                  |         |                    | Female | 1990 | 25                  | (14 to 41)       | 12.8                                 | (7.1 to 20.9)                         |
|                  |         |                    |        | 2013 | 41                  | (23 to 71)       | 12.6                                 | (7.2 to 20.7)                         |
|                  |         |                    | Both   | 1990 | 52                  | (32 to 79)       | 14.8                                 | (9.3 to 22.4)                         |
|                  |         |                    | Both   | 2013 | 92                  | (55 to 142)      | 14.5                                 | (8.9 to 21.9)                         |
| Marshall Islands | Deaths  | Ischemic Stroke    | Male   | 1990 | 5                   | (2 to 7)         | 90.8                                 | (48.4 to 121.6)                       |
|                  |         |                    |        | 2013 | 9                   | (5 to 13)        | 85.4                                 | (45.3 to 121.4)                       |
|                  |         |                    | Female | 1990 | 2                   | (1 to 4)         | 46.6                                 | (32.7 to 68.0)                        |
|                  |         |                    |        | 2013 | 7                   | (3 to 10)        | 54.6                                 | (28.5 to 79.1)                        |
|                  |         |                    | Both   | 1990 | 8                   | (5 to 10)        | 66.2                                 | (48.8 to 83.4)                        |
|                  |         |                    |        | 2013 | 16                  | (10 to 22)       | 68.1                                 | (43.1 to 88.1)                        |
|                  | Deaths  | Hemorrhagic Stroke | Male   | 1990 | 10                  | (6 to 13)        | 128.3                                | (80.8 to 168.1)                       |



|         |         |                    |        |      |             |                |        |                    |
|---------|---------|--------------------|--------|------|-------------|----------------|--------|--------------------|
|         |         |                    |        | 2013 | 19          | (11 to 28)     | 124.1  | (75.9 to 172.9)    |
|         |         |                    | Female | 1990 | 4           | (3 to 6)       | 62.7   | (44.9 to 88.7)     |
|         |         |                    |        | 2013 | 12          | (6 to 17)      | 76.6   | (41.7 to 111.9)    |
|         |         |                    | Both   | 1990 | 15          | (11 to 19)     | 93.5   | (71.6 to 118.6)    |
|         |         |                    |        | 2013 | 31          | (20 to 42)     | 98.7   | (64.7 to 131.6)    |
|         | DALYs   | Ischemic Stroke    | Male   | 1990 | 125         | (66 to 181)    | 1532.7 | (827.1 to 2085.3)  |
|         |         |                    |        | 2013 | 220         | (116 to 332)   | 1426.3 | (776.8 to 2052.9)  |
|         |         |                    | Female | 1990 | 60          | (39 to 87)     | 731.9  | (506.4 to 1013.1)  |
|         |         |                    |        | 2013 | 141         | (62 to 224)    | 851.6  | (407.4 to 1289.9)  |
|         |         |                    | Both   | 1990 | 186         | (117 to 251)   | 1106.5 | (752.0 to 1428.7)  |
|         |         |                    |        | 2013 | 361         | (207 to 493)   | 1116.1 | (672.3 to 1474.3)  |
|         |         | Hemorrhagic Stroke | Male   | 1990 | 347         | (247 to 455)   | 2925.1 | (1940.5 to 3840.5) |
|         |         |                    |        | 2013 | 601         | (371 to 894)   | 2852.8 | (1756.1 to 4172.1) |
|         |         |                    | Female | 1990 | 142         | (105 to 186)   | 1273.8 | (939.3 to 1737.6)  |
|         |         |                    |        | 2013 | 318         | (161 to 476)   | 1557.2 | (829.3 to 2295.7)  |
|         |         |                    | Both   | 1990 | 490         | (384 to 605)   | 2084.5 | (1599.1 to 2598.2) |
|         |         |                    |        | 2013 | 919         | (592 to 1,266) | 2185.9 | (1425.3 to 2971.5) |
|         | YLDs    | Ischemic Stroke    | Male   | 1990 | 2           | (1 to 2)       | 28.2   | (18.2 to 39.7)     |
|         |         |                    |        |      | Counts, All | Ages           | Rate   | Per 100,000        |
|         |         |                    |        |      | Mean        | 95% UI         | Age-   | standardized       |
| Country | measure | Stroke Type        | sex    | year | Mean        | 95% UI         | Mean   | 95% UI             |
|         |         |                    |        | 2013 | 3           | (2 to 4)       | 24.5   | (15.8 to 34.4)     |
|         |         |                    | Female | 1990 | 1           | (1 to 2)       | 20.1   | (12.7 to 28.5)     |
|         |         |                    |        | 2013 | 3           | (2 to 4)       | 19.2   | (12.5 to 27.7)     |
|         |         |                    | Both   | 1990 | 3           | (2 to 5)       | 23.7   | (15.7 to 32.7)     |
|         |         |                    |        | 2013 | 6           | (4 to 9)       | 21.6   | (14.7 to 29.6)     |
|         |         | Hemorrhagic Stroke | Male   | 1990 | 2           | (1 to 4)       | 33.2   | (22.2 to 47.9)     |

|            |        |                    |        |      |        |                    |        |                    |
|------------|--------|--------------------|--------|------|--------|--------------------|--------|--------------------|
|            |        |                    |        | 2013 | 4      | (3 to 6)           | 29.3   | (19.1 to 41.1)     |
|            |        |                    | Female | 1990 | 1      | (1 to 2)           | 21.4   | (14.0 to 29.7)     |
|            |        |                    |        | 2013 | 3      | (2 to 5)           | 21     | (13.5 to 30.1)     |
|            |        |                    | Both   | 1990 | 4      | (3 to 6)           | 26.9   | (18.1 to 37.2)     |
|            |        |                    | Both   | 2013 | 8      | (5 to 11)          | 24.8   | (16.7 to 33.3)     |
| Mauritania | Deaths | Ischemic Stroke    | Male   | 1990 | 180    | (111 to 252)       | 70     | (44.9 to 95.4)     |
|            |        |                    |        | 2013 | 545    | (288 to 738)       | 105.9  | (59.5 to 139.9)    |
|            |        |                    | Female | 1990 | 265    | (187 to 358)       | 85     | (61.4 to 117.5)    |
|            |        |                    |        | 2013 | 710    | (404 to 973)       | 113.3  | (65.6 to 151.8)    |
|            |        |                    | Both   | 1990 | 445    | (355 to 555)       | 78.6   | (62.9 to 98.4)     |
|            |        |                    |        | 2013 | 1,256  | (810 to 1,599)     | 110.5  | (72.0 to 138.9)    |
|            | Deaths | Hemorrhagic Stroke | Male   | 1990 | 165    | (109 to 220)       | 49.5   | (30.6 to 66.9)     |
|            |        |                    |        | 2013 | 337    | (195 to 547)       | 47.7   | (25.7 to 85.9)     |
|            |        |                    | Female | 1990 | 250    | (183 to 359)       | 66.4   | (48.0 to 96.3)     |
|            |        |                    |        | 2013 | 446    | (264 to 858)       | 57.1   | (32.9 to 118.5)    |
|            |        |                    | Both   | 1990 | 416    | (322 to 529)       | 59.1   | (44.8 to 76.0)     |
|            |        |                    |        | 2013 | 784    | (499 to 1,332)     | 53.1   | (31.8 to 97.6)     |
|            | DALYs  | Ischemic Stroke    | Male   | 1990 | 3,894  | (2,351 to 5,536)   | 1123.6 | (690.1 to 1556.5)  |
|            |        |                    |        | 2013 | 11,347 | (5,797 to 16,019)  | 1652.3 | (879.4 to 2232.6)  |
|            |        |                    | Female | 1990 | 5,144  | (3,470 to 6,915)   | 1299.7 | (909.3 to 1753.2)  |
|            |        |                    |        | 2013 | 12,638 | (6,830 to 17,708)  | 1638.3 | (921.2 to 2251.3)  |
|            |        |                    | Both   | 1990 | 9,039  | (7,042 to 11,435)  | 1224.4 | (974.8 to 1524.7)  |
|            |        |                    |        | 2013 | 23,986 | (14,540 to 31,252) | 1653.5 | (1061.4 to 2110.7) |
|            |        | Hemorrhagic Stroke | Male   | 1990 | 4,996  | (3,509 to 6,452)   | 1025.6 | (675.1 to 1355.4)  |
|            |        |                    |        | 2013 | 10,347 | (6,317 to 15,479)  | 1011.8 | (586.7 to 1645.1)  |
|            |        |                    | Female | 1990 | 6,478  | (4,725 to 9,079)   | 1284.3 | (937.9 to 1845.7)  |
|            |        |                    |        | 2013 | 11,452 | (7,163 to 20,478)  | 1124.3 | (675.5 to 2118.2)  |

|           |         |                    |        |      |             |                    |        |                   |
|-----------|---------|--------------------|--------|------|-------------|--------------------|--------|-------------------|
|           |         |                    | Both   | 1990 | 11,474      | (9,040 to 14,349)  | 1170.9 | (907.6 to 1477.6) |
|           |         |                    |        | 2013 | 21,800      | (14,611 to 33,603) | 1077.5 | (693.4 to 1803.8) |
|           | YLDs    | Ischemic Stroke    | Male   | 1990 | 64          | (42 to 90)         | 15.4   | (10.2 to 21.3)    |
|           |         |                    |        | 2013 | 146         | (91 to 209)        | 16.4   | (10.5 to 23.4)    |
|           |         |                    | Female | 1990 | 56          | (35 to 83)         | 11.7   | (7.4 to 17.0)     |
|           |         |                    |        | 2013 | 121         | (79 to 174)        | 12.1   | (8.0 to 17.2)     |
|           |         |                    |        |      | Counts, All | Ages               | Rate   | Per 100,000       |
| Country   | measure | Stroke Type        | sex    | year | Mean        | 95% UI             | Age-   | standardized      |
|           |         |                    | Both   | 1990 | 121         | (81 to 167)        | 13.4   | (9.0 to 18.3)     |
|           |         |                    |        | 2013 | 268         | (177 to 377)       | 14     | (9.3 to 19.6)     |
|           |         | Hemorrhagic Stroke | Male   | 1990 | 21          | (13 to 30)         | 4.2    | (2.6 to 6.1)      |
|           |         |                    |        | 2013 | 44          | (26 to 66)         | 4.1    | (2.5 to 6.1)      |
|           |         |                    | Female | 1990 | 16          | (10 to 24)         | 3      | (1.8 to 4.3)      |
|           |         |                    |        | 2013 | 32          | (20 to 48)         | 2.8    | (1.8 to 4.2)      |
|           |         |                    | Both   | 1990 | 37          | (24 to 51)         | 3.5    | (2.4 to 4.9)      |
|           |         |                    | Both   | 2013 | 76          | (49 to 109)        | 3.4    | (2.2 to 4.9)      |
| Mauritius | Deaths  | Ischemic Stroke    | Male   | 1990 | 302         | (257 to 373)       | 172.7  | (145.0 to 210.6)  |
|           |         |                    |        | 2013 | 484         | (365 to 572)       | 114.5  | (87.1 to 134.9)   |
|           |         |                    | Female | 1990 | 277         | (243 to 349)       | 108    | (94.8 to 136.7)   |
|           |         |                    |        | 2013 | 415         | (335 to 552)       | 69.5   | (56.5 to 92.0)    |
|           |         |                    | Both   | 1990 | 580         | (520 to 695)       | 133.7  | (119.9 to 161.5)  |
|           |         |                    |        | 2013 | 899         | (770 to 1,038)     | 88.5   | (76.0 to 102.0)   |
|           | Deaths  | Hemorrhagic Stroke | Male   | 1990 | 212         | (162 to 257)       | 79     | (57.6 to 96.8)    |
|           |         |                    |        | 2013 | 249         | (183 to 331)       | 41.2   | (30.3 to 55.9)    |
|           |         |                    | Female | 1990 | 161         | (115 to 183)       | 50.1   | (34.3 to 57.8)    |
|           |         |                    |        | 2013 | 137         | (100 to 227)       | 20.1   | (14.5 to 33.4)    |



|        |        |                    |        |      |         |                      |       |                  |
|--------|--------|--------------------|--------|------|---------|----------------------|-------|------------------|
|        |        |                    |        | 2013 | 163     | (109 to 225)         | 23.9  | (15.9 to 33.1)   |
|        |        |                    | Both   | 1990 | 160     | (107 to 217)         | 25.9  | (17.5 to 34.8)   |
|        |        |                    | Both   | 2013 | 344     | (237 to 470)         | 27.5  | (19.1 to 37.6)   |
| Mexico | Deaths | Ischemic Stroke    | Male   | 1990 | 3,545   | (2,688 to 4,254)     | 22    | (16.5 to 26.3)   |
|        |        |                    |        | 2013 | 5,690   | (4,488 to 8,068)     | 16.7  | (13.2 to 23.8)   |
|        |        |                    | Female | 1990 | 4,229   | (3,034 to 5,146)     | 20.7  | (14.9 to 25.2)   |
|        |        |                    |        | 2013 | 6,527   | (5,017 to 8,959)     | 14.2  | (10.9 to 19.5)   |
|        |        |                    | Both   | 1990 | 7,775   | (6,381 to 8,948)     | 21.3  | (17.6 to 24.4)   |
|        |        |                    |        | 2013 | 12,218  | (10,715 to 15,926)   | 15.4  | (13.4 to 19.9)   |
|        | Deaths | Hemorrhagic Stroke | Male   | 1990 | 6,853   | (5,751 to 8,166)     | 38.5  | (31.9 to 45.8)   |
|        |        |                    |        | 2013 | 13,695  | (11,294 to 16,775)   | 38    | (31.2 to 46.7)   |
|        |        |                    | Female | 1990 | 7,980   | (6,331 to 9,739)     | 36.5  | (29.1 to 45.0)   |
|        |        |                    |        | 2013 | 14,805  | (11,564 to 18,475)   | 31.5  | (24.5 to 39.0)   |
|        |        |                    | Both   | 1990 | 14,833  | (13,112 to 17,254)   | 37.4  | (33.1 to 43.5)   |
|        |        |                    |        | 2013 | 28,500  | (24,803 to 32,864)   | 34.4  | (29.8 to 39.5)   |
|        | DALYs  | Ischemic Stroke    | Male   | 1990 | 64,366  | (49,820 to 77,631)   | 332.4 | (256.8 to 400.0) |
|        |        |                    |        | 2013 | 92,942  | (74,290 to 127,285)  | 242.6 | (194.7 to 334.8) |
|        |        |                    | Female | 1990 | 66,451  | (47,483 to 80,671)   | 287.5 | (206.5 to 349.2) |
|        |        |                    |        | 2013 | 88,906  | (69,561 to 123,319)  | 184.8 | (144.8 to 255.5) |
|        |        |                    | Both   | 1990 | 130,817 | (108,175 to 149,141) | 307.8 | (253.1 to 353.0) |
|        |        |                    |        | 2013 | 181,849 | (157,868 to 239,592) | 210.9 | (184.2 to 279.1) |
|        |        | Hemorrhagic Stroke | Male   | 1990 | 167,065 | (141,188 to 196,415) | 720.5 | (605.4 to 847.1) |
|        |        |                    |        | 2013 | 281,834 | (237,974 to 340,374) | 672   | (564.8 to 809.8) |

|         |         |                    |        |      |             |                      |       |                  |
|---------|---------|--------------------|--------|------|-------------|----------------------|-------|------------------|
|         |         |                    | Female | 1990 | 174,348     | (139,878 to 212,233) | 662.4 | (534.8 to 799.9) |
|         |         |                    |        | 2013 | 260,143     | (215,903 to 331,984) | 510.8 | (421.5 to 650.4) |
|         |         |                    | Both   | 1990 | 341,413     | (302,153 to 386,699) | 688   | (610.5 to 782.5) |
|         |         |                    |        | 2013 | 541,978     | (486,778 to 621,913) | 583.9 | (521.3 to 672.2) |
|         | YLDs    | Ischemic Stroke    | Male   | 1990 | 1,273       | (883 to 1,708)       | 6.6   | (4.6 to 8.8)     |
|         |         |                    |        | 2013 | 2,806       | (1,954 to 3,722)     | 7.1   | (5.0 to 9.5)     |
|         |         |                    |        |      | Counts, All | Ages                 | Rate  | Per 100,000      |
|         |         |                    |        |      |             |                      | Age-  | standardized     |
| Country | measure | Stroke Type        | sex    | year | Mean        | 95% UI               | Mean  | 95% UI           |
|         |         |                    | Female | 1990 | 1,194       | (819 to 1,603)       | 5.3   | (3.6 to 7.1)     |
|         |         |                    |        | 2013 | 2,782       | (1,926 to 3,742)     | 5.7   | (3.9 to 7.6)     |
|         |         |                    | Both   | 1990 | 2,468       | (1,710 to 3,300)     | 5.9   | (4.1 to 7.8)     |
|         |         |                    |        | 2013 | 5,589       | (3,921 to 7,481)     | 6.3   | (4.4 to 8.5)     |
|         |         | Hemorrhagic Stroke | Male   | 1990 | 4,310       | (2,976 to 5,772)     | 19.7  | (13.7 to 26.2)   |
|         |         |                    |        | 2013 | 8,931       | (6,201 to 11,841)    | 20.9  | (14.6 to 27.5)   |
|         |         |                    | Female | 1990 | 3,204       | (2,213 to 4,265)     | 12.8  | (8.9 to 17.1)    |
|         |         |                    |        | 2013 | 6,539       | (4,505 to 8,695)     | 12.5  | (8.6 to 16.5)    |
|         |         |                    | Both   | 1990 | 7,515       | (5,199 to 10,015)    | 16    | (11.1 to 21.3)   |
|         |         |                    | Both   | 2013 | 15,471      | (10,773 to 20,490)   | 16.2  | (11.3 to 21.4)   |
| Moldova | Deaths  | Ischemic Stroke    | Male   | 1990 | 1,301       | (1,067 to 1,619)     | 106.3 | (86.8 to 130.3)  |
|         |         |                    |        | 2013 | 1,511       | (1,156 to 1,787)     | 105.6 | (81.0 to 125.8)  |
|         |         |                    | Female | 1990 | 1,958       | (1,524 to 2,442)     | 95.4  | (74.2 to 116.6)  |
|         |         |                    |        | 2013 | 1,841       | (1,249 to 2,106)     | 71    | (48.1 to 81.3)   |
|         |         |                    | Both   | 1990 | 3,259       | (2,834 to 3,881)     | 99.9  | (85.8 to 118.0)  |
|         |         |                    |        | 2013 | 3,352       | (2,552 to 3,767)     | 84.2  | (64.4 to 94.7)   |

|         |         |                    |        |      |             |                    |        |                    |
|---------|---------|--------------------|--------|------|-------------|--------------------|--------|--------------------|
|         | Deaths  | Hemorrhagic Stroke | Male   | 1990 | 1,243       | (857 to 1,496)     | 83.4   | (56.9 to 101.4)    |
|         |         |                    |        | 2013 | 1,326       | (1,081 to 1,711)   | 78.7   | (64.2 to 103.8)    |
|         |         |                    | Female | 1990 | 1,691       | (1,139 to 1,967)   | 75     | (49.4 to 87.4)     |
|         |         |                    |        | 2013 | 1,375       | (1,162 to 2,012)   | 53.8   | (45.5 to 78.4)     |
|         |         |                    | Both   | 1990 | 2,934       | (2,187 to 3,275)   | 78.6   | (58.0 to 88.3)     |
|         |         |                    |        | 2013 | 2,701       | (2,333 to 3,497)   | 64.5   | (55.6 to 83.9)     |
|         | DALYs   | Ischemic Stroke    | Male   | 1990 | 23,366      | (19,230 to 29,831) | 1623.2 | (1338.4 to 2024.7) |
|         |         |                    |        | 2013 | 26,167      | (19,850 to 31,037) | 1598.8 | (1215.5 to 1884.2) |
|         |         |                    | Female | 1990 | 29,223      | (23,293 to 37,959) | 1314.9 | (1053.1 to 1686.2) |
|         |         |                    |        | 2013 | 23,880      | (15,980 to 27,126) | 926.2  | (619.2 to 1054.3)  |
|         |         |                    | Both   | 1990 | 52,589      | (46,194 to 65,309) | 1439.7 | (1264.0 to 1752.7) |
|         |         |                    |        | 2013 | 50,048      | (38,110 to 56,792) | 1196.6 | (910.8 to 1356.4)  |
|         |         | Hemorrhagic Stroke | Male   | 1990 | 29,823      | (21,403 to 35,779) | 1752.3 | (1235.0 to 2099.0) |
|         |         |                    |        | 2013 | 30,926      | (25,372 to 38,974) | 1653   | (1358.7 to 2091.5) |
|         |         |                    | Female | 1990 | 35,513      | (25,467 to 41,219) | 1498.7 | (1067.8 to 1747.9) |
|         |         |                    |        | 2013 | 24,758      | (21,257 to 35,224) | 983.8  | (845.1 to 1397.8)  |
|         |         |                    | Both   | 1990 | 65,337      | (50,643 to 72,798) | 1607.4 | (1236.7 to 1793.8) |
|         |         |                    |        | 2013 | 55,684      | (48,502 to 69,895) | 1279.9 | (1114.3 to 1609.6) |
|         | YLDs    | Ischemic Stroke    | Male   | 1990 | 671         | (441 to 954)       | 38.5   | (25.5 to 54.2)     |
|         |         |                    |        | 2013 | 761         | (485 to 1,099)     | 41.2   | (26.5 to 58.8)     |
|         |         |                    | Female | 1990 | 556         | (334 to 836)       | 23.8   | (14.4 to 35.6)     |
|         |         |                    |        | 2013 | 594         | (381 to 848)       | 24.4   | (15.6 to 34.6)     |
|         |         |                    | Both   | 1990 | 1,227       | (816 to 1,724)     | 30.1   | (20.1 to 42.1)     |
|         |         |                    |        |      | Counts, All | Ages               | Rate   | Per 100,000        |
|         |         |                    |        |      |             |                    | Age-   | standardized       |
| Country | measure | Stroke Type        | sex    | year | Mean        | 95% UI             | Mean   | 95% UI             |
|         |         |                    |        | 2013 | 1,355       | (905 to 1,862)     | 31.7   | (21.0 to 43.6)     |

|          |        |                    |        |      |        |                    |        |                    |
|----------|--------|--------------------|--------|------|--------|--------------------|--------|--------------------|
|          |        | Hemorrhagic Stroke | Male   | 1990 | 50     | (28 to 89)         | 2.8    | (1.5 to 4.8)       |
|          |        |                    |        | 2013 | 41     | (23 to 63)         | 2.2    | (1.3 to 3.5)       |
|          |        |                    | Female | 1990 | 38     | (19 to 69)         | 1.6    | (0.8 to 3.0)       |
|          |        |                    |        | 2013 | 42     | (22 to 71)         | 1.8    | (1.0 to 3.1)       |
|          |        |                    | Both   | 1990 | 89     | (53 to 139)        | 2.1    | (1.3 to 3.3)       |
|          |        |                    | Both   | 2013 | 83     | (49 to 125)        | 2      | (1.2 to 3.0)       |
| Mongolia | Deaths | Ischemic Stroke    | Male   | 1990 | 137    | (91 to 185)        | 38     | (25.6 to 51.5)     |
|          |        |                    |        | 2013 | 259    | (197 to 382)       | 54.6   | (42.0 to 78.5)     |
|          |        |                    | Female | 1990 | 148    | (110 to 218)       | 33.2   | (24.6 to 49.3)     |
|          |        |                    |        | 2013 | 283    | (199 to 359)       | 46.8   | (32.2 to 59.6)     |
|          |        |                    | Both   | 1990 | 285    | (220 to 379)       | 35.3   | (27.3 to 47.2)     |
|          |        |                    |        | 2013 | 543    | (445 to 700)       | 50.5   | (41.1 to 63.5)     |
|          | Deaths | Hemorrhagic Stroke | Male   | 1990 | 914    | (761 to 1,066)     | 209    | (175.0 to 243.8)   |
|          |        |                    |        | 2013 | 1,560  | (1,277 to 1,889)   | 248.3  | (205.0 to 296.4)   |
|          |        |                    | Female | 1990 | 969    | (821 to 1,166)     | 191.8  | (162.2 to 231.5)   |
|          |        |                    |        | 2013 | 1,508  | (1,145 to 1,831)   | 198.9  | (150.3 to 239.3)   |
|          |        |                    | Both   | 1990 | 1,883  | (1,663 to 2,116)   | 200    | (176.7 to 226.6)   |
|          |        |                    |        | 2013 | 3,068  | (2,600 to 3,506)   | 221.5  | (185.7 to 252.0)   |
|          | DALYs  | Ischemic Stroke    | Male   | 1990 | 2,726  | (1,894 to 3,798)   | 586.6  | (389.7 to 794.3)   |
|          |        |                    |        | 2013 | 5,770  | (4,321 to 8,993)   | 884.7  | (677.6 to 1297.6)  |
|          |        |                    | Female | 1990 | 2,773  | (2,117 to 3,977)   | 498.8  | (374.4 to 712.7)   |
|          |        |                    |        | 2013 | 5,079  | (3,791 to 6,737)   | 663.7  | (472.4 to 852.2)   |
|          |        |                    | Both   | 1990 | 5,499  | (4,298 to 7,382)   | 538.5  | (419.6 to 714.7)   |
|          |        |                    |        | 2013 | 10,850 | (8,903 to 14,567)  | 763.9  | (632.0 to 985.5)   |
|          |        | Hemorrhagic Stroke | Male   | 1990 | 24,197 | (19,975 to 28,432) | 4290.5 | (3561.8 to 4998.4) |
|          |        |                    |        | 2013 | 43,887 | (35,412 to 54,159) | 5186.3 | (4248.9 to 6254.0) |



|                  |         |                    |        |      |        |                    |        |                    |
|------------------|---------|--------------------|--------|------|--------|--------------------|--------|--------------------|
|                  |         |                    | Female | 1990 | 23,653 | (20,274 to 28,484) | 3772.3 | (3236.7 to 4578.8) |
|                  |         |                    |        | 2013 | 37,845 | (28,684 to 46,881) | 3858.3 | (2928.0 to 4689.5) |
|                  |         |                    | Both   | 1990 | 47,851 | (42,350 to 53,940) | 4018.4 | (3564.0 to 4530.3) |
|                  |         |                    |        | 2013 | 81,732 | (69,927 to 94,756) | 4464.9 | (3783.6 to 5103.7) |
|                  | YLDs    | Ischemic Stroke    | Male   | 1990 | 43     | (28 to 63)         | 8.3    | (5.5 to 12.1)      |
|                  |         |                    |        | 2013 | 61     | (36 to 92)         | 7.7    | (4.5 to 11.7)      |
|                  |         |                    | Female | 1990 | 42     | (26 to 61)         | 7.3    | (4.5 to 10.5)      |
|                  |         |                    |        | 2013 | 68     | (42 to 101)        | 7.4    | (4.6 to 11.1)      |
|                  |         |                    | Both   | 1990 | 86     | (56 to 118)        | 7.8    | (5.1 to 10.8)      |
|                  |         |                    |        | 2013 | 130    | (84 to 182)        | 7.6    | (4.9 to 10.6)      |
|                  |         | Hemorrhagic Stroke | Male   | 1990 | 55     | (35 to 78)         | 9.2    | (5.9 to 13.1)      |
| Counts, All Ages |         |                    |        |      |        |                    |        |                    |
|                  |         |                    |        |      |        |                    | Rate   | Per 100,000        |
|                  |         |                    |        |      |        |                    | Age-   | standardized       |
| Country          | measure | Stroke Type        | sex    | year | Mean   | 95% UI             | Mean   | 95% UI             |
|                  |         |                    |        | 2013 | 79     | (48 to 116)        | 8.1    | (4.9 to 11.7)      |
|                  |         |                    | Female | 1990 | 33     | (21 to 47)         | 5.1    | (3.2 to 7.3)       |
|                  |         |                    |        | 2013 | 50     | (31 to 74)         | 4.8    | (3.0 to 7.2)       |
|                  |         |                    | Both   | 1990 | 88     | (58 to 121)        | 7      | (4.7 to 9.7)       |
|                  |         |                    | Both   | 2013 | 130    | (82 to 183)        | 6.3    | (4.1 to 8.8)       |
| Montenegro       | Deaths  | Ischemic Stroke    | Male   | 1990 | 86     | (51 to 155)        | 41.6   | (24.9 to 74.4)     |
|                  |         |                    |        | 2013 | 188    | (123 to 243)       | 59     | (38.6 to 76.9)     |
|                  |         |                    | Female | 1990 | 109    | (71 to 191)        | 32.3   | (21.1 to 56.3)     |
|                  |         |                    |        | 2013 | 227    | (131 to 288)       | 49.9   | (28.9 to 63.4)     |
|                  |         |                    | Both   | 1990 | 195    | (133 to 333)       | 36     | (24.7 to 61.1)     |
|                  |         |                    |        | 2013 | 415    | (279 to 506)       | 53.8   | (35.7 to 65.9)     |
|                  | Deaths  | Hemorrhagic Stroke | Male   | 1990 | 443    | (336 to 549)       | 206.2  | (156.6 to 254.8)   |
|                  |         |                    |        | 2013 | 564    | (460 to 671)       | 172.7  | (141.1 to 205.3)   |

|  |       |                    |        |                  |        |                    |        |                    |
|--|-------|--------------------|--------|------------------|--------|--------------------|--------|--------------------|
|  |       |                    | Female | 1990             | 658    | (504 to 821)       | 197    | (150.0 to 246.3)   |
|  |       |                    |        | 2013             | 800    | (681 to 958)       | 177.8  | (150.7 to 213.8)   |
|  |       |                    | Both   | 1990             | 1,102  | (904 to 1,296)     | 202.4  | (167.0 to 237.9)   |
|  |       |                    |        | 2013             | 1,365  | (1,206 to 1,565)   | 177.1  | (156.3 to 203.7)   |
|  | DALYs | Ischemic Stroke    | Male   | 1990             | 1,468  | (857 to 2,727)     | 627.1  | (373.1 to 1128.6)  |
|  |       |                    |        | 2013             | 2,890  | (1,965 to 3,743)   | 828.8  | (566.1 to 1057.9)  |
|  |       |                    | Female | 1990             | 1,392  | (920 to 2,449)     | 435.5  | (287.4 to 766.7)   |
|  |       |                    |        | 2013             | 2,858  | (1,711 to 3,583)   | 626.2  | (379.5 to 783.5)   |
|  |       |                    | Both   | 1990             | 2,860  | (1,910 to 4,832)   | 517.4  | (346.5 to 873.1)   |
|  |       |                    |        | 2013             | 5,748  | (4,017 to 6,970)   | 717.6  | (501.2 to 867.9)   |
|  |       | Hemorrhagic Stroke | Male   | 1990             | 8,935  | (6,698 to 11,273)  | 3639.1 | (2756.9 to 4552.5) |
|  |       |                    |        | 2013             | 9,432  | (7,535 to 11,334)  | 2688.8 | (2160.1 to 3233.7) |
|  |       |                    | Female | 1990             | 9,442  | (6,763 to 11,954)  | 2988   | (2141.6 to 3796.7) |
|  |       |                    |        | 2013             | 10,574 | (8,830 to 12,657)  | 2381.1 | (1989.0 to 2848.9) |
|  |       |                    | Both   | 1990             | 18,378 | (14,564 to 21,759) | 3295.4 | (2628.5 to 3900.4) |
|  |       |                    |        | 2013             | 20,007 | (17,454 to 22,823) | 2535.5 | (2213.7 to 2898.1) |
|  | YLDs  | Ischemic Stroke    | Male   | 1990             | 60     | (39 to 85)         | 23.5   | (15.5 to 33.4)     |
|  |       |                    |        | 2013             | 92     | (57 to 129)        | 25     | (15.7 to 35.0)     |
|  |       |                    | Female | 1990             | 47     | (30 to 67)         | 14.9   | (9.6 to 21.3)      |
|  |       |                    |        | 2013             | 63     | (40 to 91)         | 14.8   | (9.5 to 21.1)      |
|  |       |                    | Both   | 1990             | 107    | (73 to 145)        | 18.7   | (12.9 to 25.3)     |
|  |       |                    |        | 2013             | 156    | (103 to 218)       | 19.5   | (13.0 to 27.1)     |
|  |       | Hemorrhagic Stroke | Male   | 1990             | 15     | (9 to 23)          | 5.8    | (3.7 to 8.4)       |
|  |       |                    |        | 2013             | 21     | (12 to 32)         | 5.9    | (3.5 to 9.0)       |
|  |       |                    | Female | 1990             | 13     | (7 to 19)          | 4.1    | (2.5 to 6.1)       |
|  |       |                    |        | 2013             | 16     | (9 to 24)          | 4      | (2.5 to 6.0)       |
|  |       |                    |        | Counts, All Ages |        | Rate Per 100,000   |        |                    |

| Country | measure | Stroke Type        | sex    | year | Age- standardized |                      |        |                   |
|---------|---------|--------------------|--------|------|-------------------|----------------------|--------|-------------------|
|         |         |                    |        |      | Mean              | 95% UI               | Mean   | 95% UI            |
|         |         |                    | Both   | 1990 | 28                | (18 to 40)           | 4.9    | (3.2 to 6.8)      |
|         |         |                    | Both   | 2013 | 37                | (23 to 53)           | 4.9    | (3.1 to 7.0)      |
| Morocco | Deaths  | Ischemic Stroke    | Male   | 1990 | 2,233             | (1,737 to 2,857)     | 68.6   | (52.5 to 87.0)    |
|         |         |                    |        | 2013 | 3,206             | (2,438 to 4,271)     | 45.5   | (34.7 to 59.4)    |
|         |         |                    | Female | 1990 | 2,779             | (2,045 to 3,271)     | 68.6   | (49.8 to 82.6)    |
|         |         |                    |        | 2013 | 4,744             | (3,541 to 6,340)     | 50.2   | (37.6 to 66.2)    |
|         |         |                    | Both   | 1990 | 5,012             | (4,062 to 5,777)     | 68.8   | (55.0 to 79.4)    |
|         |         |                    |        | 2013 | 7,950             | (6,526 to 9,828)     | 48.4   | (39.8 to 59.5)    |
|         | Deaths  | Hemorrhagic Stroke | Male   | 1990 | 1,962             | (1,471 to 2,524)     | 37.8   | (26.7 to 50.7)    |
|         |         |                    |        | 2013 | 2,367             | (1,768 to 3,248)     | 25.9   | (19.2 to 35.8)    |
|         |         |                    | Female | 1990 | 2,530             | (1,990 to 3,151)     | 43.9   | (33.4 to 55.5)    |
|         |         |                    |        | 2013 | 3,244             | (2,442 to 4,551)     | 29.5   | (21.9 to 41.3)    |
|         |         |                    | Both   | 1990 | 4,493             | (3,711 to 5,329)     | 41.4   | (32.7 to 50.3)    |
|         |         |                    |        | 2013 | 5,612             | (4,571 to 7,206)     | 28     | (22.7 to 36.3)    |
|         | DALYs   | Ischemic Stroke    | Male   | 1990 | 46,640            | (35,787 to 61,305)   | 1010.3 | (785.2 to 1287.6) |
|         |         |                    |        | 2013 | 57,113            | (42,672 to 77,032)   | 647.4  | (493.4 to 864.3)  |
|         |         |                    | Female | 1990 | 48,803            | (36,396 to 59,361)   | 917.9  | (682.4 to 1081.7) |
|         |         |                    |        | 2013 | 71,005            | (52,348 to 96,138)   | 663.4  | (492.9 to 893.9)  |
|         |         |                    | Both   | 1990 | 95,444            | (78,809 to 113,768)  | 961.2  | (783.8 to 1110.0) |
|         |         |                    |        | 2013 | 128,118           | (104,463 to 160,843) | 658.6  | (536.8 to 822.4)  |
|         |         | Hemorrhagic Stroke | Male   | 1990 | 76,909            | (58,307 to 101,217)  | 895.4  | (675.7 to 1148.2) |
|         |         |                    |        | 2013 | 68,989            | (51,782 to 95,731)   | 557.3  | (417.8 to 769.2)  |
|         |         |                    | Female | 1990 | 82,937            | (63,269 to 109,622)  | 964.5  | (762.5 to 1190.8) |

|            |         |                    |        |      |             |                      |       |                   |
|------------|---------|--------------------|--------|------|-------------|----------------------|-------|-------------------|
|            |         |                    |        | 2013 | 80,742      | (60,409 to 110,669)  | 608.3 | (455.8 to 839.0)  |
|            |         |                    | Both   | 1990 | 159,847     | (132,693 to 191,866) | 936.2 | (779.2 to 1109.1) |
|            |         |                    |        | 2013 | 149,732     | (121,605 to 189,350) | 585.4 | (477.8 to 743.2)  |
|            | YLDs    | Ischemic Stroke    | Male   | 1990 | 515         | (319 to 734)         | 9.2   | (5.7 to 13.0)     |
|            |         |                    |        | 2013 | 1,070       | (671 to 1,562)       | 9.6   | (6.1 to 13.9)     |
|            |         |                    | Female | 1990 | 503         | (321 to 718)         | 7.7   | (5.0 to 10.9)     |
|            |         |                    |        | 2013 | 1,005       | (624 to 1,450)       | 8     | (5.0 to 11.3)     |
|            |         |                    | Both   | 1990 | 1,018       | (670 to 1,417)       | 8.4   | (5.5 to 11.7)     |
|            |         |                    |        | 2013 | 2,076       | (1,381 to 2,856)     | 8.7   | (5.8 to 11.8)     |
|            |         | Hemorrhagic Stroke | Male   | 1990 | 76          | (42 to 125)          | 1.1   | (0.6 to 1.9)      |
|            |         |                    |        | 2013 | 152         | (88 to 223)          | 1.2   | (0.7 to 1.8)      |
|            |         |                    | Female | 1990 | 93          | (55 to 144)          | 1.3   | (0.8 to 2.0)      |
|            |         |                    |        |      | Counts, All | Ages                 | Rate  | Per 100,000       |
|            |         |                    |        |      |             |                      | Age-  | standardized      |
| Country    | measure | Stroke Type        | sex    | year | Mean        | 95% UI               | Mean  | 95% UI            |
|            |         |                    |        | 2013 | 188         | (110 to 290)         | 1.4   | (0.8 to 2.2)      |
|            |         |                    | Both   | 1990 | 170         | (109 to 249)         | 1.2   | (0.8 to 1.8)      |
|            |         |                    | Both   | 2013 | 340         | (212 to 491)         | 1.3   | (0.8 to 1.9)      |
| Mozambique | Deaths  | Ischemic Stroke    | Male   | 1990 | 766         | (258 to 1,254)       | 41.8  | (13.8 to 66.3)    |
|            |         |                    |        | 2013 | 2,248       | (1,226 to 3,200)     | 64    | (34.8 to 91.2)    |
|            |         |                    | Female | 1990 | 982         | (467 to 1,464)       | 44.4  | (20.2 to 66.6)    |
|            |         |                    |        | 2013 | 2,350       | (1,253 to 3,504)     | 54.6  | (28.5 to 80.9)    |
|            |         |                    | Both   | 1990 | 1,748       | (996 to 2,403)       | 43.6  | (24.2 to 60.5)    |
|            |         |                    |        | 2013 | 4,598       | (2,880 to 6,179)     | 59    | (36.8 to 79.8)    |
|            | Deaths  | Hemorrhagic Stroke | Male   | 1990 | 1,164       | (638 to 1,671)       | 49.1  | (24.1 to 76.3)    |

|  |       |                    |        |      |         |                      |        |                   |
|--|-------|--------------------|--------|------|---------|----------------------|--------|-------------------|
|  |       |                    |        | 2013 | 2,864   | (1,960 to 4,084)     | 66.5   | (43.1 to 97.8)    |
|  |       |                    | Female | 1990 | 1,345   | (840 to 1,925)       | 48.2   | (28.2 to 74.4)    |
|  |       |                    |        | 2013 | 2,548   | (1,653 to 3,679)     | 50.7   | (31.9 to 76.3)    |
|  |       |                    | Both   | 1990 | 2,510   | (1,699 to 3,295)     | 48.9   | (30.5 to 68.5)    |
|  |       |                    |        | 2013 | 5,413   | (3,887 to 7,149)     | 58     | (39.4 to 79.1)    |
|  | DALYs | Ischemic Stroke    | Male   | 1990 | 16,798  | (6,200 to 27,371)    | 708.3  | (242.8 to 1149.1) |
|  |       |                    |        | 2013 | 44,810  | (24,689 to 63,151)   | 1055.5 | (576.9 to 1496.5) |
|  |       |                    | Female | 1990 | 17,504  | (8,671 to 26,428)    | 632.1  | (304.7 to 941.4)  |
|  |       |                    |        | 2013 | 36,595  | (20,343 to 54,768)   | 729.2  | (394.4 to 1091.8) |
|  |       |                    | Both   | 1990 | 34,303  | (19,835 to 47,025)   | 669    | (382.1 to 919.9)  |
|  |       |                    |        | 2013 | 81,406  | (53,082 to 107,215)  | 876.2  | (565.0 to 1163.2) |
|  |       | Hemorrhagic Stroke | Male   | 1990 | 33,262  | (20,380 to 45,244)   | 1095.1 | (607.5 to 1563.8) |
|  |       |                    |        | 2013 | 75,542  | (53,655 to 102,974)  | 1440.3 | (996.7 to 2029.8) |
|  |       |                    | Female | 1990 | 32,766  | (21,641 to 44,631)   | 922    | (582.3 to 1293.8) |
|  |       |                    |        | 2013 | 55,359  | (38,639 to 75,887)   | 905.6  | (608.6 to 1276.6) |
|  |       |                    | Both   | 1990 | 66,029  | (46,656 to 83,186)   | 1001.8 | (684.5 to 1301.4) |
|  |       |                    |        | 2013 | 130,901 | (101,085 to 164,073) | 1147   | (852.3 to 1484.1) |
|  | YLDs  | Ischemic Stroke    | Male   | 1990 | 286     | (187 to 412)         | 9.9    | (6.4 to 14.0)     |
|  |       |                    |        | 2013 | 581     | (363 to 866)         | 10.7   | (6.7 to 15.9)     |
|  |       |                    | Female | 1990 | 256     | (156 to 377)         | 7.1    | (4.2 to 10.4)     |
|  |       |                    |        | 2013 | 510     | (309 to 760)         | 7.6    | (4.6 to 11.3)     |
|  |       |                    | Both   | 1990 | 542     | (361 to 763)         | 8.3    | (5.6 to 11.6)     |
|  |       |                    |        | 2013 | 1,092   | (717 to 1,545)       | 9      | (5.9 to 12.7)     |
|  |       | Hemorrhagic Stroke | Male   | 1990 | 102     | (64 to 149)          | 3      | (1.8 to 4.3)      |
|  |       |                    |        | 2013 | 203     | (126 to 311)         | 3      | (1.8 to 4.6)      |

|                  |         |                    | Female | 1990 | 80      | (51 to 124)          | 2      | (1.2 to 3.0)       |
|------------------|---------|--------------------|--------|------|---------|----------------------|--------|--------------------|
|                  |         |                    |        | 2013 | 151     | (91 to 225)          | 2      | (1.2 to 3.0)       |
| Counts, All Ages |         |                    |        |      |         |                      |        |                    |
| Rate Per 100,000 |         |                    |        |      |         |                      |        |                    |
| Age-standardized |         |                    |        |      |         |                      |        |                    |
| Country          | measure | Stroke Type        | sex    | year | Mean    | 95% UI               | Mean   | 95% UI             |
|                  |         |                    | Both   | 1990 | 182     | (118 to 260)         | 2.4    | (1.6 to 3.4)       |
|                  |         |                    | Both   | 2013 | 354     | (225 to 511)         | 2.4    | (1.6 to 3.5)       |
| Myanmar          | Deaths  | Ischemic Stroke    | Male   | 1990 | 8,657   | (4,555 to 13,670)    | 125.1  | (68.6 to 185.0)    |
|                  |         |                    |        | 2013 | 13,332  | (5,690 to 21,192)    | 117    | (51.4 to 175.3)    |
|                  |         |                    | Female | 1990 | 10,074  | (5,094 to 17,164)    | 116.8  | (60.2 to 192.9)    |
|                  |         |                    |        | 2013 | 14,600  | (4,687 to 22,481)    | 100.7  | (32.1 to 152.7)    |
|                  |         |                    | Both   | 1990 | 18,731  | (10,463 to 28,579)   | 121    | (69.2 to 177.2)    |
|                  |         |                    |        | 2013 | 27,933  | (12,648 to 41,425)   | 108.1  | (49.5 to 155.2)    |
|                  | Deaths  | Hemorrhagic Stroke | Male   | 1990 | 11,161  | (6,397 to 17,958)    | 123.8  | (71.4 to 195.6)    |
|                  |         |                    |        | 2013 | 14,548  | (7,656 to 25,744)    | 96.5   | (51.0 to 176.3)    |
|                  |         |                    | Female | 1990 | 11,585  | (6,348 to 19,518)    | 115.2  | (65.4 to 191.4)    |
|                  |         |                    |        | 2013 | 13,985  | (7,069 to 25,704)    | 81.6   | (41.2 to 153.2)    |
|                  |         |                    | Both   | 1990 | 22,746  | (13,928 to 35,408)   | 120    | (75.7 to 181.2)    |
|                  |         |                    |        | 2013 | 28,533  | (15,667 to 48,075)   | 88.7   | (50.6 to 155.3)    |
|                  | DALYs   | Ischemic Stroke    | Male   | 1990 | 174,875 | (90,082 to 291,835)  | 1970.7 | (1046.0 to 3112.7) |
|                  |         |                    |        | 2013 | 244,522 | (98,413 to 417,295)  | 1718   | (744.6 to 2738.4)  |
|                  |         |                    | Female | 1990 | 167,062 | (77,633 to 302,914)  | 1640.5 | (814.6 to 2856.8)  |
|                  |         |                    |        | 2013 | 214,316 | (68,905 to 347,862)  | 1287.3 | (419.0 to 2003.9)  |
|                  |         |                    | Both   | 1990 | 341,938 | (184,266 to 543,429) | 1798.1 | (1000.2 to 2759.5) |

|         |         |                    |        |      |             |                        |        |                    |
|---------|---------|--------------------|--------|------|-------------|------------------------|--------|--------------------|
|         |         |                    |        | 2013 | 458,838     | (208,517 to 731,173)   | 1482.3 | (682.5 to 2241.3)  |
|         |         | Hemorrhagic Stroke | Male   | 1990 | 317,092     | (185,612 to 494,966)   | 2728.3 | (1587.0 to 4335.8) |
|         |         |                    |        | 2013 | 388,127     | (203,176 to 670,039)   | 2038.5 | (1086.3 to 3512.7) |
|         |         |                    | Female | 1990 | 258,287     | (135,903 to 439,664)   | 2158.9 | (1158.6 to 3629.8) |
|         |         |                    |        | 2013 | 298,066     | (149,530 to 526,591)   | 1446.9 | (727.7 to 2626.1)  |
|         |         |                    | Both   | 1990 | 575,380     | (347,073 to 903,983)   | 2439.2 | (1483.7 to 3772.3) |
|         |         |                    |        | 2013 | 686,193     | (370,227 to 1,120,966) | 1725   | (948.3 to 2839.9)  |
|         | YLDs    | Ischemic Stroke    | Male   | 1990 | 2,335       | (1,446 to 3,373)       | 25.9   | (16.4 to 37.2)     |
|         |         |                    |        | 2013 | 4,392       | (2,742 to 6,355)       | 29.1   | (18.9 to 41.4)     |
|         |         |                    | Female | 1990 | 2,384       | (1,479 to 3,505)       | 21.7   | (13.7 to 31.7)     |
|         |         |                    |        | 2013 | 4,388       | (2,887 to 6,296)       | 23.4   | (15.3 to 33.3)     |
|         |         |                    | Both   | 1990 | 4,720       | (3,181 to 6,508)       | 23.5   | (15.8 to 32.4)     |
|         |         |                    |        | 2013 | 8,781       | (5,927 to 12,030)      | 25.9   | (17.6 to 35.2)     |
|         |         |                    |        |      | Counts, All | Ages                   | Rate   | Per 100,000        |
|         |         |                    |        |      |             |                        | Age-   | standardized       |
| Country | measure | Stroke Type        | sex    | year | Mean        | 95% UI                 | Mean   | 95% UI             |
|         |         | Hemorrhagic Stroke | Male   | 1990 | 2,887       | (1,836 to 4,138)       | 28.5   | (18.2 to 40.2)     |
|         |         |                    |        | 2013 | 5,275       | (3,388 to 7,541)       | 31.3   | (20.6 to 44.7)     |
|         |         |                    | Female | 1990 | 2,539       | (1,685 to 3,594)       | 21.3   | (14.1 to 30.1)     |
|         |         |                    |        | 2013 | 4,478       | (2,926 to 6,275)       | 22     | (14.5 to 30.6)     |
|         |         |                    | Both   | 1990 | 5,427       | (3,737 to 7,447)       | 24.5   | (16.8 to 33.6)     |
|         |         |                    | Both   | 2013 | 9,753       | (6,721 to 13,280)      | 26.1   | (18.2 to 35.4)     |

|         |                    |                    |                    |                   |                    |                    |                    |                 |
|---------|--------------------|--------------------|--------------------|-------------------|--------------------|--------------------|--------------------|-----------------|
| Namibia | Deaths             | Ischemic Stroke    | Male               | 1990              | 129                | (82 to 171)        | 68.4               | (43.7 to 90.9)  |
|         |                    |                    |                    | 2013              | 275                | (194 to 349)       | 83.5               | (59.5 to 105.0) |
|         |                    |                    | Female             | 1990              | 187                | (127 to 265)       | 76.5               | (52.7 to 108.9) |
|         |                    | 2013               | 350                | (221 to 460)      | 79.2               | (51.0 to 104.5)    |                    |                 |
|         |                    | Both               | 1990               | 316               | (236 to 411)       | 73.6               | (55.3 to 96.0)     |                 |
|         |                    | 2013               | 625                | (454 to 753)      | 81.5               | (59.2 to 98.7)     |                    |                 |
|         | Deaths             | Hemorrhagic Stroke | Male               | 1990              | 192                | (140 to 246)       | 86.4               | (61.1 to 110.7) |
|         |                    |                    |                    | 2013              | 322                | (240 to 439)       | 78.1               | (58.2 to 107.9) |
|         |                    |                    | Female             | 1990              | 248                | (174 to 302)       | 90.1               | (62.4 to 110.8) |
|         |                    | 2013               | 384                | (292 to 558)      | 74.8               | (57.0 to 109.9)    |                    |                 |
|         |                    | Both               | 1990               | 441               | (333 to 522)       | 88.9               | (65.7 to 106.0)    |                 |
|         |                    | 2013               | 706                | (573 to 927)      | 76.7               | (61.8 to 103.3)    |                    |                 |
| DALYs   | Ischemic Stroke    | Male               | 1990               | 2,614             | (1,625 to 3,513)   | 1106.5             | (706.3 to 1469.0)  |                 |
|         |                    |                    | 2013               | 5,613             | (3,882 to 7,253)   | 1365.6             | (965.3 to 1729.1)  |                 |
|         |                    | Female             | 1990               | 3,253             | (2,133 to 4,715)   | 1125.8             | (763.3 to 1599.1)  |                 |
|         | 2013               | 5,685              | (3,506 to 7,508)   | 1101.2            | (686.7 to 1447.0)  |                    |                    |                 |
|         | Both               | 1990               | 5,867              | (4,319 to 7,729)  | 1123.7             | (838.7 to 1456.4)  |                    |                 |
|         | 2013               | 11,299             | (8,105 to 13,824)  | 1218.5            | (885.9 to 1474.3)  |                    |                    |                 |
|         | Hemorrhagic Stroke | Male               | 1990               | 4,918             | (3,645 to 6,210)   | 1679.8             | (1222.0 to 2140.3) |                 |
|         |                    |                    | 2013               | 8,913             | (6,560 to 12,020)  | 1629.9             | (1209.7 to 2228.2) |                 |
|         |                    | Female             | 1990               | 5,497             | (3,887 to 6,716)   | 1631.4             | (1154.9 to 1979.6) |                 |
|         | 2013               | 8,687              | (6,508 to 12,656)  | 1354.2            | (1018.3 to 1981.3) |                    |                    |                 |
|         | Both               | 1990               | 10,415             | (8,018 to 12,181) | 1658               | (1266.3 to 1951.1) |                    |                 |
|         | 2013               | 17,600             | (14,152 to 22,771) | 1481.5            | (1199.2 to 1944.4) |                    |                    |                 |
| YLDs    | Ischemic Stroke    | Male               | 1990               | 56                | (35 to 80)         | 19.4               | (12.4 to 27.3)     |                 |
|         |                    |                    | 2013               | 98                | (63 to 143)        | 19                 | (12.2 to 27.5)     |                 |
|         |                    | Female             | 1990               | 62                | (39 to 88)         | 17.9               | (11.4 to 25.7)     |                 |



|         |         |                    |        |      |             |                     |       |                   |
|---------|---------|--------------------|--------|------|-------------|---------------------|-------|-------------------|
|         |         |                    |        | 2013 | 115         | (73 to 169)         | 17.3  | (10.9 to 25.7)    |
|         |         |                    | Both   | 1990 | 119         | (79 to 162)         | 18.6  | (12.6 to 25.6)    |
|         |         |                    |        | 2013 | 214         | (142 to 299)        | 18    | (12.0 to 25.4)    |
|         |         | Hemorrhagic Stroke | Male   | 1990 | 17          | (10 to 25)          | 5.1   | (3.2 to 7.5)      |
|         |         |                    |        | 2013 | 31          | (18 to 45)          | 5.1   | (3.1 to 7.5)      |
|         |         |                    |        |      | Counts, All | Ages                | Rate  | Per 100,000       |
|         |         |                    |        |      |             |                     | Age-  | standardized      |
| Country | measure | Stroke Type        | sex    | year | Mean        | 95% UI              | Mean  | 95% UI            |
|         |         |                    | Female | 1990 | 17          | (10 to 25)          | 4.3   | (2.7 to 6.3)      |
|         |         |                    |        | 2013 | 31          | (19 to 46)          | 4.1   | (2.6 to 6.3)      |
|         |         |                    | Both   | 1990 | 34          | (23 to 48)          | 4.7   | (3.1 to 6.7)      |
|         |         |                    | Both   | 2013 | 62          | (40 to 86)          | 4.5   | (3.0 to 6.3)      |
| Nepal   | Deaths  | Ischemic Stroke    | Male   | 1990 | 1,421       | (627 to 2,523)      | 54.7  | (24.7 to 90.3)    |
|         |         |                    |        | 2013 | 3,873       | (1,930 to 6,012)    | 69.5  | (35.4 to 104.2)   |
|         |         |                    | Female | 1990 | 1,336       | (662 to 2,687)      | 46.5  | (24.0 to 87.5)    |
|         |         |                    |        | 2013 | 4,179       | (2,129 to 6,045)    | 67.8  | (35.2 to 96.3)    |
|         |         |                    | Both   | 1990 | 2,757       | (1,660 to 4,142)    | 50.3  | (30.8 to 72.3)    |
|         |         |                    |        | 2013 | 8,052       | (5,139 to 10,650)   | 68.7  | (45.6 to 88.7)    |
|         | Deaths  | Hemorrhagic Stroke | Male   | 1990 | 1,741       | (843 to 2,784)      | 49.8  | (20.4 to 84.9)    |
|         |         |                    |        | 2013 | 3,901       | (2,261 to 6,025)    | 57.7  | (32.5 to 93.2)    |
|         |         |                    | Female | 1990 | 1,602       | (999 to 2,780)      | 43.2  | (24.7 to 76.2)    |
|         |         |                    |        | 2013 | 4,143       | (2,131 to 6,277)    | 57.1  | (28.6 to 87.6)    |
|         |         |                    | Both   | 1990 | 3,344       | (2,156 to 4,759)    | 46.3  | (27.2 to 68.5)    |
|         |         |                    |        | 2013 | 8,044       | (5,067 to 11,047)   | 57.3  | (35.8 to 79.9)    |
|         | DALYs   | Ischemic Stroke    | Male   | 1990 | 29,325      | (13,620 to 54,521)  | 826.7 | (383.4 to 1458.7) |
|         |         |                    |        | 2013 | 66,566      | (32,292 to 107,443) | 953.2 | (478.5 to 1489.3) |

|         |         |                    |        |      |             |                      |        |                   |
|---------|---------|--------------------|--------|------|-------------|----------------------|--------|-------------------|
|         |         |                    | Female | 1990 | 25,098      | (12,692 to 52,373)   | 670.6  | (339.9 to 1338.4) |
|         |         |                    |        | 2013 | 64,927      | (32,516 to 99,587)   | 880.4  | (456.3 to 1295.9) |
|         |         |                    | Both   | 1990 | 54,424      | (31,816 to 83,252)   | 744.6  | (452.3 to 1107.8) |
|         |         |                    |        | 2013 | 131,493     | (83,523 to 181,364)  | 915.9  | (581.3 to 1217.4) |
|         |         | Hemorrhagic Stroke | Male   | 1990 | 49,980      | (29,223 to 75,701)   | 1030.7 | (512.9 to 1633.7) |
|         |         |                    |        | 2013 | 91,651      | (56,181 to 135,001)  | 1077.2 | (647.0 to 1607.3) |
|         |         |                    | Female | 1990 | 40,930      | (27,048 to 69,323)   | 843.1  | (537.5 to 1447.6) |
|         |         |                    |        | 2013 | 87,975      | (46,885 to 132,704)  | 1010.2 | (534.9 to 1520.3) |
|         |         |                    | Both   | 1990 | 90,911      | (63,882 to 123,466)  | 933.8  | (616.3 to 1318.2) |
|         |         |                    |        | 2013 | 179,627     | (116,731 to 241,964) | 1040.1 | (662.9 to 1405.0) |
|         | YLDs    | Ischemic Stroke    | Male   | 1990 | 1,220       | (740 to 1,811)       | 27.5   | (17.0 to 40.5)    |
|         |         |                    |        | 2013 | 2,513       | (1,661 to 3,544)     | 28.8   | (19.2 to 41.1)    |
|         |         |                    | Female | 1990 | 1,168       | (729 to 1,657)       | 24.4   | (15.0 to 34.5)    |
|         |         |                    |        | 2013 | 2,217       | (1,424 to 3,141)     | 23.9   | (15.3 to 33.9)    |
|         |         |                    | Both   | 1990 | 2,389       | (1,550 to 3,344)     | 25.8   | (16.9 to 36.0)    |
|         |         |                    |        | 2013 | 4,731       | (3,219 to 6,399)     | 26.2   | (17.8 to 35.6)    |
|         |         | Hemorrhagic Stroke | Male   | 1990 | 690         | (445 to 1,001)       | 14.1   | (9.1 to 20.5)     |
|         |         |                    |        |      | Counts, All | Ages                 | Rate   | Per 100,000       |
|         |         |                    |        |      |             |                      | Age-   | standardized      |
| Country | measure | Stroke Type        | sex    | year | Mean        | 95% UI               | Mean   | 95% UI            |
|         |         |                    |        | 2013 | 1,327       | (826 to 1,881)       | 14.5   | (9.1 to 20.5)     |
|         |         |                    | Female | 1990 | 573         | (351 to 832)         | 11     | (6.8 to 15.7)     |
|         |         |                    |        | 2013 | 1,055       | (668 to 1,502)       | 10.6   | (6.7 to 15.3)     |

|             |        |                    |        |      |        |                     |       |                  |
|-------------|--------|--------------------|--------|------|--------|---------------------|-------|------------------|
|             |        |                    | Both   | 1990 | 1,264  | (826 to 1,754)      | 12.5  | (8.1 to 17.1)    |
|             |        |                    | Both   | 2013 | 2,382  | (1,596 to 3,285)    | 12.5  | (8.3 to 17.2)    |
| Netherlands | Deaths | Ischemic Stroke    | Male   | 1990 | 3,028  | (2,424 to 3,793)    | 44.3  | (35.4 to 55.3)   |
|             |        |                    |        | 2013 | 2,462  | (1,764 to 3,151)    | 20.8  | (15.0 to 26.8)   |
|             |        |                    | Female | 1990 | 4,623  | (3,481 to 5,375)    | 36.3  | (27.3 to 42.0)   |
|             |        |                    |        | 2013 | 4,273  | (3,204 to 6,078)    | 22.4  | (17.0 to 32.3)   |
|             |        |                    | Both   | 1990 | 7,652  | (6,457 to 8,726)    | 39.6  | (33.5 to 45.2)   |
|             |        |                    |        | 2013 | 6,735  | (5,365 to 8,383)    | 22.1  | (17.7 to 27.3)   |
|             | Deaths | Hemorrhagic Stroke | Male   | 1990 | 2,138  | (1,684 to 2,714)    | 29.7  | (23.3 to 37.9)   |
|             |        |                    |        | 2013 | 2,083  | (1,407 to 2,707)    | 17.5  | (11.8 to 22.9)   |
|             |        |                    | Female | 1990 | 2,918  | (2,128 to 3,666)    | 24.9  | (18.6 to 31.2)   |
|             |        |                    |        | 2013 | 3,064  | (2,117 to 4,471)    | 17.7  | (12.4 to 25.1)   |
|             |        |                    | Both   | 1990 | 5,057  | (4,135 to 6,017)    | 27    | (22.2 to 32.0)   |
|             |        |                    |        | 2013 | 5,148  | (3,831 to 6,678)    | 17.7  | (13.4 to 22.7)   |
|             | DALYs  | Ischemic Stroke    | Male   | 1990 | 44,196 | (36,548 to 54,821)  | 606.7 | (501.4 to 749.6) |
|             |        |                    |        | 2013 | 34,861 | (26,870 to 42,879)  | 288.4 | (222.0 to 354.6) |
|             |        |                    | Female | 1990 | 48,929 | (38,491 to 56,427)  | 417.3 | (328.0 to 484.6) |
|             |        |                    |        | 2013 | 41,695 | (32,713 to 57,339)  | 250.8 | (198.6 to 342.5) |
|             |        |                    | Both   | 1990 | 93,125 | (81,107 to 105,610) | 496.8 | (434.2 to 566.3) |
|             |        |                    |        | 2013 | 76,557 | (63,906 to 92,325)  | 269.9 | (225.6 to 324.8) |
|             |        | Hemorrhagic Stroke | Male   | 1990 | 39,206 | (31,594 to 48,534)  | 513.4 | (412.1 to 638.3) |
|             |        |                    |        | 2013 | 31,939 | (23,261 to 39,965)  | 268.9 | (194.9 to 336.6) |
|             |        |                    | Female | 1990 | 41,272 | (32,262 to 50,950)  | 407.6 | (322.4 to 508.1) |
|             |        |                    |        | 2013 | 37,385 | (27,489 to 51,295)  | 263.5 | (197.6 to 352.2) |
|             |        |                    | Both   | 1990 | 80,478 | (69,056 to 93,054)  | 452.4 | (388.2 to 521.9) |
|             |        |                    |        | 2013 | 69,324 | (55,479 to 84,566)  | 265.1 | (213.3 to 320.9) |

|                  |         |                    |        |      |        |                   |      |                |
|------------------|---------|--------------------|--------|------|--------|-------------------|------|----------------|
|                  | YLDs    | Ischemic Stroke    | Male   | 1990 | 4,881  | (3,256 to 6,774)  | 64.4 | (43.2 to 89.3) |
|                  |         |                    |        | 2013 | 6,996  | (4,416 to 10,056) | 57.4 | (36.5 to 82.7) |
|                  |         |                    | Female | 1990 | 5,165  | (3,405 to 7,437)  | 48.8 | (32.5 to 70.3) |
|                  |         |                    |        | 2013 | 6,579  | (4,307 to 9,245)  | 44.9 | (29.8 to 62.4) |
|                  |         |                    | Both   | 1990 | 10,046 | (6,715 to 13,727) | 55.4 | (37.0 to 75.5) |
|                  |         |                    |        | 2013 | 13,575 | (8,981 to 18,652) | 50.7 | (33.5 to 69.8) |
|                  |         | Hemorrhagic Stroke | Male   | 1990 | 1,123  | (698 to 1,732)    | 14.6 | (9.1 to 22.5)  |
|                  |         |                    |        | 2013 | 1,794  | (1,035 to 2,723)  | 15.3 | (9.0 to 22.8)  |
|                  |         |                    | Female | 1990 | 1,221  | (662 to 1,873)    | 12.3 | (6.9 to 18.5)  |
| Counts, All Ages |         |                    |        |      |        |                   |      |                |
|                  |         |                    |        |      |        |                   | Rate | Per 100,000    |
|                  |         |                    |        |      |        |                   | Age- | standardized   |
| Country          | measure | Stroke Type        | sex    | year | Mean   | 95% UI            | Mean | 95% UI         |
|                  |         |                    |        | 2013 | 1,525  | (956 to 2,291)    | 11.5 | (7.3 to 17.1)  |
|                  |         |                    | Both   | 1990 | 2,345  | (1,460 to 3,367)  | 13.2 | (8.3 to 19.0)  |
|                  |         |                    | Both   | 2013 | 3,320  | (2,119 to 4,695)  | 13.1 | (8.4 to 18.6)  |
| New Zealand      | Deaths  | Ischemic Stroke    | Male   | 1990 | 700    | (568 to 874)      | 52   | (42.4 to 65.0) |
|                  |         |                    |        | 2013 | 748    | (544 to 956)      | 25.2 | (18.3 to 32.1) |
|                  |         |                    | Female | 1990 | 1,100  | (860 to 1,333)    | 49   | (38.3 to 59.4) |
|                  |         |                    |        | 2013 | 1,218  | (881 to 1,495)    | 29.4 | (21.2 to 35.8) |
|                  |         |                    | Both   | 1990 | 1,800  | (1,541 to 2,064)  | 50.8 | (43.4 to 58.4) |
|                  |         |                    |        | 2013 | 1,966  | (1,544 to 2,321)  | 27.8 | (21.8 to 32.7) |
|                  | Deaths  | Hemorrhagic Stroke | Male   | 1990 | 366    | (290 to 474)      | 24.3 | (19.1 to 31.8) |
|                  |         |                    |        | 2013 | 383    | (261 to 498)      | 13.3 | (9.0 to 17.2)  |
|                  |         |                    | Female | 1990 | 509    | (412 to 676)      | 25.2 | (20.5 to 33.0) |
|                  |         |                    |        | 2013 | 550    | (372 to 731)      | 15.1 | (10.6 to 19.6) |
|                  |         |                    | Both   | 1990 | 876    | (766 to 1,085)    | 24.9 | (21.7 to 30.7) |
|                  |         |                    |        | 2013 | 933    | (713 to 1,128)    | 14.3 | (11.1 to 17.0) |

|         |         |                    |        |      |                  |                    |       |                  |
|---------|---------|--------------------|--------|------|------------------|--------------------|-------|------------------|
|         | DALYs   | Ischemic Stroke    | Male   | 1990 | 9,658            | (8,041 to 11,823)  | 659.1 | (547.5 to 810.1) |
|         |         |                    |        | 2013 | 8,123            | (6,133 to 10,071)  | 283.4 | (213.3 to 350.2) |
|         |         |                    | Female | 1990 | 11,058           | (8,911 to 13,280)  | 505.4 | (406.6 to 605.5) |
|         |         |                    |        | 2013 | 9,637            | (7,137 to 11,510)  | 257.2 | (192.2 to 300.7) |
|         |         |                    | Both   | 1990 | 20,717           | (18,324 to 23,800) | 575.6 | (508.8 to 662.6) |
|         |         |                    |        | 2013 | 17,760           | (14,434 to 20,466) | 271.2 | (220.6 to 312.2) |
|         |         | Hemorrhagic Stroke | Male   | 1990 | 8,233            | (6,705 to 10,393)  | 511.6 | (417.6 to 651.0) |
|         |         |                    |        | 2013 | 6,927            | (5,176 to 8,640)   | 249.9 | (186.7 to 310.7) |
|         |         |                    | Female | 1990 | 9,577            | (8,078 to 12,178)  | 511.1 | (430.6 to 645.3) |
|         |         |                    |        | 2013 | 8,045            | (6,135 to 10,096)  | 256.3 | (197.8 to 318.7) |
|         |         |                    | Both   | 1990 | 17,810           | (15,858 to 21,229) | 510.1 | (453.2 to 608.5) |
|         |         |                    |        | 2013 | 14,972           | (12,470 to 17,253) | 253.4 | (211.0 to 292.4) |
|         | YLDs    | Ischemic Stroke    | Male   | 1990 | 717              | (482 to 1,002)     | 46.3  | (31.4 to 64.5)   |
|         |         |                    |        | 2013 | 897              | (577 to 1,276)     | 32    | (20.4 to 45.5)   |
|         |         |                    | Female | 1990 | 655              | (443 to 890)       | 32.5  | (22.1 to 44.2)   |
|         |         |                    |        | 2013 | 747              | (481 to 1,051)     | 23.4  | (15.0 to 32.8)   |
|         |         |                    | Both   | 1990 | 1,373            | (946 to 1,847)     | 38.7  | (26.8 to 52.0)   |
|         |         |                    |        | 2013 | 1,644            | (1,117 to 2,261)   | 27.4  | (18.6 to 37.6)   |
|         |         | Hemorrhagic Stroke | Male   | 1990 | 535              | (360 to 756)       | 34    | (22.9 to 47.8)   |
|         |         |                    |        | 2013 | 748              | (477 to 1,083)     | 27.3  | (17.7 to 39.3)   |
|         |         |                    | Female | 1990 | 432              | (290 to 595)       | 22.2  | (14.9 to 30.6)   |
|         |         |                    |        | 2013 | 508              | (334 to 716)       | 16.7  | (10.9 to 23.5)   |
|         |         |                    | Both   | 1990 | 967              | (669 to 1,311)     | 27.4  | (18.9 to 37.3)   |
|         |         |                    | Both   | 2013 | 1,256            | (836 to 1,711)     | 21.7  | (14.4 to 29.4)   |
|         |         |                    |        |      | Counts, All Ages |                    | Rate  | Per 100,000      |
|         |         |                    |        |      |                  |                    | Age-  | standardized     |
| Country | measure | Stroke Type        | sex    | year | Mean             | 95% UI             | Mean  | 95% UI           |

|           |        |                    |        |      |        |                    |       |                   |
|-----------|--------|--------------------|--------|------|--------|--------------------|-------|-------------------|
| Nicaragua | Deaths | Ischemic Stroke    | Male   | 1990 | 295    | (154 to 390)       | 56.7  | (29.3 to 75.7)    |
|           |        |                    |        | 2013 | 248    | (173 to 436)       | 18.4  | (12.8 to 32.2)    |
|           |        |                    | Female | 1990 | 383    | (185 to 470)       | 58.4  | (28.3 to 72.2)    |
|           |        |                    |        | 2013 | 249    | (180 to 431)       | 14.9  | (10.8 to 25.8)    |
|           |        |                    | Both   | 1990 | 678    | (373 to 836)       | 57.9  | (31.3 to 71.6)    |
|           |        |                    |        | 2013 | 498    | (384 to 813)       | 16.5  | (12.7 to 26.9)    |
|           | Deaths | Hemorrhagic Stroke | Male   | 1990 | 246    | (182 to 386)       | 40.2  | (27.8 to 66.4)    |
|           |        |                    |        | 2013 | 762    | (550 to 941)       | 54.5  | (39.0 to 67.8)    |
|           |        |                    | Female | 1990 | 304    | (253 to 463)       | 40.2  | (32.4 to 64.2)    |
|           |        |                    |        | 2013 | 788    | (607 to 988)       | 46.1  | (35.4 to 57.8)    |
|           |        |                    | Both   | 1990 | 551    | (452 to 805)       | 40.2  | (31.7 to 61.7)    |
|           |        |                    |        | 2013 | 1,551  | (1,259 to 1,771)   | 50    | (40.3 to 57.2)    |
|           | DALYs  | Ischemic Stroke    | Male   | 1990 | 6,060  | (3,192 to 7,897)   | 838.1 | (442.8 to 1101.8) |
|           |        |                    |        | 2013 | 3,888  | (2,809 to 6,601)   | 255.5 | (183.9 to 437.0)  |
|           |        |                    | Female | 1990 | 6,794  | (3,235 to 8,329)   | 809.3 | (389.3 to 991.8)  |
|           |        |                    |        | 2013 | 3,195  | (2,357 to 5,432)   | 181.7 | (133.9 to 310.2)  |
|           |        |                    | Both   | 1990 | 12,854 | (7,075 to 15,854)  | 823.9 | (457.3 to 1015.2) |
|           |        |                    |        | 2013 | 7,083  | (5,559 to 11,344)  | 216.3 | (168.6 to 348.9)  |
|           |        | Hemorrhagic Stroke | Male   | 1990 | 6,715  | (5,208 to 9,818)   | 733.1 | (545.8 to 1132.3) |
|           |        |                    |        | 2013 | 13,871 | (10,461 to 16,794) | 848.4 | (636.0 to 1029.3) |
|           |        |                    | Female | 1990 | 7,657  | (6,369 to 10,557)  | 749.2 | (629.3 to 1080.0) |
|           |        |                    |        | 2013 | 12,305 | (9,844 to 15,627)  | 659.3 | (527.3 to 835.1)  |
|           |        |                    | Both   | 1990 | 14,373 | (12,315 to 19,275) | 739.4 | (616.3 to 1041.4) |
|           |        |                    |        | 2013 | 26,177 | (22,075 to 29,969) | 748.2 | (624.1 to 856.5)  |
|           | YLDs   | Ischemic Stroke    | Male   | 1990 | 39     | (25 to 55)         | 5.1   | (3.3 to 7.2)      |
|           |        |                    |        | 2013 | 100    | (62 to 146)        | 6.3   | (4.0 to 9.1)      |
|           |        |                    | Female | 1990 | 43     | (26 to 62)         | 5.1   | (3.1 to 7.4)      |

|                  |         |                    |        | 2013 | 101    | (63 to 148)       | 5.7   | (3.5 to 8.4)      |
|------------------|---------|--------------------|--------|------|--------|-------------------|-------|-------------------|
|                  |         |                    | Both   | 1990 | 82     | (54 to 114)       | 5.1   | (3.4 to 7.1)      |
|                  |         |                    |        | 2013 | 202    | (137 to 281)      | 6     | (4.1 to 8.4)      |
|                  |         | Hemorrhagic Stroke | Male   | 1990 | 122    | (84 to 169)       | 13.2  | (9.2 to 18.9)     |
|                  |         |                    |        | 2013 | 328    | (217 to 464)      | 18.3  | (12.4 to 26.0)    |
|                  |         |                    | Female | 1990 | 110    | (69 to 155)       | 11.2  | (7.0 to 15.9)     |
|                  |         |                    |        | 2013 | 251    | (163 to 364)      | 12.6  | (8.2 to 18.4)     |
|                  |         |                    | Both   | 1990 | 232    | (160 to 311)      | 12.2  | (8.5 to 16.5)     |
|                  |         |                    | Both   | 2013 | 580    | (399 to 811)      | 15.3  | (10.5 to 21.2)    |
| Niger            | Deaths  | Ischemic Stroke    | Male   | 1990 | 431    | (202 to 710)      | 51.2  | (26.8 to 81.3)    |
|                  |         |                    |        | 2013 | 944    | (114 to 1,603)    | 46.9  | (6.5 to 78.1)     |
|                  |         |                    | Female | 1990 | 590    | (266 to 993)      | 61.7  | (30.8 to 98.3)    |
| Counts, All Ages |         |                    |        |      |        |                   |       |                   |
| Rate Per 100,000 |         |                    |        |      |        |                   |       |                   |
| Age-standardized |         |                    |        |      |        |                   |       |                   |
| Country          | measure | Stroke Type        | sex    | year | Mean   | 95% UI            | Mean  | 95% UI            |
|                  |         |                    |        | 2013 | 1,417  | (99 to 2,319)     | 68.6  | (5.2 to 108.7)    |
|                  |         |                    | Both   | 1990 | 1,022  | (639 to 1,376)    | 57.2  | (35.7 to 76.0)    |
|                  |         |                    |        | 2013 | 2,361  | (469 to 3,619)    | 58.6  | (12.4 to 88.6)    |
|                  | Deaths  | Hemorrhagic Stroke | Male   | 1990 | 628    | (400 to 893)      | 47.8  | (24.5 to 72.9)    |
|                  |         |                    |        | 2013 | 901    | (461 to 1,760)    | 32.9  | (14.4 to 74.5)    |
|                  |         |                    | Female | 1990 | 728    | (358 to 1,027)    | 52.3  | (23.4 to 80.1)    |
|                  |         |                    |        | 2013 | 1,167  | (372 to 2,259)    | 42.4  | (13.1 to 89.9)    |
|                  |         |                    | Both   | 1990 | 1,356  | (881 to 1,744)    | 50.3  | (30.0 to 66.6)    |
|                  |         |                    |        | 2013 | 2,068  | (1,176 to 3,874)  | 37.8  | (19.2 to 79.8)    |
|                  | DALYs   | Ischemic Stroke    | Male   | 1990 | 11,535 | (5,509 to 19,730) | 848.5 | (421.1 to 1374.7) |
|                  |         |                    |        | 2013 | 20,446 | (2,815 to 35,128) | 720   | (105.2 to 1209.4) |
|                  |         |                    | Female | 1990 | 14,774 | (6,019 to 27,426) | 968.3 | (443.9 to 1595.8) |

|         |        |                    |        |      |        |                     |        |                   |
|---------|--------|--------------------|--------|------|--------|---------------------|--------|-------------------|
|         |        |                    |        | 2013 | 27,204 | (1,995 to 47,022)   | 986.2  | (78.7 to 1616.9)  |
|         |        |                    | Both   | 1990 | 26,310 | (16,693 to 36,949)  | 915.6  | (583.3 to 1221.6) |
|         |        |                    |        | 2013 | 47,651 | (9,760 to 74,847)   | 860.8  | (182.6 to 1313.4) |
|         |        | Hemorrhagic Stroke | Male   | 1990 | 25,534 | (16,658 to 36,643)  | 1066.7 | (644.8 to 1538.2) |
|         |        |                    |        | 2013 | 27,618 | (16,100 to 46,684)  | 649.8  | (328.6 to 1281.5) |
|         |        |                    | Female | 1990 | 26,938 | (14,931 to 37,687)  | 1107.9 | (535.3 to 1591.7) |
|         |        |                    |        | 2013 | 33,160 | (10,677 to 59,077)  | 829.2  | (265.9 to 1580.9) |
|         |        |                    | Both   | 1990 | 52,472 | (35,680 to 68,606)  | 1090.4 | (690.9 to 1398.4) |
|         |        |                    |        | 2013 | 60,778 | (36,723 to 101,771) | 738.7  | (419.1 to 1380.8) |
|         | YLDs   | Ischemic Stroke    | Male   | 1990 | 231    | (150 to 334)        | 15.4   | (10.1 to 22.8)    |
|         |        |                    |        | 2013 | 566    | (356 to 805)        | 15.2   | (9.7 to 21.4)     |
|         |        |                    | Female | 1990 | 194    | (122 to 279)        | 11.5   | (7.4 to 16.6)     |
|         |        |                    |        | 2013 | 429    | (277 to 609)        | 11.8   | (7.8 to 16.7)     |
|         |        |                    | Both   | 1990 | 425    | (281 to 593)        | 13.3   | (9.0 to 18.6)     |
|         |        |                    |        | 2013 | 996    | (661 to 1,354)      | 13.5   | (8.8 to 18.2)     |
|         |        | Hemorrhagic Stroke | Male   | 1990 | 76     | (46 to 114)         | 4.2    | (2.6 to 6.3)      |
|         |        |                    |        | 2013 | 173    | (104 to 252)        | 3.9    | (2.3 to 5.9)      |
|         |        |                    | Female | 1990 | 57     | (36 to 83)          | 2.9    | (1.9 to 4.2)      |
|         |        |                    |        | 2013 | 117    | (70 to 170)         | 2.8    | (1.7 to 4.0)      |
|         |        |                    | Both   | 1990 | 134    | (86 to 187)         | 3.5    | (2.3 to 4.9)      |
|         |        |                    | Both   | 2013 | 290    | (182 to 411)        | 3.3    | (2.1 to 4.7)      |
| Nigeria | Deaths | Ischemic Stroke    | Male   | 1990 | 6,759  | (4,530 to 9,934)    | 62.5   | (43.4 to 88.7)    |
|         |        |                    |        | 2013 | 15,729 | (9,608 to 21,473)   | 84.7   | (55.5 to 110.2)   |
|         |        |                    | Female | 1990 | 10,135 | (7,700 to 14,202)   | 81     | (61.4 to 108.8)   |
|         |        |                    |        | 2013 | 19,204 | (12,150 to 25,482)  | 99.9   | (63.0 to 128.4)   |
|         |        |                    | Both   | 1990 | 16,895 | (13,643 to 21,455)  | 72.9   | (59.2 to 90.4)    |



| Country | measure | Stroke Type        | sex    | year | Counts, All Ages |                      | Rate Per 100,000 Age-standardized |                   |
|---------|---------|--------------------|--------|------|------------------|----------------------|-----------------------------------|-------------------|
|         |         |                    |        |      | Mean             | 95% UI               | Mean                              | 95% UI            |
|         |         |                    |        | 2013 | 34,933           | (23,101 to 43,286)   | 92.8                              | (64.5 to 112.2)   |
|         | Deaths  | Hemorrhagic Stroke | Male   | 1990 | 6,559            | (3,331 to 8,821)     | 43.3                              | (19.2 to 59.9)    |
|         |         |                    |        | 2013 | 9,537            | (5,936 to 16,626)    | 35.2                              | (20.6 to 66.5)    |
|         |         |                    | Female | 1990 | 8,622            | (5,625 to 11,446)    | 52.9                              | (30.4 to 71.1)    |
|         |         |                    |        | 2013 | 10,944           | (7,132 to 19,738)    | 39.5                              | (24.8 to 75.2)    |
|         |         |                    | Both   | 1990 | 15,181           | (10,485 to 18,527)   | 48.6                              | (30.8 to 60.6)    |
|         |         |                    |        | 2013 | 20,481           | (14,789 to 34,536)   | 37.5                              | (26.0 to 66.3)    |
|         | DALYs   | Ischemic Stroke    | Male   | 1990 | 151,415          | (101,533 to 232,063) | 922.1                             | (625.4 to 1344.5) |
|         |         |                    |        | 2013 | 323,230          | (190,074 to 454,666) | 1205.6                            | (749.5 to 1629.1) |
|         |         |                    | Female | 1990 | 207,793          | (154,803 to 306,585) | 1166.6                            | (886.1 to 1627.8) |
|         |         |                    |        | 2013 | 362,406          | (227,975 to 488,626) | 1339.3                            | (848.3 to 1768.5) |
|         |         |                    | Both   | 1990 | 359,208          | (286,745 to 474,946) | 1056.7                            | (855.3 to 1331.5) |
|         |         |                    |        | 2013 | 685,636          | (447,557 to 854,507) | 1277.6                            | (851.0 to 1570.8) |
|         |         | Hemorrhagic Stroke | Male   | 1990 | 214,271          | (127,825 to 279,870) | 831.7                             | (413.8 to 1112.7) |
|         |         |                    |        | 2013 | 306,570          | (199,534 to 477,853) | 687.3                             | (428.4 to 1214.2) |
|         |         |                    | Female | 1990 | 248,195          | (173,213 to 348,402) | 985.5                             | (639.1 to 1303.3) |
|         |         |                    |        | 2013 | 324,134          | (218,944 to 566,523) | 751.5                             | (491.9 to 1336.8) |

|             |         |                    |        |      |             |                      |       |                   |
|-------------|---------|--------------------|--------|------|-------------|----------------------|-------|-------------------|
|             |         |                    | Both   | 1990 | 462,466     | (331,654 to 580,327) | 914.7 | (625.2 to 1122.1) |
|             |         |                    |        | 2013 | 630,704     | (470,371 to 991,236) | 720.7 | (520.0 to 1213.8) |
|             | YLDs    | Ischemic Stroke    | Male   | 1990 | 3,218       | (2,065 to 4,644)     | 15.3  | (9.8 to 21.8)     |
|             |         |                    |        | 2013 | 5,609       | (3,339 to 8,466)     | 14.6  | (8.8 to 22.4)     |
|             |         |                    | Female | 1990 | 2,570       | (1,656 to 3,643)     | 11.4  | (7.4 to 15.9)     |
|             |         |                    |        | 2013 | 4,626       | (2,979 to 6,755)     | 11.9  | (7.8 to 17.5)     |
|             |         |                    | Both   | 1990 | 5,789       | (3,975 to 7,959)     | 13.2  | (9.2 to 18.0)     |
|             |         |                    |        | 2013 | 10,236      | (6,479 to 14,740)    | 13.2  | (8.5 to 19.3)     |
|             |         | Hemorrhagic Stroke | Male   | 1990 | 1,039       | (625 to 1,554)       | 4.1   | (2.5 to 6.2)      |
|             |         |                    |        | 2013 | 1,819       | (1,121 to 2,680)     | 3.9   | (2.3 to 5.9)      |
|             |         |                    | Female | 1990 | 769         | (467 to 1,133)       | 2.9   | (1.8 to 4.3)      |
|             |         |                    |        | 2013 | 1,263       | (767 to 1,883)       | 2.7   | (1.7 to 4.1)      |
|             |         |                    | Both   | 1990 | 1,809       | (1,203 to 2,533)     | 3.5   | (2.3 to 4.9)      |
|             |         |                    | Both   | 2013 | 3,083       | (1,991 to 4,448)     | 3.3   | (2.1 to 4.8)      |
|             |         |                    |        |      | Counts, All | Ages                 | Rate  | Per 100,000       |
|             |         |                    |        |      |             |                      | Age-  | standardized      |
| Country     | measure | Stroke Type        | sex    | year | Mean        | 95% UI               | Mean  | 95% UI            |
| North Korea | Deaths  | Ischemic Stroke    | Male   | 1990 | 1,544       | (698 to 2,382)       | 59.8  | (27.6 to 90.1)    |
|             |         |                    |        | 2013 | 4,872       | (2,516 to 7,389)     | 76.5  | (41.6 to 109.4)   |
|             |         |                    | Female | 1990 | 2,818       | (1,328 to 4,424)     | 50.2  | (24.6 to 77.7)    |
|             |         |                    |        | 2013 | 7,807       | (4,058 to 10,223)    | 60.5  | (31.2 to 79.8)    |
|             |         |                    | Both   | 1990 | 4,363       | (2,350 to 6,188)     | 53.1  | (29.1 to 77.3)    |
|             |         |                    |        | 2013 | 12,679      | (8,108 to 16,483)    | 66.2  | (42.3 to 84.4)    |
|             | Deaths  | Hemorrhagic Stroke | Male   | 1990 | 6,424       | (4,240 to 9,287)     | 181.3 | (127.9 to 251.3)  |
|             |         |                    |        | 2013 | 14,370      | (10,487 to 19,512)   | 182   | (134.8 to 243.0)  |
|             |         |                    | Female | 1990 | 10,116      | (6,854 to 14,777)    | 160.5 | (111.5 to 231.0)  |

|  |       |                    |        |      |         |                      |        |                    |
|--|-------|--------------------|--------|------|---------|----------------------|--------|--------------------|
|  |       |                    |        | 2013 | 18,025  | (13,738 to 24,128)   | 135.6  | (104.9 to 181.3)   |
|  |       |                    | Both   | 1990 | 16,541  | (12,344 to 21,771)   | 168.2  | (127.5 to 220.5)   |
|  |       |                    |        | 2013 | 32,395  | (26,754 to 41,223)   | 153.7  | (127.1 to 196.2)   |
|  | DALYs | Ischemic Stroke    | Male   | 1990 | 36,571  | (16,064 to 58,528)   | 930.7  | (445.3 to 1416.4)  |
|  |       |                    |        | 2013 | 100,875 | (52,772 to 159,657)  | 1171.5 | (633.5 to 1753.1)  |
|  |       |                    | Female | 1990 | 49,461  | (21,953 to 80,721)   | 734.2  | (344.1 to 1159.5)  |
|  |       |                    |        | 2013 | 115,892 | (60,674 to 153,236)  | 827    | (426.3 to 1083.0)  |
|  |       |                    | Both   | 1990 | 86,032  | (45,646 to 125,537)  | 802    | (445.9 to 1129.1)  |
|  |       |                    |        | 2013 | 216,768 | (139,817 to 293,219) | 962.3  | (621.4 to 1270.2)  |
|  |       | Hemorrhagic Stroke | Male   | 1990 | 191,359 | (124,688 to 283,938) | 3482.9 | (2366.8 to 4931.7) |
|  |       |                    |        | 2013 | 365,442 | (267,214 to 501,237) | 3504.9 | (2588.8 to 4741.2) |
|  |       |                    | Female | 1990 | 221,571 | (142,926 to 334,890) | 2857.4 | (1897.6 to 4203.1) |
|  |       |                    |        | 2013 | 330,636 | (244,908 to 440,265) | 2327.2 | (1737.2 to 3103.6) |
|  |       |                    | Both   | 1990 | 412,930 | (304,756 to 547,128) | 3114.6 | (2337.2 to 4088.4) |
|  |       |                    |        | 2013 | 696,078 | (563,087 to 878,669) | 2835.5 | (2332.0 to 3594.2) |
|  | YLDs  | Ischemic Stroke    | Male   | 1990 | 1,363   | (815 to 2,110)       | 35.7   | (21.5 to 55.8)     |
|  |       |                    |        | 2013 | 3,097   | (1,850 to 4,553)     | 36.2   | (21.8 to 55.1)     |
|  |       |                    | Female | 1990 | 1,613   | (1,012 to 2,380)     | 23.1   | (14.4 to 33.3)     |
|  |       |                    |        | 2013 | 3,317   | (2,087 to 4,896)     | 23.5   | (14.8 to 34.1)     |
|  |       |                    | Both   | 1990 | 2,977   | (1,939 to 4,292)     | 26.9   | (17.3 to 38.6)     |
|  |       |                    |        | 2013 | 6,414   | (4,253 to 9,022)     | 27.7   | (18.5 to 38.9)     |

|                  |         | Hemorrhagic Stroke | Male   | 1990 | 1,656  | (1,028 to 2,464)   | 37.6                         | (22.7 to 56.7)              |
|------------------|---------|--------------------|--------|------|--------|--------------------|------------------------------|-----------------------------|
|                  |         |                    |        | 2013 | 3,663  | (2,138 to 5,555)   | 40.5                         | (23.2 to 61.9)              |
| Counts, All Ages |         |                    |        |      |        |                    |                              |                             |
| Country          | measure | Stroke Type        | sex    | year | Mean   | 95% UI             | Rate<br>Age-<br>standardized | Per 100,000<br>standardized |
|                  |         |                    | Female | 1990 | 1,692  | (1,100 to 2,455)   | 22.2                         | (14.5 to 31.7)              |
|                  |         |                    |        | 2013 | 3,112  | (1,946 to 4,482)   | 22.1                         | (13.9 to 31.9)              |
|                  |         |                    | Both   | 1990 | 3,348  | (2,200 to 4,741)   | 26.9                         | (17.5 to 38.6)              |
|                  |         |                    | Both   | 2013 | 6,776  | (4,456 to 9,660)   | 28.5                         | (18.6 to 40.6)              |
| Norway           | Deaths  | Ischemic Stroke    | Male   | 1990 | 1,366  | (1,081 to 1,696)   | 52.4                         | (41.4 to 65.3)              |
|                  |         |                    |        | 2013 | 980    | (720 to 1,220)     | 27.9                         | (20.6 to 34.7)              |
|                  |         |                    | Female | 1990 | 2,016  | (1,440 to 2,332)   | 45.1                         | (32.1 to 52.2)              |
|                  |         |                    |        | 2013 | 1,396  | (1,059 to 2,039)   | 23.9                         | (18.3 to 34.9)              |
|                  |         |                    | Both   | 1990 | 3,382  | (2,816 to 3,840)   | 48.4                         | (40.4 to 54.9)              |
|                  |         |                    |        | 2013 | 2,377  | (1,953 to 3,060)   | 25.8                         | (21.4 to 33.2)              |
|                  | Deaths  | Hemorrhagic Stroke | Male   | 1990 | 858    | (669 to 1,198)     | 33.2                         | (25.8 to 46.2)              |
|                  |         |                    |        | 2013 | 752    | (465 to 979)       | 21.6                         | (13.5 to 28.1)              |
|                  |         |                    | Female | 1990 | 1,211  | (909 to 1,528)     | 30.1                         | (23.1 to 37.1)              |
|                  |         |                    |        | 2013 | 889    | (678 to 1,314)     | 16.8                         | (13.2 to 24.4)              |
|                  |         |                    | Both   | 1990 | 2,070  | (1,746 to 2,547)   | 31.6                         | (26.9 to 39.0)              |
|                  |         |                    |        | 2013 | 1,642  | (1,254 to 2,107)   | 19                           | (14.8 to 24.0)              |
|                  | DALYs   | Ischemic Stroke    | Male   | 1990 | 19,039 | (15,813 to 23,865) | 716.7                        | (593.6 to 899.8)            |
|                  |         |                    |        | 2013 | 12,758 | (9,927 to 15,452)  | 372                          | (289.0 to 451.2)            |
|                  |         |                    | Female | 1990 | 21,114 | (16,016 to 24,045) | 516.6                        | (399.4 to 592.9)            |
|                  |         |                    |        | 2013 | 12,459 | (9,947 to 17,108)  | 255.7                        | (206.0 to 352.4)            |
|                  |         |                    | Both   | 1990 | 40,153 | (34,372 to 45,563) | 605                          | (520.7 to 686.5)            |
|                  |         |                    |        | 2013 | 25,218 | (21,243 to 30,694) | 309.4                        | (258.7 to 376.2)            |

|         |         | Hemorrhagic Stroke | Male   | 1990 | 14,392           | (11,526 to 19,183) | 566.8            | (455.0 to 752.7) |
|---------|---------|--------------------|--------|------|------------------|--------------------|------------------|------------------|
|         |         |                    |        | 2013 | 10,672           | (6,841 to 13,224)  | 315.3            | (202.6 to 389.5) |
|         |         |                    | Female | 1990 | 15,453           | (12,070 to 19,055) | 461.1            | (362.7 to 567.8) |
|         |         |                    |        | 2013 | 9,081            | (7,478 to 13,033)  | 214.7            | (178.4 to 305.3) |
|         |         |                    | Both   | 1990 | 29,846           | (25,864 to 36,656) | 509.7            | (441.8 to 621.8) |
|         |         |                    |        | 2013 | 19,753           | (15,791 to 24,057) | 261.7            | (209.4 to 315.0) |
|         | YLDs    | Ischemic Stroke    | Male   | 1990 | 2,147            | (1,428 to 3,019)   | 82.5             | (55.1 to 116.1)  |
|         |         |                    |        | 2013 | 2,778            | (1,807 to 3,883)   | 82               | (53.6 to 115.0)  |
|         |         |                    | Female | 1990 | 2,295            | (1,497 to 3,271)   | 64.6             | (42.6 to 91.7)   |
|         |         |                    |        | 2013 | 2,372            | (1,544 to 3,357)   | 59.3             | (38.4 to 83.2)   |
|         |         |                    | Both   | 1990 | 4,443            | (3,050 to 6,030)   | 72.5             | (49.5 to 97.9)   |
|         |         |                    |        | 2013 | 5,151            | (3,421 to 7,199)   | 70               | (46.8 to 96.7)   |
|         |         | Hemorrhagic Stroke | Male   | 1990 | 373              | (229 to 562)       | 14.7             | (9.0 to 21.8)    |
|         |         |                    |        | 2013 | 389              | (236 to 576)       | 11.9             | (7.2 to 17.5)    |
|         |         |                    | Female | 1990 | 304              | (185 to 452)       | 9.5              | (5.9 to 14.0)    |
|         |         |                    |        | 2013 | 325              | (193 to 497)       | 8.9              | (5.3 to 13.5)    |
|         |         |                    | Both   | 1990 | 678              | (441 to 951)       | 11.7             | (7.6 to 16.3)    |
|         |         |                    |        |      | Counts, All Ages |                    | Rate Per 100,000 |                  |
|         |         |                    |        |      |                  |                    | Age-standardized |                  |
| Country | measure | Stroke Type        | sex    | year | Mean             | 95% UI             | Mean             | 95% UI           |
|         |         |                    | Both   | 2013 | 715              | (463 to 1,027)     | 10.2             | (6.7 to 14.7)    |
| Oman    | Deaths  | Ischemic Stroke    | Male   | 1990 | 50               | (30 to 85)         | 29.5             | (18.5 to 48.8)   |
|         |         |                    |        | 2013 | 216              | (138 to 283)       | 42.7             | (27.0 to 55.8)   |
|         |         |                    | Female | 1990 | 58               | (36 to 108)        | 27.9             | (17.3 to 50.5)   |
|         |         |                    |        | 2013 | 166              | (94 to 220)        | 37.2             | (21.4 to 49.3)   |
|         |         |                    | Both   | 1990 | 108              | (73 to 177)        | 28.5             | (19.8 to 45.3)   |
|         |         |                    |        | 2013 | 382              | (263 to 485)       | 40.2             | (27.6 to 50.8)   |

|  |        |                    |        |      |        |                   |        |                    |
|--|--------|--------------------|--------|------|--------|-------------------|--------|--------------------|
|  | Deaths | Hemorrhagic Stroke | Male   | 1990 | 170    | (114 to 243)      | 73.5   | (49.1 to 101.6)    |
|  |        |                    |        | 2013 | 312    | (217 to 421)      | 53.4   | (37.4 to 72.7)     |
|  |        |                    | Female | 1990 | 224    | (161 to 314)      | 77     | (56.3 to 105.1)    |
|  |        |                    |        | 2013 | 247    | (175 to 332)      | 48.8   | (34.6 to 65.5)     |
|  |        |                    | Both   | 1990 | 395    | (304 to 500)      | 74.7   | (57.9 to 93.0)     |
|  |        |                    |        | 2013 | 560    | (437 to 701)      | 51.2   | (40.2 to 64.4)     |
|  | DALYs  | Ischemic Stroke    | Male   | 1990 | 1,059  | (628 to 1,873)    | 411.2  | (251.0 to 688.0)   |
|  |        |                    |        | 2013 | 3,639  | (2,328 to 4,905)  | 566.8  | (361.8 to 748.5)   |
|  |        |                    | Female | 1990 | 1,054  | (625 to 2,012)    | 386.6  | (236.2 to 716.3)   |
|  |        |                    |        | 2013 | 2,240  | (1,317 to 2,994)  | 446.1  | (261.9 to 591.6)   |
|  |        |                    | Both   | 1990 | 2,113  | (1,405 to 3,589)  | 397.6  | (271.9 to 651.4)   |
|  |        |                    |        | 2013 | 5,880  | (4,057 to 7,535)  | 511.7  | (350.9 to 652.1)   |
|  |        | Hemorrhagic Stroke | Male   | 1990 | 5,510  | (3,597 to 7,961)  | 1273.4 | (846.0 to 1809.8)  |
|  |        |                    |        | 2013 | 7,070  | (4,869 to 9,772)  | 871.5  | (594.7 to 1172.4)  |
|  |        |                    | Female | 1990 | 7,713  | (4,906 to 11,249) | 1530.1 | (1086.9 to 2169.4) |
|  |        |                    |        | 2013 | 5,258  | (3,668 to 7,262)  | 798.8  | (549.0 to 1098.2)  |
|  |        |                    | Both   | 1990 | 13,223 | (9,758 to 17,777) | 1381.5 | (1054.3 to 1752.2) |
|  |        |                    |        | 2013 | 12,328 | (9,541 to 15,642) | 834.9  | (645.9 to 1045.2)  |
|  | YLDs   | Ischemic Stroke    | Male   | 1990 | 36     | (23 to 54)        | 9.2    | (5.9 to 13.2)      |
|  |        |                    |        | 2013 | 94     | (62 to 138)       | 9.2    | (6.1 to 13.5)      |
|  |        |                    | Female | 1990 | 23     | (14 to 33)        | 7.1    | (4.5 to 10.2)      |
|  |        |                    |        | 2013 | 48     | (32 to 67)        | 7.3    | (5.0 to 10.2)      |
|  |        |                    | Both   | 1990 | 60     | (39 to 83)        | 8.1    | (5.5 to 11.1)      |
|  |        |                    |        | 2013 | 143    | (97 to 200)       | 8.4    | (5.8 to 11.7)      |
|  |        | Hemorrhagic Stroke | Male   | 1990 | 7      | (3 to 11)         | 1.4    | (0.7 to 2.2)       |
|  |        |                    |        | 2013 | 18     | (10 to 30)        | 1.3    | (0.7 to 2.2)       |

|          |         |                    |        |      |             |                      |        |                   |
|----------|---------|--------------------|--------|------|-------------|----------------------|--------|-------------------|
|          |         |                    | Female | 1990 | 6           | (3 to 9)             | 1.6    | (0.9 to 2.4)      |
|          |         |                    |        | 2013 | 10          | (6 to 17)            | 1.4    | (0.8 to 2.1)      |
|          |         |                    | Both   | 1990 | 13          | (8 to 19)            | 1.4    | (0.9 to 2.1)      |
|          |         |                    | Both   | 2013 | 29          | (17 to 44)           | 1.3    | (0.8 to 2.0)      |
| Pakistan | Deaths  | Ischemic Stroke    | Male   | 1990 | 11,151      | (5,581 to 16,584)    | 54.3   | (28.1 to 80.0)    |
|          |         |                    |        | 2013 | 28,709      | (16,587 to 39,150)   | 77.5   | (46.0 to 105.3)   |
|          |         |                    |        |      | Counts, All | Ages                 | Rate   | Per 100,000       |
|          |         |                    |        |      |             |                      | Age-   | standardized      |
| Country  | measure | Stroke Type        | sex    | year | Mean        | 95% UI               | Mean   | 95% UI            |
|          |         |                    | Female | 1990 | 13,603      | (7,721 to 18,854)    | 81.3   | (45.1 to 110.2)   |
|          |         |                    |        | 2013 | 30,526      | (17,267 to 44,951)   | 89.4   | (51.3 to 129.6)   |
|          |         |                    | Both   | 1990 | 24,754      | (16,667 to 32,015)   | 66.4   | (44.1 to 85.2)    |
|          |         |                    |        | 2013 | 59,235      | (41,444 to 77,651)   | 83.2   | (58.4 to 108.0)   |
|          | Deaths  | Hemorrhagic Stroke | Male   | 1990 | 11,457      | (6,194 to 17,303)    | 46     | (23.0 to 71.5)    |
|          |         |                    |        | 2013 | 28,546      | (18,292 to 41,241)   | 64.3   | (39.7 to 94.0)    |
|          |         |                    | Female | 1990 | 15,090      | (8,705 to 20,702)    | 73.1   | (40.4 to 103.7)   |
|          |         |                    |        | 2013 | 30,762      | (17,030 to 46,336)   | 74.9   | (39.7 to 115.0)   |
|          |         |                    | Both   | 1990 | 26,548      | (17,496 to 35,559)   | 58.3   | (37.1 to 79.5)    |
|          |         |                    |        | 2013 | 59,309      | (39,064 to 79,834)   | 69.5   | (45.6 to 92.9)    |
|          | DALYs   | Ischemic Stroke    | Male   | 1990 | 198,261     | (98,756 to 310,379)  | 784    | (397.3 to 1182.7) |
|          |         |                    |        | 2013 | 491,635     | (285,867 to 695,166) | 1111.9 | (647.4 to 1538.8) |
|          |         |                    | Female | 1990 | 230,938     | (130,979 to 326,433) | 1129.6 | (653.7 to 1565.0) |
|          |         |                    |        | 2013 | 485,310     | (273,127 to 738,714) | 1192   | (676.4 to 1778.1) |
|          |         |                    | Both   | 1990 | 429,199     | (286,948 to 556,141) | 939.6  | (634.3 to 1215.2) |

|         |         |                    |        |      |             |                        |        |                   |
|---------|---------|--------------------|--------|------|-------------|------------------------|--------|-------------------|
|         |         |                    |        | 2013 | 976,946     | (668,936 to 1,311,036) | 1150.4 | (797.4 to 1521.4) |
|         |         | Hemorrhagic Stroke | Male   | 1990 | 293,479     | (179,615 to 419,222)   | 913.2  | (519.4 to 1348.6) |
|         |         |                    |        | 2013 | 712,097     | (461,016 to 1,025,732) | 1277.8 | (832.6 to 1831.7) |
|         |         |                    | Female | 1990 | 366,233     | (222,814 to 490,920)   | 1417.3 | (824.5 to 1940.1) |
|         |         |                    |        | 2013 | 710,786     | (421,802 to 1,084,402) | 1400.8 | (798.9 to 2135.2) |
|         |         |                    | Both   | 1990 | 659,712     | (459,253 to 851,372)   | 1142.6 | (769.4 to 1504.7) |
|         |         |                    |        | 2013 | 1,422,883   | (967,336 to 1,894,784) | 1337.7 | (889.8 to 1789.6) |
|         | YLDs    | Ischemic Stroke    | Male   | 1990 | 8,413       | (5,341 to 11,847)      | 27.9   | (18.2 to 38.9)    |
|         |         |                    |        | 2013 | 19,148      | (12,559 to 26,984)     | 37     | (24.5 to 52.0)    |
|         |         |                    | Female | 1990 | 5,777       | (3,724 to 8,198)       | 22.4   | (14.5 to 31.7)    |
|         |         |                    |        | 2013 | 10,900      | (6,887 to 15,695)      | 20.8   | (13.2 to 30.4)    |
|         |         |                    | Both   | 1990 | 14,191      | (9,325 to 19,445)      | 25.4   | (16.8 to 34.5)    |
|         |         |                    |        | 2013 | 30,049      | (20,472 to 42,089)     | 29.1   | (19.9 to 41.1)    |
|         |         | Hemorrhagic Stroke | Male   | 1990 | 4,690       | (2,947 to 6,674)       | 14.5   | (9.3 to 20.3)     |
|         |         |                    |        | 2013 | 9,976       | (6,471 to 14,246)      | 17.9   | (11.8 to 25.5)    |
|         |         |                    | Female | 1990 | 2,782       | (1,707 to 4,086)       | 9.8    | (6.0 to 14.2)     |
|         |         |                    |        |      | Counts, All | Ages                   | Rate   | Per 100,000       |
|         |         |                    |        |      |             |                        | Age-   | standardized      |
| Country | measure | Stroke Type        | sex    | year | Mean        | 95% UI                 | Mean   | 95% UI            |
|         |         |                    |        | 2013 | 5,227       | (3,202 to 7,669)       | 9.1    | (5.5 to 13.5)     |
|         |         |                    | Both   | 1990 | 7,472       | (4,924 to 10,434)      | 12.3   | (8.1 to 17.1)     |
|         |         |                    | Both   | 2013 | 15,203      | (10,216 to 20,804)     | 13.6   | (9.1 to 18.7)     |



|           |                    |                    |                    |                    |                    |                    |                    |                  |
|-----------|--------------------|--------------------|--------------------|--------------------|--------------------|--------------------|--------------------|------------------|
| Palestine | Deaths             | Ischemic Stroke    | Male               | 1990               | 56                 | (33 to 86)         | 28.6               | (17.3 to 42.9)   |
|           |                    |                    |                    | 2013               | 176                | (105 to 257)       | 32.9               | (19.4 to 47.9)   |
|           |                    |                    | Female             | 1990               | 71                 | (38 to 105)        | 31.2               | (16.7 to 45.3)   |
|           |                    | 2013               | 176                | (101 to 251)       | 31.7               | (18.1 to 44.4)     |                    |                  |
|           |                    | Both               | 1990               | 128                | (85 to 178)        | 30.1               | (19.7 to 41.4)     |                  |
|           |                    | 2013               | 352                | (232 to 453)       | 32.6               | (21.4 to 42.0)     |                    |                  |
|           | Deaths             | Hemorrhagic Stroke | Male               | 1990               | 293                | (207 to 393)       | 116.9              | (83.3 to 156.2)  |
|           |                    |                    |                    | 2013               | 625                | (442 to 868)       | 102.4              | (73.6 to 139.3)  |
|           |                    |                    | Female             | 1990               | 397                | (291 to 538)       | 142.7              | (104.5 to 190.5) |
|           |                    | 2013               | 593                | (456 to 805)       | 94.4               | (74.4 to 126.3)    |                    |                  |
|           |                    | Both               | 1990               | 691                | (551 to 863)       | 131.2              | (103.6 to 162.0)   |                  |
|           |                    | 2013               | 1,219              | (983 to 1,520)     | 98.9               | (81.1 to 121.0)    |                    |                  |
| DALYs     | Ischemic Stroke    | Male               | 1990               | 1,258              | (761 to 1,961)     | 444                | (269.9 to 668.7)   |                  |
|           |                    |                    | 2013               | 3,573              | (2,235 to 5,211)   | 491.3              | (296.5 to 713.7)   |                  |
|           |                    | Female             | 1990               | 1,454              | (800 to 2,243)     | 453.9              | (245.5 to 674.3)   |                  |
|           | 2013               | 2,777              | (1,690 to 4,122)   | 384.1              | (228.2 to 555.6)   |                    |                    |                  |
|           | Both               | 1990               | 2,712              | (1,929 to 3,842)   | 448.7              | (304.8 to 625.3)   |                    |                  |
|           | 2013               | 6,351              | (4,384 to 8,202)   | 438.1              | (296.2 to 560.6)   |                    |                    |                  |
|           | Hemorrhagic Stroke | Male               | 1990               | 9,717              | (7,014 to 12,969)  | 2038.6             | (1408.1 to 2771.6) |                  |
|           |                    |                    | 2013               | 15,796             | (11,105 to 21,718) | 1702.4             | (1194.7 to 2370.2) |                  |
|           |                    | Female             | 1990               | 12,031             | (8,408 to 17,084)  | 2384.7             | (1701.7 to 3306.4) |                  |
|           | 2013               | 12,562             | (9,438 to 16,783)  | 1344.9             | (1013.2 to 1836.4) |                    |                    |                  |
|           | Both               | 1990               | 21,748             | (17,034 to 27,922) | 2223.4             | (1759.9 to 2799.9) |                    |                  |
|           | 2013               | 28,358             | (22,651 to 35,389) | 1521.7             | (1216.4 to 1913.3) |                    |                    |                  |
| YLDs      | Ischemic Stroke    | Male               | 1990               | 43                 | (28 to 61)         | 11.6               | (7.7 to 16.2)      |                  |
|           |                    |                    | 2013               | 114                | (74 to 163)        | 12                 | (7.7 to 16.9)      |                  |
|           |                    | Female             | 1990               | 34                 | (23 to 50)         | 8.8                | (5.9 to 12.4)      |                  |

|         |         |                    |        | 2013 | 91          | (58 to 128)      | 9.4   | (6.1 to 13.2)     |
|---------|---------|--------------------|--------|------|-------------|------------------|-------|-------------------|
|         |         |                    | Both   | 1990 | 77          | (52 to 108)      | 10.1  | (7.0 to 13.7)     |
|         |         |                    |        | 2013 | 205         | (137 to 281)     | 10.6  | (7.1 to 14.5)     |
|         |         | Hemorrhagic Stroke | Male   | 1990 | 8           | (4 to 13)        | 1.8   | (1.0 to 2.7)      |
|         |         |                    |        | 2013 | 19          | (11 to 30)       | 1.7   | (1.0 to 2.6)      |
|         |         |                    | Female | 1990 | 8           | (5 to 13)        | 1.8   | (1.1 to 2.9)      |
|         |         |                    |        | 2013 | 19          | (11 to 30)       | 1.7   | (1.0 to 2.7)      |
|         |         |                    | Both   | 1990 | 16          | (10 to 24)       | 1.8   | (1.1 to 2.6)      |
|         |         |                    | Both   | 2013 | 38          | (23 to 57)       | 1.7   | (1.0 to 2.5)      |
|         |         |                    |        |      | Counts, All | Ages             | Rate  | Per 100,000       |
|         |         |                    |        |      |             |                  | Age-  | standardized      |
| Country | measure | Stroke Type        | sex    | year | Mean        | 95% UI           | Mean  | 95% UI            |
| Panama  | Deaths  | Ischemic Stroke    | Male   | 1990 | 342         | (223 to 435)     | 65.1  | (42.0 to 82.8)    |
|         |         |                    |        | 2013 | 356         | (211 to 645)     | 26.5  | (15.7 to 47.9)    |
|         |         |                    | Female | 1990 | 340         | (199 to 408)     | 57.2  | (33.5 to 68.7)    |
|         |         |                    |        | 2013 | 321         | (206 to 620)     | 20.6  | (13.2 to 39.8)    |
|         |         |                    | Both   | 1990 | 683         | (457 to 820)     | 61    | (41.1 to 73.3)    |
|         |         |                    |        | 2013 | 678         | (443 to 1,188)   | 23.4  | (15.3 to 41.0)    |
|         | Deaths  | Hemorrhagic Stroke | Male   | 1990 | 218         | (151 to 362)     | 38.3  | (25.8 to 66.4)    |
|         |         |                    |        | 2013 | 769         | (454 to 1,018)   | 55.9  | (32.9 to 74.1)    |
|         |         |                    | Female | 1990 | 223         | (168 to 376)     | 35.5  | (26.1 to 61.5)    |
|         |         |                    |        | 2013 | 718         | (421 to 901)     | 45.9  | (26.9 to 57.6)    |
|         |         |                    | Both   | 1990 | 441         | (332 to 699)     | 36.9  | (27.2 to 60.2)    |
|         |         |                    |        | 2013 | 1,488       | (954 to 1,845)   | 50.8  | (32.3 to 63.0)    |
|         | DALYs   | Ischemic Stroke    | Male   | 1990 | 5,442       | (3,445 to 6,887) | 882.9 | (566.5 to 1115.2) |
|         |         |                    |        | 2013 | 5,031       | (3,153 to 8,848) | 352.1 | (219.5 to 620.8)  |
|         |         |                    | Female | 1990 | 4,641       | (2,739 to 5,550) | 705.7 | (419.0 to 841.4)  |

|                  |         |                    |        |                  |        |                    |              |                   |
|------------------|---------|--------------------|--------|------------------|--------|--------------------|--------------|-------------------|
|                  |         |                    |        | 2013             | 3,561  | (2,332 to 6,912)   | 227.3        | (148.8 to 440.1)  |
|                  |         |                    | Both   | 1990             | 10,083 | (6,642 to 12,107)  | 791.6        | (528.2 to 948.8)  |
|                  |         |                    |        | 2013             | 8,592  | (5,810 to 14,844)  | 287.3        | (194.0 to 495.5)  |
|                  |         | Hemorrhagic Stroke | Male   | 1990             | 4,590  | (3,457 to 6,989)   | 656.6        | (480.9 to 1032.2) |
|                  |         |                    |        | 2013             | 12,792 | (8,041 to 16,984)  | 853.4        | (532.1 to 1130.0) |
|                  |         |                    | Female | 1990             | 4,232  | (3,483 to 6,397)   | 577.4        | (465.4 to 898.2)  |
|                  |         |                    |        | 2013             | 9,466  | (6,188 to 11,708)  | 588.6        | (382.3 to 729.1)  |
|                  |         |                    | Both   | 1990             | 8,822  | (7,134 to 12,714)  | 616          | (486.8 to 921.1)  |
|                  |         |                    |        | 2013             | 22,259 | (15,605 to 27,511) | 717.2        | (498.0 to 885.7)  |
|                  | YLDs    | Ischemic Stroke    | Male   | 1990             | 45     | (28 to 65)         | 7            | (4.4 to 10.2)     |
|                  |         |                    |        | 2013             | 105    | (63 to 159)        | 7.2          | (4.3 to 11.0)     |
|                  |         |                    | Female | 1990             | 40     | (24 to 58)         | 6            | (3.7 to 8.8)      |
|                  |         |                    |        | 2013             | 90     | (57 to 132)        | 5.7          | (3.6 to 8.4)      |
|                  |         |                    | Both   | 1990             | 86     | (56 to 119)        | 6.5          | (4.3 to 9.1)      |
|                  |         |                    |        | 2013             | 195    | (122 to 278)       | 6.4          | (4.1 to 9.1)      |
|                  |         | Hemorrhagic Stroke | Male   | 1990             | 133    | (85 to 186)        | 18.2         | (11.8 to 25.7)    |
|                  |         |                    |        | 2013             | 315    | (207 to 445)       | 20.3         | (13.2 to 29.1)    |
|                  |         |                    | Female | 1990             | 91     | (62 to 128)        | 12.3         | (8.2 to 17.3)     |
|                  |         |                    |        | 2013             | 204    | (135 to 290)       | 12.4         | (8.1 to 17.7)     |
|                  |         |                    | Both   | 1990             | 225    | (153 to 313)       | 15.2         | (10.4 to 21.0)    |
|                  |         |                    | Both   | 2013             | 519    | (347 to 715)       | 16.2         | (10.8 to 22.3)    |
| Papua New Guinea | Deaths  | Ischemic Stroke    | Male   | 1990             | 124    | (69 to 189)        | 26.8         | (15.3 to 38.5)    |
|                  |         |                    |        | 2013             | 276    | (152 to 429)       | 28.6         | (16.8 to 41.2)    |
|                  |         |                    |        | Counts, All Ages |        | Rate               | Per 100,000  |                   |
|                  |         |                    |        |                  |        | Age-               | standardized |                   |
| Country          | measure | Stroke Type        | sex    | year             | Mean   | 95% UI             | Mean         | 95% UI            |

|  |        |                    |        |      |        |                    |        |                   |
|--|--------|--------------------|--------|------|--------|--------------------|--------|-------------------|
|  |        |                    | Female | 1990 | 95     | (58 to 160)        | 16.4   | (10.5 to 27.2)    |
|  |        |                    |        | 2013 | 211    | (137 to 343)       | 16.9   | (11.1 to 27.1)    |
|  |        |                    | Both   | 1990 | 220    | (137 to 320)       | 20.6   | (13.7 to 28.9)    |
|  |        |                    |        | 2013 | 487    | (308 to 718)       | 21.6   | (14.4 to 30.7)    |
|  | Deaths | Hemorrhagic Stroke | Male   | 1990 | 398    | (240 to 594)       | 55.2   | (34.8 to 79.8)    |
|  |        |                    |        | 2013 | 820    | (489 to 1,265)     | 57.4   | (35.5 to 83.3)    |
|  |        |                    | Female | 1990 | 177    | (109 to 297)       | 23.9   | (15.0 to 38.4)    |
|  |        |                    |        | 2013 | 365    | (221 to 579)       | 23.7   | (14.9 to 37.0)    |
|  |        |                    | Both   | 1990 | 576    | (371 to 849)       | 37.6   | (25.3 to 53.3)    |
|  |        |                    |        | 2013 | 1,185  | (743 to 1,747)     | 38.4   | (24.9 to 54.1)    |
|  | DALYs  | Ischemic Stroke    | Male   | 1990 | 3,442  | (1,867 to 5,243)   | 487.2  | (289.2 to 715.3)  |
|  |        |                    |        | 2013 | 7,091  | (3,874 to 11,477)  | 503.4  | (291.8 to 748.5)  |
|  |        |                    | Female | 1990 | 2,399  | (1,470 to 4,059)   | 304.6  | (191.1 to 494.4)  |
|  |        |                    |        | 2013 | 4,864  | (3,109 to 7,902)   | 299.2  | (199.5 to 475.9)  |
|  |        |                    | Both   | 1990 | 5,842  | (3,612 to 8,639)   | 384.5  | (251.6 to 543.8)  |
|  |        |                    |        | 2013 | 11,955 | (7,530 to 18,050)  | 388.1  | (252.3 to 560.3)  |
|  |        | Hemorrhagic Stroke | Male   | 1990 | 14,502 | (9,059 to 21,931)  | 1330.3 | (813.3 to 1953.2) |
|  |        |                    |        | 2013 | 27,727 | (17,019 to 43,050) | 1341.4 | (820.0 to 2038.2) |
|  |        |                    | Female | 1990 | 5,722  | (3,592 to 9,547)   | 552.5  | (344.3 to 912.4)  |
|  |        |                    |        | 2013 | 10,632 | (6,392 to 17,081)  | 524.1  | (321.8 to 824.8)  |
|  |        |                    | Both   | 1990 | 20,225 | (13,305 to 29,948) | 923.6  | (605.1 to 1346.2) |
|  |        |                    |        | 2013 | 38,360 | (24,453 to 57,608) | 907.2  | (578.7 to 1320.6) |
|  | YLDs   | Ischemic Stroke    | Male   | 1990 | 161    | (101 to 229)       | 26.4   | (17.5 to 37.9)    |
|  |        |                    |        | 2013 | 344    | (224 to 496)       | 26.7   | (17.5 to 37.9)    |
|  |        |                    | Female | 1990 | 138    | (90 to 200)        | 19.8   | (13.0 to 28.6)    |
|  |        |                    |        | 2013 | 274    | (176 to 390)       | 17.9   | (11.9 to 25.5)    |
|  |        |                    | Both   | 1990 | 299    | (200 to 417)       | 22.7   | (15.4 to 31.7)    |

|          |         |                    |        |      |             |                    |        |                   |
|----------|---------|--------------------|--------|------|-------------|--------------------|--------|-------------------|
|          |         |                    |        | 2013 | 618         | (412 to 851)       | 21.7   | (14.7 to 29.5)    |
|          |         | Hemorrhagic Stroke | Male   | 1990 | 234         | (149 to 338)       | 31.4   | (20.2 to 44.5)    |
|          |         |                    |        | 2013 | 483         | (320 to 666)       | 31.4   | (21.0 to 43.9)    |
|          |         |                    | Female | 1990 | 173         | (110 to 240)       | 21.4   | (14.0 to 30.5)    |
|          |         |                    |        | 2013 | 344         | (224 to 484)       | 19.8   | (13.1 to 28.1)    |
|          |         |                    | Both   | 1990 | 408         | (270 to 578)       | 25.8   | (17.3 to 36.0)    |
|          |         |                    | Both   | 2013 | 828         | (563 to 1,125)     | 25     | (17.2 to 34.0)    |
| Paraguay | Deaths  | Ischemic Stroke    | Male   | 1990 | 587         | (434 to 694)       | 84.5   | (62.9 to 100.9)   |
|          |         |                    |        | 2013 | 1,055       | (791 to 1,594)     | 62.9   | (47.4 to 92.3)    |
|          |         |                    | Female | 1990 | 672         | (447 to 771)       | 79.1   | (53.1 to 90.8)    |
|          |         |                    |        | 2013 | 1,130       | (802 to 1,721)     | 58.3   | (41.4 to 87.8)    |
|          |         |                    | Both   | 1990 | 1,259       | (938 to 1,432)     | 81.7   | (61.4 to 92.6)    |
|          |         |                    |        |      | Counts, All | Ages               | Rate   | Per 100,000       |
|          |         |                    |        |      |             |                    | Age-   | standardized      |
| Country  | measure | Stroke Type        | sex    | year | Mean        | 95% UI             | Mean   | 95% UI            |
|          |         |                    |        | 2013 | 2,186       | (1,703 to 3,043)   | 60.6   | (47.5 to 83.6)    |
|          | Deaths  | Hemorrhagic Stroke | Male   | 1990 | 340         | (265 to 526)       | 39.3   | (30.1 to 63.0)    |
|          |         |                    |        | 2013 | 1,035       | (582 to 1,372)     | 53     | (29.2 to 70.7)    |
|          |         |                    | Female | 1990 | 416         | (353 to 609)       | 42.6   | (35.7 to 63.6)    |
|          |         |                    |        | 2013 | 1,067       | (674 to 1,354)     | 50.8   | (31.6 to 64.8)    |
|          |         |                    | Both   | 1990 | 756         | (645 to 1,077)     | 41.1   | (34.4 to 59.9)    |
|          |         |                    |        | 2013 | 2,102       | (1,386 to 2,562)   | 52     | (33.6 to 63.7)    |
|          | DALYs   | Ischemic Stroke    | Male   | 1990 | 10,576      | (7,491 to 12,613)  | 1216.2 | (893.8 to 1436.8) |
|          |         |                    |        | 2013 | 17,218      | (12,583 to 27,699) | 895.1  | (662.3 to 1391.0) |
|          |         |                    | Female | 1990 | 10,501      | (6,732 to 12,169)  | 1071.5 | (701.6 to 1233.4) |
|          |         |                    |        | 2013 | 15,166      | (10,644 to 24,464) | 738.7  | (521.3 to 1176.8) |
|          |         |                    | Both   | 1990 | 21,077      | (15,059 to 24,185) | 1139.6 | (833.1 to 1299.7) |

|      |        |                    |        |      |        |                    |        |                   |
|------|--------|--------------------|--------|------|--------|--------------------|--------|-------------------|
|      |        |                    |        | 2013 | 32,385 | (24,893 to 47,722) | 816.4  | (632.3 to 1173.1) |
|      |        | Hemorrhagic Stroke | Male   | 1990 | 8,938  | (7,185 to 12,924)  | 793.8  | (629.2 to 1204.1) |
|      |        |                    |        | 2013 | 24,263 | (14,386 to 31,913) | 1067.1 | (619.6 to 1411.9) |
|      |        |                    | Female | 1990 | 9,922  | (8,577 to 13,834)  | 854.3  | (732.2 to 1208.7) |
|      |        |                    |        | 2013 | 22,277 | (15,105 to 28,108) | 964.4  | (648.0 to 1222.3) |
|      |        |                    | Both   | 1990 | 18,860 | (16,396 to 25,374) | 824.7  | (709.7 to 1139.4) |
|      |        |                    |        | 2013 | 46,540 | (32,309 to 56,257) | 1016.3 | (690.6 to 1233.6) |
|      | YLDs   | Ischemic Stroke    | Male   | 1990 | 366    | (241 to 521)       | 37.2   | (24.9 to 53.0)    |
|      |        |                    |        | 2013 | 773    | (507 to 1,074)     | 36     | (23.3 to 50.2)    |
|      |        |                    | Female | 1990 | 252    | (170 to 372)       | 23.5   | (15.6 to 34.9)    |
|      |        |                    |        | 2013 | 503    | (325 to 703)       | 22.4   | (14.5 to 31.4)    |
|      |        |                    | Both   | 1990 | 619    | (426 to 860)       | 30     | (20.7 to 41.7)    |
|      |        |                    |        | 2013 | 1,276  | (860 to 1,747)     | 29     | (19.7 to 39.6)    |
|      |        | Hemorrhagic Stroke | Male   | 1990 | 72     | (46 to 103)        | 6.2    | (4.0 to 8.9)      |
|      |        |                    |        | 2013 | 153    | (94 to 226)        | 6.4    | (3.9 to 9.5)      |
|      |        |                    | Female | 1990 | 55     | (34 to 78)         | 4.4    | (2.8 to 6.4)      |
|      |        |                    |        | 2013 | 113    | (70 to 161)        | 4.6    | (2.8 to 6.5)      |
|      |        |                    | Both   | 1990 | 127    | (84 to 177)        | 5.3    | (3.5 to 7.3)      |
|      |        |                    | Both   | 2013 | 267    | (174 to 378)       | 5.4    | (3.6 to 7.7)      |
| Peru | Deaths | Ischemic Stroke    | Male   | 1990 | 1,597  | (1,225 to 1,902)   | 42.9   | (32.2 to 51.3)    |
|      |        |                    |        | 2013 | 2,490  | (1,872 to 3,307)   | 29.6   | (22.5 to 39.1)    |
|      |        |                    | Female | 1990 | 1,820  | (1,174 to 2,052)   | 42.3   | (27.1 to 48.0)    |
|      |        |                    |        | 2013 | 2,677  | (2,072 to 4,249)   | 25.5   | (19.8 to 40.5)    |
|      |        |                    | Both   | 1990 | 3,417  | (2,572 to 3,841)   | 42.8   | (31.8 to 48.2)    |
|      |        |                    |        | 2013 | 5,168  | (4,215 to 7,026)   | 27.4   | (22.4 to 37.0)    |
|      | Deaths | Hemorrhagic Stroke | Male   | 1990 | 954    | (773 to 1,233)     | 19.5   | (15.5 to 25.9)    |

| Country | measure | Stroke Type        | sex    | year | Counts, All Ages |                     | Rate Per 100,000 Age-standardized |                  |
|---------|---------|--------------------|--------|------|------------------|---------------------|-----------------------------------|------------------|
|         |         |                    |        |      | Mean             | 95% UI              | Mean                              | 95% UI           |
|         |         |                    |        | 2013 | 1,877            | (1,319 to 2,500)    | 19.2                              | (13.3 to 25.6)   |
|         |         |                    | Female | 1990 | 1,095            | (936 to 1,548)      | 21                                | (17.2 to 29.3)   |
|         |         |                    |        | 2013 | 1,937            | (1,341 to 2,656)    | 17.2                              | (11.9 to 23.6)   |
|         |         |                    | Both   | 1990 | 2,049            | (1,795 to 2,684)    | 20.4                              | (17.8 to 26.5)   |
|         |         |                    |        | 2013 | 3,814            | (2,955 to 4,771)    | 18.1                              | (14.0 to 22.7)   |
|         | DALYs   | Ischemic Stroke    | Male   | 1990 | 33,844           | (25,511 to 40,622)  | 654.6                             | (502.3 to 778.6) |
|         |         |                    |        | 2013 | 41,025           | (30,125 to 56,082)  | 413.9                             | (308.2 to 555.1) |
|         |         |                    | Female | 1990 | 31,065           | (20,219 to 35,192)  | 569.9                             | (370.3 to 641.7) |
|         |         |                    |        | 2013 | 35,128           | (26,422 to 56,538)  | 314.2                             | (238.8 to 504.5) |
|         |         |                    | Both   | 1990 | 64,909           | (48,985 to 73,558)  | 611.8                             | (462.9 to 688.5) |
|         |         |                    |        | 2013 | 76,153           | (60,857 to 106,415) | 361.5                             | (290.5 to 501.5) |
|         |         | Hemorrhagic Stroke | Male   | 1990 | 30,223           | (24,403 to 39,023)  | 433.6                             | (352.7 to 557.7) |
|         |         |                    |        | 2013 | 48,048           | (33,961 to 64,753)  | 402                               | (286.6 to 533.1) |
|         |         |                    | Female | 1990 | 29,253           | (24,670 to 43,885)  | 424.5                             | (363.9 to 610.6) |
|         |         |                    |        | 2013 | 43,291           | (28,953 to 57,628)  | 345.8                             | (234.4 to 459.1) |
|         |         |                    | Both   | 1990 | 59,476           | (51,109 to 79,555)  | 430.1                             | (375.0 to 566.7) |
|         |         |                    |        | 2013 | 91,340           | (69,718 to 114,733) | 373                               | (285.0 to 466.1) |
|         | YLDs    | Ischemic Stroke    | Male   | 1990 | 759              | (499 to 1,078)      | 13.8                              | (9.2 to 19.3)    |
|         |         |                    |        | 2013 | 1,696            | (1,103 to 2,398)    | 15.8                              | (10.3 to 22.1)   |
|         |         |                    | Female | 1990 | 484              | (318 to 681)        | 8.2                               | (5.3 to 11.5)    |
|         |         |                    |        | 2013 | 914              | (603 to 1,278)      | 7.7                               | (5.1 to 10.9)    |
|         |         |                    | Both   | 1990 | 1,243            | (854 to 1,726)      | 10.8                              | (7.4 to 14.9)    |
|         |         |                    |        | 2013 | 2,610            | (1,774 to 3,555)    | 11.6                              | (7.9 to 15.7)    |

|             |         |                    |        |      |             |                      |       |                    |
|-------------|---------|--------------------|--------|------|-------------|----------------------|-------|--------------------|
|             |         | Hemorrhagic Stroke | Male   | 1990 | 320         | (206 to 472)         | 4.9   | (3.1 to 7.2)       |
|             |         |                    |        | 2013 | 696         | (427 to 1,054)       | 5.8   | (3.5 to 9.0)       |
|             |         |                    | Female | 1990 | 221         | (135 to 340)         | 3.2   | (1.9 to 5.0)       |
|             |         |                    |        | 2013 | 447         | (281 to 676)         | 3.5   | (2.2 to 5.3)       |
|             |         |                    | Both   | 1990 | 542         | (354 to 760)         | 4     | (2.6 to 5.6)       |
|             |         |                    | Both   | 2013 | 1,143       | (726 to 1,650)       | 4.6   | (2.9 to 6.7)       |
| Philippines | Deaths  | Ischemic Stroke    | Male   | 1990 | 5,442       | (4,154 to 7,301)     | 67.1  | (50.6 to 91.5)     |
|             |         |                    |        | 2013 | 16,509      | (12,313 to 21,213)   | 106.3 | (80.9 to 134.7)    |
|             |         |                    | Female | 1990 | 4,501       | (3,759 to 6,230)     | 46.6  | (38.3 to 65.6)     |
|             |         |                    |        | 2013 | 14,399      | (9,511 to 18,529)    | 73.9  | (49.7 to 93.9)     |
|             |         |                    | Both   | 1990 | 9,943       | (8,195 to 12,986)    | 55.6  | (45.6 to 73.1)     |
|             |         |                    |        | 2013 | 30,908      | (23,828 to 37,365)   | 87.6  | (68.1 to 104.4)    |
|             | Deaths  | Hemorrhagic Stroke | Male   | 1990 | 8,526       | (6,675 to 10,241)    | 72.9  | (51.8 to 91.7)     |
|             |         |                    |        | 2013 | 18,133      | (13,122 to 24,887)   | 73.4  | (53.2 to 103.0)    |
|             |         |                    | Female | 1990 | 6,239       | (4,541 to 7,046)     | 50.8  | (34.9 to 58.6)     |
|             |         |                    |        |      | Counts, All | Ages                 | Rate  | Per 100,000        |
|             |         |                    |        |      |             |                      | Age-  | standardized       |
| Country     | measure | Stroke Type        | sex    | year | Mean        | 95% UI               | Mean  | 95% UI             |
|             |         |                    |        | 2013 | 13,007      | (9,731 to 17,363)    | 48.7  | (36.6 to 66.9)     |
|             |         |                    | Both   | 1990 | 14,766      | (11,931 to 16,879)   | 61    | (45.8 to 72.0)     |
|             |         |                    |        | 2013 | 31,141      | (25,051 to 39,472)   | 60    | (48.4 to 76.8)     |
|             | DALYs   | Ischemic Stroke    | Male   | 1990 | 114,108     | (88,412 to 151,670)  | 1063  | (815.6 to 1410.1)  |
|             |         |                    |        | 2013 | 338,113     | (244,714 to 442,811) | 1635  | (1227.0 to 2089.3) |
|             |         |                    | Female | 1990 | 75,908      | (64,740 to 104,025)  | 634.9 | (536.5 to 869.6)   |
|             |         |                    |        | 2013 | 233,054     | (151,450 to          | 979.2 | (650.8 to 1267.6)  |



|  |      |                    |        |      |         |                        |        |                    |
|--|------|--------------------|--------|------|---------|------------------------|--------|--------------------|
|  |      |                    |        |      |         | 307,095)               |        |                    |
|  |      |                    | Both   | 1990 | 190,016 | (158,939 to 245,038)   | 828.3  | (688.2 to 1073.8)  |
|  |      |                    |        | 2013 | 571,168 | (430,652 to 702,478)   | 1268.3 | (981.7 to 1534.4)  |
|  |      | Hemorrhagic Stroke | Male   | 1990 | 278,822 | (232,987 to 331,045)   | 1714.9 | (1352.2 to 2043.3) |
|  |      |                    |        | 2013 | 575,817 | (418,194 to 778,187)   | 1810.8 | (1323.1 to 2468.6) |
|  |      |                    | Female | 1990 | 167,911 | (133,072 to 196,131)   | 1036.4 | (789.8 to 1180.0)  |
|  |      |                    |        | 2013 | 354,102 | (260,252 to 475,174)   | 1066.5 | (787.0 to 1427.5)  |
|  |      |                    | Both   | 1990 | 446,734 | (385,709 to 501,896)   | 1361.1 | (1131.6 to 1541.1) |
|  |      |                    |        | 2013 | 929,919 | (746,636 to 1,165,740) | 1418.7 | (1148.3 to 1775.9) |
|  | YLDs | Ischemic Stroke    | Male   | 1990 | 2,852   | (1,874 to 4,096)       | 27.5   | (18.4 to 39.1)     |
|  |      |                    |        | 2013 | 6,340   | (4,089 to 8,938)       | 29.2   | (19.0 to 40.5)     |
|  |      |                    | Female | 1990 | 2,775   | (1,804 to 3,881)       | 22.1   | (14.1 to 30.9)     |
|  |      |                    |        | 2013 | 5,992   | (3,877 to 8,629)       | 22.9   | (14.7 to 33.3)     |
|  |      |                    | Both   | 1990 | 5,628   | (3,806 to 7,665)       | 24.5   | (16.5 to 33.1)     |
|  |      |                    |        | 2013 | 12,333  | (8,353 to 16,887)      | 25.7   | (17.5 to 35.4)     |
|  |      | Hemorrhagic Stroke | Male   | 1990 | 3,602   | (2,402 to 5,090)       | 29.8   | (19.9 to 42.1)     |
|  |      |                    |        | 2013 | 7,875   | (5,294 to 10,926)      | 31.6   | (21.1 to 43.5)     |
|  |      |                    | Female | 1990 | 3,030   | (2,036 to 4,246)       | 21.6   | (14.5 to 30.4)     |
|  |      |                    |        | 2013 | 6,163   | (3,990 to 8,830)       | 21.4   | (13.8 to 30.7)     |
|  |      |                    | Both   | 1990 | 6,632   | (4,565 to 9,008)       | 25.3   | (17.3 to 34.5)     |
|  |      |                    | Both   | 2013 | 14,039  | (9,577 to 19,147)      | 25.9   | (17.7 to 35.4)     |

|         |         |                    |        |      |             |                      |              |                        |
|---------|---------|--------------------|--------|------|-------------|----------------------|--------------|------------------------|
| Poland  | Deaths  | Ischemic Stroke    | Male   | 1990 | 22,120      | (19,194 to 26,716)   | 168          | (145.7 to 202.4)       |
|         |         |                    |        | 2013 | 22,964      | (18,422 to 26,915)   | 105.7        | (84.7 to 124.0)        |
|         |         |                    | Female | 1990 | 32,205      | (26,276 to 36,539)   | 133.1        | (108.4 to 151.1)       |
|         |         |                    |        | 2013 | 30,555      | (25,456 to 37,232)   | 71.2         | (60.1 to 86.9)         |
|         |         |                    | Both   | 1990 | 54,325      | (48,617 to 60,156)   | 147.1        | (131.9 to 163.0)       |
|         |         |                    |        |      | Counts, All | Ages                 | Rate         | Per 100,000            |
| Country | measure | Stroke Type        | sex    | year | Mean        | 95% UI               | Age-<br>Mean | standardized<br>95% UI |
|         |         |                    |        | 2013 | 53,520      | (46,790 to 60,371)   | 84.6         | (74.2 to 95.1)         |
|         | Deaths  | Hemorrhagic Stroke | Male   | 1990 | 9,296       | (7,029 to 11,463)    | 62.2         | (45.8 to 76.4)         |
|         |         |                    |        | 2013 | 7,591       | (5,739 to 10,475)    | 33           | (24.8 to 46.2)         |
|         |         |                    | Female | 1990 | 12,787      | (8,579 to 14,760)    | 54.1         | (36.5 to 62.2)         |
|         |         |                    |        | 2013 | 7,625       | (5,348 to 13,784)    | 20.7         | (15.2 to 35.7)         |
|         |         |                    | Both   | 1990 | 22,083      | (16,922 to 25,183)   | 58.2         | (44.0 to 66.6)         |
|         |         |                    |        | 2013 | 15,217      | (11,607 to 22,470)   | 26.2         | (20.3 to 37.5)         |
|         | DALYs   | Ischemic Stroke    | Male   | 1990 | 346,298     | (300,510 to 416,317) | 2347.1       | (2036.2 to 2824.5)     |
|         |         |                    |        | 2013 | 308,141     | (248,470 to 360,177) | 1362.5       | (1102.2 to 1588.0)     |
|         |         |                    | Female | 1990 | 373,582     | (300,893 to 417,175) | 1570.2       | (1266.9 to 1754.2)     |
|         |         |                    |        | 2013 | 279,969     | (237,170 to 348,332) | 724.4        | (609.7 to 910.5)       |
|         |         |                    | Both   | 1990 | 719,880     | (641,975 to 801,605) | 1893.5       | (1696.2 to 2105.4)     |
|         |         |                    |        | 2013 | 588,111     | (518,601 to 655,569) | 987.1        | (866.0 to 1101.3)      |
|         |         | Hemorrhagic Stroke | Male   | 1990 | 210,531     | (168,074 to 269,801) | 1248         | (976.3 to 1581.3)      |

|          |         |                    |        |      |             |                      |        |                   |
|----------|---------|--------------------|--------|------|-------------|----------------------|--------|-------------------|
|          |         |                    |        | 2013 | 165,898     | (124,775 to 211,423) | 700.6  | (535.6 to 894.6)  |
|          |         |                    | Female | 1990 | 208,885     | (154,504 to 236,320) | 922    | (690.6 to 1045.9) |
|          |         |                    |        | 2013 | 115,803     | (90,080 to 183,740)  | 373.2  | (299.2 to 563.1)  |
|          |         |                    | Both   | 1990 | 419,417     | (352,486 to 486,521) | 1074.8 | (896.8 to 1235.7) |
|          |         |                    |        | 2013 | 281,702     | (232,564 to 363,613) | 523.1  | (437.2 to 663.3)  |
|          | YLDs    | Ischemic Stroke    | Male   | 1990 | 3,177       | (1,986 to 4,616)     | 18.5   | (11.8 to 26.9)    |
|          |         |                    |        | 2013 | 5,316       | (3,427 to 7,912)     | 22.4   | (14.4 to 33.0)    |
|          |         |                    | Female | 1990 | 2,732       | (1,750 to 3,946)     | 12.2   | (7.8 to 17.5)     |
|          |         |                    |        | 2013 | 3,987       | (2,434 to 5,903)     | 12.8   | (7.8 to 19.0)     |
|          |         |                    | Both   | 1990 | 5,910       | (3,891 to 8,242)     | 15     | (10.0 to 20.8)    |
|          |         |                    |        | 2013 | 9,304       | (6,206 to 12,927)    | 17.1   | (11.3 to 23.8)    |
|          |         | Hemorrhagic Stroke | Male   | 1990 | 746         | (446 to 1,130)       | 4.2    | (2.5 to 6.3)      |
|          |         |                    |        | 2013 | 1,120       | (645 to 1,721)       | 4.8    | (2.8 to 7.4)      |
|          |         |                    | Female | 1990 | 670         | (399 to 1,022)       | 3.1    | (1.9 to 4.7)      |
|          |         |                    |        | 2013 | 961         | (556 to 1,522)       | 3.4    | (2.0 to 5.2)      |
|          |         |                    | Both   | 1990 | 1,417       | (919 to 2,027)       | 3.6    | (2.3 to 5.1)      |
|          |         |                    | Both   | 2013 | 2,082       | (1,324 to 2,964)     | 4      | (2.6 to 5.7)      |
|          |         |                    |        |      | Counts, All | Ages                 | Rate   | Per 100,000       |
|          |         |                    |        |      |             |                      | Age-   | standardized      |
| Country  | measure | Stroke Type        | sex    | year | Mean        | 95% UI               | Mean   | 95% UI            |
| Portugal | Deaths  | Ischemic Stroke    | Male   | 1990 | 6,668       | (5,658 to 7,519)     | 134.2  | (113.9 to 152.0)  |
|          |         |                    |        | 2013 | 5,086       | (3,989 to 6,349)     | 59.1   | (46.2 to 74.0)    |
|          |         |                    | Female | 1990 | 9,321       | (7,182 to 10,320)    | 113.5  | (87.3 to 125.7)   |
|          |         |                    |        | 2013 | 6,535       | (5,057 to 9,659)     | 45.2   | (34.8 to 67.6)    |

|  |        |                    |        |      |         |                      |        |                    |
|--|--------|--------------------|--------|------|---------|----------------------|--------|--------------------|
|  |        |                    | Both   | 1990 | 15,989  | (13,463 to 17,337)   | 122.6  | (103.3 to 133.0)   |
|  |        |                    |        | 2013 | 11,621  | (9,472 to 15,538)    | 51.1   | (41.6 to 68.1)     |
|  | Deaths | Hemorrhagic Stroke | Male   | 1990 | 3,753   | (3,030 to 4,690)     | 72.7   | (58.3 to 91.4)     |
|  |        |                    |        | 2013 | 3,771   | (2,585 to 4,782)     | 45.8   | (31.7 to 57.8)     |
|  |        |                    | Female | 1990 | 4,745   | (3,668 to 5,686)     | 60.6   | (47.4 to 72.1)     |
|  |        |                    |        | 2013 | 3,727   | (2,896 to 5,444)     | 28.5   | (22.6 to 41.3)     |
|  |        |                    | Both   | 1990 | 8,498   | (7,161 to 9,812)     | 66.2   | (56.0 to 76.5)     |
|  |        |                    |        | 2013 | 7,499   | (6,245 to 9,468)     | 36     | (30.3 to 45.1)     |
|  | DALYs  | Ischemic Stroke    | Male   | 1990 | 95,366  | (81,318 to 107,642)  | 1805.6 | (1539.8 to 2037.0) |
|  |        |                    |        | 2013 | 62,674  | (50,257 to 77,482)   | 749    | (599.4 to 931.4)   |
|  |        |                    | Female | 1990 | 103,903 | (79,297 to 115,526)  | 1315.4 | (1000.2 to 1463.5) |
|  |        |                    |        | 2013 | 62,957  | (49,663 to 91,431)   | 491.6  | (385.6 to 716.5)   |
|  |        |                    | Both   | 1990 | 199,270 | (169,923 to 217,260) | 1527.8 | (1303.9 to 1665.6) |
|  |        |                    |        | 2013 | 125,632 | (104,012 to 163,136) | 602.7  | (497.0 to 780.0)   |
|  |        | Hemorrhagic Stroke | Male   | 1990 | 70,582  | (58,683 to 86,970)   | 1321.3 | (1097.6 to 1624.7) |
|  |        |                    |        | 2013 | 58,961  | (41,896 to 72,691)   | 764.5  | (553.7 to 934.2)   |
|  |        |                    | Female | 1990 | 68,358  | (54,721 to 79,791)   | 954    | (760.1 to 1118.8)  |
|  |        |                    |        | 2013 | 43,199  | (35,215 to 61,686)   | 404.7  | (332.3 to 579.9)   |
|  |        |                    | Both   | 1990 | 138,941 | (121,856 to 159,675) | 1121.9 | (981.7 to 1286.7)  |
|  |        |                    |        | 2013 | 102,161 | (87,699 to 123,891)  | 568    | (488.8 to 680.0)   |
|  | YLDs   | Ischemic Stroke    | Male   | 1990 | 4,929   | (3,205 to 7,035)     | 91     | (59.8 to 130.0)    |
|  |        |                    |        | 2013 | 6,646   | (4,351 to 9,347)     | 84.1   | (55.5 to 118.4)    |

|                  |         |                    | Female | 1990 | 5,178  | (3,375 to 7,408)   | 70.9  | (46.8 to 100.6)  |
|------------------|---------|--------------------|--------|------|--------|--------------------|-------|------------------|
|                  |         |                    |        | 2013 | 8,317  | (5,233 to 11,899)  | 77.4  | (49.4 to 110.0)  |
|                  |         |                    | Both   | 1990 | 10,108 | (6,799 to 13,946)  | 79.6  | (53.5 to 109.7)  |
|                  |         |                    |        | 2013 | 14,964 | (10,135 to 20,236) | 80.5  | (54.3 to 109.3)  |
|                  |         | Hemorrhagic Stroke | Male   | 1990 | 1,266  | (687 to 2,077)     | 23.7  | (12.8 to 38.5)   |
|                  |         |                    |        | 2013 | 1,643  | (904 to 2,867)     | 21.3  | (12.0 to 37.0)   |
|                  |         |                    | Female | 1990 | 1,265  | (751 to 1,961)     | 18.2  | (10.8 to 27.9)   |
|                  |         |                    |        | 2013 | 2,211  | (1,109 to 3,667)   | 22    | (11.5 to 35.6)   |
|                  |         |                    | Both   | 1990 | 2,531  | (1,645 to 3,706)   | 20.4  | (13.3 to 29.5)   |
| Counts, All Ages |         |                    |        |      |        |                    |       |                  |
|                  |         |                    |        |      |        |                    | Rate  | Per 100,000      |
|                  |         |                    |        |      |        |                    | Age-  | standardized     |
| Country          | measure | Stroke Type        | sex    | year | Mean   | 95% UI             | Mean  | 95% UI           |
|                  |         |                    | Both   | 2013 | 3,854  | (2,371 to 5,731)   | 21.7  | (13.6 to 31.7)   |
| Qatar            | Deaths  | Ischemic Stroke    | Male   | 1990 | 17     | (12 to 24)         | 38.7  | (28.8 to 53.6)   |
|                  |         |                    |        | 2013 | 30     | (23 to 38)         | 21.7  | (16.1 to 28.4)   |
|                  |         |                    | Female | 1990 | 12     | (9 to 18)          | 49.7  | (35.5 to 70.8)   |
|                  |         |                    |        | 2013 | 17     | (12 to 23)         | 25    | (18.2 to 34.6)   |
|                  |         |                    | Both   | 1990 | 30     | (24 to 40)         | 43.3  | (35.3 to 55.3)   |
|                  |         |                    |        | 2013 | 47     | (38 to 58)         | 23.5  | (18.9 to 29.2)   |
|                  | Deaths  | Hemorrhagic Stroke | Male   | 1990 | 26     | (20 to 35)         | 25.4  | (17.8 to 34.1)   |
|                  |         |                    |        | 2013 | 52     | (38 to 69)         | 12.9  | (9.1 to 17.4)    |
|                  |         |                    | Female | 1990 | 22     | (13 to 27)         | 48.8  | (28.1 to 64.6)   |
|                  |         |                    |        | 2013 | 22     | (16 to 30)         | 19.4  | (14.2 to 27.8)   |
|                  |         |                    | Both   | 1990 | 48     | (38 to 58)         | 34.4  | (24.9 to 42.8)   |
|                  |         |                    |        | 2013 | 74     | (58 to 92)         | 16.1  | (12.9 to 20.4)   |
|                  | DALYs   | Ischemic Stroke    | Male   | 1990 | 426    | (302 to 625)       | 472.8 | (355.3 to 661.0) |
|                  |         |                    |        | 2013 | 813    | (610 to 1,074)     | 235.4 | (181.9 to 298.2) |

|         |         |                    |        |      |                  |                    |       |                   |
|---------|---------|--------------------|--------|------|------------------|--------------------|-------|-------------------|
|         |         |                    | Female | 1990 | 219              | (155 to 349)       | 596.5 | (421.4 to 877.1)  |
|         |         |                    |        | 2013 | 277              | (201 to 396)       | 244.9 | (181.0 to 335.8)  |
|         |         |                    | Both   | 1990 | 646              | (497 to 919)       | 520.4 | (425.0 to 682.4)  |
|         |         |                    |        | 2013 | 1,090            | (876 to 1,358)     | 242.5 | (201.1 to 296.6)  |
|         |         | Hemorrhagic Stroke | Male   | 1990 | 1,097            | (869 to 1,402)     | 510.5 | (391.3 to 661.4)  |
|         |         |                    |        | 2013 | 2,053            | (1,491 to 2,703)   | 225.6 | (166.3 to 290.5)  |
|         |         |                    | Female | 1990 | 834              | (494 to 1,062)     | 934.1 | (534.5 to 1195.1) |
|         |         |                    |        | 2013 | 700              | (510 to 988)       | 274.7 | (203.5 to 374.3)  |
|         |         |                    | Both   | 1990 | 1,931            | (1,548 to 2,290)   | 652.6 | (497.3 to 786.8)  |
|         |         |                    |        | 2013 | 2,753            | (2,170 to 3,425)   | 248.6 | (199.0 to 300.9)  |
|         | YLDs    | Ischemic Stroke    | Male   | 1990 | 15               | (9 to 22)          | 9.4   | (6.0 to 13.9)     |
|         |         |                    |        | 2013 | 83               | (51 to 126)        | 9.6   | (6.3 to 13.8)     |
|         |         |                    | Female | 1990 | 3                | (2 to 5)           | 6.8   | (4.3 to 9.9)      |
|         |         |                    |        | 2013 | 16               | (10 to 24)         | 7     | (4.6 to 10.0)     |
|         |         |                    | Both   | 1990 | 19               | (12 to 27)         | 8.6   | (5.7 to 12.3)     |
|         |         |                    |        | 2013 | 100              | (63 to 145)        | 8.8   | (6.0 to 12.3)     |
|         |         | Hemorrhagic Stroke | Male   | 1990 | 2                | (1 to 4)           | 1.3   | (0.7 to 2.1)      |
|         |         |                    |        | 2013 | 16               | (8 to 27)          | 1.4   | (0.7 to 2.3)      |
|         |         |                    | Female | 1990 | 1                | (0 to 1)           | 1.5   | (0.8 to 2.2)      |
|         |         |                    |        | 2013 | 4                | (2 to 7)           | 1.6   | (0.9 to 2.6)      |
|         |         |                    | Both   | 1990 | 4                | (2 to 6)           | 1.3   | (0.8 to 2.0)      |
|         |         |                    | Both   | 2013 | 21               | (12 to 33)         | 1.5   | (0.9 to 2.2)      |
| Romania | Deaths  | Ischemic Stroke    | Male   | 1990 | 15,309           | (13,171 to 18,744) | 164.4 | (140.7 to 201.4)  |
|         |         |                    |        | 2013 | 18,097           | (13,863 to 21,219) | 138.2 | (106.0 to 162.2)  |
|         |         |                    |        |      | Counts, All Ages |                    | Rate  | Per 100,000       |
|         |         |                    |        |      |                  |                    | Age-  | standardized      |
| Country | measure | Stroke Type        | sex    | year | Mean             | 95% UI             | Mean  | 95% UI            |

|  |        |                    |        |      |         |                      |        |                    |
|--|--------|--------------------|--------|------|---------|----------------------|--------|--------------------|
|  |        |                    | Female | 1990 | 18,952  | (17,265 to 22,846)   | 143.3  | (130.0 to 172.6)   |
|  |        |                    |        | 2013 | 23,928  | (17,698 to 27,064)   | 111.6  | (82.6 to 126.0)    |
|  |        |                    | Both   | 1990 | 34,262  | (31,279 to 40,227)   | 152.4  | (138.7 to 178.7)   |
|  |        |                    |        | 2013 | 42,026  | (33,300 to 46,954)   | 122.7  | (97.4 to 137.3)    |
|  | Deaths | Hemorrhagic Stroke | Male   | 1990 | 10,368  | (7,773 to 12,448)    | 98.5   | (71.2 to 119.1)    |
|  |        |                    |        | 2013 | 6,939   | (5,208 to 9,878)     | 52.2   | (39.1 to 74.8)     |
|  |        |                    | Female | 1990 | 13,093  | (9,948 to 14,552)    | 94.9   | (71.1 to 105.6)    |
|  |        |                    |        | 2013 | 8,563   | (6,780 to 12,952)    | 44     | (35.2 to 65.4)     |
|  |        |                    | Both   | 1990 | 23,461  | (18,665 to 26,370)   | 97     | (75.8 to 109.4)    |
|  |        |                    |        | 2013 | 15,502  | (12,368 to 21,820)   | 47.9   | (38.7 to 66.1)     |
|  | DALYs  | Ischemic Stroke    | Male   | 1990 | 229,688 | (198,104 to 280,011) | 2231.7 | (1932.0 to 2729.5) |
|  |        |                    |        | 2013 | 229,645 | (175,739 to 271,579) | 1717.7 | (1313.5 to 2031.9) |
|  |        |                    | Female | 1990 | 240,817 | (215,912 to 286,003) | 1750.2 | (1581.7 to 2085.0) |
|  |        |                    |        | 2013 | 239,726 | (182,049 to 270,698) | 1162.2 | (879.4 to 1307.5)  |
|  |        |                    | Both   | 1990 | 470,505 | (431,597 to 551,624) | 1963.6 | (1796.3 to 2301.9) |
|  |        |                    |        | 2013 | 469,371 | (373,983 to 526,511) | 1401.6 | (1112.1 to 1575.2) |
|  |        | Hemorrhagic Stroke | Male   | 1990 | 216,270 | (170,741 to 255,892) | 1873.9 | (1452.3 to 2229.6) |
|  |        |                    |        | 2013 | 135,572 | (107,509 to 179,549) | 1011.2 | (803.6 to 1333.5)  |
|  |        |                    | Female | 1990 | 229,616 | (184,593 to 255,051) | 1629.7 | (1307.2 to 1811.7) |
|  |        |                    |        | 2013 | 129,212 | (107,372 to 182,041) | 735.7  | (620.1 to 1021.2)  |

|                  |         |                    |        |      |         |                      |        |                    |
|------------------|---------|--------------------|--------|------|---------|----------------------|--------|--------------------|
|                  |         |                    | Both   | 1990 | 445,887 | (373,575 to 495,562) | 1749.5 | (1450.1 to 1947.7) |
|                  |         |                    |        | 2013 | 264,785 | (223,066 to 342,116) | 864.7  | (736.1 to 1111.7)  |
|                  | YLDs    | Ischemic Stroke    | Male   | 1990 | 2,715   | (1,697 to 3,829)     | 23.3   | (14.9 to 32.9)     |
|                  |         |                    |        | 2013 | 3,454   | (2,254 to 4,972)     | 25.9   | (17.0 to 37.2)     |
|                  |         |                    | Female | 1990 | 2,188   | (1,415 to 3,101)     | 15.8   | (10.2 to 22.3)     |
|                  |         |                    |        | 2013 | 2,413   | (1,521 to 3,664)     | 14.3   | (9.1 to 21.7)      |
|                  |         |                    | Both   | 1990 | 4,904   | (3,293 to 6,756)     | 19.3   | (13.0 to 26.5)     |
|                  |         |                    |        | 2013 | 5,868   | (3,884 to 8,182)     | 19.5   | (13.0 to 27.2)     |
|                  |         | Hemorrhagic Stroke | Male   | 1990 | 572     | (361 to 881)         | 4.9    | (3.1 to 7.4)       |
|                  |         |                    |        | 2013 | 710     | (426 to 1,059)       | 5.5    | (3.3 to 8.1)       |
|                  |         |                    | Female | 1990 | 499     | (282 to 784)         | 3.7    | (2.1 to 5.7)       |
| Counts, All Ages |         |                    |        |      |         |                      |        |                    |
|                  |         |                    |        |      |         |                      | Rate   | Per 100,000        |
|                  |         |                    |        |      |         |                      | Age-   | standardized       |
| Country          | measure | Stroke Type        | sex    | year | Mean    | 95% UI               | Mean   | 95% UI             |
|                  |         |                    |        | 2013 | 559     | (331 to 854)         | 3.6    | (2.2 to 5.5)       |
|                  |         |                    | Both   | 1990 | 1,071   | (683 to 1,548)       | 4.3    | (2.7 to 6.1)       |
|                  |         |                    | Both   | 2013 | 1,269   | (832 to 1,821)       | 4.5    | (2.9 to 6.4)       |
| Russia           | Deaths  | Ischemic Stroke    | Male   | 1990 | 85,667  | (70,113 to 98,839)   | 222.2  | (186.3 to 251.9)   |
|                  |         |                    |        | 2013 | 115,629 | (100,042 to 136,462) | 182.5  | (158.8 to 214.5)   |
|                  |         |                    | Female | 1990 | 205,553 | (172,085 to 230,317) | 189.7  | (158.2 to 213.3)   |
|                  |         |                    |        | 2013 | 187,190 | (165,542 to 248,975) | 126.7  | (112.4 to 168.7)   |
|                  |         |                    | Both   | 1990 | 291,220 | (251,325 to 320,652) | 200    | (172.0 to 220.6)   |
|                  |         |                    |        | 2013 | 302,819 | (273,928 to          | 146.4  | (132.9 to 180.5)   |



|  |        |                    |        |      |           |                          |        |                    |
|--|--------|--------------------|--------|------|-----------|--------------------------|--------|--------------------|
|  |        |                    |        |      |           | 373,857)                 |        |                    |
|  | Deaths | Hemorrhagic Stroke | Male   | 1990 | 21,460    | (12,103 to 32,283)       | 40     | (22.8 to 60.4)     |
|  |        |                    |        | 2013 | 29,237    | (21,781 to 36,149)       | 39.9   | (29.9 to 49.3)     |
|  |        |                    | Female | 1990 | 34,213    | (20,004 to 47,242)       | 32.9   | (19.7 to 45.1)     |
|  |        |                    |        | 2013 | 28,230    | (23,499 to 40,791)       | 22.4   | (19.0 to 32.4)     |
|  |        |                    | Both   | 1990 | 55,674    | (34,690 to 72,420)       | 35.3   | (22.0 to 45.8)     |
|  |        |                    |        | 2013 | 57,468    | (49,156 to 70,248)       | 29.3   | (25.4 to 35.3)     |
|  | DALYs  | Ischemic Stroke    | Male   | 1990 | 1,477,306 | (1,159,308 to 1,737,714) | 3127.6 | (2550.9 to 3623.7) |
|  |        |                    |        | 2013 | 1,881,206 | (1,619,270 to 2,242,051) | 2714.5 | (2345.0 to 3202.3) |
|  |        |                    | Female | 1990 | 2,598,496 | (2,124,018 to 2,940,322) | 2388.1 | (1953.0 to 2710.1) |
|  |        |                    |        | 2013 | 2,108,635 | (1,857,643 to 2,820,221) | 1534   | (1355.9 to 2050.9) |
|  |        |                    | Both   | 1990 | 4,075,802 | (3,486,591 to 4,567,371) | 2632.4 | (2257.2 to 2933.4) |
|  |        |                    |        | 2013 | 3,989,842 | (3,588,377 to 4,911,632) | 1971.2 | (1776.4 to 2411.9) |
|  |        | Hemorrhagic Stroke | Male   | 1990 | 569,556   | (330,922 to 844,376)     | 898.5  | (522.4 to 1326.9)  |
|  |        |                    |        | 2013 | 768,337   | (587,283 to 944,663)     | 975.1  | (748.4 to 1185.8)  |
|  |        |                    | Female | 1990 | 723,083   | (457,574 to 937,558)     | 735    | (480.4 to 944.0)   |
|  |        |                    |        | 2013 | 571,526   | (483,138 to 822,528)     | 506.6  | (427.5 to 743.9)   |
|  |        |                    | Both   | 1990 | 1,292,639 | (845,938 to 1,651,989)   | 796.4  | (528.9 to 1012.2)  |
|  |        |                    |        | 2013 | 1,339,864 | (1,151,769 to            | 704.2  | (614.0 to 836.7)   |

|         |         |                    |        |      |             |                    |       |                  |
|---------|---------|--------------------|--------|------|-------------|--------------------|-------|------------------|
|         |         |                    |        |      |             | 1,590,066)         |       |                  |
|         | YLDs    | Ischemic Stroke    | Male   | 1990 | 14,986      | (9,264 to 22,787)  | 23.9  | (15.0 to 34.9)   |
|         |         |                    |        |      | Counts, All | Ages               | Rate  | Per 100,000      |
|         |         |                    |        |      | Mean        | 95% UI             | Age-  | standardized     |
| Country | measure | Stroke Type        | sex    | year | Mean        | 95% UI             | Mean  | 95% UI           |
|         |         |                    |        | 2013 | 19,422      | (11,603 to 30,416) | 25.3  | (15.4 to 39.3)   |
|         |         |                    | Female | 1990 | 18,694      | (11,929 to 26,923) | 18.6  | (12.0 to 26.9)   |
|         |         |                    |        | 2013 | 19,498      | (11,354 to 29,352) | 16.7  | (9.9 to 25.1)    |
|         |         |                    | Both   | 1990 | 33,680      | (22,467 to 45,757) | 20.8  | (13.9 to 28.4)   |
|         |         |                    |        | 2013 | 38,921      | (25,222 to 56,256) | 20.1  | (13.2 to 28.8)   |
|         |         | Hemorrhagic Stroke | Male   | 1990 | 2,048       | (1,142 to 3,268)   | 3.1   | (1.8 to 4.8)     |
|         |         |                    |        | 2013 | 2,329       | (1,347 to 3,591)   | 3     | (1.7 to 4.7)     |
|         |         |                    | Female | 1990 | 2,154       | (1,314 to 3,454)   | 2.2   | (1.4 to 3.6)     |
|         |         |                    |        | 2013 | 2,281       | (1,350 to 3,571)   | 2.1   | (1.3 to 3.2)     |
|         |         |                    | Both   | 1990 | 4,202       | (2,696 to 6,080)   | 2.6   | (1.7 to 3.7)     |
|         |         |                    | Both   | 2013 | 4,610       | (2,919 to 6,632)   | 2.5   | (1.6 to 3.6)     |
| Rwanda  | Deaths  | Ischemic Stroke    | Male   | 1990 | 846         | (222 to 1,320)     | 123.8 | (33.4 to 187.2)  |
|         |         |                    |        | 2013 | 803         | (163 to 1,274)     | 65.4  | (14.0 to 102.3)  |
|         |         |                    | Female | 1990 | 1,098       | (406 to 1,774)     | 128.1 | (51.0 to 201.3)  |
|         |         |                    |        | 2013 | 865         | (285 to 1,422)     | 60.3  | (20.4 to 99.2)   |
|         |         |                    | Both   | 1990 | 1,945       | (931 to 2,770)     | 126.9 | (64.3 to 177.0)  |
|         |         |                    |        | 2013 | 1,669       | (629 to 2,390)     | 62.6  | (25.1 to 89.6)   |
|         | Deaths  | Hemorrhagic Stroke | Male   | 1990 | 1,645       | (1,146 to 2,377)   | 171.2 | (115.9 to 261.4) |
|         |         |                    |        | 2013 | 1,269       | (893 to 1,994)     | 82    | (55.6 to 138.1)  |
|         |         |                    | Female | 1990 | 1,836       | (1,072 to 3,024)   | 164.7 | (97.7 to 285.1)  |
|         |         |                    |        | 2013 | 1,255       | (766 to 2,391)     | 72    | (41.9 to 143.4)  |
|         |         |                    | Both   | 1990 | 3,482       | (2,530 to 4,901)   | 167.9 | (119.0 to 245.7) |

|         |         |                    |        |      |                  |                     |        |                    |
|---------|---------|--------------------|--------|------|------------------|---------------------|--------|--------------------|
|         |         |                    |        | 2013 | 2,524            | (1,800 to 3,932)    | 76.6   | (52.4 to 125.8)    |
|         | DALYs   | Ischemic Stroke    | Male   | 1990 | 18,464           | (4,607 to 29,409)   | 2002   | (545.8 to 3091.0)  |
|         |         |                    |        | 2013 | 13,981           | (2,858 to 22,798)   | 923.7  | (195.4 to 1470.4)  |
|         |         |                    | Female | 1990 | 20,823           | (6,840 to 36,773)   | 1958.5 | (718.1 to 3179.1)  |
|         |         |                    |        | 2013 | 13,021           | (4,128 to 21,771)   | 775.2  | (256.9 to 1270.9)  |
|         |         |                    | Both   | 1990 | 39,288           | (18,443 to 59,720)  | 1989.1 | (953.7 to 2829.6)  |
|         |         |                    |        | 2013 | 27,003           | (9,578 to 39,156)   | 842.9  | (311.0 to 1204.7)  |
|         |         | Hemorrhagic Stroke | Male   | 1990 | 48,299           | (34,542 to 66,581)  | 3670.4 | (2545.3 to 5336.4) |
|         |         |                    |        | 2013 | 31,080           | (22,491 to 46,140)  | 1500.9 | (1060.9 to 2317.4) |
|         |         |                    | Female | 1990 | 48,959           | (28,187 to 78,376)  | 3431.1 | (1991.1 to 5628.8) |
|         |         |                    |        | 2013 | 26,741           | (16,796 to 47,921)  | 1206.6 | (739.4 to 2248.6)  |
|         |         |                    | Both   | 1990 | 97,258           | (70,779 to 136,401) | 3548.4 | (2577.0 to 4998.4) |
|         |         |                    |        | 2013 | 57,822           | (42,136 to 84,042)  | 1342.9 | (966.2 to 2056.7)  |
|         | YLDs    | Ischemic Stroke    | Male   | 1990 | 135              | (82 to 204)         | 10     | (5.9 to 15.1)      |
|         |         |                    |        | 2013 | 246              | (157 to 355)        | 10.6   | (6.8 to 15.3)      |
|         |         |                    | Female | 1990 | 112              | (72 to 164)         | 7.9    | (5.1 to 11.4)      |
|         |         |                    |        |      | Counts, All Ages |                     | Rate   | Per 100,000        |
|         |         |                    |        |      |                  |                     | Age-   | standardized       |
| Country | measure | Stroke Type        | sex    | year | Mean             | 95% UI              | Mean   | 95% UI             |
|         |         |                    |        | 2013 | 204              | (122 to 304)        | 7.5    | (4.3 to 11.1)      |
|         |         |                    | Both   | 1990 | 248              | (166 to 354)        | 8.9    | (6.0 to 12.5)      |
|         |         |                    |        | 2013 | 451              | (296 to 633)        | 8.9    | (5.9 to 12.3)      |
|         |         | Hemorrhagic Stroke | Male   | 1990 | 46               | (27 to 70)          | 2.7    | (1.6 to 4.1)       |
|         |         |                    |        | 2013 | 90               | (54 to 140)         | 3      | (1.9 to 4.5)       |
|         |         |                    | Female | 1990 | 32               | (19 to 48)          | 1.9    | (1.1 to 2.7)       |
|         |         |                    |        | 2013 | 63               | (37 to 99)          | 1.9    | (1.1 to 3.0)       |

|             |        |                    |        |      |       |                  |        |                    |
|-------------|--------|--------------------|--------|------|-------|------------------|--------|--------------------|
|             |        |                    | Both   | 1990 | 78    | (50 to 113)      | 2.2    | (1.4 to 3.2)       |
|             |        |                    | Both   | 2013 | 154   | (97 to 227)      | 2.4    | (1.5 to 3.4)       |
| Saint Lucia | Deaths | Ischemic Stroke    | Male   | 1990 | 43    | (35 to 52)       | 103.2  | (86.3 to 126.1)    |
|             |        |                    |        | 2013 | 51    | (38 to 66)       | 69.7   | (51.9 to 89.6)     |
|             |        |                    | Female | 1990 | 56    | (45 to 65)       | 110    | (88.7 to 128.0)    |
|             |        |                    |        | 2013 | 70    | (47 to 92)       | 71.3   | (48.6 to 93.2)     |
|             |        |                    | Both   | 1990 | 99    | (87 to 113)      | 107.8  | (93.9 to 122.5)    |
|             |        |                    |        | 2013 | 122   | (93 to 149)      | 71.2   | (54.3 to 86.3)     |
|             | Deaths | Hemorrhagic Stroke | Male   | 1990 | 22    | (17 to 28)       | 52.2   | (41.3 to 66.9)     |
|             |        |                    |        | 2013 | 29    | (20 to 41)       | 38.7   | (27.0 to 53.4)     |
|             |        |                    | Female | 1990 | 30    | (24 to 38)       | 60.3   | (48.4 to 76.3)     |
|             |        |                    |        | 2013 | 39    | (26 to 53)       | 40.5   | (28.0 to 54.9)     |
|             |        |                    | Both   | 1990 | 53    | (46 to 63)       | 56.9   | (48.9 to 68.3)     |
|             |        |                    |        | 2013 | 68    | (51 to 86)       | 40     | (30.1 to 50.1)     |
|             | DALYs  | Ischemic Stroke    | Male   | 1990 | 774   | (646 to 930)     | 1690.9 | (1414.1 to 2025.3) |
|             |        |                    |        | 2013 | 811   | (604 to 1,054)   | 1059.6 | (792.6 to 1375.3)  |
|             |        |                    | Female | 1990 | 858   | (692 to 994)     | 1611.1 | (1280.1 to 1865.3) |
|             |        |                    |        | 2013 | 850   | (586 to 1,117)   | 919.1  | (632.8 to 1216.0)  |
|             |        |                    | Both   | 1990 | 1,633 | (1,427 to 1,836) | 1656.9 | (1445.7 to 1862.8) |
|             |        |                    |        | 2013 | 1,661 | (1,289 to 2,016) | 990.2  | (767.6 to 1205.0)  |
|             |        | Hemorrhagic Stroke | Male   | 1990 | 531   | (433 to 653)     | 1102.4 | (890.4 to 1371.2)  |
|             |        |                    |        | 2013 | 618   | (440 to 846)     | 760.3  | (544.3 to 1034.0)  |
|             |        |                    | Female | 1990 | 625   | (502 to 770)     | 1184.4 | (944.3 to 1457.4)  |
|             |        |                    |        | 2013 | 638   | (458 to 873)     | 697.5  | (499.2 to 950.9)   |
|             |        |                    | Both   | 1990 | 1,156 | (1,016 to 1,347) | 1148.5 | (1007.6 to 1333.0) |
|             |        |                    |        | 2013 | 1,257 | (972 to 1,553)   | 730    | (562.8 to 905.1)   |
|             | YLDs   | Ischemic Stroke    | Male   | 1990 | 20    | (13 to 29)       | 47     | (31.4 to 66.2)     |

|                                  |         |                    |        |      |      |              |            |                    |                 |
|----------------------------------|---------|--------------------|--------|------|------|--------------|------------|--------------------|-----------------|
|                                  |         |                    |        | 2013 | 36   | (24 to 50)   | 46.6       | (30.8 to 66.3)     |                 |
|                                  |         |                    | Female | 1990 | 17   | (10 to 25)   | 34         | (21.4 to 48.8)     |                 |
|                                  |         |                    |        | 2013 | 32   | (19 to 44)   | 34.9       | (21.8 to 48.8)     |                 |
|                                  |         |                    | Both   | 1990 | 38   | (25 to 52)   | 40         | (27.3 to 54.7)     |                 |
|                                  |         |                    |        | 2013 | 68   | (45 to 92)   | 40.4       | (26.8 to 54.8)     |                 |
| Counts, All Ages                 |         |                    |        |      |      |              |            |                    |                 |
|                                  |         |                    |        |      |      |              | Rate       | Per 100,000        |                 |
|                                  |         |                    |        |      |      |              | Age-       | standardized       |                 |
| Country                          | measure | Stroke Type        | sex    | year | Mean | 95% UI       | Mean       | 95% UI             |                 |
|                                  |         | Hemorrhagic Stroke | Male   | 1990 | 6    | (4 to 10)    | 14.7       | (8.9 to 22.6)      |                 |
|                                  |         |                    |        | 2013 | 11   | (6 to 17)    | 14.3       | (8.4 to 22.0)      |                 |
|                                  |         |                    | Female | 1990 | 5    | (3 to 9)     | 10.9       | (6.4 to 17.2)      |                 |
|                                  |         |                    |        | 2013 | 10   | (6 to 15)    | 11.5       | (7.3 to 17.1)      |                 |
|                                  |         |                    | Both   | 1990 | 12   | (8 to 17)    | 12.7       | (8.2 to 17.8)      |                 |
|                                  |         |                    | Both   | 2013 | 22   | (14 to 31)   | 12.8       | (8.2 to 18.4)      |                 |
| Saint Vincent and the Grenadines | Deaths  | Ischemic Stroke    | Male   | 1990 | 25   | (20 to 30)   | 95.9       | (76.3 to 114.5)    |                 |
|                                  |         |                    |        | 2013 | 25   | (19 to 32)   | 72.5       | (55.7 to 92.5)     |                 |
|                                  |         |                    | Female | 1990 | 39   | (30 to 45)   | 105.8      | (83.0 to 123.8)    |                 |
|                                  |         |                    |        | 2013 | 33   | (24 to 41)   | 76.6       | (55.6 to 93.5)     |                 |
|                                  |         |                    |        | Both | 1990 | 64           | (54 to 72) | 102.1              | (86.2 to 115.0) |
|                                  |         |                    |        |      | 2013 | 59           | (48 to 70) | 75.5               | (61.0 to 89.4)  |
|                                  | Deaths  | Hemorrhagic Stroke | Male   | 1990 | 13   | (10 to 16)   | 47.9       | (37.8 to 59.7)     |                 |
|                                  |         |                    |        | 2013 | 15   | (10 to 19)   | 38.3       | (27.6 to 50.4)     |                 |
|                                  |         |                    | Female | 1990 | 22   | (16 to 27)   | 61.7       | (46.1 to 75.6)     |                 |
|                                  |         |                    |        | 2013 | 19   | (14 to 25)   | 42.7       | (31.0 to 57.6)     |                 |
|                                  |         |                    |        | Both | 1990 | 36           | (30 to 42) | 56                 | (46.4 to 65.5)  |
|                                  |         |                    |        |      | 2013 | 34           | (27 to 42) | 41                 | (32.6 to 51.5)  |
|                                  | DALYs   | Ischemic Stroke    | Male   | 1990 | 451  | (364 to 533) | 1530.2     | (1243.5 to 1818.6) |                 |

|                  |         |                    |        | 2013 | 452   | (347 to 576)   | 1123.3 | (869.7 to 1425.4)  |
|------------------|---------|--------------------|--------|------|-------|----------------|--------|--------------------|
|                  |         |                    | Female | 1990 | 580   | (459 to 669)   | 1556.7 | (1220.7 to 1803.6) |
|                  |         |                    |        | 2013 | 462   | (336 to 572)   | 1029.6 | (743.5 to 1265.7)  |
|                  |         |                    | Both   | 1990 | 1,031 | (871 to 1,148) | 1550.6 | (1306.0 to 1736.5) |
|                  |         |                    |        | 2013 | 915   | (743 to 1,085) | 1082.2 | (877.9 to 1282.0)  |
|                  |         | Hemorrhagic Stroke | Male   | 1990 | 337   | (266 to 417)   | 1018.9 | (812.2 to 1246.1)  |
|                  |         |                    |        | 2013 | 358   | (265 to 461)   | 780.3  | (572.4 to 1002.7)  |
|                  |         |                    | Female | 1990 | 463   | (361 to 550)   | 1216.8 | (943.9 to 1449.5)  |
|                  |         |                    |        | 2013 | 367   | (273 to 482)   | 776.8  | (576.3 to 1020.0)  |
|                  |         |                    | Both   | 1990 | 801   | (675 to 915)   | 1130.2 | (954.6 to 1291.2)  |
|                  |         |                    |        | 2013 | 726   | (593 to 882)   | 782.4  | (638.7 to 958.2)   |
|                  | YLDs    | Ischemic Stroke    | Male   | 1990 | 12    | (7 to 18)      | 44     | (27.7 to 64.9)     |
|                  |         |                    |        | 2013 | 17    | (10 to 24)     | 42.3   | (27.3 to 60.1)     |
|                  |         |                    | Female | 1990 | 11    | (7 to 16)      | 31.4   | (20.8 to 45.6)     |
|                  |         |                    |        | 2013 | 14    | (9 to 20)      | 32.7   | (21.1 to 46.0)     |
|                  |         |                    | Both   | 1990 | 24    | (15 to 33)     | 36.9   | (24.4 to 51.3)     |
|                  |         |                    |        | 2013 | 32    | (21 to 43)     | 37.2   | (25.0 to 50.7)     |
|                  |         | Hemorrhagic Stroke | Male   | 1990 | 4     | (2 to 6)       | 13.8   | (8.2 to 21.7)      |
|                  |         |                    |        | 2013 | 5     | (3 to 8)       | 13.3   | (8.5 to 19.2)      |
| Counts, All Ages |         |                    |        |      |       |                |        | Rate               |
|                  |         |                    |        |      |       |                |        | Per 100,000        |
|                  |         |                    |        |      |       |                |        | Age-               |
|                  |         |                    |        |      |       |                |        | standardized       |
| Country          | measure | Stroke Type        | sex    | year | Mean  | 95% UI         | Mean   | 95% UI             |
|                  |         |                    | Female | 1990 | 3     | (2 to 5)       | 9.5    | (6.0 to 14.2)      |
|                  |         |                    |        | 2013 | 5     | (3 to 8)       | 11.4   | (6.7 to 18.5)      |
|                  |         |                    | Both   | 1990 | 7     | (5 to 11)      | 11.5   | (7.5 to 16.7)      |
|                  |         |                    | Both   | 2013 | 11    | (7 to 16)      | 12.3   | (8.0 to 17.6)      |
| Samoa            | Deaths  | Ischemic Stroke    | Male   | 1990 | 21    | (9 to 34)      | 83     | (38.7 to 124.4)    |

|  |        |                    |        |      |       |                  |        |                    |
|--|--------|--------------------|--------|------|-------|------------------|--------|--------------------|
|  |        |                    |        | 2013 | 26    | (13 to 44)       | 65.3   | (33.5 to 102.6)    |
|  |        |                    | Female | 1990 | 11    | (4 to 21)        | 40.7   | (17.2 to 75.1)     |
|  |        |                    |        | 2013 | 24    | (11 to 41)       | 42.4   | (19.0 to 71.2)     |
|  |        |                    | Both   | 1990 | 33    | (20 to 53)       | 59.7   | (36.8 to 91.8)     |
|  |        |                    |        | 2013 | 51    | (33 to 78)       | 51.8   | (34.1 to 76.9)     |
|  | Deaths | Hemorrhagic Stroke | Male   | 1990 | 42    | (25 to 59)       | 127.6  | (76.3 to 178.4)    |
|  |        |                    |        | 2013 | 41    | (22 to 59)       | 86.4   | (47.1 to 123.5)    |
|  |        |                    | Female | 1990 | 20    | (11 to 36)       | 61.7   | (34.4 to 110.6)    |
|  |        |                    |        | 2013 | 35    | (21 to 59)       | 60.2   | (35.8 to 99.9)     |
|  |        |                    | Both   | 1990 | 62    | (45 to 86)       | 92.3   | (67.5 to 129.2)    |
|  |        |                    |        | 2013 | 77    | (52 to 105)      | 72     | (48.6 to 98.5)     |
|  | DALYs  | Ischemic Stroke    | Male   | 1990 | 460   | (194 to 801)     | 1357.3 | (600.1 to 2201.7)  |
|  |        |                    |        | 2013 | 479   | (212 to 913)     | 968.8  | (471.4 to 1684.0)  |
|  |        |                    | Female | 1990 | 215   | (90 to 429)      | 609.6  | (262.0 to 1136.1)  |
|  |        |                    |        | 2013 | 370   | (158 to 673)     | 617.1  | (266.5 to 1111.9)  |
|  |        |                    | Both   | 1990 | 676   | (374 to 1,193)   | 960    | (567.5 to 1575.4)  |
|  |        |                    |        | 2013 | 849   | (522 to 1,413)   | 773.5  | (487.3 to 1247.9)  |
|  |        | Hemorrhagic Stroke | Male   | 1990 | 1,204 | (727 to 1,738)   | 2795.7 | (1703.6 to 3964.1) |
|  |        |                    |        | 2013 | 1,045 | (598 to 1,506)   | 1730.9 | (974.6 to 2469.9)  |
|  |        |                    | Female | 1990 | 479   | (278 to 857)     | 1154.5 | (661.9 to 2069.2)  |
|  |        |                    |        | 2013 | 705   | (430 to 1,127)   | 1120.2 | (681.0 to 1800.9)  |
|  |        |                    | Both   | 1990 | 1,684 | (1,178 to 2,329) | 1944.7 | (1379.3 to 2690.4) |
|  |        |                    |        | 2013 | 1,750 | (1,215 to 2,354) | 1416.8 | (985.2 to 1896.0)  |
|  | YLDs   | Ischemic Stroke    | Male   | 1990 | 8     | (5 to 11)        | 25.1   | (15.6 to 35.3)     |
|  |        |                    |        | 2013 | 12    | (8 to 17)        | 25.2   | (16.5 to 35.7)     |
|  |        |                    | Female | 1990 | 7     | (5 to 10)        | 20.9   | (13.8 to 30.1)     |
|  |        |                    |        | 2013 | 11    | (7 to 16)        | 20.2   | (12.6 to 29.0)     |

|                       |         |                    | Both   | 1990 | 15               | (10 to 21)   | 22.8             | (15.3 to 31.3)    |
|-----------------------|---------|--------------------|--------|------|------------------|--------------|------------------|-------------------|
|                       |         |                    |        | 2013 | 24               | (16 to 33)   | 22.5             | (14.9 to 31.0)    |
|                       |         | Hemorrhagic Stroke | Male   | 1990 | 10               | (7 to 15)    | 29.9             | (18.9 to 42.5)    |
|                       |         |                    |        | 2013 | 16               | (10 to 23)   | 30.1             | (19.2 to 42.9)    |
|                       |         |                    | Female | 1990 | 8                | (5 to 12)    | 22.3             | (14.4 to 31.4)    |
|                       |         |                    |        | 2013 | 13               | (8 to 18)    | 21.7             | (13.9 to 30.7)    |
|                       |         |                    | Both   | 1990 | 19               | (13 to 27)   | 25.8             | (17.2 to 35.3)    |
|                       |         |                    |        |      | Counts, All Ages |              | Rate Per 100,000 |                   |
|                       |         |                    |        |      |                  |              | Age-standardized |                   |
| Country               | measure | Stroke Type        | sex    | year | Mean             | 95% UI       | Mean             | 95% UI            |
|                       |         |                    | Both   | 2013 | 29               | (19 to 41)   | 25.6             | (16.7 to 35.7)    |
| Sao Tome and Principe | Deaths  | Ischemic Stroke    | Male   | 1990 | 12               | (9 to 16)    | 53.4             | (40.1 to 70.6)    |
|                       |         |                    |        | 2013 | 18               | (11 to 27)   | 58.3             | (34.9 to 85.0)    |
|                       |         |                    | Female | 1990 | 17               | (12 to 22)   | 62.6             | (46.5 to 82.7)    |
|                       |         |                    |        | 2013 | 24               | (14 to 34)   | 66.5             | (38.8 to 93.6)    |
|                       |         |                    | Both   | 1990 | 29               | (24 to 36)   | 58.6             | (46.9 to 73.1)    |
|                       |         |                    |        | 2013 | 43               | (28 to 57)   | 62.8             | (40.1 to 83.3)    |
|                       | Deaths  | Hemorrhagic Stroke | Male   | 1990 | 24               | (19 to 30)   | 89.3             | (70.7 to 111.8)   |
|                       |         |                    |        |      | 2013             | 35           | (22 to 49)       | 96.3              |
|                       |         |                    | Female | 1990 | 30               | (23 to 38)   | 99.4             | (77.9 to 125.5)   |
|                       |         |                    |        | 2013 | 41               | (27 to 55)   | 101.6            | (69.0 to 138.8)   |
|                       |         |                    | Both   | 1990 | 55               | (46 to 65)   | 95.1             | (80.6 to 113.4)   |
|                       |         |                    |        | 2013 | 76               | (54 to 97)   | 99.3             | (72.9 to 125.6)   |
|                       | DALYs   | Ischemic Stroke    | Male   | 1990 | 288              | (215 to 373) | 938.1            | (718.5 to 1218.3) |
|                       |         |                    |        |      | 2013             | 414          | (238 to 633)     | 1002.8            |
|                       |         |                    | Female | 1990 | 342              | (240 to 452) | 1044.3           | (751.8 to 1363.0) |
|                       |         |                    |        | 2013 | 477              | (290 to 688) | 1060.5           | (633.1 to 1529.6) |



|              |         |                    |        |      |             |                  |        |                    |
|--------------|---------|--------------------|--------|------|-------------|------------------|--------|--------------------|
|              |         |                    | Both   | 1990 | 631         | (507 to 779)     | 995.3  | (819.5 to 1219.5)  |
|              |         |                    |        | 2013 | 892         | (587 to 1,198)   | 1036.3 | (673.0 to 1381.5)  |
|              |         | Hemorrhagic Stroke | Male   | 1990 | 863         | (661 to 1,077)   | 2005.1 | (1589.5 to 2458.9) |
|              |         |                    |        | 2013 | 1,087       | (637 to 1,495)   | 1989.1 | (1197.3 to 2789.9) |
|              |         |                    | Female | 1990 | 879         | (607 to 1,134)   | 2051.8 | (1541.5 to 2583.8) |
|              |         |                    |        | 2013 | 1,047       | (652 to 1,431)   | 1900.2 | (1225.9 to 2658.5) |
|              |         |                    | Both   | 1990 | 1,742       | (1,359 to 2,075) | 2031.8 | (1689.3 to 2380.1) |
|              |         |                    |        | 2013 | 2,135       | (1,380 to 2,768) | 1948.1 | (1324.8 to 2527.6) |
|              | YLDs    | Ischemic Stroke    | Male   | 1990 | 4           | (2 to 6)         | 15.6   | (10.4 to 22.1)     |
|              |         |                    |        | 2013 | 6           | (4 to 9)         | 15.6   | (10.2 to 22.6)     |
|              |         |                    | Female | 1990 | 3           | (2 to 5)         | 11.4   | (7.5 to 16.7)      |
|              |         |                    |        | 2013 | 5           | (3 to 8)         | 11.9   | (7.4 to 17.6)      |
|              |         |                    | Both   | 1990 | 7           | (5 to 10)        | 13.4   | (9.2 to 18.3)      |
|              |         |                    |        | 2013 | 12          | (8 to 16)        | 13.6   | (9.2 to 18.6)      |
|              |         | Hemorrhagic Stroke | Male   | 1990 | 1           | (0 to 1)         | 4.2    | (2.7 to 6.4)       |
|              |         |                    |        | 2013 | 1           | (1 to 2)         | 4      | (2.5 to 5.8)       |
|              |         |                    | Female | 1990 | 0           | (0 to 1)         | 2.9    | (1.8 to 4.1)       |
|              |         |                    |        | 2013 | 1           | (0 to 2)         | 2.8    | (1.7 to 4.0)       |
|              |         |                    | Both   | 1990 | 2           | (1 to 3)         | 3.5    | (2.3 to 4.9)       |
|              |         |                    | Both   | 2013 | 3           | (2 to 5)         | 3.3    | (2.2 to 4.7)       |
| Saudi Arabia | Deaths  | Ischemic Stroke    | Male   | 1990 | 1,968       | (1,443 to 2,677) | 84.8   | (63.4 to 113.5)    |
|              |         |                    |        | 2013 | 3,080       | (2,372 to 4,094) | 69     | (53.5 to 90.3)     |
|              |         |                    |        |      | Counts, All | Ages             | Rate   | Per 100,000        |
|              |         |                    |        |      |             |                  | Age-   | standardized       |
| Country      | measure | Stroke Type        | sex    | year | Mean        | 95% UI           | Mean   | 95% UI             |
|              |         |                    | Female | 1990 | 1,713       | (1,276 to 2,248) | 78.8   | (58.9 to 103.9)    |
|              |         |                    |        | 2013 | 2,879       | (2,229 to 3,446) | 59.2   | (46.2 to 70.5)     |

|  |        |                    |        |      |        |                     |        |                   |
|--|--------|--------------------|--------|------|--------|---------------------|--------|-------------------|
|  |        |                    | Both   | 1990 | 3,681  | (3,037 to 4,543)    | 82     | (68.1 to 100.5)   |
|  |        |                    |        | 2013 | 5,959  | (5,057 to 6,996)    | 64.6   | (54.9 to 75.7)    |
|  | Deaths | Hemorrhagic Stroke | Male   | 1990 | 1,150  | (780 to 1,639)      | 41     | (27.6 to 57.5)    |
|  |        |                    |        | 2013 | 2,024  | (1,459 to 2,779)    | 34.4   | (24.5 to 47.6)    |
|  |        |                    | Female | 1990 | 1,016  | (682 to 1,365)      | 41     | (27.0 to 54.4)    |
|  |        |                    |        | 2013 | 1,512  | (1,141 to 1,956)    | 27.6   | (20.9 to 35.8)    |
|  |        |                    | Both   | 1990 | 2,166  | (1,583 to 2,703)    | 40.9   | (29.6 to 50.8)    |
|  |        |                    |        | 2013 | 3,537  | (2,904 to 4,337)    | 31.2   | (25.5 to 38.4)    |
|  | DALYs  | Ischemic Stroke    | Male   | 1990 | 31,685 | (22,287 to 45,291)  | 1116.8 | (796.4 to 1566.6) |
|  |        |                    |        | 2013 | 52,567 | (39,534 to 71,530)  | 879.2  | (674.3 to 1177.8) |
|  |        |                    | Female | 1990 | 23,541 | (16,736 to 31,485)  | 982.8  | (702.7 to 1303.3) |
|  |        |                    |        | 2013 | 33,052 | (24,869 to 40,072)  | 651.5  | (500.5 to 782.5)  |
|  |        |                    | Both   | 1990 | 55,226 | (44,307 to 71,125)  | 1056.6 | (849.0 to 1333.6) |
|  |        |                    |        | 2013 | 85,619 | (70,924 to 104,591) | 774.7  | (646.3 to 939.7)  |
|  |        | Hemorrhagic Stroke | Male   | 1990 | 28,823 | (19,367 to 41,937)  | 720.9  | (479.6 to 1056.8) |
|  |        |                    |        | 2013 | 49,996 | (36,249 to 68,191)  | 581.8  | (415.1 to 801.0)  |
|  |        |                    | Female | 1990 | 24,764 | (16,380 to 34,674)  | 748.6  | (488.1 to 1037.4) |
|  |        |                    |        | 2013 | 29,710 | (22,732 to 37,803)  | 441.7  | (340.2 to 560.3)  |
|  |        |                    | Both   | 1990 | 53,587 | (39,976 to 67,479)  | 729.7  | (535.9 to 929.8)  |
|  |        |                    |        | 2013 | 79,707 | (64,764 to 98,588)  | 517.4  | (418.5 to 643.5)  |
|  | YLDs   | Ischemic Stroke    | Male   | 1990 | 204    | (129 to 296)        | 5.2    | (3.2 to 7.8)      |
|  |        |                    |        | 2013 | 615    | (380 to 916)        | 6.2    | (4.0 to 9.0)      |
|  |        |                    | Female | 1990 | 70     | (44 to 97)          | 2.6    | (1.6 to 3.6)      |
|  |        |                    |        | 2013 | 222    | (140 to 321)        | 3.2    | (1.9 to 4.6)      |
|  |        |                    | Both   | 1990 | 274    | (181 to 385)        | 4.1    | (2.7 to 5.8)      |
|  |        |                    |        | 2013 | 837    | (544 to 1,204)      | 4.8    | (3.3 to 6.9)      |

|         |         |                    |        |      |             |                    |        |                   |
|---------|---------|--------------------|--------|------|-------------|--------------------|--------|-------------------|
|         |         | Hemorrhagic Stroke | Male   | 1990 | 18          | (11 to 27)         | 0.4    | (0.2 to 0.6)      |
|         |         |                    |        | 2013 | 57          | (33 to 87)         | 0.5    | (0.3 to 0.8)      |
|         |         |                    | Female | 1990 | 4           | (2 to 6)           | 0.1    | (0.1 to 0.2)      |
|         |         |                    |        | 2013 | 14          | (8 to 22)          | 0.2    | (0.1 to 0.3)      |
|         |         |                    | Both   | 1990 | 22          | (14 to 33)         | 0.3    | (0.2 to 0.4)      |
|         |         |                    | Both   | 2013 | 72          | (44 to 105)        | 0.4    | (0.2 to 0.5)      |
| Senegal | Deaths  | Ischemic Stroke    | Male   | 1990 | 667         | (436 to 887)       | 70.8   | (46.6 to 92.6)    |
|         |         |                    |        | 2013 | 1,684       | (979 to 2,237)     | 99.7   | (61.1 to 130.2)   |
|         |         |                    | Female | 1990 | 843         | (495 to 1,110)     | 80.7   | (49.4 to 107.5)   |
|         |         |                    |        | 2013 | 2,577       | (1,142 to 3,488)   | 122    | (56.4 to 162.1)   |
|         |         |                    |        |      | Counts, All | Ages               | Rate   | Per 100,000       |
|         |         |                    |        |      |             |                    | Age-   | standardized      |
| Country | measure | Stroke Type        | sex    | year | Mean        | 95% UI             | Mean   | 95% UI            |
|         |         |                    | Both   | 1990 | 1,511       | (1,100 to 1,841)   | 76.7   | (56.3 to 93.8)    |
|         |         |                    |        | 2013 | 4,262       | (2,532 to 5,339)   | 112.6  | (67.2 to 139.8)   |
|         | Deaths  | Hemorrhagic Stroke | Male   | 1990 | 643         | (445 to 910)       | 52.2   | (34.2 to 76.6)    |
|         |         |                    |        | 2013 | 921         | (545 to 1,568)     | 42.6   | (23.3 to 77.0)    |
|         |         |                    | Female | 1990 | 882         | (630 to 1,241)     | 68.1   | (46.0 to 99.4)    |
|         |         |                    |        | 2013 | 1,447       | (929 to 2,596)     | 56.1   | (34.3 to 108.3)   |
|         |         |                    | Both   | 1990 | 1,526       | (1,155 to 2,031)   | 61.2   | (44.2 to 85.1)    |
|         |         |                    |        | 2013 | 2,368       | (1,602 to 3,838)   | 50.4   | (32.5 to 88.0)    |
|         | DALYs   | Ischemic Stroke    | Male   | 1990 | 14,818      | (9,393 to 20,418)  | 1133   | (748.8 to 1503.0) |
|         |         |                    |        | 2013 | 33,028      | (18,296 to 44,511) | 1545.5 | (883.6 to 2045.0) |
|         |         |                    | Female | 1990 | 16,502      | (9,503 to 21,683)  | 1182.6 | (695.1 to 1545.5) |
|         |         |                    |        | 2013 | 44,666      | (19,108 to 62,303) | 1743   | (757.2 to 2381.1) |
|         |         |                    | Both   | 1990 | 31,320      | (22,558 to 38,373) | 1165.1 | (846.8 to 1418.3) |
|         |         |                    |        | 2013 | 77,694      | (45,897 to 98,731) | 1660.7 | (985.8 to 2089.3) |

|        |        |                    |        |      |             |                    |        |                   |
|--------|--------|--------------------|--------|------|-------------|--------------------|--------|-------------------|
|        |        | Hemorrhagic Stroke | Male   | 1990 | 19,380      | (14,009 to 26,578) | 1065.6 | (737.2 to 1503.8) |
|        |        |                    |        | 2013 | 26,291      | (17,154 to 40,813) | 879.1  | (521.0 to 1486.3) |
|        |        |                    | Female | 1990 | 23,577      | (17,168 to 32,605) | 1273.5 | (900.6 to 1784.1) |
|        |        |                    |        | 2013 | 35,743      | (24,622 to 57,313) | 1078.7 | (706.2 to 1865.4) |
|        |        |                    | Both   | 1990 | 42,957      | (33,946 to 54,643) | 1180.3 | (891.3 to 1572.5) |
|        |        |                    |        | 2013 | 62,034      | (44,996 to 88,958) | 993.3  | (681.6 to 1579.7) |
|        | YLDs   | Ischemic Stroke    | Male   | 1990 | 243         | (156 to 348)       | 15.3   | (9.8 to 21.8)     |
|        |        |                    |        | 2013 | 415         | (261 to 611)       | 15.1   | (9.6 to 22.2)     |
|        |        |                    | Female | 1990 | 196         | (127 to 288)       | 11.3   | (7.2 to 16.5)     |
|        |        |                    |        | 2013 | 397         | (253 to 563)       | 11.7   | (7.5 to 16.8)     |
|        |        |                    | Both   | 1990 | 439         | (290 to 609)       | 13.2   | (8.7 to 18.1)     |
|        |        |                    |        | 2013 | 813         | (539 to 1,137)     | 13.2   | (8.9 to 18.4)     |
|        |        | Hemorrhagic Stroke | Male   | 1990 | 77          | (48 to 118)        | 4.1    | (2.6 to 6.1)      |
|        |        |                    |        | 2013 | 132         | (80 to 194)        | 3.9    | (2.4 to 5.9)      |
|        |        |                    | Female | 1990 | 56          | (35 to 83)         | 2.8    | (1.8 to 4.2)      |
|        |        |                    |        | 2013 | 110         | (67 to 164)        | 2.8    | (1.7 to 4.2)      |
|        |        |                    | Both   | 1990 | 133         | (86 to 190)        | 3.4    | (2.2 to 4.9)      |
|        |        |                    | Both   | 2013 | 243         | (157 to 349)       | 3.3    | (2.1 to 4.7)      |
| Serbia | Deaths | Ischemic Stroke    | Male   | 1990 | 4,743       | (3,687 to 5,932)   | 137.7  | (107.8 to 171.5)  |
|        |        |                    |        | 2013 | 5,615       | (4,580 to 6,553)   | 103.3  | (84.2 to 120.9)   |
|        |        |                    | Female | 1990 | 5,565       | (4,330 to 6,839)   | 111.2  | (86.3 to 136.8)   |
|        |        |                    |        | 2013 | 7,575       | (6,252 to 8,511)   | 87.7   | (72.2 to 98.6)    |
|        |        |                    | Both   | 1990 | 10,308      | (8,605 to 12,114)  | 122.3  | (102.0 to 143.2)  |
|        |        |                    |        | 2013 | 13,190      | (11,332 to 14,526) | 94.5   | (81.2 to 104.2)   |
|        |        |                    |        |      |             |                    |        |                   |
|        |        |                    |        |      | Counts, All | Ages               | Rate   | Per 100,000       |
|        |        |                    |        |      |             |                    | Age-   | standardized      |

| Country | measure | Stroke Type        | sex    | year | Mean    | 95% UI               | Mean   | 95% UI             |
|---------|---------|--------------------|--------|------|---------|----------------------|--------|--------------------|
|         | Deaths  | Hemorrhagic Stroke | Male   | 1990 | 1,641   | (1,128 to 2,234)     | 37.3   | (25.9 to 51.1)     |
|         |         |                    |        | 2013 | 1,443   | (1,131 to 1,808)     | 24.8   | (19.2 to 31.4)     |
|         |         |                    | Female | 1990 | 2,068   | (1,327 to 2,687)     | 37.2   | (24.0 to 48.6)     |
|         |         |                    |        | 2013 | 1,720   | (1,431 to 2,386)     | 22.1   | (18.4 to 30.2)     |
|         |         |                    | Both   | 1990 | 3,710   | (2,678 to 4,602)     | 37.4   | (26.9 to 46.3)     |
|         |         |                    |        | 2013 | 3,163   | (2,758 to 3,911)     | 23.4   | (20.4 to 28.8)     |
|         | DALYs   | Ischemic Stroke    | Male   | 1990 | 71,413  | (54,023 to 91,443)   | 1843.6 | (1417.3 to 2329.8) |
|         |         |                    |        | 2013 | 75,974  | (62,020 to 88,874)   | 1318.5 | (1082.0 to 1541.5) |
|         |         |                    | Female | 1990 | 68,926  | (53,051 to 85,488)   | 1330.1 | (1022.1 to 1643.2) |
|         |         |                    |        | 2013 | 79,390  | (65,972 to 89,540)   | 962.4  | (798.5 to 1085.7)  |
|         |         |                    | Both   | 1990 | 140,339 | (115,430 to 165,934) | 1551.6 | (1290.7 to 1833.6) |
|         |         |                    |        | 2013 | 155,364 | (134,004 to 171,970) | 1120.8 | (962.3 to 1238.8)  |
|         |         | Hemorrhagic Stroke | Male   | 1990 | 41,952  | (29,709 to 56,468)   | 867.6  | (613.9 to 1180.1)  |
|         |         |                    |        | 2013 | 32,015  | (25,764 to 39,762)   | 541    | (436.7 to 668.9)   |
|         |         |                    | Female | 1990 | 46,188  | (30,139 to 59,545)   | 816.5  | (540.2 to 1047.1)  |
|         |         |                    |        | 2013 | 31,114  | (26,449 to 42,067)   | 442.9  | (378.9 to 596.9)   |
|         |         |                    | Both   | 1990 | 88,141  | (65,664 to 108,100)  | 842.2  | (630.4 to 1035.3)  |
|         |         |                    |        | 2013 | 63,130  | (55,652 to 77,050)   | 489.9  | (433.3 to 594.6)   |
|         | YLDs    | Ischemic Stroke    | Male   | 1990 | 1,068   | (700 to 1,490)       | 22.9   | (15.1 to 31.9)     |
|         |         |                    |        | 2013 | 1,531   | (999 to 2,154)       | 25.8   | (17.0 to 36.2)     |
|         |         |                    | Female | 1990 | 816     | (503 to 1,149)       | 14.8   | (9.3 to 20.9)      |
|         |         |                    |        | 2013 | 1,007   | (640 to 1,434)       | 14.2   | (9.1 to 20.4)      |
|         |         |                    | Both   | 1990 | 1,885   | (1,253 to 2,576)     | 18.5   | (12.3 to 25.2)     |
|         |         |                    |        | 2013 | 2,539   | (1,725 to 3,450)     | 19.5   | (13.3 to 26.6)     |

|            |         |                    |        |      |             |              |        |                    |
|------------|---------|--------------------|--------|------|-------------|--------------|--------|--------------------|
|            |         | Hemorrhagic Stroke | Male   | 1990 | 234         | (134 to 360) | 4.9    | (2.9 to 7.5)       |
|            |         |                    |        | 2013 | 315         | (188 to 481) | 5.5    | (3.3 to 8.4)       |
|            |         |                    | Female | 1990 | 184         | (113 to 289) | 3.4    | (2.1 to 5.2)       |
|            |         |                    |        | 2013 | 235         | (139 to 350) | 3.6    | (2.2 to 5.2)       |
|            |         |                    | Both   | 1990 | 419         | (274 to 604) | 4.1    | (2.7 to 5.9)       |
|            |         |                    | Both   | 2013 | 551         | (348 to 778) | 4.5    | (2.8 to 6.4)       |
| Seychelles | Deaths  | Ischemic Stroke    | Male   | 1990 | 21          | (16 to 27)   | 113.8  | (83.2 to 141.4)    |
|            |         |                    |        | 2013 | 23          | (14 to 31)   | 78.2   | (50.1 to 105.4)    |
|            |         |                    | Female | 1990 | 18          | (13 to 23)   | 59.8   | (46.0 to 76.1)     |
|            |         |                    |        | 2013 | 26          | (12 to 38)   | 52.4   | (24.2 to 78.1)     |
|            |         |                    | Both   | 1990 | 40          | (32 to 46)   | 82     | (66.4 to 95.6)     |
|            |         |                    |        | 2013 | 49          | (30 to 65)   | 63.5   | (38.9 to 83.7)     |
|            |         |                    |        |      |             |              |        |                    |
|            |         |                    |        |      | Counts, All | Ages         | Rate   | Per 100,000        |
|            |         |                    |        |      |             |              | Age-   | standardized       |
| Country    | measure | Stroke Type        | sex    | year | Mean        | 95% UI       | Mean   | 95% UI             |
|            | Deaths  | Hemorrhagic Stroke | Male   | 1990 | 19          | (14 to 25)   | 93.3   | (70.3 to 126.1)    |
|            |         |                    |        | 2013 | 19          | (10 to 30)   | 58.1   | (30.1 to 96.4)     |
|            |         |                    | Female | 1990 | 18          | (14 to 28)   | 63.8   | (48.6 to 96.0)     |
|            |         |                    |        | 2013 | 23          | (14 to 39)   | 48.6   | (30.0 to 82.0)     |
|            |         |                    | Both   | 1990 | 38          | (30 to 52)   | 77.4   | (61.7 to 105.6)    |
|            |         |                    |        | 2013 | 43          | (28 to 66)   | 53.8   | (35.6 to 83.9)     |
|            | DALYs   | Ischemic Stroke    | Male   | 1990 | 406         | (293 to 522) | 1967   | (1434.3 to 2515.0) |
|            |         |                    |        | 2013 | 434         | (265 to 598) | 1227   | (766.5 to 1659.9)  |
|            |         |                    | Female | 1990 | 255         | (196 to 317) | 881.9  | (671.3 to 1087.7)  |
|            |         |                    |        | 2013 | 321         | (154 to 475) | 683.4  | (325.9 to 1013.6)  |
|            |         |                    | Both   | 1990 | 661         | (528 to 787) | 1356.8 | (1081.9 to 1617.2) |

|              |        |                    |        |      |       |                |        |                    |
|--------------|--------|--------------------|--------|------|-------|----------------|--------|--------------------|
|              |        |                    |        | 2013 | 756   | (482 to 994)   | 931.1  | (594.8 to 1220.1)  |
|              |        | Hemorrhagic Stroke | Male   | 1990 | 483   | (372 to 637)   | 2096.9 | (1607.0 to 2773.3) |
|              |        |                    |        | 2013 | 476   | (290 to 704)   | 1170.7 | (695.2 to 1765.9)  |
|              |        |                    | Female | 1990 | 335   | (268 to 481)   | 1189.7 | (952.3 to 1690.9)  |
|              |        |                    |        | 2013 | 375   | (256 to 589)   | 804.3  | (550.2 to 1268.2)  |
|              |        |                    | Both   | 1990 | 819   | (671 to 1,061) | 1618.6 | (1321.1 to 2106.3) |
|              |        |                    |        | 2013 | 852   | (607 to 1,188) | 987.5  | (694.6 to 1403.0)  |
|              | YLDs   | Ischemic Stroke    | Male   | 1990 | 5     | (3 to 8)       | 29.7   | (19.5 to 41.8)     |
|              |        |                    |        | 2013 | 10    | (6 to 14)      | 29.7   | (19.9 to 41.5)     |
|              |        |                    | Female | 1990 | 6     | (4 to 8)       | 22.2   | (14.4 to 30.9)     |
|              |        |                    |        | 2013 | 10    | (6 to 14)      | 23     | (15.1 to 32.9)     |
|              |        |                    | Both   | 1990 | 12    | (8 to 16)      | 25.3   | (17.0 to 34.6)     |
|              |        |                    |        | 2013 | 20    | (14 to 28)     | 25.8   | (17.8 to 35.4)     |
|              |        | Hemorrhagic Stroke | Male   | 1990 | 6     | (4 to 9)       | 32     | (21.0 to 44.4)     |
|              |        |                    |        | 2013 | 11    | (7 to 16)      | 31.6   | (20.7 to 44.4)     |
|              |        |                    | Female | 1990 | 6     | (3 to 8)       | 21.5   | (14.2 to 30.3)     |
|              |        |                    |        | 2013 | 10    | (6 to 13)      | 22     | (14.6 to 30.3)     |
|              |        |                    | Both   | 1990 | 12    | (8 to 17)      | 26.1   | (17.7 to 36.1)     |
|              |        |                    | Both   | 2013 | 21    | (14 to 29)     | 26.2   | (17.9 to 35.4)     |
| Sierra Leone | Deaths | Ischemic Stroke    | Male   | 1990 | 460   | (297 to 623)   | 78.4   | (53.1 to 103.6)    |
|              |        |                    |        | 2013 | 853   | (358 to 1,218) | 117.4  | (54.1 to 163.4)    |
|              |        |                    | Female | 1990 | 361   | (206 to 484)   | 70.2   | (42.1 to 94.4)     |
|              |        |                    |        | 2013 | 692   | (251 to 991)   | 103.8  | (40.8 to 145.7)    |
|              |        |                    | Both   | 1990 | 822   | (568 to 1,024) | 74.2   | (54.4 to 92.3)     |
|              |        |                    |        | 2013 | 1,546 | (732 to 2,134) | 110.3  | (57.1 to 146.6)    |
|              | Deaths | Hemorrhagic Stroke | Male   | 1990 | 598   | (453 to 807)   | 72.6   | (53.9 to 99.5)     |

|         |         |                    |        | 2013        | 736    | (432 to 1,243)     | 70     | (37.1 to 132.2)    |
|---------|---------|--------------------|--------|-------------|--------|--------------------|--------|--------------------|
|         |         |                    |        | Counts, All |        | Ages               |        | Rate               |
|         |         |                    |        |             |        |                    |        | Per 100,000        |
| Country | measure | Stroke Type        | sex    | year        | Mean   | 95% UI             | Mean   | 95% UI             |
|         |         |                    | Female | 1990        | 473    | (335 to 670)       | 63.9   | (43.3 to 97.0)     |
|         |         |                    |        | 2013        | 627    | (416 to 1,144)     | 62.1   | (37.2 to 127.5)    |
|         |         |                    | Both   | 1990        | 1,071  | (862 to 1,378)     | 68.2   | (54.5 to 90.4)     |
|         |         |                    |        | 2013        | 1,364  | (907 to 2,201)     | 65.9   | (39.5 to 121.9)    |
|         | DALYs   | Ischemic Stroke    | Male   | 1990        | 11,341 | (6,984 to 15,926)  | 1331.5 | (878.4 to 1769.6)  |
|         |         |                    |        | 2013        | 19,579 | (7,984 to 28,216)  | 1922.9 | (839.1 to 2690.8)  |
|         |         |                    | Female | 1990        | 8,440  | (4,381 to 11,620)  | 1061.2 | (622.7 to 1408.6)  |
|         |         |                    |        | 2013        | 14,614 | (4,778 to 21,388)  | 1506.3 | (568.5 to 2130.9)  |
|         |         |                    | Both   | 1990        | 19,782 | (13,552 to 25,398) | 1195.4 | (833.8 to 1486.7)  |
|         |         |                    |        | 2013        | 34,193 | (15,490 to 47,755) | 1706.1 | (842.4 to 2327.2)  |
|         |         | Hemorrhagic Stroke | Male   | 1990        | 21,220 | (15,994 to 28,049) | 1658.1 | (1254.9 to 2239.7) |
|         |         |                    |        | 2013        | 24,481 | (15,529 to 37,546) | 1550.3 | (898.9 to 2658.6)  |
|         |         |                    | Female | 1990        | 16,004 | (10,742 to 21,837) | 1313.6 | (919.8 to 1877.7)  |
|         |         |                    |        | 2013        | 19,463 | (13,356 to 33,047) | 1260.8 | (837.3 to 2297.1)  |
|         |         |                    | Both   | 1990        | 37,224 | (29,621 to 46,893) | 1484.5 | (1187.6 to 1913.4) |
|         |         |                    |        | 2013        | 43,945 | (31,464 to 64,272) | 1401   | (920.7 to 2291.0)  |
|         | YLDs    | Ischemic Stroke    | Male   | 1990        | 145    | (87 to 211)        | 15.4   | (9.5 to 22.1)      |
|         |         |                    |        | 2013        | 202    | (128 to 293)       | 15.6   | (9.9 to 22.2)      |
|         |         |                    | Female | 1990        | 113    | (73 to 165)        | 11.8   | (7.7 to 17.4)      |
|         |         |                    |        | 2013        | 157    | (97 to 235)        | 11.2   | (6.8 to 16.6)      |
|         |         |                    | Both   | 1990        | 258    | (172 to 362)       | 13.6   | (9.0 to 19.0)      |
|         |         |                    |        | 2013        | 360    | (239 to 503)       | 13.3   | (8.8 to 18.7)      |
|         |         | Hemorrhagic Stroke | Male   | 1990        | 46     | (28 to 69)         | 4.2    | (2.6 to 6.3)       |



|           |         |                    |        |      |             |                    |       |                   |
|-----------|---------|--------------------|--------|------|-------------|--------------------|-------|-------------------|
|           |         |                    |        | 2013 | 62          | (38 to 93)         | 3.9   | (2.5 to 5.8)      |
|           |         |                    | Female | 1990 | 33          | (20 to 49)         | 3     | (1.9 to 4.5)      |
|           |         |                    |        | 2013 | 45          | (27 to 67)         | 2.7   | (1.6 to 3.9)      |
|           |         |                    | Both   | 1990 | 79          | (51 to 113)        | 3.6   | (2.4 to 5.1)      |
|           |         |                    | Both   | 2013 | 108         | (69 to 154)        | 3.3   | (2.1 to 4.7)      |
| Singapore | Deaths  | Ischemic Stroke    | Male   | 1990 | 373         | (293 to 450)       | 56.1  | (44.2 to 67.6)    |
|           |         |                    |        | 2013 | 589         | (459 to 792)       | 30.7  | (24.0 to 41.3)    |
|           |         |                    | Female | 1990 | 523         | (374 to 604)       | 59.5  | (42.4 to 68.6)    |
|           |         |                    |        | 2013 | 897         | (648 to 1,317)     | 30.4  | (22.3 to 44.7)    |
|           |         |                    | Both   | 1990 | 897         | (732 to 1,005)     | 58.6  | (47.6 to 65.6)    |
|           |         |                    |        | 2013 | 1,487       | (1,227 to 1,984)   | 30.9  | (25.5 to 41.0)    |
|           | Deaths  | Hemorrhagic Stroke | Male   | 1990 | 351         | (284 to 435)       | 42.4  | (33.8 to 52.8)    |
|           |         |                    |        | 2013 | 454         | (314 to 572)       | 22.1  | (15.2 to 28.0)    |
|           |         |                    | Female | 1990 | 431         | (323 to 518)       | 45.8  | (33.9 to 55.0)    |
|           |         |                    |        | 2013 | 551         | (366 to 783)       | 19.7  | (13.4 to 28.0)    |
|           |         |                    | Both   | 1990 | 783         | (667 to 899)       | 44.7  | (37.7 to 52.2)    |
|           |         |                    |        |      | Counts, All | Ages               | Rate  | Per 100,000       |
|           |         |                    |        |      |             |                    | Age-  | standardized      |
| Country   | measure | Stroke Type        | sex    | year | Mean        | 95% UI             | Mean  | 95% UI            |
|           |         |                    |        | 2013 | 1,006       | (745 to 1,226)     | 21.1  | (15.8 to 25.7)    |
|           | DALYs   | Ischemic Stroke    | Male   | 1990 | 6,868       | (5,499 to 8,154)   | 864.6 | (689.1 to 1024.4) |
|           |         |                    |        | 2013 | 8,790       | (7,158 to 11,148)  | 435   | (354.4 to 551.9)  |
|           |         |                    | Female | 1990 | 7,179       | (5,135 to 8,272)   | 766.9 | (552.2 to 882.5)  |
|           |         |                    |        | 2013 | 8,713       | (6,680 to 12,483)  | 327.3 | (250.3 to 466.7)  |
|           |         |                    | Both   | 1990 | 14,047      | (11,732 to 15,739) | 817.3 | (678.4 to 911.5)  |
|           |         |                    |        | 2013 | 17,504      | (14,830 to 22,213) | 378.6 | (319.9 to 479.6)  |
|           |         | Hemorrhagic Stroke | Male   | 1990 | 8,873       | (7,334 to 10,704)  | 890.7 | (735.5 to 1086.2) |

|          |        |                    |        |      |        |                    |       |                  |
|----------|--------|--------------------|--------|------|--------|--------------------|-------|------------------|
|          |        |                    |        | 2013 | 8,990  | (6,943 to 11,040)  | 404.2 | (313.5 to 493.4) |
|          |        |                    | Female | 1990 | 8,696  | (6,633 to 10,189)  | 843.2 | (641.4 to 990.4) |
|          |        |                    |        | 2013 | 7,418  | (5,521 to 10,446)  | 291   | (217.9 to 410.1) |
|          |        |                    | Both   | 1990 | 17,570 | (15,243 to 19,773) | 870.4 | (752.7 to 982.2) |
|          |        |                    |        | 2013 | 16,409 | (13,399 to 19,785) | 346.3 | (284.0 to 414.2) |
|          | YLDs   | Ischemic Stroke    | Male   | 1990 | 819    | (524 to 1,166)     | 97.1  | (62.8 to 137.5)  |
|          |        |                    |        | 2013 | 1,898  | (1,262 to 2,622)   | 90    | (60.4 to 123.7)  |
|          |        |                    | Female | 1990 | 561    | (350 to 823)       | 57    | (35.5 to 83.7)   |
|          |        |                    |        | 2013 | 1,371  | (859 to 1,988)     | 53.8  | (33.5 to 77.7)   |
|          |        |                    | Both   | 1990 | 1,381  | (926 to 1,868)     | 75.2  | (50.4 to 101.8)  |
|          |        |                    |        | 2013 | 3,270  | (2,184 to 4,514)   | 70.5  | (46.7 to 97.1)   |
|          |        | Hemorrhagic Stroke | Male   | 1990 | 311    | (201 to 448)       | 33.1  | (21.4 to 48.3)   |
|          |        |                    |        | 2013 | 704    | (452 to 1,022)     | 32.7  | (21.2 to 46.8)   |
|          |        |                    | Female | 1990 | 229    | (142 to 347)       | 21.2  | (13.2 to 32.5)   |
|          |        |                    |        | 2013 | 591    | (371 to 883)       | 23.5  | (14.7 to 34.9)   |
|          |        |                    | Both   | 1990 | 540    | (357 to 746)       | 26.5  | (17.4 to 37.1)   |
|          |        |                    | Both   | 2013 | 1,296  | (839 to 1,818)     | 27.7  | (18.1 to 39.0)   |
| Slovakia | Deaths | Ischemic Stroke    | Male   | 1990 | 3,006  | (2,535 to 3,550)   | 158.8 | (133.3 to 188.1) |
|          |        |                    |        | 2013 | 2,530  | (2,118 to 3,100)   | 100.6 | (84.0 to 122.5)  |
|          |        |                    | Female | 1990 | 3,448  | (2,737 to 3,992)   | 111.5 | (88.5 to 129.6)  |
|          |        |                    |        | 2013 | 3,230  | (2,742 to 4,080)   | 66.5  | (56.6 to 83.4)   |
|          |        |                    | Both   | 1990 | 6,454  | (5,740 to 7,279)   | 130.4 | (115.5 to 147.0) |
|          |        |                    |        | 2013 | 5,760  | (5,095 to 6,823)   | 79.3  | (70.1 to 93.8)   |
|          | Deaths | Hemorrhagic Stroke | Male   | 1990 | 917    | (643 to 1,161)     | 41.7  | (29.1 to 52.9)   |
|          |        |                    |        | 2013 | 686    | (469 to 862)       | 23.5  | (16.0 to 29.8)   |
|          |        |                    | Female | 1990 | 1,079  | (695 to 1,271)     | 35    | (22.5 to 41.4)   |
|          |        |                    |        | 2013 | 709    | (522 to 994)       | 15.8  | (11.7 to 21.8)   |

|         |         |                    |        | Both             | 1990   | 1,997              | (1,481 to 2,346) | 38.2               | (28.1 to 44.9) |
|---------|---------|--------------------|--------|------------------|--------|--------------------|------------------|--------------------|----------------|
|         |         |                    |        |                  | 2013   | 1,396              | (1,120 to 1,704) | 19.1               | (15.4 to 23.4) |
|         | DALYs   | Ischemic Stroke    | Male   | 1990             | 46,385 | (39,440 to 55,071) | 2237.5           | (1900.4 to 2637.4) |                |
|         |         |                    |        | 2013             | 37,112 | (31,083 to 45,690) | 1337.5           | (1122.6 to 1635.6) |                |
|         |         |                    |        | Counts, All Ages |        | Rate               |                  | Per 100,000        |                |
| Country | measure | Stroke Type        | sex    | year             | Mean   | 95% UI             | Mean             | 95% UI             |                |
|         |         |                    |        |                  |        | Age-               |                  | standardized       |                |
|         |         |                    | Female | 1990             | 41,801 | (33,798 to 48,518) | 1354             | (1090.7 to 1570.2) |                |
|         |         |                    |        | 2013             | 33,956 | (29,070 to 41,939) | 740.2            | (635.8 to 909.5)   |                |
|         |         |                    | Both   | 1990             | 88,187 | (79,276 to 99,689) | 1723.4           | (1548.7 to 1939.1) |                |
|         |         |                    |        | 2013             | 71,069 | (63,031 to 83,249) | 982.1            | (872.0 to 1151.9)  |                |
|         |         | Hemorrhagic Stroke | Male   | 1990             | 21,797 | (15,803 to 27,535) | 918.4            | (661.0 to 1159.9)  |                |
|         |         |                    |        | 2013             | 15,441 | (10,706 to 19,298) | 484.5            | (338.4 to 609.4)   |                |
|         |         |                    | Female | 1990             | 20,237 | (13,768 to 23,412) | 669.7            | (457.9 to 777.0)   |                |
|         |         |                    |        | 2013             | 11,728 | (9,059 to 15,699)  | 284.4            | (222.3 to 374.9)   |                |
|         |         |                    | Both   | 1990             | 42,035 | (32,127 to 48,984) | 785.6            | (601.8 to 917.1)   |                |
|         |         |                    |        | 2013             | 27,170 | (22,281 to 32,464) | 375.5            | (306.9 to 448.1)   |                |
|         | YLDs    | Ischemic Stroke    | Male   | 1990             | 547    | (360 to 783)       | 23.7             | (15.6 to 33.7)     |                |
|         |         |                    |        | 2013             | 784    | (507 to 1,114)     | 24.8             | (16.0 to 35.2)     |                |
|         |         |                    | Female | 1990             | 460    | (298 to 655)       | 15.4             | (10.0 to 21.9)     |                |
|         |         |                    |        | 2013             | 597    | (373 to 866)       | 14.7             | (9.3 to 21.3)      |                |
|         |         |                    | Both   | 1990             | 1,008  | (668 to 1,383)     | 19               | (12.6 to 26.1)     |                |
|         |         |                    |        | 2013             | 1,381  | (936 to 1,891)     | 19.2             | (13.0 to 26.4)     |                |
|         |         | Hemorrhagic Stroke | Male   | 1990             | 122    | (76 to 181)        | 5.1              | (3.2 to 7.5)       |                |
|         |         |                    |        | 2013             | 176    | (109 to 260)       | 5.6              | (3.5 to 8.2)       |                |
|         |         |                    | Female | 1990             | 109    | (67 to 161)        | 3.8              | (2.4 to 5.5)       |                |
|         |         |                    |        | 2013             | 146    | (90 to 222)        | 3.9              | (2.4 to 5.8)       |                |

|          |         |                    | Both   | 1990 | 232              | (153 to 326)       | 4.4    | (2.9 to 6.1)       |
|----------|---------|--------------------|--------|------|------------------|--------------------|--------|--------------------|
|          |         |                    | Both   | 2013 | 323              | (207 to 455)       | 4.6    | (3.0 to 6.5)       |
| Slovenia | Deaths  | Ischemic Stroke    | Male   | 1990 | 920              | (774 to 1,071)     | 128.1  | (106.9 to 149.8)   |
|          |         |                    |        | 2013 | 779              | (610 to 942)       | 56.5   | (43.9 to 68.3)     |
|          |         |                    | Female | 1990 | 1,349            | (1,041 to 1,487)   | 95.3   | (73.5 to 105.2)    |
|          |         |                    |        | 2013 | 1,207            | (929 to 1,528)     | 43.7   | (34.0 to 55.2)     |
|          |         |                    | Both   | 1990 | 2,269            | (1,931 to 2,478)   | 107.4  | (91.3 to 117.2)    |
|          |         |                    |        | 2013 | 1,987            | (1,654 to 2,310)   | 49     | (40.8 to 56.9)     |
|          | Deaths  | Hemorrhagic Stroke | Male   | 1990 | 275              | (224 to 371)       | 31     | (25.0 to 42.7)     |
|          |         |                    |        | 2013 | 249              | (165 to 317)       | 17.4   | (11.5 to 22.2)     |
|          |         |                    | Female | 1990 | 329              | (257 to 438)       | 24.2   | (18.9 to 32.1)     |
|          |         |                    |        | 2013 | 305              | (202 to 406)       | 13.4   | (9.4 to 17.3)      |
|          |         |                    | Both   | 1990 | 605              | (530 to 762)       | 27.2   | (23.8 to 34.6)     |
|          |         |                    |        | 2013 | 554              | (407 to 673)       | 15.3   | (11.5 to 18.4)     |
|          | DALYs   | Ischemic Stroke    | Male   | 1990 | 13,601           | (11,447 to 15,714) | 1725   | (1460.8 to 1996.1) |
|          |         |                    |        | 2013 | 9,329            | (7,394 to 11,136)  | 649.6  | (511.4 to 776.0)   |
|          |         |                    | Female | 1990 | 15,041           | (11,412 to 16,496) | 1090.5 | (824.1 to 1196.0)  |
|          |         |                    |        | 2013 | 9,796            | (7,693 to 12,221)  | 398.2  | (313.9 to 503.6)   |
|          |         |                    | Both   | 1990 | 28,643           | (24,386 to 31,325) | 1335.4 | (1135.0 to 1458.7) |
|          |         |                    |        |      | Counts, All Ages |                    | Rate   | Per 100,000        |
|          |         |                    |        |      |                  |                    | Age-   | standardized       |
| Country  | measure | Stroke Type        | sex    | year | Mean             | 95% UI             | Mean   | 95% UI             |
|          |         |                    |        | 2013 | 19,125           | (16,159 to 21,934) | 505.7  | (428.3 to 581.1)   |
|          |         | Hemorrhagic Stroke | Male   | 1990 | 7,108            | (5,849 to 9,141)   | 725.7  | (596.4 to 938.3)   |
|          |         |                    |        | 2013 | 4,861            | (3,410 to 6,114)   | 336.1  | (236.7 to 422.2)   |
|          |         |                    | Female | 1990 | 6,644            | (5,210 to 8,415)   | 514.4  | (402.5 to 645.4)   |
|          |         |                    |        | 2013 | 4,073            | (3,018 to 5,225)   | 225.3  | (172.6 to 288.0)   |

|                 |        |                    |        |      |        |                    |       |                   |
|-----------------|--------|--------------------|--------|------|--------|--------------------|-------|-------------------|
|                 |        |                    | Both   | 1990 | 13,753 | (12,159 to 16,614) | 611.2 | (539.7 to 740.7)  |
|                 |        |                    |        | 2013 | 8,934  | (7,116 to 10,480)  | 278.5 | (222.8 to 326.3)  |
|                 | YLDs   | Ischemic Stroke    | Male   | 1990 | 226    | (142 to 323)       | 24    | (15.2 to 34.2)    |
|                 |        |                    |        | 2013 | 343    | (213 to 517)       | 23.7  | (14.7 to 35.3)    |
|                 |        |                    | Female | 1990 | 209    | (136 to 297)       | 16.2  | (10.5 to 23.0)    |
|                 |        |                    |        | 2013 | 255    | (164 to 362)       | 14.5  | (9.4 to 20.7)     |
|                 |        |                    | Both   | 1990 | 436    | (291 to 603)       | 19.6  | (13.1 to 27.1)    |
|                 |        |                    |        | 2013 | 599    | (400 to 827)       | 18.9  | (12.6 to 26.1)    |
|                 |        | Hemorrhagic Stroke | Male   | 1990 | 50     | (29 to 77)         | 5.1   | (3.0 to 7.8)      |
|                 |        |                    |        | 2013 | 78     | (45 to 120)        | 5.7   | (3.3 to 8.6)      |
|                 |        |                    | Female | 1990 | 47     | (27 to 72)         | 3.9   | (2.2 to 5.9)      |
|                 |        |                    |        | 2013 | 61     | (36 to 93)         | 4     | (2.4 to 5.9)      |
|                 |        |                    | Both   | 1990 | 98     | (62 to 142)        | 4.4   | (2.8 to 6.4)      |
|                 |        |                    | Both   | 2013 | 139    | (89 to 200)        | 4.8   | (3.0 to 6.8)      |
| Solomon Islands | Deaths | Ischemic Stroke    | Male   | 1990 | 38     | (16 to 58)         | 77.9  | (35.1 to 113.8)   |
|                 |        |                    |        | 2013 | 73     | (32 to 117)        | 77.2  | (35.5 to 118.3)   |
|                 |        |                    | Female | 1990 | 20     | (11 to 31)         | 51.3  | (30.4 to 79.1)    |
|                 |        |                    |        | 2013 | 56     | (24 to 86)         | 62.7  | (30.4 to 94.9)    |
|                 |        |                    | Both   | 1990 | 58     | (29 to 84)         | 66.1  | (34.4 to 91.4)    |
|                 |        |                    |        | 2013 | 130    | (62 to 195)        | 70.1  | (35.6 to 101.7)   |
|                 | Deaths | Hemorrhagic Stroke | Male   | 1990 | 82     | (51 to 120)        | 134   | (86.3 to 190.3)   |
|                 |        |                    |        | 2013 | 170    | (108 to 259)       | 140.2 | (92.1 to 205.9)   |
|                 |        |                    | Female | 1990 | 45     | (27 to 72)         | 90.8  | (56.0 to 146.1)   |
|                 |        |                    |        | 2013 | 118    | (68 to 188)        | 108.7 | (63.8 to 164.5)   |
|                 |        |                    | Both   | 1990 | 128    | (83 to 188)        | 113.9 | (76.6 to 158.1)   |
|                 |        |                    |        | 2013 | 289    | (184 to 434)       | 124.6 | (81.1 to 180.9)   |
|                 | DALYs  | Ischemic Stroke    | Male   | 1990 | 858    | (353 to 1,371)     | 1392  | (611.7 to 2128.4) |

|         |         |                    |        |      |             |                   |              |                        |
|---------|---------|--------------------|--------|------|-------------|-------------------|--------------|------------------------|
|         |         |                    |        | 2013 | 1,599       | (684 to 2,699)    | 1316.2       | (596.9 to 2106.0)      |
|         |         |                    | Female | 1990 | 468         | (229 to 758)      | 884.1        | (488.5 to 1342.4)      |
|         |         |                    |        | 2013 | 1,165       | (462 to 1,917)    | 1017.3       | (451.5 to 1563.3)      |
|         |         |                    | Both   | 1990 | 1,327       | (625 to 2,077)    | 1158.9       | (584.2 to 1689.7)      |
|         |         |                    |        | 2013 | 2,764       | (1,258 to 4,458)  | 1169         | (568.3 to 1776.6)      |
|         |         | Hemorrhagic Stroke | Male   | 1990 | 2,512       | (1,519 to 3,794)  | 3192.8       | (1983.4 to 4693.2)     |
|         |         |                    |        |      | Counts, All | Ages              | Rate         | Per 100,000            |
| Country | measure | Stroke Type        | sex    | year | Mean        | 95% UI            | Age-<br>Mean | standardized<br>95% UI |
|         |         |                    |        | 2013 | 5,103       | (3,118 to 8,053)  | 3258.2       | (2051.4 to 4974.3)     |
|         |         |                    | Female | 1990 | 1,330       | (813 to 2,123)    | 1971         | (1187.2 to 3104.8)     |
|         |         |                    |        | 2013 | 3,210       | (1,823 to 5,247)  | 2265         | (1300.7 to 3619.1)     |
|         |         |                    | Both   | 1990 | 3,843       | (2,439 to 5,854)  | 2607.2       | (1692.3 to 3850.3)     |
|         |         |                    |        | 2013 | 8,314       | (5,061 to 12,855) | 2765.6       | (1752.0 to 4174.2)     |
|         | YLDs    | Ischemic Stroke    | Male   | 1990 | 15          | (9 to 22)         | 27.3         | (17.2 to 40.6)         |
|         |         |                    |        | 2013 | 28          | (19 to 39)        | 25.3         | (17.0 to 35.2)         |
|         |         |                    | Female | 1990 | 10          | (6 to 14)         | 21.3         | (13.5 to 30.4)         |
|         |         |                    |        | 2013 | 22          | (14 to 33)        | 21.1         | (13.4 to 30.9)         |
|         |         |                    | Both   | 1990 | 25          | (16 to 35)        | 24.6         | (16.4 to 34.3)         |
|         |         |                    |        | 2013 | 51          | (35 to 68)        | 23.3         | (16.0 to 31.2)         |
|         |         | Hemorrhagic Stroke | Male   | 1990 | 20          | (13 to 28)        | 32.2         | (20.9 to 45.2)         |
|         |         |                    |        | 2013 | 38          | (25 to 52)        | 30           | (20.3 to 41.1)         |
|         |         |                    | Female | 1990 | 12          | (8 to 18)         | 22.7         | (14.4 to 32.2)         |
|         |         |                    |        | 2013 | 27          | (18 to 38)        | 22.5         | (15.1 to 31.7)         |
|         |         |                    | Both   | 1990 | 32          | (22 to 45)        | 27.8         | (18.9 to 37.9)         |
|         |         |                    | Both   | 2013 | 65          | (45 to 88)        | 26.3         | (18.2 to 35.7)         |
| Somalia | Deaths  | Ischemic Stroke    | Male   | 1990 | 613         | (200 to 1,174)    | 72.9         | (23.8 to 134.3)        |

|         |         |                    |        |      |             |                     |        |                    |
|---------|---------|--------------------|--------|------|-------------|---------------------|--------|--------------------|
|         |         |                    |        | 2013 | 790         | (232 to 1,441)      | 63     | (19.3 to 110.4)    |
|         |         |                    | Female | 1990 | 870         | (326 to 1,444)      | 89.6   | (34.4 to 143.9)    |
|         |         |                    |        | 2013 | 986         | (413 to 1,544)      | 68.6   | (29.2 to 106.5)    |
|         |         |                    | Both   | 1990 | 1,484       | (646 to 2,494)      | 82.5   | (35.9 to 133.7)    |
|         |         |                    |        | 2013 | 1,776       | (771 to 2,833)      | 66.3   | (29.7 to 103.1)    |
|         | Deaths  | Hemorrhagic Stroke | Male   | 1990 | 942         | (494 to 1,596)      | 85.1   | (40.9 to 148.3)    |
|         |         |                    |        | 2013 | 1,178       | (610 to 2,027)      | 73.7   | (35.0 to 131.0)    |
|         |         |                    | Female | 1990 | 1,343       | (675 to 2,136)      | 110.4  | (57.0 to 173.8)    |
|         |         |                    |        | 2013 | 1,475       | (799 to 2,385)      | 84.1   | (44.6 to 139.7)    |
|         |         |                    | Both   | 1990 | 2,286       | (1,290 to 3,579)    | 99.1   | (56.2 to 153.6)    |
|         |         |                    |        | 2013 | 2,653       | (1,502 to 4,202)    | 79.6   | (44.4 to 127.8)    |
|         | DALYs   | Ischemic Stroke    | Male   | 1990 | 12,351      | (4,080 to 23,939)   | 1113.5 | (368.4 to 2126.0)  |
|         |         |                    |        | 2013 | 15,220      | (4,412 to 28,810)   | 962.3  | (285.1 to 1752.6)  |
|         |         |                    | Female | 1990 | 15,352      | (5,412 to 26,512)   | 1288.2 | (479.5 to 2157.9)  |
|         |         |                    |        | 2013 | 16,648      | (6,720 to 26,883)   | 970.6  | (407.0 to 1527.8)  |
|         |         |                    | Both   | 1990 | 27,703      | (11,729 to 48,309)  | 1213.8 | (529.9 to 2046.3)  |
|         |         |                    |        | 2013 | 31,868      | (13,460 to 52,013)  | 970.3  | (421.9 to 1550.6)  |
|         |         | Hemorrhagic Stroke | Male   | 1990 | 26,211      | (14,625 to 42,692)  | 1760.9 | (923.1 to 2981.3)  |
|         |         |                    |        | 2013 | 30,856      | (17,173 to 51,939)  | 1480.6 | (765.1 to 2545.7)  |
|         |         |                    | Female | 1990 | 33,348      | (15,930 to 52,848)  | 2171.3 | (1068.3 to 3468.7) |
|         |         |                    |        | 2013 | 34,118      | (18,344 to 54,334)  | 1577.6 | (847.0 to 2546.3)  |
|         |         |                    |        |      | Counts, All | Ages                | Rate   | Per 100,000        |
|         |         |                    |        |      |             |                     | Age-   | standardized       |
| Country | measure | Stroke Type        | sex    | year | Mean        | 95% UI              | Mean   | 95% UI             |
|         |         |                    | Both   | 1990 | 59,560      | (33,817 to 91,766)  | 1984   | (1114.1 to 3133.3) |
|         |         |                    |        | 2013 | 64,975      | (36,663 to 103,434) | 1537   | (858.9 to 2445.1)  |

|              |        |                    |        |        |         |                     |                    |                   |                |
|--------------|--------|--------------------|--------|--------|---------|---------------------|--------------------|-------------------|----------------|
|              | YLDs   | Ischemic Stroke    | Male   | 1990   | 153     | (95 to 222)         | 10.4               | (6.6 to 14.8)     |                |
|              |        |                    |        | 2013   | 226     | (141 to 334)        | 10.3               | (6.6 to 15.4)     |                |
|              |        |                    | Female | 1990   | 109     | (70 to 163)         | 6.9                | (4.3 to 10.2)     |                |
|              |        |                    |        | 2013   | 188     | (119 to 278)        | 7.9                | (4.9 to 11.7)     |                |
|              |        |                    | Both   | 1990   | 262     | (173 to 366)        | 8.6                | (5.6 to 11.8)     |                |
|              |        |                    |        | 2013   | 415     | (274 to 591)        | 9                  | (6.0 to 12.8)     |                |
|              |        | Hemorrhagic Stroke | Male   | 1990   | 51      | (30 to 75)          | 2.9                | (1.8 to 4.2)      |                |
|              |        |                    |        | 2013   | 81      | (49 to 124)         | 3                  | (1.8 to 4.5)      |                |
|              |        |                    | Female | 1990   | 31      | (19 to 48)          | 1.8                | (1.1 to 2.7)      |                |
|              |        |                    |        | 2013   | 54      | (33 to 83)          | 1.9                | (1.1 to 2.9)      |                |
|              |        |                    | Both   | 1990   | 83      | (54 to 117)         | 2.3                | (1.5 to 3.2)      |                |
|              |        |                    | Both   | 2013   | 136     | (86 to 193)         | 2.4                | (1.5 to 3.5)      |                |
| South Africa | Deaths | Ischemic Stroke    | Male   | 1990   | 4,008   | (3,108 to 5,245)    | 61.7               | (48.0 to 79.8)    |                |
|              |        |                    |        | 2013   | 5,887   | (4,352 to 7,433)    | 52.9               | (39.6 to 66.8)    |                |
|              |        |                    |        | Female | 1990    | 5,705               | (4,382 to 7,046)   | 61.8              | (47.7 to 76.2) |
|              |        |                    |        |        | 2013    | 11,709              | (8,384 to 14,884)  | 57.1              | (40.8 to 72.7) |
|              |        |                    |        | Both   | 1990    | 9,714               | (8,234 to 11,479)  | 62.4              | (53.0 to 73.3) |
|              |        |                    |        | Both   | 2013    | 17,596              | (13,778 to 20,932) | 56.5              | (44.1 to 67.3) |
|              | Deaths | Hemorrhagic Stroke | Male   | 1990   | 4,923   | (3,785 to 6,373)    | 62.4               | (48.0 to 81.6)    |                |
|              |        |                    |        | 2013   | 6,592   | (4,994 to 8,518)    | 52.6               | (39.9 to 68.1)    |                |
|              |        |                    |        | Female | 1990    | 6,722               | (4,900 to 8,131)   | 66.7              | (49.3 to 81.8) |
|              |        |                    |        |        | 2013    | 10,606              | (8,054 to 14,113)  | 51.4              | (39.0 to 68.2) |
|              |        |                    |        | Both   | 1990    | 11,645              | (9,411 to 13,602)  | 65.4              | (54.0 to 77.4) |
|              |        |                    |        | Both   | 2013    | 17,198              | (14,369 to 20,979) | 52.6              | (43.9 to 64.0) |
|              | DALYs  | Ischemic Stroke    | Male   | 1990   | 79,916  | (59,457 to 106,977) | 991.1              | (761.0 to 1296.0) |                |
|              |        |                    |        | 2013   | 103,722 | (74,943 to          | 796.8              | (587.3 to 999.3)  |                |



|         |         |                    |        |      |             |                      |        |                    |
|---------|---------|--------------------|--------|------|-------------|----------------------|--------|--------------------|
|         |         |                    |        |      |             | 132,785)             |        |                    |
|         |         |                    | Female | 1990 | 89,083      | (64,005 to 114,556)  | 877.3  | (653.5 to 1091.3)  |
|         |         |                    |        | 2013 | 148,093     | (108,790 to 192,189) | 730.9  | (535.2 to 946.9)   |
|         |         |                    | Both   | 1990 | 168,999     | (137,131 to 209,680) | 931.9  | (773.5 to 1118.2)  |
|         |         |                    |        | 2013 | 251,815     | (199,715 to 300,608) | 767.2  | (609.2 to 915.2)   |
|         |         | Hemorrhagic Stroke | Male   | 1990 | 134,423     | (101,872 to 172,904) | 1296.9 | (995.9 to 1682.0)  |
|         |         |                    |        |      |             |                      |        |                    |
|         |         |                    |        |      | Counts, All | Ages                 | Rate   | Per 100,000        |
|         |         |                    |        |      | Mean        | 95% UI               | Age-   | standardized       |
| Country | measure | Stroke Type        | sex    | year | Mean        | 95% UI               | Mean   | 95% UI             |
|         |         |                    |        | 2013 | 145,969     | (110,994 to 188,637) | 950.5  | (721.3 to 1227.5)  |
|         |         |                    | Female | 1990 | 148,448     | (94,333 to 185,280)  | 1274.6 | (859.8 to 1554.1)  |
|         |         |                    |        | 2013 | 166,631     | (127,111 to 226,703) | 794.9  | (606.4 to 1064.1)  |
|         |         |                    | Both   | 1990 | 282,871     | (213,738 to 340,087) | 1288.5 | (1013.4 to 1516.5) |
|         |         |                    |        | 2013 | 312,600     | (259,044 to 378,103) | 868.7  | (723.3 to 1054.5)  |
|         | YLDs    | Ischemic Stroke    | Male   | 1990 | 1,774       | (1,167 to 2,498)     | 18.5   | (11.8 to 26.1)     |
|         |         |                    |        | 2013 | 3,229       | (2,116 to 4,575)     | 20.1   | (13.1 to 28.5)     |
|         |         |                    | Female | 1990 | 2,064       | (1,364 to 2,953)     | 18.2   | (12.0 to 26.1)     |
|         |         |                    |        | 2013 | 3,896       | (2,496 to 5,565)     | 17.8   | (11.2 to 25.6)     |
|         |         |                    | Both   | 1990 | 3,839       | (2,592 to 5,247)     | 18.3   | (12.4 to 25.3)     |
|         |         |                    |        | 2013 | 7,125       | (4,749 to 9,705)     | 18.7   | (12.3 to 25.6)     |

|                  |        |                    |        |         |                      |                      |                    |                    |                  |
|------------------|--------|--------------------|--------|---------|----------------------|----------------------|--------------------|--------------------|------------------|
|                  |        | Hemorrhagic Stroke | Male   | 1990    | 539                  | (336 to 783)         | 4.8                | (3.0 to 7.0)       |                  |
|                  |        |                    |        | 2013    | 958                  | (624 to 1,431)       | 5.3                | (3.4 to 7.8)       |                  |
|                  |        |                    | Female | 1990    | 545                  | (345 to 781)         | 4.4                | (2.8 to 6.3)       |                  |
|                  |        |                    |        | 2013    | 952                  | (597 to 1,406)       | 4.1                | (2.6 to 6.2)       |                  |
|                  |        |                    | Both   | 1990    | 1,084                | (725 to 1,504)       | 4.6                | (3.1 to 6.4)       |                  |
|                  |        |                    | Both   | 2013    | 1,911                | (1,300 to 2,693)     | 4.6                | (3.1 to 6.5)       |                  |
| South Korea      | Deaths | Ischemic Stroke    | Male   | 1990    | 10,153               | (8,441 to 12,708)    | 146.1              | (120.3 to 184.7)   |                  |
|                  |        |                    |        | 2013    | 12,536               | (9,431 to 15,166)    | 60.5               | (45.4 to 73.4)     |                  |
|                  |        |                    |        | Female  | 1990                 | 11,511               | (9,133 to 14,168)  | 96.2               | (77.4 to 118.0)  |
|                  |        |                    |        |         | 2013                 | 17,986               | (13,946 to 23,126) | 47.9               | (37.1 to 61.8)   |
|                  |        |                    |        | Both    | 1990                 | 21,665               | (19,497 to 25,876) | 114.2              | (102.5 to 136.4) |
|                  |        |                    |        |         | 2013                 | 30,523               | (24,705 to 35,731) | 53.2               | (43.1 to 62.2)   |
|                  | Deaths | Hemorrhagic Stroke | Male   | 1990    | 12,674               | (10,148 to 14,993)   | 135.1              | (101.4 to 160.6)   |                  |
| 2013             |        |                    |        | 9,015   | (7,175 to 11,787)    | 37.2                 | (28.9 to 49.9)     |                    |                  |
|                  |        |                    | Female | 1990    | 14,705               | (10,445 to 16,484)   | 109.4              | (77.6 to 123.9)    |                  |
|                  |        |                    |        | 2013    | 10,823               | (8,095 to 17,287)    | 29.7               | (22.3 to 47.2)     |                  |
|                  |        |                    | Both   | 1990    | 27,380               | (22,172 to 30,450)   | 120.4              | (94.5 to 135.5)    |                  |
|                  |        |                    |        | 2013    | 19,839               | (16,072 to 27,053)   | 33.4               | (26.9 to 46.1)     |                  |
|                  | DALYs  | Ischemic Stroke    | Male   | 1990    | 201,716              | (169,165 to 252,135) | 2205               | (1843.6 to 2734.6) |                  |
| 2013             |        |                    |        | 189,485 | (146,845 to 228,305) | 784.2                | (612.7 to 939.4)   |                    |                  |
|                  |        |                    | Female | 1990    | 173,681              | (133,257 to 215,390) | 1280.2             | (1006.1 to 1577.7) |                  |
|                  |        |                    |        | 2013    | 178,914              | (140,061 to 229,721) | 488.4              | (381.8 to 629.9)   |                  |
| Counts, All Ages |        |                    |        |         |                      |                      | Rate               | Per 100,000        |                  |
|                  |        |                    |        |         |                      |                      | Age-               | standardized       |                  |

| Country | measure | Stroke Type        | sex    | year | Mean    | 95% UI               | Mean   | 95% UI             |
|---------|---------|--------------------|--------|------|---------|----------------------|--------|--------------------|
|         |         |                    | Both   | 1990 | 375,397 | (329,239 to 446,576) | 1636.6 | (1461.0 to 1941.3) |
|         |         |                    |        | 2013 | 368,400 | (299,275 to 426,518) | 614.9  | (499.5 to 710.9)   |
|         |         | Hemorrhagic Stroke | Male   | 1990 | 339,447 | (283,382 to 415,491) | 2644.6 | (2114.6 to 3124.2) |
|         |         |                    |        | 2013 | 192,666 | (157,661 to 235,196) | 685.2  | (559.2 to 844.3)   |
|         |         |                    | Female | 1990 | 301,182 | (219,259 to 332,145) | 1917.3 | (1409.8 to 2123.3) |
|         |         |                    |        | 2013 | 149,553 | (117,865 to 229,783) | 430.6  | (340.9 to 662.0)   |
|         |         |                    | Both   | 1990 | 640,630 | (543,898 to 707,692) | 2238.3 | (1848.7 to 2479.9) |
|         |         |                    |        | 2013 | 342,219 | (294,211 to 431,821) | 551.6  | (473.6 to 697.1)   |
|         | YLDs    | Ischemic Stroke    | Male   | 1990 | 9,754   | (6,375 to 13,628)    | 94     | (60.6 to 131.9)    |
|         |         |                    |        | 2013 | 29,297  | (19,675 to 40,648)   | 109    | (72.3 to 151.9)    |
|         |         |                    | Female | 1990 | 8,666   | (5,647 to 11,937)    | 59.5   | (38.6 to 82.0)     |
|         |         |                    |        | 2013 | 23,246  | (15,768 to 32,594)   | 66.1   | (44.8 to 92.6)     |
|         |         |                    | Both   | 1990 | 18,420  | (12,523 to 24,786)   | 73.1   | (49.4 to 98.7)     |
|         |         |                    |        | 2013 | 52,543  | (36,002 to 72,169)   | 85.1   | (58.2 to 116.9)    |
|         |         | Hemorrhagic Stroke | Male   | 1990 | 3,505   | (2,167 to 5,053)     | 28.8   | (18.1 to 42.7)     |
|         |         |                    |        | 2013 | 10,034  | (6,464 to 14,360)    | 36.6   | (23.4 to 51.8)     |
|         |         |                    | Female | 1990 | 3,329   | (2,151 to 4,819)     | 20.5   | (13.2 to 29.9)     |
|         |         |                    |        | 2013 | 9,228   | (5,877 to 12,960)    | 27     | (17.1 to 37.9)     |
|         |         |                    | Both   | 1990 | 6,835   | (4,489 to 9,632)     | 23.7   | (15.6 to 33.6)     |
|         |         |                    | Both   | 2013 | 19,263  | (12,629 to 26,640)   | 31.1   | (20.5 to 43.0)     |

|                  |         |                    |        |      |        |                    |                    |                    |
|------------------|---------|--------------------|--------|------|--------|--------------------|--------------------|--------------------|
| South Sudan      | Deaths  | Ischemic Stroke    | Male   | 1990 | 665    | (284 to 1,086)     | 94.9               | (41.9 to 150.8)    |
|                  |         |                    |        |      |        | 2013               | 1,489              | (807 to 2,125)     |
|                  |         |                    | Female | 1990 | 546    | (279 to 859)       | 78.6               | (41.1 to 118.4)    |
|                  |         |                    |        | 2013 | 1,251  | (793 to 1,796)     | 70.5               | (44.3 to 99.5)     |
|                  |         |                    | Both   | 1990 | 1,211  | (666 to 1,774)     | 86.4               | (48.8 to 122.4)    |
|                  |         |                    |        | 2013 | 2,741  | (1,835 to 3,551)   | 79.9               | (54.1 to 102.9)    |
|                  | Deaths  | Hemorrhagic Stroke | Male   | 1990 | 988    | (601 to 1,506)     | 99.6               | (59.6 to 152.6)    |
|                  |         |                    |        |      |        | 2013               | 1,857              | (1,224 to 2,603)   |
|                  |         |                    | Female | 1990 | 772    | (445 to 1,201)     | 80.4               | (48.3 to 121.8)    |
|                  |         |                    |        | 2013 | 1,439  | (985 to 2,091)     | 67.5               | (44.2 to 98.7)     |
|                  |         |                    | Both   | 1990 | 1,760  | (1,212 to 2,439)   | 89.8               | (61.3 to 123.8)    |
|                  |         |                    |        | 2013 | 3,296  | (2,487 to 4,354)   | 78.3               | (56.9 to 107.0)    |
|                  | DALYs   | Ischemic Stroke    | Male   | 1990 | 14,616 | (6,484 to 23,757)  | 1505.3             | (656.2 to 2432.0)  |
|                  |         |                    |        |      |        | 2013               | 28,776             | (15,146 to 41,157) |
| Counts, All Ages |         |                    |        |      |        |                    |                    |                    |
|                  |         |                    |        |      |        |                    | Rate               | Per 100,000        |
|                  |         |                    |        |      |        |                    | Age-               | standardized       |
| Country          | measure | Stroke Type        | sex    | year | Mean   | 95% UI             | Mean               | 95% UI             |
|                  |         |                    | Female | 1990 | 9,981  | (4,958 to 15,974)  | 1063.2             | (547.6 to 1665.8)  |
|                  |         |                    |        | 2013 | 20,085 | (12,681 to 29,211) | 943.3              | (605.3 to 1361.7)  |
|                  |         |                    | Both   | 1990 | 24,597 | (13,288 to 36,794) | 1274.3             | (710.4 to 1847.2)  |
|                  |         |                    |        | 2013 | 48,861 | (31,398 to 64,243) | 1165.6             | (774.4 to 1511.7)  |
|                  |         | Hemorrhagic Stroke | Male   | 1990 | 29,155 | (18,306 to 43,631) | 2132.5             | (1287.6 to 3242.0) |
|                  |         |                    |        |      | 2013   | 48,766             | (32,984 to 66,869) | 1867.2             |
|                  |         |                    | Female | 1990 | 19,935 | (11,392 to 31,120) | 1490               | (853.6 to 2317.7)  |
|                  |         |                    |        | 2013 | 32,185 | (22,824 to 46,014) | 1215.3             | (845.2 to 1759.7)  |
|                  |         |                    | Both   | 1990 | 49,090 | (34,089 to 67,878) | 1801.7             | (1237.4 to 2497.9) |
|                  |         |                    |        | 2013 | 80,951 | (63,153 to         | 1529.4             | (1164.2 to 2003.9) |

|       |        |                    |        |      |         |                      |       |                  |
|-------|--------|--------------------|--------|------|---------|----------------------|-------|------------------|
|       |        |                    |        |      |         | 104,161)             |       |                  |
|       | YLDs   | Ischemic Stroke    | Male   | 1990 | 128     | (80 to 198)          | 9.5   | (6.1 to 14.5)    |
|       |        |                    |        | 2013 | 274     | (170 to 402)         | 10.1  | (6.3 to 14.7)    |
|       |        |                    | Female | 1990 | 98      | (60 to 144)          | 7     | (4.3 to 10.1)    |
|       |        |                    |        | 2013 | 214     | (134 to 308)         | 7.3   | (4.7 to 10.6)    |
|       |        |                    | Both   | 1990 | 226     | (149 to 331)         | 8.2   | (5.6 to 11.8)    |
|       |        |                    |        | 2013 | 488     | (321 to 687)         | 8.7   | (5.9 to 12.0)    |
|       |        | Hemorrhagic Stroke | Male   | 1990 | 42      | (27 to 63)           | 2.7   | (1.7 to 3.9)     |
|       |        |                    |        | 2013 | 91      | (53 to 138)          | 2.8   | (1.6 to 4.2)     |
|       |        |                    | Female | 1990 | 29      | (17 to 42)           | 1.8   | (1.1 to 2.7)     |
|       |        |                    |        | 2013 | 62      | (39 to 93)           | 1.8   | (1.2 to 2.7)     |
|       |        |                    | Both   | 1990 | 72      | (47 to 103)          | 2.2   | (1.5 to 3.2)     |
|       |        |                    | Both   | 2013 | 154     | (97 to 222)          | 2.3   | (1.5 to 3.3)     |
| Spain | Deaths | Ischemic Stroke    | Male   | 1990 | 11,478  | (9,220 to 13,527)    | 58.7  | (47.1 to 69.3)   |
|       |        |                    |        | 2013 | 9,441   | (7,226 to 12,394)    | 23.7  | (18.3 to 31.2)   |
|       |        |                    | Female | 1990 | 18,957  | (13,761 to 21,415)   | 56.5  | (41.1 to 63.8)   |
|       |        |                    |        | 2013 | 15,735  | (12,030 to 24,658)   | 23.5  | (18.2 to 36.9)   |
|       |        |                    | Both   | 1990 | 30,435  | (24,421 to 33,959)   | 58    | (46.5 to 64.7)   |
|       |        |                    |        | 2013 | 25,176  | (20,607 to 34,968)   | 23.9  | (19.6 to 33.0)   |
|       | Deaths | Hemorrhagic Stroke | Male   | 1990 | 6,684   | (5,364 to 8,482)     | 32.9  | (26.3 to 42.1)   |
|       |        |                    |        | 2013 | 7,879   | (4,916 to 9,895)     | 21.1  | (13.4 to 26.2)   |
|       |        |                    | Female | 1990 | 8,682   | (6,639 to 11,239)    | 27.9  | (21.4 to 35.6)   |
|       |        |                    |        | 2013 | 9,801   | (6,747 to 13,759)    | 16.7  | (11.9 to 23.0)   |
|       |        |                    | Both   | 1990 | 15,366  | (13,144 to 18,923)   | 30.4  | (26.1 to 37.1)   |
|       |        |                    |        | 2013 | 17,681  | (12,948 to 21,555)   | 18.7  | (14.1 to 22.5)   |
|       | DALYs  | Ischemic Stroke    | Male   | 1990 | 160,713 | (132,186 to 185,872) | 780.2 | (645.7 to 907.1) |

|                  |         |                    |        | 2013 | 119,825 | (97,989 to 149,897)  | 331                          | (270.9 to 409.6)            |
|------------------|---------|--------------------|--------|------|---------|----------------------|------------------------------|-----------------------------|
| Counts, All Ages |         |                    |        |      |         |                      |                              |                             |
| Country          | measure | Stroke Type        | sex    | year | Mean    | 95% UI               | Rate<br>Age-<br>standardized | Per 100,000<br>standardized |
|                  |         |                    |        |      | Mean    | 95% UI               | Mean                         | 95% UI                      |
|                  |         |                    | Female | 1990 | 198,301 | (151,167 to 220,096) | 626.3                        | (479.3 to 695.3)            |
|                  |         |                    |        | 2013 | 139,354 | (110,256 to 204,269) | 253.8                        | (200.0 to 367.0)            |
|                  |         |                    | Both   | 1990 | 359,015 | (301,246 to 397,322) | 696.4                        | (585.5 to 771.1)            |
|                  |         |                    |        | 2013 | 259,179 | (217,480 to 336,618) | 289.7                        | (243.4 to 372.2)            |
|                  |         | Hemorrhagic Stroke | Male   | 1990 | 132,066 | (109,000 to 162,742) | 639.1                        | (528.1 to 787.1)            |
|                  |         |                    |        | 2013 | 115,848 | (80,853 to 140,244)  | 347.4                        | (245.0 to 417.7)            |
|                  |         |                    | Female | 1990 | 123,727 | (97,350 to 153,511)  | 460.2                        | (364.7 to 569.5)            |
|                  |         |                    |        | 2013 | 102,972 | (77,458 to 136,426)  | 233.9                        | (182.3 to 305.5)            |
|                  |         |                    | Both   | 1990 | 255,794 | (228,086 to 301,160) | 544.9                        | (486.0 to 636.5)            |
|                  |         |                    |        | 2013 | 218,820 | (173,863 to 252,414) | 286.8                        | (231.1 to 329.0)            |
|                  | YLDs    | Ischemic Stroke    | Male   | 1990 | 17,132  | (11,547 to 23,353)   | 80.3                         | (54.2 to 109.7)             |
|                  |         |                    |        | 2013 | 27,805  | (18,938 to 39,599)   | 82.4                         | (56.0 to 117.6)             |
|                  |         |                    | Female | 1990 | 20,339  | (13,965 to 27,823)   | 69.8                         | (47.9 to 95.3)              |
|                  |         |                    |        | 2013 | 26,109  | (17,045 to 36,201)   | 60.4                         | (39.9 to 83.4)              |
|                  |         |                    | Both   | 1990 | 37,472  | (25,970 to 49,546)   | 74.7                         | (51.8 to 98.8)              |

|                  |         |                    |        |      |        |                    |       |                   |
|------------------|---------|--------------------|--------|------|--------|--------------------|-------|-------------------|
|                  |         |                    |        | 2013 | 53,915 | (36,733 to 74,274) | 70.4  | (47.9 to 97.3)    |
|                  |         | Hemorrhagic Stroke | Male   | 1990 | 3,350  | (1,951 to 5,160)   | 16    | (9.4 to 24.6)     |
|                  |         |                    |        | 2013 | 6,428  | (4,018 to 9,047)   | 19.5  | (12.3 to 27.5)    |
|                  |         |                    | Female | 1990 | 4,179  | (2,470 to 6,226)   | 15.5  | (9.4 to 23.2)     |
|                  |         |                    |        | 2013 | 5,466  | (3,123 to 8,524)   | 14.4  | (8.6 to 21.6)     |
|                  |         |                    | Both   | 1990 | 7,530  | (4,735 to 10,765)  | 15.6  | (9.8 to 22.1)     |
|                  |         |                    | Both   | 2013 | 11,895 | (7,676 to 16,394)  | 16.6  | (10.8 to 22.8)    |
| Sri Lanka        | Deaths  | Ischemic Stroke    | Male   | 1990 | 2,296  | (1,882 to 2,855)   | 49.3  | (40.1 to 62.4)    |
|                  |         |                    |        | 2013 | 4,397  | (2,692 to 5,862)   | 58.8  | (36.0 to 78.3)    |
|                  |         |                    | Female | 1990 | 1,610  | (1,223 to 1,984)   | 37.5  | (28.4 to 46.0)    |
|                  |         |                    |        | 2013 | 4,646  | (1,513 to 6,615)   | 53    | (17.0 to 75.7)    |
|                  |         |                    | Both   | 1990 | 3,906  | (3,402 to 4,598)   | 43.4  | (37.4 to 50.9)    |
|                  |         |                    |        | 2013 | 9,043  | (4,657 to 11,762)  | 55.8  | (28.2 to 73.1)    |
|                  | Deaths  | Hemorrhagic Stroke | Male   | 1990 | 1,577  | (1,281 to 2,092)   | 28.8  | (23.1 to 39.0)    |
|                  |         |                    |        | 2013 | 1,854  | (1,240 to 3,351)   | 20.9  | (13.6 to 40.2)    |
|                  |         |                    | Female | 1990 | 1,026  | (842 to 1,432)     | 20.2  | (16.1 to 29.1)    |
|                  |         |                    |        | 2013 | 1,440  | (856 to 2,414)     | 14.6  | (8.6 to 25.2)     |
| Counts, All Ages |         |                    |        |      |        |                    |       |                   |
|                  |         |                    |        |      |        |                    | Rate  | Per 100,000       |
|                  |         |                    |        |      |        |                    | Age-  | standardized      |
| Country          | measure | Stroke Type        | sex    | year | Mean   | 95% UI             | Mean  | 95% UI            |
|                  |         |                    | Both   | 1990 | 2,603  | (2,252 to 3,327)   | 24.5  | (20.9 to 31.9)    |
|                  |         |                    |        | 2013 | 3,294  | (2,407 to 5,500)   | 17.6  | (12.5 to 30.6)    |
|                  | DALYs   | Ischemic Stroke    | Male   | 1990 | 47,726 | (39,423 to 57,233) | 860.1 | (711.8 to 1038.1) |
|                  |         |                    |        | 2013 | 76,038 | (48,047 to 99,657) | 884.9 | (558.1 to 1165.8) |
|                  |         |                    | Female | 1990 | 28,349 | (21,798 to 34,890) | 541.3 | (419.6 to 660.9)  |
|                  |         |                    |        | 2013 | 60,575 | (24,113 to 84,503) | 621.3 | (240.9 to 867.8)  |
|                  |         |                    | Both   | 1990 | 76,076 | (66,742 to 88,686) | 701.5 | (617.5 to 821.7)  |

|       |        |                    |        |      |         |                     |       |                  |
|-------|--------|--------------------|--------|------|---------|---------------------|-------|------------------|
|       |        |                    |        | 2013 | 136,614 | (76,831 to 175,337) | 743.8 | (412.7 to 952.9) |
|       |        | Hemorrhagic Stroke | Male   | 1990 | 49,946  | (41,255 to 63,477)  | 739.3 | (607.9 to 945.8) |
|       |        |                    |        | 2013 | 50,634  | (36,422 to 76,858)  | 508.9 | (362.7 to 806.8) |
|       |        |                    | Female | 1990 | 30,638  | (25,305 to 39,028)  | 460.2 | (389.3 to 610.8) |
|       |        |                    |        | 2013 | 32,352  | (21,545 to 45,067)  | 297.1 | (199.4 to 422.9) |
|       |        |                    | Both   | 1990 | 80,585  | (71,029 to 97,361)  | 600.4 | (526.8 to 735.7) |
|       |        |                    |        | 2013 | 82,986  | (64,792 to 116,855) | 397.3 | (310.6 to 582.9) |
|       | YLDs   | Ischemic Stroke    | Male   | 1990 | 1,516   | (991 to 2,175)      | 29.5  | (19.3 to 42.1)   |
|       |        |                    |        | 2013 | 2,562   | (1,652 to 3,661)    | 29.4  | (19.0 to 41.6)   |
|       |        |                    | Female | 1990 | 1,249   | (817 to 1,785)      | 24.7  | (16.1 to 35.2)   |
|       |        |                    |        | 2013 | 2,673   | (1,679 to 3,840)    | 26    | (16.1 to 37.6)   |
|       |        |                    | Both   | 1990 | 2,766   | (1,881 to 3,813)    | 27.1  | (18.5 to 37.1)   |
|       |        |                    |        | 2013 | 5,236   | (3,433 to 7,264)    | 27.6  | (18.0 to 38.2)   |
|       |        | Hemorrhagic Stroke | Male   | 1990 | 1,719   | (1,139 to 2,413)    | 31.3  | (20.6 to 44.1)   |
|       |        |                    |        | 2013 | 2,874   | (1,877 to 4,020)    | 31.5  | (20.5 to 44.2)   |
|       |        |                    | Female | 1990 | 1,289   | (828 to 1,810)      | 23.9  | (15.4 to 33.6)   |
|       |        |                    |        | 2013 | 2,545   | (1,643 to 3,540)    | 24.2  | (15.5 to 34.0)   |
|       |        |                    | Both   | 1990 | 3,008   | (2,024 to 4,093)    | 27.6  | (18.5 to 37.4)   |
|       |        |                    | Both   | 2013 | 5,420   | (3,641 to 7,384)    | 27.6  | (18.4 to 37.5)   |
| Sudan | Deaths | Ischemic Stroke    | Male   | 1990 | 2,300   | (1,097 to 3,444)    | 88.9  | (43.4 to 123.9)  |
|       |        |                    |        | 2013 | 4,340   | (2,383 to 6,287)    | 83.4  | (47.8 to 114.6)  |
|       |        |                    | Female | 1990 | 2,678   | (1,492 to 3,896)    | 90.5  | (51.2 to 127.3)  |
|       |        |                    |        | 2013 | 4,735   | (2,870 to 6,746)    | 81.1  | (49.4 to 112.1)  |
|       |        |                    | Both   | 1990 | 4,979   | (3,259 to 6,559)    | 89.8  | (57.4 to 113.6)  |
|       |        |                    |        | 2013 | 9,076   | (6,004 to 11,545)   | 82.2  | (54.4 to 102.6)  |



|         |         |                    |        |      |             |                      |        |                    |
|---------|---------|--------------------|--------|------|-------------|----------------------|--------|--------------------|
|         | Deaths  | Hemorrhagic Stroke | Male   | 1990 | 3,210       | (2,171 to 4,613)     | 87.4   | (59.5 to 128.4)    |
|         |         |                    |        | 2013 | 4,930       | (3,399 to 6,806)     | 70.7   | (49.0 to 98.4)     |
|         |         |                    | Female | 1990 | 4,028       | (2,412 to 5,616)     | 101.2  | (63.9 to 146.8)    |
|         |         |                    |        | 2013 | 5,434       | (3,601 to 7,998)     | 73.9   | (48.8 to 107.8)    |
|         |         |                    | Both   | 1990 | 7,238       | (5,265 to 9,506)     | 94.8   | (69.9 to 126.5)    |
|         |         |                    |        | 2013 | 10,364      | (7,820 to 13,717)    | 72.5   | (55.2 to 96.6)     |
|         |         |                    |        |      | Counts, All | Ages                 | Rate   | Per 100,000        |
|         |         |                    |        |      |             |                      | Age-   | standardized       |
| Country | measure | Stroke Type        | sex    | year | Mean        | 95% UI               | Mean   | 95% UI             |
|         | DALYs   | Ischemic Stroke    | Male   | 1990 | 50,666      | (23,358 to 85,424)   | 1364.3 | (645.3 to 2040.9)  |
|         |         |                    |        | 2013 | 82,432      | (43,060 to 130,262)  | 1191.7 | (645.4 to 1751.4)  |
|         |         |                    | Female | 1990 | 55,911      | (27,353 to 97,305)   | 1370.9 | (767.3 to 2037.7)  |
|         |         |                    |        | 2013 | 80,918      | (46,148 to 121,435)  | 1098.1 | (662.7 to 1588.3)  |
|         |         |                    | Both   | 1990 | 106,578     | (63,512 to 154,063)  | 1367.8 | (893.8 to 1818.8)  |
|         |         |                    |        | 2013 | 163,351     | (103,077 to 219,080) | 1143.2 | (752.3 to 1474.7)  |
|         |         | Hemorrhagic Stroke | Male   | 1990 | 115,652     | (77,259 to 165,519)  | 1902.4 | (1287.6 to 2724.5) |
|         |         |                    |        | 2013 | 150,264     | (103,327 to 211,357) | 1421.5 | (974.4 to 1983.2)  |
|         |         |                    | Female | 1990 | 138,105     | (70,573 to 196,607)  | 2196.9 | (1319.6 to 3109.8) |
|         |         |                    |        | 2013 | 148,126     | (96,417 to 219,014)  | 1402.2 | (926.5 to 2068.7)  |
|         |         |                    | Both   | 1990 | 253,757     | (177,828 to 332,413) | 2054.5 | (1494.5 to 2695.1) |
|         |         |                    |        | 2013 | 298,390     | (224,074 to          | 1413.3 | (1056.7 to 1887.4) |

|                  |         |                    |        |      |       |                  |                              |                             |
|------------------|---------|--------------------|--------|------|-------|------------------|------------------------------|-----------------------------|
|                  |         |                    |        |      |       | 390,087)         |                              |                             |
|                  | YLDs    | Ischemic Stroke    | Male   | 1990 | 402   | (265 to 584)     | 9.5                          | (6.2 to 13.8)               |
|                  |         |                    |        | 2013 | 860   | (542 to 1,222)   | 9.7                          | (6.0 to 13.9)               |
|                  |         |                    | Female | 1990 | 344   | (218 to 505)     | 7.8                          | (5.0 to 11.4)               |
|                  |         |                    |        | 2013 | 673   | (417 to 990)     | 7.2                          | (4.5 to 10.6)               |
|                  |         |                    | Both   | 1990 | 747   | (491 to 1,036)   | 8.6                          | (5.7 to 12.1)               |
|                  |         |                    |        | 2013 | 1,533 | (1,002 to 2,158) | 8.4                          | (5.5 to 11.8)               |
|                  |         | Hemorrhagic Stroke | Male   | 1990 | 65    | (39 to 102)      | 1.3                          | (0.7 to 2.0)                |
|                  |         |                    |        | 2013 | 141   | (83 to 221)      | 1.4                          | (0.8 to 2.1)                |
|                  |         |                    | Female | 1990 | 66    | (35 to 107)      | 1.3                          | (0.7 to 2.1)                |
|                  |         |                    |        | 2013 | 135   | (70 to 220)      | 1.3                          | (0.6 to 2.1)                |
|                  |         |                    | Both   | 1990 | 131   | (83 to 194)      | 1.3                          | (0.8 to 2.0)                |
|                  |         |                    | Both   | 2013 | 276   | (170 to 410)     | 1.3                          | (0.8 to 1.9)                |
| Suriname         | Deaths  | Ischemic Stroke    | Male   | 1990 | 85    | (71 to 102)      | 95.5                         | (79.1 to 115.3)             |
|                  |         |                    |        | 2013 | 158   | (114 to 208)     | 102.1                        | (75.3 to 131.8)             |
|                  |         |                    | Female | 1990 | 94    | (81 to 119)      | 89.8                         | (77.6 to 114.4)             |
|                  |         |                    |        | 2013 | 190   | (140 to 243)     | 93.1                         | (68.5 to 119.1)             |
|                  |         |                    | Both   | 1990 | 180   | (160 to 212)     | 92.9                         | (82.9 to 110.4)             |
|                  |         |                    |        | 2013 | 348   | (278 to 423)     | 98                           | (78.8 to 118.2)             |
|                  | Deaths  | Hemorrhagic Stroke | Male   | 1990 | 52    | (42 to 69)       | 48.9                         | (39.4 to 65.4)              |
|                  |         |                    |        | 2013 | 95    | (61 to 131)      | 53.1                         | (33.3 to 72.3)              |
| Counts, All Ages |         |                    |        |      |       |                  |                              |                             |
| Country          | measure | Stroke Type        | sex    | year | Mean  | 95% UI           | Rate<br>Age-<br>standardized | Per 100,000<br>standardized |
|                  |         |                    | Female | 1990 | 57    | (48 to 77)       | 48.3                         | (39.9 to 66.7)              |
|                  |         |                    |        | 2013 | 111   | (70 to 152)      | 52.2                         | (32.6 to 71.1)              |
|                  |         |                    | Both   | 1990 | 109   | (95 to 139)      | 48.8                         | (42.2 to 63.6)              |

|           |        |                    |        |      |       |                  |        |                    |
|-----------|--------|--------------------|--------|------|-------|------------------|--------|--------------------|
|           |        |                    |        | 2013 | 207   | (146 to 264)     | 53.2   | (36.7 to 67.5)     |
|           | DALYs  | Ischemic Stroke    | Male   | 1990 | 1,770 | (1,472 to 2,105) | 1634.5 | (1376.0 to 1942.1) |
|           |        |                    |        | 2013 | 3,064 | (2,174 to 4,072) | 1687.9 | (1209.2 to 2231.4) |
|           |        |                    | Female | 1990 | 1,600 | (1,367 to 1,976) | 1366.8 | (1183.2 to 1703.4) |
|           |        |                    |        | 2013 | 2,821 | (2,038 to 3,697) | 1304.8 | (946.9 to 1701.2)  |
|           |        |                    | Both   | 1990 | 3,371 | (2,995 to 3,885) | 1497.9 | (1341.5 to 1737.3) |
|           |        |                    |        | 2013 | 5,885 | (4,630 to 7,246) | 1487.9 | (1178.1 to 1819.0) |
|           |        | Hemorrhagic Stroke | Male   | 1990 | 1,511 | (1,229 to 1,943) | 1127.6 | (918.6 to 1462.9)  |
|           |        |                    |        | 2013 | 2,512 | (1,634 to 3,476) | 1159.9 | (756.0 to 1590.5)  |
|           |        |                    | Female | 1990 | 1,469 | (1,252 to 1,898) | 1046.4 | (890.7 to 1375.9)  |
|           |        |                    |        | 2013 | 2,295 | (1,528 to 3,102) | 984.1  | (647.6 to 1326.9)  |
|           |        |                    | Both   | 1990 | 2,981 | (2,642 to 3,624) | 1086.9 | (958.9 to 1345.2)  |
|           |        |                    |        | 2013 | 4,808 | (3,562 to 6,139) | 1074.1 | (781.7 to 1367.2)  |
|           | YLDs   | Ischemic Stroke    | Male   | 1990 | 47    | (31 to 66)       | 46.7   | (30.9 to 64.7)     |
|           |        |                    |        | 2013 | 83    | (54 to 118)      | 47     | (30.4 to 65.8)     |
|           |        |                    | Female | 1990 | 37    | (24 to 53)       | 32.7   | (21.4 to 46.5)     |
|           |        |                    |        | 2013 | 72    | (45 to 105)      | 32.9   | (20.4 to 48.2)     |
|           |        |                    | Both   | 1990 | 85    | (58 to 116)      | 39.2   | (26.8 to 53.5)     |
|           |        |                    |        | 2013 | 155   | (104 to 217)     | 39.1   | (26.4 to 54.4)     |
|           |        | Hemorrhagic Stroke | Male   | 1990 | 16    | (10 to 26)       | 14.5   | (8.7 to 22.6)      |
|           |        |                    |        | 2013 | 28    | (17 to 43)       | 14.2   | (8.3 to 21.9)      |
|           |        |                    | Female | 1990 | 12    | (8 to 18)        | 10     | (6.4 to 14.6)      |
|           |        |                    |        | 2013 | 24    | (15 to 37)       | 10.7   | (6.6 to 16.0)      |
|           |        |                    | Both   | 1990 | 29    | (19 to 41)       | 12.1   | (8.0 to 17.3)      |
|           |        |                    | Both   | 2013 | 53    | (34 to 76)       | 12.3   | (7.9 to 17.6)      |
| Swaziland | Deaths | Ischemic Stroke    | Male   | 1990 | 53    | (34 to 73)       | 58.2   | (38.1 to 78.6)     |
|           |        |                    |        | 2013 | 141   | (94 to 191)      | 80.2   | (55.1 to 105.7)    |

|         |         |                    | Female | 1990 | 82               | (53 to 110)       | 69               | (45.2 to 92.9)     |
|---------|---------|--------------------|--------|------|------------------|-------------------|------------------|--------------------|
|         |         |                    |        | 2013 | 181              | (127 to 250)      | 81.2             | (57.2 to 110.1)    |
|         |         |                    | Both   | 1990 | 136              | (97 to 170)       | 65.1             | (47.5 to 81.6)     |
|         |         |                    |        | 2013 | 323              | (247 to 411)      | 81.5             | (62.8 to 102.3)    |
|         | Deaths  | Hemorrhagic Stroke | Male   | 1990 | 83               | (59 to 109)       | 73.1             | (51.4 to 97.1)     |
|         |         |                    |        | 2013 | 176              | (126 to 236)      | 79.2             | (57.6 to 107.6)    |
|         |         |                    | Female | 1990 | 114              | (77 to 144)       | 80.6             | (52.4 to 102.3)    |
|         |         |                    |        | 2013 | 191              | (136 to 273)      | 69.5             | (48.6 to 99.0)     |
|         |         |                    | Both   | 1990 | 197              | (151 to 239)      | 77.9             | (58.3 to 94.5)     |
|         |         |                    |        |      | Counts, All Ages |                   | Rate Per 100,000 |                    |
|         |         |                    |        |      |                  |                   | Age-standardized |                    |
| Country | measure | Stroke Type        | sex    | year | Mean             | 95% UI            | Mean             | 95% UI             |
|         |         |                    |        | 2013 | 367              | (290 to 479)      | 74               | (58.3 to 97.4)     |
|         | DALYs   | Ischemic Stroke    | Male   | 1990 | 1,144            | (707 to 1,578)    | 940.3            | (604.0 to 1286.2)  |
|         |         |                    |        | 2013 | 3,025            | (1,884 to 4,389)  | 1362.4           | (892.2 to 1877.7)  |
|         |         |                    | Female | 1990 | 1,491            | (912 to 2,024)    | 1006.2           | (643.6 to 1345.0)  |
|         |         |                    |        | 2013 | 3,144            | (2,181 to 4,464)  | 1156.4           | (812.5 to 1595.2)  |
|         |         |                    | Both   | 1990 | 2,636            | (1,806 to 3,315)  | 984.2            | (698.1 to 1228.2)  |
|         |         |                    |        | 2013 | 6,169            | (4,617 to 8,027)  | 1251.6           | (959.5 to 1594.2)  |
|         |         | Hemorrhagic Stroke | Male   | 1990 | 2,257            | (1,599 to 2,927)  | 1429.4           | (1021.2 to 1871.9) |
|         |         |                    |        | 2013 | 5,256            | (3,834 to 6,920)  | 1768.7           | (1265.9 to 2367.1) |
|         |         |                    | Female | 1990 | 2,725            | (1,931 to 3,421)  | 1455.1           | (1003.6 to 1841.5) |
|         |         |                    |        | 2013 | 5,162            | (3,721 to 7,718)  | 1408.5           | (1003.7 to 2035.2) |
|         |         |                    | Both   | 1990 | 4,983            | (3,868 to 5,998)  | 1448.6           | (1112.2 to 1754.2) |
|         |         |                    |        | 2013 | 10,419           | (8,247 to 13,508) | 1567.9           | (1234.5 to 2049.6) |
|         | YLDs    | Ischemic Stroke    | Male   | 1990 | 29               | (19 to 41)        | 19.3             | (12.7 to 27.1)     |
|         |         |                    |        | 2013 | 46               | (29 to 69)        | 17.6             | (10.7 to 26.2)     |

|         |         |                    |        |      |                  |                    |       |                  |
|---------|---------|--------------------|--------|------|------------------|--------------------|-------|------------------|
|         |         |                    | Female | 1990 | 34               | (22 to 49)         | 17.8  | (11.6 to 25.3)   |
|         |         |                    |        | 2013 | 58               | (38 to 83)         | 18.1  | (11.5 to 25.8)   |
|         |         |                    | Both   | 1990 | 64               | (43 to 89)         | 18.5  | (12.5 to 25.4)   |
|         |         |                    |        | 2013 | 105              | (69 to 147)        | 17.9  | (11.8 to 25.0)   |
|         |         | Hemorrhagic Stroke | Male   | 1990 | 9                | (5 to 13)          | 5.1   | (3.1 to 7.5)     |
|         |         |                    |        | 2013 | 14               | (9 to 22)          | 4.7   | (2.9 to 7.1)     |
|         |         |                    | Female | 1990 | 9                | (6 to 14)          | 4.4   | (2.7 to 6.3)     |
|         |         |                    |        | 2013 | 15               | (9 to 23)          | 4.3   | (2.6 to 6.4)     |
|         |         |                    | Both   | 1990 | 19               | (12 to 26)         | 4.7   | (3.0 to 6.6)     |
|         |         |                    | Both   | 2013 | 30               | (20 to 42)         | 4.5   | (3.0 to 6.3)     |
| Sweden  | Deaths  | Ischemic Stroke    | Male   | 1990 | 2,923            | (2,356 to 3,741)   | 47.9  | (38.4 to 61.6)   |
|         |         |                    |        | 2013 | 2,508            | (1,808 to 3,179)   | 30.3  | (21.9 to 38.3)   |
|         |         |                    | Female | 1990 | 4,037            | (3,245 to 4,965)   | 40.2  | (32.2 to 49.4)   |
|         |         |                    |        | 2013 | 3,592            | (2,691 to 4,674)   | 27.6  | (21.1 to 36.0)   |
|         |         |                    | Both   | 1990 | 6,960            | (6,073 to 8,141)   | 43.7  | (38.2 to 51.2)   |
|         |         |                    |        | 2013 | 6,100            | (4,865 to 7,271)   | 29    | (23.2 to 34.5)   |
|         | Deaths  | Hemorrhagic Stroke | Male   | 1990 | 1,711            | (1,283 to 2,220)   | 28.8  | (21.6 to 37.1)   |
|         |         |                    |        | 2013 | 1,488            | (1,014 to 1,939)   | 18.6  | (12.8 to 24.0)   |
|         |         |                    | Female | 1990 | 2,227            | (1,589 to 2,823)   | 25.1  | (18.4 to 31.4)   |
|         |         |                    |        | 2013 | 1,839            | (1,316 to 2,638)   | 15.9  | (11.8 to 22.6)   |
|         |         |                    | Both   | 1990 | 3,939            | (3,219 to 4,731)   | 26.9  | (22.0 to 32.1)   |
|         |         |                    |        | 2013 | 3,328            | (2,641 to 4,241)   | 17.2  | (13.7 to 21.7)   |
|         | DALYs   | Ischemic Stroke    | Male   | 1990 | 40,618           | (34,097 to 50,192) | 668.9 | (561.3 to 827.0) |
|         |         |                    |        | 2013 | 30,870           | (24,023 to 37,652) | 390.3 | (304.4 to 473.6) |
|         |         |                    |        |      | Counts, All Ages |                    | Rate  | Per 100,000      |
|         |         |                    |        |      |                  |                    | Age-  | standardized     |
| Country | measure | Stroke Type        | sex    | year | Mean             | 95% UI             | Mean  | 95% UI           |

|             |        |                    |        |      |        |                    |       |                  |
|-------------|--------|--------------------|--------|------|--------|--------------------|-------|------------------|
|             |        |                    | Female | 1990 | 41,494 | (34,261 to 49,561) | 461   | (384.8 to 557.1) |
|             |        |                    |        | 2013 | 30,973 | (24,589 to 38,951) | 281.6 | (226.9 to 351.1) |
|             |        |                    | Both   | 1990 | 82,113 | (72,868 to 94,077) | 554.1 | (491.0 to 635.5) |
|             |        |                    |        | 2013 | 61,843 | (51,852 to 72,359) | 332.8 | (279.3 to 389.9) |
|             |        | Hemorrhagic Stroke | Male   | 1990 | 29,304 | (23,510 to 36,907) | 517.5 | (418.3 to 652.4) |
|             |        |                    |        | 2013 | 21,923 | (15,586 to 27,093) | 296.4 | (210.8 to 367.2) |
|             |        |                    | Female | 1990 | 29,206 | (22,326 to 36,030) | 404.8 | (317.9 to 497.7) |
|             |        |                    |        | 2013 | 19,849 | (15,491 to 26,859) | 220.6 | (173.9 to 288.5) |
|             |        |                    | Both   | 1990 | 58,511 | (50,304 to 68,705) | 456.9 | (397.4 to 535.8) |
|             |        |                    |        | 2013 | 41,773 | (33,567 to 49,780) | 256.8 | (206.9 to 301.1) |
|             | YLDs   | Ischemic Stroke    | Male   | 1990 | 5,330  | (3,422 to 7,763)   | 89.9  | (58.2 to 131.3)  |
|             |        |                    |        | 2013 | 6,156  | (3,859 to 8,891)   | 82.2  | (51.7 to 117.5)  |
|             |        |                    | Female | 1990 | 4,650  | (3,019 to 6,564)   | 60.7  | (40.0 to 84.8)   |
|             |        |                    |        | 2013 | 4,947  | (3,313 to 6,837)   | 56    | (37.6 to 77.8)   |
|             |        |                    | Both   | 1990 | 9,981  | (6,649 to 13,987)  | 73.8  | (49.6 to 103.6)  |
|             |        |                    |        | 2013 | 11,104 | (7,315 to 15,293)  | 68.6  | (45.8 to 94.5)   |
|             |        | Hemorrhagic Stroke | Male   | 1990 | 1,617  | (930 to 2,489)     | 28    | (16.3 to 42.9)   |
|             |        |                    |        | 2013 | 1,786  | (1,085 to 2,576)   | 24.9  | (15.3 to 35.5)   |
|             |        |                    | Female | 1990 | 1,303  | (768 to 1,989)     | 18.7  | (11.5 to 27.6)   |
|             |        |                    |        | 2013 | 1,459  | (917 to 2,185)     | 18.4  | (11.8 to 26.9)   |
|             |        |                    | Both   | 1990 | 2,921  | (1,906 to 4,165)   | 22.8  | (14.9 to 32.0)   |
|             |        |                    | Both   | 2013 | 3,246  | (2,091 to 4,517)   | 21.5  | (14.0 to 29.7)   |
| Switzerland | Deaths | Ischemic Stroke    | Male   | 1990 | 1,704  | (1,145 to 2,323)   | 45.7  | (30.6 to 62.3)   |
|             |        |                    |        | 2013 | 1,600  | (1,041 to 2,126)   | 25.5  | (16.5 to 33.9)   |
|             |        |                    | Female | 1990 | 2,896  | (2,241 to 3,484)   | 40.8  | (31.5 to 48.9)   |
|             |        |                    |        | 2013 | 2,653  | (1,962 to 3,802)   | 24.6  | (18.2 to 35.1)   |
|             |        |                    | Both   | 1990 | 4,601  | (3,641 to 5,410)   | 43.1  | (34.3 to 51.0)   |

|         |         |                    |        |      |                  |                    |       |                  |
|---------|---------|--------------------|--------|------|------------------|--------------------|-------|------------------|
|         |         |                    |        | 2013 | 4,253            | (3,398 to 5,380)   | 25.2  | (20.2 to 31.7)   |
|         | Deaths  | Hemorrhagic Stroke | Male   | 1990 | 1,003            | (662 to 1,599)     | 26.6  | (17.5 to 42.6)   |
|         |         |                    |        | 2013 | 1,054            | (631 to 1,503)     | 17.1  | (10.3 to 24.2)   |
|         |         |                    | Female | 1990 | 1,373            | (906 to 1,796)     | 21.3  | (14.3 to 27.2)   |
|         |         |                    |        | 2013 | 1,423            | (957 to 2,081)     | 14.3  | (10.0 to 20.2)   |
|         |         |                    | Both   | 1990 | 2,376            | (1,807 to 3,212)   | 23.6  | (18.1 to 31.6)   |
|         |         |                    |        | 2013 | 2,477            | (1,797 to 3,327)   | 15.6  | (11.5 to 20.5)   |
|         | DALYs   | Ischemic Stroke    | Male   | 1990 | 23,096           | (16,316 to 30,278) | 606.9 | (429.6 to 794.3) |
|         |         |                    |        | 2013 | 19,871           | (14,279 to 24,946) | 328.1 | (236.7 to 411.7) |
|         |         |                    | Female | 1990 | 28,154           | (22,738 to 33,313) | 444.1 | (359.1 to 523.1) |
|         |         |                    |        | 2013 | 22,551           | (17,367 to 30,811) | 247.3 | (190.3 to 337.9) |
|         |         |                    | Both   | 1990 | 51,251           | (41,731 to 60,593) | 513.5 | (416.2 to 603.2) |
|         |         |                    |        |      | Counts, All Ages |                    | Rate  | Per 100,000      |
|         |         |                    |        |      |                  |                    | Age-  | standardized     |
| Country | measure | Stroke Type        | sex    | year | Mean             | 95% UI             | Mean  | 95% UI           |
|         |         |                    |        | 2013 | 42,423           | (35,155 to 51,229) | 284.5 | (234.3 to 343.3) |
|         |         | Hemorrhagic Stroke | Male   | 1990 | 16,547           | (11,843 to 24,510) | 433.4 | (310.2 to 643.5) |
|         |         |                    |        | 2013 | 13,996           | (9,172 to 18,326)  | 237.4 | (156.6 to 308.7) |
|         |         |                    | Female | 1990 | 16,903           | (11,925 to 20,821) | 316.2 | (227.3 to 382.6) |
|         |         |                    |        | 2013 | 13,580           | (10,142 to 18,324) | 172.8 | (131.8 to 226.3) |
|         |         |                    | Both   | 1990 | 33,450           | (26,995 to 43,155) | 366.8 | (298.8 to 468.2) |
|         |         |                    |        | 2013 | 27,577           | (21,312 to 34,346) | 202.4 | (157.9 to 247.7) |
|         | YLDs    | Ischemic Stroke    | Male   | 1990 | 3,288            | (2,058 to 4,704)   | 85.7  | (53.6 to 122.3)  |
|         |         |                    |        | 2013 | 5,110            | (3,322 to 7,066)   | 87.5  | (57.0 to 121.3)  |
|         |         |                    | Female | 1990 | 3,360            | (2,214 to 4,716)   | 62.4  | (41.3 to 86.6)   |
|         |         |                    |        | 2013 | 4,537            | (3,000 to 6,490)   | 61.8  | (41.0 to 87.6)   |
|         |         |                    | Both   | 1990 | 6,649            | (4,396 to 9,002)   | 72.4  | (48.2 to 98.0)   |

|       |        |                    |        |      |         |                      |        |                    |
|-------|--------|--------------------|--------|------|---------|----------------------|--------|--------------------|
|       |        |                    |        | 2013 | 9,648   | (6,577 to 12,988)    | 73.9   | (50.3 to 99.6)     |
|       |        | Hemorrhagic Stroke | Male   | 1990 | 657     | (386 to 1,060)       | 17.3   | (10.2 to 27.6)     |
|       |        |                    |        | 2013 | 1,013   | (528 to 1,781)       | 17.9   | (9.5 to 31.1)      |
|       |        |                    | Female | 1990 | 680     | (369 to 1,072)       | 13.6   | (7.5 to 21.7)      |
|       |        |                    |        | 2013 | 947     | (539 to 1,718)       | 14     | (8.0 to 24.7)      |
|       |        |                    | Both   | 1990 | 1,337   | (847 to 1,977)       | 15.2   | (9.7 to 22.5)      |
|       |        |                    | Both   | 2013 | 1,960   | (1,167 to 3,029)     | 15.8   | (9.7 to 24.2)      |
| Syria | Deaths | Ischemic Stroke    | Male   | 1990 | 1,154   | (719 to 1,745)       | 63.8   | (39.5 to 97.4)     |
|       |        |                    |        | 2013 | 1,857   | (715 to 2,971)       | 46     | (17.7 to 74.1)     |
|       |        |                    | Female | 1990 | 1,144   | (779 to 1,967)       | 57.6   | (39.0 to 99.3)     |
|       |        |                    |        | 2013 | 1,877   | (976 to 2,621)       | 43.6   | (22.6 to 61.1)     |
|       |        |                    | Both   | 1990 | 2,298   | (1,700 to 3,380)     | 60.6   | (44.9 to 89.5)     |
|       |        |                    |        | 2013 | 3,735   | (2,133 to 5,107)     | 44.8   | (25.3 to 61.8)     |
|       | Deaths | Hemorrhagic Stroke | Male   | 1990 | 4,159   | (3,206 to 5,400)     | 165.6  | (126.3 to 213.8)   |
|       |        |                    |        | 2013 | 5,487   | (3,580 to 7,498)     | 113.7  | (71.8 to 156.6)    |
|       |        |                    | Female | 1990 | 2,503   | (1,845 to 3,708)     | 111.7  | (81.6 to 170.9)    |
|       |        |                    |        | 2013 | 3,959   | (2,682 to 5,209)     | 87.3   | (57.5 to 115.2)    |
|       |        |                    | Both   | 1990 | 6,663   | (5,388 to 8,425)     | 138.4  | (112.2 to 177.5)   |
|       |        |                    |        | 2013 | 9,446   | (7,134 to 11,925)    | 100.4  | (74.9 to 130.2)    |
|       | DALYs  | Ischemic Stroke    | Male   | 1990 | 28,058  | (17,424 to 43,257)   | 1073.7 | (671.7 to 1606.8)  |
|       |        |                    |        | 2013 | 33,728  | (13,465 to 54,795)   | 665    | (264.9 to 1070.5)  |
|       |        |                    | Female | 1990 | 30,195  | (21,001 to 49,402)   | 1010.7 | (686.0 to 1746.6)  |
|       |        |                    |        | 2013 | 33,426  | (16,705 to 47,697)   | 602.9  | (312.8 to 848.5)   |
|       |        |                    | Both   | 1990 | 58,253  | (43,839 to 85,340)   | 1041.1 | (770.9 to 1519.1)  |
|       |        |                    |        | 2013 | 67,154  | (38,583 to 91,753)   | 633    | (367.1 to 867.3)   |
|       |        | Hemorrhagic Stroke | Male   | 1990 | 158,616 | (121,342 to 205,125) | 3951.6 | (3007.4 to 5148.4) |



| Country | measure | Stroke Type        | sex    | year | Counts, All Ages |                      | Rate Per 100,000 Age-standardized |                    |
|---------|---------|--------------------|--------|------|------------------|----------------------|-----------------------------------|--------------------|
|         |         |                    |        |      | Mean             | 95% UI               | Mean                              | 95% UI             |
|         |         |                    |        | 2013 | 139,530          | (94,109 to 193,197)  | 2130.2                            | (1398.2 to 2919.9) |
|         |         |                    | Female | 1990 | 82,109           | (57,897 to 118,405)  | 2245.4                            | (1624.8 to 3365.2) |
|         |         |                    |        | 2013 | 79,477           | (54,851 to 105,639)  | 1334.6                            | (900.1 to 1765.5)  |
|         |         |                    | Both   | 1990 | 240,726          | (189,777 to 301,335) | 3103.3                            | (2490.1 to 3933.9) |
|         |         |                    |        | 2013 | 219,007          | (170,266 to 277,326) | 1731.6                            | (1309.0 to 2196.8) |
|         | YLDs    | Ischemic Stroke    | Male   | 1990 | 234              | (155 to 337)         | 9                                 | (6.0 to 13.2)      |
|         |         |                    |        | 2013 | 598              | (392 to 836)         | 9.5                               | (6.3 to 13.3)      |
|         |         |                    | Female | 1990 | 189              | (125 to 277)         | 7.4                               | (4.9 to 10.8)      |
|         |         |                    |        | 2013 | 460              | (294 to 657)         | 7.4                               | (4.8 to 10.4)      |
|         |         |                    | Both   | 1990 | 423              | (286 to 584)         | 8.2                               | (5.6 to 11.2)      |
|         |         |                    |        | 2013 | 1,058            | (706 to 1,421)       | 8.4                               | (5.7 to 11.3)      |
|         |         | Hemorrhagic Stroke | Male   | 1990 | 41               | (24 to 64)           | 1.4                               | (0.8 to 2.1)       |
|         |         |                    |        | 2013 | 97               | (58 to 152)          | 1.4                               | (0.8 to 2.1)       |
|         |         |                    | Female | 1990 | 39               | (21 to 60)           | 1.4                               | (0.8 to 2.1)       |
|         |         |                    |        | 2013 | 91               | (44 to 151)          | 1.3                               | (0.7 to 2.2)       |
|         |         |                    | Both   | 1990 | 81               | (51 to 118)          | 1.4                               | (0.9 to 2.0)       |
|         |         |                    | Both   | 2013 | 189              | (117 to 286)         | 1.3                               | (0.8 to 2.0)       |
| Taiwan  | Deaths  | Ischemic Stroke    | Male   | 1990 | 2,838            | (2,150 to 3,598)     | 53.4                              | (40.0 to 67.9)     |
|         |         |                    |        | 2013 | 3,770            | (3,030 to 4,707)     | 26.3                              | (21.3 to 33.0)     |
|         |         |                    | Female | 1990 | 2,169            | (1,467 to 2,912)     | 44.4                              | (30.3 to 59.6)     |
|         |         |                    |        | 2013 | 3,045            | (2,342 to 4,054)     | 19.5                              | (15.0 to 25.9)     |

|                  |         |                    |        |      |         |                      |                              |                             |
|------------------|---------|--------------------|--------|------|---------|----------------------|------------------------------|-----------------------------|
|                  |         |                    | Both   | 1990 | 5,008   | (4,001 to 6,005)     | 49.4                         | (39.5 to 59.0)              |
|                  |         |                    |        | 2013 | 6,816   | (5,851 to 8,123)     | 22.6                         | (19.6 to 27.0)              |
|                  | Deaths  | Hemorrhagic Stroke | Male   | 1990 | 4,144   | (3,300 to 5,210)     | 62.4                         | (49.0 to 78.5)              |
|                  |         |                    |        | 2013 | 4,386   | (3,610 to 5,311)     | 30.3                         | (24.9 to 36.4)              |
|                  |         |                    | Female | 1990 | 2,865   | (1,927 to 3,608)     | 50.4                         | (33.1 to 64.1)              |
|                  |         |                    |        | 2013 | 2,998   | (2,366 to 4,009)     | 19.5                         | (15.5 to 25.9)              |
|                  |         |                    | Both   | 1990 | 7,009   | (5,692 to 8,317)     | 57                           | (45.1 to 68.3)              |
|                  |         |                    |        | 2013 | 7,385   | (6,422 to 8,848)     | 24.7                         | (21.5 to 29.5)              |
|                  | DALYs   | Ischemic Stroke    | Male   | 1990 | 53,223  | (40,418 to 67,020)   | 803.8                        | (621.4 to 1009.4)           |
|                  |         |                    |        | 2013 | 54,481  | (45,536 to 66,295)   | 392.6                        | (329.1 to 476.1)            |
|                  |         |                    | Female | 1990 | 31,659  | (21,731 to 42,056)   | 563.6                        | (390.6 to 742.9)            |
|                  |         |                    |        | 2013 | 34,272  | (28,033 to 43,499)   | 224.1                        | (183.8 to 286.0)            |
|                  |         |                    | Both   | 1990 | 84,883  | (68,053 to 103,166)  | 692.9                        | (559.7 to 829.8)            |
|                  |         |                    |        | 2013 | 88,754  | (78,094 to 103,986)  | 303.8                        | (267.7 to 356.2)            |
| Counts, All Ages |         |                    |        |      |         |                      |                              |                             |
| Country          | measure | Stroke Type        | sex    | year | Mean    | 95% UI               | Rate<br>Age-<br>standardized | Per 100,000<br>standardized |
|                  |         | Hemorrhagic Stroke | Male   | 1990 | 108,451 | (87,358 to 131,172)  | 1339.1                       | (1081.2 to 1645.6)          |
|                  |         |                    |        | 2013 | 96,943  | (82,476 to 113,804)  | 673.3                        | (572.4 to 783.8)            |
|                  |         |                    | Female | 1990 | 63,163  | (45,518 to 78,777)   | 919.6                        | (647.9 to 1143.7)           |
|                  |         |                    |        | 2013 | 50,855  | (43,119 to 65,378)   | 340.3                        | (290.6 to 440.2)            |
|                  |         |                    | Both   | 1990 | 171,614 | (143,926 to 199,058) | 1141.9                       | (946.6 to 1330.2)           |
|                  |         |                    |        | 2013 | 147,798 | (131,553 to 170,185) | 502.3                        | (447.4 to 581.7)            |

|            |        |                    |        |      |        |                    |        |                   |
|------------|--------|--------------------|--------|------|--------|--------------------|--------|-------------------|
|            | YLDs   | Ischemic Stroke    | Male   | 1990 | 3,976  | (2,465 to 5,759)   | 57     | (35.5 to 81.2)    |
|            |        |                    |        | 2013 | 6,669  | (3,914 to 9,722)   | 47.8   | (27.8 to 69.7)    |
|            |        |                    | Female | 1990 | 2,200  | (1,370 to 3,183)   | 35.2   | (22.0 to 51.3)    |
|            |        |                    |        | 2013 | 4,813  | (3,038 to 7,035)   | 31.6   | (19.9 to 46.5)    |
|            |        |                    | Both   | 1990 | 6,176  | (4,070 to 8,707)   | 46.4   | (30.9 to 64.4)    |
|            |        |                    |        | 2013 | 11,482 | (7,505 to 16,092)  | 39.3   | (25.7 to 55.2)    |
|            |        | Hemorrhagic Stroke | Male   | 1990 | 3,696  | (2,474 to 5,179)   | 50.9   | (33.7 to 72.4)    |
|            |        |                    |        | 2013 | 6,939  | (4,283 to 10,244)  | 49.2   | (30.3 to 72.5)    |
|            |        |                    | Female | 1990 | 2,400  | (1,548 to 3,482)   | 36.2   | (23.7 to 52.1)    |
|            |        |                    |        | 2013 | 4,763  | (3,088 to 6,876)   | 31.3   | (20.3 to 44.9)    |
|            |        |                    | Both   | 1990 | 6,096  | (4,188 to 8,373)   | 43.6   | (29.9 to 59.8)    |
|            |        |                    | Both   | 2013 | 11,702 | (7,795 to 16,447)  | 39.8   | (26.4 to 56.3)    |
| Tajikistan | Deaths | Ischemic Stroke    | Male   | 1990 | 877    | (539 to 1,392)     | 103.9  | (65.7 to 159.0)   |
|            |        |                    |        | 2013 | 1,140  | (684 to 1,707)     | 91.7   | (57.3 to 130.1)   |
|            |        |                    | Female | 1990 | 1,082  | (823 to 1,515)     | 87.7   | (67.1 to 121.9)   |
|            |        |                    |        | 2013 | 1,301  | (751 to 1,699)     | 84.8   | (48.7 to 110.2)   |
|            |        |                    | Both   | 1990 | 1,959  | (1,557 to 2,680)   | 94.2   | (75.4 to 126.6)   |
|            |        |                    |        | 2013 | 2,442  | (1,572 to 3,012)   | 88.2   | (56.9 to 107.9)   |
|            | Deaths | Hemorrhagic Stroke | Male   | 1990 | 1,023  | (552 to 1,363)     | 106.4  | (56.1 to 144.2)   |
|            |        |                    |        | 2013 | 1,273  | (768 to 1,814)     | 87.8   | (51.8 to 127.5)   |
|            |        |                    | Female | 1990 | 1,218  | (847 to 1,523)     | 92.9   | (63.4 to 116.1)   |
|            |        |                    |        | 2013 | 1,457  | (1,071 to 1,940)   | 84.3   | (60.9 to 114.1)   |
|            |        |                    | Both   | 1990 | 2,241  | (1,537 to 2,654)   | 98.2   | (66.0 to 117.1)   |
|            |        |                    |        | 2013 | 2,731  | (2,087 to 3,492)   | 86     | (65.2 to 112.1)   |
|            | DALYs  | Ischemic Stroke    | Male   | 1990 | 14,666 | (8,448 to 25,292)  | 1506.6 | (898.1 to 2476.6) |
|            |        |                    |        | 2013 | 18,770 | (10,535 to 30,389) | 1272.4 | (744.0 to 1965.2) |
|            |        |                    | Female | 1990 | 15,690 | (11,633 to 22,752) | 1188.2 | (888.3 to 1701.9) |

|          |         |                    |        | 2013             | 18,083 | (10,497 to 24,112) | 1071.4 | (617.1 to 1438.2)  |
|----------|---------|--------------------|--------|------------------|--------|--------------------|--------|--------------------|
|          |         |                    | Both   | 1990             | 30,357 | (23,270 to 43,829) | 1319.5 | (1025.8 to 1861.9) |
|          |         |                    |        | 2013             | 36,853 | (23,516 to 48,038) | 1167.2 | (748.0 to 1468.3)  |
|          |         |                    |        |                  |        |                    |        |                    |
|          |         |                    |        | Counts, All Ages |        | Rate Per 100,000   |        |                    |
| Country  | measure | Stroke Type        | sex    | year             | Mean   | 95% UI             | Mean   | 95% UI             |
|          |         | Hemorrhagic Stroke | Male   | 1990             | 22,535 | (12,540 to 29,376) | 1960.7 | (1067.4 to 2580.1) |
|          |         |                    |        | 2013             | 28,588 | (17,485 to 40,093) | 1570.6 | (940.8 to 2213.5)  |
|          |         |                    | Female | 1990             | 24,586 | (18,338 to 30,491) | 1724.6 | (1259.9 to 2121.6) |
|          |         |                    |        | 2013             | 30,767 | (23,018 to 40,243) | 1496.7 | (1106.3 to 1983.9) |
|          |         |                    | Both   | 1990             | 47,121 | (34,019 to 55,043) | 1817.5 | (1280.1 to 2136.7) |
|          |         |                    |        | 2013             | 59,355 | (46,138 to 73,790) | 1530.7 | (1174.0 to 1934.3) |
|          | YLDs    | Ischemic Stroke    | Male   | 1990             | 104    | (65 to 156)        | 8.7    | (5.4 to 12.9)      |
|          |         |                    |        | 2013             | 168    | (105 to 250)       | 8.5    | (5.2 to 12.6)      |
|          |         |                    | Female | 1990             | 112    | (70 to 160)        | 7.8    | (4.9 to 11.3)      |
|          |         |                    |        | 2013             | 170    | (106 to 248)       | 8      | (5.1 to 11.5)      |
|          |         |                    | Both   | 1990             | 217    | (140 to 306)       | 8.2    | (5.4 to 11.6)      |
|          |         |                    |        | 2013             | 338    | (228 to 470)       | 8.2    | (5.6 to 11.3)      |
|          |         | Hemorrhagic Stroke | Male   | 1990             | 116    | (72 to 168)        | 8.3    | (5.2 to 11.9)      |
|          |         |                    |        | 2013             | 188    | (121 to 274)       | 7.8    | (5.0 to 11.3)      |
|          |         |                    | Female | 1990             | 74     | (45 to 108)        | 4.7    | (2.9 to 7.0)       |
|          |         |                    |        | 2013             | 117    | (72 to 173)        | 4.8    | (3.0 to 7.1)       |
|          |         |                    | Both   | 1990             | 190    | (124 to 263)       | 6.4    | (4.2 to 8.8)       |
|          |         |                    | Both   | 2013             | 306    | (203 to 425)       | 6.2    | (4.2 to 8.5)       |
| Tanzania | Deaths  | Ischemic Stroke    | Male   | 1990             | 1,003  | (267 to 1,542)     | 38.3   | (10.3 to 58.6)     |
|          |         |                    |        | 2013             | 2,477  | (849 to 3,683)     | 42.1   | (14.9 to 61.7)     |

|         |         |                    |        |      |             |                      |       |                   |
|---------|---------|--------------------|--------|------|-------------|----------------------|-------|-------------------|
|         |         |                    | Female | 1990 | 1,086       | (459 to 1,560)       | 33.5  | (13.7 to 49.5)    |
|         |         |                    |        | 2013 | 2,536       | (1,163 to 3,808)     | 34.1  | (15.8 to 51.9)    |
|         |         |                    | Both   | 1990 | 2,090       | (897 to 2,931)       | 35.6  | (15.5 to 50.0)    |
|         |         |                    |        | 2013 | 5,013       | (2,398 to 7,038)     | 37.6  | (18.2 to 52.8)    |
|         | Deaths  | Hemorrhagic Stroke | Male   | 1990 | 1,430       | (948 to 2,002)       | 40.1  | (24.0 to 60.1)    |
|         |         |                    |        | 2013 | 3,004       | (2,017 to 4,518)     | 41.1  | (25.9 to 65.5)    |
|         |         |                    | Female | 1990 | 1,583       | (1,099 to 2,263)     | 37.7  | (24.3 to 56.1)    |
|         |         |                    |        | 2013 | 3,148       | (2,111 to 4,572)     | 35.4  | (22.7 to 53.4)    |
|         |         |                    | Both   | 1990 | 3,014       | (2,280 to 3,892)     | 38.8  | (26.9 to 52.0)    |
|         |         |                    |        | 2013 | 6,152       | (4,534 to 8,434)     | 37.9  | (26.2 to 52.9)    |
|         | DALYs   | Ischemic Stroke    | Male   | 1990 | 19,243      | (5,896 to 28,872)    | 537.7 | (154.0 to 819.2)  |
|         |         |                    |        | 2013 | 41,285      | (14,263 to 62,043)   | 560.4 | (196.6 to 832.4)  |
|         |         |                    | Female | 1990 | 18,641      | (8,509 to 26,611)    | 453.2 | (201.7 to 645.2)  |
|         |         |                    |        | 2013 | 39,533      | (18,515 to 58,705)   | 446.7 | (209.8 to 666.3)  |
|         |         |                    | Both   | 1990 | 37,884      | (17,400 to 51,913)   | 491.7 | (220.4 to 683.2)  |
|         |         |                    |        | 2013 | 80,819      | (39,023 to 113,084)  | 497.5 | (241.3 to 697.0)  |
|         |         | Hemorrhagic Stroke | Male   | 1990 | 39,248      | (28,641 to 51,108)   | 753.7 | (500.7 to 1052.8) |
|         |         |                    |        | 2013 | 71,625      | (50,449 to 99,711)   | 713.1 | (485.6 to 1061.1) |
|         |         |                    |        |      | Counts, All | Ages                 | Rate  | Per 100,000       |
| Country | measure | Stroke Type        | sex    | year | Mean        | 95% UI               | Age-  | standardized      |
|         |         |                    | Female | 1990 | 39,659      | (28,627 to 55,048)   | Mean  | 95% UI            |
|         |         |                    |        | 2013 | 71,793      | (50,953 to 101,755)  | 693.9 | (486.6 to 989.0)  |
|         |         |                    | Both   | 1990 | 78,908      | (63,915 to 99,053)   | 627.4 | (426.2 to 898.8)  |
|         |         |                    |        | 2013 | 143,418     | (111,785 to 182,026) | 722.2 | (550.5 to 932.3)  |
|         |         |                    |        | 2013 | 143,418     | (111,785 to 182,026) | 666.3 | (503.9 to 899.5)  |

|          |        |                    |        |      |         |                     |       |                  |
|----------|--------|--------------------|--------|------|---------|---------------------|-------|------------------|
|          | YLDs   | Ischemic Stroke    | Male   | 1990 | 688     | (421 to 1,018)      | 14    | (8.8 to 20.6)    |
|          |        |                    |        | 2013 | 1,300   | (799 to 1,971)      | 12.1  | (7.3 to 18.5)    |
|          |        |                    | Female | 1990 | 573     | (350 to 862)        | 10.4  | (6.4 to 15.4)    |
|          |        |                    |        | 2013 | 1,049   | (656 to 1,568)      | 9     | (5.7 to 13.6)    |
|          |        |                    | Both   | 1990 | 1,262   | (819 to 1,810)      | 12    | (7.9 to 17.1)    |
|          |        |                    |        | 2013 | 2,350   | (1,528 to 3,371)    | 10.4  | (6.8 to 15.0)    |
|          |        | Hemorrhagic Stroke | Male   | 1990 | 240     | (148 to 349)        | 3.9   | (2.5 to 5.9)     |
|          |        |                    |        | 2013 | 457     | (280 to 693)        | 3.5   | (2.0 to 5.3)     |
|          |        |                    | Female | 1990 | 180     | (109 to 276)        | 2.8   | (1.7 to 4.2)     |
|          |        |                    |        | 2013 | 326     | (195 to 495)        | 2.4   | (1.4 to 3.7)     |
|          |        |                    | Both   | 1990 | 421     | (277 to 599)        | 3.3   | (2.2 to 4.7)     |
|          |        |                    | Both   | 2013 | 784     | (502 to 1,144)      | 2.9   | (1.8 to 4.3)     |
| Thailand | Deaths | Ischemic Stroke    | Male   | 1990 | 2,783   | (2,132 to 4,033)    | 26.4  | (20.1 to 38.1)   |
|          |        |                    |        | 2013 | 9,007   | (5,485 to 12,501)   | 32    | (19.2 to 44.8)   |
|          |        |                    | Female | 1990 | 3,874   | (3,037 to 5,122)    | 29.3  | (23.1 to 38.8)   |
|          |        |                    |        | 2013 | 12,045  | (7,433 to 16,783)   | 33.7  | (20.8 to 46.9)   |
|          |        |                    | Both   | 1990 | 6,657   | (5,701 to 8,726)    | 28.4  | (24.1 to 37.3)   |
|          |        |                    |        | 2013 | 21,052  | (14,733 to 27,158)  | 33.1  | (23.2 to 43.0)   |
|          | Deaths | Hemorrhagic Stroke | Male   | 1990 | 12,432  | (10,545 to 14,982)  | 99.5  | (84.5 to 116.1)  |
|          |        |                    |        | 2013 | 19,574  | (14,442 to 26,585)  | 65.4  | (47.7 to 90.1)   |
|          |        |                    | Female | 1990 | 14,033  | (10,059 to 15,769)  | 100.7 | (72.8 to 113.4)  |
|          |        |                    |        | 2013 | 21,073  | (14,225 to 35,291)  | 58.1  | (39.0 to 97.9)   |
|          |        |                    | Both   | 1990 | 26,466  | (22,190 to 29,292)  | 101.7 | (83.7 to 111.9)  |
|          |        |                    |        | 2013 | 40,647  | (30,836 to 58,425)  | 61.9  | (46.6 to 90.2)   |
|          | DALYs  | Ischemic Stroke    | Male   | 1990 | 56,089  | (43,270 to 81,767)  | 394.9 | (308.5 to 564.2) |
|          |        |                    |        | 2013 | 145,097 | (93,598 to 195,725) | 460.1 | (297.8 to 619.4) |

|         |         |                    |        |      |             |                      |        |                    |
|---------|---------|--------------------|--------|------|-------------|----------------------|--------|--------------------|
|         |         |                    | Female | 1990 | 55,801      | (44,670 to 73,184)   | 359.7  | (294.0 to 476.9)   |
|         |         |                    |        | 2013 | 146,257     | (95,284 to 193,084)  | 391    | (255.5 to 521.7)   |
|         |         |                    | Both   | 1990 | 111,891     | (95,057 to 144,911)  | 378.9  | (324.8 to 489.4)   |
|         |         |                    |        | 2013 | 291,355     | (215,920 to 359,999) | 424.7  | (314.9 to 527.3)   |
|         |         | Hemorrhagic Stroke | Male   | 1990 | 327,815     | (271,320 to 427,660) | 1824.5 | (1545.7 to 2247.3) |
|         |         |                    |        |      | Counts, All | Ages                 | Rate   | Per 100,000        |
|         |         |                    |        |      |             |                      | Age-   | standardized       |
| Country | measure | Stroke Type        | sex    | year | Mean        | 95% UI               | Mean   | 95% UI             |
|         |         |                    |        | 2013 | 405,289     | (305,221 to 536,209) | 1188.8 | (897.1 to 1565.6)  |
|         |         |                    | Female | 1990 | 240,201     | (163,869 to 272,101) | 1384.7 | (978.9 to 1549.6)  |
|         |         |                    |        | 2013 | 296,690     | (214,572 to 463,705) | 775.4  | (555.7 to 1228.7)  |
|         |         |                    | Both   | 1990 | 568,017     | (482,759 to 653,827) | 1606.7 | (1363.0 to 1793.9) |
|         |         |                    |        | 2013 | 701,979     | (553,477 to 919,152) | 975.6  | (766.6 to 1298.3)  |
|         | YLDs    | Ischemic Stroke    | Male   | 1990 | 3,981       | (2,712 to 5,506)     | 28.6   | (19.3 to 40.5)     |
|         |         |                    |        | 2013 | 9,638       | (6,464 to 13,453)    | 30     | (20.1 to 41.8)     |
|         |         |                    | Female | 1990 | 3,673       | (2,461 to 5,228)     | 22.6   | (14.8 to 32.0)     |
|         |         |                    |        | 2013 | 8,870       | (5,813 to 12,755)    | 23     | (15.0 to 33.0)     |
|         |         |                    | Both   | 1990 | 7,655       | (5,322 to 10,435)    | 25.3   | (17.7 to 34.4)     |
|         |         |                    |        | 2013 | 18,508      | (12,663 to 25,591)   | 26.1   | (17.8 to 36.0)     |
|         |         | Hemorrhagic Stroke | Male   | 1990 | 4,845       | (3,222 to 6,833)     | 31.1   | (20.9 to 43.1)     |
|         |         |                    |        | 2013 | 10,715      | (7,232 to 14,894)    | 32     | (21.7 to 44.4)     |

|             |         |                    |        |      |             |                    |              |                        |
|-------------|---------|--------------------|--------|------|-------------|--------------------|--------------|------------------------|
|             |         |                    | Female | 1990 | 3,896       | (2,557 to 5,447)   | 22           | (14.0 to 31.1)         |
|             |         |                    |        | 2013 | 8,562       | (5,498 to 12,186)  | 21.8         | (14.1 to 31.0)         |
|             |         |                    | Both   | 1990 | 8,742       | (5,932 to 11,964)  | 26.1         | (17.7 to 35.7)         |
|             |         |                    | Both   | 2013 | 19,277      | (13,223 to 26,427) | 26.5         | (18.2 to 36.2)         |
| The Bahamas | Deaths  | Ischemic Stroke    | Male   | 1990 | 45          | (37 to 55)         | 99.8         | (79.5 to 122.2)        |
|             |         |                    |        | 2013 | 84          | (59 to 110)        | 73.6         | (52.9 to 95.8)         |
|             |         |                    | Female | 1990 | 58          | (44 to 67)         | 92.8         | (71.8 to 107.5)        |
|             |         |                    |        | 2013 | 109         | (77 to 143)        | 64.4         | (45.7 to 83.7)         |
|             |         |                    | Both   | 1990 | 104         | (88 to 117)        | 96.4         | (80.9 to 108.6)        |
|             |         |                    |        | 2013 | 194         | (154 to 233)       | 68.8         | (55.2 to 82.6)         |
|             | Deaths  | Hemorrhagic Stroke | Male   | 1990 | 29          | (23 to 37)         | 52.4         | (41.1 to 67.5)         |
|             |         |                    |        | 2013 | 57          | (37 to 78)         | 42.6         | (27.5 to 58.0)         |
|             |         |                    | Female | 1990 | 35          | (28 to 45)         | 51.1         | (40.8 to 65.5)         |
|             |         |                    |        | 2013 | 70          | (46 to 95)         | 39.8         | (26.4 to 53.8)         |
|             |         |                    | Both   | 1990 | 65          | (56 to 80)         | 52           | (44.1 to 63.8)         |
|             |         |                    |        | 2013 | 128         | (95 to 159)        | 41.4         | (31.0 to 51.5)         |
|             | DALYs   | Ischemic Stroke    | Male   | 1990 | 949         | (762 to 1,147)     | 1635.9       | (1316.5 to 1980.1)     |
|             |         |                    |        | 2013 | 1,607       | (1,111 to 2,160)   | 1154.8       | (822.3 to 1514.9)      |
|             |         |                    | Female | 1990 | 946         | (733 to 1,105)     | 1328.7       | (1034.5 to 1545.8)     |
|             |         |                    |        | 2013 | 1,564       | (1,089 to 2,086)   | 871.7        | (611.0 to 1164.0)      |
|             |         |                    | Both   | 1990 | 1,896       | (1,626 to 2,132)   | 1470.2       | (1259.7 to 1650.1)     |
|             |         |                    |        | 2013 | 3,171       | (2,505 to 3,858)   | 1000.8       | (795.9 to 1210.3)      |
|             |         |                    |        |      |             |                    |              |                        |
|             |         |                    |        |      | Counts, All | Ages               | Rate         | Per 100,000            |
| Country     | measure | Stroke Type        | sex    | year | Mean        | 95% UI             | Age-<br>Mean | standardized<br>95% UI |
|             |         | Hemorrhagic Stroke | Male   | 1990 | 855         | (686 to 1,057)     | 1138.7       | (907.3 to 1430.4)      |



|            |        |                    |        |      |       |                  |        |                   |
|------------|--------|--------------------|--------|------|-------|------------------|--------|-------------------|
|            |        |                    |        | 2013 | 1,406 | (902 to 1,968)   | 864.2  | (567.8 to 1186.2) |
|            |        |                    | Female | 1990 | 855   | (685 to 1,055)   | 1008.5 | (811.9 to 1263.4) |
|            |        |                    |        | 2013 | 1,365 | (882 to 1,868)   | 714    | (470.3 to 962.7)  |
|            |        |                    | Both   | 1990 | 1,710 | (1,480 to 2,050) | 1071.3 | (930.7 to 1301.0) |
|            |        |                    |        | 2013 | 2,771 | (2,068 to 3,497) | 786.4  | (592.2 to 983.4)  |
|            | YLDs   | Ischemic Stroke    | Male   | 1990 | 26    | (17 to 37)       | 47.3   | (31.5 to 67.7)    |
|            |        |                    |        | 2013 | 67    | (43 to 95)       | 48.4   | (31.4 to 69.5)    |
|            |        |                    | Female | 1990 | 23    | (15 to 33)       | 32.5   | (21.7 to 46.1)    |
|            |        |                    |        | 2013 | 58    | (38 to 85)       | 32.1   | (20.9 to 47.0)    |
|            |        |                    | Both   | 1990 | 49    | (34 to 68)       | 38.8   | (26.5 to 53.7)    |
|            |        |                    |        | 2013 | 125   | (86 to 172)      | 39     | (27.0 to 53.6)    |
|            |        | Hemorrhagic Stroke | Male   | 1990 | 9     | (5 to 14)        | 14.4   | (8.7 to 22.5)     |
|            |        |                    |        | 2013 | 22    | (14 to 34)       | 14.6   | (9.2 to 21.7)     |
|            |        |                    | Female | 1990 | 8     | (4 to 12)        | 10.1   | (6.0 to 15.2)     |
|            |        |                    |        | 2013 | 21    | (12 to 38)       | 11.1   | (6.5 to 20.6)     |
|            |        |                    | Both   | 1990 | 17    | (11 to 25)       | 12     | (7.6 to 17.5)     |
|            |        |                    | Both   | 2013 | 43    | (28 to 64)       | 12.6   | (8.1 to 19.0)     |
| The Gambia | Deaths | Ischemic Stroke    | Male   | 1990 | 80    | (45 to 133)      | 68.7   | (42.7 to 106.9)   |
|            |        |                    |        | 2013 | 219   | (127 to 331)     | 104.1  | (65.0 to 149.9)   |
|            |        |                    | Female | 1990 | 80    | (40 to 127)      | 79.3   | (44.3 to 119.0)   |
|            |        |                    |        | 2013 | 220   | (97 to 341)      | 112.1  | (53.6 to 167.6)   |
|            |        |                    | Both   | 1990 | 160   | (99 to 248)      | 73.9   | (49.0 to 108.1)   |
|            |        |                    |        | 2013 | 439   | (247 to 668)     | 108.2  | (64.6 to 155.3)   |
|            | Deaths | Hemorrhagic Stroke | Male   | 1990 | 81    | (47 to 134)      | 52     | (29.8 to 88.1)    |
|            |        |                    |        | 2013 | 131   | (68 to 252)      | 47.1   | (23.5 to 93.8)    |
|            |        |                    | Female | 1990 | 87    | (52 to 135)      | 66.1   | (40.5 to 102.9)   |
|            |        |                    |        | 2013 | 138   | (77 to 265)      | 52.2   | (28.5 to 106.2)   |

|         |         |                    |        |      |             |                   |        |                   |
|---------|---------|--------------------|--------|------|-------------|-------------------|--------|-------------------|
|         |         |                    | Both   | 1990 | 169         | (106 to 267)      | 58.7   | (36.8 to 92.4)    |
|         |         |                    |        | 2013 | 270         | (153 to 469)      | 49.7   | (27.6 to 93.7)    |
|         | DALYs   | Ischemic Stroke    | Male   | 1990 | 1,749       | (947 to 2,947)    | 1090.5 | (623.2 to 1810.5) |
|         |         |                    |        | 2013 | 4,393       | (2,406 to 6,887)  | 1602.8 | (928.7 to 2415.8) |
|         |         |                    | Female | 1990 | 1,621       | (722 to 2,609)    | 1183.4 | (584.2 to 1862.3) |
|         |         |                    |        | 2013 | 4,042       | (1,671 to 6,562)  | 1606.2 | (703.1 to 2514.8) |
|         |         |                    | Both   | 1990 | 3,371       | (1,996 to 5,230)  | 1136   | (699.6 to 1745.3) |
|         |         |                    |        | 2013 | 8,435       | (4,410 to 13,169) | 1605   | (892.0 to 2448.6) |
|         |         | Hemorrhagic Stroke | Male   | 1990 | 2,719       | (1,671 to 4,339)  | 1089.4 | (619.5 to 1805.2) |
|         |         |                    |        | 2013 | 3,916       | (2,135 to 6,785)  | 963.1  | (498.5 to 1861.9) |
|         |         |                    |        |      | Counts, All | Ages              | Rate   | Per 100,000       |
|         |         |                    |        |      |             |                   | Age-   | standardized      |
| Country | measure | Stroke Type        | sex    | year | Mean        | 95% UI            | Mean   | 95% UI            |
|         |         |                    | Female | 1990 | 2,656       | (1,555 to 3,912)  | 1297.5 | (774.7 to 2051.2) |
|         |         |                    |        | 2013 | 3,928       | (2,269 to 6,765)  | 1030.6 | (578.6 to 1971.3) |
|         |         |                    | Both   | 1990 | 5,375       | (3,478 to 8,097)  | 1186   | (732.2 to 1901.8) |
|         |         |                    |        | 2013 | 7,845       | (4,625 to 12,863) | 996.5  | (562.6 to 1748.5) |
|         | YLDs    | Ischemic Stroke    | Male   | 1990 | 29          | (19 to 42)        | 15.7   | (10.2 to 22.6)    |
|         |         |                    |        | 2013 | 55          | (36 to 77)        | 15.6   | (10.2 to 21.8)    |
|         |         |                    | Female | 1990 | 19          | (12 to 29)        | 11.9   | (7.7 to 17.7)     |
|         |         |                    |        | 2013 | 44          | (28 to 65)        | 12.3   | (8.1 to 17.6)     |
|         |         |                    | Both   | 1990 | 49          | (33 to 69)        | 13.9   | (9.2 to 19.8)     |
|         |         |                    |        | 2013 | 100         | (68 to 138)       | 14     | (9.6 to 18.9)     |
|         |         | Hemorrhagic Stroke | Male   | 1990 | 9           | (6 to 13)         | 4.2    | (2.7 to 6.2)      |
|         |         |                    |        | 2013 | 17          | (11 to 25)        | 4      | (2.6 to 5.9)      |
|         |         |                    | Female | 1990 | 6           | (3 to 8)          | 3      | (1.9 to 4.4)      |
|         |         |                    |        | 2013 | 12          | (7 to 18)         | 2.8    | (1.7 to 4.1)      |

|             |        |                    |        |      |             |                  |        |                   |
|-------------|--------|--------------------|--------|------|-------------|------------------|--------|-------------------|
|             |        |                    | Both   | 1990 | 15          | (10 to 21)       | 3.6    | (2.4 to 5.1)      |
|             |        |                    | Both   | 2013 | 30          | (20 to 42)       | 3.4    | (2.3 to 4.8)      |
| Timor-Leste | Deaths | Ischemic Stroke    | Male   | 1990 | 53          | (25 to 91)       | 69.6   | (33.8 to 112.9)   |
|             |        |                    |        | 2013 | 115         | (55 to 185)      | 82.9   | (43.2 to 126.1)   |
|             |        |                    | Female | 1990 | 54          | (28 to 109)      | 78.9   | (43.7 to 140.4)   |
|             |        |                    |        | 2013 | 138         | (69 to 237)      | 88.9   | (46.4 to 145.6)   |
|             |        |                    | Both   | 1990 | 107         | (68 to 165)      | 74     | (48.0 to 105.8)   |
|             |        |                    |        | 2013 | 254         | (168 to 352)     | 86.5   | (58.8 to 116.1)   |
|             | Deaths | Hemorrhagic Stroke | Male   | 1990 | 86          | (44 to 122)      | 65.7   | (26.1 to 102.6)   |
|             |        |                    |        | 2013 | 120         | (67 to 189)      | 60.3   | (32.0 to 100.5)   |
|             |        |                    | Female | 1990 | 76          | (40 to 113)      | 64.6   | (29.8 to 100.5)   |
|             |        |                    |        | 2013 | 108         | (59 to 172)      | 52.3   | (27.1 to 89.9)    |
|             |        |                    | Both   | 1990 | 163         | (106 to 215)     | 65.1   | (38.4 to 88.6)    |
|             |        |                    |        | 2013 | 229         | (151 to 311)     | 56.2   | (36.0 to 79.5)    |
|             | DALYs  | Ischemic Stroke    | Male   | 1990 | 1,406       | (759 to 2,441)   | 1082.9 | (529.7 to 1834.4) |
|             |        |                    |        | 2013 | 2,252       | (1,052 to 3,793) | 1170.3 | (575.7 to 1883.3) |
|             |        |                    | Female | 1990 | 1,379       | (636 to 3,104)   | 1194.8 | (642.9 to 2308.3) |
|             |        |                    |        | 2013 | 2,373       | (1,163 to 4,392) | 1169.5 | (591.9 to 2024.5) |
|             |        |                    | Both   | 1990 | 2,786       | (1,821 to 4,783) | 1136   | (730.0 to 1705.1) |
|             |        |                    |        | 2013 | 4,626       | (2,995 to 6,749) | 1173.6 | (782.6 to 1641.6) |
|             |        | Hemorrhagic Stroke | Male   | 1990 | 3,483       | (2,024 to 4,870) | 1525.4 | (732.3 to 2179.5) |
|             |        |                    |        | 2013 | 3,781       | (2,378 to 5,516) | 1303.6 | (748.5 to 2001.4) |
|             |        |                    | Female | 1990 | 2,884       | (1,540 to 4,130) | 1445   | (748.7 to 2158.2) |
|             |        |                    |        | 2013 | 2,890       | (1,694 to 4,386) | 1040.1 | (588.5 to 1611.6) |
|             |        |                    | Both   | 1990 | 6,367       | (4,194 to 8,475) | 1485.4 | (949.4 to 1962.3) |
|             |        |                    |        |      | Counts, All | Ages             | Rate   | Per 100,000       |
|             |        |                    |        |      |             |                  | Age-   | standardized      |

| Country | measure | Stroke Type        | sex    | year | Mean  | 95% UI            | Mean   | 95% UI            |
|---------|---------|--------------------|--------|------|-------|-------------------|--------|-------------------|
|         |         |                    |        | 2013 | 6,672 | (4,672 to 8,813)  | 1171   | (787.9 to 1570.3) |
|         | YLDs    | Ischemic Stroke    | Male   | 1990 | 30    | (20 to 43)        | 28.3   | (18.5 to 39.3)    |
|         |         |                    |        | 2013 | 57    | (36 to 82)        | 28.8   | (18.6 to 41.2)    |
|         |         |                    | Female | 1990 | 23    | (14 to 33)        | 22.7   | (14.6 to 32.8)    |
|         |         |                    |        | 2013 | 54    | (35 to 78)        | 25.1   | (16.5 to 36.0)    |
|         |         |                    | Both   | 1990 | 54    | (37 to 75)        | 25.6   | (17.7 to 35.2)    |
|         |         |                    |        | 2013 | 112   | (74 to 157)       | 26.9   | (18.0 to 37.6)    |
|         |         | Hemorrhagic Stroke | Male   | 1990 | 41    | (26 to 58)        | 30.8   | (20.0 to 43.4)    |
|         |         |                    |        | 2013 | 69    | (44 to 98)        | 31.1   | (20.2 to 43.7)    |
|         |         |                    | Female | 1990 | 28    | (18 to 40)        | 22.4   | (14.8 to 31.8)    |
|         |         |                    |        | 2013 | 56    | (36 to 78)        | 23.6   | (15.5 to 33.5)    |
|         |         |                    | Both   | 1990 | 70    | (46 to 95)        | 26.7   | (18.0 to 36.9)    |
|         |         |                    | Both   | 2013 | 125   | (83 to 171)       | 27.2   | (18.1 to 37.4)    |
| Togo    | Deaths  | Ischemic Stroke    | Male   | 1990 | 336   | (224 to 453)      | 72.4   | (48.9 to 95.7)    |
|         |         |                    |        | 2013 | 734   | (330 to 1,031)    | 97.9   | (48.8 to 132.7)   |
|         |         |                    | Female | 1990 | 444   | (281 to 605)      | 80.5   | (53.4 to 112.6)   |
|         |         |                    |        | 2013 | 699   | (338 to 966)      | 83.7   | (43.0 to 111.8)   |
|         |         |                    | Both   | 1990 | 781   | (587 to 951)      | 77.3   | (58.2 to 95.8)    |
|         |         |                    |        | 2013 | 1,433 | (750 to 1,869)    | 90.2   | (49.3 to 114.7)   |
|         | Deaths  | Hemorrhagic Stroke | Male   | 1990 | 378   | (277 to 503)      | 59.2   | (40.9 to 79.9)    |
|         |         |                    |        | 2013 | 578   | (338 to 963)      | 54.3   | (29.6 to 98.9)    |
|         |         |                    | Female | 1990 | 466   | (343 to 656)      | 67     | (47.7 to 97.4)    |
|         |         |                    |        | 2013 | 524   | (342 to 1,003)    | 45.1   | (27.7 to 95.6)    |
|         |         |                    | Both   | 1990 | 845   | (649 to 1,073)    | 63.8   | (47.7 to 85.4)    |
|         |         |                    |        | 2013 | 1,102 | (732 to 1,858)    | 49.3   | (30.6 to 94.1)    |
|         | DALYs   | Ischemic Stroke    | Male   | 1990 | 7,651 | (5,109 to 10,406) | 1160.8 | (777.3 to 1562.9) |

|         |         |                    |        |      |             |                    |        |                   |
|---------|---------|--------------------|--------|------|-------------|--------------------|--------|-------------------|
|         |         |                    |        | 2013 | 15,344      | (6,683 to 22,079)  | 1482.2 | (675.6 to 2070.6) |
|         |         |                    | Female | 1990 | 8,793       | (5,353 to 11,926)  | 1192.7 | (753.6 to 1616.6) |
|         |         |                    |        | 2013 | 12,817      | (5,806 to 18,251)  | 1129.1 | (554.5 to 1553.7) |
|         |         |                    | Both   | 1990 | 16,445      | (12,598 to 20,082) | 1183.8 | (886.5 to 1437.2) |
|         |         |                    |        | 2013 | 28,161      | (13,972 to 37,650) | 1290.3 | (680.0 to 1680.6) |
|         |         | Hemorrhagic Stroke | Male   | 1990 | 12,724      | (9,517 to 16,529)  | 1267.7 | (926.1 to 1689.0) |
|         |         |                    |        | 2013 | 18,324      | (11,552 to 27,261) | 1120.5 | (654.2 to 1888.1) |
|         |         |                    | Female | 1990 | 13,420      | (9,765 to 18,327)  | 1314.4 | (967.9 to 1832.7) |
|         |         |                    |        | 2013 | 14,990      | (10,176 to 25,755) | 859.4  | (562.7 to 1635.6) |
|         |         |                    | Both   | 1990 | 26,145      | (20,502 to 31,784) | 1298.3 | (999.3 to 1653.9) |
|         |         |                    |        | 2013 | 33,314      | (23,523 to 49,677) | 980.8  | (650.1 to 1647.8) |
|         | YLDs    | Ischemic Stroke    | Male   | 1990 | 114         | (69 to 169)        | 14.5   | (8.9 to 21.3)     |
|         |         |                    |        | 2013 | 216         | (139 to 312)       | 15.4   | (9.9 to 22.3)     |
|         |         |                    |        |      | Counts, All | Ages               | Rate   | Per 100,000       |
|         |         |                    |        |      | Mean        | 95% UI             | Age-   | standardized      |
| Country | measure | Stroke Type        | sex    | year | Mean        | 95% UI             | Mean   | 95% UI            |
|         |         |                    | Female | 1990 | 104         | (67 to 155)        | 11.9   | (7.5 to 17.8)     |
|         |         |                    |        | 2013 | 186         | (119 to 259)       | 11.5   | (7.4 to 16.0)     |
|         |         |                    | Both   | 1990 | 219         | (145 to 310)       | 13.1   | (8.5 to 18.6)     |
|         |         |                    |        | 2013 | 403         | (268 to 551)       | 13.3   | (8.9 to 18.2)     |
|         |         | Hemorrhagic Stroke | Male   | 1990 | 37          | (23 to 55)         | 3.9    | (2.5 to 5.9)      |
|         |         |                    |        | 2013 | 66          | (41 to 100)        | 3.9    | (2.4 to 6.0)      |
|         |         |                    | Female | 1990 | 29          | (18 to 44)         | 3      | (1.9 to 4.5)      |
|         |         |                    |        | 2013 | 52          | (32 to 76)         | 2.7    | (1.7 to 3.9)      |
|         |         |                    | Both   | 1990 | 66          | (43 to 95)         | 3.4    | (2.3 to 4.9)      |
|         |         |                    | Both   | 2013 | 119         | (78 to 169)        | 3.2    | (2.1 to 4.6)      |
| Tonga   | Deaths  | Ischemic Stroke    | Male   | 1990 | 8           | (4 to 11)          | 44.9   | (28.4 to 64.7)    |

|  |        |                    |        |      |     |              |        |                   |
|--|--------|--------------------|--------|------|-----|--------------|--------|-------------------|
|  |        |                    |        | 2013 | 12  | (7 to 17)    | 46.9   | (29.8 to 66.6)    |
|  |        |                    | Female | 1990 | 10  | (7 to 13)    | 51.2   | (36.2 to 68.6)    |
|  |        |                    |        | 2013 | 17  | (10 to 24)   | 42.8   | (25.4 to 62.6)    |
|  |        |                    | Both   | 1990 | 18  | (14 to 24)   | 48.6   | (37.1 to 63.0)    |
|  |        |                    |        | 2013 | 29  | (21 to 40)   | 45.1   | (33.0 to 61.9)    |
|  | Deaths | Hemorrhagic Stroke | Male   | 1990 | 12  | (8 to 16)    | 58.8   | (39.0 to 80.1)    |
|  |        |                    |        | 2013 | 16  | (10 to 22)   | 58.9   | (37.5 to 80.7)    |
|  |        |                    | Female | 1990 | 15  | (10 to 21)   | 68     | (48.2 to 93.4)    |
|  |        |                    |        | 2013 | 21  | (14 to 29)   | 54.4   | (36.5 to 76.0)    |
|  |        |                    | Both   | 1990 | 27  | (21 to 34)   | 64.1   | (49.5 to 80.6)    |
|  |        |                    |        | 2013 | 37  | (27 to 47)   | 57.3   | (41.7 to 72.9)    |
|  | DALYs  | Ischemic Stroke    | Male   | 1990 | 148 | (84 to 233)  | 690.5  | (414.0 to 1025.5) |
|  |        |                    |        | 2013 | 205 | (124 to 300) | 722.6  | (446.5 to 1043.0) |
|  |        |                    | Female | 1990 | 165 | (110 to 232) | 705.5  | (492.1 to 963.5)  |
|  |        |                    |        | 2013 | 216 | (126 to 329) | 564.4  | (326.1 to 861.4)  |
|  |        |                    | Both   | 1990 | 313 | (227 to 425) | 701.2  | (526.5 to 928.3)  |
|  |        |                    |        | 2013 | 422 | (303 to 614) | 639.7  | (461.5 to 919.0)  |
|  |        | Hemorrhagic Stroke | Male   | 1990 | 317 | (210 to 436) | 1189.8 | (782.8 to 1635.7) |
|  |        |                    |        | 2013 | 401 | (259 to 560) | 1222.7 | (785.2 to 1688.7) |
|  |        |                    | Female | 1990 | 321 | (225 to 455) | 1190.9 | (853.0 to 1665.0) |
|  |        |                    |        | 2013 | 357 | (242 to 498) | 920.7  | (614.0 to 1291.2) |
|  |        |                    | Both   | 1990 | 638 | (481 to 834) | 1195.9 | (907.3 to 1541.3) |
|  |        |                    |        | 2013 | 759 | (562 to 969) | 1069.6 | (792.0 to 1363.1) |
|  | YLDs   | Ischemic Stroke    | Male   | 1990 | 5   | (3 to 7)     | 24.7   | (15.7 to 35.2)    |
|  |        |                    |        | 2013 | 7   | (4 to 10)    | 26.7   | (17.2 to 38.9)    |
|  |        |                    | Female | 1990 | 4   | (2 to 6)     | 18.9   | (11.5 to 28.1)    |
|  |        |                    |        | 2013 | 7   | (4 to 10)    | 20.5   | (12.7 to 29.6)    |

| Country             | measure | Stroke Type        | sex    | year         | Mean             | 95% UI            | Mean   | 95% UI             |
|---------------------|---------|--------------------|--------|--------------|------------------|-------------------|--------|--------------------|
|                     |         |                    | Both   | 1990         | 10               | (6 to 13)         | 21.6   | (14.4 to 29.8)     |
|                     |         |                    |        |              | Counts, All Ages |                   | Rate   | Per 100,000        |
|                     |         |                    |        |              |                  |                   | Age-   | standardized       |
|                     |         |                    |        | 2013         | 14               | (10 to 20)        | 23.1   | (15.7 to 32.0)     |
|                     |         | Hemorrhagic Stroke | Male   | 1990         | 6                | (4 to 9)          | 29.3   | (19.1 to 41.9)     |
|                     |         |                    |        | 2013         | 9                | (6 to 13)         | 31.6   | (20.2 to 44.4)     |
|                     |         |                    | Female | 1990         | 5                | (3 to 7)          | 20.8   | (13.0 to 30.7)     |
|                     |         |                    |        | 2013         | 8                | (5 to 11)         | 22.1   | (14.2 to 31.7)     |
|                     |         |                    | Both   | 1990         | 12               | (8 to 16)         | 24.7   | (17.0 to 33.9)     |
|                     |         |                    | Both   | 2013         | 17               | (11 to 24)        | 26.2   | (17.6 to 36.1)     |
| Trinidad And Tobago | Deaths  | Ischemic Stroke    | Male   | 1990         | 319              | (258 to 374)      | 111.2  | (89.5 to 131.4)    |
|                     |         |                    |        | 2013         | 449              | (352 to 569)      | 92.2   | (73.4 to 116.5)    |
|                     | Female  | 1990               | 333    | (253 to 383) | 87.7             | (66.8 to 100.1)   |        |                    |
|                     |         |                    |        | 2013         | 395              | (304 to 536)      | 59.7   | (46.1 to 80.5)     |
|                     |         |                    | Both   | 1990         | 653              | (554 to 719)      | 98.1   | (83.3 to 108.0)    |
|                     |         |                    |        | 2013         | 845              | (718 to 1,039)    | 73.7   | (63.1 to 91.5)     |
|                     | Deaths  | Hemorrhagic Stroke | Male   | 1990         | 158              | (128 to 202)      | 48.4   | (38.9 to 63.5)     |
|                     |         |                    |        | 2013         | 266              | (170 to 341)      | 47.7   | (30.3 to 61.8)     |
|                     |         |                    | Female | 1990         | 181              | (149 to 237)      | 44.8   | (36.7 to 58.7)     |
|                     |         |                    |        | 2013         | 227              | (162 to 300)      | 32.8   | (23.3 to 43.0)     |
|                     |         |                    | Both   | 1990         | 339              | (298 to 414)      | 46.4   | (40.4 to 57.6)     |
|                     |         |                    |        | 2013         | 493              | (366 to 586)      | 39.5   | (29.1 to 47.0)     |
|                     | DALYs   | Ischemic Stroke    | Male   | 1990         | 5,881            | (4,786 to 6,864)  | 1774.1 | (1442.8 to 2073.0) |
|                     |         |                    |        | 2013         | 8,322            | (6,529 to 10,689) | 1448.2 | (1149.8 to 1831.2) |
|                     |         |                    | Female | 1990         | 5,204            | (3,960 to 5,899)  | 1282.9 | (981.5 to 1460.1)  |
|                     |         |                    |        | 2013         | 5,621            | (4,356 to 7,632)  | 804.9  | (624.6 to 1094.6)  |

|         |         |                    |        |      |                  |                    |        |                    |
|---------|---------|--------------------|--------|------|------------------|--------------------|--------|--------------------|
|         |         |                    | Both   | 1990 | 11,085           | (9,395 to 12,238)  | 1501.9 | (1275.6 to 1650.5) |
|         |         |                    |        | 2013 | 13,944           | (11,630 to 17,123) | 1092.7 | (920.2 to 1338.6)  |
|         |         | Hemorrhagic Stroke | Male   | 1990 | 3,970            | (3,261 to 4,924)   | 1013.6 | (831.8 to 1259.5)  |
|         |         |                    |        | 2013 | 6,328            | (4,177 to 8,142)   | 975.1  | (645.5 to 1243.5)  |
|         |         |                    | Female | 1990 | 4,211            | (3,471 to 5,303)   | 943.9  | (782.1 to 1199.9)  |
|         |         |                    |        | 2013 | 4,556            | (3,381 to 6,049)   | 624.6  | (461.5 to 823.8)   |
|         |         |                    | Both   | 1990 | 8,181            | (7,249 to 9,680)   | 973    | (859.9 to 1165.1)  |
|         |         |                    |        | 2013 | 10,885           | (8,316 to 13,015)  | 787.2  | (602.1 to 940.4)   |
|         | YLDs    | Ischemic Stroke    | Male   | 1990 | 163              | (106 to 231)       | 49.8   | (32.5 to 71.4)     |
|         |         |                    |        | 2013 | 277              | (174 to 404)       | 47.6   | (29.8 to 70.5)     |
|         |         |                    | Female | 1990 | 130              | (84 to 182)        | 32.3   | (21.2 to 45.5)     |
|         |         |                    |        | 2013 | 232              | (155 to 323)       | 32.9   | (22.1 to 45.9)     |
|         |         |                    | Both   | 1990 | 293              | (193 to 407)       | 40     | (26.5 to 55.5)     |
|         |         |                    |        | 2013 | 509              | (340 to 707)       | 39.6   | (26.4 to 55.0)     |
|         |         | Hemorrhagic Stroke | Male   | 1990 | 59               | (35 to 86)         | 16.1   | (9.5 to 23.9)      |
|         |         |                    |        |      | Counts, All Ages |                    | Rate   | Per 100,000        |
|         |         |                    |        |      |                  |                    | Age-   | standardized       |
| Country | measure | Stroke Type        | sex    | year | Mean             | 95% UI             | Mean   | 95% UI             |
|         |         |                    |        | 2013 | 91               | (56 to 133)        | 14.8   | (9.2 to 22.1)      |
|         |         |                    | Female | 1990 | 44               | (26 to 66)         | 10.3   | (6.2 to 15.7)      |
|         |         |                    |        | 2013 | 79               | (48 to 118)        | 11     | (6.7 to 16.5)      |
|         |         |                    | Both   | 1990 | 103              | (66 to 146)        | 12.9   | (8.3 to 18.2)      |
|         |         |                    | Both   | 2013 | 170              | (111 to 245)       | 12.7   | (8.3 to 18.2)      |
| Tunisia | Deaths  | Ischemic Stroke    | Male   | 1990 | 927              | (681 to 1,232)     | 67.1   | (49.2 to 88.8)     |
|         |         |                    |        | 2013 | 1,735            | (1,140 to 2,523)   | 50.8   | (33.9 to 73.2)     |
|         |         |                    | Female | 1990 | 1,039            | (674 to 1,344)     | 75.6   | (49.8 to 97.4)     |
|         |         |                    |        | 2013 | 2,499            | (1,290 to 3,471)   | 59.6   | (31.0 to 83.0)     |



|  |        |                    |        |      |        |                    |        |                   |
|--|--------|--------------------|--------|------|--------|--------------------|--------|-------------------|
|  |        |                    | Both   | 1990 | 1,967  | (1,498 to 2,405)   | 71.4   | (54.1 to 87.9)    |
|  |        |                    |        | 2013 | 4,234  | (2,802 to 5,429)   | 55.8   | (36.8 to 71.9)    |
|  | Deaths | Hemorrhagic Stroke | Male   | 1990 | 865    | (634 to 1,190)     | 49.4   | (34.9 to 68.9)    |
|  |        |                    |        | 2013 | 1,368  | (837 to 2,141)     | 36.4   | (21.9 to 57.4)    |
|  |        |                    | Female | 1990 | 1,108  | (769 to 1,454)     | 64.7   | (43.6 to 88.6)    |
|  |        |                    |        | 2013 | 1,967  | (1,146 to 2,719)   | 44.8   | (25.9 to 62.8)    |
|  |        |                    | Both   | 1990 | 1,974  | (1,571 to 2,494)   | 57.2   | (44.2 to 74.4)    |
|  |        |                    |        | 2013 | 3,336  | (2,214 to 4,488)   | 41.2   | (26.8 to 55.6)    |
|  | DALYs  | Ischemic Stroke    | Male   | 1990 | 16,321 | (11,580 to 22,665) | 886.6  | (647.2 to 1180.5) |
|  |        |                    |        | 2013 | 24,519 | (15,641 to 36,844) | 632.8  | (408.7 to 929.5)  |
|  |        |                    | Female | 1990 | 17,362 | (10,492 to 23,118) | 951.5  | (609.0 to 1233.8) |
|  |        |                    |        | 2013 | 29,870 | (14,707 to 42,811) | 664.8  | (332.5 to 953.2)  |
|  |        |                    | Both   | 1990 | 33,684 | (24,930 to 42,830) | 919.4  | (702.6 to 1130.7) |
|  |        |                    |        | 2013 | 54,390 | (35,319 to 72,353) | 651.5  | (428.1 to 857.4)  |
|  |        | Hemorrhagic Stroke | Male   | 1990 | 24,379 | (17,791 to 34,050) | 926.1  | (679.8 to 1278.6) |
|  |        |                    |        | 2013 | 26,999 | (17,359 to 41,175) | 606.7  | (383.4 to 935.5)  |
|  |        |                    | Female | 1990 | 29,574 | (20,059 to 38,940) | 1154.9 | (810.6 to 1519.2) |
|  |        |                    |        | 2013 | 32,883 | (19,525 to 46,944) | 676.7  | (396.3 to 954.8)  |
|  |        |                    | Both   | 1990 | 53,954 | (42,614 to 67,529) | 1040.9 | (835.9 to 1302.1) |
|  |        |                    |        | 2013 | 59,882 | (42,085 to 80,163) | 645.1  | (445.9 to 862.8)  |
|  | YLDs   | Ischemic Stroke    | Male   | 1990 | 268    | (172 to 379)       | 11.9   | (7.8 to 16.8)     |
|  |        |                    |        | 2013 | 456    | (298 to 668)       | 9.7    | (6.4 to 14.2)     |
|  |        |                    | Female | 1990 | 206    | (130 to 294)       | 9.3    | (5.9 to 13.3)     |
|  |        |                    |        | 2013 | 386    | (250 to 560)       | 7.6    | (4.9 to 11.0)     |
|  |        |                    | Both   | 1990 | 474    | (314 to 635)       | 10.6   | (7.1 to 14.2)     |
|  |        |                    |        | 2013 | 842    | (567 to 1,191)     | 8.6    | (5.8 to 12.2)     |
|  |        | Hemorrhagic        | Male   | 1990 | 36     | (20 to 55)         | 1.4    | (0.8 to 2.2)      |

|         |         | Stroke             |        |      |             |                      |        |                   |
|---------|---------|--------------------|--------|------|-------------|----------------------|--------|-------------------|
|         |         |                    |        | 2013 | 65          | (36 to 102)          | 1.3    | (0.8 to 2.1)      |
|         |         |                    | Female | 1990 | 41          | (24 to 63)           | 1.7    | (1.0 to 2.6)      |
|         |         |                    |        | 2013 | 75          | (43 to 117)          | 1.4    | (0.8 to 2.2)      |
|         |         |                    |        |      | Counts, All | Ages                 | Rate   | Per 100,000       |
|         |         |                    |        |      | Mean        | 95% UI               | Age-   | standardized      |
| Country | measure | Stroke Type        | sex    | year | Mean        | 95% UI               | Mean   | 95% UI            |
|         |         |                    | Both   | 1990 | 78          | (49 to 112)          | 1.6    | (1.0 to 2.3)      |
|         |         |                    | Both   | 2013 | 141         | (89 to 207)          | 1.4    | (0.9 to 2.0)      |
| Turkey  | Deaths  | Ischemic Stroke    | Male   | 1990 | 8,293       | (6,472 to 10,703)    | 91.4   | (69.7 to 117.2)   |
|         |         |                    |        | 2013 | 9,935       | (7,763 to 13,088)    | 49.3   | (38.5 to 64.2)    |
|         |         |                    | Female | 1990 | 9,414       | (7,374 to 12,779)    | 70.5   | (54.6 to 95.2)    |
|         |         |                    |        | 2013 | 15,381      | (11,484 to 18,592)   | 49.2   | (36.5 to 59.6)    |
|         |         |                    | Both   | 1990 | 17,707      | (14,915 to 22,186)   | 78.9   | (66.3 to 98.0)    |
|         |         |                    |        | 2013 | 25,317      | (21,024 to 29,574)   | 49.5   | (41.2 to 58.0)    |
|         | Deaths  | Hemorrhagic Stroke | Male   | 1990 | 8,975       | (6,969 to 11,274)    | 71     | (52.3 to 90.8)    |
|         |         |                    |        | 2013 | 8,433       | (6,465 to 11,106)    | 36.1   | (27.1 to 47.7)    |
|         |         |                    | Female | 1990 | 9,283       | (7,261 to 13,405)    | 59.3   | (46.0 to 84.6)    |
|         |         |                    |        | 2013 | 11,227      | (8,274 to 13,846)    | 34.5   | (25.4 to 42.7)    |
|         |         |                    | Both   | 1990 | 18,258      | (15,472 to 22,493)   | 64.4   | (54.1 to 80.8)    |
|         |         |                    |        | 2013 | 19,661      | (16,170 to 23,318)   | 35.2   | (28.9 to 42.0)    |
|         | DALYs   | Ischemic Stroke    | Male   | 1990 | 141,289     | (108,392 to 189,194) | 1208.6 | (948.1 to 1572.6) |
|         |         |                    |        | 2013 | 137,842     | (106,597 to 182,213) | 584.9  | (455.4 to 767.6)  |
|         |         |                    | Female | 1990 | 128,634     | (98,100 to 178,884)  | 858.5  | (673.0 to 1179.6) |
|         |         |                    |        | 2013 | 168,681     | (121,721 to 200,287) | 522.5  | (378.2 to 620.0)  |

|         |         |                    | Both   | 1990 | 269,924          | (219,167 to 347,697) | 1008.9 | (839.2 to 1285.3)  |
|---------|---------|--------------------|--------|------|------------------|----------------------|--------|--------------------|
|         |         |                    |        | 2013 | 306,524          | (249,081 to 359,412) | 549.6  | (452.0 to 642.4)   |
|         |         | Hemorrhagic Stroke | Male   | 1990 | 281,665          | (222,565 to 358,407) | 1497.6 | (1167.3 to 1887.8) |
|         |         |                    |        | 2013 | 185,394          | (140,576 to 241,913) | 640.1  | (491.1 to 827.6)   |
|         |         |                    | Female | 1990 | 239,405          | (175,024 to 358,375) | 1183.7 | (908.7 to 1735.9)  |
|         |         |                    |        | 2013 | 198,728          | (146,252 to 244,414) | 572.4  | (421.8 to 697.7)   |
|         |         |                    | Both   | 1990 | 521,070          | (431,267 to 653,383) | 1331   | (1116.1 to 1663.1) |
|         |         |                    |        | 2013 | 384,123          | (318,762 to 451,635) | 603.4  | (499.9 to 709.5)   |
|         | YLDs    | Ischemic Stroke    | Male   | 1990 | 1,539            | (977 to 2,232)       | 10     | (6.4 to 14.4)      |
|         |         |                    |        | 2013 | 2,839            | (1,750 to 3,953)     | 9.7    | (6.0 to 13.5)      |
|         |         |                    | Female | 1990 | 1,273            | (789 to 1,856)       | 7.4    | (4.6 to 10.6)      |
|         |         |                    |        | 2013 | 2,534            | (1,621 to 3,672)     | 7.2    | (4.6 to 10.4)      |
|         |         |                    | Both   | 1990 | 2,813            | (1,832 to 3,999)     | 8.6    | (5.7 to 12.1)      |
|         |         |                    |        | 2013 | 5,373            | (3,586 to 7,389)     | 8.3    | (5.6 to 11.5)      |
|         |         |                    |        |      | Counts, All Ages |                      | Rate   | Per 100,000        |
|         |         |                    |        |      |                  |                      | Age-   | standardized       |
| Country | measure | Stroke Type        | sex    | year | Mean             | 95% UI               | Mean   | 95% UI             |
|         |         | Hemorrhagic Stroke | Male   | 1990 | 265              | (148 to 415)         | 1.6    | (0.9 to 2.5)       |
|         |         |                    |        | 2013 | 458              | (286 to 710)         | 1.5    | (0.9 to 2.2)       |
|         |         |                    | Female | 1990 | 305              | (179 to 448)         | 1.7    | (1.0 to 2.5)       |
|         |         |                    |        | 2013 | 511              | (285 to 766)         | 1.4    | (0.8 to 2.1)       |
|         |         |                    | Both   | 1990 | 570              | (362 to 824)         | 1.6    | (1.0 to 2.3)       |

|              |        |                    |        |      |         |                     |        |                    |
|--------------|--------|--------------------|--------|------|---------|---------------------|--------|--------------------|
|              |        |                    | Both   | 2013 | 969     | (595 to 1,391)      | 1.5    | (0.9 to 2.1)       |
| Turkmenistan | Deaths | Ischemic Stroke    | Male   | 1990 | 57      | (44 to 79)          | 9.7    | (7.3 to 13.2)      |
|              |        |                    |        | 2013 | 106     | (64 to 173)         | 9.9    | (5.9 to 15.8)      |
|              |        |                    | Female | 1990 | 63      | (50 to 84)          | 6.7    | (5.3 to 9.1)       |
|              |        |                    |        | 2013 | 92      | (59 to 140)         | 6.1    | (3.9 to 9.3)       |
|              |        |                    | Both   | 1990 | 121     | (102 to 155)        | 7.8    | (6.6 to 10.2)      |
|              |        |                    |        | 2013 | 198     | (142 to 276)        | 7.6    | (5.5 to 10.5)      |
|              | Deaths | Hemorrhagic Stroke | Male   | 1990 | 1,228   | (1,063 to 1,437)    | 194.5  | (167.3 to 227.4)   |
|              |        |                    |        | 2013 | 2,246   | (1,684 to 3,040)    | 196.6  | (152.3 to 258.6)   |
|              |        |                    | Female | 1990 | 1,494   | (1,334 to 1,772)    | 160    | (143.9 to 191.0)   |
|              |        |                    |        | 2013 | 2,136   | (1,686 to 2,922)    | 142.1  | (113.2 to 192.0)   |
|              |        |                    | Both   | 1990 | 2,723   | (2,510 to 3,035)    | 174.1  | (160.2 to 195.4)   |
|              |        |                    |        | 2013 | 4,382   | (3,612 to 5,447)    | 166.1  | (139.7 to 203.3)   |
|              | DALYs  | Ischemic Stroke    | Male   | 1990 | 1,471   | (1,109 to 2,053)    | 184.1  | (140.6 to 250.8)   |
|              |        |                    |        | 2013 | 2,663   | (1,634 to 4,315)    | 185.1  | (114.2 to 298.5)   |
|              |        |                    | Female | 1990 | 1,428   | (1,125 to 1,865)    | 131.9  | (105.5 to 171.5)   |
|              |        |                    |        | 2013 | 1,961   | (1,296 to 3,022)    | 110    | (73.5 to 169.9)    |
|              |        |                    | Both   | 1990 | 2,900   | (2,474 to 3,694)    | 152.5  | (129.9 to 191.6)   |
|              |        |                    |        | 2013 | 4,624   | (3,381 to 6,437)    | 142.4  | (104.2 to 196.6)   |
|              |        | Hemorrhagic Stroke | Male   | 1990 | 31,672  | (27,254 to 37,129)  | 3826.6 | (3294.5 to 4469.0) |
|              |        |                    |        | 2013 | 57,246  | (41,173 to 78,434)  | 3831.2 | (2841.2 to 5217.9) |
|              |        |                    | Female | 1990 | 31,683  | (27,521 to 37,144)  | 2939.4 | (2569.4 to 3446.2) |
|              |        |                    |        | 2013 | 43,151  | (32,369 to 60,177)  | 2433   | (1880.1 to 3368.2) |
|              |        |                    | Both   | 1990 | 63,356  | (57,588 to 70,765)  | 3315.5 | (3033.1 to 3683.5) |
|              |        |                    |        | 2013 | 100,397 | (80,065 to 127,459) | 3060.1 | (2484.9 to 3860.3) |
|              | YLDs   | Ischemic Stroke    | Male   | 1990 | 56      | (36 to 83)          | 7.2    | (4.6 to 10.6)      |

|         |         |                    |        | 2013 | 107         | (68 to 151)       | 7.2   | (4.6 to 10.3)     |
|---------|---------|--------------------|--------|------|-------------|-------------------|-------|-------------------|
|         |         |                    | Female | 1990 | 70          | (44 to 102)       | 6.8   | (4.3 to 9.9)      |
|         |         |                    |        | 2013 | 114         | (70 to 169)       | 6.4   | (3.9 to 9.6)      |
|         |         |                    | Both   | 1990 | 127         | (85 to 180)       | 7     | (4.7 to 9.8)      |
|         |         |                    |        | 2013 | 222         | (144 to 313)      | 6.8   | (4.4 to 9.6)      |
|         |         | Hemorrhagic Stroke | Male   | 1990 | 89          | (57 to 127)       | 9.4   | (6.1 to 13.2)     |
|         |         |                    |        | 2013 | 157         | (97 to 231)       | 8.8   | (5.6 to 12.9)     |
|         |         |                    |        |      | Counts, All | Ages              | Rate  | Per 100,000       |
|         |         |                    |        |      |             |                   | Age-  | standardized      |
| Country | measure | Stroke Type        | sex    | year | Mean        | 95% UI            | Mean  | 95% UI            |
|         |         |                    | Female | 1990 | 62          | (39 to 92)        | 5.5   | (3.4 to 8.2)      |
|         |         |                    |        | 2013 | 107         | (65 to 161)       | 5.4   | (3.2 to 8.1)      |
|         |         |                    | Both   | 1990 | 152         | (100 to 211)      | 7.2   | (4.8 to 10.0)     |
|         |         |                    | Both   | 2013 | 264         | (172 to 374)      | 6.9   | (4.5 to 9.9)      |
| Uganda  | Deaths  | Ischemic Stroke    | Male   | 1990 | 1,007       | (187 to 1,745)    | 52.4  | (9.6 to 89.7)     |
|         |         |                    |        | 2013 | 1,790       | (641 to 2,755)    | 46.6  | (17.1 to 69.9)    |
|         |         |                    | Female | 1990 | 1,496       | (262 to 2,400)    | 69.6  | (12.9 to 110.0)   |
|         |         |                    |        | 2013 | 2,752       | (808 to 4,137)    | 63.1  | (19.2 to 94.6)    |
|         |         |                    | Both   | 1990 | 2,504       | (587 to 3,837)    | 62.1  | (15.1 to 94.6)    |
|         |         |                    |        | 2013 | 4,543       | (1,749 to 6,467)  | 55.9  | (21.9 to 78.7)    |
|         | Deaths  | Hemorrhagic Stroke | Male   | 1990 | 1,941       | (1,324 to 2,803)  | 74.2  | (48.9 to 113.5)   |
|         |         |                    |        | 2013 | 2,572       | (1,762 to 3,982)  | 53    | (35.4 to 86.6)    |
|         |         |                    | Female | 1990 | 2,640       | (1,220 to 3,638)  | 96.4  | (42.7 to 143.4)   |
|         |         |                    |        | 2013 | 3,455       | (1,886 to 5,478)  | 67.4  | (35.3 to 111.7)   |
|         |         |                    | Both   | 1990 | 4,582       | (2,930 to 6,124)  | 86.6  | (53.0 to 123.5)   |
|         |         |                    |        | 2013 | 6,028       | (4,201 to 9,046)  | 61    | (41.1 to 96.9)    |
|         | DALYs   | Ischemic Stroke    | Male   | 1990 | 20,531      | (4,306 to 36,113) | 792.1 | (156.3 to 1365.1) |

|                  |         |                    |        |      |         |                      |        |                    |             |
|------------------|---------|--------------------|--------|------|---------|----------------------|--------|--------------------|-------------|
|                  |         |                    |        | 2013 | 32,092  | (11,643 to 50,660)   | 670.7  | (240.5 to 1035.6)  |             |
|                  |         |                    | Female | 1990 | 25,999  | (4,420 to 43,465)    | 967.4  | (173.5 to 1559.8)  |             |
|                  |         |                    |        | 2013 | 41,215  | (11,914 to 63,228)   | 817.4  | (236.9 to 1234.9)  |             |
|                  |         |                    | Both   | 1990 | 46,530  | (11,390 to 72,178)   | 891.3  | (216.0 to 1362.6)  |             |
|                  |         |                    |        | 2013 | 73,308  | (28,608 to 105,973)  | 753.6  | (296.0 to 1077.5)  |             |
|                  |         | Hemorrhagic Stroke | Male   | 1990 | 55,475  | (38,379 to 78,116)   | 1536   | (1044.1 to 2216.0) |             |
|                  |         |                    |        | 2013 | 65,860  | (45,695 to 97,623)   | 1006.7 | (689.7 to 1555.6)  |             |
|                  |         |                    | Female | 1990 | 64,329  | (30,725 to 84,771)   | 1802.7 | (832.3 to 2475.6)  |             |
|                  |         |                    |        | 2013 | 75,620  | (42,658 to 112,292)  | 1157.7 | (639.3 to 1758.5)  |             |
|                  |         |                    | Both   | 1990 | 119,805 | (80,354 to 155,793)  | 1684.8 | (1077.5 to 2238.5) |             |
|                  |         |                    |        | 2013 | 141,480 | (101,863 to 196,734) | 1090.6 | (770.6 to 1595.8)  |             |
|                  | YLDs    | Ischemic Stroke    | Male   | 1990 | 366     | (236 to 527)         | 10.1   | (6.4 to 14.6)      |             |
|                  |         |                    |        | 2013 | 751     | (479 to 1,113)       | 10.7   | (6.8 to 16.1)      |             |
|                  |         |                    | Female | 1990 | 278     | (175 to 397)         | 7.3    | (4.6 to 10.5)      |             |
|                  |         |                    |        | 2013 | 542     | (347 to 815)         | 7.2    | (4.6 to 10.9)      |             |
|                  |         |                    | Both   | 1990 | 645     | (432 to 897)         | 8.6    | (5.8 to 12.0)      |             |
|                  |         |                    |        | 2013 | 1,293   | (844 to 1,847)       | 8.9    | (5.8 to 12.7)      |             |
|                  |         | Hemorrhagic Stroke | Male   | 1990 | 131     | (78 to 196)          | 3      | (1.8 to 4.3)       |             |
|                  |         |                    |        | 2013 | 280     | (174 to 430)         | 3.1    | (1.9 to 4.7)       |             |
| Counts, All Ages |         |                    |        |      |         |                      |        | Rate               | Per 100,000 |
| Country          | measure | Stroke Type        | sex    | year | Mean    | 95% UI               | Mean   | 95% UI             |             |
|                  |         |                    | Female | 1990 | 86      | (51 to 130)          | 1.9    | (1.2 to 2.8)       |             |
|                  |         |                    |        | 2013 | 175     | (104 to 261)         | 1.9    | (1.2 to 2.8)       |             |

|         |        |                    |        |      |           |                        |        |                    |
|---------|--------|--------------------|--------|------|-----------|------------------------|--------|--------------------|
|         |        |                    | Both   | 1990 | 217       | (138 to 311)           | 2.4    | (1.5 to 3.4)       |
|         |        |                    | Both   | 2013 | 455       | (288 to 665)           | 2.5    | (1.6 to 3.6)       |
| Ukraine | Deaths | Ischemic Stroke    | Male   | 1990 | 26,657    | (21,127 to 31,815)     | 148.4  | (117.5 to 175.0)   |
|         |        |                    |        | 2013 | 32,153    | (26,584 to 38,997)     | 128.7  | (106.7 to 154.5)   |
|         |        |                    | Female | 1990 | 58,127    | (44,220 to 66,563)     | 133.7  | (102.1 to 153.4)   |
|         |        |                    |        | 2013 | 50,499    | (43,308 to 63,804)     | 92.5   | (79.3 to 117.7)    |
|         |        |                    | Both   | 1990 | 84,784    | (69,711 to 95,779)     | 139.5  | (115.0 to 157.5)   |
|         |        |                    |        | 2013 | 82,652    | (73,718 to 96,167)     | 105.9  | (94.1 to 123.7)    |
|         | Deaths | Hemorrhagic Stroke | Male   | 1990 | 12,355    | (8,358 to 16,377)      | 57.3   | (38.1 to 76.1)     |
|         |        |                    |        | 2013 | 12,344    | (8,365 to 17,382)      | 48     | (32.2 to 68.5)     |
|         |        |                    | Female | 1990 | 21,120    | (13,628 to 25,730)     | 50.4   | (33.0 to 61.5)     |
|         |        |                    |        | 2013 | 15,364    | (11,634 to 24,582)     | 32.3   | (25.0 to 50.0)     |
|         |        |                    | Both   | 1990 | 33,475    | (23,908 to 40,061)     | 53.6   | (38.3 to 64.3)     |
|         |        |                    |        | 2013 | 27,708    | (21,692 to 39,950)     | 38.8   | (30.4 to 54.9)     |
|         | DALYs  | Ischemic Stroke    | Male   | 1990 | 447,765   | (352,678 to 550,844)   | 2163.5 | (1722.4 to 2616.7) |
|         |        |                    |        | 2013 | 512,002   | (418,968 to 623,398)   | 1953.4 | (1615.1 to 2356.7) |
|         |        |                    | Female | 1990 | 724,691   | (552,224 to 847,016)   | 1681.6 | (1280.6 to 1972.1) |
|         |        |                    |        | 2013 | 578,674   | (500,777 to 727,450)   | 1139.7 | (973.6 to 1429.9)  |
|         |        |                    | Both   | 1990 | 1,172,456 | (973,550 to 1,362,689) | 1865.6 | (1560.6 to 2163.2) |
|         |        |                    |        | 2013 | 1,090,677 | (968,704 to 1,266,969) | 1452.4 | (1290.2 to 1688.9) |
|         |        | Hemorrhagic Stroke | Male   | 1990 | 295,846   | (205,699 to 384,231)   | 1216.7 | (848.3 to 1588.5)  |
|         |        |                    |        | 2013 | 285,091   | (198,637 to            | 1082.5 | (762.8 to 1482.3)  |

|                      |         |                    |        |      |             |                      |        |                   |
|----------------------|---------|--------------------|--------|------|-------------|----------------------|--------|-------------------|
|                      |         |                    |        |      |             | 387,814)             |        |                   |
|                      |         |                    | Female | 1990 | 376,371     | (253,841 to 449,182) | 951.5  | (656.3 to 1125.9) |
|                      |         |                    |        | 2013 | 257,577     | (203,614 to 384,362) | 623.3  | (503.0 to 905.9)  |
|                      |         |                    | Both   | 1990 | 672,217     | (501,096 to 799,148) | 1067.8 | (803.2 to 1266.6) |
|                      |         |                    |        | 2013 | 542,669     | (434,914 to 733,023) | 820.3  | (660.8 to 1078.8) |
|                      | YLDs    | Ischemic Stroke    | Male   | 1990 | 11,221      | (7,497 to 15,929)    | 46.7   | (31.6 to 65.0)    |
|                      |         |                    |        | 2013 | 13,848      | (9,129 to 19,470)    | 52.7   | (34.5 to 73.8)    |
|                      |         |                    | Female | 1990 | 11,159      | (7,446 to 15,623)    | 29.2   | (19.5 to 40.4)    |
|                      |         |                    |        | 2013 | 11,456      | (7,707 to 16,206)    | 28     | (18.5 to 39.4)    |
|                      |         |                    |        |      | Counts, All | Ages                 | Rate   | Per 100,000       |
|                      |         |                    |        |      |             |                      | Age-   | standardized      |
| Country              | measure | Stroke Type        | sex    | year | Mean        | 95% UI               | Mean   | 95% UI            |
|                      |         |                    | Both   | 1990 | 22,380      | (15,114 to 30,441)   | 36.2   | (24.5 to 49.0)    |
|                      |         |                    |        | 2013 | 25,305      | (17,532 to 34,184)   | 38.1   | (26.4 to 51.5)    |
|                      |         | Hemorrhagic Stroke | Male   | 1990 | 691         | (379 to 1,199)       | 2.8    | (1.5 to 4.7)      |
|                      |         |                    |        | 2013 | 723         | (371 to 1,338)       | 2.8    | (1.5 to 5.0)      |
|                      |         |                    | Female | 1990 | 709         | (378 to 1,207)       | 2      | (1.1 to 3.4)      |
|                      |         |                    |        | 2013 | 677         | (390 to 1,095)       | 1.9    | (1.1 to 3.0)      |
|                      |         |                    | Both   | 1990 | 1,401       | (831 to 2,179)       | 2.3    | (1.4 to 3.6)      |
|                      |         |                    | Both   | 2013 | 1,401       | (835 to 2,113)       | 2.3    | (1.4 to 3.4)      |
| United Arab Emirates | Deaths  | Ischemic Stroke    | Male   | 1990 | 120         | (72 to 199)          | 85.6   | (56.2 to 130.5)   |
|                      |         |                    |        | 2013 | 217         | (121 to 334)         | 65.1   | (39.7 to 90.7)    |
|                      |         |                    | Female | 1990 | 100         | (44 to 146)          | 101.8  | (47.5 to 145.5)   |
|                      |         |                    |        | 2013 | 97          | (38 to 147)          | 63.3   | (28.2 to 91.4)    |
|                      |         |                    | Both   | 1990 | 220         | (137 to 300)         | 93.9   | (59.7 to 121.5)   |





| Country        | measure | Stroke Type        | sex    | year    | Age- standardized    |                      |                  |                  |
|----------------|---------|--------------------|--------|---------|----------------------|----------------------|------------------|------------------|
|                |         |                    |        |         | Mean                 | 95% UI               | Mean             | 95% UI           |
|                |         | Hemorrhagic Stroke | Male   | 1990    | 9                    | (5 to 15)            | 1.2              | (0.7 to 1.8)     |
|                |         |                    |        | 2013    | 49                   | (24 to 83)           | 1.3              | (0.7 to 2.0)     |
|                |         |                    | Female | 1990    | 3                    | (1 to 5)             | 1.2              | (0.7 to 2.1)     |
|                |         |                    |        | 2013    | 18                   | (9 to 30)            | 1.3              | (0.8 to 2.2)     |
|                |         |                    | Both   | 1990    | 12                   | (7 to 19)            | 1.2              | (0.7 to 1.8)     |
|                |         |                    | Both   | 2013    | 67                   | (39 to 106)          | 1.3              | (0.8 to 1.9)     |
| United Kingdom | Deaths  | Ischemic Stroke    | Male   | 1990    | 17,411               | (14,055 to 21,066)   | 54.6             | (44.0 to 65.8)   |
|                |         |                    |        | 2013    | 13,099               | (9,601 to 16,846)    | 25.7             | (18.9 to 33.0)   |
|                |         |                    | Female | 1990    | 31,017               | (22,969 to 34,287)   | 50.7             | (37.4 to 56.0)   |
|                |         |                    |        | 2013    | 21,170               | (18,009 to 28,522)   | 26.9             | (23.0 to 36.5)   |
|                |         |                    | Both   | 1990    | 48,429               | (39,939 to 53,162)   | 52.9             | (43.6 to 58.1)   |
|                |         |                    |        | 2013    | 34,269               | (29,644 to 42,655)   | 26.7             | (23.1 to 33.1)   |
|                | Deaths  | Hemorrhagic Stroke | Male   | 1990    | 10,428               | (8,380 to 13,716)    | 32               | (25.7 to 41.9)   |
|                |         |                    | 2013   | 9,102   | (5,552 to 12,013)    | 18.7                 | (11.6 to 24.4)   |                  |
|                |         |                    | Female | 1990    | 17,079               | (13,066 to 21,248)   | 31.6             | (24.5 to 39.4)   |
|                |         |                    |        | 2013    | 13,773               | (9,921 to 17,873)    | 19.5             | (14.4 to 25.2)   |
|                |         |                    | Both   | 1990    | 27,508               | (23,766 to 33,273)   | 32.1             | (27.9 to 38.7)   |
|                |         |                    |        | 2013    | 22,876               | (17,286 to 26,965)   | 19.3             | (14.8 to 22.7)   |
|                | DALYs   | Ischemic Stroke    | Male   | 1990    | 256,351              | (210,272 to 307,474) | 766.5            | (627.4 to 918.3) |
|                |         |                    | 2013   | 175,279 | (136,249 to 215,136) | 364.5                | (284.0 to 446.5) |                  |
|                |         |                    | Female | 1990    | 329,188              | (248,692 to 362,174) | 596.5            | (451.9 to 661.6) |
|                |         |                    |        | 2013    | 197,881              | (169,184 to 256,980) | 296.2            | (252.2 to 385.5) |

|         |         |                    |        |      |             |                      |       |                  |
|---------|---------|--------------------|--------|------|-------------|----------------------|-------|------------------|
|         |         |                    | Both   | 1990 | 585,540     | (496,562 to 645,218) | 672   | (573.2 to 742.0) |
|         |         |                    |        | 2013 | 373,161     | (321,750 to 447,585) | 329.7 | (281.7 to 393.1) |
|         |         | Hemorrhagic Stroke | Male   | 1990 | 193,014     | (158,263 to 245,458) | 584.9 | (480.1 to 740.1) |
|         |         |                    |        | 2013 | 136,343     | (93,344 to 170,874)  | 305.3 | (212.0 to 378.9) |
|         |         |                    | Female | 1990 | 238,120     | (187,586 to 294,320) | 532.3 | (428.2 to 661.0) |
|         |         |                    |        | 2013 | 153,476     | (121,176 to 193,959) | 276.4 | (224.3 to 347.6) |
|         |         |                    | Both   | 1990 | 431,135     | (382,222 to 515,658) | 556.5 | (494.8 to 662.9) |
|         |         |                    |        | 2013 | 289,820     | (231,307 to 331,741) | 291   | (235.7 to 331.9) |
|         | YLDs    | Ischemic Stroke    | Male   | 1990 | 28,636      | (19,631 to 38,572)   | 84.8  | (58.3 to 114.0)  |
|         |         |                    |        |      | Counts, All | Ages                 | Rate  | Per 100,000      |
|         |         |                    |        |      |             |                      | Age-  | standardized     |
| Country | measure | Stroke Type        | sex    | year | Mean        | 95% UI               | Mean  | 95% UI           |
|         |         |                    |        | 2013 | 45,284      | (31,590 to 59,273)   | 98.1  | (68.4 to 128.3)  |
|         |         |                    | Female | 1990 | 30,037      | (21,126 to 40,006)   | 62.6  | (43.7 to 83.5)   |
|         |         |                    |        | 2013 | 38,473      | (27,208 to 50,704)   | 68.2  | (48.1 to 89.9)   |
|         |         |                    | Both   | 1990 | 58,674      | (40,972 to 78,169)   | 72.2  | (50.3 to 96.3)   |
|         |         |                    |        | 2013 | 83,757      | (58,977 to 110,025)  | 82.2  | (57.9 to 108.3)  |
|         |         | Hemorrhagic Stroke | Male   | 1990 | 6,356       | (4,445 to 8,526)     | 19.2  | (13.4 to 25.7)   |
|         |         |                    |        | 2013 | 9,635       | (6,604 to 12,967)    | 21.6  | (14.8 to 29.2)   |
|         |         |                    | Female | 1990 | 6,224       | (4,223 to 8,652)     | 14.1  | (9.6 to 19.4)    |
|         |         |                    |        | 2013 | 8,086       | (5,489 to 10,976)    | 15.7  | (10.7 to 21.2)   |

|               |        |                    |        |      |           |                          |       |                  |
|---------------|--------|--------------------|--------|------|-----------|--------------------------|-------|------------------|
|               |        |                    | Both   | 1990 | 12,580    | (8,733 to 16,714)        | 16.3  | (11.3 to 21.7)   |
|               |        |                    | Both   | 2013 | 17,722    | (12,330 to 23,550)       | 18.4  | (12.8 to 24.4)   |
| United States | Deaths | Ischemic Stroke    | Male   | 1990 | 34,042    | (26,947 to 43,130)       | 30.4  | (24.0 to 38.6)   |
|               |        |                    |        | 2013 | 34,261    | (24,840 to 44,793)       | 17.4  | (12.7 to 22.7)   |
|               |        |                    | Female | 1990 | 51,546    | (39,805 to 66,103)       | 25.7  | (19.9 to 32.9)   |
|               |        |                    |        | 2013 | 52,552    | (38,834 to 74,671)       | 17.2  | (12.8 to 24.0)   |
|               |        |                    | Both   | 1990 | 85,588    | (72,854 to 102,433)      | 27.7  | (23.6 to 33.2)   |
|               |        |                    |        | 2013 | 86,814    | (70,233 to 110,540)      | 17.5  | (14.2 to 22.0)   |
|               | Deaths | Hemorrhagic Stroke | Male   | 1990 | 27,563    | (21,808 to 35,788)       | 23.7  | (18.7 to 30.9)   |
|               |        |                    |        | 2013 | 33,966    | (22,876 to 43,736)       | 17.3  | (11.8 to 22.3)   |
|               |        |                    | Female | 1990 | 36,584    | (29,748 to 49,687)       | 20.5  | (17.0 to 27.8)   |
|               |        |                    |        | 2013 | 43,452    | (29,990 to 57,032)       | 15.9  | (11.4 to 20.3)   |
|               |        |                    | Both   | 1990 | 64,148    | (56,359 to 81,232)       | 21.9  | (19.2 to 27.5)   |
|               |        |                    |        | 2013 | 77,418    | (56,812 to 92,237)       | 16.6  | (12.3 to 19.6)   |
|               | DALYs  | Ischemic Stroke    | Male   | 1990 | 614,425   | (506,353 to 754,159)     | 520.3 | (428.7 to 639.6) |
|               |        |                    |        | 2013 | 729,573   | (580,591 to 888,987)     | 375.7 | (299.7 to 457.8) |
|               |        |                    | Female | 1990 | 678,586   | (555,553 to 826,290)     | 376.7 | (310.7 to 459.8) |
|               |        |                    |        | 2013 | 812,046   | (648,311 to 1,013,324)   | 325.2 | (260.3 to 404.4) |
|               |        |                    | Both   | 1990 | 1,293,011 | (1,125,068 to 1,507,585) | 437.6 | (379.7 to 511.4) |
|               |        |                    |        | 2013 | 1,541,619 | (1,272,995 to 1,854,470) | 348.5 | (287.0 to 421.9) |
|               |        | Hemorrhagic Stroke | Male   | 1990 | 584,795   | (482,248 to 727,997)     | 482   | (397.0 to 601.6) |

|                  |         |                    |        |      |           |                          |                                      |                                       |
|------------------|---------|--------------------|--------|------|-----------|--------------------------|--------------------------------------|---------------------------------------|
|                  |         |                    |        | 2013 | 629,382   | (466,025 to 776,903)     | 329.6                                | (244.7 to 405.6)                      |
| Counts, All Ages |         |                    |        |      |           |                          |                                      |                                       |
| Country          | measure | Stroke Type        | sex    | year | Mean      | 95% UI                   | Rate<br>Age-<br>standardized<br>Mean | Per 100,000<br>standardized<br>95% UI |
|                  |         |                    | Female | 1990 | 614,995   | (523,943 to 808,836)     | 399                                  | (337.7 to 525.1)                      |
|                  |         |                    |        | 2013 | 666,125   | (512,565 to 807,151)     | 295.5                                | (227.7 to 350.3)                      |
|                  |         |                    | Both   | 1990 | 1,199,791 | (1,074,283 to 1,439,026) | 435.6                                | (390.3 to 521.8)                      |
|                  |         |                    |        | 2013 | 1,295,507 | (1,036,041 to 1,481,442) | 311.2                                | (249.6 to 355.2)                      |
|                  | YLDs    | Ischemic Stroke    | Male   | 1990 | 154,842   | (101,969 to 215,960)     | 129.9                                | (86.1 to 181.1)                       |
|                  |         |                    |        | 2013 | 341,067   | (239,197 to 449,654)     | 175.8                                | (123.1 to 231.8)                      |
|                  |         |                    | Female | 1990 | 175,958   | (113,293 to 249,169)     | 103.2                                | (65.9 to 146.9)                       |
|                  |         |                    |        | 2013 | 378,932   | (264,899 to 509,498)     | 163.8                                | (115.0 to 220.8)                      |
|                  |         |                    | Both   | 1990 | 330,801   | (222,886 to 453,557)     | 114.4                                | (76.8 to 156.7)                       |
|                  |         |                    |        | 2013 | 719,999   | (511,420 to 965,127)     | 169                                  | (119.8 to 226.9)                      |
|                  |         | Hemorrhagic Stroke | Male   | 1990 | 23,632    | (15,006 to 34,670)       | 19.5                                 | (12.4 to 28.6)                        |
|                  |         |                    |        | 2013 | 53,721    | (35,922 to 74,177)       | 29                                   | (19.4 to 39.8)                        |
|                  |         |                    | Female | 1990 | 31,655    | (20,075 to 46,696)       | 19.8                                 | (12.5 to 29.3)                        |
|                  |         |                    |        | 2013 | 83,275    | (57,455 to 113,967)      | 39.2                                 | (27.0 to 53.8)                        |

|         |         |                    |        |      |             |                     |        |                    |
|---------|---------|--------------------|--------|------|-------------|---------------------|--------|--------------------|
|         |         |                    | Both   | 1990 | 55,288      | (37,616 to 78,894)  | 19.6   | (13.3 to 27.9)     |
|         |         |                    | Both   | 2013 | 136,997     | (96,067 to 184,826) | 34.2   | (23.9 to 46.2)     |
| Uruguay | Deaths  | Ischemic Stroke    | Male   | 1990 | 1,209       | (976 to 1,426)      | 89.5   | (72.5 to 105.8)    |
|         |         |                    |        | 2013 | 1,085       | (861 to 1,383)      | 57.3   | (45.5 to 73.2)     |
|         |         |                    | Female | 1990 | 1,601       | (1,325 to 1,925)    | 76.3   | (62.9 to 91.5)     |
|         |         |                    |        | 2013 | 1,545       | (1,181 to 2,261)    | 42.5   | (33.0 to 62.1)     |
|         |         |                    | Both   | 1990 | 2,810       | (2,457 to 3,145)    | 82.3   | (71.8 to 92.5)     |
|         |         |                    |        | 2013 | 2,631       | (2,197 to 3,494)    | 48.6   | (40.5 to 64.2)     |
|         | Deaths  | Hemorrhagic Stroke | Male   | 1990 | 501         | (402 to 683)        | 35.2   | (28.1 to 48.4)     |
|         |         |                    |        | 2013 | 641         | (400 to 834)        | 34.5   | (21.5 to 44.8)     |
|         |         |                    | Female | 1990 | 607         | (510 to 885)        | 30.6   | (25.9 to 44.3)     |
|         |         |                    |        | 2013 | 840         | (524 to 1,090)      | 26.9   | (17.2 to 34.3)     |
|         |         |                    | Both   | 1990 | 1,108       | (947 to 1,472)      | 32.7   | (27.9 to 43.3)     |
|         |         |                    |        | 2013 | 1,481       | (1,033 to 1,781)    | 30.2   | (21.3 to 36.2)     |
|         | DALYs   | Ischemic Stroke    | Male   | 1990 | 19,196      | (15,525 to 22,700)  | 1318.6 | (1068.8 to 1556.9) |
|         |         |                    |        | 2013 | 14,572      | (11,603 to 18,834)  | 783.4  | (621.8 to 1013.5)  |
|         |         |                    | Female | 1990 | 19,097      | (15,752 to 22,553)  | 942.2  | (771.0 to 1109.9)  |
|         |         |                    |        |      | Counts, All | Ages                | Rate   | Per 100,000        |
|         |         |                    |        |      |             |                     | Age-   | standardized       |
| Country | measure | Stroke Type        | sex    | year | Mean        | 95% UI              | Mean   | 95% UI             |
|         |         |                    |        | 2013 | 14,143      | (11,147 to 20,539)  | 457.6  | (358.1 to 673.5)   |
|         |         |                    | Both   | 1990 | 38,293      | (33,479 to 42,723)  | 1108.8 | (970.6 to 1236.1)  |
|         |         |                    |        | 2013 | 28,715      | (24,086 to 37,392)  | 594.9  | (496.7 to 775.8)   |
|         |         | Hemorrhagic Stroke | Male   | 1990 | 10,894      | (8,885 to 14,255)   | 727.8  | (595.3 to 957.8)   |
|         |         |                    |        | 2013 | 11,786      | (7,869 to 15,278)   | 650.1  | (435.7 to 842.8)   |
|         |         |                    | Female | 1990 | 11,014      | (9,621 to 15,555)   | 602.6  | (529.0 to 842.1)   |

|            |        |                    |        |      |        |                    |       |                  |
|------------|--------|--------------------|--------|------|--------|--------------------|-------|------------------|
|            |        |                    |        | 2013 | 11,272 | (7,402 to 13,967)  | 458.2 | (308.1 to 563.7) |
|            |        |                    | Both   | 1990 | 21,908 | (18,989 to 28,082) | 658.5 | (572.6 to 842.7) |
|            |        |                    |        | 2013 | 23,058 | (16,826 to 27,560) | 542.7 | (397.3 to 651.1) |
|            | YLDs   | Ischemic Stroke    | Male   | 1990 | 512    | (335 to 717)       | 33.8  | (22.5 to 47.6)   |
|            |        |                    |        | 2013 | 561    | (366 to 808)       | 30.8  | (20.1 to 44.2)   |
|            |        |                    | Female | 1990 | 380    | (250 to 534)       | 19.7  | (13.2 to 27.6)   |
|            |        |                    |        | 2013 | 450    | (288 to 622)       | 18.4  | (12.0 to 25.5)   |
|            |        |                    | Both   | 1990 | 892    | (603 to 1,218)     | 25.9  | (17.5 to 35.4)   |
|            |        |                    |        | 2013 | 1,011  | (688 to 1,361)     | 23.7  | (16.1 to 32.0)   |
|            |        | Hemorrhagic Stroke | Male   | 1990 | 167    | (104 to 239)       | 11.1  | (7.0 to 15.9)    |
|            |        |                    |        | 2013 | 220    | (141 to 315)       | 12.3  | (7.9 to 17.5)    |
|            |        |                    | Female | 1990 | 105    | (66 to 156)        | 5.7   | (3.6 to 8.5)     |
|            |        |                    |        | 2013 | 137    | (87 to 196)        | 6.1   | (4.0 to 8.7)     |
|            |        |                    | Both   | 1990 | 272    | (177 to 377)       | 8.1   | (5.3 to 11.2)    |
|            |        |                    | Both   | 2013 | 357    | (239 to 491)       | 8.8   | (6.0 to 12.1)    |
| Uzbekistan | Deaths | Ischemic Stroke    | Male   | 1990 | 3,910  | (3,107 to 4,783)   | 113.5 | (90.5 to 139.1)  |
|            |        |                    |        | 2013 | 7,420  | (5,603 to 9,574)   | 123.5 | (95.1 to 156.3)  |
|            |        |                    | Female | 1990 | 5,051  | (4,301 to 6,130)   | 92.2  | (78.4 to 111.4)  |
|            |        |                    |        | 2013 | 7,549  | (5,543 to 9,554)   | 93.7  | (68.7 to 118.8)  |
|            |        |                    | Both   | 1990 | 8,961  | (7,856 to 10,457)  | 100.9 | (88.3 to 117.6)  |
|            |        |                    |        | 2013 | 14,970 | (12,470 to 17,906) | 107.4 | (89.3 to 126.8)  |
|            | Deaths | Hemorrhagic Stroke | Male   | 1990 | 2,944  | (2,268 to 3,729)   | 75.7  | (57.5 to 96.6)   |
|            |        |                    |        | 2013 | 5,466  | (3,912 to 7,391)   | 80.2  | (58.1 to 106.8)  |
|            |        |                    | Female | 1990 | 3,680  | (2,946 to 4,676)   | 64.7  | (51.5 to 82.5)   |
|            |        |                    |        | 2013 | 5,236  | (3,656 to 7,254)   | 61.2  | (42.8 to 83.1)   |
|            |        |                    | Both   | 1990 | 6,625  | (5,606 to 7,973)   | 69.1  | (58.3 to 84.1)   |
|            |        |                    |        | 2013 | 10,703 | (8,705 to 13,448)  | 69.9  | (56.4 to 88.2)   |

|         |         |                    |        |      |                  |                      |              |                        |
|---------|---------|--------------------|--------|------|------------------|----------------------|--------------|------------------------|
|         | DALYs   | Ischemic Stroke    | Male   | 1990 | 73,913           | (58,709 to 91,686)   | 1839         | (1465.9 to 2264.4)     |
|         |         |                    |        | 2013 | 144,434          | (104,963 to 193,337) | 1979         | (1471.8 to 2578.4)     |
|         |         |                    | Female | 1990 | 73,219           | (61,008 to 89,756)   | 1293.8       | (1082.7 to 1586.0)     |
|         |         |                    |        | 2013 | 106,255          | (78,687 to 140,602)  | 1239.1       | (915.2 to 1609.4)      |
|         |         |                    |        |      | Counts, All Ages |                      | Rate         | Per 100,000            |
| Country | measure | Stroke Type        | sex    | year | Mean             | 95% UI               | Age-<br>Mean | standardized<br>95% UI |
|         |         |                    | Both   | 1990 | 147,133          | (126,398 to 173,453) | 1524.9       | (1319.6 to 1787.9)     |
|         |         |                    |        | 2013 | 250,690          | (204,664 to 308,290) | 1580.5       | (1297.2 to 1916.4)     |
|         |         | Hemorrhagic Stroke | Male   | 1990 | 70,205           | (55,703 to 87,549)   | 1517         | (1189.3 to 1915.5)     |
|         |         |                    |        | 2013 | 134,038          | (94,005 to 186,930)  | 1585.3       | (1133.0 to 2159.0)     |
|         |         |                    | Female | 1990 | 75,122           | (60,074 to 90,600)   | 1255.8       | (1003.1 to 1519.1)     |
|         |         |                    |        | 2013 | 104,916          | (74,504 to 149,646)  | 1095.3       | (781.0 to 1520.8)      |
|         |         |                    | Both   | 1990 | 145,327          | (124,012 to 170,168) | 1365.9       | (1162.6 to 1603.6)     |
|         |         |                    |        | 2013 | 238,955          | (190,173 to 304,975) | 1323         | (1059.2 to 1679.1)     |
|         | YLDs    | Ischemic Stroke    | Male   | 1990 | 406              | (258 to 591)         | 8.8          | (5.6 to 12.8)          |
|         |         |                    |        | 2013 | 752              | (476 to 1,074)       | 8.9          | (5.7 to 12.7)          |
|         |         |                    | Female | 1990 | 478              | (301 to 678)         | 8            | (5.1 to 11.5)          |
|         |         |                    |        | 2013 | 754              | (475 to 1,135)       | 7.7          | (4.9 to 11.5)          |
|         |         |                    | Both   | 1990 | 884              | (579 to 1,237)       | 8.4          | (5.5 to 11.7)          |
|         |         |                    |        | 2013 | 1,506            | (1,007 to 2,155)     | 8.3          | (5.6 to 11.8)          |



|         |         |                    |        |      |                  |                |        |                   |
|---------|---------|--------------------|--------|------|------------------|----------------|--------|-------------------|
|         |         | Hemorrhagic Stroke | Male   | 1990 | 442              | (276 to 642)   | 8      | (5.1 to 11.6)     |
|         |         |                    |        | 2013 | 782              | (498 to 1,112) | 7.8    | (5.0 to 11.2)     |
|         |         |                    | Female | 1990 | 298              | (188 to 436)   | 4.6    | (2.8 to 6.8)      |
|         |         |                    |        | 2013 | 498              | (313 to 738)   | 4.6    | (2.8 to 6.9)      |
|         |         |                    | Both   | 1990 | 741              | (481 to 1,036) | 6.1    | (4.0 to 8.6)      |
|         |         |                    | Both   | 2013 | 1,281            | (845 to 1,805) | 6.1    | (4.1 to 8.7)      |
| Vanuatu | Deaths  | Ischemic Stroke    | Male   | 1990 | 24               | (12 to 35)     | 81.9   | (41.6 to 118.4)   |
|         |         |                    |        | 2013 | 39               | (22 to 56)     | 81.5   | (48.4 to 112.8)   |
|         |         |                    | Female | 1990 | 11               | (7 to 18)      | 51.1   | (31.8 to 79.3)    |
|         |         |                    |        | 2013 | 29               | (14 to 48)     | 61.8   | (33.7 to 98.3)    |
|         |         |                    | Both   | 1990 | 36               | (21 to 52)     | 68.3   | (42.6 to 96.1)    |
|         |         |                    |        | 2013 | 68               | (39 to 100)    | 71.6   | (43.5 to 102.4)   |
|         | Deaths  | Hemorrhagic Stroke | Male   | 1990 | 42               | (26 to 61)     | 123.4  | (78.7 to 176.7)   |
|         |         |                    |        | 2013 | 78               | (49 to 117)    | 128.4  | (82.3 to 185.4)   |
|         |         |                    | Female | 1990 | 21               | (13 to 33)     | 80.5   | (50.8 to 125.8)   |
|         |         |                    |        | 2013 | 54               | (31 to 85)     | 96.8   | (58.0 to 148.2)   |
|         |         |                    | Both   | 1990 | 63               | (41 to 90)     | 103.9  | (69.5 to 145.2)   |
|         |         |                    |        | 2013 | 133              | (85 to 197)    | 112.6  | (74.7 to 158.4)   |
|         | DALYs   | Ischemic Stroke    | Male   | 1990 | 487              | (237 to 784)   | 1426.1 | (715.1 to 2204.5) |
|         |         |                    |        | 2013 | 836              | (445 to 1,288) | 1353.1 | (767.3 to 1965.3) |
|         |         |                    | Female | 1990 | 236              | (131 to 377)   | 849.6  | (498.0 to 1330.1) |
|         |         |                    |        |      | Counts, All Ages |                | Rate   | Per 100,000       |
|         |         |                    |        |      |                  |                | Age-   | standardized      |
| Country | measure | Stroke Type        | sex    | year | Mean             | 95% UI         | Mean   | 95% UI            |
|         |         |                    |        | 2013 | 585              | (261 to 997)   | 967    | (479.7 to 1584.3) |
|         |         |                    | Both   | 1990 | 723              | (403 to 1,113) | 1167.1 | (686.1 to 1733.6) |
|         |         |                    |        | 2013 | 1,421            | (758 to 2,186) | 1159.8 | (662.4 to 1693.7) |

|           |        |                    |        |      |       |                  |        |                    |
|-----------|--------|--------------------|--------|------|-------|------------------|--------|--------------------|
|           |        | Hemorrhagic Stroke | Male   | 1990 | 1,184 | (728 to 1,764)   | 2885.7 | (1792.4 to 4286.1) |
|           |        |                    |        | 2013 | 2,322 | (1,429 to 3,637) | 2946.2 | (1837.7 to 4465.9) |
|           |        |                    | Female | 1990 | 558   | (334 to 911)     | 1682.9 | (1034.5 to 2678.3) |
|           |        |                    |        | 2013 | 1,425 | (804 to 2,338)   | 1956.8 | (1135.9 to 3096.1) |
|           |        |                    | Both   | 1990 | 1,742 | (1,108 to 2,588) | 2325.8 | (1506.0 to 3400.9) |
|           |        |                    |        | 2013 | 3,748 | (2,348 to 5,730) | 2451.1 | (1553.2 to 3677.7) |
|           | YLDs   | Ischemic Stroke    | Male   | 1990 | 8     | (5 to 12)        | 27     | (17.8 to 38.2)     |
|           |        |                    |        | 2013 | 15    | (10 to 21)       | 26.7   | (17.5 to 37.9)     |
|           |        |                    | Female | 1990 | 5     | (3 to 7)         | 19.5   | (12.8 to 27.7)     |
|           |        |                    |        | 2013 | 12    | (7 to 17)        | 20.6   | (13.2 to 30.0)     |
|           |        |                    | Both   | 1990 | 13    | (9 to 19)        | 23.7   | (16.0 to 32.6)     |
|           |        |                    |        | 2013 | 27    | (18 to 37)       | 23.7   | (16.1 to 32.5)     |
|           |        | Hemorrhagic Stroke | Male   | 1990 | 11    | (7 to 15)        | 31.3   | (20.3 to 43.7)     |
|           |        |                    |        | 2013 | 20    | (13 to 29)       | 31.8   | (20.5 to 45.7)     |
|           |        |                    | Female | 1990 | 6     | (4 to 8)         | 21.1   | (14.0 to 29.1)     |
|           |        |                    |        | 2013 | 14    | (9 to 20)        | 22.1   | (14.0 to 31.1)     |
|           |        |                    | Both   | 1990 | 17    | (11 to 23)       | 26.7   | (17.7 to 36.5)     |
|           |        |                    | Both   | 2013 | 34    | (22 to 48)       | 26.9   | (17.6 to 37.0)     |
| Venezuela | Deaths | Ischemic Stroke    | Male   | 1990 | 1,843 | (1,124 to 2,390) | 58.7   | (35.8 to 76.5)     |
|           |        |                    |        | 2013 | 1,903 | (1,246 to 3,221) | 23.4   | (15.0 to 39.5)     |
|           |        |                    | Female | 1990 | 1,999 | (1,192 to 2,323) | 53.6   | (32.3 to 62.4)     |
|           |        |                    |        | 2013 | 1,970 | (1,371 to 3,329) | 20.5   | (14.2 to 35.0)     |
|           |        |                    | Both   | 1990 | 3,843 | (2,515 to 4,629) | 56.1   | (37.0 to 67.5)     |
|           |        |                    |        | 2013 | 3,874 | (2,776 to 6,195) | 22     | (15.6 to 35.1)     |
|           | Deaths | Hemorrhagic Stroke | Male   | 1990 | 1,385 | (984 to 2,174)   | 36.7   | (24.7 to 59.8)     |
|           |        |                    |        | 2013 | 4,554 | (3,034 to 5,822) | 50.5   | (32.9 to 65.2)     |

|         |         |                    |        |      |             |                      |       |                   |
|---------|---------|--------------------|--------|------|-------------|----------------------|-------|-------------------|
|         |         |                    | Female | 1990 | 1,533       | (1,220 to 2,521)     | 35.1  | (26.7 to 61.0)    |
|         |         |                    |        | 2013 | 4,562       | (2,885 to 5,563)     | 44.6  | (27.4 to 55.0)    |
|         |         |                    | Both   | 1990 | 2,919       | (2,250 to 4,450)     | 35.8  | (26.5 to 57.8)    |
|         |         |                    |        | 2013 | 9,117       | (6,366 to 10,924)    | 47.6  | (32.1 to 57.6)    |
|         | DALYs   | Ischemic Stroke    | Male   | 1990 | 35,516      | (21,096 to 46,077)   | 867.7 | (526.2 to 1126.5) |
|         |         |                    |        | 2013 | 31,490      | (21,551 to 52,164)   | 323.5 | (216.2 to 539.2)  |
|         |         |                    | Female | 1990 | 32,819      | (18,630 to 38,269)   | 717.6 | (421.2 to 833.7)  |
|         |         |                    |        | 2013 | 25,031      | (17,998 to 43,950)   | 235.8 | (169.2 to 407.6)  |
|         |         |                    | Both   | 1990 | 68,335      | (43,032 to 83,174)   | 788.7 | (508.3 to 953.6)  |
|         |         |                    |        | 2013 | 56,522      | (41,900 to 91,203)   | 277.8 | (204.1 to 443.7)  |
|         |         |                    |        |      | Counts, All | Ages                 | Rate  | Per 100,000       |
|         |         |                    |        |      |             |                      | Age-  | standardized      |
| Country | measure | Stroke Type        | sex    | year | Mean        | 95% UI               | Mean  | 95% UI            |
|         |         | Hemorrhagic Stroke | Male   | 1990 | 36,171      | (27,233 to 53,559)   | 714.4 | (518.6 to 1097.4) |
|         |         |                    |        | 2013 | 97,820      | (69,042 to 124,233)  | 886.7 | (617.5 to 1123.3) |
|         |         |                    | Female | 1990 | 37,585      | (32,146 to 56,397)   | 672.5 | (556.4 to 1052.6) |
|         |         |                    |        | 2013 | 79,826      | (56,359 to 95,528)   | 678.3 | (468.7 to 817.0)  |
|         |         |                    | Both   | 1990 | 73,757      | (60,454 to 105,427)  | 691.3 | (546.8 to 1019.7) |
|         |         |                    |        | 2013 | 177,647     | (133,781 to 209,597) | 779.2 | (574.5 to 923.9)  |
|         | YLDs    | Ischemic Stroke    | Male   | 1990 | 326         | (198 to 487)         | 7.7   | (4.8 to 11.5)     |
|         |         |                    |        | 2013 | 773         | (476 to 1,146)       | 7.5   | (4.6 to 11.2)     |
|         |         |                    | Female | 1990 | 277         | (171 to 413)         | 5.9   | (3.6 to 8.8)      |
|         |         |                    |        | 2013 | 677         | (425 to 1,005)       | 6     | (3.7 to 8.9)      |
|         |         |                    | Both   | 1990 | 603         | (395 to 830)         | 6.8   | (4.4 to 9.2)      |
|         |         |                    |        | 2013 | 1,451       | (945 to 2,078)       | 6.7   | (4.3 to 9.6)      |
|         |         | Hemorrhagic        | Male   | 1990 | 992         | (649 to 1,426)       | 19.9  | (13.1 to 28.5)    |



|  |      |                    |        |      |           |                        |        |                    |
|--|------|--------------------|--------|------|-----------|------------------------|--------|--------------------|
|  |      |                    |        | 2013 | 514,796   | (340,216 to 657,908)   | 1156.5 | (763.2 to 1517.9)  |
|  |      |                    | Both   | 1990 | 752,121   | (540,071 to 929,524)   | 1914.3 | (1380.3 to 2355.7) |
|  |      |                    |        | 2013 | 1,022,625 | (722,434 to 1,293,542) | 1454.4 | (1021.7 to 1844.4) |
|  |      | Hemorrhagic Stroke | Male   | 1990 | 689,528   | (522,123 to 883,739)   | 3657.2 | (2738.3 to 4728.7) |
|  |      |                    |        | 2013 | 650,507   | (457,313 to 908,347)   | 1917.4 | (1361.5 to 2710.9) |
|  |      |                    | Female | 1990 | 507,657   | (358,655 to 675,885)   | 2178.4 | (1539.7 to 2894.5) |
|  |      |                    |        | 2013 | 435,037   | (310,971 to 644,826)   | 998.5  | (706.3 to 1499.5)  |
|  |      |                    | Both   | 1990 | 1,197,186 | (976,733 to 1,433,140) | 2857.1 | (2317.3 to 3437.8) |
|  |      |                    |        | 2013 | 1,085,545 | (832,966 to 1,398,783) | 1408.6 | (1081.2 to 1850.6) |
|  | YLDs | Ischemic Stroke    | Male   | 1990 | 4,978     | (3,341 to 6,952)       | 30.1   | (20.2 to 42.0)     |
|  |      |                    |        | 2013 | 7,949     | (5,294 to 11,628)      | 27.8   | (18.2 to 40.6)     |
|  |      |                    | Female | 1990 | 5,458     | (3,712 to 7,535)       | 23.1   | (15.7 to 32.0)     |
|  |      |                    |        | 2013 | 9,513     | (6,286 to 13,747)      | 22.3   | (14.8 to 31.9)     |
|  |      |                    | Both   | 1990 | 10,436    | (7,147 to 14,243)      | 26     | (17.8 to 35.4)     |
|  |      |                    |        | 2013 | 17,462    | (12,040 to 24,329)     | 24.6   | (16.9 to 34.3)     |
|  |      | Hemorrhagic Stroke | Male   | 1990 | 5,881     | (3,975 to 8,213)       | 33.3   | (22.3 to 46.4)     |
|  |      |                    |        | 2013 | 9,429     | (6,238 to 13,236)      | 29.8   | (19.4 to 41.8)     |
|  |      |                    | Female | 1990 | 5,444     | (3,630 to 7,299)       | 22.8   | (15.1 to 30.5)     |
|  |      |                    |        | 2013 | 9,118     | (5,983 to 12,927)      | 21     | (13.8 to 29.8)     |
|  |      |                    | Both   | 1990 | 11,325    | (7,794 to 15,095)      | 27.1   | (18.8 to 36.1)     |
|  |      |                    | Both   | 2013 | 18,547    | (12,690 to 25,319)     | 24.7   | (17.0 to 34.0)     |

| Yemen   | Deaths  | Ischemic Stroke    | Male   | 1990 | 1,288            | (681 to 2,080)      | 104              | (55.2 to 161.5)    |
|---------|---------|--------------------|--------|------|------------------|---------------------|------------------|--------------------|
|         |         |                    |        | 2013 | 2,988            | (1,579 to 4,553)    | 100.2            | (54.6 to 146.5)    |
|         |         |                    | Female | 1990 | 1,702            | (894 to 2,736)      | 99.8             | (56.4 to 153.4)    |
|         |         |                    |        | 2013 | 3,600            | (1,811 to 5,571)    | 108.6            | (59.6 to 159.6)    |
|         |         |                    | Both   | 1990 | 2,990            | (1,812 to 4,470)    | 101.5            | (64.8 to 146.8)    |
|         |         |                    |        | 2013 | 6,589            | (3,909 to 9,750)    | 104.6            | (65.8 to 143.8)    |
|         | Deaths  | Hemorrhagic Stroke | Male   | 1990 | 1,984            | (1,264 to 3,050)    | 102.3            | (59.3 to 167.0)    |
|         |         |                    |        | 2013 | 3,807            | (2,256 to 6,297)    | 92.7             | (55.2 to 148.0)    |
|         |         |                    | Female | 1990 | 2,771            | (1,675 to 4,462)    | 117.3            | (74.1 to 195.4)    |
|         |         |                    |        | 2013 | 4,910            | (2,780 to 8,281)    | 111.5            | (67.1 to 182.4)    |
|         |         |                    | Both   | 1990 | 4,755            | (3,041 to 7,162)    | 111              | (71.9 to 172.8)    |
|         |         |                    |        | 2013 | 8,718            | (5,325 to 13,697)   | 102.6            | (65.1 to 157.4)    |
|         |         |                    |        |      | Counts, All Ages |                     | Rate Per 100,000 |                    |
|         |         |                    |        |      |                  |                     | Age-standardized |                    |
| Country | measure | Stroke Type        | sex    | year | Mean             | 95% UI              | Mean             | 95% UI             |
|         | DALYs   | Ischemic Stroke    | Male   | 1990 | 30,827           | (16,482 to 52,929)  | 1632.7           | (849.2 to 2667.7)  |
|         |         |                    |        | 2013 | 59,530           | (30,172 to 98,287)  | 1466.6           | (778.7 to 2261.7)  |
|         |         |                    | Female | 1990 | 37,258           | (16,991 to 67,733)  | 1561.9           | (820.0 to 2528.0)  |
|         |         |                    |        | 2013 | 70,837           | (33,809 to 118,302) | 1621.7           | (809.5 to 2534.5)  |
|         |         |                    | Both   | 1990 | 68,085           | (38,085 to 111,719) | 1592.3           | (956.3 to 2418.0)  |
|         |         |                    |        | 2013 | 130,367          | (69,703 to 209,027) | 1548.4           | (897.5 to 2336.2)  |
|         |         | Hemorrhagic Stroke | Male   | 1990 | 82,402           | (51,213 to 125,671) | 2308.8           | (1389.9 to 3651.4) |
|         |         |                    |        | 2013 | 120,801          | (72,023 to 199,249) | 1911.9           | (1122.5 to 3227.3) |
|         |         |                    | Female | 1990 | 100,687          | (53,262 to          | 2629.6           | (1541.6 to 4320.2) |

|        |        |                    |        |      |         |                      |        |                    |
|--------|--------|--------------------|--------|------|---------|----------------------|--------|--------------------|
|        |        |                    |        |      |         | 157,811)             |        |                    |
|        |        |                    |        | 2013 | 145,951 | (82,020 to 247,841)  | 2328.5 | (1318.0 to 3932.0) |
|        |        |                    | Both   | 1990 | 183,090 | (115,049 to 265,819) | 2490.4 | (1534.3 to 3907.0) |
|        |        |                    |        | 2013 | 266,753 | (163,187 to 425,141) | 2130.5 | (1283.9 to 3407.2) |
|        | YLDs   | Ischemic Stroke    | Male   | 1990 | 199     | (132 to 280)         | 10     | (6.7 to 14.2)      |
|        |        |                    |        | 2013 | 501     | (318 to 706)         | 9.6    | (6.0 to 13.5)      |
|        |        |                    | Female | 1990 | 179     | (114 to 257)         | 7.3    | (4.6 to 10.5)      |
|        |        |                    |        | 2013 | 408     | (260 to 582)         | 7.4    | (4.8 to 10.5)      |
|        |        |                    | Both   | 1990 | 379     | (251 to 526)         | 8.5    | (5.7 to 11.8)      |
|        |        |                    |        | 2013 | 909     | (612 to 1,246)       | 8.4    | (5.7 to 11.6)      |
|        |        | Hemorrhagic Stroke | Male   | 1990 | 31      | (18 to 47)           | 1.3    | (0.8 to 1.9)       |
|        |        |                    |        | 2013 | 77      | (43 to 123)          | 1.3    | (0.7 to 2.0)       |
|        |        |                    | Female | 1990 | 37      | (21 to 59)           | 1.3    | (0.8 to 2.2)       |
|        |        |                    |        | 2013 | 79      | (44 to 128)          | 1.2    | (0.7 to 2.1)       |
|        |        |                    | Both   | 1990 | 68      | (43 to 100)          | 1.3    | (0.8 to 1.9)       |
|        |        |                    | Both   | 2013 | 156     | (98 to 232)          | 1.3    | (0.8 to 1.9)       |
| Zambia | Deaths | Ischemic Stroke    | Male   | 1990 | 214     | (102 to 321)         | 27.4   | (11.2 to 43.4)     |
|        |        |                    |        | 2013 | 1,026   | (584 to 1,471)       | 67.6   | (38.2 to 96.1)     |
|        |        |                    | Female | 1990 | 930     | (601 to 1,212)       | 93     | (60.1 to 123.8)    |
|        |        |                    |        | 2013 | 2,183   | (1,329 to 2,894)     | 119.7  | (73.6 to 157.8)    |
|        |        |                    | Both   | 1990 | 1,144   | (780 to 1,512)       | 64.3   | (43.0 to 86.4)     |
|        |        |                    |        | 2013 | 3,210   | (2,182 to 3,972)     | 97     | (64.9 to 121.6)    |
|        | Deaths | Hemorrhagic Stroke | Male   | 1990 | 316     | (207 to 425)         | 26.1   | (12.6 to 40.8)     |
|        |        |                    |        | 2013 | 1,189   | (812 to 1,645)       | 62.8   | (39.6 to 91.5)     |
|        |        |                    | Female | 1990 | 1,069   | (779 to 1,417)       | 85.1   | (59.4 to 117.0)    |

| Country | measure | Stroke Type        | sex    | year | Counts, All Ages |                     | Rate Per 100,000 Age-standardized |                    |
|---------|---------|--------------------|--------|------|------------------|---------------------|-----------------------------------|--------------------|
|         |         |                    |        |      | Mean             | 95% UI              | Mean                              | 95% UI             |
|         |         |                    |        | 2013 | 2,347            | (1,754 to 3,318)    | 110.9                             | (81.3 to 159.5)    |
|         |         |                    | Both   | 1990 | 1,386            | (1,049 to 1,741)    | 58.8                              | (41.1 to 77.2)     |
|         |         |                    |        | 2013 | 3,536            | (2,816 to 4,668)    | 89.3                              | (68.3 to 120.5)    |
|         | DALYs   | Ischemic Stroke    | Male   | 1990 | 4,316            | (2,473 to 5,861)    | 338.9                             | (172.1 to 500.3)   |
|         |         |                    |        | 2013 | 17,762           | (10,338 to 25,224)  | 944.2                             | (538.4 to 1346.5)  |
|         |         |                    | Female | 1990 | 15,209           | (9,633 to 19,840)   | 1225.9                            | (788.0 to 1591.2)  |
|         |         |                    |        | 2013 | 33,378           | (19,722 to 44,404)  | 1602.4                            | (968.4 to 2118.9)  |
|         |         |                    | Both   | 1990 | 19,526           | (13,341 to 24,677)  | 830.8                             | (566.2 to 1090.3)  |
|         |         |                    |        | 2013 | 51,140           | (33,402 to 63,378)  | 1309.3                            | (871.1 to 1613.8)  |
|         |         | Hemorrhagic Stroke | Male   | 1990 | 10,446           | (7,725 to 13,846)   | 528.6                             | (356.7 to 712.0)   |
|         |         |                    |        | 2013 | 29,310           | (20,922 to 39,872)  | 1156.4                            | (785.5 to 1604.5)  |
|         |         |                    | Female | 1990 | 25,199           | (19,080 to 33,393)  | 1529                              | (1123.5 to 2029.5) |
|         |         |                    |        | 2013 | 50,653           | (37,555 to 70,907)  | 1970.5                            | (1470.0 to 2760.7) |
|         |         |                    | Both   | 1990 | 35,646           | (28,451 to 44,102)  | 1073.4                            | (820.6 to 1351.0)  |
|         |         |                    |        | 2013 | 79,964           | (64,668 to 103,723) | 1593.1                            | (1274.3 to 2117.1) |
|         | YLDs    | Ischemic Stroke    | Male   | 1990 | 160              | (97 to 236)         | 9.9                               | (5.9 to 14.9)      |
|         |         |                    |        | 2013 | 285              | (186 to 431)        | 9.9                               | (6.4 to 15.0)      |
|         |         |                    | Female | 1990 | 128              | (82 to 190)         | 7.3                               | (4.6 to 10.7)      |
|         |         |                    |        | 2013 | 216              | (134 to 331)        | 7.1                               | (4.3 to 11.2)      |
|         |         |                    | Both   | 1990 | 289              | (188 to 412)        | 8.5                               | (5.6 to 12.3)      |
|         |         |                    |        | 2013 | 502              | (330 to 709)        | 8.4                               | (5.6 to 11.9)      |
|         |         | Hemorrhagic Stroke | Male   | 1990 | 62               | (39 to 95)          | 3.1                               | (2.0 to 4.8)       |
|         |         |                    |        | 2013 | 108              | (68 to 166)         | 2.9                               | (1.8 to 4.3)       |



|          |         |                    |        |      |                  |                    |        |                   |
|----------|---------|--------------------|--------|------|------------------|--------------------|--------|-------------------|
|          |         |                    | Female | 1990 | 37               | (23 to 56)         | 1.8    | (1.1 to 2.7)      |
|          |         |                    |        | 2013 | 62               | (36 to 97)         | 1.6    | (1.0 to 2.6)      |
|          |         |                    | Both   | 1990 | 100              | (66 to 145)        | 2.4    | (1.6 to 3.6)      |
|          |         |                    | Both   | 2013 | 171              | (112 to 246)       | 2.3    | (1.5 to 3.2)      |
| Zimbabwe | Deaths  | Ischemic Stroke    | Male   | 1990 | 568              | (437 to 768)       | 43     | (33.1 to 59.2)    |
|          |         |                    |        | 2013 | 1,231            | (790 to 1,713)     | 53.7   | (34.2 to 74.8)    |
|          |         |                    | Female | 1990 | 1,213            | (936 to 1,476)     | 81.6   | (63.3 to 99.8)    |
|          |         |                    |        | 2013 | 2,126            | (1,384 to 3,217)   | 72.3   | (47.6 to 108.5)   |
|          |         |                    | Both   | 1990 | 1,782            | (1,501 to 2,145)   | 64.4   | (54.4 to 77.8)    |
|          |         |                    |        | 2013 | 3,357            | (2,444 to 4,475)   | 64.7   | (47.2 to 85.7)    |
|          | Deaths  | Hemorrhagic Stroke | Male   | 1990 | 653              | (513 to 887)       | 35.9   | (27.6 to 50.2)    |
|          |         |                    |        | 2013 | 1,505            | (919 to 2,069)     | 48.6   | (27.7 to 67.9)    |
|          |         |                    | Female | 1990 | 1,187            | (924 to 1,432)     | 62.4   | (47.5 to 74.2)    |
|          |         |                    |        | 2013 | 2,153            | (1,467 to 3,139)   | 56.2   | (37.2 to 87.0)    |
|          |         |                    | Both   | 1990 | 1,840            | (1,574 to 2,186)   | 50.2   | (41.9 to 59.3)    |
|          |         |                    |        |      | Counts, All Ages |                    | Rate   | Per 100,000       |
|          |         |                    |        |      |                  |                    | Age-   | standardized      |
| Country  | measure | Stroke Type        | sex    | year | Mean             | 95% UI             | Mean   | 95% UI            |
|          |         |                    |        | 2013 | 3,658            | (2,588 to 4,731)   | 53     | (37.7 to 70.7)    |
|          | DALYs   | Ischemic Stroke    | Male   | 1990 | 11,169           | (8,683 to 15,185)  | 658.9  | (510.8 to 893.3)  |
|          |         |                    |        | 2013 | 22,406           | (14,542 to 31,355) | 822.6  | (526.3 to 1141.3) |
|          |         |                    | Female | 1990 | 20,091           | (14,962 to 24,937) | 1133.4 | (864.4 to 1386.4) |
|          |         |                    |        | 2013 | 31,298           | (19,731 to 49,730) | 951    | (609.8 to 1468.5) |
|          |         |                    | Both   | 1990 | 31,260           | (25,987 to 37,757) | 918    | (769.7 to 1097.1) |
|          |         |                    |        | 2013 | 53,704           | (39,268 to 72,628) | 899.8  | (651.7 to 1210.0) |
|          |         | Hemorrhagic Stroke | Male   | 1990 | 20,897           | (16,287 to 28,296) | 805.1  | (626.9 to 1092.7) |
|          |         |                    |        | 2013 | 52,446           | (34,197 to 71,022) | 1154.6 | (717.0 to 1599.2) |

|  |      |                    |        |      |         |                     |        |                    |
|--|------|--------------------|--------|------|---------|---------------------|--------|--------------------|
|  |      |                    | Female | 1990 | 32,053  | (25,089 to 39,804)  | 1315.5 | (1005.3 to 1586.7) |
|  |      |                    |        | 2013 | 72,051  | (44,845 to 98,819)  | 1306.6 | (885.0 to 1921.9)  |
|  |      |                    | Both   | 1990 | 52,950  | (45,282 to 64,807)  | 1074.5 | (913.8 to 1272.8)  |
|  |      |                    |        | 2013 | 124,497 | (83,329 to 158,841) | 1237.8 | (896.4 to 1623.8)  |
|  | YLDs | Ischemic Stroke    | Male   | 1990 | 362     | (240 to 502)        | 17.5   | (11.5 to 24.4)     |
|  |      |                    |        | 2013 | 513     | (328 to 731)        | 17.4   | (11.0 to 24.8)     |
|  |      |                    | Female | 1990 | 391     | (254 to 566)        | 17.4   | (11.4 to 25.0)     |
|  |      |                    |        | 2013 | 638     | (412 to 914)        | 18     | (11.6 to 25.9)     |
|  |      |                    | Both   | 1990 | 754     | (516 to 1,038)      | 17.4   | (12.1 to 24.4)     |
|  |      |                    |        | 2013 | 1,151   | (774 to 1,591)      | 17.8   | (11.9 to 24.6)     |
|  |      | Hemorrhagic Stroke | Male   | 1990 | 116     | (71 to 170)         | 4.7    | (2.8 to 6.9)       |
|  |      |                    |        | 2013 | 164     | (104 to 245)        | 4.7    | (2.9 to 7.1)       |
|  |      |                    | Female | 1990 | 114     | (72 to 165)         | 4.4    | (2.8 to 6.3)       |
|  |      |                    |        | 2013 | 170     | (106 to 248)        | 4.3    | (2.7 to 6.3)       |
|  |      |                    | Both   | 1990 | 231     | (151 to 321)        | 4.5    | (2.9 to 6.3)       |
|  |      |                    |        | 2013 | 335     | (224 to 467)        | 4.5    | (2.9 to 6.4)       |
